# Supplementary material for: Time-Course Transcriptome Analysis of Compatible and Incompatible Pollen-Stigma Interactions in Brassica napus L
Source: Front Plant Sci. 2017 May 3;8:682. doi: 10.3389/fpls.2017.00682 (PMC5413569; doi:10.3389/fpls.2017.00682)
Supplement: Supplementary file 3 [file DataSheet2.XLSX]

## Sheet: UP VS PC2
test_id	Bna_gene_id	gene_id	gene	locus	sample_1	sample_2	status	value_1	value_2	log2(fold_change)	test_stat	p_value	q_value	significant
GSBRNA2T00143088001	BnaC07g27160D	GSBRNA2G00143088001	GSBRNA2G00143088001	chrC07:32759180-32763739	UP	PC2	OK	14.3093	0.291918	-5.61525	-4.67339	0.0002	0.021826	yes
GSBRNA2T00109156001	BnaC08g24040D	GSBRNA2G00109156001	GSBRNA2G00109156001	chrC08:26149748-26153722	UP	PC2	OK	22.8909	5.69036	-2.00818	-3.17889	5e-05	0.00746503	yes
GSBRNA2T00019633001	BnaCnng30450D	GSBRNA2G00019633001	GSBRNA2G00019633001	chrCnn_random:28963812-28966966	UP	PC2	OK	14.3564	3.68273	-1.96284	-2.80584	0.00015	0.0174243	yes
GSBRNA2T00140456001	BnaC03g06960D	GSBRNA2G00140456001	GSBRNA2G00140456001	chrC03:3315513-3318860	UP	PC2	OK	6.44845	17.178	1.41354	2.39808	0.00045	0.0426947	yes
GSBRNA2T00148964001	BnaA03g07740D	GSBRNA2G00148964001	GSBRNA2G00148964001	chrA03:3437115-3439760	UP	PC2	OK	20.6812	58.7902	1.50726	2.6124	0.00025	0.026	yes
GSBRNA2T00107772001	BnaC01g11140D	GSBRNA2G00107772001	GSBRNA2G00107772001	chrC01:6928622-6930098	UP	PC2	OK	10.581	31.8297	1.5889	2.60346	0.00025	0.026	yes
GSBRNA2T00130956001	BnaC01g02870D	GSBRNA2G00130956001	GSBRNA2G00130956001	chrC01:1511473-1523983	UP	PC2	OK	1.78762	5.48314	1.61697	2.74256	0.00015	0.0174243	yes
GSBRNA2T00109355001	BnaC08g22570D	GSBRNA2G00109355001	GSBRNA2G00109355001	chrC08:25215897-25220432	UP	PC2	OK	3.61849	11.1491	1.62347	2.68083	0.0003	0.0299213	yes
GSBRNA2T00154580001	BnaC07g40160D	GSBRNA2G00154580001	GSBRNA2G00154580001	chrC07:40688287-40691192	UP	PC2	OK	24.1404	76.4802	1.66363	2.81879	0.0002	0.021826	yes
GSBRNA2T00128813001	BnaC07g20290D	GSBRNA2G00128813001	GSBRNA2G00128813001	chrC07:26975422-26977948	UP	PC2	OK	16.9166	55.6705	1.71847	2.91613	5e-05	0.00746503	yes
GSBRNA2T00052859001	BnaA10g10580D	GSBRNA2G00052859001	GSBRNA2G00052859001	chrA10:9009955-9011787	UP	PC2	OK	5.89621	19.5771	1.73131	2.69743	0.00015	0.0174243	yes
GSBRNA2T00126852001	BnaA08g09560D	GSBRNA2G00126852001	GSBRNA2G00126852001	chrA08:9118332-9120819	UP	PC2	OK	10.7098	36.1822	1.75634	2.96579	5e-05	0.00746503	yes
GSBRNA2T00108084001	BnaC04g33430D	GSBRNA2G00108084001	GSBRNA2G00108084001	chrC04:35061282-35064864	UP	PC2	OK	5.06253	17.3598	1.77782	2.92334	5e-05	0.00746503	yes
GSBRNA2T00035434001	BnaA09g47100D	GSBRNA2G00035434001	GSBRNA2G00035434001	chrA09:31788784-31790531	UP	PC2	OK	6.92947	23.8285	1.78187	2.70691	0.0003	0.0299213	yes
GSBRNA2T00033770001	BnaA08g30600D	GSBRNA2G00033770001	GSBRNA2G00033770001	chrA08_random:1606091-1607737	UP	PC2	OK	8.06931	27.9988	1.79485	2.7909	0.00015	0.0174243	yes
GSBRNA2T00001953001	BnaA06g35470D	GSBRNA2G00001953001	GSBRNA2G00001953001	chrA06:23305119-23307528	UP	PC2	OK	12.7092	44.962	1.82284	3.11687	5e-05	0.00746503	yes
GSBRNA2T00115339001	BnaC07g22030D	GSBRNA2G00115339001	GSBRNA2G00115339001	chrC07:28550782-28553655	UP	PC2	OK	21.2665	76.6022	1.8488	3.10946	5e-05	0.00746503	yes
GSBRNA2T00048010001	BnaC08g46700D	GSBRNA2G00048010001	GSBRNA2G00048010001	chrC08_random:945064-946978	UP	PC2	OK	6.48139	23.8285	1.87831	2.96757	0.0002	0.021826	yes
GSBRNA2T00138114001	BnaC01g12360D	GSBRNA2G00138114001	GSBRNA2G00138114001	chrC01:7831974-7834255	UP	PC2	OK	36.9835	137.461	1.89407	3.17471	0.0001	0.0129792	yes
GSBRNA2T00140791001	BnaC03g09740D	GSBRNA2G00140791001	GSBRNA2G00140791001	chrC03:4686940-4689410	UP	PC2	OK	12.0198	44.6936	1.89465	3.24651	5e-05	0.00746503	yes
GSBRNA2T00042766001	BnaA02g35880D	GSBRNA2G00042766001	GSBRNA2G00042766001	chrA02_random:590037-593386	UP	PC2	OK	9.35238	34.9906	1.90356	3.18421	5e-05	0.00746503	yes
GSBRNA2T00131539001	BnaA01g10780D	GSBRNA2G00131539001	GSBRNA2G00131539001	chrA01:5392561-5394801	UP	PC2	OK	10.3568	39.4115	1.92803	3.32152	5e-05	0.00746503	yes
GSBRNA2T00008113001	BnaA04g29360D	GSBRNA2G00008113001	GSBRNA2G00008113001	chrA04_random:1342480-1344706	UP	PC2	OK	6.90772	26.732	1.95229	3.0188	0.00025	0.026	yes
GSBRNA2T00151221001	BnaA03g41960D	GSBRNA2G00151221001	GSBRNA2G00151221001	chrA03:21074015-21079798	UP	PC2	OK	10.3808	40.6639	1.96983	3.33011	5e-05	0.00746503	yes
GSBRNA2T00000718001	BnaA06g24410D	GSBRNA2G00000718001	GSBRNA2G00000718001	chrA06:16997115-17000062	UP	PC2	OK	3.787	15.1478	1.99998	2.88113	0.0004	0.0384759	yes
GSBRNA2T00032751001	BnaC09g11360D	GSBRNA2G00032751001	GSBRNA2G00032751001	chrC09:7929484-7936144	UP	PC2	OK	1.72539	7.35262	2.09133	3.01901	0.0001	0.0129792	yes
GSBRNA2T00139858001	BnaC08g16080D	GSBRNA2G00139858001	GSBRNA2G00139858001	chrC08:20257415-20259058	UP	PC2	OK	6.06109	26.3047	2.11767	3.1074	5e-05	0.00746503	yes
GSBRNA2T00049502001	BnaA09g40020D	GSBRNA2G00049502001	GSBRNA2G00049502001	chrA09:28207712-28209428	UP	PC2	OK	3.0373	13.457	2.1475	2.96876	0.00025	0.026	yes
GSBRNA2T00085280001	BnaC03g44780D	GSBRNA2G00085280001	GSBRNA2G00085280001	chrC03:29892346-29896303	UP	PC2	OK	1.28954	5.72986	2.15164	2.88136	0.00035	0.0341387	yes
GSBRNA2T00064716001	BnaC04g00440D	GSBRNA2G00064716001	GSBRNA2G00064716001	chrC04:365363-366014	UP	PC2	OK	63.7691	284.399	2.15699	3.32531	5e-05	0.00746503	yes
GSBRNA2T00149293001	BnaA04g00410D	GSBRNA2G00149293001	GSBRNA2G00149293001	chrA04:240976-243984	UP	PC2	OK	44.4355	199.061	2.16343	2.88392	0.00015	0.0174243	yes
GSBRNA2T00018531001	BnaC01g39610D	GSBRNA2G00018531001	GSBRNA2G00018531001	chrC01:38241332-38243163	UP	PC2	OK	5.62162	25.2934	2.1697	3.20909	0.0001	0.0129792	yes
GSBRNA2T00141899001	BnaA03g16020D	GSBRNA2G00141899001	GSBRNA2G00141899001	chrA03:7407851-7409946	UP	PC2	OK	10.0616	45.3434	2.17203	3.26557	5e-05	0.00746503	yes
GSBRNA2T00137371001	BnaA03g35520D	GSBRNA2G00137371001	GSBRNA2G00137371001	chrA03:17345517-17348242	UP	PC2	OK	4.99874	22.5679	2.17464	3.34954	5e-05	0.00746503	yes
GSBRNA2T00060745001	BnaC03g13310D	GSBRNA2G00060745001	GSBRNA2G00060745001	chrC03:6446695-6449759	UP	PC2	OK	3.89064	17.6577	2.18222	3.17683	0.00015	0.0174243	yes
GSBRNA2T00056416001	BnaA09g11080D	GSBRNA2G00056416001	GSBRNA2G00056416001	chrA09:5704449-5711109	UP	PC2	OK	1.23626	5.64772	2.19169	3.00942	0.0003	0.0299213	yes
GSBRNA2T00137084001	BnaC02g22250D	GSBRNA2G00137084001	GSBRNA2G00137084001	chrC02:19100902-19101865	UP	PC2	OK	7.31362	33.9874	2.21634	3.23665	5e-05	0.00746503	yes
GSBRNA2T00141491001	BnaC03g51470D	GSBRNA2G00141491001	GSBRNA2G00141491001	chrC03:36041198-36046903	UP	PC2	OK	4.85044	22.5975	2.21997	3.71513	5e-05	0.00746503	yes
GSBRNA2T00075848001	BnaA03g11700D	GSBRNA2G00075848001	GSBRNA2G00075848001	chrA03:5260774-5264151	UP	PC2	OK	3.95123	18.706	2.24313	3.37271	5e-05	0.00746503	yes
GSBRNA2T00087127001	BnaA06g38950D	GSBRNA2G00087127001	GSBRNA2G00087127001	chrA06_random:1037202-1038178	UP	PC2	OK	6.17819	30.8643	2.32068	3.00607	0.0001	0.0129792	yes
GSBRNA2T00145376001	BnaC08g00120D	GSBRNA2G00145376001	GSBRNA2G00145376001	chrC08:49305-53872	UP	PC2	OK	1.41801	7.27092	2.35827	3.2177	0.00015	0.0174243	yes
GSBRNA2T00142853001	BnaC07g25330D	GSBRNA2G00142853001	GSBRNA2G00142853001	chrC07:31475071-31477711	UP	PC2	OK	2.75545	14.5611	2.40176	3.17799	0.00035	0.0341387	yes
GSBRNA2T00075294001	BnaA03g47910D	GSBRNA2G00075294001	GSBRNA2G00075294001	chrA03:24653637-24656658	UP	PC2	OK	16.5854	91.5245	2.46425	3.89001	5e-05	0.00746503	yes
GSBRNA2T00055882001	BnaC03g27970D	GSBRNA2G00055882001	GSBRNA2G00055882001	chrC03:16339160-16341317	UP	PC2	OK	2.55024	14.1711	2.47424	3.44348	5e-05	0.00746503	yes
GSBRNA2T00150246001	BnaA10g02860D	GSBRNA2G00150246001	GSBRNA2G00150246001	chrA10:1480358-1483999	UP	PC2	OK	0.841632	4.83185	2.52131	3.08637	0.00015	0.0174243	yes
GSBRNA2T00122954001	BnaA10g05260D	GSBRNA2G00122954001	GSBRNA2G00122954001	chrA10:3001257-3005403	UP	PC2	OK	2.59124	15.0952	2.54238	3.63247	5e-05	0.00746503	yes
GSBRNA2T00120717001	BnaC02g38360D	GSBRNA2G00120717001	GSBRNA2G00120717001	chrC02:41340976-41342766	UP	PC2	OK	5.94136	35.1081	2.56294	3.5868	5e-05	0.00746503	yes
GSBRNA2T00154770001	BnaA03g36390D	GSBRNA2G00154770001	GSBRNA2G00154770001	chrA03:17814355-17816156	UP	PC2	OK	7.43166	44.0593	2.56769	4.05468	5e-05	0.00746503	yes
GSBRNA2T00063754001	BnaCnng08080D	GSBRNA2G00063754001	GSBRNA2G00063754001	chrCnn_random:7469653-7473057	UP	PC2	OK	5.88666	35.053	2.57402	4.12275	5e-05	0.00746503	yes
GSBRNA2T00125190001	BnaC03g35500D	GSBRNA2G00125190001	GSBRNA2G00125190001	chrC03:21557259-21558509	UP	PC2	OK	4.56235	27.96	2.61552	3.3676	0.00035	0.0341387	yes
GSBRNA2T00122822001	BnaA10g04370D	GSBRNA2G00122822001	GSBRNA2G00122822001	chrA10:2298603-2301709	UP	PC2	OK	4.15209	25.4873	2.61787	3.58567	5e-05	0.00746503	yes
GSBRNA2T00094996001	BnaA08g03920D	GSBRNA2G00094996001	GSBRNA2G00094996001	chrA08:3231532-3233325	UP	PC2	OK	3.60993	22.1636	2.61815	3.73623	5e-05	0.00746503	yes
GSBRNA2T00100301001	BnaC07g47300D	GSBRNA2G00100301001	GSBRNA2G00100301001	chrC07:44591927-44595165	UP	PC2	OK	0.744389	4.58174	2.62177	2.93888	0.00045	0.0426947	yes
GSBRNA2T00076199001	BnaA07g07570D	GSBRNA2G00076199001	GSBRNA2G00076199001	chrA07:7849875-7852244	UP	PC2	OK	7.14028	44.2479	2.63156	3.4893	0.0001	0.0129792	yes
GSBRNA2T00047657001	BnaC03g63960D	GSBRNA2G00047657001	GSBRNA2G00047657001	chrC03:53450631-53452738	UP	PC2	OK	6.32046	39.7531	2.65297	3.972	5e-05	0.00746503	yes
GSBRNA2T00121425001	BnaA01g01750D	GSBRNA2G00121425001	GSBRNA2G00121425001	chrA01:912922-924258	UP	PC2	OK	1.21287	7.67843	2.66238	4.32666	5e-05	0.00746503	yes
GSBRNA2T00026392001	BnaC03g42260D	GSBRNA2G00026392001	GSBRNA2G00026392001	chrC03:27048428-27050334	UP	PC2	OK	6.4143	42.266	2.72014	4.07355	5e-05	0.00746503	yes
GSBRNA2T00144552001	BnaA06g31290D	GSBRNA2G00144552001	GSBRNA2G00144552001	chrA06:21065185-21067780	UP	PC2	OK	2.30145	16.3504	2.82871	3.44958	0.00035	0.0341387	yes
GSBRNA2T00101740001	BnaC05g35510D	GSBRNA2G00101740001	GSBRNA2G00101740001	chrC05:34873172-34878384	UP	PC2	OK	2.78819	20.3547	2.86796	4.25714	5e-05	0.00746503	yes
GSBRNA2T00019696001	BnaCnng30550D	GSBRNA2G00019696001	GSBRNA2G00019696001	chrCnn_random:29036251-29039848	UP	PC2	OK	6.71708	49.3726	2.8778	4.02471	5e-05	0.00746503	yes
GSBRNA2T00077447001	BnaC09g33580D	GSBRNA2G00077447001	GSBRNA2G00077447001	chrC09:36872443-36876313	UP	PC2	OK	2.94966	22.6709	2.94222	4.43882	5e-05	0.00746503	yes
GSBRNA2T00153882001	BnaA05g22270D	GSBRNA2G00153882001	GSBRNA2G00153882001	chrA05:17024725-17030088	UP	PC2	OK	4.51835	35.2389	2.9633	4.73054	5e-05	0.00746503	yes
GSBRNA2T00031454001	BnaC07g33060D	GSBRNA2G00031454001	GSBRNA2G00031454001	chrC07:36390301-36396061	UP	PC2	OK	5.83422	46.0424	2.98035	4.74349	5e-05	0.00746503	yes
GSBRNA2T00045443001	BnaC09g47860D	GSBRNA2G00045443001	GSBRNA2G00045443001	chrC09:46983331-46985296	UP	PC2	OK	17.1329	140.192	3.03256	4.63298	5e-05	0.00746503	yes
GSBRNA2T00155183001	BnaC04g46690D	GSBRNA2G00155183001	GSBRNA2G00155183001	chrC04:45921785-45931498	UP	PC2	OK	2.6549	22.7285	3.09777	4.30952	5e-05	0.00746503	yes
GSBRNA2T00121376001	BnaA01g02230D	GSBRNA2G00121376001	GSBRNA2G00121376001	chrA01:1142698-1147072	UP	PC2	OK	6.89308	60.7476	3.13961	4.73134	5e-05	0.00746503	yes
GSBRNA2T00132968001	BnaA05g00800D	GSBRNA2G00132968001	GSBRNA2G00132968001	chrA05:467360-468011	UP	PC2	OK	35.3205	313.942	3.15192	5.00071	5e-05	0.00746503	yes
GSBRNA2T00057374001	BnaA09g47460D	GSBRNA2G00057374001	GSBRNA2G00057374001	chrA09:31990455-31992915	UP	PC2	OK	2.67732	24.5298	3.19568	4.07542	5e-05	0.00746503	yes
GSBRNA2T00150687001	BnaA08g18320D	GSBRNA2G00150687001	GSBRNA2G00150687001	chrA08:14362176-14363947	UP	PC2	OK	2.84901	26.9204	3.24017	3.92182	5e-05	0.00746503	yes
GSBRNA2T00001337001	BnaA02g05410D	GSBRNA2G00001337001	GSBRNA2G00001337001	chrA02:2480806-2483472	UP	PC2	OK	3.31788	31.4346	3.24402	4.38717	5e-05	0.00746503	yes
GSBRNA2T00053102001	BnaC02g12030D	GSBRNA2G00053102001	GSBRNA2G00053102001	chrC02:7422997-7427787	UP	PC2	OK	5.9149	56.3218	3.25127	5.03581	5e-05	0.00746503	yes
GSBRNA2T00116783001	BnaA05g05550D	GSBRNA2G00116783001	GSBRNA2G00116783001	chrA05:2903352-2908788	UP	PC2	OK	2.34284	22.8081	3.28322	4.48647	5e-05	0.00746503	yes
GSBRNA2T00136135001	BnaA10g23860D	GSBRNA2G00136135001	GSBRNA2G00136135001	chrA10:15680728-15682706	UP	PC2	OK	2.66668	26.0783	3.28973	4.03011	5e-05	0.00746503	yes
GSBRNA2T00017259001	BnaCnng73470D	GSBRNA2G00017259001	GSBRNA2G00017259001	chrCnn_random:74071303-74072988	UP	PC2	OK	0.678552	6.76493	3.31754	3.41193	0.00045	0.0426947	yes
GSBRNA2T00079037001	BnaA10g06640D	GSBRNA2G00079037001	GSBRNA2G00079037001	chrA10:5094398-5095787	UP	PC2	OK	1.97787	20.3395	3.36227	3.92491	5e-05	0.00746503	yes
GSBRNA2T00113509001	BnaA03g40500D	GSBRNA2G00113509001	GSBRNA2G00113509001	chrA03:20235011-20236815	UP	PC2	OK	2.58716	27.521	3.41109	3.67405	0.00045	0.0426947	yes
GSBRNA2T00096582001	BnaCnng66900D	GSBRNA2G00096582001	GSBRNA2G00096582001	chrCnn_random:66590503-66592591	UP	PC2	OK	4.06567	44.216	3.443	4.89887	5e-05	0.00746503	yes
GSBRNA2T00109882001	BnaA06g22030D	GSBRNA2G00109882001	GSBRNA2G00109882001	chrA06:15402997-15404567	UP	PC2	OK	1.56106	17.2416	3.4653	3.55892	0.00015	0.0174243	yes
GSBRNA2T00148620001	BnaA03g10620D	GSBRNA2G00148620001	GSBRNA2G00148620001	chrA03:4795742-4799004	UP	PC2	OK	4.10141	45.302	3.46538	4.9958	5e-05	0.00746503	yes
GSBRNA2T00012167001	BnaC04g36920D	GSBRNA2G00012167001	GSBRNA2G00012167001	chrC04:38375692-38377595	UP	PC2	OK	1.70155	18.9978	3.48092	3.76078	0.0002	0.021826	yes
GSBRNA2T00132340001	BnaC03g19130D	GSBRNA2G00132340001	GSBRNA2G00132340001	chrC03:9906507-9908826	UP	PC2	OK	2.39037	26.7155	3.48237	3.59721	0.00035	0.0341387	yes
GSBRNA2T00076367001	BnaC03g58910D	GSBRNA2G00076367001	GSBRNA2G00076367001	chrC03:48164432-48165553	UP	PC2	OK	3.25745	36.4374	3.48361	3.82289	0.0001	0.0129792	yes
GSBRNA2T00136918001	BnaC08g36500D	GSBRNA2G00136918001	GSBRNA2G00136918001	chrC08:33750555-33753773	UP	PC2	OK	5.64113	64.9145	3.52448	5.24492	5e-05	0.00746503	yes
GSBRNA2T00150895001	BnaA08g16720D	GSBRNA2G00150895001	GSBRNA2G00150895001	chrA08:13517878-13521291	UP	PC2	OK	1.73911	20.1141	3.53179	4.81507	5e-05	0.00746503	yes
GSBRNA2T00033738001	BnaC03g74760D	GSBRNA2G00033738001	GSBRNA2G00033738001	chrC03_random:2844106-2845609	UP	PC2	OK	1.63548	18.9407	3.5337	3.75785	0.0001	0.0129792	yes
GSBRNA2T00067347001	BnaC09g21800D	GSBRNA2G00067347001	GSBRNA2G00067347001	chrC09:19037872-19040199	UP	PC2	OK	1.03423	12.2351	3.5644	3.71376	0.0003	0.0299213	yes
GSBRNA2T00090247001	BnaA04g12240D	GSBRNA2G00090247001	GSBRNA2G00090247001	chrA04:10419234-10422793	UP	PC2	OK	1.26433	15.1086	3.57893	4.61886	5e-05	0.00746503	yes
GSBRNA2T00059448001	BnaA07g00870D	GSBRNA2G00059448001	GSBRNA2G00059448001	chrA07:614477-617853	UP	PC2	OK	7.7314	92.8604	3.58626	5.45939	5e-05	0.00746503	yes
GSBRNA2T00146043001	BnaC09g04500D	GSBRNA2G00146043001	GSBRNA2G00146043001	chrC09:2573612-2575815	UP	PC2	OK	2.14804	25.8752	3.59048	4.9188	5e-05	0.00746503	yes
GSBRNA2T00073646001	BnaC02g13820D	GSBRNA2G00073646001	GSBRNA2G00073646001	chrC02:9142507-9146099	UP	PC2	OK	3.10748	37.6205	3.5977	5.22579	5e-05	0.00746503	yes
GSBRNA2T00127193001	BnaC08g32950D	GSBRNA2G00127193001	GSBRNA2G00127193001	chrC08:31662579-31671855	UP	PC2	OK	0.280894	3.41009	3.60171	3.61928	5e-05	0.00746503	yes
GSBRNA2T00149065001	BnaA04g02260D	GSBRNA2G00149065001	GSBRNA2G00149065001	chrA04:1462057-1462243	UP	PC2	OK	85.0628	1036.42	3.60694	3.85103	0.00025	0.026	yes
GSBRNA2T00052820001	BnaA10g10880D	GSBRNA2G00052820001	GSBRNA2G00052820001	chrA10:9212153-9214941	UP	PC2	OK	2.00754	24.5194	3.61043	4.32187	5e-05	0.00746503	yes
GSBRNA2T00043969001	BnaA02g35410D	GSBRNA2G00043969001	GSBRNA2G00043969001	chrA02_random:252434-255509	UP	PC2	OK	5.31868	65.6467	3.62558	5.41933	5e-05	0.00746503	yes
GSBRNA2T00007279001	BnaC03g71790D	GSBRNA2G00007279001	GSBRNA2G00007279001	chrC03_random:334992-338193	UP	PC2	OK	2.36019	29.4824	3.64288	4.67418	5e-05	0.00746503	yes
GSBRNA2T00135556001	BnaA10g18990D	GSBRNA2G00135556001	GSBRNA2G00135556001	chrA10:13639478-13641483	UP	PC2	OK	0.803825	10.1837	3.66324	3.78077	5e-05	0.00746503	yes
GSBRNA2T00136137001	BnaA10g23880D	GSBRNA2G00136137001	GSBRNA2G00136137001	chrA10:15687854-15689806	UP	PC2	OK	10.6676	136.319	3.67568	5.26187	5e-05	0.00746503	yes
GSBRNA2T00072371001	BnaA09g18340D	GSBRNA2G00072371001	GSBRNA2G00072371001	chrA09:11423248-11428344	UP	PC2	OK	2.12251	27.4695	3.69399	4.3437	5e-05	0.00746503	yes
GSBRNA2T00076135001	BnaA05g32260D	GSBRNA2G00076135001	GSBRNA2G00076135001	chrA05:22116463-22119224	UP	PC2	OK	0.76666	9.93427	3.69575	3.87345	0.00015	0.0174243	yes
GSBRNA2T00028989001	BnaC06g18580D	GSBRNA2G00028989001	GSBRNA2G00028989001	chrC06:20929704-20932437	UP	PC2	OK	1.4033	18.4035	3.71308	4.40817	5e-05	0.00746503	yes
GSBRNA2T00104151001	BnaC09g44650D	GSBRNA2G00104151001	GSBRNA2G00104151001	chrC09:45367915-45371109	UP	PC2	OK	1.35527	18.0119	3.7323	4.89694	5e-05	0.00746503	yes
GSBRNA2T00009793001	BnaA09g02760D	GSBRNA2G00009793001	GSBRNA2G00009793001	chrA09:1408219-1411015	UP	PC2	OK	8.72676	115.987	3.73237	5.65586	5e-05	0.00746503	yes
GSBRNA2T00078344001	BnaA09g43940D	GSBRNA2G00078344001	GSBRNA2G00078344001	chrA09:30284900-30288190	UP	PC2	OK	2.70846	36.5219	3.75321	5.08763	5e-05	0.00746503	yes
GSBRNA2T00136136001	BnaA10g23870D	GSBRNA2G00136136001	GSBRNA2G00136136001	chrA10:15683922-15685873	UP	PC2	OK	5.43187	73.4271	3.75679	5.01538	5e-05	0.00746503	yes
GSBRNA2T00105529001	BnaA06g08900D	GSBRNA2G00105529001	GSBRNA2G00105529001	chrA06:4822726-4825769	UP	PC2	OK	3.67323	50.6675	3.78594	5.27971	5e-05	0.00746503	yes
GSBRNA2T00059872001	BnaC03g41470D	GSBRNA2G00059872001	GSBRNA2G00059872001	chrC03:26429525-26431892	UP	PC2	OK	1.21372	16.8454	3.79484	4.4404	5e-05	0.00746503	yes
GSBRNA2T00138676001	BnaA03g23580D	GSBRNA2G00138676001	GSBRNA2G00138676001	chrA03:11271408-11273915	UP	PC2	OK	0.972957	13.6272	3.80797	4.41973	5e-05	0.00746503	yes
GSBRNA2T00073063001	BnaA08g20630D	GSBRNA2G00073063001	GSBRNA2G00073063001	chrA08:15497310-15498127	UP	PC2	OK	1.77306	25.7473	3.86011	3.81087	0.0002	0.021826	yes
GSBRNA2T00122669001	BnaC02g12730D	GSBRNA2G00122669001	GSBRNA2G00122669001	chrC02:8102753-8105962	UP	PC2	OK	4.08655	62.6349	3.93801	5.65241	5e-05	0.00746503	yes
GSBRNA2T00099011001	BnaA07g18550D	GSBRNA2G00099011001	GSBRNA2G00099011001	chrA07:15089970-15093068	UP	PC2	OK	0.752976	11.5847	3.94347	4.03084	5e-05	0.00746503	yes
GSBRNA2T00137360001	BnaA03g35630D	GSBRNA2G00137360001	GSBRNA2G00137360001	chrA03:17398863-17401047	UP	PC2	OK	1.25531	19.5759	3.96296	4.7018	5e-05	0.00746503	yes
GSBRNA2T00055780001	BnaC02g43880D	GSBRNA2G00055780001	GSBRNA2G00055780001	chrC02:45990312-45993085	UP	PC2	OK	0.652657	10.7071	4.0361	4.03794	5e-05	0.00746503	yes
GSBRNA2T00009608001	BnaA09g04970D	GSBRNA2G00009608001	GSBRNA2G00009608001	chrA09:2446828-2448987	UP	PC2	OK	1.09819	18.9766	4.11103	4.80543	5e-05	0.00746503	yes
GSBRNA2T00054617001	BnaCnng51570D	GSBRNA2G00054617001	GSBRNA2G00054617001	chrCnn_random:51032707-51035062	UP	PC2	OK	0.807772	14.2163	4.13746	4.29738	5e-05	0.00746503	yes
GSBRNA2T00020062001	BnaA06g40790D	GSBRNA2G00020062001	GSBRNA2G00020062001	chrA06_random:2182102-2184712	UP	PC2	OK	1.57363	28.1895	4.16299	5.61731	5e-05	0.00746503	yes
GSBRNA2T00125323001	BnaC03g34580D	GSBRNA2G00125323001	GSBRNA2G00125323001	chrC03:20973434-20975192	UP	PC2	OK	0.800836	14.4542	4.17384	4.38006	5e-05	0.00746503	yes
GSBRNA2T00098727001	BnaA07g16250D	GSBRNA2G00098727001	GSBRNA2G00098727001	chrA07:13817141-13818980	UP	PC2	OK	1.85695	34.8362	4.22958	4.22647	5e-05	0.00746503	yes
GSBRNA2T00090908001	BnaA02g11790D	GSBRNA2G00090908001	GSBRNA2G00090908001	chrA02:6182711-6184239	UP	PC2	OK	0.904171	17.2751	4.25595	4.16622	5e-05	0.00746503	yes
GSBRNA2T00096612001	BnaCnng19220D	GSBRNA2G00096612001	GSBRNA2G00096612001	chrCnn_random:17903979-17904866	UP	PC2	OK	15.2876	296.961	4.27984	6.2153	5e-05	0.00746503	yes
GSBRNA2T00111879001	BnaA03g29240D	GSBRNA2G00111879001	GSBRNA2G00111879001	chrA03:14224591-14225789	UP	PC2	OK	1.25822	24.6204	4.29039	3.62953	0.0004	0.0384759	yes
GSBRNA2T00018422001	BnaA09g00750D	GSBRNA2G00018422001	GSBRNA2G00018422001	chrA09:476937-477869	UP	PC2	OK	11.4563	224.202	4.29059	6.11321	5e-05	0.00746503	yes
GSBRNA2T00032039001	BnaC05g04600D	GSBRNA2G00032039001	GSBRNA2G00032039001	chrC05:2260658-2262854	UP	PC2	OK	1.79529	35.3878	4.30096	4.95218	5e-05	0.00746503	yes
GSBRNA2T00123615001	BnaC03g37900D	GSBRNA2G00123615001	GSBRNA2G00123615001	chrC03:23187171-23189541	UP	PC2	OK	0.92302	19.019	4.36494	4.53316	5e-05	0.00746503	yes
GSBRNA2T00009514001	BnaA09g04200D	GSBRNA2G00009514001	GSBRNA2G00009514001	chrA09:2085449-2085686	UP	PC2	OK	18.4283	390.528	4.40543	3.95458	0.00035	0.0341387	yes
GSBRNA2T00138420001	BnaA01g19850D	GSBRNA2G00138420001	GSBRNA2G00138420001	chrA01:11464957-11467265	UP	PC2	OK	1.0949	23.3503	4.41457	4.69516	5e-05	0.00746503	yes
GSBRNA2T00140434001	BnaC03g06740D	GSBRNA2G00140434001	GSBRNA2G00140434001	chrC03:3225420-3227665	UP	PC2	OK	0.830413	18.2782	4.46015	4.15339	0.0004	0.0384759	yes
GSBRNA2T00059181001	BnaC03g58640D	GSBRNA2G00059181001	GSBRNA2G00059181001	chrC03:47923963-47924499	UP	PC2	OK	2.91007	64.2693	4.465	3.85119	0.00025	0.026	yes
GSBRNA2T00156919001	BnaC07g36670D	GSBRNA2G00156919001	GSBRNA2G00156919001	chrC07:38642450-38646115	UP	PC2	OK	3.48113	79.4623	4.51264	6.44664	5e-05	0.00746503	yes
GSBRNA2T00049471001	BnaA09g39720D	GSBRNA2G00049471001	GSBRNA2G00049471001	chrA09:28106988-28109066	UP	PC2	OK	5.59187	128.817	4.52585	5.82716	5e-05	0.00746503	yes
GSBRNA2T00137700001	BnaA03g32800D	GSBRNA2G00137700001	GSBRNA2G00137700001	chrA03:15835061-15837447	UP	PC2	OK	0.92004	21.38	4.53842	4.67084	5e-05	0.00746503	yes
GSBRNA2T00041446001	BnaA02g09870D	GSBRNA2G00041446001	GSBRNA2G00041446001	chrA02:4950702-4954201	UP	PC2	OK	0.836376	19.9387	4.57528	4.82642	5e-05	0.00746503	yes
GSBRNA2T00108140001	BnaC04g33890D	GSBRNA2G00108140001	GSBRNA2G00108140001	chrC04:35390685-35392686	UP	PC2	OK	1.10723	26.4054	4.57581	4.54999	5e-05	0.00746503	yes
GSBRNA2T00006023001	BnaAnng03120D	GSBRNA2G00006023001	GSBRNA2G00006023001	chrAnn_random:2481793-2483609	UP	PC2	OK	0.683867	16.4164	4.58528	4.57948	5e-05	0.00746503	yes
GSBRNA2T00141693001	BnaC03g50220D	GSBRNA2G00141693001	GSBRNA2G00141693001	chrC03:34901995-34905678	UP	PC2	OK	0.245873	5.94644	4.59604	4.24495	0.0003	0.0299213	yes
GSBRNA2T00130886001	BnaC01g03500D	GSBRNA2G00130886001	GSBRNA2G00130886001	chrC01:1811440-1815719	UP	PC2	OK	2.19364	54.1731	4.62618	6.26549	5e-05	0.00746503	yes
GSBRNA2T00031979001	BnaC05g04080D	GSBRNA2G00031979001	GSBRNA2G00031979001	chrC05:1988936-1993604	UP	PC2	OK	0.478101	11.817	4.62741	4.84395	5e-05	0.00746503	yes
GSBRNA2T00087972001	BnaA10g03960D	GSBRNA2G00087972001	GSBRNA2G00087972001	chrA10:2101911-2106870	UP	PC2	OK	0.622292	15.5598	4.64409	4.82455	5e-05	0.00746503	yes
GSBRNA2T00077003001	BnaA04g20340D	GSBRNA2G00077003001	GSBRNA2G00077003001	chrA04:15697498-15699770	UP	PC2	OK	4.19376	108.763	4.6968	5.98541	5e-05	0.00746503	yes
GSBRNA2T00065089001	BnaCnng08890D	GSBRNA2G00065089001	GSBRNA2G00065089001	chrCnn_random:8194479-8196157	UP	PC2	OK	0.699814	18.2913	4.70804	3.97114	0.00035	0.0341387	yes
GSBRNA2T00113661001	BnaA03g39260D	GSBRNA2G00113661001	GSBRNA2G00113661001	chrA03:19570110-19575083	UP	PC2	OK	0.426413	11.3383	4.73281	4.73486	0.0002	0.021826	yes
GSBRNA2T00012629001	BnaC04g05270D	GSBRNA2G00012629001	GSBRNA2G00012629001	chrC04:3733319-3736868	UP	PC2	OK	2.13369	56.7775	4.7339	5.87123	5e-05	0.00746503	yes
GSBRNA2T00107093001	BnaC09g48600D	GSBRNA2G00107093001	GSBRNA2G00107093001	chrC09:47328694-47330684	UP	PC2	OK	3.34909	90.8473	4.7616	5.62595	5e-05	0.00746503	yes
GSBRNA2T00085697001	BnaC04g42320D	GSBRNA2G00085697001	GSBRNA2G00085697001	chrC04:42891175-42894233	UP	PC2	OK	0.774248	21.3781	4.7872	5.17755	5e-05	0.00746503	yes
GSBRNA2T00079842001	BnaAnng28400D	GSBRNA2G00079842001	GSBRNA2G00079842001	chrAnn_random:32449232-32452545	UP	PC2	OK	0.378503	10.4528	4.78745	4.43939	0.0002	0.021826	yes
GSBRNA2T00054182001	BnaC05g12390D	GSBRNA2G00054182001	GSBRNA2G00054182001	chrC05:7168046-7171596	UP	PC2	OK	0.431849	11.9865	4.79474	4.25504	0.00015	0.0174243	yes
GSBRNA2T00133749001	BnaC07g28310D	GSBRNA2G00133749001	GSBRNA2G00133749001	chrC07:33479806-33482229	UP	PC2	OK	0.420018	11.786	4.81049	4.47084	0.0004	0.0384759	yes
GSBRNA2T00062035001	BnaC05g10210D	GSBRNA2G00062035001	GSBRNA2G00062035001	chrC05:5736645-5739548	UP	PC2	OK	0.949487	27.7845	4.87099	5.09165	5e-05	0.00746503	yes
GSBRNA2T00111771001	BnaA03g30180D	GSBRNA2G00111771001	GSBRNA2G00111771001	chrA03:14640282-14642602	UP	PC2	OK	2.24845	66.212	4.88009	6.26435	5e-05	0.00746503	yes
GSBRNA2T00000167001	BnaA05g26490D	GSBRNA2G00000167001	GSBRNA2G00000167001	chrA05:19394218-19396152	UP	PC2	OK	1.01783	30.1665	4.88937	4.51974	5e-05	0.00746503	yes
GSBRNA2T00157538001	BnaC01g17820D	GSBRNA2G00157538001	GSBRNA2G00157538001	chrC01:12247230-12251456	UP	PC2	OK	1.13483	33.7705	4.89521	4.79964	0.00015	0.0174243	yes
GSBRNA2T00077001001	BnaA04g20360D	GSBRNA2G00077001001	GSBRNA2G00077001001	chrA04:15705732-15707918	UP	PC2	OK	3.05595	92.309	4.91678	5.72996	5e-05	0.00746503	yes
GSBRNA2T00149616001	BnaA01g15090D	GSBRNA2G00149616001	GSBRNA2G00149616001	chrA01:7692787-7696164	UP	PC2	OK	1.24926	38.5824	4.94879	4.85977	0.00025	0.026	yes
GSBRNA2T00035758001	BnaC09g09390D	GSBRNA2G00035758001	GSBRNA2G00035758001	chrC09:6095044-6097337	UP	PC2	OK	1.12304	35.6622	4.98892	5.26268	5e-05	0.00746503	yes
GSBRNA2T00009517001	BnaA09g04230D	GSBRNA2G00009517001	GSBRNA2G00009517001	chrA09:2092283-2092529	UP	PC2	OK	63.3631	2026.02	4.99886	9.77978	5e-05	0.00746503	yes
GSBRNA2T00059183001	BnaC03g58660D	GSBRNA2G00059183001	GSBRNA2G00059183001	chrC03:47939396-47941032	UP	PC2	OK	0.739354	23.7911	5.00801	4.25923	0.00015	0.0174243	yes
GSBRNA2T00145932001	BnaC09g03610D	GSBRNA2G00145932001	GSBRNA2G00145932001	chrC09:2060734-2060962	UP	PC2	OK	43.6515	1421.26	5.025	5.50901	5e-05	0.00746503	yes
GSBRNA2T00149961001	BnaC03g45190D	GSBRNA2G00149961001	GSBRNA2G00149961001	chrC03:30197603-30198824	UP	PC2	OK	0.654622	21.3917	5.03024	4.28769	0.0003	0.0299213	yes
GSBRNA2T00051169001	BnaA08g30830D	GSBRNA2G00051169001	GSBRNA2G00051169001	chrA08_random:1721573-1722322	UP	PC2	OK	3.98635	130.744	5.03553	5.87827	5e-05	0.00746503	yes
GSBRNA2T00042034001	BnaC09g15570D	GSBRNA2G00042034001	GSBRNA2G00042034001	chrC09:12390261-12391530	UP	PC2	OK	0.798784	26.281	5.04007	4.66219	0.00015	0.0174243	yes
GSBRNA2T00100311001	BnaC07g47390D	GSBRNA2G00100311001	GSBRNA2G00100311001	chrC07:44623201-44625811	UP	PC2	OK	0.846038	27.9206	5.04446	5.79624	5e-05	0.00746503	yes
GSBRNA2T00045045001	BnaA09g09160D	GSBRNA2G00045045001	GSBRNA2G00045045001	chrA09:4567441-4569663	UP	PC2	OK	0.88962	30.0417	5.07763	4.52613	5e-05	0.00746503	yes
GSBRNA2T00061117001	BnaC03g60420D	GSBRNA2G00061117001	GSBRNA2G00061117001	chrC03:49575467-49578085	UP	PC2	OK	0.576325	19.4758	5.07866	5.0652	0.0003	0.0299213	yes
GSBRNA2T00093833001	BnaCnng18160D	GSBRNA2G00093833001	GSBRNA2G00093833001	chrCnn_random:16936989-16938582	UP	PC2	OK	2.61678	88.7824	5.08441	6.33283	5e-05	0.00746503	yes
GSBRNA2T00023807001	BnaC05g39980D	GSBRNA2G00023807001	GSBRNA2G00023807001	chrC05:38312815-38315047	UP	PC2	OK	2.57468	88.1133	5.09689	6.38374	5e-05	0.00746503	yes
GSBRNA2T00147846001	BnaC06g37750D	GSBRNA2G00147846001	GSBRNA2G00147846001	chrC06:35644119-35644878	UP	PC2	OK	2.8409	98.2543	5.1121	5.13414	5e-05	0.00746503	yes
GSBRNA2T00072978001	BnaCnng10290D	GSBRNA2G00072978001	GSBRNA2G00072978001	chrCnn_random:9360808-9362430	UP	PC2	OK	2.61334	91.2979	5.12662	5.53132	5e-05	0.00746503	yes
GSBRNA2T00144556001	BnaA06g31320D	GSBRNA2G00144556001	GSBRNA2G00144556001	chrA06:21077203-21079483	UP	PC2	OK	4.6712	163.445	5.12887	6.59713	5e-05	0.00746503	yes
GSBRNA2T00138807001	BnaA03g22500D	GSBRNA2G00138807001	GSBRNA2G00138807001	chrA03:10681807-10684654	UP	PC2	OK	0.956443	33.8674	5.14608	4.33382	0.00015	0.0174243	yes
GSBRNA2T00101037001	BnaC04g28060D	GSBRNA2G00101037001	GSBRNA2G00101037001	chrC04:29471180-29473081	UP	PC2	OK	3.14865	114.041	5.17868	6.13717	5e-05	0.00746503	yes
GSBRNA2T00073359001	BnaC02g34750D	GSBRNA2G00073359001	GSBRNA2G00073359001	chrC02:37391216-37393552	UP	PC2	OK	1.18948	43.1068	5.17952	5.56662	5e-05	0.00746503	yes
GSBRNA2T00149415001	BnaA01g16670D	GSBRNA2G00149415001	GSBRNA2G00149415001	chrA01:8692976-8694694	UP	PC2	OK	0.86352	31.2958	5.1796	5.35659	5e-05	0.00746503	yes
GSBRNA2T00019139001	BnaC03g23540D	GSBRNA2G00019139001	GSBRNA2G00019139001	chrC03:13126441-13127773	UP	PC2	OK	1.14975	41.9192	5.18821	4.57116	5e-05	0.00746503	yes
GSBRNA2T00002764001	BnaC05g02570D	GSBRNA2G00002764001	GSBRNA2G00002764001	chrC05:1250504-1254969	UP	PC2	OK	0.299894	10.9734	5.19342	4.66594	0.0001	0.0129792	yes
GSBRNA2T00115206001	BnaC04g25500D	GSBRNA2G00115206001	GSBRNA2G00115206001	chrC04:26635738-26638091	UP	PC2	OK	3.8262	140.202	5.19545	6.65049	5e-05	0.00746503	yes
GSBRNA2T00008834001	BnaC05g08260D	GSBRNA2G00008834001	GSBRNA2G00008834001	chrC05:4337958-4338465	UP	PC2	OK	2.709	100.229	5.20939	4.51518	0.00015	0.0174243	yes
GSBRNA2T00104170001	BnaC09g44510D	GSBRNA2G00104170001	GSBRNA2G00104170001	chrC09:45288733-45291079	UP	PC2	OK	0.363883	13.4876	5.21201	4.71047	0.0001	0.0129792	yes
GSBRNA2T00017053001	BnaA01g36400D	GSBRNA2G00017053001	GSBRNA2G00017053001	chrA01_random:1960991-1965651	UP	PC2	OK	0.597549	22.2572	5.21907	5.59827	5e-05	0.00746503	yes
GSBRNA2T00061111001	BnaC03g60370D	GSBRNA2G00061111001	GSBRNA2G00061111001	chrC03:49558760-49561334	UP	PC2	OK	0.637905	23.8048	5.22176	5.40685	5e-05	0.00746503	yes
GSBRNA2T00124091001	BnaC04g19100D	GSBRNA2G00124091001	GSBRNA2G00124091001	chrC04:19276819-19278348	UP	PC2	OK	0.893868	33.3967	5.2235	4.59522	0.0002	0.021826	yes
GSBRNA2T00142849001	BnaC07g25300D	GSBRNA2G00142849001	GSBRNA2G00142849001	chrC07:31457934-31459374	UP	PC2	OK	6.28887	235.015	5.22381	7.1796	5e-05	0.00746503	yes
GSBRNA2T00079392001	BnaA05g25900D	GSBRNA2G00079392001	GSBRNA2G00079392001	chrA05:19072075-19074317	UP	PC2	OK	3.01579	112.813	5.22526	6.50595	5e-05	0.00746503	yes
GSBRNA2T00135745001	BnaA10g20620D	GSBRNA2G00135745001	GSBRNA2G00135745001	chrA10:14361103-14364245	UP	PC2	OK	0.991541	37.1203	5.22639	6.1439	5e-05	0.00746503	yes
GSBRNA2T00099032001	BnaA07g18750D	GSBRNA2G00099032001	GSBRNA2G00099032001	chrA07:15212495-15213819	UP	PC2	OK	2.59599	97.2938	5.22799	5.6212	5e-05	0.00746503	yes
GSBRNA2T00072265001	BnaA02g27790D	GSBRNA2G00072265001	GSBRNA2G00072265001	chrA02:20529416-20530169	UP	PC2	OK	1.61519	61.3235	5.24666	4.29813	0.00025	0.026	yes
GSBRNA2T00064167001	BnaA05g34110D	GSBRNA2G00064167001	GSBRNA2G00064167001	chrA05:23031774-23037597	UP	PC2	OK	0.376666	14.3398	5.2506	4.90254	0.00015	0.0174243	yes
GSBRNA2T00113709001	BnaA03g38910D	GSBRNA2G00113709001	GSBRNA2G00113709001	chrA03:19347039-19349443	UP	PC2	OK	0.638005	24.3351	5.25333	4.69339	0.0002	0.021826	yes
GSBRNA2T00098523001	BnaA07g14690D	GSBRNA2G00098523001	GSBRNA2G00098523001	chrA07:12900228-12907775	UP	PC2	OK	0.208924	8.08537	5.27426	4.65648	0.00015	0.0174243	yes
GSBRNA2T00150081001	BnaC03g45950D	GSBRNA2G00150081001	GSBRNA2G00150081001	chrC03:30969615-30972158	UP	PC2	OK	0.593286	22.9638	5.27449	4.64299	0.00015	0.0174243	yes
GSBRNA2T00125192001	BnaC03g35490D	GSBRNA2G00125192001	GSBRNA2G00125192001	chrC03:21548269-21549696	UP	PC2	OK	7.52577	292.111	5.27853	6.82817	5e-05	0.00746503	yes
GSBRNA2T00091687001	BnaC04g02280D	GSBRNA2G00091687001	GSBRNA2G00091687001	chrC04:1749059-1749306	UP	PC2	OK	23.412	909.114	5.27914	4.56322	0.0001	0.0129792	yes
GSBRNA2T00151985001	BnaC02g04170D	GSBRNA2G00151985001	GSBRNA2G00151985001	chrC02:2121743-2125617	UP	PC2	OK	0.615395	24.0583	5.28888	5.7377	5e-05	0.00746503	yes
GSBRNA2T00044281001	BnaA03g48660D	GSBRNA2G00044281001	GSBRNA2G00044281001	chrA03:24953213-24953825	UP	PC2	OK	3.77294	147.991	5.29368	4.81827	0.0003	0.0299213	yes
GSBRNA2T00085465001	BnaC05g01430D	GSBRNA2G00085465001	GSBRNA2G00085465001	chrC05:746688-748532	UP	PC2	OK	6.03372	237.328	5.29769	6.70148	5e-05	0.00746503	yes
GSBRNA2T00150685001	BnaA08g18330D	GSBRNA2G00150685001	GSBRNA2G00150685001	chrA08:14366607-14368376	UP	PC2	OK	10.7432	423.318	5.30024	6.37986	5e-05	0.00746503	yes
GSBRNA2T00131351001	BnaA01g09410D	GSBRNA2G00131351001	GSBRNA2G00131351001	chrA01:4607771-4608290	UP	PC2	OK	4.87138	192.488	5.3043	5.56082	5e-05	0.00746503	yes
GSBRNA2T00048429001	BnaA05g16950D	GSBRNA2G00048429001	GSBRNA2G00048429001	chrA05:11738028-11740890	UP	PC2	OK	0.861202	34.031	5.30436	5.23596	0.0001	0.0129792	yes
GSBRNA2T00032154001	BnaC05g29750D	GSBRNA2G00032154001	GSBRNA2G00032154001	chrC05:28658311-28661206	UP	PC2	OK	0.942286	37.3796	5.30994	5.69837	5e-05	0.00746503	yes
GSBRNA2T00049666001	BnaC06g31750D	GSBRNA2G00049666001	GSBRNA2G00049666001	chrC06:32205319-32205690	UP	PC2	OK	18.1704	722.473	5.31328	5.82221	5e-05	0.00746503	yes
GSBRNA2T00007840001	BnaCnng23280D	GSBRNA2G00007840001	GSBRNA2G00007840001	chrCnn_random:21839172-21839727	UP	PC2	OK	2.20204	87.7468	5.31644	4.26439	0.00015	0.0174243	yes
GSBRNA2T00053336001	BnaA04g27260D	GSBRNA2G00053336001	GSBRNA2G00053336001	chrA04_random:13561-14962	UP	PC2	OK	0.732472	29.4161	5.32769	4.76514	0.0002	0.021826	yes
GSBRNA2T00089606001	BnaA08g27230D	GSBRNA2G00089606001	GSBRNA2G00089606001	chrA08:18216369-18218234	UP	PC2	OK	11.0262	446.396	5.33932	6.10611	5e-05	0.00746503	yes
GSBRNA2T00015444001	BnaC03g54030D	GSBRNA2G00015444001	GSBRNA2G00015444001	chrC03:40739586-40742471	UP	PC2	OK	0.442634	18.0048	5.34612	4.59661	0.0001	0.0129792	yes
GSBRNA2T00009850001	BnaA09g02340D	GSBRNA2G00009850001	GSBRNA2G00009850001	chrA09:1191116-1191977	UP	PC2	OK	3.85246	156.841	5.34738	5.4447	5e-05	0.00746503	yes
GSBRNA2T00086320001	BnaC01g27710D	GSBRNA2G00086320001	GSBRNA2G00086320001	chrC01:25347034-25348589	UP	PC2	OK	1.35144	55.0399	5.34791	5.93824	5e-05	0.00746503	yes
GSBRNA2T00071611001	BnaC03g34350D	GSBRNA2G00071611001	GSBRNA2G00071611001	chrC03:20837015-20839335	UP	PC2	OK	4.20086	172.343	5.35845	6.81548	5e-05	0.00746503	yes
GSBRNA2T00081068001	BnaA02g04170D	GSBRNA2G00081068001	GSBRNA2G00081068001	chrA02:1865798-1868113	UP	PC2	OK	1.03045	42.659	5.37151	6.30058	5e-05	0.00746503	yes
GSBRNA2T00021776001	BnaA04g05320D	GSBRNA2G00021776001	GSBRNA2G00021776001	chrA04:4106721-4109488	UP	PC2	OK	1.76763	73.7897	5.38353	6.25951	5e-05	0.00746503	yes
GSBRNA2T00095567001	BnaC09g21050D	GSBRNA2G00095567001	GSBRNA2G00095567001	chrC09:18347822-18349647	UP	PC2	OK	0.72121	30.1069	5.38353	4.97394	0.00015	0.0174243	yes
GSBRNA2T00026681001	BnaCnng04950D	GSBRNA2G00026681001	GSBRNA2G00026681001	chrCnn_random:4526491-4526845	UP	PC2	OK	5.30235	221.991	5.38773	4.42417	5e-05	0.00746503	yes
GSBRNA2T00071549001	BnaC03g33860D	GSBRNA2G00071549001	GSBRNA2G00071549001	chrC03:20600155-20601719	UP	PC2	OK	1.7606	73.9435	5.39229	5.69035	5e-05	0.00746503	yes
GSBRNA2T00154297001	BnaA10g15570D	GSBRNA2G00154297001	GSBRNA2G00154297001	chrA10:12053350-12055831	UP	PC2	OK	7.82992	329.291	5.39422	6.19364	5e-05	0.00746503	yes
GSBRNA2T00144446001	BnaA06g30420D	GSBRNA2G00144446001	GSBRNA2G00144446001	chrA06:20549606-20551397	UP	PC2	OK	9.82092	415.066	5.40134	6.54071	5e-05	0.00746503	yes
GSBRNA2T00154052001	BnaA05g20840D	GSBRNA2G00154052001	GSBRNA2G00154052001	chrA05:16175496-16177949	UP	PC2	OK	0.536118	22.6903	5.40338	4.53231	0.0001	0.0129792	yes
GSBRNA2T00146548001	BnaA07g33190D	GSBRNA2G00146548001	GSBRNA2G00146548001	chrA07:22830688-22831453	UP	PC2	OK	2.20935	93.8657	5.40891	4.80891	0.0001	0.0129792	yes
GSBRNA2T00011949001	BnaCnng71770D	GSBRNA2G00011949001	GSBRNA2G00011949001	chrCnn_random:72040788-72042162	UP	PC2	OK	3.16831	135.892	5.4226	6.09723	5e-05	0.00746503	yes
GSBRNA2T00048242001	BnaCnng48740D	GSBRNA2G00048242001	GSBRNA2G00048242001	chrCnn_random:48120787-48122618	UP	PC2	OK	5.50144	236.362	5.42505	6.9484	5e-05	0.00746503	yes
GSBRNA2T00056333001	BnaA01g14010D	GSBRNA2G00056333001	GSBRNA2G00056333001	chrA01:7116843-7118074	UP	PC2	OK	15.2865	657.398	5.42644	6.26128	5e-05	0.00746503	yes
GSBRNA2T00052781001	BnaA02g07920D	GSBRNA2G00052781001	GSBRNA2G00052781001	chrA02:3750092-3753377	UP	PC2	OK	1.60132	69.1393	5.43217	6.68935	5e-05	0.00746503	yes
GSBRNA2T00143224001	BnaA02g02970D	GSBRNA2G00143224001	GSBRNA2G00143224001	chrA02:1313417-1315459	UP	PC2	OK	0.78056	33.7344	5.43357	4.94989	0.00025	0.026	yes
GSBRNA2T00014247001	BnaC07g49180D	GSBRNA2G00014247001	GSBRNA2G00014247001	chrC07_random:1794300-1796090	UP	PC2	OK	5.14827	223.985	5.44317	6.92825	5e-05	0.00746503	yes
GSBRNA2T00061514001	BnaA06g19910D	GSBRNA2G00061514001	GSBRNA2G00061514001	chrA06:12609413-12612427	UP	PC2	OK	0.490518	21.3473	5.4436	4.66428	5e-05	0.00746503	yes
GSBRNA2T00112105001	BnaA03g27350D	GSBRNA2G00112105001	GSBRNA2G00112105001	chrA03:13488872-13489461	UP	PC2	OK	9.06791	394.913	5.44462	5.4432	5e-05	0.00746503	yes
GSBRNA2T00153606001	BnaC03g32670D	GSBRNA2G00153606001	GSBRNA2G00153606001	chrC03:20021785-20027056	UP	PC2	OK	0.347442	15.1832	5.44956	5.05091	0.00025	0.026	yes
GSBRNA2T00096788001	BnaA03g56990D	GSBRNA2G00096788001	GSBRNA2G00096788001	chrA03_random:950826-952038	UP	PC2	OK	0.803824	35.196	5.45239	4.95039	0.00015	0.0174243	yes
GSBRNA2T00054757001	BnaA06g35670D	GSBRNA2G00054757001	GSBRNA2G00054757001	chrA06:23426776-23427769	UP	PC2	OK	1.53453	67.2121	5.45285	4.94223	0.00025	0.026	yes
GSBRNA2T00150900001	BnaA08g16670D	GSBRNA2G00150900001	GSBRNA2G00150900001	chrA08:13501183-13504036	UP	PC2	OK	0.416485	18.2751	5.45547	5.1007	0.0003	0.0299213	yes
GSBRNA2T00019044001	BnaC03g22940D	GSBRNA2G00019044001	GSBRNA2G00019044001	chrC03:12717997-12719997	UP	PC2	OK	0.467282	20.5335	5.45754	4.73176	0.00015	0.0174243	yes
GSBRNA2T00074030001	BnaC04g00950D	GSBRNA2G00074030001	GSBRNA2G00074030001	chrC04:778955-780317	UP	PC2	OK	1.03002	45.3243	5.45955	4.65342	0.00025	0.026	yes
GSBRNA2T00024068001	BnaC04g43840D	GSBRNA2G00024068001	GSBRNA2G00024068001	chrC04:44098354-44102576	UP	PC2	OK	0.323106	14.2475	5.46256	4.92708	0.0001	0.0129792	yes
GSBRNA2T00022521001	BnaCnng75130D	GSBRNA2G00022521001	GSBRNA2G00022521001	chrCnn_random:76107204-76108909	UP	PC2	OK	3.39733	150.128	5.46564	6.50321	5e-05	0.00746503	yes
GSBRNA2T00116083001	BnaC01g16500D	GSBRNA2G00116083001	GSBRNA2G00116083001	chrC01:11313530-11314792	UP	PC2	OK	11.3081	501.163	5.46986	6.50365	5e-05	0.00746503	yes
GSBRNA2T00070219001	BnaA02g13590D	GSBRNA2G00070219001	GSBRNA2G00070219001	chrA02:7458165-7459260	UP	PC2	OK	0.812882	36.1861	5.47625	4.72943	0.00045	0.0426947	yes
GSBRNA2T00003959001	BnaC05g50860D	GSBRNA2G00003959001	GSBRNA2G00003959001	chrC05_random:1684787-1687953	UP	PC2	OK	0.455571	20.396	5.48447	5.05683	0.0003	0.0299213	yes
GSBRNA2T00121761001	BnaC08g21170D	GSBRNA2G00121761001	GSBRNA2G00121761001	chrC08:23753409-23754167	UP	PC2	OK	12.7221	571.749	5.48998	6.44099	5e-05	0.00746503	yes
GSBRNA2T00045562001	BnaCnng46510D	GSBRNA2G00045562001	GSBRNA2G00045562001	chrCnn_random:45837549-45840230	UP	PC2	OK	0.523984	23.5745	5.49156	4.92091	0.00015	0.0174243	yes
GSBRNA2T00150525001	BnaA10g00580D	GSBRNA2G00150525001	GSBRNA2G00150525001	chrA10:293367-294087	UP	PC2	OK	1.44773	65.427	5.49802	4.8628	0.0001	0.0129792	yes
GSBRNA2T00112086001	BnaA03g27540D	GSBRNA2G00112086001	GSBRNA2G00112086001	chrA03:13552850-13555231	UP	PC2	OK	2.82849	127.869	5.49849	6.6321	5e-05	0.00746503	yes
GSBRNA2T00130944001	BnaC01g02960D	GSBRNA2G00130944001	GSBRNA2G00130944001	chrC01:1544537-1545293	UP	PC2	OK	1.78973	81.1754	5.50323	5.11934	0.00015	0.0174243	yes
GSBRNA2T00064118001	BnaA05g33680D	GSBRNA2G00064118001	GSBRNA2G00064118001	chrA05:22736815-22737232	UP	PC2	OK	12.8044	585.547	5.51507	5.88221	5e-05	0.00746503	yes
GSBRNA2T00016586001	BnaC02g44910D	GSBRNA2G00016586001	GSBRNA2G00016586001	chrC02_random:703214-707021	UP	PC2	OK	0.46571	21.4677	5.52659	5.26203	0.00025	0.026	yes
GSBRNA2T00003714001	BnaA03g58450D	GSBRNA2G00003714001	GSBRNA2G00003714001	chrA03_random:1686387-1689592	UP	PC2	OK	3.5186	162.891	5.53276	6.96459	5e-05	0.00746503	yes
GSBRNA2T00086218001	BnaCnng14580D	GSBRNA2G00086218001	GSBRNA2G00086218001	chrCnn_random:13512548-13513348	UP	PC2	OK	3.99118	184.892	5.53372	6.1105	5e-05	0.00746503	yes
GSBRNA2T00012909001	BnaA02g08480D	GSBRNA2G00012909001	GSBRNA2G00012909001	chrA02:4133018-4137651	UP	PC2	OK	1.97906	91.6805	5.53373	6.9919	5e-05	0.00746503	yes
GSBRNA2T00008748001	BnaAnng12170D	GSBRNA2G00008748001	GSBRNA2G00008748001	chrAnn_random:13184824-13189220	UP	PC2	OK	0.447188	20.7463	5.53583	4.92306	0.0002	0.021826	yes
GSBRNA2T00059979001	BnaA08g19130D	GSBRNA2G00059979001	GSBRNA2G00059979001	chrA08:14752756-14753110	UP	PC2	OK	3.96866	184.821	5.54133	4.31313	0.0001	0.0129792	yes
GSBRNA2T00125437001	BnaA06g15820D	GSBRNA2G00125437001	GSBRNA2G00125437001	chrA06:8684158-8684921	UP	PC2	OK	11.0236	513.463	5.5416	6.38988	5e-05	0.00746503	yes
GSBRNA2T00099470001	BnaA07g22480D	GSBRNA2G00099470001	GSBRNA2G00099470001	chrA07:17137950-17143065	UP	PC2	OK	0.36783	17.1423	5.54238	5.29784	0.0002	0.021826	yes
GSBRNA2T00100059001	BnaC07g45470D	GSBRNA2G00100059001	GSBRNA2G00100059001	chrC07:43528788-43530787	UP	PC2	OK	0.545823	25.4891	5.54531	4.7203	5e-05	0.00746503	yes
GSBRNA2T00098662001	BnaA07g15740D	GSBRNA2G00098662001	GSBRNA2G00098662001	chrA07:13520757-13522371	UP	PC2	OK	2.26355	106.167	5.5516	6.54724	5e-05	0.00746503	yes
GSBRNA2T00101250001	BnaC01g33660D	GSBRNA2G00101250001	GSBRNA2G00101250001	chrC01:32860482-32863240	UP	PC2	OK	0.484191	22.7431	5.55371	4.48481	0.0001	0.0129792	yes
GSBRNA2T00138909001	BnaA03g21590D	GSBRNA2G00138909001	GSBRNA2G00138909001	chrA03:10232719-10234788	UP	PC2	OK	5.85652	275.202	5.5543	6.48875	5e-05	0.00746503	yes
GSBRNA2T00038181001	BnaC04g51500D	GSBRNA2G00038181001	GSBRNA2G00038181001	chrC04:48806540-48807479	UP	PC2	OK	5.34099	251.177	5.55545	6.54652	5e-05	0.00746503	yes
GSBRNA2T00065186001	BnaAnng24780D	GSBRNA2G00065186001	GSBRNA2G00065186001	chrAnn_random:28652830-28655114	UP	PC2	OK	1.88089	88.7345	5.56	6.66316	5e-05	0.00746503	yes
GSBRNA2T00058434001	BnaA03g19250D	GSBRNA2G00058434001	GSBRNA2G00058434001	chrA03:9095209-9097196	UP	PC2	OK	0.558408	26.3852	5.56227	5.05604	0.0002	0.021826	yes
GSBRNA2T00091017001	BnaA08g03150D	GSBRNA2G00091017001	GSBRNA2G00091017001	chrA08:2569547-2571009	UP	PC2	OK	1.48332	70.2073	5.56472	4.79904	5e-05	0.00746503	yes
GSBRNA2T00113071001	BnaC06g29240D	GSBRNA2G00113071001	GSBRNA2G00113071001	chrC06:30267734-30268808	UP	PC2	OK	0.730413	34.7224	5.57101	4.62318	0.0003	0.0299213	yes
GSBRNA2T00025406001	BnaC09g38100D	GSBRNA2G00025406001	GSBRNA2G00025406001	chrC09:41110266-41112599	UP	PC2	OK	6.88748	328.976	5.57786	6.32757	5e-05	0.00746503	yes
GSBRNA2T00135080001	BnaC02g17750D	GSBRNA2G00135080001	GSBRNA2G00135080001	chrC02:13362886-13364063	UP	PC2	OK	0.912703	43.6253	5.57888	4.78978	0.0001	0.0129792	yes
GSBRNA2T00108951001	BnaC08g25550D	GSBRNA2G00108951001	GSBRNA2G00108951001	chrC08:27233984-27238109	UP	PC2	OK	1.10229	53.016	5.58785	6.54387	5e-05	0.00746503	yes
GSBRNA2T00113633001	BnaA03g39490D	GSBRNA2G00113633001	GSBRNA2G00113633001	chrA03:19704426-19706651	UP	PC2	OK	1.32122	63.6127	5.58938	5.57193	5e-05	0.00746503	yes
GSBRNA2T00128143001	BnaC08g03920D	GSBRNA2G00128143001	GSBRNA2G00128143001	chrC08:4093752-4094286	UP	PC2	OK	4.82697	232.435	5.58956	5.87939	5e-05	0.00746503	yes
GSBRNA2T00085370001	BnaC05g00650D	GSBRNA2G00085370001	GSBRNA2G00085370001	chrC05:348189-348909	UP	PC2	OK	1.76486	85.1477	5.59234	4.97292	0.0001	0.0129792	yes
GSBRNA2T00071362001	BnaC06g14040D	GSBRNA2G00071362001	GSBRNA2G00071362001	chrC06:16889001-16890615	UP	PC2	OK	3.60895	174.294	5.5938	6.822	5e-05	0.00746503	yes
GSBRNA2T00132757001	BnaA05g02520D	GSBRNA2G00132757001	GSBRNA2G00132757001	chrA05:1384992-1386814	UP	PC2	OK	1.54887	74.8055	5.59386	4.95695	0.0002	0.021826	yes
GSBRNA2T00063187001	BnaC06g12590D	GSBRNA2G00063187001	GSBRNA2G00063187001	chrC06:15163559-15166457	UP	PC2	OK	0.356767	17.2354	5.59425	5.02071	5e-05	0.00746503	yes
GSBRNA2T00101294001	BnaC01g33860D	GSBRNA2G00101294001	GSBRNA2G00101294001	chrC01:33064622-33067890	UP	PC2	OK	1.57566	76.5618	5.6026	6.68382	5e-05	0.00746503	yes
GSBRNA2T00081382001	BnaA02g04760D	GSBRNA2G00081382001	GSBRNA2G00081382001	chrA02:2113033-2114146	UP	PC2	OK	3.37921	164.516	5.6054	5.87081	5e-05	0.00746503	yes
GSBRNA2T00030817001	BnaA02g26540D	GSBRNA2G00030817001	GSBRNA2G00030817001	chrA02:19586983-19589684	UP	PC2	OK	1.04497	50.8897	5.60584	5.20371	0.0002	0.021826	yes
GSBRNA2T00006022001	BnaAnng03110D	GSBRNA2G00006022001	GSBRNA2G00006022001	chrAnn_random:2479088-2480144	UP	PC2	OK	1.18725	57.8537	5.60672	5.13494	0.0001	0.0129792	yes
GSBRNA2T00109746001	BnaA06g21100D	GSBRNA2G00109746001	GSBRNA2G00109746001	chrA06:14654726-14655146	UP	PC2	OK	3.8058	185.875	5.60999	5.20711	0.0001	0.0129792	yes
GSBRNA2T00005576001	BnaA01g26480D	GSBRNA2G00005576001	GSBRNA2G00005576001	chrA01:18549643-18553027	UP	PC2	OK	0.795449	38.887	5.61137	6.09109	5e-05	0.00746503	yes
GSBRNA2T00092678001	BnaA03g50770D	GSBRNA2G00092678001	GSBRNA2G00092678001	chrA03:26372941-26375158	UP	PC2	OK	0.75697	37.0168	5.6118	5.63409	5e-05	0.00746503	yes
GSBRNA2T00067730001	BnaC05g10650D	GSBRNA2G00067730001	GSBRNA2G00067730001	chrC05:6125134-6127180	UP	PC2	OK	3.60877	176.814	5.61458	6.72023	5e-05	0.00746503	yes
GSBRNA2T00017356001	BnaCnng29100D	GSBRNA2G00017356001	GSBRNA2G00017356001	chrCnn_random:27570085-27572816	UP	PC2	OK	0.337401	16.5815	5.61896	4.96815	0.00025	0.026	yes
GSBRNA2T00077121001	BnaCnng60280D	GSBRNA2G00077121001	GSBRNA2G00077121001	chrCnn_random:60038806-60040960	UP	PC2	OK	2.93594	144.851	5.6246	6.79809	5e-05	0.00746503	yes
GSBRNA2T00068766001	BnaA09g14940D	GSBRNA2G00068766001	GSBRNA2G00068766001	chrA09:8657963-8659223	UP	PC2	OK	0.932146	46.0679	5.62706	5.48549	0.0001	0.0129792	yes
GSBRNA2T00055435001	BnaA02g30620D	GSBRNA2G00055435001	GSBRNA2G00055435001	chrA02:22119789-22122345	UP	PC2	OK	4.86519	240.763	5.62897	6.66305	5e-05	0.00746503	yes
GSBRNA2T00008436001	BnaC03g73850D	GSBRNA2G00008436001	GSBRNA2G00008436001	chrC03_random:1882002-1885293	UP	PC2	OK	0.386503	19.1778	5.63282	4.96608	0.0001	0.0129792	yes
GSBRNA2T00086855001	BnaA01g22900D	GSBRNA2G00086855001	GSBRNA2G00086855001	chrA01:15244579-15246305	UP	PC2	OK	0.703469	35.0294	5.63794	5.17148	0.00025	0.026	yes
GSBRNA2T00088645001	BnaA04g26890D	GSBRNA2G00088645001	GSBRNA2G00088645001	chrA04:19011277-19012195	UP	PC2	OK	6.06679	302.402	5.63939	6.72605	5e-05	0.00746503	yes
GSBRNA2T00100044001	BnaC07g45340D	GSBRNA2G00100044001	GSBRNA2G00100044001	chrC07:43470227-43474640	UP	PC2	OK	2.40905	120.593	5.64554	6.95914	5e-05	0.00746503	yes
GSBRNA2T00137442001	BnaA03g34960D	GSBRNA2G00137442001	GSBRNA2G00137442001	chrA03:17053224-17056487	UP	PC2	OK	0.53136	26.9146	5.66256	5.27719	5e-05	0.00746503	yes
GSBRNA2T00026279001	BnaC01g37680D	GSBRNA2G00026279001	GSBRNA2G00026279001	chrC01:36968831-36971523	UP	PC2	OK	6.70844	340.037	5.66357	6.30637	5e-05	0.00746503	yes
GSBRNA2T00078951001	BnaA10g07190D	GSBRNA2G00078951001	GSBRNA2G00078951001	chrA10:5649901-5650722	UP	PC2	OK	1.9114	96.9572	5.66465	5.3595	0.0004	0.0384759	yes
GSBRNA2T00101719001	BnaC05g35370D	GSBRNA2G00101719001	GSBRNA2G00101719001	chrC05:34656836-34657873	UP	PC2	OK	1.19371	60.6323	5.66656	5.09376	0.00015	0.0174243	yes
GSBRNA2T00141196001	BnaC04g09250D	GSBRNA2G00141196001	GSBRNA2G00141196001	chrC04:7005379-7007460	UP	PC2	OK	1.10826	56.414	5.66968	5.15578	0.00015	0.0174243	yes
GSBRNA2T00025698001	BnaC08g50140D	GSBRNA2G00025698001	GSBRNA2G00025698001	chrC08_random:4498766-4500967	UP	PC2	OK	0.791824	40.5439	5.67816	4.91295	0.0002	0.021826	yes
GSBRNA2T00111896001	BnaA03g29100D	GSBRNA2G00111896001	GSBRNA2G00111896001	chrA03:14139727-14142333	UP	PC2	OK	1.47903	75.9673	5.68266	6.64343	5e-05	0.00746503	yes
GSBRNA2T00016475001	BnaAnng13710D	GSBRNA2G00016475001	GSBRNA2G00016475001	chrAnn_random:14645653-14647511	UP	PC2	OK	3.69061	189.586	5.68285	6.80647	5e-05	0.00746503	yes
GSBRNA2T00153589001	BnaC03g32550D	GSBRNA2G00153589001	GSBRNA2G00153589001	chrC03:19975600-19978003	UP	PC2	OK	3.55141	182.456	5.68301	6.9656	5e-05	0.00746503	yes
GSBRNA2T00058379001	BnaA03g19650D	GSBRNA2G00058379001	GSBRNA2G00058379001	chrA03:9316135-9316572	UP	PC2	OK	17.6467	908.518	5.68604	6.61905	5e-05	0.00746503	yes
GSBRNA2T00133996001	BnaC08g05510D	GSBRNA2G00133996001	GSBRNA2G00133996001	chrC08:7393684-7395545	UP	PC2	OK	0.79205	40.9001	5.69037	4.97077	0.0001	0.0129792	yes
GSBRNA2T00137699001	BnaA03g32810D	GSBRNA2G00137699001	GSBRNA2G00137699001	chrA03:15839251-15842058	UP	PC2	OK	5.65339	292.02	5.69081	6.48809	5e-05	0.00746503	yes
GSBRNA2T00065059001	BnaCnng08650D	GSBRNA2G00065059001	GSBRNA2G00065059001	chrCnn_random:8087173-8087905	UP	PC2	OK	2.63889	136.883	5.69687	5.07604	0.0004	0.0384759	yes
GSBRNA2T00078774001	BnaA08g13410D	GSBRNA2G00078774001	GSBRNA2G00078774001	chrA08:11621550-11622840	UP	PC2	OK	2.15298	111.848	5.69906	5.02258	0.00015	0.0174243	yes
GSBRNA2T00065417001	BnaC02g06390D	GSBRNA2G00065417001	GSBRNA2G00065417001	chrC02:3417337-3419373	UP	PC2	OK	0.46207	24.1529	5.70794	5.03365	0.0003	0.0299213	yes
GSBRNA2T00020917001	BnaCnng31830D	GSBRNA2G00020917001	GSBRNA2G00020917001	chrCnn_random:30249218-30249483	UP	PC2	OK	23.6593	1239.92	5.71169	5.69577	5e-05	0.00746503	yes
GSBRNA2T00007829001	BnaC02g47960D	GSBRNA2G00007829001	GSBRNA2G00007829001	chrC02_random:4073097-4075518	UP	PC2	OK	1.42425	74.7051	5.71293	5.66147	5e-05	0.00746503	yes
GSBRNA2T00031936001	BnaC05g03710D	GSBRNA2G00031936001	GSBRNA2G00031936001	chrC05:1805020-1808250	UP	PC2	OK	0.576318	30.2714	5.71495	5.04502	0.00015	0.0174243	yes
GSBRNA2T00124570001	BnaC06g15410D	GSBRNA2G00124570001	GSBRNA2G00124570001	chrC06:18076976-18080931	UP	PC2	OK	0.483725	25.5898	5.72524	5.26598	0.0001	0.0129792	yes
GSBRNA2T00121876001	BnaA09g37510D	GSBRNA2G00121876001	GSBRNA2G00121876001	chrA09:26976173-26977760	UP	PC2	OK	2.97975	157.791	5.72668	5.69928	5e-05	0.00746503	yes
GSBRNA2T00064714001	BnaC04g00460D	GSBRNA2G00064714001	GSBRNA2G00064714001	chrC04:370686-372710	UP	PC2	OK	5.85478	311.846	5.73507	6.55995	5e-05	0.00746503	yes
GSBRNA2T00075915001	BnaCnng10780D	GSBRNA2G00075915001	GSBRNA2G00075915001	chrCnn_random:9953939-9957781	UP	PC2	OK	0.355467	18.9442	5.7359	5.09542	5e-05	0.00746503	yes
GSBRNA2T00126366001	BnaA04g03610D	GSBRNA2G00126366001	GSBRNA2G00126366001	chrA04:2458405-2460621	UP	PC2	OK	2.96522	158.582	5.74094	6.8622	5e-05	0.00746503	yes
GSBRNA2T00071612001	BnaC03g34360D	GSBRNA2G00071612001	GSBRNA2G00071612001	chrC03:20839388-20840047	UP	PC2	OK	2.36636	126.626	5.74177	5.24929	5e-05	0.00746503	yes
GSBRNA2T00017673001	BnaA08g29220D	GSBRNA2G00017673001	GSBRNA2G00017673001	chrA08_random:69466-72262	UP	PC2	OK	1.75756	94.1503	5.74332	6.55387	5e-05	0.00746503	yes
GSBRNA2T00037942001	BnaCnng41410D	GSBRNA2G00037942001	GSBRNA2G00037942001	chrCnn_random:40227123-40227543	UP	PC2	OK	5.4849	294.569	5.747	5.23048	0.0001	0.0129792	yes
GSBRNA2T00016719001	BnaCnng73190D	GSBRNA2G00016719001	GSBRNA2G00016719001	chrCnn_random:73683813-73684891	UP	PC2	OK	10.9523	589.67	5.7506	6.57762	5e-05	0.00746503	yes
GSBRNA2T00153670001	BnaC03g33160D	GSBRNA2G00153670001	GSBRNA2G00153670001	chrC03:20253717-20256112	UP	PC2	OK	0.590862	31.9162	5.75532	5.54157	0.0001	0.0129792	yes
GSBRNA2T00007569001	BnaC09g51360D	GSBRNA2G00007569001	GSBRNA2G00007569001	chrC09_random:502162-506944	UP	PC2	OK	3.87766	209.896	5.75835	5.80575	5e-05	0.00746503	yes
GSBRNA2T00092029001	BnaA08g04750D	GSBRNA2G00092029001	GSBRNA2G00092029001	chrA08:4558016-4559917	UP	PC2	OK	1.34365	72.8398	5.7605	5.82976	5e-05	0.00746503	yes
GSBRNA2T00093336001	BnaAnng31850D	GSBRNA2G00093336001	GSBRNA2G00093336001	chrAnn_random:36425122-36427929	UP	PC2	OK	0.838596	45.5329	5.76279	5.36908	0.00015	0.0174243	yes
GSBRNA2T00097760001	BnaC03g72420D	GSBRNA2G00097760001	GSBRNA2G00097760001	chrC03_random:705618-707609	UP	PC2	OK	9.73113	530.158	5.76767	6.06039	5e-05	0.00746503	yes
GSBRNA2T00132123001	BnaC06g18960D	GSBRNA2G00132123001	GSBRNA2G00132123001	chrC06:21314284-21317081	UP	PC2	OK	0.586257	32.1937	5.7791	5.26144	0.0002	0.021826	yes
GSBRNA2T00076418001	BnaA01g29830D	GSBRNA2G00076418001	GSBRNA2G00076418001	chrA01:20617654-20620584	UP	PC2	OK	5.98168	331.604	5.79277	6.62815	5e-05	0.00746503	yes
GSBRNA2T00087071001	BnaA10g03800D	GSBRNA2G00087071001	GSBRNA2G00087071001	chrA10:2024085-2027174	UP	PC2	OK	0.81425	45.1775	5.79399	6.19367	5e-05	0.00746503	yes
GSBRNA2T00023808001	BnaC05g39970D	GSBRNA2G00023808001	GSBRNA2G00023808001	chrC05:38307762-38310436	UP	PC2	OK	5.43714	302.066	5.79587	6.53498	5e-05	0.00746503	yes
GSBRNA2T00134749001	BnaC09g06650D	GSBRNA2G00134749001	GSBRNA2G00134749001	chrC09:4089007-4091216	UP	PC2	OK	0.736782	41.1382	5.8031	4.97966	0.00015	0.0174243	yes
GSBRNA2T00070572001	BnaA09g13690D	GSBRNA2G00070572001	GSBRNA2G00070572001	chrA09:7788430-7788670	UP	PC2	OK	86.8413	4864.21	5.80768	6.4336	5e-05	0.00746503	yes
GSBRNA2T00097432001	BnaAnng10550D	GSBRNA2G00097432001	GSBRNA2G00097432001	chrAnn_random:11467979-11469049	UP	PC2	OK	1.73365	97.579	5.81469	5.85473	5e-05	0.00746503	yes
GSBRNA2T00138784001	BnaA03g22710D	GSBRNA2G00138784001	GSBRNA2G00138784001	chrA03:10799440-10801830	UP	PC2	OK	1.27425	71.7643	5.81555	6.12413	5e-05	0.00746503	yes
GSBRNA2T00046506001	BnaA06g19700D	GSBRNA2G00046506001	GSBRNA2G00046506001	chrA06:12214163-12217050	UP	PC2	OK	0.34727	19.6079	5.81924	4.85813	0.0001	0.0129792	yes
GSBRNA2T00006585001	BnaC05g14670D	GSBRNA2G00006585001	GSBRNA2G00006585001	chrC05:8656458-8658208	UP	PC2	OK	0.559101	31.7383	5.82697	5.29654	5e-05	0.00746503	yes
GSBRNA2T00087683001	BnaA01g22700D	GSBRNA2G00087683001	GSBRNA2G00087683001	chrA01:15012168-15012396	UP	PC2	OK	21.6446	1230.71	5.82934	5.08243	0.00015	0.0174243	yes
GSBRNA2T00004423001	BnaC03g77110D	GSBRNA2G00004423001	GSBRNA2G00004423001	chrC03_random:5673744-5675889	UP	PC2	OK	1.20851	68.7646	5.83037	5.90289	5e-05	0.00746503	yes
GSBRNA2T00150427001	BnaA10g01390D	GSBRNA2G00150427001	GSBRNA2G00150427001	chrA10:738266-740715	UP	PC2	OK	2.76962	157.804	5.8323	6.49857	5e-05	0.00746503	yes
GSBRNA2T00117797001	BnaA09g19110D	GSBRNA2G00117797001	GSBRNA2G00117797001	chrA09:12016068-12017988	UP	PC2	OK	0.819884	46.8181	5.8355	5.45925	0.00015	0.0174243	yes
GSBRNA2T00032509001	BnaC03g70650D	GSBRNA2G00032509001	GSBRNA2G00032509001	chrC03:60268300-60271136	UP	PC2	OK	1.53982	87.9707	5.83619	6.66901	5e-05	0.00746503	yes
GSBRNA2T00076300001	BnaC05g48590D	GSBRNA2G00076300001	GSBRNA2G00076300001	chrC05:43015086-43020684	UP	PC2	OK	0.220341	12.6023	5.83781	5.16158	0.00015	0.0174243	yes
GSBRNA2T00009508001	BnaA09g04150D	GSBRNA2G00009508001	GSBRNA2G00009508001	chrA09:2070698-2071427	UP	PC2	OK	2.46742	141.199	5.83858	5.20612	0.0001	0.0129792	yes
GSBRNA2T00005599001	BnaA01g26320D	GSBRNA2G00005599001	GSBRNA2G00005599001	chrA01:18388708-18391231	UP	PC2	OK	0.598163	34.3776	5.84479	5.07786	0.00015	0.0174243	yes
GSBRNA2T00057320001	BnaA09g41420D	GSBRNA2G00057320001	GSBRNA2G00057320001	chrA09:28945071-28948675	UP	PC2	OK	0.967266	55.6354	5.84595	6.14197	5e-05	0.00746503	yes
GSBRNA2T00082682001	BnaC02g42230D	GSBRNA2G00082682001	GSBRNA2G00082682001	chrC02:44912864-44915189	UP	PC2	OK	0.543627	31.3333	5.84894	5.0987	5e-05	0.00746503	yes
GSBRNA2T00073954001	BnaA01g05340D	GSBRNA2G00073954001	GSBRNA2G00073954001	chrA01:2506614-2509194	UP	PC2	OK	0.424993	24.5337	5.85118	5.43083	0.00015	0.0174243	yes
GSBRNA2T00123616001	BnaC03g37910D	GSBRNA2G00123616001	GSBRNA2G00123616001	chrC03:23193115-23195975	UP	PC2	OK	5.04052	291.273	5.85265	6.5143	5e-05	0.00746503	yes
GSBRNA2T00094938001	BnaA08g03570D	GSBRNA2G00094938001	GSBRNA2G00094938001	chrA08:2899574-2900108	UP	PC2	OK	3.05948	176.82	5.85285	5.29087	0.0001	0.0129792	yes
GSBRNA2T00107791001	BnaC01g11000D	GSBRNA2G00107791001	GSBRNA2G00107791001	chrC01:6789782-6790301	UP	PC2	OK	3.79607	219.581	5.8541	5.11354	0.0002	0.021826	yes
GSBRNA2T00130773001	BnaC01g04350D	GSBRNA2G00130773001	GSBRNA2G00130773001	chrC01:2275873-2278006	UP	PC2	OK	1.72121	100.229	5.86374	6.39342	5e-05	0.00746503	yes
GSBRNA2T00024443001	BnaC03g17520D	GSBRNA2G00024443001	GSBRNA2G00024443001	chrC03:8957043-8960297	UP	PC2	OK	0.71258	41.5648	5.86617	5.35675	5e-05	0.00746503	yes
GSBRNA2T00052472001	BnaA09g51020D	GSBRNA2G00052472001	GSBRNA2G00052472001	chrA09:33632579-33635046	UP	PC2	OK	0.49921	29.2972	5.87497	5.46403	0.0001	0.0129792	yes
GSBRNA2T00081694001	BnaA06g09240D	GSBRNA2G00081694001	GSBRNA2G00081694001	chrA06:4990237-4992243	UP	PC2	OK	2.28833	135.026	5.8828	6.90128	5e-05	0.00746503	yes
GSBRNA2T00121277001	BnaA01g03090D	GSBRNA2G00121277001	GSBRNA2G00121277001	chrA01:1492366-1494367	UP	PC2	OK	2.07312	122.52	5.88507	6.41691	5e-05	0.00746503	yes
GSBRNA2T00121417001	BnaA01g01830D	GSBRNA2G00121417001	GSBRNA2G00121417001	chrA01:941867-942626	UP	PC2	OK	1.89412	112.217	5.88862	5.42255	0.0001	0.0129792	yes
GSBRNA2T00045084001	BnaA04g24900D	GSBRNA2G00045084001	GSBRNA2G00045084001	chrA04:18111650-18114109	UP	PC2	OK	0.587982	34.8357	5.88865	5.38947	0.0002	0.021826	yes
GSBRNA2T00153567001	BnaC03g32350D	GSBRNA2G00153567001	GSBRNA2G00153567001	chrC03:19884600-19887518	UP	PC2	OK	1.37413	81.7636	5.89487	6.60348	5e-05	0.00746503	yes
GSBRNA2T00129599001	BnaA09g34580D	GSBRNA2G00129599001	GSBRNA2G00129599001	chrA09:25318216-25322898	UP	PC2	OK	0.758244	45.1801	5.89688	6.13865	5e-05	0.00746503	yes
GSBRNA2T00055941001	BnaC03g62750D	GSBRNA2G00055941001	GSBRNA2G00055941001	chrC03:51995539-51996921	UP	PC2	OK	2.03716	121.611	5.89957	4.9962	0.0001	0.0129792	yes
GSBRNA2T00018283001	BnaC09g00590D	GSBRNA2G00018283001	GSBRNA2G00018283001	chrC09:293783-294242	UP	PC2	OK	2.69566	161.199	5.90206	5.57483	0.0003	0.0299213	yes
GSBRNA2T00004537001	BnaA08g11700D	GSBRNA2G00004537001	GSBRNA2G00004537001	chrA08:10533745-10535728	UP	PC2	OK	1.46609	88.4637	5.91504	5.75926	5e-05	0.00746503	yes
GSBRNA2T00008753001	BnaAnng12200D	GSBRNA2G00008753001	GSBRNA2G00008753001	chrAnn_random:13197917-13200091	UP	PC2	OK	1.06976	64.5861	5.91586	6.00574	5e-05	0.00746503	yes
GSBRNA2T00079391001	BnaA05g25890D	GSBRNA2G00079391001	GSBRNA2G00079391001	chrA05:19066481-19069161	UP	PC2	OK	4.92643	298.387	5.9205	6.51799	5e-05	0.00746503	yes
GSBRNA2T00123903001	BnaC03g39840D	GSBRNA2G00123903001	GSBRNA2G00123903001	chrC03:24856755-24858851	UP	PC2	OK	2.56209	155.247	5.9211	6.56828	5e-05	0.00746503	yes
GSBRNA2T00059182001	BnaC03g58650D	GSBRNA2G00059182001	GSBRNA2G00059182001	chrC03:47932195-47933972	UP	PC2	OK	1.21711	73.948	5.92499	6.14754	5e-05	0.00746503	yes
GSBRNA2T00129640001	BnaA03g02030D	GSBRNA2G00129640001	GSBRNA2G00129640001	chrA03:939751-941250	UP	PC2	OK	2.20051	133.748	5.92554	6.30211	5e-05	0.00746503	yes
GSBRNA2T00055652001	BnaCnng52120D	GSBRNA2G00055652001	GSBRNA2G00055652001	chrCnn_random:51573312-51573705	UP	PC2	OK	3.41991	208.032	5.9267	4.99738	0.0002	0.021826	yes
GSBRNA2T00034378001	BnaC03g76390D	GSBRNA2G00034378001	GSBRNA2G00034378001	chrC03_random:5028567-5029362	UP	PC2	OK	1.11877	68.1897	5.92957	4.83844	0.0001	0.0129792	yes
GSBRNA2T00103095001	BnaA08g23970D	GSBRNA2G00103095001	GSBRNA2G00103095001	chrA08:16932151-16934369	UP	PC2	OK	2.04657	124.752	5.92971	6.76451	5e-05	0.00746503	yes
GSBRNA2T00078573001	BnaC02g01620D	GSBRNA2G00078573001	GSBRNA2G00078573001	chrC02:659607-661469	UP	PC2	OK	2.69475	164.697	5.93352	6.61609	5e-05	0.00746503	yes
GSBRNA2T00115121001	BnaC04g25940D	GSBRNA2G00115121001	GSBRNA2G00115121001	chrC04:27173449-27177743	UP	PC2	OK	0.841086	51.4752	5.93548	6.25644	5e-05	0.00746503	yes
GSBRNA2T00126934001	BnaA08g08890D	GSBRNA2G00126934001	GSBRNA2G00126934001	chrA08:8613718-8614952	UP	PC2	OK	2.31681	142.168	5.93931	5.01442	5e-05	0.00746503	yes
GSBRNA2T00059842001	BnaC03g41680D	GSBRNA2G00059842001	GSBRNA2G00059842001	chrC03:26574668-26577368	UP	PC2	OK	0.628303	38.5574	5.93941	5.44599	0.00015	0.0174243	yes
GSBRNA2T00050923001	BnaAnng21170D	GSBRNA2G00050923001	GSBRNA2G00050923001	chrAnn_random:23550039-23552691	UP	PC2	OK	0.982205	60.6976	5.94947	6.44216	5e-05	0.00746503	yes
GSBRNA2T00128737001	BnaC07g19810D	GSBRNA2G00128737001	GSBRNA2G00128737001	chrC07:26565125-26566118	UP	PC2	OK	1.01043	62.6245	5.95369	4.94816	0.0001	0.0129792	yes
GSBRNA2T00066162001	BnaC03g26740D	GSBRNA2G00066162001	GSBRNA2G00066162001	chrC03:15296379-15298757	UP	PC2	OK	1.1236	69.6764	5.95446	6.38701	5e-05	0.00746503	yes
GSBRNA2T00029427001	BnaC01g29960D	GSBRNA2G00029427001	GSBRNA2G00029427001	chrC01:28368543-28370450	UP	PC2	OK	0.761203	47.247	5.9558	5.34625	5e-05	0.00746503	yes
GSBRNA2T00137501001	BnaA03g34410D	GSBRNA2G00137501001	GSBRNA2G00137501001	chrA03:16754313-16755968	UP	PC2	OK	2.78983	173.818	5.96126	6.65202	5e-05	0.00746503	yes
GSBRNA2T00145925001	BnaC09g03550D	GSBRNA2G00145925001	GSBRNA2G00145925001	chrC09:2044062-2044893	UP	PC2	OK	1.7887	111.448	5.96132	5.38089	0.0001	0.0129792	yes
GSBRNA2T00142075001	BnaA03g14480D	GSBRNA2G00142075001	GSBRNA2G00142075001	chrA03:6666240-6669454	UP	PC2	OK	0.541837	33.8084	5.96338	5.70301	0.00015	0.0174243	yes
GSBRNA2T00120948001	BnaA10g05950D	GSBRNA2G00120948001	GSBRNA2G00120948001	chrA10:4165809-4167704	UP	PC2	OK	0.455834	28.4651	5.96454	5.04704	0.0002	0.021826	yes
GSBRNA2T00105252001	BnaA06g06610D	GSBRNA2G00105252001	GSBRNA2G00105252001	chrA06:3562211-3562718	UP	PC2	OK	4.411	275.657	5.96563	5.19431	5e-05	0.00746503	yes
GSBRNA2T00132966001	BnaA05g00810D	GSBRNA2G00132966001	GSBRNA2G00132966001	chrA05:471115-475305	UP	PC2	OK	2.73876	171.206	5.96607	6.69331	5e-05	0.00746503	yes
GSBRNA2T00112084001	BnaA03g27560D	GSBRNA2G00112084001	GSBRNA2G00112084001	chrA03:13562108-13562743	UP	PC2	OK	4.36246	273.489	5.9702	6.0472	5e-05	0.00746503	yes
GSBRNA2T00114961001	BnaC02g11010D	GSBRNA2G00114961001	GSBRNA2G00114961001	chrC02:6390677-6393782	UP	PC2	OK	0.724113	45.541	5.97481	6.22224	5e-05	0.00746503	yes
GSBRNA2T00066886001	BnaAnng25230D	GSBRNA2G00066886001	GSBRNA2G00066886001	chrAnn_random:29253826-29255946	UP	PC2	OK	0.520252	32.9521	5.98502	5.47112	5e-05	0.00746503	yes
GSBRNA2T00042563001	BnaA04g27680D	GSBRNA2G00042563001	GSBRNA2G00042563001	chrA04_random:218842-220395	UP	PC2	OK	0.944247	60.2031	5.99453	5.1676	5e-05	0.00746503	yes
GSBRNA2T00156918001	BnaC07g36660D	GSBRNA2G00156918001	GSBRNA2G00156918001	chrC07:38634414-38637827	UP	PC2	OK	0.948026	60.6386	5.99917	6.28301	5e-05	0.00746503	yes
GSBRNA2T00140403001	BnaC03g06470D	GSBRNA2G00140403001	GSBRNA2G00140403001	chrC03:3114002-3114431	UP	PC2	OK	5.48778	351.411	6.0008	5.01415	5e-05	0.00746503	yes
GSBRNA2T00136391001	BnaA10g26020D	GSBRNA2G00136391001	GSBRNA2G00136391001	chrA10:16659270-16660991	UP	PC2	OK	1.65564	106.045	6.00115	6.22585	5e-05	0.00746503	yes
GSBRNA2T00120565001	BnaC02g39350D	GSBRNA2G00120565001	GSBRNA2G00120565001	chrC02:42281995-42284945	UP	PC2	OK	0.266543	17.0845	6.00218	5.14881	0.0001	0.0129792	yes
GSBRNA2T00071518001	BnaA03g53130D	GSBRNA2G00071518001	GSBRNA2G00071518001	chrA03:27788160-27792685	UP	PC2	OK	1.28733	82.5481	6.00278	7.18568	5e-05	0.00746503	yes
GSBRNA2T00041321001	BnaCnng05770D	GSBRNA2G00041321001	GSBRNA2G00041321001	chrCnn_random:5346171-5348294	UP	PC2	OK	5.87021	377.261	6.00601	6.31673	5e-05	0.00746503	yes
GSBRNA2T00046831001	BnaC09g52000D	GSBRNA2G00046831001	GSBRNA2G00046831001	chrC09_random:1247514-1249888	UP	PC2	OK	2.79968	180.33	6.00923	6.15981	5e-05	0.00746503	yes
GSBRNA2T00064675001	BnaA10g05640D	GSBRNA2G00064675001	GSBRNA2G00064675001	chrA10:3437742-3438667	UP	PC2	OK	2.83358	183.097	6.01384	6.21904	5e-05	0.00746503	yes
GSBRNA2T00035606001	BnaA06g13170D	GSBRNA2G00035606001	GSBRNA2G00035606001	chrA06:6893622-6895361	UP	PC2	OK	0.519672	33.991	6.03141	5.35939	0.0001	0.0129792	yes
GSBRNA2T00028596001	BnaA03g59650D	GSBRNA2G00028596001	GSBRNA2G00028596001	chrA03_random:3711565-3713635	UP	PC2	OK	0.909756	59.7092	6.03633	5.37152	0.0001	0.0129792	yes
GSBRNA2T00082473001	BnaCnng13510D	GSBRNA2G00082473001	GSBRNA2G00082473001	chrCnn_random:12263113-12265791	UP	PC2	OK	1.58252	103.877	6.03651	6.74591	5e-05	0.00746503	yes
GSBRNA2T00102084001	BnaA07g26840D	GSBRNA2G00102084001	GSBRNA2G00102084001	chrA07:19612216-19613302	UP	PC2	OK	0.53846	35.4188	6.03953	4.87037	0.0005	0.0471628	yes
GSBRNA2T00105340001	BnaA06g07350D	GSBRNA2G00105340001	GSBRNA2G00105340001	chrA06:3910318-3911914	UP	PC2	OK	1.16683	76.824	6.04089	6.11939	5e-05	0.00746503	yes
GSBRNA2T00153593001	BnaC03g32590D	GSBRNA2G00153593001	GSBRNA2G00153593001	chrC03:19989404-19990113	UP	PC2	OK	3.41428	225.052	6.04253	6.10885	5e-05	0.00746503	yes
GSBRNA2T00133481001	BnaC07g30310D	GSBRNA2G00133481001	GSBRNA2G00133481001	chrC07:34854462-34855444	UP	PC2	OK	3.36042	221.715	6.04392	5.76281	5e-05	0.00746503	yes
GSBRNA2T00113116001	BnaC02g28140D	GSBRNA2G00113116001	GSBRNA2G00113116001	chrC02:26444382-26445280	UP	PC2	OK	2.1404	141.683	6.04865	5.82826	5e-05	0.00746503	yes
GSBRNA2T00137338001	BnaA03g35840D	GSBRNA2G00137338001	GSBRNA2G00137338001	chrA03:17499785-17502483	UP	PC2	OK	0.577361	38.5195	6.05997	5.61444	0.00025	0.026	yes
GSBRNA2T00021941001	BnaC04g48730D	GSBRNA2G00021941001	GSBRNA2G00021941001	chrC04:47239159-47241726	UP	PC2	OK	0.563008	37.6074	6.06172	5.34335	0.0003	0.0299213	yes
GSBRNA2T00039631001	BnaCnng42690D	GSBRNA2G00039631001	GSBRNA2G00039631001	chrCnn_random:41740410-41742712	UP	PC2	OK	0.504885	33.8151	6.06557	5.88589	0.0001	0.0129792	yes
GSBRNA2T00057413001	BnaA09g47760D	GSBRNA2G00057413001	GSBRNA2G00057413001	chrA09:32145667-32146174	UP	PC2	OK	6.87733	464.834	6.07872	5.94073	5e-05	0.00746503	yes
GSBRNA2T00053804001	BnaC09g22170D	GSBRNA2G00053804001	GSBRNA2G00053804001	chrC09:19459400-19462525	UP	PC2	OK	3.1468	213.1	6.0815	6.71749	5e-05	0.00746503	yes
GSBRNA2T00099054001	BnaA07g18960D	GSBRNA2G00099054001	GSBRNA2G00099054001	chrA07:15274873-15277625	UP	PC2	OK	1.32338	89.6366	6.08179	6.16308	5e-05	0.00746503	yes
GSBRNA2T00023642001	BnaA03g58460D	GSBRNA2G00023642001	GSBRNA2G00023642001	chrA03_random:1696868-1700308	UP	PC2	OK	0.822545	56.6731	6.10643	6.57789	5e-05	0.00746503	yes
GSBRNA2T00070573001	BnaA09g13680D	GSBRNA2G00070573001	GSBRNA2G00070573001	chrA09:7785550-7786049	UP	PC2	OK	5.57278	387.012	6.11784	6.01067	5e-05	0.00746503	yes
GSBRNA2T00138908001	BnaA03g21600D	GSBRNA2G00138908001	GSBRNA2G00138908001	chrA03:10239150-10239801	UP	PC2	OK	3.05101	212.74	6.12366	5.98735	5e-05	0.00746503	yes
GSBRNA2T00016772001	BnaA02g36510D	GSBRNA2G00016772001	GSBRNA2G00016772001	chrA02_random:996219-997101	UP	PC2	OK	3.44923	241.912	6.13207	6.08986	5e-05	0.00746503	yes
GSBRNA2T00041326001	BnaCnng05800D	GSBRNA2G00041326001	GSBRNA2G00041326001	chrCnn_random:5354794-5361680	UP	PC2	OK	1.63238	115.164	6.14056	6.55047	5e-05	0.00746503	yes
GSBRNA2T00147499001	BnaA06g26670D	GSBRNA2G00147499001	GSBRNA2G00147499001	chrA06:18318912-18319847	UP	PC2	OK	3.58966	255.644	6.15415	4.86823	0.0002	0.021826	yes
GSBRNA2T00144294001	BnaA06g29240D	GSBRNA2G00144294001	GSBRNA2G00144294001	chrA06:19969923-19971443	UP	PC2	OK	1.13378	81.2563	6.16327	5.4177	5e-05	0.00746503	yes
GSBRNA2T00005168001	BnaAnng11370D	GSBRNA2G00005168001	GSBRNA2G00005168001	chrAnn_random:12327596-12329902	UP	PC2	OK	2.83054	203.843	6.17024	6.17118	5e-05	0.00746503	yes
GSBRNA2T00146830001	BnaC02g31900D	GSBRNA2G00146830001	GSBRNA2G00146830001	chrC02:34338309-34339960	UP	PC2	OK	2.21616	159.815	6.1722	5.07	0.0001	0.0129792	yes
GSBRNA2T00089546001	BnaCnng64550D	GSBRNA2G00089546001	GSBRNA2G00089546001	chrCnn_random:64319926-64322246	UP	PC2	OK	0.979273	71.5078	6.19025	6.53486	5e-05	0.00746503	yes
GSBRNA2T00025694001	BnaC08g50100D	GSBRNA2G00025694001	GSBRNA2G00025694001	chrC08_random:4485976-4489932	UP	PC2	OK	0.313944	23.1075	6.20171	5.64487	5e-05	0.00746503	yes
GSBRNA2T00077251001	BnaAnng07690D	GSBRNA2G00077251001	GSBRNA2G00077251001	chrAnn_random:7427276-7429367	UP	PC2	OK	0.955374	71.5152	6.22604	5.58097	5e-05	0.00746503	yes
GSBRNA2T00095197001	BnaA05g10500D	GSBRNA2G00095197001	GSBRNA2G00095197001	chrA05:5743578-5747863	UP	PC2	OK	0.553779	41.4541	6.22606	6.48951	5e-05	0.00746503	yes
GSBRNA2T00111935001	BnaA03g28740D	GSBRNA2G00111935001	GSBRNA2G00111935001	chrA03:14000826-14002404	UP	PC2	OK	2.78345	211.671	6.2488	6.65971	5e-05	0.00746503	yes
GSBRNA2T00111559001	BnaA03g31930D	GSBRNA2G00111559001	GSBRNA2G00111559001	chrA03:15420095-15421395	UP	PC2	OK	1.0275	78.7106	6.25935	5.42089	0.00035	0.0341387	yes
GSBRNA2T00148820001	BnaA03g08850D	GSBRNA2G00148820001	GSBRNA2G00148820001	chrA03:4014805-4015543	UP	PC2	OK	6.18734	475.955	6.26536	6.47966	5e-05	0.00746503	yes
GSBRNA2T00009018001	BnaC04g11500D	GSBRNA2G00009018001	GSBRNA2G00009018001	chrC04:8987934-8991938	UP	PC2	OK	0.481827	37.5549	6.28434	6.39939	5e-05	0.00746503	yes
GSBRNA2T00091526001	BnaC07g27480D	GSBRNA2G00091526001	GSBRNA2G00091526001	chrC07:32987070-32988476	UP	PC2	OK	0.953914	76.1788	6.31939	5.63335	0.0003	0.0299213	yes
GSBRNA2T00093597001	BnaA02g27380D	GSBRNA2G00093597001	GSBRNA2G00093597001	chrA02:20184060-20186383	UP	PC2	OK	1.4069	112.887	6.32621	6.36066	5e-05	0.00746503	yes
GSBRNA2T00128546001	BnaC07g18740D	GSBRNA2G00128546001	GSBRNA2G00128546001	chrC07:25406272-25407506	UP	PC2	OK	3.30723	267.453	6.33752	6.12679	5e-05	0.00746503	yes
GSBRNA2T00098887001	BnaA07g17460D	GSBRNA2G00098887001	GSBRNA2G00098887001	chrA07:14618299-14618999	UP	PC2	OK	4.62403	382.127	6.36876	7.82927	5e-05	0.00746503	yes
GSBRNA2T00049050001	BnaC06g23370D	GSBRNA2G00049050001	GSBRNA2G00049050001	chrC06:25252072-25257113	UP	PC2	OK	0.20409	19.924	6.60916	5.89425	0.0003	0.0299213	yes
GSBRNA2T00090546001	BnaC08g40000D	GSBRNA2G00090546001	GSBRNA2G00090546001	chrC08:35413816-35416638	UP	PC2	OK	0.405078	42.4325	6.71082	5.50644	0.0001	0.0129792	yes

## Sheet: UP VS PC5
test_id	Bna_gene_id	gene_id	gene	locus	sample_1	sample_2	status	value_1	value_2	log2(fold_change)	test_stat	p_value	q_value	significant
GSBRNA2T00069041001	BnaC02g00130D	GSBRNA2G00069041001	GSBRNA2G00069041001	chrC02:33252-35278	UP	PC5	OK	9.59224	1.34849	-2.83052	-2.98529	0.0002	0.0176378	yes
GSBRNA2T00070630001	BnaA09g13300D	GSBRNA2G00070630001	GSBRNA2G00070630001	chrA09:7342299-7344144	UP	PC5	OK	34.4526	8.64118	-1.99532	-3.01119	5e-05	0.0057242	yes
GSBRNA2T00019633001	BnaCnng30450D	GSBRNA2G00019633001	GSBRNA2G00019633001	chrCnn_random:28963812-28966966	UP	PC5	OK	14.2759	4.06707	-1.81152	-2.65871	0.0001	0.0100433	yes
GSBRNA2T00148964001	BnaA03g07740D	GSBRNA2G00148964001	GSBRNA2G00148964001	chrA03:3437115-3439760	UP	PC5	OK	20.5734	59.6019	1.53457	2.63509	0.00035	0.0284996	yes
GSBRNA2T00055929001	BnaC03g62800D	GSBRNA2G00055929001	GSBRNA2G00055929001	chrC03:52086799-52091108	UP	PC5	OK	11.6685	34.1061	1.54741	2.64374	5e-05	0.0057242	yes
GSBRNA2T00096006001	BnaA10g29660D	GSBRNA2G00096006001	GSBRNA2G00096006001	chrA10_random:1856429-1858119	UP	PC5	OK	10.3394	30.3297	1.55258	2.63038	0.00015	0.0137633	yes
GSBRNA2T00044572001	BnaC05g09840D	GSBRNA2G00044572001	GSBRNA2G00044572001	chrC05:5493257-5495571	UP	PC5	OK	21.0905	65.3823	1.6323	2.77324	5e-05	0.0057242	yes
GSBRNA2T00128813001	BnaC07g20290D	GSBRNA2G00128813001	GSBRNA2G00128813001	chrC07:26975422-26977948	UP	PC5	OK	16.8309	52.5397	1.6423	2.80814	5e-05	0.0057242	yes
GSBRNA2T00130956001	BnaC01g02870D	GSBRNA2G00130956001	GSBRNA2G00130956001	chrC01:1511473-1523983	UP	PC5	OK	1.77857	5.63312	1.66322	2.72854	0.00015	0.0137633	yes
GSBRNA2T00034354001	BnaAnng17740D	GSBRNA2G00034354001	GSBRNA2G00034354001	chrAnn_random:18721674-18729506	UP	PC5	OK	4.49816	14.2512	1.66368	2.82921	0.00015	0.0137633	yes
GSBRNA2T00140456001	BnaC03g06960D	GSBRNA2G00140456001	GSBRNA2G00140456001	chrC03:3315513-3318860	UP	PC5	OK	6.4148	20.8055	1.69749	2.82911	0.0001	0.0100433	yes
GSBRNA2T00052859001	BnaA10g10580D	GSBRNA2G00052859001	GSBRNA2G00052859001	chrA10:9009955-9011787	UP	PC5	OK	5.86549	19.2447	1.71414	2.67245	0.00035	0.0284996	yes
GSBRNA2T00107772001	BnaC01g11140D	GSBRNA2G00107772001	GSBRNA2G00107772001	chrC01:6928622-6930098	UP	PC5	OK	10.5246	34.7818	1.72457	2.82866	0.0001	0.0100433	yes
GSBRNA2T00033770001	BnaA08g30600D	GSBRNA2G00033770001	GSBRNA2G00033770001	chrA08_random:1606091-1607737	UP	PC5	OK	8.02902	26.6129	1.72883	2.6965	0.0004	0.0321514	yes
GSBRNA2T00057338001	BnaA09g41600D	GSBRNA2G00057338001	GSBRNA2G00057338001	chrA09:29038955-29041932	UP	PC5	OK	4.42898	14.85	1.74542	2.49038	0.0006	0.0462176	yes
GSBRNA2T00049312001	BnaA03g01150D	GSBRNA2G00049312001	GSBRNA2G00049312001	chrA03:549617-552620	UP	PC5	OK	2.84875	9.58079	1.74982	2.6367	0.00035	0.0284996	yes
GSBRNA2T00035434001	BnaA09g47100D	GSBRNA2G00035434001	GSBRNA2G00035434001	chrA09:31788784-31790531	UP	PC5	OK	6.89355	23.2701	1.75516	2.66609	0.0004	0.0321514	yes
GSBRNA2T00131539001	BnaA01g10780D	GSBRNA2G00131539001	GSBRNA2G00131539001	chrA01:5392561-5394801	UP	PC5	OK	10.3056	35.8398	1.79814	3.1376	0.00015	0.0137633	yes
GSBRNA2T00108084001	BnaC04g33430D	GSBRNA2G00108084001	GSBRNA2G00108084001	chrC04:35061282-35064864	UP	PC5	OK	5.03664	17.5878	1.80404	2.94512	5e-05	0.0057242	yes
GSBRNA2T00138114001	BnaC01g12360D	GSBRNA2G00138114001	GSBRNA2G00138114001	chrC01:7831974-7834255	UP	PC5	OK	36.793	129.145	1.81148	3.03174	5e-05	0.0057242	yes
GSBRNA2T00001953001	BnaA06g35470D	GSBRNA2G00001953001	GSBRNA2G00001953001	chrA06:23305119-23307528	UP	PC5	OK	12.6446	44.9656	1.8303	3.08919	5e-05	0.0057242	yes
GSBRNA2T00126852001	BnaA08g09560D	GSBRNA2G00126852001	GSBRNA2G00126852001	chrA08:9118332-9120819	UP	PC5	OK	10.654	39.1928	1.87919	3.19163	5e-05	0.0057242	yes
GSBRNA2T00140791001	BnaC03g09740D	GSBRNA2G00140791001	GSBRNA2G00140791001	chrC03:4686940-4689410	UP	PC5	OK	11.9567	44.1222	1.88369	3.14444	5e-05	0.0057242	yes
GSBRNA2T00016503001	BnaCnng28420D	GSBRNA2G00016503001	GSBRNA2G00016503001	chrCnn_random:26933801-26938640	UP	PC5	OK	1.62977	6.0627	1.89529	2.84116	0.0001	0.0100433	yes
GSBRNA2T00060780001	BnaC03g13600D	GSBRNA2G00060780001	GSBRNA2G00060780001	chrC03:6568308-6573493	UP	PC5	OK	3.73278	14.1526	1.92275	2.9204	5e-05	0.0057242	yes
GSBRNA2T00115339001	BnaC07g22030D	GSBRNA2G00115339001	GSBRNA2G00115339001	chrC07:28550782-28553655	UP	PC5	OK	21.1572	80.3387	1.92495	3.14714	5e-05	0.0057242	yes
GSBRNA2T00109355001	BnaC08g22570D	GSBRNA2G00109355001	GSBRNA2G00109355001	chrC08:25215897-25220432	UP	PC5	OK	3.59999	13.8887	1.94785	3.16773	5e-05	0.0057242	yes
GSBRNA2T00078146001	BnaA06g32020D	GSBRNA2G00078146001	GSBRNA2G00078146001	chrA06:21427806-21429648	UP	PC5	OK	3.95901	15.2773	1.94817	2.76893	0.0002	0.0176378	yes
GSBRNA2T00042766001	BnaA02g35880D	GSBRNA2G00042766001	GSBRNA2G00042766001	chrA02_random:590037-593386	UP	PC5	OK	9.30417	36.0274	1.95314	3.19824	5e-05	0.0057242	yes
GSBRNA2T00054536001	BnaCnng51430D	GSBRNA2G00054536001	GSBRNA2G00054536001	chrCnn_random:50860091-50862240	UP	PC5	OK	3.33803	13.1824	1.98154	2.8677	0.0002	0.0176378	yes
GSBRNA2T00151221001	BnaA03g41960D	GSBRNA2G00151221001	GSBRNA2G00151221001	chrA03:21074015-21079798	UP	PC5	OK	10.3255	42.2655	2.03327	3.37681	5e-05	0.0057242	yes
GSBRNA2T00048010001	BnaC08g46700D	GSBRNA2G00048010001	GSBRNA2G00048010001	chrC08_random:945064-946978	UP	PC5	OK	6.44799	26.5323	2.04083	3.2639	5e-05	0.0057242	yes
GSBRNA2T00076199001	BnaA07g07570D	GSBRNA2G00076199001	GSBRNA2G00076199001	chrA07:7849875-7852244	UP	PC5	OK	7.09922	29.7264	2.06601	2.80532	0.0005	0.0394897	yes
GSBRNA2T00141899001	BnaA03g16020D	GSBRNA2G00141899001	GSBRNA2G00141899001	chrA03:7407851-7409946	UP	PC5	OK	10.0111	42.678	2.09189	3.30205	5e-05	0.0057242	yes
GSBRNA2T00124454001	BnaA07g25350D	GSBRNA2G00124454001	GSBRNA2G00124454001	chrA07:18878319-18883851	UP	PC5	OK	1.99992	8.55014	2.096	2.83427	0.00035	0.0284996	yes
GSBRNA2T00039950001	BnaA01g06270D	GSBRNA2G00039950001	GSBRNA2G00039950001	chrA01:2902452-2904349	UP	PC5	OK	2.70092	11.6117	2.10406	2.54164	0.00055	0.0426956	yes
GSBRNA2T00064716001	BnaC04g00440D	GSBRNA2G00064716001	GSBRNA2G00064716001	chrC04:365363-366014	UP	PC5	OK	63.4709	280.919	2.14599	3.28788	5e-05	0.0057242	yes
GSBRNA2T00149293001	BnaA04g00410D	GSBRNA2G00149293001	GSBRNA2G00149293001	chrA04:240976-243984	UP	PC5	OK	44.192	196.268	2.15097	2.67918	0.00065	0.049534	yes
GSBRNA2T00107391001	BnaC05g33160D	GSBRNA2G00107391001	GSBRNA2G00107391001	chrC05:32659895-32660958	UP	PC5	OK	2.88103	12.9529	2.16862	2.66384	0.0004	0.0321514	yes
GSBRNA2T00000718001	BnaA06g24410D	GSBRNA2G00000718001	GSBRNA2G00000718001	chrA06:16997115-17000062	UP	PC5	OK	3.76865	17.015	2.17469	3.24363	5e-05	0.0057242	yes
GSBRNA2T00075294001	BnaA03g47910D	GSBRNA2G00075294001	GSBRNA2G00075294001	chrA03:24653637-24656658	UP	PC5	OK	16.5035	76.724	2.21691	3.39774	5e-05	0.0057242	yes
GSBRNA2T00139858001	BnaC08g16080D	GSBRNA2G00139858001	GSBRNA2G00139858001	chrC08:20257415-20259058	UP	PC5	OK	6.02996	28.4388	2.23764	3.22915	5e-05	0.0057242	yes
GSBRNA2T00116010001	BnaC01g17060D	GSBRNA2G00116010001	GSBRNA2G00116010001	chrC01:11677579-11679172	UP	PC5	OK	2.41828	11.6368	2.26664	2.8059	0.0006	0.0462176	yes
GSBRNA2T00137371001	BnaA03g35520D	GSBRNA2G00137371001	GSBRNA2G00137371001	chrA03:17345517-17348242	UP	PC5	OK	4.9724	24.6116	2.30732	3.61041	5e-05	0.0057242	yes
GSBRNA2T00137084001	BnaC02g22250D	GSBRNA2G00137084001	GSBRNA2G00137084001	chrC02:19100902-19101865	UP	PC5	OK	7.27479	36.1936	2.31476	3.48019	5e-05	0.0057242	yes
GSBRNA2T00141491001	BnaC03g51470D	GSBRNA2G00141491001	GSBRNA2G00141491001	chrC03:36041198-36046903	UP	PC5	OK	4.82477	24.5754	2.34868	3.93967	5e-05	0.0057242	yes
GSBRNA2T00049502001	BnaA09g40020D	GSBRNA2G00049502001	GSBRNA2G00049502001	chrA09:28207712-28209428	UP	PC5	OK	3.02157	15.422	2.35162	3.22194	0.0001	0.0100433	yes
GSBRNA2T00068566001	BnaA09g10210D	GSBRNA2G00068566001	GSBRNA2G00068566001	chrA09:5224630-5229616	UP	PC5	OK	1.19134	6.14879	2.36771	3.20066	0.00025	0.0211863	yes
GSBRNA2T00033610001	BnaCnng37520D	GSBRNA2G00033610001	GSBRNA2G00033610001	chrCnn_random:36012144-36013668	UP	PC5	OK	1.9991	10.3333	2.36987	2.97472	0.0004	0.0321514	yes
GSBRNA2T00075848001	BnaA03g11700D	GSBRNA2G00075848001	GSBRNA2G00075848001	chrA03:5260774-5264151	UP	PC5	OK	3.9313	20.3639	2.37293	3.45195	5e-05	0.0057242	yes
GSBRNA2T00152962001	BnaC02g15950D	GSBRNA2G00152962001	GSBRNA2G00152962001	chrC02:11600160-11603654	UP	PC5	OK	0.752484	3.94006	2.38848	2.66523	0.0006	0.0462176	yes
GSBRNA2T00032751001	BnaC09g11360D	GSBRNA2G00032751001	GSBRNA2G00032751001	chrC09:7929484-7936144	UP	PC5	OK	1.71683	9.16679	2.41667	3.58096	5e-05	0.0057242	yes
GSBRNA2T00060745001	BnaC03g13310D	GSBRNA2G00060745001	GSBRNA2G00060745001	chrC03:6446695-6449759	UP	PC5	OK	3.87078	20.8302	2.42798	3.54305	5e-05	0.0057242	yes
GSBRNA2T00145376001	BnaC08g00120D	GSBRNA2G00145376001	GSBRNA2G00145376001	chrC08:49305-53872	UP	PC5	OK	1.41081	7.72016	2.45211	3.40361	5e-05	0.0057242	yes
GSBRNA2T00097000001	BnaA01g30830D	GSBRNA2G00097000001	GSBRNA2G00097000001	chrA01:21042513-21043895	UP	PC5	OK	1.64014	9.0742	2.46795	2.65132	0.00065	0.049534	yes
GSBRNA2T00053011001	BnaC09g33280D	GSBRNA2G00053011001	GSBRNA2G00053011001	chrC09:36436819-36439515	UP	PC5	OK	2.35016	13.031	2.47111	3.10681	0.00025	0.0211863	yes
GSBRNA2T00150668001	BnaA08g18440D	GSBRNA2G00150668001	GSBRNA2G00150668001	chrA08:14431065-14431401	UP	PC5	OK	13.4592	76.7093	2.51081	2.82271	0.00065	0.049534	yes
GSBRNA2T00085280001	BnaC03g44780D	GSBRNA2G00085280001	GSBRNA2G00085280001	chrC03:29892346-29896303	UP	PC5	OK	1.28313	7.37446	2.52287	3.41829	5e-05	0.0057242	yes
GSBRNA2T00014805001	BnaC02g48610D	GSBRNA2G00014805001	GSBRNA2G00014805001	chrC02_random:4865612-4867355	UP	PC5	OK	1.98928	11.8201	2.57093	3.1719	0.00025	0.0211863	yes
GSBRNA2T00063754001	BnaCnng08080D	GSBRNA2G00063754001	GSBRNA2G00063754001	chrCnn_random:7469653-7473057	UP	PC5	OK	5.85659	35.2823	2.59081	4.05518	5e-05	0.0057242	yes
GSBRNA2T00094996001	BnaA08g03920D	GSBRNA2G00094996001	GSBRNA2G00094996001	chrA08:3231532-3233325	UP	PC5	OK	3.59182	22.1846	2.62677	3.78387	5e-05	0.0057242	yes
GSBRNA2T00122954001	BnaA10g05260D	GSBRNA2G00122954001	GSBRNA2G00122954001	chrA10:3001257-3005403	UP	PC5	OK	2.5778	16.0616	2.6394	3.78984	5e-05	0.0057242	yes
GSBRNA2T00047657001	BnaC03g63960D	GSBRNA2G00047657001	GSBRNA2G00047657001	chrC03:53450631-53452738	UP	PC5	OK	6.28816	39.3518	2.64572	4.02179	5e-05	0.0057242	yes
GSBRNA2T00056385001	BnaA01g14490D	GSBRNA2G00056385001	GSBRNA2G00056385001	chrA01:7306476-7308003	UP	PC5	OK	2.22798	13.9828	2.64985	3.26718	5e-05	0.0057242	yes
GSBRNA2T00056416001	BnaA09g11080D	GSBRNA2G00056416001	GSBRNA2G00056416001	chrA09:5704449-5711109	UP	PC5	OK	1.22999	7.83938	2.67209	3.72898	5e-05	0.0057242	yes
GSBRNA2T00076127001	BnaA05g32340D	GSBRNA2G00076127001	GSBRNA2G00076127001	chrA05:22135673-22138998	UP	PC5	OK	1.18342	7.65269	2.69301	3.1519	0.00055	0.0426956	yes
GSBRNA2T00019696001	BnaCnng30550D	GSBRNA2G00019696001	GSBRNA2G00019696001	chrCnn_random:29036251-29039848	UP	PC5	OK	6.67996	43.4711	2.70214	3.98618	5e-05	0.0057242	yes
GSBRNA2T00073863001	BnaC05g47160D	GSBRNA2G00073863001	GSBRNA2G00073863001	chrC05:42289742-42291766	UP	PC5	OK	1.78359	11.8328	2.72994	3.20376	0.00035	0.0284996	yes
GSBRNA2T00150246001	BnaA10g02860D	GSBRNA2G00150246001	GSBRNA2G00150246001	chrA10:1480358-1483999	UP	PC5	OK	0.83743	5.86563	2.80825	3.538	5e-05	0.0057242	yes
GSBRNA2T00055882001	BnaC03g27970D	GSBRNA2G00055882001	GSBRNA2G00055882001	chrC03:16339160-16341317	UP	PC5	OK	2.53682	18.0105	2.82775	3.87829	5e-05	0.0057242	yes
GSBRNA2T00009231001	BnaA05g19820D	GSBRNA2G00009231001	GSBRNA2G00009231001	chrA05:15246117-15249389	UP	PC5	OK	0.868474	6.2467	2.84654	3.23691	5e-05	0.0057242	yes
GSBRNA2T00153882001	BnaA05g22270D	GSBRNA2G00153882001	GSBRNA2G00153882001	chrA05:17024725-17030088	UP	PC5	OK	4.49564	32.4955	2.85364	4.65049	5e-05	0.0057242	yes
GSBRNA2T00122822001	BnaA10g04370D	GSBRNA2G00122822001	GSBRNA2G00122822001	chrA10:2298603-2301709	UP	PC5	OK	4.13167	29.9142	2.85604	3.83936	5e-05	0.0057242	yes
GSBRNA2T00093341001	BnaAnng31880D	GSBRNA2G00093341001	GSBRNA2G00093341001	chrAnn_random:36440984-36442424	UP	PC5	OK	2.20617	16.0705	2.86479	3.61567	5e-05	0.0057242	yes
GSBRNA2T00121425001	BnaA01g01750D	GSBRNA2G00121425001	GSBRNA2G00121425001	chrA01:912922-924258	UP	PC5	OK	1.20662	8.91119	2.88465	4.56875	5e-05	0.0057242	yes
GSBRNA2T00121376001	BnaA01g02230D	GSBRNA2G00121376001	GSBRNA2G00121376001	chrA01:1142698-1147072	UP	PC5	OK	6.85961	51.7418	2.91513	4.50149	5e-05	0.0057242	yes
GSBRNA2T00109882001	BnaA06g22030D	GSBRNA2G00109882001	GSBRNA2G00109882001	chrA06:15402997-15404567	UP	PC5	OK	1.55219	11.9299	2.94221	3.06068	0.00065	0.049534	yes
GSBRNA2T00045443001	BnaC09g47860D	GSBRNA2G00045443001	GSBRNA2G00045443001	chrC09:46983331-46985296	UP	PC5	OK	17.0425	134.346	2.97875	4.51592	5e-05	0.0057242	yes
GSBRNA2T00154770001	BnaA03g36390D	GSBRNA2G00154770001	GSBRNA2G00154770001	chrA03:17814355-17816156	UP	PC5	OK	7.3941	58.6597	2.98792	4.67857	5e-05	0.0057242	yes
GSBRNA2T00101740001	BnaC05g35510D	GSBRNA2G00101740001	GSBRNA2G00101740001	chrC05:34873172-34878384	UP	PC5	OK	2.77399	22.2471	3.00358	4.60446	5e-05	0.0057242	yes
GSBRNA2T00100301001	BnaC07g47300D	GSBRNA2G00100301001	GSBRNA2G00100301001	chrC07:44591927-44595165	UP	PC5	OK	0.740537	6.11398	3.04547	3.46799	0.0001	0.0100433	yes
GSBRNA2T00026392001	BnaC03g42260D	GSBRNA2G00026392001	GSBRNA2G00026392001	chrC03:27048428-27050334	UP	PC5	OK	6.38064	52.8643	3.05052	4.59091	5e-05	0.0057242	yes
GSBRNA2T00155183001	BnaC04g46690D	GSBRNA2G00155183001	GSBRNA2G00155183001	chrC04:45921785-45931498	UP	PC5	OK	2.64116	22.0833	3.06371	4.23696	5e-05	0.0057242	yes
GSBRNA2T00132968001	BnaA05g00800D	GSBRNA2G00132968001	GSBRNA2G00132968001	chrA05:467360-468011	UP	PC5	OK	35.1411	305.626	3.12054	4.93565	5e-05	0.0057242	yes
GSBRNA2T00031454001	BnaC07g33060D	GSBRNA2G00031454001	GSBRNA2G00031454001	chrC07:36390301-36396061	UP	PC5	OK	5.80242	53.1047	3.19411	4.61893	5e-05	0.0057242	yes
GSBRNA2T00079037001	BnaA10g06640D	GSBRNA2G00079037001	GSBRNA2G00079037001	chrA10:5094398-5095787	UP	PC5	OK	1.9679	18.0305	3.1957	3.81726	0.0001	0.0100433	yes
GSBRNA2T00067347001	BnaC09g21800D	GSBRNA2G00067347001	GSBRNA2G00067347001	chrC09:19037872-19040199	UP	PC5	OK	1.02914	9.43684	3.19686	3.29886	0.00055	0.0426956	yes
GSBRNA2T00090247001	BnaA04g12240D	GSBRNA2G00090247001	GSBRNA2G00090247001	chrA04:10419234-10422793	UP	PC5	OK	1.25768	11.9922	3.25327	4.0615	5e-05	0.0057242	yes
GSBRNA2T00074261001	BnaCnng59120D	GSBRNA2G00074261001	GSBRNA2G00074261001	chrCnn_random:58787830-58790301	UP	PC5	OK	0.651342	6.36065	3.28769	3.49534	0.00015	0.0137633	yes
GSBRNA2T00053102001	BnaC02g12030D	GSBRNA2G00053102001	GSBRNA2G00053102001	chrC02:7422997-7427787	UP	PC5	OK	5.88518	57.8994	3.29839	4.83278	5e-05	0.0057242	yes
GSBRNA2T00136918001	BnaC08g36500D	GSBRNA2G00136918001	GSBRNA2G00136918001	chrC08:33750555-33753773	UP	PC5	OK	5.61179	58.3506	3.37821	4.62153	5e-05	0.0057242	yes
GSBRNA2T00116783001	BnaA05g05550D	GSBRNA2G00116783001	GSBRNA2G00116783001	chrA05:2903352-2908788	UP	PC5	OK	2.33038	24.3972	3.38808	4.6175	5e-05	0.0057242	yes
GSBRNA2T00132340001	BnaC03g19130D	GSBRNA2G00132340001	GSBRNA2G00132340001	chrC03:9906507-9908826	UP	PC5	OK	2.37806	25.064	3.39776	3.50347	0.00015	0.0137633	yes
GSBRNA2T00123587001	BnaCnng02400D	GSBRNA2G00123587001	GSBRNA2G00123587001	chrCnn_random:2146397-2148586	UP	PC5	OK	0.968047	10.3224	3.41456	3.60292	0.0005	0.0394897	yes
GSBRNA2T00001337001	BnaA02g05410D	GSBRNA2G00001337001	GSBRNA2G00001337001	chrA02:2480806-2483472	UP	PC5	OK	3.3008	35.4006	3.42288	4.79519	5e-05	0.0057242	yes
GSBRNA2T00077447001	BnaC09g33580D	GSBRNA2G00077447001	GSBRNA2G00077447001	chrC09:36872443-36876313	UP	PC5	OK	2.93435	31.6694	3.43198	5.2496	5e-05	0.0057242	yes
GSBRNA2T00072371001	BnaA09g18340D	GSBRNA2G00072371001	GSBRNA2G00072371001	chrA09:11423248-11428344	UP	PC5	OK	2.11116	23.2883	3.4635	4.02315	5e-05	0.0057242	yes
GSBRNA2T00127193001	BnaC08g32950D	GSBRNA2G00127193001	GSBRNA2G00127193001	chrC08:31662579-31671855	UP	PC5	OK	0.279508	3.10356	3.47296	3.5106	0.00015	0.0137633	yes
GSBRNA2T00148620001	BnaA03g10620D	GSBRNA2G00148620001	GSBRNA2G00148620001	chrA03:4795742-4799004	UP	PC5	OK	4.07973	45.8483	3.49032	4.98647	5e-05	0.0057242	yes
GSBRNA2T00017259001	BnaCnng73470D	GSBRNA2G00017259001	GSBRNA2G00017259001	chrCnn_random:74071303-74072988	UP	PC5	OK	0.674933	7.59183	3.49163	3.66017	0.00025	0.0211863	yes
GSBRNA2T00057374001	BnaA09g47460D	GSBRNA2G00057374001	GSBRNA2G00057374001	chrA09:31990455-31992915	UP	PC5	OK	2.6635	30.281	3.50702	4.78117	5e-05	0.0057242	yes
GSBRNA2T00136137001	BnaA10g23880D	GSBRNA2G00136137001	GSBRNA2G00136137001	chrA10:15687854-15689806	UP	PC5	OK	10.6107	124.011	3.54688	5.07738	5e-05	0.0057242	yes
GSBRNA2T00096582001	BnaCnng66900D	GSBRNA2G00096582001	GSBRNA2G00096582001	chrCnn_random:66590503-66592591	UP	PC5	OK	4.04243	48.672	3.5898	5.18574	5e-05	0.0057242	yes
GSBRNA2T00073646001	BnaC02g13820D	GSBRNA2G00073646001	GSBRNA2G00073646001	chrC02:9142507-9146099	UP	PC5	OK	3.09143	38.4081	3.63506	5.2166	5e-05	0.0057242	yes
GSBRNA2T00105529001	BnaA06g08900D	GSBRNA2G00105529001	GSBRNA2G00105529001	chrA06:4822726-4825769	UP	PC5	OK	3.65531	45.4393	3.63588	5.10759	5e-05	0.0057242	yes
GSBRNA2T00145161001	BnaC08g01580D	GSBRNA2G00145161001	GSBRNA2G00145161001	chrC08:1220457-1225549	UP	PC5	OK	0.301625	3.76439	3.64159	3.57223	0.0002	0.0176378	yes
GSBRNA2T00009793001	BnaA09g02760D	GSBRNA2G00009793001	GSBRNA2G00009793001	chrA09:1408219-1411015	UP	PC5	OK	8.68176	109.206	3.65293	5.28822	5e-05	0.0057242	yes
GSBRNA2T00007279001	BnaC03g71790D	GSBRNA2G00007279001	GSBRNA2G00007279001	chrC03_random:334992-338193	UP	PC5	OK	2.34802	29.839	3.66768	4.81956	5e-05	0.0057242	yes
GSBRNA2T00043969001	BnaA02g35410D	GSBRNA2G00043969001	GSBRNA2G00043969001	chrA02_random:252434-255509	UP	PC5	OK	5.28999	68.0636	3.68555	5.36422	5e-05	0.0057242	yes
GSBRNA2T00028989001	BnaC06g18580D	GSBRNA2G00028989001	GSBRNA2G00028989001	chrC06:20929704-20932437	UP	PC5	OK	1.39585	18.0114	3.6897	4.64619	5e-05	0.0057242	yes
GSBRNA2T00146043001	BnaC09g04500D	GSBRNA2G00146043001	GSBRNA2G00146043001	chrC09:2573612-2575815	UP	PC5	OK	2.13693	27.8191	3.70247	5.00417	5e-05	0.0057242	yes
GSBRNA2T00073063001	BnaA08g20630D	GSBRNA2G00073063001	GSBRNA2G00073063001	chrA08:15497310-15498127	UP	PC5	OK	1.76419	23.5443	3.7383	3.7774	5e-05	0.0057242	yes
GSBRNA2T00076135001	BnaA05g32260D	GSBRNA2G00076135001	GSBRNA2G00076135001	chrA05:22116463-22119224	UP	PC5	OK	0.762711	10.4331	3.77389	3.99967	0.0001	0.0100433	yes
GSBRNA2T00018531001	BnaC01g39610D	GSBRNA2G00018531001	GSBRNA2G00018531001	chrC01:38241332-38243163	UP	PC5	OK	5.58931	79.117	3.82325	5.0177	5e-05	0.0057242	yes
GSBRNA2T00059448001	BnaA07g00870D	GSBRNA2G00059448001	GSBRNA2G00059448001	chrA07:614477-617853	UP	PC5	OK	7.69064	110.576	3.84579	5.48267	5e-05	0.0057242	yes
GSBRNA2T00150895001	BnaA08g16720D	GSBRNA2G00150895001	GSBRNA2G00150895001	chrA08:13517878-13521291	UP	PC5	OK	1.72967	25.1606	3.8626	5.3523	5e-05	0.0057242	yes
GSBRNA2T00078344001	BnaA09g43940D	GSBRNA2G00078344001	GSBRNA2G00078344001	chrA09:30284900-30288190	UP	PC5	OK	2.69417	39.214	3.86346	5.3346	5e-05	0.0057242	yes
GSBRNA2T00052820001	BnaA10g10880D	GSBRNA2G00052820001	GSBRNA2G00052820001	chrA10:9212153-9214941	UP	PC5	OK	1.99675	29.6117	3.89044	4.58175	5e-05	0.0057242	yes
GSBRNA2T00055780001	BnaC02g43880D	GSBRNA2G00055780001	GSBRNA2G00055780001	chrC02:45990312-45993085	UP	PC5	OK	0.649107	9.84321	3.9226	4.0316	5e-05	0.0057242	yes
GSBRNA2T00104151001	BnaC09g44650D	GSBRNA2G00104151001	GSBRNA2G00104151001	chrC09:45367915-45371109	UP	PC5	OK	1.3481	20.7916	3.947	4.93736	5e-05	0.0057242	yes
GSBRNA2T00009608001	BnaA09g04970D	GSBRNA2G00009608001	GSBRNA2G00009608001	chrA09:2446828-2448987	UP	PC5	OK	1.09287	16.8675	3.94805	4.62996	5e-05	0.0057242	yes
GSBRNA2T00099011001	BnaA07g18550D	GSBRNA2G00099011001	GSBRNA2G00099011001	chrA07:15089970-15093068	UP	PC5	OK	0.748879	11.6604	3.96074	4.10178	5e-05	0.0057242	yes
GSBRNA2T00122669001	BnaC02g12730D	GSBRNA2G00122669001	GSBRNA2G00122669001	chrC02:8102753-8105962	UP	PC5	OK	4.06432	63.9365	3.97555	5.60084	5e-05	0.0057242	yes
GSBRNA2T00142853001	BnaC07g25330D	GSBRNA2G00142853001	GSBRNA2G00142853001	chrC07:31475071-31477711	UP	PC5	OK	2.73985	46.0094	4.06976	5.23155	5e-05	0.0057242	yes
GSBRNA2T00059872001	BnaC03g41470D	GSBRNA2G00059872001	GSBRNA2G00059872001	chrC03:26429525-26431892	UP	PC5	OK	1.20738	20.3323	4.07382	5.15303	5e-05	0.0057242	yes
GSBRNA2T00076367001	BnaC03g58910D	GSBRNA2G00076367001	GSBRNA2G00076367001	chrC03:48164432-48165553	UP	PC5	OK	3.23927	54.6071	4.07535	4.45711	5e-05	0.0057242	yes
GSBRNA2T00125323001	BnaC03g34580D	GSBRNA2G00125323001	GSBRNA2G00125323001	chrC03:20973434-20975192	UP	PC5	OK	0.796686	13.6285	4.09648	4.2597	5e-05	0.0057242	yes
GSBRNA2T00059181001	BnaC03g58640D	GSBRNA2G00059181001	GSBRNA2G00059181001	chrC03:47923963-47924499	UP	PC5	OK	2.89356	51.5046	4.15379	3.64821	0.0006	0.0462176	yes
GSBRNA2T00098727001	BnaA07g16250D	GSBRNA2G00098727001	GSBRNA2G00098727001	chrA07:13817141-13818980	UP	PC5	OK	1.8469	32.9016	4.15498	4.25913	5e-05	0.0057242	yes
GSBRNA2T00145932001	BnaC09g03610D	GSBRNA2G00145932001	GSBRNA2G00145932001	chrC09:2060734-2060962	UP	PC5	OK	43.4045	788.204	4.18265	4.65419	5e-05	0.0057242	yes
GSBRNA2T00137360001	BnaA03g35630D	GSBRNA2G00137360001	GSBRNA2G00137360001	chrA03:17398863-17401047	UP	PC5	OK	1.24883	22.8174	4.19149	5.15345	5e-05	0.0057242	yes
GSBRNA2T00125190001	BnaC03g35500D	GSBRNA2G00125190001	GSBRNA2G00125190001	chrC03:21557259-21558509	UP	PC5	OK	4.53632	85.0624	4.22893	5.557	5e-05	0.0057242	yes
GSBRNA2T00096612001	BnaCnng19220D	GSBRNA2G00096612001	GSBRNA2G00096612001	chrCnn_random:17903979-17904866	UP	PC5	OK	15.2138	286.422	4.23469	6.03501	5e-05	0.0057242	yes
GSBRNA2T00120717001	BnaC02g38360D	GSBRNA2G00120717001	GSBRNA2G00120717001	chrC02:41340976-41342766	UP	PC5	OK	5.90728	112.857	4.25585	5.27396	5e-05	0.0057242	yes
GSBRNA2T00144552001	BnaA06g31290D	GSBRNA2G00144552001	GSBRNA2G00144552001	chrA06:21065185-21067780	UP	PC5	OK	2.28822	44.158	4.27038	5.37016	5e-05	0.0057242	yes
GSBRNA2T00011180001	BnaCnng71300D	GSBRNA2G00011180001	GSBRNA2G00011180001	chrCnn_random:71480283-71481422	UP	PC5	OK	2.66519	51.5294	4.27309	4.78066	5e-05	0.0057242	yes
GSBRNA2T00138676001	BnaA03g23580D	GSBRNA2G00138676001	GSBRNA2G00138676001	chrA03:11271408-11273915	UP	PC5	OK	0.9678	18.899	4.28746	5.06157	5e-05	0.0057242	yes
GSBRNA2T00018422001	BnaA09g00750D	GSBRNA2G00018422001	GSBRNA2G00018422001	chrA09:476937-477869	UP	PC5	OK	11.4009	223.054	4.29017	6.09435	5e-05	0.0057242	yes
GSBRNA2T00032039001	BnaC05g04600D	GSBRNA2G00032039001	GSBRNA2G00032039001	chrC05:2260658-2262854	UP	PC5	OK	1.78615	35.0045	4.29262	5.07868	5e-05	0.0057242	yes
GSBRNA2T00153833001	BnaA05g22710D	GSBRNA2G00153833001	GSBRNA2G00153833001	chrA05:17234252-17238108	UP	PC5	OK	0.586911	11.8589	4.33668	4.41275	5e-05	0.0057242	yes
GSBRNA2T00113509001	BnaA03g40500D	GSBRNA2G00113509001	GSBRNA2G00113509001	chrA03:20235011-20236815	UP	PC5	OK	2.57235	52.2802	4.34511	5.14445	5e-05	0.0057242	yes
GSBRNA2T00057950001	BnaA06g10890D	GSBRNA2G00057950001	GSBRNA2G00057950001	chrA06:5686670-5690302	UP	PC5	OK	0.556837	11.3582	4.35034	4.42946	5e-05	0.0057242	yes
GSBRNA2T00097050001	BnaCnng67100D	GSBRNA2G00097050001	GSBRNA2G00097050001	chrCnn_random:66785262-66786909	UP	PC5	OK	0.575851	11.8478	4.36278	3.79727	0.0005	0.0394897	yes
GSBRNA2T00020062001	BnaA06g40790D	GSBRNA2G00020062001	GSBRNA2G00020062001	chrA06_random:2182102-2184712	UP	PC5	OK	1.56595	34.1733	4.44776	5.96277	5e-05	0.0057242	yes
GSBRNA2T00090908001	BnaA02g11790D	GSBRNA2G00090908001	GSBRNA2G00090908001	chrA02:6182711-6184239	UP	PC5	OK	0.899555	19.8237	4.46187	4.49695	5e-05	0.0057242	yes
GSBRNA2T00150687001	BnaA08g18320D	GSBRNA2G00150687001	GSBRNA2G00150687001	chrA08:14362176-14363947	UP	PC5	OK	2.83271	64.0011	4.49784	5.32159	5e-05	0.0057242	yes
GSBRNA2T00156919001	BnaC07g36670D	GSBRNA2G00156919001	GSBRNA2G00156919001	chrC07:38642450-38646115	UP	PC5	OK	3.46293	79.3089	4.51742	5.9999	5e-05	0.0057242	yes
GSBRNA2T00049499001	BnaA09g39990D	GSBRNA2G00049499001	GSBRNA2G00049499001	chrA09:28193670-28194009	UP	PC5	OK	3.37877	77.8847	4.52677	3.69388	0.0005	0.0394897	yes
GSBRNA2T00041446001	BnaA02g09870D	GSBRNA2G00041446001	GSBRNA2G00041446001	chrA02:4950702-4954201	UP	PC5	OK	0.832036	19.2281	4.53042	4.78247	0.0001	0.0100433	yes
GSBRNA2T00065089001	BnaCnng08890D	GSBRNA2G00065089001	GSBRNA2G00065089001	chrCnn_random:8194479-8196157	UP	PC5	OK	0.695972	16.0929	4.53125	3.92254	0.00065	0.049534	yes
GSBRNA2T00006023001	BnaAnng03120D	GSBRNA2G00006023001	GSBRNA2G00006023001	chrAnn_random:2481793-2483609	UP	PC5	OK	0.680283	15.7526	4.53331	4.56748	5e-05	0.0057242	yes
GSBRNA2T00077003001	BnaA04g20340D	GSBRNA2G00077003001	GSBRNA2G00077003001	chrA04:15697498-15699770	UP	PC5	OK	4.17144	97.9438	4.55334	5.58145	5e-05	0.0057242	yes
GSBRNA2T00051169001	BnaA08g30830D	GSBRNA2G00051169001	GSBRNA2G00051169001	chrA08_random:1721573-1722322	UP	PC5	OK	3.96454	94.5227	4.57543	5.48805	5e-05	0.0057242	yes
GSBRNA2T00077283001	BnaA06g23180D	GSBRNA2G00077283001	GSBRNA2G00077283001	chrA06:16148590-16154160	UP	PC5	OK	0.177388	4.23856	4.57859	4.22723	0.00055	0.0426956	yes
GSBRNA2T00130027001	BnaA03g05250D	GSBRNA2G00130027001	GSBRNA2G00130027001	chrA03:2421017-2422758	UP	PC5	OK	0.995168	23.8449	4.5826	4.44675	5e-05	0.0057242	yes
GSBRNA2T00012629001	BnaC04g05270D	GSBRNA2G00012629001	GSBRNA2G00012629001	chrC04:3733319-3736868	UP	PC5	OK	2.12208	50.9472	4.58545	5.76853	5e-05	0.0057242	yes
GSBRNA2T00031591001	BnaC09g43110D	GSBRNA2G00031591001	GSBRNA2G00031591001	chrC09:44447534-44447993	UP	PC5	OK	4.04057	98.2261	4.60347	3.86257	0.0002	0.0176378	yes
GSBRNA2T00138420001	BnaA01g19850D	GSBRNA2G00138420001	GSBRNA2G00138420001	chrA01:11464957-11467265	UP	PC5	OK	1.08898	26.7409	4.618	5.03806	5e-05	0.0057242	yes
GSBRNA2T00135556001	BnaA10g18990D	GSBRNA2G00135556001	GSBRNA2G00135556001	chrA10:13639478-13641483	UP	PC5	OK	0.79944	19.7461	4.62643	4.96584	5e-05	0.0057242	yes
GSBRNA2T00140439001	BnaC03g06790D	GSBRNA2G00140439001	GSBRNA2G00140439001	chrC03:3239798-3241618	UP	PC5	OK	1.23798	31.3325	4.66161	4.38342	0.00045	0.0358814	yes
GSBRNA2T00147238001	BnaC03g54480D	GSBRNA2G00147238001	GSBRNA2G00147238001	chrC03:42276624-42279681	UP	PC5	OK	0.813776	20.8903	4.68206	4.43305	0.0004	0.0321514	yes
GSBRNA2T00108466001	BnaC05g22110D	GSBRNA2G00108466001	GSBRNA2G00108466001	chrC05:15994031-15995493	UP	PC5	OK	1.73434	45.2667	4.70599	4.20784	0.00035	0.0284996	yes
GSBRNA2T00031979001	BnaC05g04080D	GSBRNA2G00031979001	GSBRNA2G00031979001	chrC05:1988936-1993604	UP	PC5	OK	0.475599	12.5303	4.71953	5.00562	5e-05	0.0057242	yes
GSBRNA2T00088001001	BnaA02g16670D	GSBRNA2G00088001001	GSBRNA2G00088001001	chrA02:9958064-9959863	UP	PC5	OK	0.964701	25.4305	4.72034	4.33725	0.00045	0.0358814	yes
GSBRNA2T00083907001	BnaCnng62360D	GSBRNA2G00083907001	GSBRNA2G00083907001	chrCnn_random:62181987-62183029	UP	PC5	OK	1.21358	32.0077	4.72108	4.12999	0.00015	0.0137633	yes
GSBRNA2T00034799001	BnaC06g10490D	GSBRNA2G00034799001	GSBRNA2G00034799001	chrC06:12652823-12653908	UP	PC5	OK	1.70388	44.9856	4.72257	4.80233	0.0003	0.024916	yes
GSBRNA2T00012167001	BnaC04g36920D	GSBRNA2G00012167001	GSBRNA2G00012167001	chrC04:38375692-38377595	UP	PC5	OK	1.69177	44.8182	4.72748	4.94676	5e-05	0.0057242	yes
GSBRNA2T00062035001	BnaC05g10210D	GSBRNA2G00062035001	GSBRNA2G00062035001	chrC05:5736645-5739548	UP	PC5	OK	0.94437	25.0535	4.72952	4.83096	5e-05	0.0057242	yes
GSBRNA2T00087972001	BnaA10g03960D	GSBRNA2G00087972001	GSBRNA2G00087972001	chrA10:2101911-2106870	UP	PC5	OK	0.61904	16.5482	4.7405	5.44267	5e-05	0.0057242	yes
GSBRNA2T00135598001	BnaA10g19340D	GSBRNA2G00135598001	GSBRNA2G00135598001	chrA10:13778376-13779105	UP	PC5	OK	1.39239	37.4968	4.75114	4.55421	0.0003	0.024916	yes
GSBRNA2T00077001001	BnaA04g20360D	GSBRNA2G00077001001	GSBRNA2G00077001001	chrA04:15705732-15707918	UP	PC5	OK	3.03973	82.8077	4.76775	5.47384	5e-05	0.0057242	yes
GSBRNA2T00079332001	BnaC03g48810D	GSBRNA2G00079332001	GSBRNA2G00079332001	chrC03:33632883-33635337	UP	PC5	OK	0.720237	19.7224	4.77522	4.82331	5e-05	0.0057242	yes
GSBRNA2T00136135001	BnaA10g23860D	GSBRNA2G00136135001	GSBRNA2G00136135001	chrA10:15680728-15682706	UP	PC5	OK	2.65142	72.8101	4.7793	5.514	5e-05	0.0057242	yes
GSBRNA2T00130886001	BnaC01g03500D	GSBRNA2G00130886001	GSBRNA2G00130886001	chrC01:1811440-1815719	UP	PC5	OK	2.18237	60.5937	4.7952	6.22034	5e-05	0.0057242	yes
GSBRNA2T00054182001	BnaC05g12390D	GSBRNA2G00054182001	GSBRNA2G00054182001	chrC05:7168046-7171596	UP	PC5	OK	0.42942	11.9401	4.79728	4.33602	0.00015	0.0137633	yes
GSBRNA2T00061417001	BnaA06g20250D	GSBRNA2G00061417001	GSBRNA2G00061417001	chrA06:13355339-13358400	UP	PC5	OK	0.883961	24.6257	4.80004	4.91683	5e-05	0.0057242	yes
GSBRNA2T00009517001	BnaA09g04230D	GSBRNA2G00009517001	GSBRNA2G00009517001	chrA09:2092283-2092529	UP	PC5	OK	62.9983	1782.19	4.8222	9.71883	5e-05	0.0057242	yes
GSBRNA2T00146055001	BnaC09g04570D	GSBRNA2G00146055001	GSBRNA2G00146055001	chrC09:2623180-2624335	UP	PC5	OK	0.862351	24.4015	4.82255	4.11895	0.0006	0.0462176	yes
GSBRNA2T00009514001	BnaA09g04200D	GSBRNA2G00009514001	GSBRNA2G00009514001	chrA09:2085449-2085686	UP	PC5	OK	18.3228	525.631	4.84234	4.51036	5e-05	0.0057242	yes
GSBRNA2T00108140001	BnaC04g33890D	GSBRNA2G00108140001	GSBRNA2G00108140001	chrC04:35390685-35392686	UP	PC5	OK	1.10148	32.2249	4.87066	5.02418	5e-05	0.0057242	yes
GSBRNA2T00019139001	BnaC03g23540D	GSBRNA2G00019139001	GSBRNA2G00019139001	chrC03:13126441-13127773	UP	PC5	OK	1.1432	33.7725	4.8847	4.23004	0.0001	0.0100433	yes
GSBRNA2T00123724001	BnaC03g38600D	GSBRNA2G00123724001	GSBRNA2G00123724001	chrC03:23750412-23751808	UP	PC5	OK	2.32766	70.1619	4.91374	4.96529	5e-05	0.0057242	yes
GSBRNA2T00137700001	BnaA03g32800D	GSBRNA2G00137700001	GSBRNA2G00137700001	chrA03:15835061-15837447	UP	PC5	OK	0.914778	28.6374	4.96833	5.24258	5e-05	0.0057242	yes
GSBRNA2T00007569001	BnaC09g51360D	GSBRNA2G00007569001	GSBRNA2G00007569001	chrC09_random:502162-506944	UP	PC5	OK	3.85618	120.723	4.96838	4.9936	5e-05	0.0057242	yes
GSBRNA2T00085697001	BnaC04g42320D	GSBRNA2G00085697001	GSBRNA2G00085697001	chrC04:42891175-42894233	UP	PC5	OK	0.770129	24.1767	4.97237	5.32936	5e-05	0.0057242	yes
GSBRNA2T00057385001	BnaA09g47550D	GSBRNA2G00057385001	GSBRNA2G00057385001	chrA09:32017248-32018865	UP	PC5	OK	0.839793	26.4729	4.97834	4.46776	0.00015	0.0137633	yes
GSBRNA2T00150173001	BnaC03g46580D	GSBRNA2G00150173001	GSBRNA2G00150173001	chrC03:31570991-31577619	UP	PC5	OK	0.413837	13.0571	4.97963	4.86102	5e-05	0.0057242	yes
GSBRNA2T00049471001	BnaA09g39720D	GSBRNA2G00049471001	GSBRNA2G00049471001	chrA09:28106988-28109066	UP	PC5	OK	5.55982	177.615	4.99757	6.46258	5e-05	0.0057242	yes
GSBRNA2T00061117001	BnaC03g60420D	GSBRNA2G00061117001	GSBRNA2G00061117001	chrC03:49575467-49578085	UP	PC5	OK	0.573072	18.3549	5.00131	5.0053	0.00015	0.0137633	yes
GSBRNA2T00054617001	BnaCnng51570D	GSBRNA2G00054617001	GSBRNA2G00054617001	chrCnn_random:51032707-51035062	UP	PC5	OK	0.803226	25.8905	5.01047	5.3615	5e-05	0.0057242	yes
GSBRNA2T00091687001	BnaC04g02280D	GSBRNA2G00091687001	GSBRNA2G00091687001	chrC04:1749059-1749306	UP	PC5	OK	23.2784	757.923	5.02499	4.20878	5e-05	0.0057242	yes
GSBRNA2T00123615001	BnaC03g37900D	GSBRNA2G00123615001	GSBRNA2G00123615001	chrC03:23187171-23189541	UP	PC5	OK	0.917758	29.9594	5.02875	5.33374	5e-05	0.0057242	yes
GSBRNA2T00135025001	BnaC09g08530D	GSBRNA2G00135025001	GSBRNA2G00135025001	chrC09:5424420-5425647	UP	PC5	OK	0.585368	19.1117	5.02897	4.30967	0.0003	0.024916	yes
GSBRNA2T00045045001	BnaA09g09160D	GSBRNA2G00045045001	GSBRNA2G00045045001	chrA09:4567441-4569663	UP	PC5	OK	0.884656	28.9373	5.03167	4.54205	0.0003	0.024916	yes
GSBRNA2T00035758001	BnaC09g09390D	GSBRNA2G00035758001	GSBRNA2G00035758001	chrC09:6095044-6097337	UP	PC5	OK	1.11676	37.0034	5.05027	5.41589	5e-05	0.0057242	yes
GSBRNA2T00000167001	BnaA05g26490D	GSBRNA2G00000167001	GSBRNA2G00000167001	chrA05:19394218-19396152	UP	PC5	OK	1.012	33.7138	5.05805	4.6484	5e-05	0.0057242	yes
GSBRNA2T00044281001	BnaA03g48660D	GSBRNA2G00044281001	GSBRNA2G00044281001	chrA03:24953213-24953825	UP	PC5	OK	3.75169	125.097	5.05936	4.46137	0.00025	0.0211863	yes
GSBRNA2T00140434001	BnaC03g06740D	GSBRNA2G00140434001	GSBRNA2G00140434001	chrC03:3225420-3227665	UP	PC5	OK	0.82567	27.54	5.05982	4.65348	0.0003	0.024916	yes
GSBRNA2T00059183001	BnaC03g58660D	GSBRNA2G00059183001	GSBRNA2G00059183001	chrC03:47939396-47941032	UP	PC5	OK	0.735161	24.6039	5.06468	4.43834	0.00025	0.0211863	yes
GSBRNA2T00009850001	BnaA09g02340D	GSBRNA2G00009850001	GSBRNA2G00009850001	chrA09:1191116-1191977	UP	PC5	OK	3.83047	131.146	5.09751	5.82189	5e-05	0.0057242	yes
GSBRNA2T00154309001	BnaA10g15660D	GSBRNA2G00154309001	GSBRNA2G00154309001	chrA10:12088301-12089723	UP	PC5	OK	1.03432	35.5391	5.10265	4.55463	0.00055	0.0426956	yes
GSBRNA2T00093833001	BnaCnng18160D	GSBRNA2G00093833001	GSBRNA2G00093833001	chrCnn_random:16936989-16938582	UP	PC5	OK	2.60215	89.5676	5.1052	6.20102	5e-05	0.0057242	yes
GSBRNA2T00008834001	BnaC05g08260D	GSBRNA2G00008834001	GSBRNA2G00008834001	chrC05:4337958-4338465	UP	PC5	OK	2.69373	92.7983	5.10642	4.57138	5e-05	0.0057242	yes
GSBRNA2T00072978001	BnaCnng10290D	GSBRNA2G00072978001	GSBRNA2G00072978001	chrCnn_random:9360808-9362430	UP	PC5	OK	2.5985	89.7236	5.10974	5.43018	5e-05	0.0057242	yes
GSBRNA2T00131351001	BnaA01g09410D	GSBRNA2G00131351001	GSBRNA2G00131351001	chrA01:4607771-4608290	UP	PC5	OK	4.84399	169.436	5.1284	5.55904	5e-05	0.0057242	yes
GSBRNA2T00125192001	BnaC03g35490D	GSBRNA2G00125192001	GSBRNA2G00125192001	chrC03:21548269-21549696	UP	PC5	OK	7.48286	262.895	5.13475	6.62047	5e-05	0.0057242	yes
GSBRNA2T00149961001	BnaC03g45190D	GSBRNA2G00149961001	GSBRNA2G00149961001	chrC03:30197603-30198824	UP	PC5	OK	0.650913	22.9698	5.14113	4.50939	0.00025	0.0211863	yes
GSBRNA2T00015444001	BnaC03g54030D	GSBRNA2G00015444001	GSBRNA2G00015444001	chrC03:40739586-40742471	UP	PC5	OK	0.440123	15.5715	5.14486	4.52374	0.00025	0.0211863	yes
GSBRNA2T00150685001	BnaA08g18330D	GSBRNA2G00150685001	GSBRNA2G00150685001	chrA08:14366607-14368376	UP	PC5	OK	10.6821	378.021	5.1452	6.13058	5e-05	0.0057242	yes
GSBRNA2T00057082001	BnaC08g41880D	GSBRNA2G00057082001	GSBRNA2G00057082001	chrC08:36260198-36260615	UP	PC5	OK	3.114	110.57	5.15005	4.33576	0.0001	0.0100433	yes
GSBRNA2T00026681001	BnaCnng04950D	GSBRNA2G00026681001	GSBRNA2G00026681001	chrCnn_random:4526491-4526845	UP	PC5	OK	5.27257	187.775	5.15435	4.36391	5e-05	0.0057242	yes
GSBRNA2T00138807001	BnaA03g22500D	GSBRNA2G00138807001	GSBRNA2G00138807001	chrA03:10681807-10684654	UP	PC5	OK	0.951143	33.9317	5.15683	4.46039	5e-05	0.0057242	yes
GSBRNA2T00136136001	BnaA10g23870D	GSBRNA2G00136136001	GSBRNA2G00136136001	chrA10:15683922-15685873	UP	PC5	OK	5.40078	193.72	5.16466	6.71947	5e-05	0.0057242	yes
GSBRNA2T00147846001	BnaC06g37750D	GSBRNA2G00147846001	GSBRNA2G00147846001	chrC06:35644119-35644878	UP	PC5	OK	2.82472	101.4	5.1658	5.32924	5e-05	0.0057242	yes
GSBRNA2T00107093001	BnaC09g48600D	GSBRNA2G00107093001	GSBRNA2G00107093001	chrC09:47328694-47330684	UP	PC5	OK	3.32996	119.632	5.16696	6.50897	5e-05	0.0057242	yes
GSBRNA2T00079842001	BnaAnng28400D	GSBRNA2G00079842001	GSBRNA2G00079842001	chrAnn_random:32449232-32452545	UP	PC5	OK	0.37636	13.6684	5.18259	4.83196	5e-05	0.0057242	yes
GSBRNA2T00111879001	BnaA03g29240D	GSBRNA2G00111879001	GSBRNA2G00111879001	chrA03:14224591-14225789	UP	PC5	OK	1.25108	45.6931	5.19073	4.5504	0.00015	0.0137633	yes
GSBRNA2T00141693001	BnaC03g50220D	GSBRNA2G00141693001	GSBRNA2G00141693001	chrC03:34901995-34905678	UP	PC5	OK	0.244498	8.92992	5.19075	4.98353	0.00015	0.0137633	yes
GSBRNA2T00130020001	BnaA03g05190D	GSBRNA2G00130020001	GSBRNA2G00130020001	chrA03:2389310-2391491	UP	PC5	OK	0.698178	26.1493	5.22703	5.05666	5e-05	0.0057242	yes
GSBRNA2T00099032001	BnaA07g18750D	GSBRNA2G00099032001	GSBRNA2G00099032001	chrA07:15212495-15213819	UP	PC5	OK	2.58116	96.8464	5.22961	5.639	5e-05	0.0057242	yes
GSBRNA2T00128143001	BnaC08g03920D	GSBRNA2G00128143001	GSBRNA2G00128143001	chrC08:4093752-4094286	UP	PC5	OK	4.80056	180.899	5.23584	5.46562	5e-05	0.0057242	yes
GSBRNA2T00112105001	BnaA03g27350D	GSBRNA2G00112105001	GSBRNA2G00112105001	chrA03:13488872-13489461	UP	PC5	OK	9.01688	341.321	5.24236	5.37689	5e-05	0.0057242	yes
GSBRNA2T00048242001	BnaCnng48740D	GSBRNA2G00048242001	GSBRNA2G00048242001	chrCnn_random:48120787-48122618	UP	PC5	OK	5.47021	207.355	5.24437	6.71818	5e-05	0.0057242	yes
GSBRNA2T00089606001	BnaA08g27230D	GSBRNA2G00089606001	GSBRNA2G00089606001	chrA08:18216369-18218234	UP	PC5	OK	10.9637	416.085	5.24607	6.05523	5e-05	0.0057242	yes
GSBRNA2T00070572001	BnaA09g13690D	GSBRNA2G00070572001	GSBRNA2G00070572001	chrA09:7788430-7788670	UP	PC5	OK	86.3491	3293.38	5.25325	6.21105	5e-05	0.0057242	yes
GSBRNA2T00073359001	BnaC02g34750D	GSBRNA2G00073359001	GSBRNA2G00073359001	chrC02:37391216-37393552	UP	PC5	OK	1.18273	45.1122	5.25332	5.5835	5e-05	0.0057242	yes
GSBRNA2T00020917001	BnaCnng31830D	GSBRNA2G00020917001	GSBRNA2G00020917001	chrCnn_random:30249218-30249483	UP	PC5	OK	23.526	898.422	5.25506	5.33131	5e-05	0.0057242	yes
GSBRNA2T00135036001	BnaC09g08620D	GSBRNA2G00135036001	GSBRNA2G00135036001	chrC09:5495764-5507132	UP	PC5	OK	0.0997282	3.80883	5.2552	4.80965	0.0001	0.0100433	yes
GSBRNA2T00017053001	BnaA01g36400D	GSBRNA2G00017053001	GSBRNA2G00017053001	chrA01_random:1960991-1965651	UP	PC5	OK	0.594256	22.9419	5.27075	5.66495	5e-05	0.0057242	yes
GSBRNA2T00007840001	BnaCnng23280D	GSBRNA2G00007840001	GSBRNA2G00007840001	chrCnn_random:21839172-21839727	UP	PC5	OK	2.18974	84.7824	5.27494	4.34842	0.00015	0.0137633	yes
GSBRNA2T00087683001	BnaA01g22700D	GSBRNA2G00087683001	GSBRNA2G00087683001	chrA01:15012168-15012396	UP	PC5	OK	21.5224	834.272	5.27661	4.75358	0.0003	0.024916	yes
GSBRNA2T00088645001	BnaA04g26890D	GSBRNA2G00088645001	GSBRNA2G00088645001	chrA04:19011277-19012195	UP	PC5	OK	6.03277	234.17	5.27859	5.86034	5e-05	0.0057242	yes
GSBRNA2T00149415001	BnaA01g16670D	GSBRNA2G00149415001	GSBRNA2G00149415001	chrA01:8692976-8694694	UP	PC5	OK	0.858915	33.4313	5.28254	5.51752	5e-05	0.0057242	yes
GSBRNA2T00100311001	BnaC07g47390D	GSBRNA2G00100311001	GSBRNA2G00100311001	chrC07:44623201-44625811	UP	PC5	OK	0.841455	32.7576	5.2828	6.11597	5e-05	0.0057242	yes
GSBRNA2T00121761001	BnaC08g21170D	GSBRNA2G00121761001	GSBRNA2G00121761001	chrC08:23753409-23754167	UP	PC5	OK	12.6509	493.517	5.28579	6.50018	5e-05	0.0057242	yes
GSBRNA2T00144556001	BnaA06g31320D	GSBRNA2G00144556001	GSBRNA2G00144556001	chrA06:21077203-21079483	UP	PC5	OK	4.64462	181.32	5.28683	6.50359	5e-05	0.0057242	yes
GSBRNA2T00132757001	BnaA05g02520D	GSBRNA2G00132757001	GSBRNA2G00132757001	chrA05:1384992-1386814	UP	PC5	OK	1.54005	60.1854	5.28836	4.70722	0.00015	0.0137633	yes
GSBRNA2T00071611001	BnaC03g34350D	GSBRNA2G00071611001	GSBRNA2G00071611001	chrC03:20837015-20839335	UP	PC5	OK	4.17696	164.67	5.30098	6.69392	5e-05	0.0057242	yes
GSBRNA2T00150563001	BnaA10g00230D	GSBRNA2G00150563001	GSBRNA2G00150563001	chrA10:143341-144786	UP	PC5	OK	0.630211	24.8491	5.30122	4.50233	0.00055	0.0426956	yes
GSBRNA2T00032154001	BnaC05g29750D	GSBRNA2G00032154001	GSBRNA2G00032154001	chrC05:28658311-28661206	UP	PC5	OK	0.937294	37.0044	5.30305	5.6621	5e-05	0.0057242	yes
GSBRNA2T00124091001	BnaC04g19100D	GSBRNA2G00124091001	GSBRNA2G00124091001	chrC04:19276819-19278348	UP	PC5	OK	0.888922	35.1029	5.30339	4.7615	5e-05	0.0057242	yes
GSBRNA2T00085465001	BnaC05g01430D	GSBRNA2G00085465001	GSBRNA2G00085465001	chrC05:746688-748532	UP	PC5	OK	5.99976	239.499	5.31897	6.79357	5e-05	0.0057242	yes
GSBRNA2T00045562001	BnaCnng46510D	GSBRNA2G00045562001	GSBRNA2G00045562001	chrCnn_random:45837549-45840230	UP	PC5	OK	0.521055	20.8866	5.325	4.81957	0.0002	0.0176378	yes
GSBRNA2T00144446001	BnaA06g30420D	GSBRNA2G00144446001	GSBRNA2G00144446001	chrA06:20549606-20551397	UP	PC5	OK	9.76501	391.589	5.32557	6.11032	5e-05	0.0057242	yes
GSBRNA2T00021776001	BnaA04g05320D	GSBRNA2G00021776001	GSBRNA2G00021776001	chrA04:4106721-4109488	UP	PC5	OK	1.7578	70.6856	5.32957	6.68008	5e-05	0.0057242	yes
GSBRNA2T00113661001	BnaA03g39260D	GSBRNA2G00113661001	GSBRNA2G00113661001	chrA03:19570110-19575083	UP	PC5	OK	0.423967	17.0595	5.33048	5.20822	0.0002	0.0176378	yes
GSBRNA2T00109746001	BnaA06g21100D	GSBRNA2G00109746001	GSBRNA2G00109746001	chrA06:14654726-14655146	UP	PC5	OK	3.78426	152.498	5.33264	5.10906	5e-05	0.0057242	yes
GSBRNA2T00048429001	BnaA05g16950D	GSBRNA2G00048429001	GSBRNA2G00048429001	chrA05:11738028-11740890	UP	PC5	OK	0.856265	34.5646	5.3351	5.22191	0.00015	0.0137633	yes
GSBRNA2T00116083001	BnaC01g16500D	GSBRNA2G00116083001	GSBRNA2G00116083001	chrC01:11313530-11314792	UP	PC5	OK	11.244	459.544	5.35297	6.46618	5e-05	0.0057242	yes
GSBRNA2T00135745001	BnaA10g20620D	GSBRNA2G00135745001	GSBRNA2G00135745001	chrA10:14361103-14364245	UP	PC5	OK	0.986097	40.3377	5.35426	6.19866	5e-05	0.0057242	yes
GSBRNA2T00038326001	BnaA09g28190D	GSBRNA2G00038326001	GSBRNA2G00038326001	chrA09:21076799-21077159	UP	PC5	OK	4.55245	186.748	5.35831	6.75219	0.0001	0.0100433	yes
GSBRNA2T00142849001	BnaC07g25300D	GSBRNA2G00142849001	GSBRNA2G00142849001	chrC07:31457934-31459374	UP	PC5	OK	6.25316	256.939	5.3607	6.86942	5e-05	0.0057242	yes
GSBRNA2T00023807001	BnaC05g39980D	GSBRNA2G00023807001	GSBRNA2G00023807001	chrC05:38312815-38315047	UP	PC5	OK	2.56002	105.259	5.36164	6.74799	5e-05	0.0057242	yes
GSBRNA2T00059979001	BnaA08g19130D	GSBRNA2G00059979001	GSBRNA2G00059979001	chrA08:14752756-14753110	UP	PC5	OK	3.94656	162.281	5.36176	4.28849	0.0001	0.0100433	yes
GSBRNA2T00081068001	BnaA02g04170D	GSBRNA2G00081068001	GSBRNA2G00081068001	chrA02:1865798-1868113	UP	PC5	OK	1.02467	42.1957	5.36387	6.10866	5e-05	0.0057242	yes
GSBRNA2T00145168001	BnaC08g01520D	GSBRNA2G00145168001	GSBRNA2G00145168001	chrC08:1194668-1197423	UP	PC5	OK	0.377756	15.57	5.36517	4.44579	0.0001	0.0100433	yes
GSBRNA2T00108951001	BnaC08g25550D	GSBRNA2G00108951001	GSBRNA2G00108951001	chrC08:27233984-27238109	UP	PC5	OK	1.09624	45.1952	5.36553	5.75669	5e-05	0.0057242	yes
GSBRNA2T00058379001	BnaA03g19650D	GSBRNA2G00058379001	GSBRNA2G00058379001	chrA03:9316135-9316572	UP	PC5	OK	17.5488	726.58	5.37168	6.23042	5e-05	0.0057242	yes
GSBRNA2T00115206001	BnaC04g25500D	GSBRNA2G00115206001	GSBRNA2G00115206001	chrC04:26635738-26638091	UP	PC5	OK	3.80507	159.253	5.38726	6.74137	5e-05	0.0057242	yes
GSBRNA2T00025698001	BnaC08g50140D	GSBRNA2G00025698001	GSBRNA2G00025698001	chrC08_random:4498766-4500967	UP	PC5	OK	0.787427	33.275	5.40115	5.37328	5e-05	0.0057242	yes
GSBRNA2T00037942001	BnaCnng41410D	GSBRNA2G00037942001	GSBRNA2G00037942001	chrCnn_random:40227123-40227543	UP	PC5	OK	5.45395	230.623	5.40209	4.81584	0.00025	0.0211863	yes
GSBRNA2T00157538001	BnaC01g17820D	GSBRNA2G00157538001	GSBRNA2G00157538001	chrC01:12247230-12251456	UP	PC5	OK	1.12836	47.7838	5.40423	5.3456	0.00015	0.0137633	yes
GSBRNA2T00054757001	BnaA06g35670D	GSBRNA2G00054757001	GSBRNA2G00054757001	chrA06:23426776-23427769	UP	PC5	OK	1.52586	64.6335	5.40459	4.98387	0.0002	0.0176378	yes
GSBRNA2T00064167001	BnaA05g34110D	GSBRNA2G00064167001	GSBRNA2G00064167001	chrA05:23031774-23037597	UP	PC5	OK	0.374516	15.9069	5.40848	4.8612	5e-05	0.0057242	yes
GSBRNA2T00056333001	BnaA01g14010D	GSBRNA2G00056333001	GSBRNA2G00056333001	chrA01:7116843-7118074	UP	PC5	OK	15.1995	645.604	5.40856	6.40858	5e-05	0.0057242	yes
GSBRNA2T00154297001	BnaA10g15570D	GSBRNA2G00154297001	GSBRNA2G00154297001	chrA10:12053350-12055831	UP	PC5	OK	7.78576	332.229	5.4152	6.05131	5e-05	0.0057242	yes
GSBRNA2T00042034001	BnaC09g15570D	GSBRNA2G00042034001	GSBRNA2G00042034001	chrC09:12390261-12391530	UP	PC5	OK	0.794239	33.9306	5.41687	5.11453	0.0002	0.0176378	yes
GSBRNA2T00125437001	BnaA06g15820D	GSBRNA2G00125437001	GSBRNA2G00125437001	chrA06:8684158-8684921	UP	PC5	OK	10.9612	468.452	5.41742	6.78549	5e-05	0.0057242	yes
GSBRNA2T00038181001	BnaC04g51500D	GSBRNA2G00038181001	GSBRNA2G00038181001	chrC04:48806540-48807479	UP	PC5	OK	5.31088	227.114	5.41832	6.41841	5e-05	0.0057242	yes
GSBRNA2T00014247001	BnaC07g49180D	GSBRNA2G00014247001	GSBRNA2G00014247001	chrC07_random:1794300-1796090	UP	PC5	OK	5.11888	219.81	5.42428	6.75268	5e-05	0.0057242	yes
GSBRNA2T00086320001	BnaC01g27710D	GSBRNA2G00086320001	GSBRNA2G00086320001	chrC01:25347034-25348589	UP	PC5	OK	1.3438	57.7734	5.42602	5.99364	5e-05	0.0057242	yes
GSBRNA2T00101037001	BnaC04g28060D	GSBRNA2G00101037001	GSBRNA2G00101037001	chrC04:29471180-29473081	UP	PC5	OK	3.13068	135.538	5.43607	6.42965	5e-05	0.0057242	yes
GSBRNA2T00091017001	BnaA08g03150D	GSBRNA2G00091017001	GSBRNA2G00091017001	chrA08:2569547-2571009	UP	PC5	OK	1.47484	64.0472	5.44051	4.78412	0.0001	0.0100433	yes
GSBRNA2T00016586001	BnaC02g44910D	GSBRNA2G00016586001	GSBRNA2G00016586001	chrC02_random:703214-707021	UP	PC5	OK	0.463069	20.1301	5.44198	4.98438	5e-05	0.0057242	yes
GSBRNA2T00100059001	BnaC07g45470D	GSBRNA2G00100059001	GSBRNA2G00100059001	chrC07:43528788-43530787	UP	PC5	OK	0.542754	23.657	5.44583	4.76456	0.0001	0.0100433	yes
GSBRNA2T00011949001	BnaCnng71770D	GSBRNA2G00011949001	GSBRNA2G00011949001	chrCnn_random:72040788-72042162	UP	PC5	OK	3.15033	137.832	5.45126	6.23284	5e-05	0.0057242	yes
GSBRNA2T00070573001	BnaA09g13680D	GSBRNA2G00070573001	GSBRNA2G00070573001	chrA09:7785550-7786049	UP	PC5	OK	5.54196	243.518	5.45749	5.45463	5e-05	0.0057242	yes
GSBRNA2T00061514001	BnaA06g19910D	GSBRNA2G00061514001	GSBRNA2G00061514001	chrA06:12609413-12612427	UP	PC5	OK	0.487736	21.4946	5.46173	4.7786	0.0001	0.0100433	yes
GSBRNA2T00064118001	BnaA05g33680D	GSBRNA2G00064118001	GSBRNA2G00064118001	chrA05:22736815-22737232	UP	PC5	OK	12.7318	562.926	5.46644	5.97079	5e-05	0.0057242	yes
GSBRNA2T00079392001	BnaA05g25900D	GSBRNA2G00079392001	GSBRNA2G00079392001	chrA05:19072075-19074317	UP	PC5	OK	2.99861	132.663	5.46733	6.63067	5e-05	0.0057242	yes
GSBRNA2T00146548001	BnaA07g33190D	GSBRNA2G00146548001	GSBRNA2G00146548001	chrA07:22830688-22831453	UP	PC5	OK	2.1968	97.1971	5.46744	4.75389	0.0001	0.0100433	yes
GSBRNA2T00121876001	BnaA09g37510D	GSBRNA2G00121876001	GSBRNA2G00121876001	chrA09:26976173-26977760	UP	PC5	OK	2.96277	131.154	5.46817	5.57675	5e-05	0.0057242	yes
GSBRNA2T00098523001	BnaA07g14690D	GSBRNA2G00098523001	GSBRNA2G00098523001	chrA07:12900228-12907775	UP	PC5	OK	0.207761	9.22643	5.47277	4.92161	5e-05	0.0057242	yes
GSBRNA2T00096788001	BnaA03g56990D	GSBRNA2G00096788001	GSBRNA2G00096788001	chrA03_random:950826-952038	UP	PC5	OK	0.799283	35.7774	5.4842	5.13266	0.00015	0.0137633	yes
GSBRNA2T00039635001	BnaA08g31700D	GSBRNA2G00039635001	GSBRNA2G00039635001	chrA08_random:2093610-2098425	UP	PC5	OK	0.142268	6.3747	5.48568	4.50368	0.00045	0.0358814	yes
GSBRNA2T00150900001	BnaA08g16670D	GSBRNA2G00150900001	GSBRNA2G00150900001	chrA08:13501183-13504036	UP	PC5	OK	0.414257	18.5985	5.48852	5.09474	0.00035	0.0284996	yes
GSBRNA2T00003714001	BnaA03g58450D	GSBRNA2G00003714001	GSBRNA2G00003714001	chrA03_random:1686387-1689592	UP	PC5	OK	3.49911	157.126	5.48879	6.26113	5e-05	0.0057242	yes
GSBRNA2T00026279001	BnaC01g37680D	GSBRNA2G00026279001	GSBRNA2G00026279001	chrC01:36968831-36971523	UP	PC5	OK	6.67064	300.453	5.49317	5.66828	5e-05	0.0057242	yes
GSBRNA2T00070219001	BnaA02g13590D	GSBRNA2G00070219001	GSBRNA2G00070219001	chrA02:7458165-7459260	UP	PC5	OK	0.808456	36.5006	5.49661	4.85866	0.0002	0.0176378	yes
GSBRNA2T00007829001	BnaC02g47960D	GSBRNA2G00007829001	GSBRNA2G00007829001	chrC02_random:4073097-4075518	UP	PC5	OK	1.41617	64.0018	5.49804	5.55887	5e-05	0.0057242	yes
GSBRNA2T00111771001	BnaA03g30180D	GSBRNA2G00111771001	GSBRNA2G00111771001	chrA03:14640282-14642602	UP	PC5	OK	2.23662	101.088	5.49815	6.02051	5e-05	0.0057242	yes
GSBRNA2T00135080001	BnaC02g17750D	GSBRNA2G00135080001	GSBRNA2G00135080001	chrC02:13362886-13364063	UP	PC5	OK	0.907561	41.0249	5.49836	4.8347	5e-05	0.0057242	yes
GSBRNA2T00071549001	BnaC03g33860D	GSBRNA2G00071549001	GSBRNA2G00071549001	chrC03:20600155-20601719	UP	PC5	OK	1.75087	79.3484	5.50206	5.88255	5e-05	0.0057242	yes
GSBRNA2T00078774001	BnaA08g13410D	GSBRNA2G00078774001	GSBRNA2G00078774001	chrA08:11621550-11622840	UP	PC5	OK	2.14077	97.0432	5.50242	5.61135	5e-05	0.0057242	yes
GSBRNA2T00154052001	BnaA05g20840D	GSBRNA2G00154052001	GSBRNA2G00154052001	chrA05:16175496-16177949	UP	PC5	OK	0.53311	24.2253	5.50594	4.75524	0.0002	0.0176378	yes
GSBRNA2T00074030001	BnaC04g00950D	GSBRNA2G00074030001	GSBRNA2G00074030001	chrC04:778955-780317	UP	PC5	OK	1.02445	46.5885	5.50705	5.4247	5e-05	0.0057242	yes
GSBRNA2T00016475001	BnaAnng13710D	GSBRNA2G00016475001	GSBRNA2G00016475001	chrAnn_random:14645653-14647511	UP	PC5	OK	3.66983	167.993	5.51654	6.57935	5e-05	0.0057242	yes
GSBRNA2T00009508001	BnaA09g04150D	GSBRNA2G00009508001	GSBRNA2G00009508001	chrA09:2070698-2071427	UP	PC5	OK	2.45344	112.389	5.51755	4.82767	0.0001	0.0100433	yes
GSBRNA2T00072265001	BnaA02g27790D	GSBRNA2G00072265001	GSBRNA2G00072265001	chrA02:20529416-20530169	UP	PC5	OK	1.60604	73.6684	5.51947	4.6496	5e-05	0.0057242	yes
GSBRNA2T00138909001	BnaA03g21590D	GSBRNA2G00138909001	GSBRNA2G00138909001	chrA03:10232719-10234788	UP	PC5	OK	5.82321	268.519	5.52706	6.59464	5e-05	0.0057242	yes
GSBRNA2T00022521001	BnaCnng75130D	GSBRNA2G00022521001	GSBRNA2G00022521001	chrCnn_random:76107204-76108909	UP	PC5	OK	3.37811	156.816	5.53671	6.39731	5e-05	0.0057242	yes
GSBRNA2T00151985001	BnaC02g04170D	GSBRNA2G00151985001	GSBRNA2G00151985001	chrC02:2121743-2125617	UP	PC5	OK	0.611979	28.4108	5.53682	5.94079	5e-05	0.0057242	yes
GSBRNA2T00137699001	BnaA03g32810D	GSBRNA2G00137699001	GSBRNA2G00137699001	chrA03:15839251-15842058	UP	PC5	OK	5.62149	261.32	5.53872	6.33368	5e-05	0.0057242	yes
GSBRNA2T00086855001	BnaA01g22900D	GSBRNA2G00086855001	GSBRNA2G00086855001	chrA01:15244579-15246305	UP	PC5	OK	0.699624	32.5245	5.5388	4.89773	0.00025	0.0211863	yes
GSBRNA2T00061111001	BnaC03g60370D	GSBRNA2G00061111001	GSBRNA2G00061111001	chrC03:49558760-49561334	UP	PC5	OK	0.634326	29.6347	5.54592	5.80592	5e-05	0.0057242	yes
GSBRNA2T00045084001	BnaA04g24900D	GSBRNA2G00045084001	GSBRNA2G00045084001	chrA04:18111650-18114109	UP	PC5	OK	0.584768	27.3356	5.54677	4.80894	0.00025	0.0211863	yes
GSBRNA2T00149616001	BnaA01g15090D	GSBRNA2G00149616001	GSBRNA2G00149616001	chrA01:7692787-7696164	UP	PC5	OK	1.24213	58.1133	5.54798	5.38732	5e-05	0.0057242	yes
GSBRNA2T00133749001	BnaC07g28310D	GSBRNA2G00133749001	GSBRNA2G00133749001	chrC07:33479806-33482229	UP	PC5	OK	0.41766	19.6797	5.55824	5.34921	0.0003	0.024916	yes
GSBRNA2T00129640001	BnaA03g02030D	GSBRNA2G00129640001	GSBRNA2G00129640001	chrA03:939751-941250	UP	PC5	OK	2.18799	103.342	5.56167	6.00839	5e-05	0.0057242	yes
GSBRNA2T00012909001	BnaA02g08480D	GSBRNA2G00012909001	GSBRNA2G00012909001	chrA02:4133018-4137651	UP	PC5	OK	1.96827	93.3784	5.56809	6.73243	5e-05	0.0057242	yes
GSBRNA2T00086218001	BnaCnng14580D	GSBRNA2G00086218001	GSBRNA2G00086218001	chrCnn_random:13512548-13513348	UP	PC5	OK	3.96856	189.532	5.57768	6.03738	5e-05	0.0057242	yes
GSBRNA2T00077121001	BnaCnng60280D	GSBRNA2G00077121001	GSBRNA2G00077121001	chrCnn_random:60038806-60040960	UP	PC5	OK	2.91929	139.744	5.58103	6.55707	5e-05	0.0057242	yes
GSBRNA2T00153589001	BnaC03g32550D	GSBRNA2G00153589001	GSBRNA2G00153589001	chrC03:19975600-19978003	UP	PC5	OK	3.5315	169.519	5.58502	7.04997	5e-05	0.0057242	yes
GSBRNA2T00098662001	BnaA07g15740D	GSBRNA2G00098662001	GSBRNA2G00098662001	chrA07:13520757-13522371	UP	PC5	OK	2.2507	108.199	5.58717	6.48314	5e-05	0.0057242	yes
GSBRNA2T00104170001	BnaC09g44510D	GSBRNA2G00104170001	GSBRNA2G00104170001	chrC09:45288733-45291079	UP	PC5	OK	0.361851	17.4359	5.59052	5.14772	0.0001	0.0100433	yes
GSBRNA2T00095567001	BnaC09g21050D	GSBRNA2G00095567001	GSBRNA2G00095567001	chrC09:18347822-18349647	UP	PC5	OK	0.717104	34.5605	5.5908	5.31109	5e-05	0.0057242	yes
GSBRNA2T00006022001	BnaAnng03110D	GSBRNA2G00006022001	GSBRNA2G00006022001	chrAnn_random:2479088-2480144	UP	PC5	OK	1.18059	56.9748	5.59274	4.96402	0.0001	0.0100433	yes
GSBRNA2T00071362001	BnaC06g14040D	GSBRNA2G00071362001	GSBRNA2G00071362001	chrC06:16889001-16890615	UP	PC5	OK	3.58851	173.213	5.59302	6.64191	5e-05	0.0057242	yes
GSBRNA2T00002764001	BnaC05g02570D	GSBRNA2G00002764001	GSBRNA2G00002764001	chrC05:1250504-1254969	UP	PC5	OK	0.298189	14.5691	5.61055	5.15887	0.00015	0.0137633	yes
GSBRNA2T00052781001	BnaA02g07920D	GSBRNA2G00052781001	GSBRNA2G00052781001	chrA02:3750092-3753377	UP	PC5	OK	1.59252	78.6001	5.62515	6.68517	5e-05	0.0057242	yes
GSBRNA2T00150427001	BnaA10g01390D	GSBRNA2G00150427001	GSBRNA2G00150427001	chrA10:738266-740715	UP	PC5	OK	2.75398	136.354	5.6297	6.58324	5e-05	0.0057242	yes
GSBRNA2T00150525001	BnaA10g00580D	GSBRNA2G00150525001	GSBRNA2G00150525001	chrA10:293367-294087	UP	PC5	OK	1.43951	71.3929	5.63213	5.09073	0.00015	0.0137633	yes
GSBRNA2T00097760001	BnaC03g72420D	GSBRNA2G00097760001	GSBRNA2G00097760001	chrC03_random:705618-707609	UP	PC5	OK	9.67608	483.822	5.64391	5.7332	5e-05	0.0057242	yes
GSBRNA2T00030817001	BnaA02g26540D	GSBRNA2G00030817001	GSBRNA2G00030817001	chrA02:19586983-19589684	UP	PC5	OK	1.03902	52.1366	5.649	5.83836	5e-05	0.0057242	yes
GSBRNA2T00100044001	BnaC07g45340D	GSBRNA2G00100044001	GSBRNA2G00100044001	chrC07:43470227-43474640	UP	PC5	OK	2.39543	120.734	5.6554	6.24537	5e-05	0.0057242	yes
GSBRNA2T00025406001	BnaC09g38100D	GSBRNA2G00025406001	GSBRNA2G00025406001	chrC09:41110266-41112599	UP	PC5	OK	6.84885	345.456	5.6565	6.37775	5e-05	0.0057242	yes
GSBRNA2T00153567001	BnaC03g32350D	GSBRNA2G00153567001	GSBRNA2G00153567001	chrC03:19884600-19887518	UP	PC5	OK	1.36641	68.9449	5.65698	6.30457	5e-05	0.0057242	yes
GSBRNA2T00074358001	BnaC05g40510D	GSBRNA2G00074358001	GSBRNA2G00074358001	chrC05:38661297-38663262	UP	PC5	OK	0.563529	28.4525	5.65792	4.81333	0.00015	0.0137633	yes
GSBRNA2T00113709001	BnaA03g38910D	GSBRNA2G00113709001	GSBRNA2G00113709001	chrA03:19347039-19349443	UP	PC5	OK	0.634369	32.0829	5.66034	4.98871	5e-05	0.0057242	yes
GSBRNA2T00081382001	BnaA02g04760D	GSBRNA2G00081382001	GSBRNA2G00081382001	chrA02:2113033-2114146	UP	PC5	OK	3.36012	169.959	5.66053	5.87437	5e-05	0.0057242	yes
GSBRNA2T00065059001	BnaCnng08650D	GSBRNA2G00065059001	GSBRNA2G00065059001	chrCnn_random:8087173-8087905	UP	PC5	OK	2.62397	132.738	5.66069	5.83392	5e-05	0.0057242	yes
GSBRNA2T00141196001	BnaC04g09250D	GSBRNA2G00141196001	GSBRNA2G00141196001	chrC04:7005379-7007460	UP	PC5	OK	1.10211	55.8101	5.66218	5.10583	0.00025	0.0211863	yes
GSBRNA2T00112086001	BnaA03g27540D	GSBRNA2G00112086001	GSBRNA2G00112086001	chrA03:13552850-13555231	UP	PC5	OK	2.8126	142.653	5.66446	6.46388	5e-05	0.0057242	yes
GSBRNA2T00153606001	BnaC03g32670D	GSBRNA2G00153606001	GSBRNA2G00153606001	chrC03:20021785-20027056	UP	PC5	OK	0.345481	17.5883	5.66987	5.2046	0.0002	0.0176378	yes
GSBRNA2T00065186001	BnaAnng24780D	GSBRNA2G00065186001	GSBRNA2G00065186001	chrAnn_random:28652830-28655114	UP	PC5	OK	1.87032	95.2983	5.67109	6.62383	5e-05	0.0057242	yes
GSBRNA2T00113633001	BnaA03g39490D	GSBRNA2G00113633001	GSBRNA2G00113633001	chrA03:19704426-19706651	UP	PC5	OK	1.31369	66.9723	5.67187	5.74288	5e-05	0.0057242	yes
GSBRNA2T00101294001	BnaC01g33860D	GSBRNA2G00101294001	GSBRNA2G00101294001	chrC01:33064622-33067890	UP	PC5	OK	1.5667	80.0893	5.67581	6.5005	5e-05	0.0057242	yes
GSBRNA2T00046506001	BnaA06g19700D	GSBRNA2G00046506001	GSBRNA2G00046506001	chrA06:12214163-12217050	UP	PC5	OK	0.345326	17.7144	5.68082	4.87774	5e-05	0.0057242	yes
GSBRNA2T00150081001	BnaC03g45950D	GSBRNA2G00150081001	GSBRNA2G00150081001	chrC03:30969615-30972158	UP	PC5	OK	0.589903	30.3067	5.68301	4.85922	0.0001	0.0100433	yes
GSBRNA2T00123616001	BnaC03g37910D	GSBRNA2G00123616001	GSBRNA2G00123616001	chrC03:23193115-23195975	UP	PC5	OK	5.0119	258.002	5.68588	6.36572	5e-05	0.0057242	yes
GSBRNA2T00126366001	BnaA04g03610D	GSBRNA2G00126366001	GSBRNA2G00126366001	chrA04:2458405-2460621	UP	PC5	OK	2.94873	152.134	5.68911	6.47003	5e-05	0.0057242	yes
GSBRNA2T00015842001	BnaC03g27530D	GSBRNA2G00015842001	GSBRNA2G00015842001	chrC03:16008363-16009604	UP	PC5	OK	0.5518	28.4795	5.68963	5.01883	0.0003	0.024916	yes
GSBRNA2T00107791001	BnaC01g11000D	GSBRNA2G00107791001	GSBRNA2G00107791001	chrC01:6789782-6790301	UP	PC5	OK	3.77497	195.346	5.69343	5.88085	5e-05	0.0057242	yes
GSBRNA2T00113071001	BnaC06g29240D	GSBRNA2G00113071001	GSBRNA2G00113071001	chrC06:30267734-30268808	UP	PC5	OK	0.726427	37.6577	5.69598	4.83933	0.00025	0.0211863	yes
GSBRNA2T00071612001	BnaC03g34360D	GSBRNA2G00071612001	GSBRNA2G00071612001	chrC03:20839388-20840047	UP	PC5	OK	2.35312	122.49	5.70194	5.27179	0.0001	0.0100433	yes
GSBRNA2T00078951001	BnaA10g07190D	GSBRNA2G00078951001	GSBRNA2G00078951001	chrA10:5649901-5650722	UP	PC5	OK	1.90057	99.3196	5.70758	5.46893	0.0001	0.0100433	yes
GSBRNA2T00075915001	BnaCnng10780D	GSBRNA2G00075915001	GSBRNA2G00075915001	chrCnn_random:9953939-9957781	UP	PC5	OK	0.353447	18.5704	5.71537	5.11929	0.0001	0.0100433	yes
GSBRNA2T00016719001	BnaCnng73190D	GSBRNA2G00016719001	GSBRNA2G00016719001	chrCnn_random:73683813-73684891	UP	PC5	OK	10.8905	574.732	5.72174	6.84872	5e-05	0.0057242	yes
GSBRNA2T00003959001	BnaC05g50860D	GSBRNA2G00003959001	GSBRNA2G00003959001	chrC05_random:1684787-1687953	UP	PC5	OK	0.453023	23.9766	5.7259	5.17986	5e-05	0.0057242	yes
GSBRNA2T00055652001	BnaCnng52120D	GSBRNA2G00055652001	GSBRNA2G00055652001	chrCnn_random:51573312-51573705	UP	PC5	OK	3.40112	180.02	5.726	4.98764	0.0002	0.0176378	yes
GSBRNA2T00017356001	BnaCnng29100D	GSBRNA2G00017356001	GSBRNA2G00017356001	chrCnn_random:27570085-27572816	UP	PC5	OK	0.335538	17.8692	5.73485	5.16118	0.0002	0.0176378	yes
GSBRNA2T00094938001	BnaA08g03570D	GSBRNA2G00094938001	GSBRNA2G00094938001	chrA08:2899574-2900108	UP	PC5	OK	3.04206	162.033	5.73509	5.23555	5e-05	0.0057242	yes
GSBRNA2T00137442001	BnaA03g34960D	GSBRNA2G00137442001	GSBRNA2G00137442001	chrA03:17053224-17056487	UP	PC5	OK	0.52837	28.1771	5.73683	5.21336	5e-05	0.0057242	yes
GSBRNA2T00137501001	BnaA03g34410D	GSBRNA2G00137501001	GSBRNA2G00137501001	chrA03:16754313-16755968	UP	PC5	OK	2.77409	148.462	5.74193	6.50086	5e-05	0.0057242	yes
GSBRNA2T00084595001	BnaC04g47440D	GSBRNA2G00084595001	GSBRNA2G00084595001	chrC04:46420608-46422489	UP	PC5	OK	0.454008	24.3349	5.74417	4.83584	5e-05	0.0057242	yes
GSBRNA2T00099470001	BnaA07g22480D	GSBRNA2G00099470001	GSBRNA2G00099470001	chrA07:17137950-17143065	UP	PC5	OK	0.36574	19.6914	5.7506	5.21231	5e-05	0.0057242	yes
GSBRNA2T00076418001	BnaA01g29830D	GSBRNA2G00076418001	GSBRNA2G00076418001	chrA01:20617654-20620584	UP	PC5	OK	5.94827	320.777	5.75296	5.93053	5e-05	0.0057242	yes
GSBRNA2T00085370001	BnaC05g00650D	GSBRNA2G00085370001	GSBRNA2G00085370001	chrC05:348189-348909	UP	PC5	OK	1.75476	94.8797	5.75676	5.26536	5e-05	0.0057242	yes
GSBRNA2T00111896001	BnaA03g29100D	GSBRNA2G00111896001	GSBRNA2G00111896001	chrA03:14139727-14142333	UP	PC5	OK	1.47063	79.9738	5.76502	6.50768	5e-05	0.0057242	yes
GSBRNA2T00005576001	BnaA01g26480D	GSBRNA2G00005576001	GSBRNA2G00005576001	chrA01:18549643-18553027	UP	PC5	OK	0.790954	43.2479	5.77289	6.33527	5e-05	0.0057242	yes
GSBRNA2T00128737001	BnaC07g19810D	GSBRNA2G00128737001	GSBRNA2G00128737001	chrC07:26565125-26566118	UP	PC5	OK	1.00477	54.9393	5.7729	4.94274	5e-05	0.0057242	yes
GSBRNA2T00055941001	BnaC03g62750D	GSBRNA2G00055941001	GSBRNA2G00055941001	chrC03:51995539-51996921	UP	PC5	OK	2.02571	111.166	5.77815	5.64066	5e-05	0.0057242	yes
GSBRNA2T00068766001	BnaA09g14940D	GSBRNA2G00068766001	GSBRNA2G00068766001	chrA09:8657963-8659223	UP	PC5	OK	0.926886	50.9835	5.78149	5.48252	5e-05	0.0057242	yes
GSBRNA2T00055435001	BnaA02g30620D	GSBRNA2G00055435001	GSBRNA2G00055435001	chrA02:22119789-22122345	UP	PC5	OK	4.83753	266.685	5.78472	6.30065	5e-05	0.0057242	yes
GSBRNA2T00153593001	BnaC03g32590D	GSBRNA2G00153593001	GSBRNA2G00153593001	chrC03:19989404-19990113	UP	PC5	OK	3.39533	187.232	5.78513	5.87618	5e-05	0.0057242	yes
GSBRNA2T00049666001	BnaC06g31750D	GSBRNA2G00049666001	GSBRNA2G00049666001	chrC06:32205319-32205690	UP	PC5	OK	18.0712	999.999	5.79016	6.74699	5e-05	0.0057242	yes
GSBRNA2T00053336001	BnaA04g27260D	GSBRNA2G00053336001	GSBRNA2G00053336001	chrA04_random:13561-14962	UP	PC5	OK	0.728438	40.3574	5.79188	4.968	0.00025	0.0211863	yes
GSBRNA2T00006585001	BnaC05g14670D	GSBRNA2G00006585001	GSBRNA2G00006585001	chrC05:8656458-8658208	UP	PC5	OK	0.555921	30.8302	5.79332	5.4021	0.0001	0.0100433	yes
GSBRNA2T00041321001	BnaCnng05770D	GSBRNA2G00041321001	GSBRNA2G00041321001	chrCnn_random:5346171-5348294	UP	PC5	OK	5.83708	323.753	5.7935	6.06883	5e-05	0.0057242	yes
GSBRNA2T00067730001	BnaC05g10650D	GSBRNA2G00067730001	GSBRNA2G00067730001	chrC05:6125134-6127180	UP	PC5	OK	3.58827	199.218	5.79492	6.39512	5e-05	0.0057242	yes
GSBRNA2T00093336001	BnaAnng31850D	GSBRNA2G00093336001	GSBRNA2G00093336001	chrAnn_random:36425122-36427929	UP	PC5	OK	0.833867	46.3373	5.79621	5.30029	5e-05	0.0057242	yes
GSBRNA2T00082682001	BnaC02g42230D	GSBRNA2G00082682001	GSBRNA2G00082682001	chrC02:44912864-44915189	UP	PC5	OK	0.540537	30.0665	5.79762	5.21504	5e-05	0.0057242	yes
GSBRNA2T00064714001	BnaC04g00460D	GSBRNA2G00064714001	GSBRNA2G00064714001	chrC04:370686-372710	UP	PC5	OK	5.8219	324.541	5.80077	5.96961	5e-05	0.0057242	yes
GSBRNA2T00035606001	BnaA06g13170D	GSBRNA2G00035606001	GSBRNA2G00035606001	chrA06:6893622-6895361	UP	PC5	OK	0.516719	28.8842	5.80476	5.30836	0.0001	0.0100433	yes
GSBRNA2T00019044001	BnaC03g22940D	GSBRNA2G00019044001	GSBRNA2G00019044001	chrC03:12717997-12719997	UP	PC5	OK	0.46463	26.1125	5.81251	5.14001	5e-05	0.0057242	yes
GSBRNA2T00138784001	BnaA03g22710D	GSBRNA2G00138784001	GSBRNA2G00138784001	chrA03:10799440-10801830	UP	PC5	OK	1.26709	71.5612	5.81958	6.52201	5e-05	0.0057242	yes
GSBRNA2T00124570001	BnaC06g15410D	GSBRNA2G00124570001	GSBRNA2G00124570001	chrC06:18076976-18080931	UP	PC5	OK	0.481018	27.1763	5.82011	5.23469	0.00015	0.0137633	yes
GSBRNA2T00058434001	BnaA03g19250D	GSBRNA2G00058434001	GSBRNA2G00058434001	chrA03:9095209-9097196	UP	PC5	OK	0.55525	31.3834	5.82072	5.34294	0.00035	0.0284996	yes
GSBRNA2T00145925001	BnaC09g03550D	GSBRNA2G00145925001	GSBRNA2G00145925001	chrC09:2044062-2044893	UP	PC5	OK	1.77864	100.92	5.8263	5.15721	5e-05	0.0057242	yes
GSBRNA2T00109435001	BnaC09g03330D	GSBRNA2G00109435001	GSBRNA2G00109435001	chrC09:1878892-1881342	UP	PC5	OK	0.385818	21.8984	5.82676	5.1945	5e-05	0.0057242	yes
GSBRNA2T00018283001	BnaC09g00590D	GSBRNA2G00018283001	GSBRNA2G00018283001	chrC09:293783-294242	UP	PC5	OK	2.68097	153.397	5.83837	5.38066	0.0004	0.0321514	yes
GSBRNA2T00059182001	BnaC03g58650D	GSBRNA2G00059182001	GSBRNA2G00059182001	chrC03:47932195-47933972	UP	PC5	OK	1.21025	69.3197	5.83989	6.14333	5e-05	0.0057242	yes
GSBRNA2T00092029001	BnaA08g04750D	GSBRNA2G00092029001	GSBRNA2G00092029001	chrA08:4558016-4559917	UP	PC5	OK	1.33606	76.6201	5.84167	5.94674	5e-05	0.0057242	yes
GSBRNA2T00029427001	BnaC01g29960D	GSBRNA2G00029427001	GSBRNA2G00029427001	chrC01:28368543-28370450	UP	PC5	OK	0.756913	43.4853	5.84426	5.27437	0.0001	0.0100433	yes
GSBRNA2T00101250001	BnaC01g33660D	GSBRNA2G00101250001	GSBRNA2G00101250001	chrC01:32860482-32863240	UP	PC5	OK	0.481424	27.8754	5.85554	4.80886	0.0001	0.0100433	yes
GSBRNA2T00123903001	BnaC03g39840D	GSBRNA2G00123903001	GSBRNA2G00123903001	chrC03:24856755-24858851	UP	PC5	OK	2.54751	147.847	5.85887	6.62959	5e-05	0.0057242	yes
GSBRNA2T00112084001	BnaA03g27560D	GSBRNA2G00112084001	GSBRNA2G00112084001	chrA03:13562108-13562743	UP	PC5	OK	4.3381	251.953	5.85995	5.79689	5e-05	0.0057242	yes
GSBRNA2T00064675001	BnaA10g05640D	GSBRNA2G00064675001	GSBRNA2G00064675001	chrA10:3437742-3438667	UP	PC5	OK	2.81794	163.817	5.8613	5.96657	5e-05	0.0057242	yes
GSBRNA2T00024068001	BnaC04g43840D	GSBRNA2G00024068001	GSBRNA2G00024068001	chrC04:44098354-44102576	UP	PC5	OK	0.321256	18.6927	5.86261	5.36209	0.0001	0.0100433	yes
GSBRNA2T00024443001	BnaC03g17520D	GSBRNA2G00024443001	GSBRNA2G00024443001	chrC03:8957043-8960297	UP	PC5	OK	0.708571	41.261	5.86372	6.12442	5e-05	0.0057242	yes
GSBRNA2T00113116001	BnaC02g28140D	GSBRNA2G00113116001	GSBRNA2G00113116001	chrC02:26444382-26445280	UP	PC5	OK	2.12857	123.967	5.86393	5.77381	5e-05	0.0057242	yes
GSBRNA2T00136391001	BnaA10g26020D	GSBRNA2G00136391001	GSBRNA2G00136391001	chrA10:16659270-16660991	UP	PC5	OK	1.6463	96.0681	5.86676	6.19009	5e-05	0.0057242	yes
GSBRNA2T00041437001	BnaA02g09800D	GSBRNA2G00041437001	GSBRNA2G00041437001	chrA02:4908408-4910182	UP	PC5	OK	0.51377	30.0536	5.87027	4.95877	0.0005	0.0394897	yes
GSBRNA2T00101719001	BnaC05g35370D	GSBRNA2G00101719001	GSBRNA2G00101719001	chrC05:34656836-34657873	UP	PC5	OK	1.18702	69.4411	5.87038	5.21215	5e-05	0.0057242	yes
GSBRNA2T00105252001	BnaA06g06610D	GSBRNA2G00105252001	GSBRNA2G00105252001	chrA06:3562211-3562718	UP	PC5	OK	4.38582	256.987	5.8727	4.96598	5e-05	0.0057242	yes
GSBRNA2T00146830001	BnaC02g31900D	GSBRNA2G00146830001	GSBRNA2G00146830001	chrC02:34338309-34339960	UP	PC5	OK	2.20356	129.131	5.87286	5.69024	5e-05	0.0057242	yes
GSBRNA2T00023808001	BnaC05g39970D	GSBRNA2G00023808001	GSBRNA2G00023808001	chrC05:38307762-38310436	UP	PC5	OK	5.40635	317.443	5.8757	6.06963	5e-05	0.0057242	yes
GSBRNA2T00129599001	BnaA09g34580D	GSBRNA2G00129599001	GSBRNA2G00129599001	chrA09:25318216-25322898	UP	PC5	OK	0.753905	44.3205	5.87745	6.11391	5e-05	0.0057242	yes
GSBRNA2T00126934001	BnaA08g08890D	GSBRNA2G00126934001	GSBRNA2G00126934001	chrA08:8613718-8614952	UP	PC5	OK	2.3039	135.456	5.87761	5.89429	5e-05	0.0057242	yes
GSBRNA2T00046831001	BnaC09g52000D	GSBRNA2G00046831001	GSBRNA2G00046831001	chrC09_random:1247514-1249888	UP	PC5	OK	2.784	164.762	5.88708	5.9077	5e-05	0.0057242	yes
GSBRNA2T00042563001	BnaA04g27680D	GSBRNA2G00042563001	GSBRNA2G00042563001	chrA04_random:218842-220395	UP	PC5	OK	0.938887	55.7067	5.89076	5.16049	0.00015	0.0137633	yes
GSBRNA2T00097432001	BnaAnng10550D	GSBRNA2G00097432001	GSBRNA2G00097432001	chrAnn_random:11467979-11469049	UP	PC5	OK	1.72395	102.808	5.89809	5.95897	5e-05	0.0057242	yes
GSBRNA2T00133996001	BnaC08g05510D	GSBRNA2G00133996001	GSBRNA2G00133996001	chrC08:7393684-7395545	UP	PC5	OK	0.787519	46.9691	5.89825	5.22536	5e-05	0.0057242	yes
GSBRNA2T00017673001	BnaA08g29220D	GSBRNA2G00017673001	GSBRNA2G00017673001	chrA08_random:69466-72262	UP	PC5	OK	1.74764	104.565	5.90285	6.56086	5e-05	0.0057242	yes
GSBRNA2T00063187001	BnaC06g12590D	GSBRNA2G00063187001	GSBRNA2G00063187001	chrC06:15163559-15166457	UP	PC5	OK	0.354741	21.2345	5.9035	5.3846	0.0001	0.0100433	yes
GSBRNA2T00021941001	BnaC04g48730D	GSBRNA2G00021941001	GSBRNA2G00021941001	chrC04:47239159-47241726	UP	PC5	OK	0.559999	33.7164	5.91188	5.11445	0.0002	0.0176378	yes
GSBRNA2T00103095001	BnaA08g23970D	GSBRNA2G00103095001	GSBRNA2G00103095001	chrA08:16932151-16934369	UP	PC5	OK	2.03509	122.772	5.91474	6.49752	5e-05	0.0057242	yes
GSBRNA2T00079391001	BnaA05g25890D	GSBRNA2G00079391001	GSBRNA2G00079391001	chrA05:19066481-19069161	UP	PC5	OK	4.89869	295.916	5.91665	6.11092	5e-05	0.0057242	yes
GSBRNA2T00050923001	BnaAnng21170D	GSBRNA2G00050923001	GSBRNA2G00050923001	chrAnn_random:23550039-23552691	UP	PC5	OK	0.976664	59.075	5.91854	6.31925	5e-05	0.0057242	yes
GSBRNA2T00008753001	BnaAnng12200D	GSBRNA2G00008753001	GSBRNA2G00008753001	chrAnn_random:13197917-13200091	UP	PC5	OK	1.06368	64.3486	5.91877	6.06148	5e-05	0.0057242	yes
GSBRNA2T00134749001	BnaC09g06650D	GSBRNA2G00134749001	GSBRNA2G00134749001	chrC09:4089007-4091216	UP	PC5	OK	0.732638	44.3891	5.92096	5.18806	0.0001	0.0100433	yes
GSBRNA2T00130944001	BnaC01g02960D	GSBRNA2G00130944001	GSBRNA2G00130944001	chrC01:1544537-1545293	UP	PC5	OK	1.77959	107.944	5.9226	5.35145	5e-05	0.0057242	yes
GSBRNA2T00008748001	BnaAnng12170D	GSBRNA2G00008748001	GSBRNA2G00008748001	chrAnn_random:13184824-13189220	UP	PC5	OK	0.444703	26.9871	5.92329	6.09425	5e-05	0.0057242	yes
GSBRNA2T00015860001	BnaC03g27410D	GSBRNA2G00015860001	GSBRNA2G00015860001	chrC03:15898419-15899631	UP	PC5	OK	0.594248	36.5718	5.94352	5.13961	0.0001	0.0100433	yes
GSBRNA2T00052472001	BnaA09g51020D	GSBRNA2G00052472001	GSBRNA2G00052472001	chrA09:33632579-33635046	UP	PC5	OK	0.496387	30.768	5.95382	5.61384	5e-05	0.0057242	yes
GSBRNA2T00092678001	BnaA03g50770D	GSBRNA2G00092678001	GSBRNA2G00092678001	chrA03:26372941-26375158	UP	PC5	OK	0.752611	47.0196	5.96522	5.77949	0.00015	0.0137633	yes
GSBRNA2T00032509001	BnaC03g70650D	GSBRNA2G00032509001	GSBRNA2G00032509001	chrC03:60268300-60271136	UP	PC5	OK	1.53123	95.7105	5.96592	6.58877	5e-05	0.0057242	yes
GSBRNA2T00031936001	BnaC05g03710D	GSBRNA2G00031936001	GSBRNA2G00031936001	chrC05:1805020-1808250	UP	PC5	OK	0.573053	36.0906	5.97681	5.97781	5e-05	0.0057242	yes
GSBRNA2T00156918001	BnaC07g36660D	GSBRNA2G00156918001	GSBRNA2G00156918001	chrC07:38634414-38637827	UP	PC5	OK	0.942699	59.4491	5.97871	6.54933	5e-05	0.0057242	yes
GSBRNA2T00078573001	BnaC02g01620D	GSBRNA2G00078573001	GSBRNA2G00078573001	chrC02:659607-661469	UP	PC5	OK	2.67953	168.989	5.9788	6.52296	5e-05	0.0057242	yes
GSBRNA2T00059842001	BnaC03g41680D	GSBRNA2G00059842001	GSBRNA2G00059842001	chrC03:26574668-26577368	UP	PC5	OK	0.624753	39.4328	5.97997	5.3094	0.00015	0.0137633	yes
GSBRNA2T00053804001	BnaC09g22170D	GSBRNA2G00053804001	GSBRNA2G00053804001	chrC09:19459400-19462525	UP	PC5	OK	3.12956	197.673	5.98101	6.60772	5e-05	0.0057242	yes
GSBRNA2T00005168001	BnaAnng11370D	GSBRNA2G00005168001	GSBRNA2G00005168001	chrAnn_random:12327596-12329902	UP	PC5	OK	2.81458	178.077	5.98344	6.15523	5e-05	0.0057242	yes
GSBRNA2T00057320001	BnaA09g41420D	GSBRNA2G00057320001	GSBRNA2G00057320001	chrA09:28945071-28948675	UP	PC5	OK	0.961743	60.9288	5.98533	5.95966	5e-05	0.0057242	yes
GSBRNA2T00087071001	BnaA10g03800D	GSBRNA2G00087071001	GSBRNA2G00087071001	chrA10:2024085-2027174	UP	PC5	OK	0.809677	51.3974	5.98821	6.19365	5e-05	0.0057242	yes
GSBRNA2T00071518001	BnaA03g53130D	GSBRNA2G00071518001	GSBRNA2G00071518001	chrA03:27788160-27792685	UP	PC5	OK	1.28014	81.5701	5.99366	6.94061	5e-05	0.0057242	yes
GSBRNA2T00098755001	BnaA07g16480D	GSBRNA2G00098755001	GSBRNA2G00098755001	chrA07:13925248-13929217	UP	PC5	OK	0.259998	16.5693	5.99386	5.16677	0.0001	0.0100433	yes
GSBRNA2T00133481001	BnaC07g30310D	GSBRNA2G00133481001	GSBRNA2G00133481001	chrC07:34854462-34855444	UP	PC5	OK	3.34149	212.95	5.99388	5.86085	5e-05	0.0057242	yes
GSBRNA2T00028596001	BnaA03g59650D	GSBRNA2G00028596001	GSBRNA2G00028596001	chrA03_random:3711565-3713635	UP	PC5	OK	0.904607	57.6909	5.99491	5.16035	0.0001	0.0100433	yes
GSBRNA2T00112072001	BnaA03g27650D	GSBRNA2G00112072001	GSBRNA2G00112072001	chrA03:13589757-13592422	UP	PC5	OK	0.31083	19.8301	5.99542	5.07373	0.0001	0.0100433	yes
GSBRNA2T00081694001	BnaA06g09240D	GSBRNA2G00081694001	GSBRNA2G00081694001	chrA06:4990237-4992243	UP	PC5	OK	2.2753	145.692	6.00073	6.58045	5e-05	0.0057242	yes
GSBRNA2T00034665001	BnaC03g73820D	GSBRNA2G00034665001	GSBRNA2G00034665001	chrC03_random:1813888-1817148	UP	PC5	OK	0.339097	21.7558	6.00356	5.26231	5e-05	0.0057242	yes
GSBRNA2T00132123001	BnaC06g18960D	GSBRNA2G00132123001	GSBRNA2G00132123001	chrC06:21314284-21317081	UP	PC5	OK	0.583026	37.6588	6.01329	5.33954	0.0002	0.0176378	yes
GSBRNA2T00115121001	BnaC04g25940D	GSBRNA2G00115121001	GSBRNA2G00115121001	chrC04:27173449-27177743	UP	PC5	OK	0.836284	54.1891	6.01787	6.32833	5e-05	0.0057242	yes
GSBRNA2T00147499001	BnaA06g26670D	GSBRNA2G00147499001	GSBRNA2G00147499001	chrA06:18318912-18319847	UP	PC5	OK	3.56939	231.513	6.01927	5.69936	5e-05	0.0057242	yes
GSBRNA2T00121417001	BnaA01g01830D	GSBRNA2G00121417001	GSBRNA2G00121417001	chrA01:941867-942626	UP	PC5	OK	1.88339	122.158	6.01928	5.37222	0.00015	0.0137633	yes
GSBRNA2T00153670001	BnaC03g33160D	GSBRNA2G00153670001	GSBRNA2G00153670001	chrC03:20253717-20256112	UP	PC5	OK	0.587529	38.1958	6.02261	5.61441	5e-05	0.0057242	yes
GSBRNA2T00066162001	BnaC03g26740D	GSBRNA2G00066162001	GSBRNA2G00066162001	chrC03:15296379-15298757	UP	PC5	OK	1.11729	72.6804	6.02349	6.26827	5e-05	0.0057242	yes
GSBRNA2T00143224001	BnaA02g02970D	GSBRNA2G00143224001	GSBRNA2G00143224001	chrA02:1313417-1315459	UP	PC5	OK	0.776188	50.5436	6.02498	5.23467	5e-05	0.0057242	yes
GSBRNA2T00142075001	BnaA03g14480D	GSBRNA2G00142075001	GSBRNA2G00142075001	chrA03:6666240-6669454	UP	PC5	OK	0.538763	35.2418	6.03149	5.75742	5e-05	0.0057242	yes
GSBRNA2T00137338001	BnaA03g35840D	GSBRNA2G00137338001	GSBRNA2G00137338001	chrA03:17499785-17502483	UP	PC5	OK	0.57409	37.7227	6.03801	5.485	5e-05	0.0057242	yes
GSBRNA2T00076300001	BnaC05g48590D	GSBRNA2G00076300001	GSBRNA2G00076300001	chrC05:43015086-43020684	UP	PC5	OK	0.21911	14.5039	6.04864	5.43383	0.00015	0.0137633	yes
GSBRNA2T00132966001	BnaA05g00810D	GSBRNA2G00132966001	GSBRNA2G00132966001	chrA05:471115-475305	UP	PC5	OK	2.72333	180.513	6.05059	6.21161	5e-05	0.0057242	yes
GSBRNA2T00008436001	BnaC03g73850D	GSBRNA2G00008436001	GSBRNA2G00008436001	chrC03_random:1882002-1885293	UP	PC5	OK	0.384333	25.5419	6.05437	5.2631	5e-05	0.0057242	yes
GSBRNA2T00057413001	BnaA09g47760D	GSBRNA2G00057413001	GSBRNA2G00057413001	chrA09:32145667-32146174	UP	PC5	OK	6.83848	456.47	6.0607	5.81289	5e-05	0.0057242	yes
GSBRNA2T00114961001	BnaC02g11010D	GSBRNA2G00114961001	GSBRNA2G00114961001	chrC02:6390677-6393782	UP	PC5	OK	0.720111	48.1446	6.06301	6.34583	5e-05	0.0057242	yes
GSBRNA2T00138908001	BnaA03g21600D	GSBRNA2G00138908001	GSBRNA2G00138908001	chrA03:10239150-10239801	UP	PC5	OK	3.03418	204.534	6.07489	6.07862	5e-05	0.0057242	yes
GSBRNA2T00105340001	BnaA06g07350D	GSBRNA2G00105340001	GSBRNA2G00105340001	chrA06:3910318-3911914	UP	PC5	OK	1.1602	78.3898	6.07822	6.1442	5e-05	0.0057242	yes
GSBRNA2T00111559001	BnaA03g31930D	GSBRNA2G00111559001	GSBRNA2G00111559001	chrA03:15420095-15421395	UP	PC5	OK	1.02189	69.2019	6.0815	5.40765	0.0001	0.0100433	yes
GSBRNA2T00148820001	BnaA03g08850D	GSBRNA2G00148820001	GSBRNA2G00148820001	chrA03:4014805-4015543	UP	PC5	OK	6.15287	417.316	6.08374	6.47423	5e-05	0.0057242	yes
GSBRNA2T00093597001	BnaA02g27380D	GSBRNA2G00093597001	GSBRNA2G00093597001	chrA02:20184060-20186383	UP	PC5	OK	1.39913	95.2715	6.08945	6.2028	5e-05	0.0057242	yes
GSBRNA2T00041326001	BnaCnng05800D	GSBRNA2G00041326001	GSBRNA2G00041326001	chrCnn_random:5354794-5361680	UP	PC5	OK	1.62328	110.623	6.0906	6.35859	5e-05	0.0057242	yes
GSBRNA2T00092679001	BnaA03g50780D	GSBRNA2G00092679001	GSBRNA2G00092679001	chrA03:26376351-26378241	UP	PC5	OK	0.404906	27.6352	6.09277	4.90489	0.0001	0.0100433	yes
GSBRNA2T00082566001	BnaCnng61530D	GSBRNA2G00082566001	GSBRNA2G00082566001	chrCnn_random:61392546-61395401	UP	PC5	OK	0.338695	23.3436	6.1069	5.35096	0.0001	0.0100433	yes
GSBRNA2T00140403001	BnaC03g06470D	GSBRNA2G00140403001	GSBRNA2G00140403001	chrC03:3114002-3114431	UP	PC5	OK	5.45652	379.353	6.11942	5.00405	5e-05	0.0057242	yes
GSBRNA2T00016772001	BnaA02g36510D	GSBRNA2G00016772001	GSBRNA2G00016772001	chrA02_random:996219-997101	UP	PC5	OK	3.42963	238.732	6.12119	5.92191	5e-05	0.0057242	yes
GSBRNA2T00082473001	BnaCnng13510D	GSBRNA2G00082473001	GSBRNA2G00082473001	chrCnn_random:12263113-12265791	UP	PC5	OK	1.57367	110.226	6.13018	6.64607	5e-05	0.0057242	yes
GSBRNA2T00005599001	BnaA01g26320D	GSBRNA2G00005599001	GSBRNA2G00005599001	chrA01:18388708-18391231	UP	PC5	OK	0.594788	41.6682	6.13043	5.30341	5e-05	0.0057242	yes
GSBRNA2T00034378001	BnaC03g76390D	GSBRNA2G00034378001	GSBRNA2G00034378001	chrC03_random:5028567-5029362	UP	PC5	OK	1.11251	77.9861	6.13133	5.10768	0.00015	0.0137633	yes
GSBRNA2T00117797001	BnaA09g19110D	GSBRNA2G00117797001	GSBRNA2G00117797001	chrA09:12016068-12017988	UP	PC5	OK	0.81527	57.2429	6.13367	5.64722	0.00015	0.0137633	yes
GSBRNA2T00023642001	BnaA03g58460D	GSBRNA2G00023642001	GSBRNA2G00023642001	chrA03_random:1696868-1700308	UP	PC5	OK	0.8179	57.4717	6.13478	6.353	5e-05	0.0057242	yes
GSBRNA2T00130773001	BnaC01g04350D	GSBRNA2G00130773001	GSBRNA2G00130773001	chrC01:2275873-2278006	UP	PC5	OK	1.71141	120.263	6.13487	6.6878	5e-05	0.0057242	yes
GSBRNA2T00144294001	BnaA06g29240D	GSBRNA2G00144294001	GSBRNA2G00144294001	chrA06:19969923-19971443	UP	PC5	OK	1.12737	79.2612	6.13558	5.25377	5e-05	0.0057242	yes
GSBRNA2T00073954001	BnaA01g05340D	GSBRNA2G00073954001	GSBRNA2G00073954001	chrA01:2506614-2509194	UP	PC5	OK	0.422586	30.1448	6.15652	5.64199	5e-05	0.0057242	yes
GSBRNA2T00102084001	BnaA07g26840D	GSBRNA2G00102084001	GSBRNA2G00102084001	chrA07:19612216-19613302	UP	PC5	OK	0.535567	38.2075	6.15664	5.05993	0.00035	0.0284996	yes
GSBRNA2T00066886001	BnaAnng25230D	GSBRNA2G00066886001	GSBRNA2G00066886001	chrAnn_random:29253826-29255946	UP	PC5	OK	0.517274	37.327	6.17315	5.78659	0.0001	0.0100433	yes
GSBRNA2T00121277001	BnaA01g03090D	GSBRNA2G00121277001	GSBRNA2G00121277001	chrA01:1492366-1494367	UP	PC5	OK	2.06151	148.951	6.17499	7.0888	5e-05	0.0057242	yes
GSBRNA2T00120565001	BnaC02g39350D	GSBRNA2G00120565001	GSBRNA2G00120565001	chrC02:42281995-42284945	UP	PC5	OK	0.265046	19.1985	6.17861	5.3967	5e-05	0.0057242	yes
GSBRNA2T00039631001	BnaCnng42690D	GSBRNA2G00039631001	GSBRNA2G00039631001	chrCnn_random:41740410-41742712	UP	PC5	OK	0.502025	36.5107	6.18441	6.05198	5e-05	0.0057242	yes
GSBRNA2T00128546001	BnaC07g18740D	GSBRNA2G00128546001	GSBRNA2G00128546001	chrC07:25406272-25407506	UP	PC5	OK	3.28881	239.742	6.18777	6.73186	5e-05	0.0057242	yes
GSBRNA2T00098887001	BnaA07g17460D	GSBRNA2G00098887001	GSBRNA2G00098887001	chrA07:14618299-14618999	UP	PC5	OK	4.5974	336.006	6.19153	7.61748	5e-05	0.0057242	yes
GSBRNA2T00004423001	BnaC03g77110D	GSBRNA2G00004423001	GSBRNA2G00004423001	chrC03_random:5673744-5675889	UP	PC5	OK	1.2017	88.3079	6.19939	6.12662	5e-05	0.0057242	yes
GSBRNA2T00099054001	BnaA07g18960D	GSBRNA2G00099054001	GSBRNA2G00099054001	chrA07:15274873-15277625	UP	PC5	OK	1.31598	98.3655	6.22395	6.54669	5e-05	0.0057242	yes
GSBRNA2T00091526001	BnaC07g27480D	GSBRNA2G00091526001	GSBRNA2G00091526001	chrC07:32987070-32988476	UP	PC5	OK	0.948653	71.0666	6.22715	5.41041	5e-05	0.0057242	yes
GSBRNA2T00004537001	BnaA08g11700D	GSBRNA2G00004537001	GSBRNA2G00004537001	chrA08:10533745-10535728	UP	PC5	OK	1.45778	109.448	6.23033	6.75172	5e-05	0.0057242	yes
GSBRNA2T00120948001	BnaA10g05950D	GSBRNA2G00120948001	GSBRNA2G00120948001	chrA10:4165809-4167704	UP	PC5	OK	0.453313	34.3834	6.24506	5.41622	0.0003	0.024916	yes
GSBRNA2T00132279001	BnaC03g18640D	GSBRNA2G00132279001	GSBRNA2G00132279001	chrC03:9542708-9547073	UP	PC5	OK	0.229722	17.8527	6.28011	5.37097	0.0001	0.0100433	yes
GSBRNA2T00077251001	BnaAnng07690D	GSBRNA2G00077251001	GSBRNA2G00077251001	chrAnn_random:7427276-7429367	UP	PC5	OK	0.94994	74.1379	6.28623	5.66897	0.00015	0.0137633	yes
GSBRNA2T00111935001	BnaA03g28740D	GSBRNA2G00111935001	GSBRNA2G00111935001	chrA03:14000826-14002404	UP	PC5	OK	2.76785	217.24	6.29438	6.57294	5e-05	0.0057242	yes
GSBRNA2T00086893001	BnaAnng08580D	GSBRNA2G00086893001	GSBRNA2G00086893001	chrAnn_random:9056399-9059481	UP	PC5	OK	0.36679	28.8181	6.29588	5.24193	0.0001	0.0100433	yes
GSBRNA2T00025694001	BnaC08g50100D	GSBRNA2G00025694001	GSBRNA2G00025694001	chrC08_random:4485976-4489932	UP	PC5	OK	0.31217	25.4949	6.35174	5.72393	5e-05	0.0057242	yes
GSBRNA2T00089546001	BnaCnng64550D	GSBRNA2G00089546001	GSBRNA2G00089546001	chrCnn_random:64319926-64322246	UP	PC5	OK	0.973747	82.6061	6.40656	6.81071	5e-05	0.0057242	yes
GSBRNA2T00065417001	BnaC02g06390D	GSBRNA2G00065417001	GSBRNA2G00065417001	chrC02:3417337-3419373	UP	PC5	OK	0.459547	39.2936	6.41794	5.57004	0.00015	0.0137633	yes
GSBRNA2T00095197001	BnaA05g10500D	GSBRNA2G00095197001	GSBRNA2G00095197001	chrA05:5743578-5747863	UP	PC5	OK	0.550682	48.0103	6.44598	6.66214	5e-05	0.0057242	yes
GSBRNA2T00090546001	BnaC08g40000D	GSBRNA2G00090546001	GSBRNA2G00090546001	chrC08:35413816-35416638	UP	PC5	OK	0.402806	38.2071	6.56761	5.47448	0.00015	0.0137633	yes
GSBRNA2T00009018001	BnaC04g11500D	GSBRNA2G00009018001	GSBRNA2G00009018001	chrC04:8987934-8991938	UP	PC5	OK	0.479182	48.936	6.67418	6.58347	5e-05	0.0057242	yes
GSBRNA2T00055207001	BnaA09g45930D	GSBRNA2G00055207001	GSBRNA2G00055207001	chrA09:31302568-31304884	UP	PC5	OK	0.379471	40.9181	6.75261	5.73674	0.00035	0.0284996	yes
GSBRNA2T00008166001	BnaAnng35410D	GSBRNA2G00008166001	GSBRNA2G00008166001	chrAnn_random:40135194-40136341	UP	PC5	OK	1.41369	153.744	6.76491	5.50367	5e-05	0.0057242	yes
GSBRNA2T00049050001	BnaC06g23370D	GSBRNA2G00049050001	GSBRNA2G00049050001	chrC06:25252072-25257113	UP	PC5	OK	0.202973	22.6771	6.80381	6.06439	0.00015	0.0137633	yes

## Sheet: UP VS PC10
test_id	Bna_gene_id	gene_id	gene	locus	sample_1	sample_2	status	value_1	value_2	log2(fold_change)	test_stat	p_value	q_value	significant
GSBRNA2T00019633001	BnaCnng30450D	GSBRNA2G00019633001	GSBRNA2G00019633001	chrCnn_random:28963812-28966966	UP	PC10	OK	14.6032	3.94514	-1.88814	-2.70458	0.0001	0.0133125	yes
GSBRNA2T00130956001	BnaC01g02870D	GSBRNA2G00130956001	GSBRNA2G00130956001	chrC01:1511473-1523983	UP	PC10	OK	1.81773	5.21111	1.51945	2.52889	0.00045	0.0441794	yes
GSBRNA2T00108084001	BnaC04g33430D	GSBRNA2G00108084001	GSBRNA2G00108084001	chrC04:35061282-35064864	UP	PC10	OK	5.14798	15.8391	1.62141	2.60442	0.0002	0.023	yes
GSBRNA2T00033770001	BnaA08g30600D	GSBRNA2G00033770001	GSBRNA2G00033770001	chrA08_random:1606091-1607737	UP	PC10	OK	8.20489	25.3143	1.6254	2.51571	0.00045	0.0441794	yes
GSBRNA2T00126852001	BnaA08g09560D	GSBRNA2G00126852001	GSBRNA2G00126852001	chrA08:9118332-9120819	UP	PC10	OK	10.8913	34.3058	1.65527	2.75485	0.00015	0.0183254	yes
GSBRNA2T00138114001	BnaC01g12360D	GSBRNA2G00138114001	GSBRNA2G00138114001	chrC01:7831974-7834255	UP	PC10	OK	37.6085	119.161	1.66379	2.79911	0.0001	0.0133125	yes
GSBRNA2T00115339001	BnaC07g22030D	GSBRNA2G00115339001	GSBRNA2G00115339001	chrC07:28550782-28553655	UP	PC10	OK	21.6259	68.9604	1.67301	2.79181	0.0002	0.023	yes
GSBRNA2T00001953001	BnaA06g35470D	GSBRNA2G00001953001	GSBRNA2G00001953001	chrA06:23305119-23307528	UP	PC10	OK	12.9234	41.5315	1.68422	2.85225	0.0001	0.0133125	yes
GSBRNA2T00140791001	BnaC03g09740D	GSBRNA2G00140791001	GSBRNA2G00140791001	chrC03:4686940-4689410	UP	PC10	OK	12.2238	40.4952	1.72805	2.95084	5e-05	0.00749083	yes
GSBRNA2T00131539001	BnaA01g10780D	GSBRNA2G00131539001	GSBRNA2G00131539001	chrA01:5392561-5394801	UP	PC10	OK	10.5306	36.1379	1.77893	3.0383	5e-05	0.00749083	yes
GSBRNA2T00151221001	BnaA03g41960D	GSBRNA2G00151221001	GSBRNA2G00151221001	chrA03:21074015-21079798	UP	PC10	OK	10.5574	37.966	1.84645	3.04276	5e-05	0.00749083	yes
GSBRNA2T00042766001	BnaA02g35880D	GSBRNA2G00042766001	GSBRNA2G00042766001	chrA02_random:590037-593386	UP	PC10	OK	9.51055	34.4554	1.85713	3.00857	5e-05	0.00749083	yes
GSBRNA2T00018531001	BnaC01g39610D	GSBRNA2G00018531001	GSBRNA2G00018531001	chrC01:38241332-38243163	UP	PC10	OK	5.71882	20.7242	1.85753	2.70408	0.00045	0.0441794	yes
GSBRNA2T00064716001	BnaC04g00440D	GSBRNA2G00064716001	GSBRNA2G00064716001	chrC04:365363-366014	UP	PC10	OK	64.8265	238.719	1.88066	2.88839	0.00015	0.0183254	yes
GSBRNA2T00102941001	BnaA08g22690D	GSBRNA2G00102941001	GSBRNA2G00102941001	chrA08:16403572-16404911	UP	PC10	OK	5.71753	21.0554	1.88073	2.70474	0.00035	0.0358713	yes
GSBRNA2T00127643001	BnaC04g38620D	GSBRNA2G00127643001	GSBRNA2G00127643001	chrC04:39815361-39816307	UP	PC10	OK	9.39138	35.2468	1.90809	2.58921	0.0003	0.0315386	yes
GSBRNA2T00048010001	BnaC08g46700D	GSBRNA2G00048010001	GSBRNA2G00048010001	chrC08_random:945064-946978	UP	PC10	OK	6.59093	24.9507	1.92052	3.01583	5e-05	0.00749083	yes
GSBRNA2T00141491001	BnaC03g51470D	GSBRNA2G00141491001	GSBRNA2G00141491001	chrC03:36041198-36046903	UP	PC10	OK	4.93286	18.7448	1.92599	3.20501	5e-05	0.00749083	yes
GSBRNA2T00079135001	BnaC03g21360D	GSBRNA2G00079135001	GSBRNA2G00079135001	chrC03:11540402-11542689	UP	PC10	OK	3.87038	14.8156	1.93657	2.71591	0.0004	0.0402382	yes
GSBRNA2T00137580001	BnaA03g33790D	GSBRNA2G00137580001	GSBRNA2G00137580001	chrA03:16358257-16359218	UP	PC10	OK	13.9687	53.7847	1.945	2.58511	0.0002	0.023	yes
GSBRNA2T00141899001	BnaA03g16020D	GSBRNA2G00141899001	GSBRNA2G00141899001	chrA03:7407851-7409946	UP	PC10	OK	10.2308	39.6562	1.95462	2.93991	0.0002	0.023	yes
GSBRNA2T00149293001	BnaA04g00410D	GSBRNA2G00149293001	GSBRNA2G00149293001	chrA04:240976-243984	UP	PC10	OK	45.1961	176.304	1.96379	2.58424	0.00045	0.0441794	yes
GSBRNA2T00060745001	BnaC03g13310D	GSBRNA2G00060745001	GSBRNA2G00060745001	chrC03:6446695-6449759	UP	PC10	OK	3.95628	16.2686	2.03987	2.9189	0.0002	0.023	yes
GSBRNA2T00139858001	BnaC08g16080D	GSBRNA2G00139858001	GSBRNA2G00139858001	chrC08:20257415-20259058	UP	PC10	OK	6.16347	26.0763	2.08093	3.03131	0.00035	0.0358713	yes
GSBRNA2T00085280001	BnaC03g44780D	GSBRNA2G00085280001	GSBRNA2G00085280001	chrC03:29892346-29896303	UP	PC10	OK	1.31119	5.57889	2.0891	2.75548	0.0003	0.0315386	yes
GSBRNA2T00068566001	BnaA09g10210D	GSBRNA2G00068566001	GSBRNA2G00068566001	chrA09:5224630-5229616	UP	PC10	OK	1.21767	5.2082	2.09666	2.80028	0.0003	0.0315386	yes
GSBRNA2T00075848001	BnaA03g11700D	GSBRNA2G00075848001	GSBRNA2G00075848001	chrA03:5260774-5264151	UP	PC10	OK	4.01775	17.592	2.13046	3.08328	5e-05	0.00749083	yes
GSBRNA2T00023444001	BnaA02g16460D	GSBRNA2G00023444001	GSBRNA2G00023444001	chrA02:9798811-9799775	UP	PC10	OK	23.7236	105.551	2.15354	3.60137	5e-05	0.00749083	yes
GSBRNA2T00120717001	BnaC02g38360D	GSBRNA2G00120717001	GSBRNA2G00120717001	chrC02:41340976-41342766	UP	PC10	OK	6.04405	27.3372	2.17728	3.14429	5e-05	0.00749083	yes
GSBRNA2T00137371001	BnaA03g35520D	GSBRNA2G00137371001	GSBRNA2G00137371001	chrA03:17345517-17348242	UP	PC10	OK	5.08361	23.2032	2.1904	3.37004	5e-05	0.00749083	yes
GSBRNA2T00032751001	BnaC09g11360D	GSBRNA2G00032751001	GSBRNA2G00032751001	chrC09:7929484-7936144	UP	PC10	OK	1.75434	8.03981	2.19624	3.03981	5e-05	0.00749083	yes
GSBRNA2T00071173001	BnaC09g24050D	GSBRNA2G00071173001	GSBRNA2G00071173001	chrC09:21919281-21921373	UP	PC10	OK	3.3319	15.3162	2.20065	2.8407	0.00045	0.0441794	yes
GSBRNA2T00075294001	BnaA03g47910D	GSBRNA2G00075294001	GSBRNA2G00075294001	chrA03:24653637-24656658	UP	PC10	OK	16.8634	77.7434	2.20482	3.36719	5e-05	0.00749083	yes
GSBRNA2T00094996001	BnaA08g03920D	GSBRNA2G00094996001	GSBRNA2G00094996001	chrA08:3231532-3233325	UP	PC10	OK	3.67061	17.9113	2.28678	3.23565	5e-05	0.00749083	yes
GSBRNA2T00052216001	BnaAnng21760D	GSBRNA2G00052216001	GSBRNA2G00052216001	chrAnn_random:24185721-24188357	UP	PC10	OK	11.0861	55.679	2.32838	3.93119	5e-05	0.00749083	yes
GSBRNA2T00056416001	BnaA09g11080D	GSBRNA2G00056416001	GSBRNA2G00056416001	chrA09:5704449-5711109	UP	PC10	OK	1.25708	6.34752	2.33612	3.12778	0.00015	0.0183254	yes
GSBRNA2T00106108001	BnaC05g38940D	GSBRNA2G00106108001	GSBRNA2G00106108001	chrC05:37493099-37504117	UP	PC10	OK	11.779	59.6306	2.33983	2.90276	0.00025	0.0273993	yes
GSBRNA2T00102200001	BnaA07g25880D	GSBRNA2G00102200001	GSBRNA2G00102200001	chrA07:19119390-19120686	UP	PC10	OK	2.88351	14.7974	2.35944	2.93499	0.0003	0.0315386	yes
GSBRNA2T00122954001	BnaA10g05260D	GSBRNA2G00122954001	GSBRNA2G00122954001	chrA10:3001257-3005403	UP	PC10	OK	2.63509	13.6835	2.37652	3.29515	5e-05	0.00749083	yes
GSBRNA2T00150246001	BnaA10g02860D	GSBRNA2G00150246001	GSBRNA2G00150246001	chrA10:1480358-1483999	UP	PC10	OK	0.855774	4.47455	2.38644	2.85853	0.00025	0.0273993	yes
GSBRNA2T00082174001	BnaCnng12640D	GSBRNA2G00082174001	GSBRNA2G00082174001	chrCnn_random:11838741-11842019	UP	PC10	OK	34.9686	184.023	2.39575	3.39342	5e-05	0.00749083	yes
GSBRNA2T00108289001	BnaC02g36110D	GSBRNA2G00108289001	GSBRNA2G00108289001	chrC02:39194921-39196047	UP	PC10	OK	74.0866	392.336	2.40481	3.86903	5e-05	0.00749083	yes
GSBRNA2T00017233001	BnaC08g46150D	GSBRNA2G00017233001	GSBRNA2G00017233001	chrC08_random:50570-52783	UP	PC10	OK	4.0057	21.3628	2.41498	3.12061	5e-05	0.00749083	yes
GSBRNA2T00034574001	BnaC07g49750D	GSBRNA2G00034574001	GSBRNA2G00034574001	chrC07_random:2175682-2177797	UP	PC10	OK	2.07036	11.1276	2.42619	2.94273	0.00025	0.0273993	yes
GSBRNA2T00055882001	BnaC03g27970D	GSBRNA2G00055882001	GSBRNA2G00055882001	chrC03:16339160-16341317	UP	PC10	OK	2.59353	13.993	2.43172	3.34347	5e-05	0.00749083	yes
GSBRNA2T00142853001	BnaC07g25330D	GSBRNA2G00142853001	GSBRNA2G00142853001	chrC07:31475071-31477711	UP	PC10	OK	2.80294	15.3179	2.4502	3.11136	0.00035	0.0358713	yes
GSBRNA2T00063754001	BnaCnng08080D	GSBRNA2G00063754001	GSBRNA2G00063754001	chrCnn_random:7469653-7473057	UP	PC10	OK	5.98604	32.7994	2.454	3.84561	5e-05	0.00749083	yes
GSBRNA2T00047657001	BnaC03g63960D	GSBRNA2G00047657001	GSBRNA2G00047657001	chrC03:53450631-53452738	UP	PC10	OK	6.42714	35.3959	2.46134	3.60731	5e-05	0.00749083	yes
GSBRNA2T00076127001	BnaA05g32340D	GSBRNA2G00076127001	GSBRNA2G00076127001	chrA05:22135673-22138998	UP	PC10	OK	1.20954	6.88509	2.50902	2.86152	0.0004	0.0402382	yes
GSBRNA2T00101740001	BnaC05g35510D	GSBRNA2G00101740001	GSBRNA2G00101740001	chrC05:34873172-34878384	UP	PC10	OK	2.83521	16.2338	2.51747	3.71385	5e-05	0.00749083	yes
GSBRNA2T00124689001	BnaC06g14690D	GSBRNA2G00124689001	GSBRNA2G00124689001	chrC06:17442236-17443353	UP	PC10	OK	11.2508	64.7871	2.52568	3.17258	5e-05	0.00749083	yes
GSBRNA2T00121425001	BnaA01g01750D	GSBRNA2G00121425001	GSBRNA2G00121425001	chrA01:912922-924258	UP	PC10	OK	1.23338	7.15316	2.53596	3.97662	5e-05	0.00749083	yes
GSBRNA2T00035639001	BnaA06g12890D	GSBRNA2G00035639001	GSBRNA2G00035639001	chrA06:6755498-6756866	UP	PC10	OK	2.34777	13.8787	2.56351	3.01319	0.0001	0.0133125	yes
GSBRNA2T00154770001	BnaA03g36390D	GSBRNA2G00154770001	GSBRNA2G00154770001	chrA03:17814355-17816156	UP	PC10	OK	7.55679	45.958	2.60447	3.98503	5e-05	0.00749083	yes
GSBRNA2T00026392001	BnaC03g42260D	GSBRNA2G00026392001	GSBRNA2G00026392001	chrC03:27048428-27050334	UP	PC10	OK	6.52311	40.0643	2.61869	3.80731	5e-05	0.00749083	yes
GSBRNA2T00090674001	BnaA09g29520D	GSBRNA2G00090674001	GSBRNA2G00090674001	chrA09:22102586-22106808	UP	PC10	OK	2.64288	16.3771	2.6315	3.21421	0.0001	0.0133125	yes
GSBRNA2T00077447001	BnaC09g33580D	GSBRNA2G00077447001	GSBRNA2G00077447001	chrC09:36872443-36876313	UP	PC10	OK	2.99958	18.6437	2.63585	3.76113	5e-05	0.00749083	yes
GSBRNA2T00153882001	BnaA05g22270D	GSBRNA2G00153882001	GSBRNA2G00153882001	chrA05:17024725-17030088	UP	PC10	OK	4.59434	28.6422	2.64021	4.23269	5e-05	0.00749083	yes
GSBRNA2T00122822001	BnaA10g04370D	GSBRNA2G00122822001	GSBRNA2G00122822001	chrA10:2298603-2301709	UP	PC10	OK	4.22167	26.541	2.65234	3.5111	5e-05	0.00749083	yes
GSBRNA2T00155905001	BnaC08g27710D	GSBRNA2G00155905001	GSBRNA2G00155905001	chrC08:28611161-28612025	UP	PC10	OK	2.93195	18.4787	2.65593	2.83051	0.00035	0.0358713	yes
GSBRNA2T00144552001	BnaA06g31290D	GSBRNA2G00144552001	GSBRNA2G00144552001	chrA06:21065185-21067780	UP	PC10	OK	2.34125	15.0601	2.68538	3.15153	0.0005	0.048505	yes
GSBRNA2T00100301001	BnaC07g47300D	GSBRNA2G00100301001	GSBRNA2G00100301001	chrC07:44591927-44595165	UP	PC10	OK	0.756985	4.87749	2.6878	2.92203	0.00045	0.0441794	yes
GSBRNA2T00136135001	BnaA10g23860D	GSBRNA2G00136135001	GSBRNA2G00136135001	chrA10:15680728-15682706	UP	PC10	OK	2.71274	17.8445	2.71766	3.1954	5e-05	0.00749083	yes
GSBRNA2T00155183001	BnaC04g46690D	GSBRNA2G00155183001	GSBRNA2G00155183001	chrC04:45921785-45931498	UP	PC10	OK	2.69983	18.0197	2.73864	3.76534	5e-05	0.00749083	yes
GSBRNA2T00121376001	BnaA01g02230D	GSBRNA2G00121376001	GSBRNA2G00121376001	chrA01:1142698-1147072	UP	PC10	OK	7.00828	48.062	2.77776	4.15575	5e-05	0.00749083	yes
GSBRNA2T00096582001	BnaCnng66900D	GSBRNA2G00096582001	GSBRNA2G00096582001	chrCnn_random:66590503-66592591	UP	PC10	OK	4.13589	28.5713	2.7883	3.70206	5e-05	0.00749083	yes
GSBRNA2T00045443001	BnaC09g47860D	GSBRNA2G00045443001	GSBRNA2G00045443001	chrC09:46983331-46985296	UP	PC10	OK	17.4239	120.434	2.7891	4.2491	5e-05	0.00749083	yes
GSBRNA2T00019696001	BnaCnng30550D	GSBRNA2G00019696001	GSBRNA2G00019696001	chrCnn_random:29036251-29039848	UP	PC10	OK	6.83226	48.4748	2.8268	3.9736	5e-05	0.00749083	yes
GSBRNA2T00031454001	BnaC07g33060D	GSBRNA2G00031454001	GSBRNA2G00031454001	chrC07:36390301-36396061	UP	PC10	OK	5.93396	42.713	2.84761	4.25754	5e-05	0.00749083	yes
GSBRNA2T00132968001	BnaA05g00800D	GSBRNA2G00132968001	GSBRNA2G00132968001	chrA05:467360-468011	UP	PC10	OK	35.9156	271.909	2.92044	4.51803	5e-05	0.00749083	yes
GSBRNA2T00010143001	BnaC09g30110D	GSBRNA2G00010143001	GSBRNA2G00010143001	chrC09:32881286-32882230	UP	PC10	OK	107.418	831.642	2.95272	3.15009	0.0002	0.023	yes
GSBRNA2T00074261001	BnaCnng59120D	GSBRNA2G00074261001	GSBRNA2G00074261001	chrCnn_random:58787830-58790301	UP	PC10	OK	0.666169	5.21442	2.96855	2.97491	0.00045	0.0441794	yes
GSBRNA2T00150687001	BnaA08g18320D	GSBRNA2G00150687001	GSBRNA2G00150687001	chrA08:14362176-14363947	UP	PC10	OK	2.89823	22.8754	2.98055	3.4423	5e-05	0.00749083	yes
GSBRNA2T00111939001	BnaA03g28700D	GSBRNA2G00111939001	GSBRNA2G00111939001	chrA03:13988824-13990887	UP	PC10	OK	1.2697	10.6318	3.06583	3.19979	0.0005	0.048505	yes
GSBRNA2T00113509001	BnaA03g40500D	GSBRNA2G00113509001	GSBRNA2G00113509001	chrA03:20235011-20236815	UP	PC10	OK	2.63185	22.5127	3.09659	3.29184	0.00045	0.0441794	yes
GSBRNA2T00149065001	BnaA04g02260D	GSBRNA2G00149065001	GSBRNA2G00149065001	chrA04:1462057-1462243	UP	PC10	OK	86.4994	747.062	3.11047	3.22534	0.0005	0.048505	yes
GSBRNA2T00053102001	BnaC02g12030D	GSBRNA2G00053102001	GSBRNA2G00053102001	chrC02:7422997-7427787	UP	PC10	OK	6.01443	52.7386	3.13236	4.73614	5e-05	0.00749083	yes
GSBRNA2T00057374001	BnaA09g47460D	GSBRNA2G00057374001	GSBRNA2G00057374001	chrA09:31990455-31992915	UP	PC10	OK	2.72259	23.8999	3.13396	3.97305	5e-05	0.00749083	yes
GSBRNA2T00148620001	BnaA03g10620D	GSBRNA2G00148620001	GSBRNA2G00148620001	chrA03:4795742-4799004	UP	PC10	OK	4.17109	37.5249	3.16935	4.4977	5e-05	0.00749083	yes
GSBRNA2T00087127001	BnaA06g38950D	GSBRNA2G00087127001	GSBRNA2G00087127001	chrA06_random:1037202-1038178	UP	PC10	OK	6.28418	56.7304	3.17433	3.93525	5e-05	0.00749083	yes
GSBRNA2T00107391001	BnaC05g33160D	GSBRNA2G00107391001	GSBRNA2G00107391001	chrC05:32659895-32660958	UP	PC10	OK	2.9445	26.76	3.18398	3.66019	5e-05	0.00749083	yes
GSBRNA2T00116783001	BnaA05g05550D	GSBRNA2G00116783001	GSBRNA2G00116783001	chrA05:2903352-2908788	UP	PC10	OK	2.3827	21.6788	3.18562	4.25177	5e-05	0.00749083	yes
GSBRNA2T00001337001	BnaA02g05410D	GSBRNA2G00001337001	GSBRNA2G00001337001	chrA02:2480806-2483472	UP	PC10	OK	3.37393	30.8637	3.19341	4.25018	5e-05	0.00749083	yes
GSBRNA2T00076367001	BnaC03g58910D	GSBRNA2G00076367001	GSBRNA2G00076367001	chrC03:48164432-48165553	UP	PC10	OK	3.31343	30.7513	3.21425	3.43442	0.00045	0.0441794	yes
GSBRNA2T00072371001	BnaA09g18340D	GSBRNA2G00072371001	GSBRNA2G00072371001	chrA09:11423248-11428344	UP	PC10	OK	2.15866	20.8067	3.26884	3.85711	5e-05	0.00749083	yes
GSBRNA2T00137084001	BnaC02g22250D	GSBRNA2G00137084001	GSBRNA2G00137084001	chrC02:19100902-19101865	UP	PC10	OK	7.43803	72.0764	3.27654	4.68579	5e-05	0.00749083	yes
GSBRNA2T00084739001	BnaC04g48490D	GSBRNA2G00084739001	GSBRNA2G00084739001	chrC04:47080865-47081712	UP	PC10	OK	1.64471	16.0506	3.28672	3.34585	0.00025	0.0273993	yes
GSBRNA2T00033610001	BnaCnng37520D	GSBRNA2G00033610001	GSBRNA2G00033610001	chrCnn_random:36012144-36013668	UP	PC10	OK	2.04411	20.7451	3.34323	3.79203	5e-05	0.00749083	yes
GSBRNA2T00146043001	BnaC09g04500D	GSBRNA2G00146043001	GSBRNA2G00146043001	chrC09:2573612-2575815	UP	PC10	OK	2.18437	22.2798	3.35044	4.48836	5e-05	0.00749083	yes
GSBRNA2T00136918001	BnaC08g36500D	GSBRNA2G00136918001	GSBRNA2G00136918001	chrC08:33750555-33753773	UP	PC10	OK	5.73669	59.2207	3.36781	4.94378	5e-05	0.00749083	yes
GSBRNA2T00073646001	BnaC02g13820D	GSBRNA2G00073646001	GSBRNA2G00073646001	chrC02:9142507-9146099	UP	PC10	OK	3.16001	32.7716	3.37444	4.76925	5e-05	0.00749083	yes
GSBRNA2T00127193001	BnaC08g32950D	GSBRNA2G00127193001	GSBRNA2G00127193001	chrC08:31662579-31671855	UP	PC10	OK	0.285603	2.97358	3.38012	3.35646	0.00025	0.0273993	yes
GSBRNA2T00136137001	BnaA10g23880D	GSBRNA2G00136137001	GSBRNA2G00136137001	chrA10:15687854-15689806	UP	PC10	OK	10.8493	113.708	3.38966	4.95883	5e-05	0.00749083	yes
GSBRNA2T00043969001	BnaA02g35410D	GSBRNA2G00043969001	GSBRNA2G00043969001	chrA02_random:252434-255509	UP	PC10	OK	5.40943	57.6803	3.41453	5.00307	5e-05	0.00749083	yes
GSBRNA2T00076135001	BnaA05g32260D	GSBRNA2G00076135001	GSBRNA2G00076135001	chrA05:22116463-22119224	UP	PC10	OK	0.77962	8.32891	3.41728	3.52415	0.00025	0.0273993	yes
GSBRNA2T00090247001	BnaA04g12240D	GSBRNA2G00090247001	GSBRNA2G00090247001	chrA04:10419234-10422793	UP	PC10	OK	1.2858	13.7544	3.41915	4.38746	5e-05	0.00749083	yes
GSBRNA2T00136136001	BnaA10g23870D	GSBRNA2G00136136001	GSBRNA2G00136136001	chrA10:15683922-15685873	UP	PC10	OK	5.5257	61.2737	3.47104	4.15762	5e-05	0.00749083	yes
GSBRNA2T00135556001	BnaA10g18990D	GSBRNA2G00135556001	GSBRNA2G00135556001	chrA10:13639478-13641483	UP	PC10	OK	0.817572	9.15244	3.48474	3.43808	0.0001	0.0133125	yes
GSBRNA2T00009793001	BnaA09g02760D	GSBRNA2G00009793001	GSBRNA2G00009793001	chrA09:1408219-1411015	UP	PC10	OK	8.87432	101.141	3.51059	5.2687	5e-05	0.00749083	yes
GSBRNA2T00059448001	BnaA07g00870D	GSBRNA2G00059448001	GSBRNA2G00059448001	chrA07:614477-617853	UP	PC10	OK	7.86272	89.7158	3.51226	5.05093	5e-05	0.00749083	yes
GSBRNA2T00150895001	BnaA08g16720D	GSBRNA2G00150895001	GSBRNA2G00150895001	chrA08:13517878-13521291	UP	PC10	OK	1.76882	20.2507	3.51711	4.72489	5e-05	0.00749083	yes
GSBRNA2T00007279001	BnaC03g71790D	GSBRNA2G00007279001	GSBRNA2G00007279001	chrC03_random:334992-338193	UP	PC10	OK	2.40009	27.8495	3.5365	4.41558	5e-05	0.00749083	yes
GSBRNA2T00105529001	BnaA06g08900D	GSBRNA2G00105529001	GSBRNA2G00105529001	chrA06:4822726-4825769	UP	PC10	OK	3.73463	44.2703	3.5673	4.92961	5e-05	0.00749083	yes
GSBRNA2T00078344001	BnaA09g43940D	GSBRNA2G00078344001	GSBRNA2G00078344001	chrA09:30284900-30288190	UP	PC10	OK	2.75447	33.0078	3.58296	4.79793	5e-05	0.00749083	yes
GSBRNA2T00122669001	BnaC02g12730D	GSBRNA2G00122669001	GSBRNA2G00122669001	chrC02:8102753-8105962	UP	PC10	OK	4.15641	50.6267	3.60649	5.11295	5e-05	0.00749083	yes
GSBRNA2T00052820001	BnaA10g10880D	GSBRNA2G00052820001	GSBRNA2G00052820001	chrA10:9212153-9214941	UP	PC10	OK	2.04176	25.0438	3.61657	4.32879	5e-05	0.00749083	yes
GSBRNA2T00059872001	BnaC03g41470D	GSBRNA2G00059872001	GSBRNA2G00059872001	chrC03:26429525-26431892	UP	PC10	OK	1.2343	15.2916	3.63098	4.20797	5e-05	0.00749083	yes
GSBRNA2T00028989001	BnaC06g18580D	GSBRNA2G00028989001	GSBRNA2G00028989001	chrC06:20929704-20932437	UP	PC10	OK	1.42717	17.9818	3.65531	4.35548	5e-05	0.00749083	yes
GSBRNA2T00104151001	BnaC09g44650D	GSBRNA2G00104151001	GSBRNA2G00104151001	chrC09:45367915-45371109	UP	PC10	OK	1.3783	17.4725	3.66412	4.6307	5e-05	0.00749083	yes
GSBRNA2T00033738001	BnaC03g74760D	GSBRNA2G00033738001	GSBRNA2G00033738001	chrC03_random:2844106-2845609	UP	PC10	OK	1.66357	21.7404	3.70802	3.79944	0.00015	0.0183254	yes
GSBRNA2T00137360001	BnaA03g35630D	GSBRNA2G00137360001	GSBRNA2G00137360001	chrA03:17398863-17401047	UP	PC10	OK	1.27654	16.8132	3.71928	4.33544	5e-05	0.00749083	yes
GSBRNA2T00109882001	BnaA06g22030D	GSBRNA2G00109882001	GSBRNA2G00109882001	chrA06:15402997-15404567	UP	PC10	OK	1.58798	21.7147	3.77341	3.78108	5e-05	0.00749083	yes
GSBRNA2T00009608001	BnaA09g04970D	GSBRNA2G00009608001	GSBRNA2G00009608001	chrA09:2446828-2448987	UP	PC10	OK	1.11652	15.7954	3.82242	4.39748	5e-05	0.00749083	yes
GSBRNA2T00049471001	BnaA09g39720D	GSBRNA2G00049471001	GSBRNA2G00049471001	chrA09:28106988-28109066	UP	PC10	OK	5.6885	80.6215	3.82505	4.53903	5e-05	0.00749083	yes
GSBRNA2T00138676001	BnaA03g23580D	GSBRNA2G00138676001	GSBRNA2G00138676001	chrA03:11271408-11273915	UP	PC10	OK	0.989495	14.1347	3.8364	4.40715	5e-05	0.00749083	yes
GSBRNA2T00125323001	BnaC03g34580D	GSBRNA2G00125323001	GSBRNA2G00125323001	chrC03:20973434-20975192	UP	PC10	OK	0.81439	11.7667	3.85285	4.01082	0.00015	0.0183254	yes
GSBRNA2T00099011001	BnaA07g18550D	GSBRNA2G00099011001	GSBRNA2G00099011001	chrA07:15089970-15093068	UP	PC10	OK	0.765844	11.8067	3.94641	3.98781	5e-05	0.00749083	yes
GSBRNA2T00111281001	BnaA04g06350D	GSBRNA2G00111281001	GSBRNA2G00111281001	chrA04:4898527-4899830	UP	PC10	OK	2.58786	40.6073	3.97191	4.75308	5e-05	0.00749083	yes
GSBRNA2T00032039001	BnaC05g04600D	GSBRNA2G00032039001	GSBRNA2G00032039001	chrC05:2260658-2262854	UP	PC10	OK	1.82558	29.259	4.00245	4.55417	5e-05	0.00749083	yes
GSBRNA2T00123615001	BnaC03g37900D	GSBRNA2G00123615001	GSBRNA2G00123615001	chrC03:23187171-23189541	UP	PC10	OK	0.938952	15.3514	4.03118	4.13612	5e-05	0.00749083	yes
GSBRNA2T00098727001	BnaA07g16250D	GSBRNA2G00098727001	GSBRNA2G00098727001	chrA07:13817141-13818980	UP	PC10	OK	1.88865	31.4515	4.0577	4.02447	0.0001	0.0133125	yes
GSBRNA2T00020062001	BnaA06g40790D	GSBRNA2G00020062001	GSBRNA2G00020062001	chrA06_random:2182102-2184712	UP	PC10	OK	1.59996	26.7153	4.06156	5.06423	5e-05	0.00749083	yes
GSBRNA2T00096612001	BnaCnng19220D	GSBRNA2G00096612001	GSBRNA2G00096612001	chrCnn_random:17903979-17904866	UP	PC10	OK	15.5427	260.512	4.06704	5.79423	5e-05	0.00749083	yes
GSBRNA2T00009514001	BnaA09g04200D	GSBRNA2G00009514001	GSBRNA2G00009514001	chrA09:2085449-2085686	UP	PC10	OK	18.7467	318.515	4.08665	3.61917	0.0004	0.0402382	yes
GSBRNA2T00054617001	BnaCnng51570D	GSBRNA2G00054617001	GSBRNA2G00054617001	chrCnn_random:51032707-51035062	UP	PC10	OK	0.821676	14.2475	4.11599	4.10657	5e-05	0.00749083	yes
GSBRNA2T00137700001	BnaA03g32800D	GSBRNA2G00137700001	GSBRNA2G00137700001	chrA03:15835061-15837447	UP	PC10	OK	0.935932	16.4332	4.13407	4.20274	5e-05	0.00749083	yes
GSBRNA2T00111879001	BnaA03g29240D	GSBRNA2G00111879001	GSBRNA2G00111879001	chrA03:14224591-14225789	UP	PC10	OK	1.27992	22.4932	4.13536	3.44048	0.00025	0.0273993	yes
GSBRNA2T00018422001	BnaA09g00750D	GSBRNA2G00018422001	GSBRNA2G00018422001	chrA09:476937-477869	UP	PC10	OK	11.6475	204.844	4.13644	5.76799	5e-05	0.00749083	yes
GSBRNA2T00079842001	BnaAnng28400D	GSBRNA2G00079842001	GSBRNA2G00079842001	chrAnn_random:32449232-32452545	UP	PC10	OK	0.385027	7.05498	4.19561	3.82165	0.0002	0.023	yes
GSBRNA2T00138420001	BnaA01g19850D	GSBRNA2G00138420001	GSBRNA2G00138420001	chrA01:11464957-11467265	UP	PC10	OK	1.1136	20.4829	4.20112	4.43477	5e-05	0.00749083	yes
GSBRNA2T00156919001	BnaC07g36670D	GSBRNA2G00156919001	GSBRNA2G00156919001	chrC07:38642450-38646115	UP	PC10	OK	3.54015	68.1526	4.26688	5.92606	5e-05	0.00749083	yes
GSBRNA2T00108140001	BnaC04g33890D	GSBRNA2G00108140001	GSBRNA2G00108140001	chrC04:35390685-35392686	UP	PC10	OK	1.12598	22.2285	4.30315	4.19723	5e-05	0.00749083	yes
GSBRNA2T00059181001	BnaC03g58640D	GSBRNA2G00059181001	GSBRNA2G00059181001	chrC03:47923963-47924499	UP	PC10	OK	2.96025	58.9205	4.31498	3.68157	0.00045	0.0441794	yes
GSBRNA2T00113661001	BnaA03g39260D	GSBRNA2G00113661001	GSBRNA2G00113661001	chrA03:19570110-19575083	UP	PC10	OK	0.433783	8.6965	4.32539	4.26588	0.0005	0.048505	yes
GSBRNA2T00133749001	BnaC07g28310D	GSBRNA2G00133749001	GSBRNA2G00133749001	chrC07:33479806-33482229	UP	PC10	OK	0.427244	8.62287	4.33504	3.97826	0.00035	0.0358713	yes
GSBRNA2T00107093001	BnaC09g48600D	GSBRNA2G00107093001	GSBRNA2G00107093001	chrC09:47328694-47330684	UP	PC10	OK	3.40692	69.8499	4.35772	5.00879	5e-05	0.00749083	yes
GSBRNA2T00006023001	BnaAnng03120D	GSBRNA2G00006023001	GSBRNA2G00006023001	chrAnn_random:2481793-2483609	UP	PC10	OK	0.695465	14.3706	4.369	4.30587	5e-05	0.00749083	yes
GSBRNA2T00041446001	BnaA02g09870D	GSBRNA2G00041446001	GSBRNA2G00041446001	chrA02:4950702-4954201	UP	PC10	OK	0.850526	18.122	4.41324	4.61776	5e-05	0.00749083	yes
GSBRNA2T00157538001	BnaC01g17820D	GSBRNA2G00157538001	GSBRNA2G00157538001	chrC01:12247230-12251456	UP	PC10	OK	1.15442	24.7402	4.42161	4.19476	0.0003	0.0315386	yes
GSBRNA2T00000167001	BnaA05g26490D	GSBRNA2G00000167001	GSBRNA2G00000167001	chrA05:19394218-19396152	UP	PC10	OK	1.03542	22.375	4.4336	4.04738	0.0002	0.023	yes
GSBRNA2T00012629001	BnaC04g05270D	GSBRNA2G00012629001	GSBRNA2G00012629001	chrC04:3733319-3736868	UP	PC10	OK	2.17016	47.1735	4.4421	5.49251	5e-05	0.00749083	yes
GSBRNA2T00087972001	BnaA10g03960D	GSBRNA2G00087972001	GSBRNA2G00087972001	chrA10:2101911-2106870	UP	PC10	OK	0.63284	13.7822	4.44482	4.6348	5e-05	0.00749083	yes
GSBRNA2T00031979001	BnaC05g04080D	GSBRNA2G00031979001	GSBRNA2G00031979001	chrC05:1988936-1993604	UP	PC10	OK	0.486207	10.6362	4.45126	4.59204	5e-05	0.00749083	yes
GSBRNA2T00051169001	BnaA08g30830D	GSBRNA2G00051169001	GSBRNA2G00051169001	chrA08_random:1721573-1722322	UP	PC10	OK	4.05457	89.6559	4.46678	5.25108	5e-05	0.00749083	yes
GSBRNA2T00141693001	BnaC03g50220D	GSBRNA2G00141693001	GSBRNA2G00141693001	chrC03:34901995-34905678	UP	PC10	OK	0.250099	5.57395	4.47813	4.09522	0.00015	0.0183254	yes
GSBRNA2T00077003001	BnaA04g20340D	GSBRNA2G00077003001	GSBRNA2G00077003001	chrA04:15697498-15699770	UP	PC10	OK	4.26512	95.7757	4.489	5.62805	5e-05	0.00749083	yes
GSBRNA2T00130886001	BnaC01g03500D	GSBRNA2G00130886001	GSBRNA2G00130886001	chrC01:1811440-1815719	UP	PC10	OK	2.23069	51.2877	4.52305	5.8621	5e-05	0.00749083	yes
GSBRNA2T00113709001	BnaA03g38910D	GSBRNA2G00113709001	GSBRNA2G00113709001	chrA03:19347039-19349443	UP	PC10	OK	0.649016	15.4863	4.57659	4.08609	0.0002	0.023	yes
GSBRNA2T00019139001	BnaC03g23540D	GSBRNA2G00019139001	GSBRNA2G00019139001	chrC03:13126441-13127773	UP	PC10	OK	1.1696	28.5891	4.61138	4.01238	0.0003	0.0315386	yes
GSBRNA2T00149616001	BnaA01g15090D	GSBRNA2G00149616001	GSBRNA2G00149616001	chrA01:7692787-7696164	UP	PC10	OK	1.27084	31.223	4.61876	4.37673	0.00015	0.0183254	yes
GSBRNA2T00009517001	BnaA09g04230D	GSBRNA2G00009517001	GSBRNA2G00009517001	chrA09:2092283-2092529	UP	PC10	OK	64.4592	1597.1	4.63093	9.39727	5e-05	0.00749083	yes
GSBRNA2T00072265001	BnaA02g27790D	GSBRNA2G00072265001	GSBRNA2G00072265001	chrA02:20529416-20530169	UP	PC10	OK	1.64304	41.0647	4.64346	3.75868	0.00035	0.0358713	yes
GSBRNA2T00023807001	BnaC05g39980D	GSBRNA2G00023807001	GSBRNA2G00023807001	chrC05:38312815-38315047	UP	PC10	OK	2.61911	67.0971	4.6791	5.75076	5e-05	0.00749083	yes
GSBRNA2T00077001001	BnaA04g20360D	GSBRNA2G00077001001	GSBRNA2G00077001001	chrA04:15705732-15707918	UP	PC10	OK	3.10793	79.63	4.67929	5.4515	5e-05	0.00749083	yes
GSBRNA2T00145932001	BnaC09g03610D	GSBRNA2G00145932001	GSBRNA2G00145932001	chrC09:2060734-2060962	UP	PC10	OK	44.4038	1150.2	4.69506	5.14052	5e-05	0.00749083	yes
GSBRNA2T00150081001	BnaC03g45950D	GSBRNA2G00150081001	GSBRNA2G00150081001	chrC03:30969615-30972158	UP	PC10	OK	0.603526	15.8447	4.71444	4.15037	0.0004	0.0402382	yes
GSBRNA2T00147846001	BnaC06g37750D	GSBRNA2G00147846001	GSBRNA2G00147846001	chrC06:35644119-35644878	UP	PC10	OK	2.88993	76.246	4.72156	4.69585	5e-05	0.00749083	yes
GSBRNA2T00062035001	BnaC05g10210D	GSBRNA2G00062035001	GSBRNA2G00062035001	chrC05:5736645-5739548	UP	PC10	OK	0.965679	25.9155	4.74613	4.9287	5e-05	0.00749083	yes
GSBRNA2T00101037001	BnaC04g28060D	GSBRNA2G00101037001	GSBRNA2G00101037001	chrC04:29471180-29473081	UP	PC10	OK	3.20302	86.3972	4.75348	5.60014	5e-05	0.00749083	yes
GSBRNA2T00061117001	BnaC03g60420D	GSBRNA2G00061117001	GSBRNA2G00061117001	chrC03:49575467-49578085	UP	PC10	OK	0.586252	15.992	4.76968	4.67699	0.00015	0.0183254	yes
GSBRNA2T00085697001	BnaC04g42320D	GSBRNA2G00085697001	GSBRNA2G00085697001	chrC04:42891175-42894233	UP	PC10	OK	0.78742	21.5968	4.77754	5.10039	5e-05	0.00749083	yes
GSBRNA2T00079392001	BnaA05g25900D	GSBRNA2G00079392001	GSBRNA2G00079392001	chrA05:19072075-19074317	UP	PC10	OK	3.06784	84.7151	4.78732	5.96874	5e-05	0.00749083	yes
GSBRNA2T00035758001	BnaC09g09390D	GSBRNA2G00035758001	GSBRNA2G00035758001	chrC09:6095044-6097337	UP	PC10	OK	1.14234	31.7475	4.79658	5.0225	5e-05	0.00749083	yes
GSBRNA2T00008834001	BnaC05g08260D	GSBRNA2G00008834001	GSBRNA2G00008834001	chrC05:4337958-4338465	UP	PC10	OK	2.75565	77.5909	4.81542	4.15384	0.00015	0.0183254	yes
GSBRNA2T00100311001	BnaC07g47390D	GSBRNA2G00100311001	GSBRNA2G00100311001	chrC07:44623201-44625811	UP	PC10	OK	0.860488	24.4516	4.82863	5.4145	5e-05	0.00749083	yes
GSBRNA2T00059183001	BnaC03g58660D	GSBRNA2G00059183001	GSBRNA2G00059183001	chrC03:47939396-47941032	UP	PC10	OK	0.752102	21.5616	4.84139	4.06839	0.0001	0.0133125	yes
GSBRNA2T00142849001	BnaC07g25300D	GSBRNA2G00142849001	GSBRNA2G00142849001	chrC07:31457934-31459374	UP	PC10	OK	6.39733	185.765	4.85986	6.38973	5e-05	0.00749083	yes
GSBRNA2T00072978001	BnaCnng10290D	GSBRNA2G00072978001	GSBRNA2G00072978001	chrCnn_random:9360808-9362430	UP	PC10	OK	2.65841	77.3228	4.86226	5.1619	5e-05	0.00749083	yes
GSBRNA2T00002764001	BnaC05g02570D	GSBRNA2G00002764001	GSBRNA2G00002764001	chrC05:1250504-1254969	UP	PC10	OK	0.305068	8.89166	4.86525	4.28783	0.0003	0.0315386	yes
GSBRNA2T00042034001	BnaC09g15570D	GSBRNA2G00042034001	GSBRNA2G00042034001	chrC09:12390261-12391530	UP	PC10	OK	0.812565	23.7405	4.86872	4.40459	0.0003	0.0315386	yes
GSBRNA2T00144556001	BnaA06g31320D	GSBRNA2G00144556001	GSBRNA2G00144556001	chrA06:21077203-21079483	UP	PC10	OK	4.7518	140.613	4.88711	6.43572	5e-05	0.00749083	yes
GSBRNA2T00045045001	BnaA09g09160D	GSBRNA2G00045045001	GSBRNA2G00045045001	chrA09:4567441-4569663	UP	PC10	OK	0.904905	26.8944	4.8934	4.41124	0.0003	0.0315386	yes
GSBRNA2T00021776001	BnaA04g05320D	GSBRNA2G00021776001	GSBRNA2G00021776001	chrA04:4106721-4109488	UP	PC10	OK	1.79798	53.6247	4.89845	5.72817	5e-05	0.00749083	yes
GSBRNA2T00044281001	BnaA03g48660D	GSBRNA2G00044281001	GSBRNA2G00044281001	chrA03:24953213-24953825	UP	PC10	OK	3.83789	114.763	4.9022	4.42278	0.00025	0.0273993	yes
GSBRNA2T00154297001	BnaA10g15570D	GSBRNA2G00154297001	GSBRNA2G00154297001	chrA10:12053350-12055831	UP	PC10	OK	7.96476	238.339	4.90324	5.58205	5e-05	0.00749083	yes
GSBRNA2T00093833001	BnaCnng18160D	GSBRNA2G00093833001	GSBRNA2G00093833001	chrCnn_random:16936989-16938582	UP	PC10	OK	2.66176	79.8065	4.90606	6.03792	5e-05	0.00749083	yes
GSBRNA2T00125192001	BnaC03g35490D	GSBRNA2G00125192001	GSBRNA2G00125192001	chrC03:21548269-21549696	UP	PC10	OK	7.65567	233.795	4.93257	6.4599	5e-05	0.00749083	yes
GSBRNA2T00146548001	BnaA07g33190D	GSBRNA2G00146548001	GSBRNA2G00146548001	chrA07:22830688-22831453	UP	PC10	OK	2.24745	69.7024	4.95485	4.43952	0.0004	0.0402382	yes
GSBRNA2T00017053001	BnaA01g36400D	GSBRNA2G00017053001	GSBRNA2G00017053001	chrA01_random:1960991-1965651	UP	PC10	OK	0.607789	18.8564	4.95534	5.25679	5e-05	0.00749083	yes
GSBRNA2T00099032001	BnaA07g18750D	GSBRNA2G00099032001	GSBRNA2G00099032001	chrA07:15212495-15213819	UP	PC10	OK	2.64081	82.0399	4.95727	5.26303	5e-05	0.00749083	yes
GSBRNA2T00131351001	BnaA01g09410D	GSBRNA2G00131351001	GSBRNA2G00131351001	chrA01:4607771-4608290	UP	PC10	OK	4.95521	154.039	4.95821	5.17151	5e-05	0.00749083	yes
GSBRNA2T00009850001	BnaA09g02340D	GSBRNA2G00009850001	GSBRNA2G00009850001	chrA09:1191116-1191977	UP	PC10	OK	3.91896	123.303	4.97559	5.11378	5e-05	0.00749083	yes
GSBRNA2T00091687001	BnaC04g02280D	GSBRNA2G00091687001	GSBRNA2G00091687001	chrC04:1749059-1749306	UP	PC10	OK	23.8162	754.012	4.98457	4.3145	0.0001	0.0133125	yes
GSBRNA2T00049666001	BnaC06g31750D	GSBRNA2G00049666001	GSBRNA2G00049666001	chrC06:32205319-32205690	UP	PC10	OK	18.4811	585.262	4.98496	5.26744	5e-05	0.00749083	yes
GSBRNA2T00071611001	BnaC03g34350D	GSBRNA2G00071611001	GSBRNA2G00071611001	chrC03:20837015-20839335	UP	PC10	OK	4.27334	135.559	4.98741	6.35969	5e-05	0.00749083	yes
GSBRNA2T00112105001	BnaA03g27350D	GSBRNA2G00112105001	GSBRNA2G00112105001	chrA03:13488872-13489461	UP	PC10	OK	9.22399	292.651	4.98765	4.94754	5e-05	0.00749083	yes
GSBRNA2T00138807001	BnaA03g22500D	GSBRNA2G00138807001	GSBRNA2G00138807001	chrA03:10681807-10684654	UP	PC10	OK	0.972853	30.8778	4.9882	4.17615	0.0003	0.0315386	yes
GSBRNA2T00115206001	BnaC04g25500D	GSBRNA2G00115206001	GSBRNA2G00115206001	chrC04:26635738-26638091	UP	PC10	OK	3.8918	127.368	5.03242	6.37886	5e-05	0.00749083	yes
GSBRNA2T00007840001	BnaCnng23280D	GSBRNA2G00007840001	GSBRNA2G00007840001	chrCnn_random:21839172-21839727	UP	PC10	OK	2.23988	73.5451	5.03714	3.98699	0.00025	0.0273993	yes
GSBRNA2T00086320001	BnaC01g27710D	GSBRNA2G00086320001	GSBRNA2G00086320001	chrC01:25347034-25348589	UP	PC10	OK	1.37473	45.2614	5.04106	5.52639	5e-05	0.00749083	yes
GSBRNA2T00111771001	BnaA03g30180D	GSBRNA2G00111771001	GSBRNA2G00111771001	chrA03:14640282-14642602	UP	PC10	OK	2.28662	75.6492	5.04804	6.12849	5e-05	0.00749083	yes
GSBRNA2T00150685001	BnaA08g18330D	GSBRNA2G00150685001	GSBRNA2G00150685001	chrA08:14366607-14368376	UP	PC10	OK	10.9286	361.602	5.04822	6.10361	5e-05	0.00749083	yes
GSBRNA2T00149415001	BnaA01g16670D	GSBRNA2G00149415001	GSBRNA2G00149415001	chrA01:8692976-8694694	UP	PC10	OK	0.87822	29.2037	5.05542	5.13941	5e-05	0.00749083	yes
GSBRNA2T00056333001	BnaA01g14010D	GSBRNA2G00056333001	GSBRNA2G00056333001	chrA01:7116843-7118074	UP	PC10	OK	15.5503	518.735	5.05998	5.77333	5e-05	0.00749083	yes
GSBRNA2T00048242001	BnaCnng48740D	GSBRNA2G00048242001	GSBRNA2G00048242001	chrCnn_random:48120787-48122618	UP	PC10	OK	5.59631	187.212	5.06406	6.68523	5e-05	0.00749083	yes
GSBRNA2T00032154001	BnaC05g29750D	GSBRNA2G00032154001	GSBRNA2G00032154001	chrC05:28658311-28661206	UP	PC10	OK	0.958304	32.0961	5.06577	5.34126	5e-05	0.00749083	yes
GSBRNA2T00116083001	BnaC01g16500D	GSBRNA2G00116083001	GSBRNA2G00116083001	chrC01:11313530-11314792	UP	PC10	OK	11.503	387.197	5.07299	5.89365	5e-05	0.00749083	yes
GSBRNA2T00154309001	BnaA10g15660D	GSBRNA2G00154309001	GSBRNA2G00154309001	chrA10:12088301-12089723	UP	PC10	OK	1.05764	35.6737	5.07593	4.35357	0.0004	0.0402382	yes
GSBRNA2T00061111001	BnaC03g60370D	GSBRNA2G00061111001	GSBRNA2G00061111001	chrC03:49558760-49561334	UP	PC10	OK	0.648879	21.8876	5.07602	5.15614	5e-05	0.00749083	yes
GSBRNA2T00064167001	BnaA05g34110D	GSBRNA2G00064167001	GSBRNA2G00064167001	chrA05:23031774-23037597	UP	PC10	OK	0.383169	13.0392	5.08873	4.73543	0.0003	0.0315386	yes
GSBRNA2T00092678001	BnaA03g50770D	GSBRNA2G00092678001	GSBRNA2G00092678001	chrA03:26372941-26375158	UP	PC10	OK	0.770063	26.2339	5.09031	5.03014	0.0001	0.0133125	yes
GSBRNA2T00089606001	BnaA08g27230D	GSBRNA2G00089606001	GSBRNA2G00089606001	chrA08:18216369-18218234	UP	PC10	OK	11.2162	382.902	5.09331	5.86754	5e-05	0.00749083	yes
GSBRNA2T00011949001	BnaCnng71770D	GSBRNA2G00011949001	GSBRNA2G00011949001	chrCnn_random:72040788-72042162	UP	PC10	OK	3.22294	110.921	5.10501	5.62339	5e-05	0.00749083	yes
GSBRNA2T00096788001	BnaA03g56990D	GSBRNA2G00096788001	GSBRNA2G00096788001	chrA03_random:950826-952038	UP	PC10	OK	0.817673	28.1869	5.10736	4.59	0.00015	0.0183254	yes
GSBRNA2T00124091001	BnaC04g19100D	GSBRNA2G00124091001	GSBRNA2G00124091001	chrC04:19276819-19278348	UP	PC10	OK	0.9092	31.5977	5.11908	4.46386	0.0002	0.023	yes
GSBRNA2T00135745001	BnaA10g20620D	GSBRNA2G00135745001	GSBRNA2G00135745001	chrA10:14361103-14364245	UP	PC10	OK	1.00852	35.3786	5.13257	5.84431	5e-05	0.00749083	yes
GSBRNA2T00150900001	BnaA08g16670D	GSBRNA2G00150900001	GSBRNA2G00150900001	chrA08:13501183-13504036	UP	PC10	OK	0.423579	14.8593	5.13259	4.78901	0.00015	0.0183254	yes
GSBRNA2T00073359001	BnaC02g34750D	GSBRNA2G00073359001	GSBRNA2G00073359001	chrC02:37391216-37393552	UP	PC10	OK	1.20998	42.5894	5.13743	5.43034	5e-05	0.00749083	yes
GSBRNA2T00154052001	BnaA05g20840D	GSBRNA2G00154052001	GSBRNA2G00154052001	chrA05:16175496-16177949	UP	PC10	OK	0.54534	19.2068	5.13832	4.25379	0.00025	0.0273993	yes
GSBRNA2T00061514001	BnaA06g19910D	GSBRNA2G00061514001	GSBRNA2G00061514001	chrA06:12609413-12612427	UP	PC10	OK	0.498975	17.7072	5.14922	4.34746	0.0002	0.023	yes
GSBRNA2T00085465001	BnaC05g01430D	GSBRNA2G00085465001	GSBRNA2G00085465001	chrC05:746688-748532	UP	PC10	OK	6.13758	217.932	5.15006	6.49495	5e-05	0.00749083	yes
GSBRNA2T00109746001	BnaA06g21100D	GSBRNA2G00109746001	GSBRNA2G00109746001	chrA06:14654726-14655146	UP	PC10	OK	3.87139	137.572	5.1512	4.73737	0.00015	0.0183254	yes
GSBRNA2T00048429001	BnaA05g16950D	GSBRNA2G00048429001	GSBRNA2G00048429001	chrA05:11738028-11740890	UP	PC10	OK	0.876085	31.1507	5.15205	5.00196	0.00015	0.0183254	yes
GSBRNA2T00015444001	BnaC03g54030D	GSBRNA2G00015444001	GSBRNA2G00015444001	chrC03:40739586-40742471	UP	PC10	OK	0.450266	16.0259	5.15348	4.39803	0.0001	0.0133125	yes
GSBRNA2T00026681001	BnaCnng04950D	GSBRNA2G00026681001	GSBRNA2G00026681001	chrCnn_random:4526491-4526845	UP	PC10	OK	5.39356	192.651	5.15861	4.2033	5e-05	0.00749083	yes
GSBRNA2T00101250001	BnaC01g33660D	GSBRNA2G00101250001	GSBRNA2G00101250001	chrC01:32860482-32863240	UP	PC10	OK	0.492552	17.6171	5.16056	4.12695	5e-05	0.00749083	yes
GSBRNA2T00144446001	BnaA06g30420D	GSBRNA2G00144446001	GSBRNA2G00144446001	chrA06:20549606-20551397	UP	PC10	OK	9.99038	357.78	5.16239	6.22241	5e-05	0.00749083	yes
GSBRNA2T00058379001	BnaA03g19650D	GSBRNA2G00058379001	GSBRNA2G00058379001	chrA03:9316135-9316572	UP	PC10	OK	17.9495	647.598	5.17308	6.15091	5e-05	0.00749083	yes
GSBRNA2T00064118001	BnaA05g33680D	GSBRNA2G00064118001	GSBRNA2G00064118001	chrA05:22736815-22737232	UP	PC10	OK	13.0252	470.383	5.17446	5.46996	5e-05	0.00749083	yes
GSBRNA2T00025406001	BnaC09g38100D	GSBRNA2G00025406001	GSBRNA2G00025406001	chrC09:41110266-41112599	UP	PC10	OK	7.00595	253.852	5.17926	5.94335	5e-05	0.00749083	yes
GSBRNA2T00081068001	BnaA02g04170D	GSBRNA2G00081068001	GSBRNA2G00081068001	chrA02:1865798-1868113	UP	PC10	OK	1.04817	38.0972	5.18374	5.90277	5e-05	0.00749083	yes
GSBRNA2T00104170001	BnaC09g44510D	GSBRNA2G00104170001	GSBRNA2G00104170001	chrC09:45288733-45291079	UP	PC10	OK	0.370137	13.4812	5.18674	4.62761	0.0001	0.0133125	yes
GSBRNA2T00095567001	BnaC09g21050D	GSBRNA2G00095567001	GSBRNA2G00095567001	chrC09:18347822-18349647	UP	PC10	OK	0.733656	26.879	5.19523	4.73432	5e-05	0.00749083	yes
GSBRNA2T00054757001	BnaA06g35670D	GSBRNA2G00054757001	GSBRNA2G00054757001	chrA06:23426776-23427769	UP	PC10	OK	1.56097	57.3121	5.19832	4.63107	0.00025	0.0273993	yes
GSBRNA2T00052781001	BnaA02g07920D	GSBRNA2G00052781001	GSBRNA2G00052781001	chrA02:3750092-3753377	UP	PC10	OK	1.62874	60.3969	5.21264	6.30167	5e-05	0.00749083	yes
GSBRNA2T00014247001	BnaC07g49180D	GSBRNA2G00014247001	GSBRNA2G00014247001	chrC07_random:1794300-1796090	UP	PC10	OK	5.23716	194.541	5.21514	6.35843	5e-05	0.00749083	yes
GSBRNA2T00008436001	BnaC03g73850D	GSBRNA2G00008436001	GSBRNA2G00008436001	chrC03_random:1882002-1885293	UP	PC10	OK	0.393152	14.6106	5.21579	4.64301	0.0001	0.0133125	yes
GSBRNA2T00007569001	BnaC09g51360D	GSBRNA2G00007569001	GSBRNA2G00007569001	chrC09_random:502162-506944	UP	PC10	OK	3.94418	146.925	5.21922	5.32087	5e-05	0.00749083	yes
GSBRNA2T00059979001	BnaA08g19130D	GSBRNA2G00059979001	GSBRNA2G00059979001	chrA08:14752756-14753110	UP	PC10	OK	4.03681	150.583	5.2212	4.01367	0.0002	0.023	yes
GSBRNA2T00100059001	BnaC07g45470D	GSBRNA2G00100059001	GSBRNA2G00100059001	chrC07:43528788-43530787	UP	PC10	OK	0.555217	20.7483	5.2238	4.39188	5e-05	0.00749083	yes
GSBRNA2T00098523001	BnaA07g14690D	GSBRNA2G00098523001	GSBRNA2G00098523001	chrA07:12900228-12907775	UP	PC10	OK	0.212512	7.94334	5.22413	4.53214	0.0002	0.023	yes
GSBRNA2T00071362001	BnaC06g14040D	GSBRNA2G00071362001	GSBRNA2G00071362001	chrC06:16889001-16890615	UP	PC10	OK	3.67117	137.392	5.22591	6.43356	5e-05	0.00749083	yes
GSBRNA2T00121761001	BnaC08g21170D	GSBRNA2G00121761001	GSBRNA2G00121761001	chrC08:23753409-23754167	UP	PC10	OK	12.9408	484.761	5.22728	6.48976	5e-05	0.00749083	yes
GSBRNA2T00150525001	BnaA10g00580D	GSBRNA2G00150525001	GSBRNA2G00150525001	chrA10:293367-294087	UP	PC10	OK	1.4727	55.3727	5.23264	4.54951	0.0001	0.0133125	yes
GSBRNA2T00151985001	BnaC02g04170D	GSBRNA2G00151985001	GSBRNA2G00151985001	chrC02:2121743-2125617	UP	PC10	OK	0.625957	23.6297	5.23839	5.57543	5e-05	0.00749083	yes
GSBRNA2T00128143001	BnaC08g03920D	GSBRNA2G00128143001	GSBRNA2G00128143001	chrC08:4093752-4094286	UP	PC10	OK	4.90956	185.367	5.23864	5.507	5e-05	0.00749083	yes
GSBRNA2T00098662001	BnaA07g15740D	GSBRNA2G00098662001	GSBRNA2G00098662001	chrA07:13520757-13522371	UP	PC10	OK	2.30258	86.9533	5.23892	6.29541	5e-05	0.00749083	yes
GSBRNA2T00086218001	BnaCnng14580D	GSBRNA2G00086218001	GSBRNA2G00086218001	chrCnn_random:13512548-13513348	UP	PC10	OK	4.05998	154.16	5.24682	5.67074	5e-05	0.00749083	yes
GSBRNA2T00045562001	BnaCnng46510D	GSBRNA2G00045562001	GSBRNA2G00045562001	chrCnn_random:45837549-45840230	UP	PC10	OK	0.53299	20.3511	5.25485	4.68243	0.00015	0.0183254	yes
GSBRNA2T00022521001	BnaCnng75130D	GSBRNA2G00022521001	GSBRNA2G00022521001	chrCnn_random:76107204-76108909	UP	PC10	OK	3.45587	132.841	5.2645	6.08085	5e-05	0.00749083	yes
GSBRNA2T00074030001	BnaC04g00950D	GSBRNA2G00074030001	GSBRNA2G00074030001	chrC04:778955-780317	UP	PC10	OK	1.0476	40.2793	5.26488	4.50185	0.0003	0.0315386	yes
GSBRNA2T00070219001	BnaA02g13590D	GSBRNA2G00070219001	GSBRNA2G00070219001	chrA02:7458165-7459260	UP	PC10	OK	0.826774	31.8316	5.26682	4.47112	0.00015	0.0183254	yes
GSBRNA2T00132757001	BnaA05g02520D	GSBRNA2G00132757001	GSBRNA2G00132757001	chrA05:1384992-1386814	UP	PC10	OK	1.57559	60.8717	5.27181	4.6591	0.00025	0.0273993	yes
GSBRNA2T00019044001	BnaC03g22940D	GSBRNA2G00019044001	GSBRNA2G00019044001	chrC03:12717997-12719997	UP	PC10	OK	0.475341	18.4459	5.2782	4.49024	0.0001	0.0133125	yes
GSBRNA2T00003959001	BnaC05g50860D	GSBRNA2G00003959001	GSBRNA2G00003959001	chrC05_random:1684787-1687953	UP	PC10	OK	0.463403	18.0855	5.28642	4.84649	5e-05	0.00749083	yes
GSBRNA2T00135080001	BnaC02g17750D	GSBRNA2G00135080001	GSBRNA2G00135080001	chrC02:13362886-13364063	UP	PC10	OK	0.928416	36.3347	5.29043	4.4666	0.00015	0.0183254	yes
GSBRNA2T00068766001	BnaA09g14940D	GSBRNA2G00068766001	GSBRNA2G00068766001	chrA09:8657963-8659223	UP	PC10	OK	0.9482	37.2074	5.29426	5.04072	0.00015	0.0183254	yes
GSBRNA2T00003714001	BnaA03g58450D	GSBRNA2G00003714001	GSBRNA2G00003714001	chrA03_random:1686387-1689592	UP	PC10	OK	3.57896	140.684	5.29677	6.71343	5e-05	0.00749083	yes
GSBRNA2T00038181001	BnaC04g51500D	GSBRNA2G00038181001	GSBRNA2G00038181001	chrC04:48806540-48807479	UP	PC10	OK	5.43296	214.531	5.3033	6.23806	5e-05	0.00749083	yes
GSBRNA2T00091017001	BnaA08g03150D	GSBRNA2G00091017001	GSBRNA2G00091017001	chrA08:2569547-2571009	UP	PC10	OK	1.50894	59.6545	5.30502	4.5247	5e-05	0.00749083	yes
GSBRNA2T00015842001	BnaC03g27530D	GSBRNA2G00015842001	GSBRNA2G00015842001	chrC03:16008363-16009604	UP	PC10	OK	0.564205	22.3751	5.30953	4.49437	0.0003	0.0315386	yes
GSBRNA2T00012909001	BnaA02g08480D	GSBRNA2G00012909001	GSBRNA2G00012909001	chrA02:4133018-4137651	UP	PC10	OK	2.0129	80.5915	5.32328	6.62066	5e-05	0.00749083	yes
GSBRNA2T00024068001	BnaC04g43840D	GSBRNA2G00024068001	GSBRNA2G00024068001	chrC04:44098354-44102576	UP	PC10	OK	0.328688	13.1613	5.32344	4.70523	5e-05	0.00749083	yes
GSBRNA2T00081382001	BnaA02g04760D	GSBRNA2G00081382001	GSBRNA2G00081382001	chrA02:2113033-2114146	UP	PC10	OK	3.43743	137.681	5.32385	5.51519	5e-05	0.00749083	yes
GSBRNA2T00016586001	BnaC02g44910D	GSBRNA2G00016586001	GSBRNA2G00016586001	chrC02_random:703214-707021	UP	PC10	OK	0.473739	19.1051	5.33372	5.00129	0.0002	0.023	yes
GSBRNA2T00016475001	BnaAnng13710D	GSBRNA2G00016475001	GSBRNA2G00016475001	chrAnn_random:14645653-14647511	UP	PC10	OK	3.75414	151.824	5.33778	6.51458	5e-05	0.00749083	yes
GSBRNA2T00037942001	BnaCnng41410D	GSBRNA2G00037942001	GSBRNA2G00037942001	chrCnn_random:40227123-40227543	UP	PC10	OK	5.57937	225.985	5.33998	4.89928	5e-05	0.00749083	yes
GSBRNA2T00065186001	BnaAnng24780D	GSBRNA2G00065186001	GSBRNA2G00065186001	chrAnn_random:28652830-28655114	UP	PC10	OK	1.91326	77.54	5.34083	6.29016	5e-05	0.00749083	yes
GSBRNA2T00112086001	BnaA03g27540D	GSBRNA2G00112086001	GSBRNA2G00112086001	chrA03:13552850-13555231	UP	PC10	OK	2.87716	116.609	5.34089	6.38671	5e-05	0.00749083	yes
GSBRNA2T00071612001	BnaC03g34360D	GSBRNA2G00071612001	GSBRNA2G00071612001	chrC03:20839388-20840047	UP	PC10	OK	2.40704	97.7765	5.34416	4.9266	0.0002	0.023	yes
GSBRNA2T00071549001	BnaC03g33860D	GSBRNA2G00071549001	GSBRNA2G00071549001	chrC03:20600155-20601719	UP	PC10	OK	1.79078	72.7566	5.34442	5.51225	5e-05	0.00749083	yes
GSBRNA2T00009508001	BnaA09g04150D	GSBRNA2G00009508001	GSBRNA2G00009508001	chrA09:2070698-2071427	UP	PC10	OK	2.50996	102.242	5.34818	4.81994	5e-05	0.00749083	yes
GSBRNA2T00085370001	BnaC05g00650D	GSBRNA2G00085370001	GSBRNA2G00085370001	chrC05:348189-348909	UP	PC10	OK	1.79535	73.2407	5.35031	4.6876	0.00015	0.0183254	yes
GSBRNA2T00137699001	BnaA03g32810D	GSBRNA2G00137699001	GSBRNA2G00137699001	chrA03:15839251-15842058	UP	PC10	OK	5.75077	234.907	5.35219	6.37611	5e-05	0.00749083	yes
GSBRNA2T00153589001	BnaC03g32550D	GSBRNA2G00153589001	GSBRNA2G00153589001	chrC03:19975600-19978003	UP	PC10	OK	3.6125	147.82	5.3547	6.77601	5e-05	0.00749083	yes
GSBRNA2T00078951001	BnaA10g07190D	GSBRNA2G00078951001	GSBRNA2G00078951001	chrA10:5649901-5650722	UP	PC10	OK	1.94434	79.8362	5.35969	4.97743	0.0001	0.0133125	yes
GSBRNA2T00005576001	BnaA01g26480D	GSBRNA2G00005576001	GSBRNA2G00005576001	chrA01:18549643-18553027	UP	PC10	OK	0.809154	33.2552	5.36102	5.72245	5e-05	0.00749083	yes
GSBRNA2T00101294001	BnaC01g33860D	GSBRNA2G00101294001	GSBRNA2G00101294001	chrC01:33064622-33067890	UP	PC10	OK	1.60285	66.7285	5.37959	6.30832	5e-05	0.00749083	yes
GSBRNA2T00017356001	BnaCnng29100D	GSBRNA2G00017356001	GSBRNA2G00017356001	chrCnn_random:27570085-27572816	UP	PC10	OK	0.343185	14.2873	5.3796	4.69594	0.0002	0.023	yes
GSBRNA2T00125437001	BnaA06g15820D	GSBRNA2G00125437001	GSBRNA2G00125437001	chrA06:8684158-8684921	UP	PC10	OK	11.2135	467.333	5.38114	6.22091	5e-05	0.00749083	yes
GSBRNA2T00078774001	BnaA08g13410D	GSBRNA2G00078774001	GSBRNA2G00078774001	chrA08:11621550-11622840	UP	PC10	OK	2.19009	91.7719	5.38899	4.68623	0.00025	0.0273993	yes
GSBRNA2T00138909001	BnaA03g21590D	GSBRNA2G00138909001	GSBRNA2G00138909001	chrA03:10232719-10234788	UP	PC10	OK	5.95757	249.823	5.39004	6.36356	5e-05	0.00749083	yes
GSBRNA2T00008748001	BnaAnng12170D	GSBRNA2G00008748001	GSBRNA2G00008748001	chrAnn_random:13184824-13189220	UP	PC10	OK	0.454865	19.0798	5.39047	4.81326	0.0003	0.0315386	yes
GSBRNA2T00026279001	BnaC01g37680D	GSBRNA2G00026279001	GSBRNA2G00026279001	chrC01:36968831-36971523	UP	PC10	OK	6.82396	286.409	5.39132	6.01628	5e-05	0.00749083	yes
GSBRNA2T00030817001	BnaA02g26540D	GSBRNA2G00030817001	GSBRNA2G00030817001	chrA02:19586983-19589684	UP	PC10	OK	1.06301	44.9171	5.40104	4.86188	0.0003	0.0315386	yes
GSBRNA2T00113633001	BnaA03g39490D	GSBRNA2G00113633001	GSBRNA2G00113633001	chrA03:19704426-19706651	UP	PC10	OK	1.34402	57.2864	5.41357	5.32374	5e-05	0.00749083	yes
GSBRNA2T00108951001	BnaC08g25550D	GSBRNA2G00108951001	GSBRNA2G00108951001	chrC08:27233984-27238109	UP	PC10	OK	1.12116	47.8241	5.41467	6.26428	5e-05	0.00749083	yes
GSBRNA2T00088645001	BnaA04g26890D	GSBRNA2G00088645001	GSBRNA2G00088645001	chrA04:19011277-19012195	UP	PC10	OK	6.17113	263.415	5.41566	6.3946	5e-05	0.00749083	yes
GSBRNA2T00100044001	BnaC07g45340D	GSBRNA2G00100044001	GSBRNA2G00100044001	chrC07:43470227-43474640	UP	PC10	OK	2.45055	105.205	5.42395	6.37399	5e-05	0.00749083	yes
GSBRNA2T00153606001	BnaC03g32670D	GSBRNA2G00153606001	GSBRNA2G00153606001	chrC03:20021785-20027056	UP	PC10	OK	0.353427	15.1757	5.42421	5.00241	0.0002	0.023	yes
GSBRNA2T00087683001	BnaA01g22700D	GSBRNA2G00087683001	GSBRNA2G00087683001	chrA01:15012168-15012396	UP	PC10	OK	22.0175	950.335	5.43172	4.69562	0.0002	0.023	yes
GSBRNA2T00137442001	BnaA03g34960D	GSBRNA2G00137442001	GSBRNA2G00137442001	chrA03:17053224-17056487	UP	PC10	OK	0.540507	23.3938	5.43567	5.04106	5e-05	0.00749083	yes
GSBRNA2T00082682001	BnaC02g42230D	GSBRNA2G00082682001	GSBRNA2G00082682001	chrC02:44912864-44915189	UP	PC10	OK	0.553004	23.938	5.43587	4.71161	5e-05	0.00749083	yes
GSBRNA2T00053336001	BnaA04g27260D	GSBRNA2G00053336001	GSBRNA2G00053336001	chrA04_random:13561-14962	UP	PC10	OK	0.745025	32.3402	5.43989	4.79442	0.00015	0.0183254	yes
GSBRNA2T00006022001	BnaAnng03110D	GSBRNA2G00006022001	GSBRNA2G00006022001	chrAnn_random:2479088-2480144	UP	PC10	OK	1.20766	52.7344	5.44845	5.04155	5e-05	0.00749083	yes
GSBRNA2T00086855001	BnaA01g22900D	GSBRNA2G00086855001	GSBRNA2G00086855001	chrA01:15244579-15246305	UP	PC10	OK	0.715505	31.2524	5.44886	4.95779	0.00025	0.0273993	yes
GSBRNA2T00058434001	BnaA03g19250D	GSBRNA2G00058434001	GSBRNA2G00058434001	chrA03:9095209-9097196	UP	PC10	OK	0.568029	24.8161	5.44917	4.85537	0.0002	0.023	yes
GSBRNA2T00111896001	BnaA03g29100D	GSBRNA2G00111896001	GSBRNA2G00111896001	chrA03:14139727-14142333	UP	PC10	OK	1.50454	65.7851	5.45037	6.36986	5e-05	0.00749083	yes
GSBRNA2T00077121001	BnaCnng60280D	GSBRNA2G00077121001	GSBRNA2G00077121001	chrCnn_random:60038806-60040960	UP	PC10	OK	2.98657	130.952	5.4544	6.54116	5e-05	0.00749083	yes
GSBRNA2T00129640001	BnaA03g02030D	GSBRNA2G00129640001	GSBRNA2G00129640001	chrA03:939751-941250	UP	PC10	OK	2.23848	98.1554	5.45448	5.80257	5e-05	0.00749083	yes
GSBRNA2T00121876001	BnaA09g37510D	GSBRNA2G00121876001	GSBRNA2G00121876001	chrA09:26976173-26977760	UP	PC10	OK	3.03118	132.927	5.45461	5.41536	5e-05	0.00749083	yes
GSBRNA2T00020917001	BnaCnng31830D	GSBRNA2G00020917001	GSBRNA2G00020917001	chrCnn_random:30249218-30249483	UP	PC10	OK	24.0667	1056.35	5.45591	5.33632	5e-05	0.00749083	yes
GSBRNA2T00153567001	BnaC03g32350D	GSBRNA2G00153567001	GSBRNA2G00153567001	chrC03:19884600-19887518	UP	PC10	OK	1.39778	61.4344	5.45784	6.203	5e-05	0.00749083	yes
GSBRNA2T00025698001	BnaC08g50140D	GSBRNA2G00025698001	GSBRNA2G00025698001	chrC08_random:4498766-4500967	UP	PC10	OK	0.805415	35.4932	5.46166	4.77782	0.0001	0.0133125	yes
GSBRNA2T00107791001	BnaC01g11000D	GSBRNA2G00107791001	GSBRNA2G00107791001	chrC01:6789782-6790301	UP	PC10	OK	3.86123	171.167	5.4702	4.80543	0.0001	0.0133125	yes
GSBRNA2T00141196001	BnaC04g09250D	GSBRNA2G00141196001	GSBRNA2G00141196001	chrC04:7005379-7007460	UP	PC10	OK	1.12728	50.0964	5.47379	4.97217	0.0002	0.023	yes
GSBRNA2T00113071001	BnaC06g29240D	GSBRNA2G00113071001	GSBRNA2G00113071001	chrC06:30267734-30268808	UP	PC10	OK	0.742903	33.0222	5.47412	4.47545	0.0001	0.0133125	yes
GSBRNA2T00016719001	BnaCnng73190D	GSBRNA2G00016719001	GSBRNA2G00016719001	chrCnn_random:73683813-73684891	UP	PC10	OK	11.1409	500.005	5.488	6.52166	5e-05	0.00749083	yes
GSBRNA2T00097760001	BnaC03g72420D	GSBRNA2G00097760001	GSBRNA2G00097760001	chrC03_random:705618-707609	UP	PC10	OK	9.89882	445.014	5.49045	5.77774	5e-05	0.00749083	yes
GSBRNA2T00006585001	BnaC05g14670D	GSBRNA2G00006585001	GSBRNA2G00006585001	chrC05:8656458-8658208	UP	PC10	OK	0.568747	25.6452	5.49476	4.95497	0.0002	0.023	yes
GSBRNA2T00124570001	BnaC06g15410D	GSBRNA2G00124570001	GSBRNA2G00124570001	chrC06:18076976-18080931	UP	PC10	OK	0.492042	22.2612	5.4996	5.03892	0.00015	0.0183254	yes
GSBRNA2T00123616001	BnaC03g37910D	GSBRNA2G00123616001	GSBRNA2G00123616001	chrC03:23193115-23195975	UP	PC10	OK	5.12746	232.833	5.50491	6.45993	5e-05	0.00749083	yes
GSBRNA2T00065059001	BnaCnng08650D	GSBRNA2G00065059001	GSBRNA2G00065059001	chrCnn_random:8087173-8087905	UP	PC10	OK	2.68436	122.394	5.51082	4.84876	0.0001	0.0133125	yes
GSBRNA2T00055435001	BnaA02g30620D	GSBRNA2G00055435001	GSBRNA2G00055435001	chrA02:22119789-22122345	UP	PC10	OK	4.94913	225.782	5.51161	6.14088	5e-05	0.00749083	yes
GSBRNA2T00064714001	BnaC04g00460D	GSBRNA2G00064714001	GSBRNA2G00064714001	chrC04:370686-372710	UP	PC10	OK	5.95551	272.051	5.51351	6.15908	5e-05	0.00749083	yes
GSBRNA2T00005599001	BnaA01g26320D	GSBRNA2G00005599001	GSBRNA2G00005599001	chrA01:18388708-18391231	UP	PC10	OK	0.608464	27.8105	5.51431	4.7496	5e-05	0.00749083	yes
GSBRNA2T00076418001	BnaA01g29830D	GSBRNA2G00076418001	GSBRNA2G00076418001	chrA01:20617654-20620584	UP	PC10	OK	6.08448	280.968	5.52913	6.31226	5e-05	0.00749083	yes
GSBRNA2T00004423001	BnaC03g77110D	GSBRNA2G00004423001	GSBRNA2G00004423001	chrC03_random:5673744-5675889	UP	PC10	OK	1.22931	56.7686	5.52917	5.59299	5e-05	0.00749083	yes
GSBRNA2T00094938001	BnaA08g03570D	GSBRNA2G00094938001	GSBRNA2G00094938001	chrA08:2899574-2900108	UP	PC10	OK	3.11227	143.806	5.53001	4.93387	5e-05	0.00749083	yes
GSBRNA2T00067730001	BnaC05g10650D	GSBRNA2G00067730001	GSBRNA2G00067730001	chrC05:6125134-6127180	UP	PC10	OK	3.67101	171.058	5.54217	6.1887	5e-05	0.00749083	yes
GSBRNA2T00007829001	BnaC02g47960D	GSBRNA2G00007829001	GSBRNA2G00007829001	chrC02_random:4073097-4075518	UP	PC10	OK	1.44881	67.6859	5.54592	5.43813	5e-05	0.00749083	yes
GSBRNA2T00070572001	BnaA09g13690D	GSBRNA2G00070572001	GSBRNA2G00070572001	chrA09:7788430-7788670	UP	PC10	OK	88.3383	4128.1	5.5463	6.40186	5e-05	0.00749083	yes
GSBRNA2T00075915001	BnaCnng10780D	GSBRNA2G00075915001	GSBRNA2G00075915001	chrCnn_random:9953939-9957781	UP	PC10	OK	0.361598	16.9494	5.5507	4.886	0.0002	0.023	yes
GSBRNA2T00035606001	BnaA06g13170D	GSBRNA2G00035606001	GSBRNA2G00035606001	chrA06:6893622-6895361	UP	PC10	OK	0.528635	24.8215	5.55317	4.96185	0.0001	0.0133125	yes
GSBRNA2T00126366001	BnaA04g03610D	GSBRNA2G00126366001	GSBRNA2G00126366001	chrA04:2458405-2460621	UP	PC10	OK	3.01613	141.803	5.55505	6.57518	5e-05	0.00749083	yes
GSBRNA2T00153593001	BnaC03g32590D	GSBRNA2G00153593001	GSBRNA2G00153593001	chrC03:19989404-19990113	UP	PC10	OK	3.47287	163.417	5.55629	5.69312	5e-05	0.00749083	yes
GSBRNA2T00055941001	BnaC03g62750D	GSBRNA2G00055941001	GSBRNA2G00055941001	chrC03:51995539-51996921	UP	PC10	OK	2.07222	97.6564	5.55847	4.6846	0.0001	0.0133125	yes
GSBRNA2T00150427001	BnaA10g01390D	GSBRNA2G00150427001	GSBRNA2G00150427001	chrA10:738266-740715	UP	PC10	OK	2.81732	133.714	5.56868	6.1584	5e-05	0.00749083	yes
GSBRNA2T00031936001	BnaC05g03710D	GSBRNA2G00031936001	GSBRNA2G00031936001	chrC05:1805020-1808250	UP	PC10	OK	0.586252	27.8631	5.57069	4.88034	5e-05	0.00749083	yes
GSBRNA2T00105252001	BnaA06g06610D	GSBRNA2G00105252001	GSBRNA2G00105252001	chrA06:3562211-3562718	UP	PC10	OK	4.48716	215.035	5.58262	4.89687	0.0001	0.0133125	yes
GSBRNA2T00023808001	BnaC05g39970D	GSBRNA2G00023808001	GSBRNA2G00023808001	chrC05:38307762-38310436	UP	PC10	OK	5.53086	265.387	5.58445	6.23271	5e-05	0.00749083	yes
GSBRNA2T00087071001	BnaA10g03800D	GSBRNA2G00087071001	GSBRNA2G00087071001	chrA10:2024085-2027174	UP	PC10	OK	0.828261	39.897	5.59005	5.90877	5e-05	0.00749083	yes
GSBRNA2T00145925001	BnaC09g03550D	GSBRNA2G00145925001	GSBRNA2G00145925001	chrC09:2044062-2044893	UP	PC10	OK	1.81948	87.7641	5.59203	5.00429	0.00015	0.0183254	yes
GSBRNA2T00130773001	BnaC01g04350D	GSBRNA2G00130773001	GSBRNA2G00130773001	chrC01:2275873-2278006	UP	PC10	OK	1.75091	85.1711	5.60419	6.06863	5e-05	0.00749083	yes
GSBRNA2T00017673001	BnaA08g29220D	GSBRNA2G00017673001	GSBRNA2G00017673001	chrA08_random:69466-72262	UP	PC10	OK	1.78784	86.9796	5.60439	6.28957	5e-05	0.00749083	yes
GSBRNA2T00024443001	BnaC03g17520D	GSBRNA2G00024443001	GSBRNA2G00024443001	chrC03:8957043-8960297	UP	PC10	OK	0.724845	35.3528	5.60801	5.05073	0.00015	0.0183254	yes
GSBRNA2T00138784001	BnaA03g22710D	GSBRNA2G00138784001	GSBRNA2G00138784001	chrA03:10799440-10801830	UP	PC10	OK	1.29617	63.2258	5.60818	5.85782	5e-05	0.00749083	yes
GSBRNA2T00041321001	BnaCnng05770D	GSBRNA2G00041321001	GSBRNA2G00041321001	chrCnn_random:5346171-5348294	UP	PC10	OK	5.97131	292.023	5.61189	6.34091	5e-05	0.00749083	yes
GSBRNA2T00057320001	BnaA09g41420D	GSBRNA2G00057320001	GSBRNA2G00057320001	chrA09:28945071-28948675	UP	PC10	OK	0.983966	48.1565	5.61298	5.69329	5e-05	0.00749083	yes
GSBRNA2T00140403001	BnaC03g06470D	GSBRNA2G00140403001	GSBRNA2G00140403001	chrC03:3114002-3114431	UP	PC10	OK	5.58248	274.23	5.61834	4.62791	5e-05	0.00749083	yes
GSBRNA2T00099470001	BnaA07g22480D	GSBRNA2G00099470001	GSBRNA2G00099470001	chrA07:17137950-17143065	UP	PC10	OK	0.374174	18.3899	5.61906	5.15075	0.0001	0.0133125	yes
GSBRNA2T00076300001	BnaC05g48590D	GSBRNA2G00076300001	GSBRNA2G00076300001	chrC05:43015086-43020684	UP	PC10	OK	0.224128	11.0793	5.6274	4.89227	0.00015	0.0183254	yes
GSBRNA2T00063187001	BnaC06g12590D	GSBRNA2G00063187001	GSBRNA2G00063187001	chrC06:15163559-15166457	UP	PC10	OK	0.36292	17.9991	5.63213	4.94925	0.0002	0.023	yes
GSBRNA2T00126934001	BnaA08g08890D	GSBRNA2G00126934001	GSBRNA2G00126934001	chrA08:8613718-8614952	UP	PC10	OK	2.35661	117.203	5.63616	4.74804	0.0003	0.0315386	yes
GSBRNA2T00045084001	BnaA04g24900D	GSBRNA2G00045084001	GSBRNA2G00045084001	chrA04:18111650-18114109	UP	PC10	OK	0.598041	29.7581	5.63689	5.13713	0.00025	0.0273993	yes
GSBRNA2T00093336001	BnaAnng31850D	GSBRNA2G00093336001	GSBRNA2G00093336001	chrAnn_random:36425122-36427929	UP	PC10	OK	0.853038	42.4558	5.63721	5.21204	0.0001	0.0133125	yes
GSBRNA2T00121277001	BnaA01g03090D	GSBRNA2G00121277001	GSBRNA2G00121277001	chrA01:1492366-1494367	UP	PC10	OK	2.10876	105.17	5.64018	6.11686	5e-05	0.00749083	yes
GSBRNA2T00004537001	BnaA08g11700D	GSBRNA2G00004537001	GSBRNA2G00004537001	chrA08:10533745-10535728	UP	PC10	OK	1.49137	74.4963	5.64246	5.47538	5e-05	0.00749083	yes
GSBRNA2T00052472001	BnaA09g51020D	GSBRNA2G00052472001	GSBRNA2G00052472001	chrA09:33632579-33635046	UP	PC10	OK	0.507812	25.4691	5.64831	5.16916	0.0001	0.0133125	yes
GSBRNA2T00078573001	BnaC02g01620D	GSBRNA2G00078573001	GSBRNA2G00078573001	chrC02:659607-661469	UP	PC10	OK	2.74118	137.933	5.65303	6.22976	5e-05	0.00749083	yes
GSBRNA2T00133996001	BnaC08g05510D	GSBRNA2G00133996001	GSBRNA2G00133996001	chrC08:7393684-7395545	UP	PC10	OK	0.805731	40.7433	5.66012	4.88717	5e-05	0.00749083	yes
GSBRNA2T00079391001	BnaA05g25890D	GSBRNA2G00079391001	GSBRNA2G00079391001	chrA05:19066481-19069161	UP	PC10	OK	5.01125	255.896	5.67424	6.25095	5e-05	0.00749083	yes
GSBRNA2T00025657001	BnaCnng76410D	GSBRNA2G00025657001	GSBRNA2G00025657001	chrCnn_random:77586501-77588482	UP	PC10	OK	15.6956	802.507	5.67608	4.21722	0.00015	0.0183254	yes
GSBRNA2T00134749001	BnaC09g06650D	GSBRNA2G00134749001	GSBRNA2G00134749001	chrC09:4089007-4091216	UP	PC10	OK	0.749463	38.4892	5.68245	4.81575	0.00025	0.0273993	yes
GSBRNA2T00008753001	BnaAnng12200D	GSBRNA2G00008753001	GSBRNA2G00008753001	chrAnn_random:13197917-13200091	UP	PC10	OK	1.08821	56.3483	5.69434	5.7412	5e-05	0.00749083	yes
GSBRNA2T00114961001	BnaC02g11010D	GSBRNA2G00114961001	GSBRNA2G00114961001	chrC02:6390677-6393782	UP	PC10	OK	0.736529	38.2756	5.69954	5.85756	5e-05	0.00749083	yes
GSBRNA2T00136391001	BnaA10g26020D	GSBRNA2G00136391001	GSBRNA2G00136391001	chrA10:16659270-16660991	UP	PC10	OK	1.68414	87.531	5.69971	5.8329	5e-05	0.00749083	yes
GSBRNA2T00117797001	BnaA09g19110D	GSBRNA2G00117797001	GSBRNA2G00117797001	chrA09:12016068-12017988	UP	PC10	OK	0.833998	43.3669	5.70041	5.24866	0.00015	0.0183254	yes
GSBRNA2T00129599001	BnaA09g34580D	GSBRNA2G00129599001	GSBRNA2G00129599001	chrA09:25318216-25322898	UP	PC10	OK	0.771343	40.1943	5.70348	5.82453	5e-05	0.00749083	yes
GSBRNA2T00115121001	BnaC04g25940D	GSBRNA2G00115121001	GSBRNA2G00115121001	chrC04:27173449-27177743	UP	PC10	OK	0.855609	44.7081	5.70744	5.93177	5e-05	0.00749083	yes
GSBRNA2T00032509001	BnaC03g70650D	GSBRNA2G00032509001	GSBRNA2G00032509001	chrC03:60268300-60271136	UP	PC10	OK	1.56628	82.1469	5.7128	6.20713	5e-05	0.00749083	yes
GSBRNA2T00029427001	BnaC01g29960D	GSBRNA2G00029427001	GSBRNA2G00029427001	chrC01:28368543-28370450	UP	PC10	OK	0.774311	40.6463	5.71407	5.20345	5e-05	0.00749083	yes
GSBRNA2T00034378001	BnaC03g76390D	GSBRNA2G00034378001	GSBRNA2G00034378001	chrC03_random:5028567-5029362	UP	PC10	OK	1.13801	60.1863	5.72486	4.60407	0.00025	0.0273993	yes
GSBRNA2T00018283001	BnaC09g00590D	GSBRNA2G00018283001	GSBRNA2G00018283001	chrC09:293783-294242	UP	PC10	OK	2.74175	145.552	5.73029	5.34185	0.00045	0.0441794	yes
GSBRNA2T00092029001	BnaA08g04750D	GSBRNA2G00092029001	GSBRNA2G00092029001	chrA08:4558016-4559917	UP	PC10	OK	1.3668	72.9211	5.73746	5.68416	5e-05	0.00749083	yes
GSBRNA2T00132123001	BnaC06g18960D	GSBRNA2G00132123001	GSBRNA2G00132123001	chrC06:21314284-21317081	UP	PC10	OK	0.596303	31.8991	5.74132	5.10901	5e-05	0.00749083	yes
GSBRNA2T00103095001	BnaA08g23970D	GSBRNA2G00103095001	GSBRNA2G00103095001	chrA08:16932151-16934369	UP	PC10	OK	2.08177	111.908	5.74836	6.51977	5e-05	0.00749083	yes
GSBRNA2T00070573001	BnaA09g13680D	GSBRNA2G00070573001	GSBRNA2G00070573001	chrA09:7785550-7786049	UP	PC10	OK	5.66835	304.732	5.74847	5.6862	5e-05	0.00749083	yes
GSBRNA2T00142075001	BnaA03g14480D	GSBRNA2G00142075001	GSBRNA2G00142075001	chrA03:6666240-6669454	UP	PC10	OK	0.551179	29.6394	5.74885	5.39392	5e-05	0.00749083	yes
GSBRNA2T00132966001	BnaA05g00810D	GSBRNA2G00132966001	GSBRNA2G00132966001	chrA05:471115-475305	UP	PC10	OK	2.78591	149.909	5.74979	6.26685	5e-05	0.00749083	yes
GSBRNA2T00123903001	BnaC03g39840D	GSBRNA2G00123903001	GSBRNA2G00123903001	chrC03:24856755-24858851	UP	PC10	OK	2.60629	140.288	5.75025	6.34338	5e-05	0.00749083	yes
GSBRNA2T00073954001	BnaA01g05340D	GSBRNA2G00073954001	GSBRNA2G00073954001	chrA01:2506614-2509194	UP	PC10	OK	0.432319	23.2889	5.7514	5.24435	5e-05	0.00749083	yes
GSBRNA2T00101719001	BnaC05g35370D	GSBRNA2G00101719001	GSBRNA2G00101719001	chrC05:34656836-34657873	UP	PC10	OK	1.21425	65.5377	5.75419	5.08147	5e-05	0.00749083	yes
GSBRNA2T00055652001	BnaCnng52120D	GSBRNA2G00055652001	GSBRNA2G00055652001	chrCnn_random:51573312-51573705	UP	PC10	OK	3.47848	187.815	5.75471	4.78969	0.0001	0.0133125	yes
GSBRNA2T00046831001	BnaC09g52000D	GSBRNA2G00046831001	GSBRNA2G00046831001	chrC09_random:1247514-1249888	UP	PC10	OK	2.84782	154.344	5.76015	5.85447	5e-05	0.00749083	yes
GSBRNA2T00137501001	BnaA03g34410D	GSBRNA2G00137501001	GSBRNA2G00137501001	chrA03:16754313-16755968	UP	PC10	OK	2.83787	153.833	5.76041	6.41794	5e-05	0.00749083	yes
GSBRNA2T00064675001	BnaA10g05640D	GSBRNA2G00064675001	GSBRNA2G00064675001	chrA10:3437742-3438667	UP	PC10	OK	2.88215	156.42	5.76214	5.9269	5e-05	0.00749083	yes
GSBRNA2T00050923001	BnaAnng21170D	GSBRNA2G00050923001	GSBRNA2G00050923001	chrAnn_random:23550039-23552691	UP	PC10	OK	0.999121	54.4703	5.76867	6.22337	5e-05	0.00749083	yes
GSBRNA2T00042563001	BnaA04g27680D	GSBRNA2G00042563001	GSBRNA2G00042563001	chrA04_random:218842-220395	UP	PC10	OK	0.960531	52.4039	5.7697	4.90528	0.0001	0.0133125	yes
GSBRNA2T00066162001	BnaC03g26740D	GSBRNA2G00066162001	GSBRNA2G00066162001	chrC03:15296379-15298757	UP	PC10	OK	1.14294	62.4487	5.77185	5.99525	5e-05	0.00749083	yes
GSBRNA2T00081694001	BnaA06g09240D	GSBRNA2G00081694001	GSBRNA2G00081694001	chrA06:4990237-4992243	UP	PC10	OK	2.32782	127.771	5.77844	6.50123	5e-05	0.00749083	yes
GSBRNA2T00102084001	BnaA07g26840D	GSBRNA2G00102084001	GSBRNA2G00102084001	chrA07:19612216-19613302	UP	PC10	OK	0.547637	30.1489	5.78274	4.58892	0.0003	0.0315386	yes
GSBRNA2T00059842001	BnaC03g41680D	GSBRNA2G00059842001	GSBRNA2G00059842001	chrC03:26574668-26577368	UP	PC10	OK	0.639127	35.1967	5.78319	5.23589	5e-05	0.00749083	yes
GSBRNA2T00133481001	BnaC07g30310D	GSBRNA2G00133481001	GSBRNA2G00133481001	chrC07:34854462-34855444	UP	PC10	OK	3.41828	188.557	5.78559	5.49833	5e-05	0.00749083	yes
GSBRNA2T00137338001	BnaA03g35840D	GSBRNA2G00137338001	GSBRNA2G00137338001	chrA03:17499785-17502483	UP	PC10	OK	0.587313	32.4902	5.78973	5.31609	0.0001	0.0133125	yes
GSBRNA2T00153670001	BnaC03g33160D	GSBRNA2G00153670001	GSBRNA2G00153670001	chrC03:20253717-20256112	UP	PC10	OK	0.601038	33.3097	5.79234	5.40789	0.00015	0.0183254	yes
GSBRNA2T00112084001	BnaA03g27560D	GSBRNA2G00112084001	GSBRNA2G00112084001	chrA03:13562108-13562743	UP	PC10	OK	4.43741	246.512	5.7958	5.80292	5e-05	0.00749083	yes
GSBRNA2T00071518001	BnaA03g53130D	GSBRNA2G00071518001	GSBRNA2G00071518001	chrA03:27788160-27792685	UP	PC10	OK	1.30945	72.9758	5.80038	6.71703	5e-05	0.00749083	yes
GSBRNA2T00066886001	BnaAnng25230D	GSBRNA2G00066886001	GSBRNA2G00066886001	chrAnn_random:29253826-29255946	UP	PC10	OK	0.52924	29.6287	5.80693	5.23405	5e-05	0.00749083	yes
GSBRNA2T00156918001	BnaC07g36660D	GSBRNA2G00156918001	GSBRNA2G00156918001	chrC07:38634414-38637827	UP	PC10	OK	0.964339	54.1562	5.81144	6.12716	5e-05	0.00749083	yes
GSBRNA2T00146830001	BnaC02g31900D	GSBRNA2G00146830001	GSBRNA2G00146830001	chrC02:34338309-34339960	UP	PC10	OK	2.25438	127.286	5.81919	4.83604	0.0001	0.0133125	yes
GSBRNA2T00021941001	BnaC04g48730D	GSBRNA2G00021941001	GSBRNA2G00021941001	chrC04:47239159-47241726	UP	PC10	OK	0.572595	32.3491	5.82007	5.08712	0.00025	0.0273993	yes
GSBRNA2T00039631001	BnaCnng42690D	GSBRNA2G00039631001	GSBRNA2G00039631001	chrCnn_random:41740410-41742712	UP	PC10	OK	0.513588	29.0308	5.82083	5.52441	0.0001	0.0133125	yes
GSBRNA2T00097432001	BnaAnng10550D	GSBRNA2G00097432001	GSBRNA2G00097432001	chrAnn_random:11467979-11469049	UP	PC10	OK	1.76345	100.604	5.83414	5.7351	5e-05	0.00749083	yes
GSBRNA2T00130944001	BnaC01g02960D	GSBRNA2G00130944001	GSBRNA2G00130944001	chrC01:1544537-1545293	UP	PC10	OK	1.82058	104.069	5.837	5.21406	5e-05	0.00749083	yes
GSBRNA2T00120565001	BnaC02g39350D	GSBRNA2G00120565001	GSBRNA2G00120565001	chrC02:42281995-42284945	UP	PC10	OK	0.271129	15.5076	5.83785	4.94146	0.00015	0.0183254	yes
GSBRNA2T00148820001	BnaA03g08850D	GSBRNA2G00148820001	GSBRNA2G00148820001	chrA03:4014805-4015543	UP	PC10	OK	6.2936	361.337	5.84332	5.99908	5e-05	0.00749083	yes
GSBRNA2T00105340001	BnaA06g07350D	GSBRNA2G00105340001	GSBRNA2G00105340001	chrA06:3910318-3911914	UP	PC10	OK	1.18695	68.5442	5.8517	5.85751	5e-05	0.00749083	yes
GSBRNA2T00005168001	BnaAnng11370D	GSBRNA2G00005168001	GSBRNA2G00005168001	chrAnn_random:12327596-12329902	UP	PC10	OK	2.87928	167.041	5.85835	5.82159	5e-05	0.00749083	yes
GSBRNA2T00028596001	BnaA03g59650D	GSBRNA2G00028596001	GSBRNA2G00028596001	chrA03_random:3711565-3713635	UP	PC10	OK	0.925436	53.9265	5.86472	5.18845	0.0002	0.023	yes
GSBRNA2T00053804001	BnaC09g22170D	GSBRNA2G00053804001	GSBRNA2G00053804001	chrC09:19459400-19462525	UP	PC10	OK	3.20066	189.177	5.88522	6.54135	5e-05	0.00749083	yes
GSBRNA2T00059182001	BnaC03g58650D	GSBRNA2G00059182001	GSBRNA2G00059182001	chrC03:47932195-47933972	UP	PC10	OK	1.23806	73.9244	5.8999	6.0545	5e-05	0.00749083	yes
GSBRNA2T00082473001	BnaCnng13510D	GSBRNA2G00082473001	GSBRNA2G00082473001	chrCnn_random:12263113-12265791	UP	PC10	OK	1.60972	96.4812	5.90537	6.40525	5e-05	0.00749083	yes
GSBRNA2T00113116001	BnaC02g28140D	GSBRNA2G00113116001	GSBRNA2G00113116001	chrC02:26444382-26445280	UP	PC10	OK	2.17711	130.884	5.90973	5.61086	5e-05	0.00749083	yes
GSBRNA2T00147499001	BnaA06g26670D	GSBRNA2G00147499001	GSBRNA2G00147499001	chrA06:18318912-18319847	UP	PC10	OK	3.65149	222.007	5.92598	4.69887	0.0001	0.0133125	yes
GSBRNA2T00138908001	BnaA03g21600D	GSBRNA2G00138908001	GSBRNA2G00138908001	chrA03:10239150-10239801	UP	PC10	OK	3.1033	190.719	5.9415	5.73501	5e-05	0.00749083	yes
GSBRNA2T00099054001	BnaA07g18960D	GSBRNA2G00099054001	GSBRNA2G00099054001	chrA07:15274873-15277625	UP	PC10	OK	1.34613	82.7445	5.94177	5.96613	5e-05	0.00749083	yes
GSBRNA2T00143224001	BnaA02g02970D	GSBRNA2G00143224001	GSBRNA2G00143224001	chrA02:1313417-1315459	UP	PC10	OK	0.793983	49.31	5.95663	5.23131	0.0001	0.0133125	yes
GSBRNA2T00023642001	BnaA03g58460D	GSBRNA2G00023642001	GSBRNA2G00023642001	chrA03_random:1696868-1700308	UP	PC10	OK	0.836714	52.3303	5.96677	6.39489	5e-05	0.00749083	yes
GSBRNA2T00128546001	BnaC07g18740D	GSBRNA2G00128546001	GSBRNA2G00128546001	chrC07:25406272-25407506	UP	PC10	OK	3.36403	210.687	5.96876	5.89504	5e-05	0.00749083	yes
GSBRNA2T00057413001	BnaA09g47760D	GSBRNA2G00057413001	GSBRNA2G00057413001	chrA09:32145667-32146174	UP	PC10	OK	6.99579	439.213	5.97229	5.83701	5e-05	0.00749083	yes
GSBRNA2T00089546001	BnaCnng64550D	GSBRNA2G00089546001	GSBRNA2G00089546001	chrCnn_random:64319926-64322246	UP	PC10	OK	0.996139	62.9932	5.9827	6.18132	5e-05	0.00749083	yes
GSBRNA2T00041326001	BnaCnng05800D	GSBRNA2G00041326001	GSBRNA2G00041326001	chrCnn_random:5354794-5361680	UP	PC10	OK	1.66042	106.179	5.9988	6.36366	5e-05	0.00749083	yes
GSBRNA2T00025694001	BnaC08g50100D	GSBRNA2G00025694001	GSBRNA2G00025694001	chrC08_random:4485976-4489932	UP	PC10	OK	0.319352	20.4712	6.0023	5.35592	5e-05	0.00749083	yes
GSBRNA2T00121417001	BnaA01g01830D	GSBRNA2G00121417001	GSBRNA2G00121417001	chrA01:941867-942626	UP	PC10	OK	1.92677	124.429	6.013	5.43291	0.0001	0.0133125	yes
GSBRNA2T00095197001	BnaA05g10500D	GSBRNA2G00095197001	GSBRNA2G00095197001	chrA05:5743578-5747863	UP	PC10	OK	0.563299	36.8811	6.03284	6.19694	5e-05	0.00749083	yes
GSBRNA2T00144294001	BnaA06g29240D	GSBRNA2G00144294001	GSBRNA2G00144294001	chrA06:19969923-19971443	UP	PC10	OK	1.15331	76.1942	6.04583	5.30962	0.00015	0.0183254	yes
GSBRNA2T00016772001	BnaA02g36510D	GSBRNA2G00016772001	GSBRNA2G00016772001	chrA02_random:996219-997101	UP	PC10	OK	3.50872	231.971	6.04685	5.91087	5e-05	0.00749083	yes
GSBRNA2T00098887001	BnaA07g17460D	GSBRNA2G00098887001	GSBRNA2G00098887001	chrA07:14618299-14618999	UP	PC10	OK	4.70401	316.032	6.07004	7.56185	5e-05	0.00749083	yes
GSBRNA2T00091526001	BnaC07g27480D	GSBRNA2G00091526001	GSBRNA2G00091526001	chrC07:32987070-32988476	UP	PC10	OK	0.970262	66.061	6.08928	5.3928	5e-05	0.00749083	yes
GSBRNA2T00009018001	BnaC04g11500D	GSBRNA2G00009018001	GSBRNA2G00009018001	chrC04:8987934-8991938	UP	PC10	OK	0.490079	33.7112	6.10407	6.06016	5e-05	0.00749083	yes
GSBRNA2T00077251001	BnaAnng07690D	GSBRNA2G00077251001	GSBRNA2G00077251001	chrAnn_random:7427276-7429367	UP	PC10	OK	0.971857	66.867	6.10441	5.38255	0.0001	0.0133125	yes
GSBRNA2T00111559001	BnaA03g31930D	GSBRNA2G00111559001	GSBRNA2G00111559001	chrA03:15420095-15421395	UP	PC10	OK	1.04507	73.4608	6.1353	5.23502	0.0004	0.0402382	yes
GSBRNA2T00093597001	BnaA02g27380D	GSBRNA2G00093597001	GSBRNA2G00093597001	chrA02:20184060-20186383	UP	PC10	OK	1.43102	102.235	6.1587	6.17071	5e-05	0.00749083	yes
GSBRNA2T00111935001	BnaA03g28740D	GSBRNA2G00111935001	GSBRNA2G00111935001	chrA03:14000826-14002404	UP	PC10	OK	2.83132	213.28	6.23513	6.34454	5e-05	0.00749083	yes
GSBRNA2T00065417001	BnaC02g06390D	GSBRNA2G00065417001	GSBRNA2G00065417001	chrC02:3417337-3419373	UP	PC10	OK	0.469973	38.7168	6.36424	5.34702	0.00015	0.0183254	yes
GSBRNA2T00090546001	BnaC08g40000D	GSBRNA2G00090546001	GSBRNA2G00090546001	chrC08:35413816-35416638	UP	PC10	OK	0.412046	37.0924	6.49218	5.30743	0.00025	0.0273993	yes
GSBRNA2T00049050001	BnaC06g23370D	GSBRNA2G00049050001	GSBRNA2G00049050001	chrC06:25252072-25257113	UP	PC10	OK	0.207582	20.2764	6.60998	5.69666	0.00015	0.0183254	yes
GSBRNA2T00055207001	BnaA09g45930D	GSBRNA2G00055207001	GSBRNA2G00055207001	chrA09:31302568-31304884	UP	PC10	OK	0.388086	38.032	6.61469	5.42699	0.00025	0.0273993	yes

## Sheet: UP VS PC20
test_id	Bna_gene_id	gene_id	gene	locus	sample_1	sample_2	status	value_1	value_2	log2(fold_change)	test_stat	p_value	q_value	significant
GSBRNA2T00146462001	BnaA07g33960D	GSBRNA2G00146462001	GSBRNA2G00146462001	chrA07:23203166-23205791	UP	PC20	OK	11.2746	0.547881	-4.36306	-4.05382	0.00025	0.0123267	yes
GSBRNA2T00119675001	BnaAnng01300D	GSBRNA2G00119675001	GSBRNA2G00119675001	chrAnn_random:792696-794589	UP	PC20	OK	916.825	52.697	-4.12085	-2.95843	0.0009	0.034061	yes
GSBRNA2T00044742001	BnaC05g37000D	GSBRNA2G00044742001	GSBRNA2G00044742001	chrC05:36193469-36197696	UP	PC20	OK	2.28773	0.167928	-3.768	-3.29748	0.0014	0.0478684	yes
GSBRNA2T00019055001	BnaC03g23030D	GSBRNA2G00019055001	GSBRNA2G00019055001	chrC03:12746233-12747367	UP	PC20	OK	14.8017	1.13002	-3.71134	-3.53946	0.00075	0.0297778	yes
GSBRNA2T00134543001	BnaC03g03510D	GSBRNA2G00134543001	GSBRNA2G00134543001	chrC03:1712806-1713415	UP	PC20	OK	23.5959	1.85298	-3.67062	-3.60148	0.0009	0.034061	yes
GSBRNA2T00088744001	BnaA06g33560D	GSBRNA2G00088744001	GSBRNA2G00088744001	chrA06:22291324-22291837	UP	PC20	OK	22.8413	1.94544	-3.55348	-3.53606	0.0011	0.0398877	yes
GSBRNA2T00047455001	BnaA02g34510D	GSBRNA2G00047455001	GSBRNA2G00047455001	chrA02:24582144-24586321	UP	PC20	OK	8.97823	0.78573	-3.51433	-3.30772	0.00125	0.0440112	yes
GSBRNA2T00039889001	BnaA01g06750D	GSBRNA2G00039889001	GSBRNA2G00039889001	chrA01:3132438-3133759	UP	PC20	OK	14.2967	1.29111	-3.469	-3.79169	0.0001	0.00574178	yes
GSBRNA2T00100243001	BnaC07g46910D	GSBRNA2G00100243001	GSBRNA2G00100243001	chrC07:44433888-44436052	UP	PC20	OK	18.2428	1.6711	-3.44846	-4.51052	5e-05	0.00315052	yes
GSBRNA2T00024508001	BnaC03g16990D	GSBRNA2G00024508001	GSBRNA2G00024508001	chrC03:8642738-8645726	UP	PC20	OK	32.6089	3.10062	-3.39464	-5.00186	5e-05	0.00315052	yes
GSBRNA2T00092809001	BnaAnng31630D	GSBRNA2G00092809001	GSBRNA2G00092809001	chrAnn_random:36218513-36220929	UP	PC20	OK	7.57181	0.773234	-3.29166	-3.81991	5e-05	0.00315052	yes
GSBRNA2T00147475001	BnaA06g26510D	GSBRNA2G00147475001	GSBRNA2G00147475001	chrA06:18226244-18228489	UP	PC20	OK	28.9417	3.16791	-3.19155	-4.47671	5e-05	0.00315052	yes
GSBRNA2T00129695001	BnaA03g02500D	GSBRNA2G00129695001	GSBRNA2G00129695001	chrA03:1129248-1130013	UP	PC20	OK	25.9252	2.87043	-3.17502	-3.79426	5e-05	0.00315052	yes
GSBRNA2T00049303001	BnaA03g01070D	GSBRNA2G00049303001	GSBRNA2G00049303001	chrA03:472765-475042	UP	PC20	OK	103.675	12.0227	-3.10824	-4.5622	5e-05	0.00315052	yes
GSBRNA2T00104838001	BnaA05g24610D	GSBRNA2G00104838001	GSBRNA2G00104838001	chrA05:18363084-18368202	UP	PC20	OK	3.11752	0.371677	-3.06828	-3.18731	0.0006	0.0251389	yes
GSBRNA2T00058430001	BnaA03g19290D	GSBRNA2G00058430001	GSBRNA2G00058430001	chrA03:9109164-9111517	UP	PC20	OK	16.5173	2.07017	-2.99616	-4.09871	5e-05	0.00315052	yes
GSBRNA2T00104090001	BnaC09g45170D	GSBRNA2G00104090001	GSBRNA2G00104090001	chrC09:45655370-45657448	UP	PC20	OK	11.8226	1.51896	-2.96039	-3.46721	0.0001	0.00574178	yes
GSBRNA2T00115928001	BnaC09g10140D	GSBRNA2G00115928001	GSBRNA2G00115928001	chrC09:6753820-6756780	UP	PC20	OK	19.3442	2.65505	-2.86509	-3.97479	5e-05	0.00315052	yes
GSBRNA2T00033566001	BnaC06g05990D	GSBRNA2G00033566001	GSBRNA2G00033566001	chrC06:6493883-6495189	UP	PC20	OK	10.8759	1.50438	-2.8539	-3.17145	0.0007	0.0284206	yes
GSBRNA2T00069041001	BnaC02g00130D	GSBRNA2G00069041001	GSBRNA2G00069041001	chrC02:33252-35278	UP	PC20	OK	9.26061	1.28989	-2.84386	-3.17966	0.0002	0.0102143	yes
GSBRNA2T00134676001	BnaC09g06210D	GSBRNA2G00134676001	GSBRNA2G00134676001	chrC09:3749932-3751008	UP	PC20	OK	9.72995	1.394	-2.8032	-3.01253	0.0008	0.0311762	yes
GSBRNA2T00064342001	BnaAnng24430D	GSBRNA2G00064342001	GSBRNA2G00064342001	chrAnn_random:28281560-28284540	UP	PC20	OK	6.47926	0.934387	-2.79374	-2.95463	0.0009	0.034061	yes
GSBRNA2T00020115001	BnaC05g37800D	GSBRNA2G00020115001	GSBRNA2G00020115001	chrC05:36663674-36664754	UP	PC20	OK	46.279	6.68708	-2.79091	-4.46607	5e-05	0.00315052	yes
GSBRNA2T00104341001	BnaA02g20850D	GSBRNA2G00104341001	GSBRNA2G00104341001	chrA02:13170645-13171343	UP	PC20	OK	26.0084	3.83609	-2.76127	-3.26628	0.0002	0.0102143	yes
GSBRNA2T00019051001	BnaC03g22990D	GSBRNA2G00019051001	GSBRNA2G00019051001	chrC03:12743159-12744040	UP	PC20	OK	19.8699	2.98146	-2.73649	-3.17624	0.0004	0.0180197	yes
GSBRNA2T00120614001	BnaC02g39030D	GSBRNA2G00120614001	GSBRNA2G00120614001	chrC02:42022703-42028747	UP	PC20	OK	3.35506	0.506251	-2.72841	-3.03508	0.00105	0.0384482	yes
GSBRNA2T00017079001	BnaCnng73390D	GSBRNA2G00017079001	GSBRNA2G00017079001	chrCnn_random:73943409-73943922	UP	PC20	OK	45.1439	6.92616	-2.7044	-3.55202	0.0001	0.00574178	yes
GSBRNA2T00036115001	BnaCnng39740D	GSBRNA2G00036115001	GSBRNA2G00036115001	chrCnn_random:38336295-38337720	UP	PC20	OK	17.8449	2.74349	-2.70143	-3.30968	0.0001	0.00574178	yes
GSBRNA2T00104904001	BnaA05g24100D	GSBRNA2G00104904001	GSBRNA2G00104904001	chrA05:18143906-18144962	UP	PC20	OK	26.7647	4.12464	-2.69799	-3.90369	5e-05	0.00315052	yes
GSBRNA2T00056381001	BnaA01g14450D	GSBRNA2G00056381001	GSBRNA2G00056381001	chrA01:7296381-7299947	UP	PC20	OK	59.8506	9.2264	-2.69753	-3.85956	5e-05	0.00315052	yes
GSBRNA2T00094264001	BnaUnng03570D	GSBRNA2G00094264001	GSBRNA2G00094264001	chrUnn_random:5067934-5068651	UP	PC20	OK	124.15	19.2382	-2.69003	-4.31788	5e-05	0.00315052	yes
GSBRNA2T00091622001	BnaA09g10050D	GSBRNA2G00091622001	GSBRNA2G00091622001	chrA09:5089031-5092048	UP	PC20	OK	86.1649	13.3537	-2.68987	-4.4695	5e-05	0.00315052	yes
GSBRNA2T00019633001	BnaCnng30450D	GSBRNA2G00019633001	GSBRNA2G00019633001	chrCnn_random:28963812-28966966	UP	PC20	OK	13.7836	2.14329	-2.68506	-3.81734	5e-05	0.00315052	yes
GSBRNA2T00095409001	BnaA10g09490D	GSBRNA2G00095409001	GSBRNA2G00095409001	chrA10:8349566-8353664	UP	PC20	OK	15.2444	2.39138	-2.67237	-3.80785	5e-05	0.00315052	yes
GSBRNA2T00116244001	BnaC03g67980D	GSBRNA2G00116244001	GSBRNA2G00116244001	chrC03:57586078-57587828	UP	PC20	OK	11.044	1.74025	-2.66589	-3.28675	0.0002	0.0102143	yes
GSBRNA2T00128236001	BnaA07g05380D	GSBRNA2G00128236001	GSBRNA2G00128236001	chrA07:5743766-5749308	UP	PC20	OK	34.9942	5.77404	-2.59946	-4.1594	5e-05	0.00315052	yes
GSBRNA2T00134289001	BnaC03g01430D	GSBRNA2G00134289001	GSBRNA2G00134289001	chrC03:663491-665442	UP	PC20	OK	31.6527	5.23104	-2.59716	-3.89047	5e-05	0.00315052	yes
GSBRNA2T00006211001	BnaC01g20890D	GSBRNA2G00006211001	GSBRNA2G00006211001	chrC01:14587436-14588861	UP	PC20	OK	12.305	2.07079	-2.57099	-3.29244	0.00015	0.00807736	yes
GSBRNA2T00097708001	BnaA05g37400D	GSBRNA2G00097708001	GSBRNA2G00097708001	chrA05_random:2979452-2981047	UP	PC20	OK	15.1774	2.59498	-2.54813	-3.62832	5e-05	0.00315052	yes
GSBRNA2T00079538001	BnaA01g13110D	GSBRNA2G00079538001	GSBRNA2G00079538001	chrA01:6572653-6573367	UP	PC20	OK	43.7088	7.49518	-2.54389	-3.3738	0.0001	0.00574178	yes
GSBRNA2T00153585001	BnaC03g32510D	GSBRNA2G00153585001	GSBRNA2G00153585001	chrC03:19959936-19966952	UP	PC20	OK	10.4043	1.81965	-2.51544	-3.80255	5e-05	0.00315052	yes
GSBRNA2T00086546001	BnaCnng62910D	GSBRNA2G00086546001	GSBRNA2G00086546001	chrCnn_random:62692213-62692766	UP	PC20	OK	23.9884	4.23123	-2.50319	-2.94	0.0005	0.0215827	yes
GSBRNA2T00137826001	BnaC07g02460D	GSBRNA2G00137826001	GSBRNA2G00137826001	chrC07:3143863-3145102	UP	PC20	OK	12.3092	2.175	-2.50065	-3.29409	5e-05	0.00315052	yes
GSBRNA2T00130296001	BnaC01g08130D	GSBRNA2G00130296001	GSBRNA2G00130296001	chrC01:4310574-4311915	UP	PC20	OK	14.8054	2.63267	-2.49152	-3.21726	0.0004	0.0180197	yes
GSBRNA2T00121378001	BnaA01g02210D	GSBRNA2G00121378001	GSBRNA2G00121378001	chrA01:1135518-1137250	UP	PC20	OK	8.90661	1.65993	-2.42375	-2.90676	0.00065	0.0268169	yes
GSBRNA2T00142139001	BnaA03g14030D	GSBRNA2G00142139001	GSBRNA2G00142139001	chrA03:6429844-6432695	UP	PC20	OK	73.6822	13.947	-2.40136	-3.79495	5e-05	0.00315052	yes
GSBRNA2T00111182001	BnaA04g06980D	GSBRNA2G00111182001	GSBRNA2G00111182001	chrA04:5677116-5677875	UP	PC20	OK	45.0238	8.79908	-2.35526	-3.68775	5e-05	0.00315052	yes
GSBRNA2T00043838001	BnaC05g47720D	GSBRNA2G00043838001	GSBRNA2G00043838001	chrC05:42589490-42591211	UP	PC20	OK	23.7797	4.69109	-2.34174	-3.39241	5e-05	0.00315052	yes
GSBRNA2T00025271001	BnaC09g52640D	GSBRNA2G00025271001	GSBRNA2G00025271001	chrC09_random:1978214-1981133	UP	PC20	OK	7.01718	1.40849	-2.31675	-3.12415	5e-05	0.00315052	yes
GSBRNA2T00107195001	BnaA06g17510D	GSBRNA2G00107195001	GSBRNA2G00107195001	chrA06:9988583-9991859	UP	PC20	OK	8.8502	1.78134	-2.31275	-3.28607	5e-05	0.00315052	yes
GSBRNA2T00028638001	BnaA03g59850D	GSBRNA2G00028638001	GSBRNA2G00028638001	chrA03_random:3998666-3999909	UP	PC20	OK	30.9769	6.53131	-2.24575	-3.02459	0.00065	0.0268169	yes
GSBRNA2T00156932001	BnaC07g36760D	GSBRNA2G00156932001	GSBRNA2G00156932001	chrC07:38704270-38704737	UP	PC20	OK	38.4367	8.11136	-2.24447	-2.79075	0.00045	0.0198844	yes
GSBRNA2T00124475001	BnaA07g25540D	GSBRNA2G00124475001	GSBRNA2G00124475001	chrA07:18954150-18955140	UP	PC20	OK	40.3748	8.53079	-2.2427	-3.24478	5e-05	0.00315052	yes
GSBRNA2T00138275001	BnaC01g13480D	GSBRNA2G00138275001	GSBRNA2G00138275001	chrC01:8805327-8806398	UP	PC20	OK	18.6563	3.95289	-2.23868	-3.62208	5e-05	0.00315052	yes
GSBRNA2T00153674001	BnaC03g33190D	GSBRNA2G00153674001	GSBRNA2G00153674001	chrC03:20262702-20266788	UP	PC20	OK	3.92373	0.847999	-2.21009	-2.85587	0.0008	0.0311762	yes
GSBRNA2T00024144001	BnaC04g43390D	GSBRNA2G00024144001	GSBRNA2G00024144001	chrC04:43692796-43695186	UP	PC20	OK	12.3987	2.68373	-2.20788	-3.00303	0.00025	0.0123267	yes
GSBRNA2T00065297001	BnaA03g59140D	GSBRNA2G00065297001	GSBRNA2G00065297001	chrA03_random:2192474-2193317	UP	PC20	OK	286.732	62.6791	-2.19365	-3.01248	0.00085	0.0325239	yes
GSBRNA2T00121373001	BnaA01g02250D	GSBRNA2G00121373001	GSBRNA2G00121373001	chrA01:1153360-1154296	UP	PC20	OK	45.7553	10.02	-2.19105	-3.51544	5e-05	0.00315052	yes
GSBRNA2T00105441001	BnaA06g08140D	GSBRNA2G00105441001	GSBRNA2G00105441001	chrA06:4352322-4356881	UP	PC20	OK	12.7813	2.81272	-2.184	-3.30849	5e-05	0.00315052	yes
GSBRNA2T00014592001	BnaA09g52510D	GSBRNA2G00014592001	GSBRNA2G00014592001	chrA09_random:480882-484646	UP	PC20	OK	13.086	2.88876	-2.17951	-3.4707	5e-05	0.00315052	yes
GSBRNA2T00027526001	BnaA09g56100D	GSBRNA2G00027526001	GSBRNA2G00027526001	chrA09_random:3566111-3569984	UP	PC20	OK	4.41723	0.988758	-2.15945	-3.01295	5e-05	0.00315052	yes
GSBRNA2T00072498001	BnaA02g23460D	GSBRNA2G00072498001	GSBRNA2G00072498001	chrA02:16676771-16681351	UP	PC20	OK	2.34903	0.537752	-2.12706	-2.76974	0.00075	0.0297778	yes
GSBRNA2T00102563001	BnaA07g30160D	GSBRNA2G00102563001	GSBRNA2G00102563001	chrA07:21408446-21410074	UP	PC20	OK	13.6039	3.12651	-2.12139	-2.90031	0.00015	0.00807736	yes
GSBRNA2T00018975001	BnaC03g61550D	GSBRNA2G00018975001	GSBRNA2G00018975001	chrC03:50726556-50727646	UP	PC20	OK	9.08782	2.10331	-2.11128	-2.67011	0.00075	0.0297778	yes
GSBRNA2T00132252001	BnaC03g18390D	GSBRNA2G00132252001	GSBRNA2G00132252001	chrC03:9437152-9439607	UP	PC20	OK	7.81454	1.81552	-2.10578	-2.67097	0.0005	0.0215827	yes
GSBRNA2T00100324001	BnaC07g47480D	GSBRNA2G00100324001	GSBRNA2G00100324001	chrC07:44673928-44675502	UP	PC20	OK	10.2641	2.39806	-2.09767	-2.6829	0.00085	0.0325239	yes
GSBRNA2T00108220001	BnaC04g34320D	GSBRNA2G00108220001	GSBRNA2G00108220001	chrC04:35892180-35895552	UP	PC20	OK	39.9453	9.35534	-2.09417	-3.33511	5e-05	0.00315052	yes
GSBRNA2T00081872001	BnaA09g12650D	GSBRNA2G00081872001	GSBRNA2G00081872001	chrA09:6705020-6706778	UP	PC20	OK	10.4202	2.48318	-2.06912	-2.85205	0.0001	0.00574178	yes
GSBRNA2T00123517001	BnaCnng01740D	GSBRNA2G00123517001	GSBRNA2G00123517001	chrCnn_random:1819915-1821887	UP	PC20	OK	37.5949	8.99897	-2.06271	-3.45042	5e-05	0.00315052	yes
GSBRNA2T00084060001	BnaC07g03950D	GSBRNA2G00084060001	GSBRNA2G00084060001	chrC07:5328028-5332040	UP	PC20	OK	8.51333	2.04842	-2.05521	-2.89801	0.0003	0.014397	yes
GSBRNA2T00077323001	BnaC03g14470D	GSBRNA2G00077323001	GSBRNA2G00077323001	chrC03:6961709-6962488	UP	PC20	OK	42.5001	10.2422	-2.05295	-3.2403	0.0001	0.00574178	yes
GSBRNA2T00147481001	BnaA06g26560D	GSBRNA2G00147481001	GSBRNA2G00147481001	chrA06:18248866-18253970	UP	PC20	OK	24.9233	6.04147	-2.04452	-3.37977	5e-05	0.00315052	yes
GSBRNA2T00018647001	BnaC01g38800D	GSBRNA2G00018647001	GSBRNA2G00018647001	chrC01:37700123-37701047	UP	PC20	OK	22.7876	5.554	-2.03665	-2.65309	0.00145	0.0490936	yes
GSBRNA2T00148916001	BnaA03g08110D	GSBRNA2G00148916001	GSBRNA2G00148916001	chrA03:3651670-3655237	UP	PC20	OK	6.35779	1.5527	-2.03374	-2.85469	5e-05	0.00315052	yes
GSBRNA2T00062428001	BnaCnng07700D	GSBRNA2G00062428001	GSBRNA2G00062428001	chrCnn_random:7038005-7038658	UP	PC20	OK	34.5879	8.45062	-2.03314	-2.99634	0.00025	0.0123267	yes
GSBRNA2T00115842001	BnaC09g10680D	GSBRNA2G00115842001	GSBRNA2G00115842001	chrC09:7208456-7209890	UP	PC20	OK	20.9101	5.17957	-2.01329	-3.30352	5e-05	0.00315052	yes
GSBRNA2T00116415001	BnaA02g15980D	GSBRNA2G00116415001	GSBRNA2G00116415001	chrA02:9432988-9433684	UP	PC20	OK	30.3468	7.57003	-2.00317	-2.90747	0.0001	0.00574178	yes
GSBRNA2T00123302001	BnaA04g23210D	GSBRNA2G00123302001	GSBRNA2G00123302001	chrA04:17265150-17269180	UP	PC20	OK	7.14781	1.78847	-1.99877	-2.96391	5e-05	0.00315052	yes
GSBRNA2T00127132001	BnaC08g32450D	GSBRNA2G00127132001	GSBRNA2G00127132001	chrC08:31389722-31392718	UP	PC20	OK	13.6941	3.45775	-1.98565	-2.97053	5e-05	0.00315052	yes
GSBRNA2T00112341001	BnaA07g11370D	GSBRNA2G00112341001	GSBRNA2G00112341001	chrA07:10604388-10610669	UP	PC20	OK	65.5888	16.6793	-1.97539	-3.10994	5e-05	0.00315052	yes
GSBRNA2T00116014001	BnaC01g17020D	GSBRNA2G00116014001	GSBRNA2G00116014001	chrC01:11667277-11669523	UP	PC20	OK	97.0852	25.1241	-1.95018	-2.88374	0.0004	0.0180197	yes
GSBRNA2T00104767001	BnaA05g25240D	GSBRNA2G00104767001	GSBRNA2G00104767001	chrA05:18719134-18721165	UP	PC20	OK	19.0748	5.02039	-1.9258	-3.03639	0.0001	0.00574178	yes
GSBRNA2T00134544001	BnaC03g03520D	GSBRNA2G00134544001	GSBRNA2G00134544001	chrC03:1714808-1717419	UP	PC20	OK	9.12236	2.40197	-1.92519	-2.68273	0.0008	0.0311762	yes
GSBRNA2T00055421001	BnaA02g30740D	GSBRNA2G00055421001	GSBRNA2G00055421001	chrA02:22180980-22185890	UP	PC20	OK	8.36789	2.24274	-1.8996	-2.91804	0.0001	0.00574178	yes
GSBRNA2T00110925001	BnaC05g42780D	GSBRNA2G00110925001	GSBRNA2G00110925001	chrC05:39967994-39972586	UP	PC20	OK	154.657	41.7178	-1.89034	-2.45192	0.0014	0.0478684	yes
GSBRNA2T00021151001	BnaA06g02680D	GSBRNA2G00021151001	GSBRNA2G00021151001	chrA06:1612303-1615104	UP	PC20	OK	25.9907	7.01644	-1.88918	-3.09524	5e-05	0.00315052	yes
GSBRNA2T00092174001	BnaA02g28200D	GSBRNA2G00092174001	GSBRNA2G00092174001	chrA02:20787777-20788559	UP	PC20	OK	48.9085	13.3525	-1.87297	-2.89264	0.00035	0.0162035	yes
GSBRNA2T00041514001	BnaC06g26300D	GSBRNA2G00041514001	GSBRNA2G00041514001	chrC06:28027991-28029689	UP	PC20	OK	26.2672	7.18221	-1.87076	-2.77851	5e-05	0.00315052	yes
GSBRNA2T00057526001	BnaA01g32760D	GSBRNA2G00057526001	GSBRNA2G00057526001	chrA01:22129827-22133863	UP	PC20	OK	9.29422	2.55837	-1.86111	-2.76017	0.0002	0.0102143	yes
GSBRNA2T00036515001	BnaA02g18750D	GSBRNA2G00036515001	GSBRNA2G00036515001	chrA02:11537700-11538705	UP	PC20	OK	12.561	3.4691	-1.85632	-2.51321	0.0012	0.0424975	yes
GSBRNA2T00087773001	BnaCnng63480D	GSBRNA2G00087773001	GSBRNA2G00087773001	chrCnn_random:63410034-63411368	UP	PC20	OK	11.9479	3.30769	-1.85286	-2.61332	0.00075	0.0297778	yes
GSBRNA2T00143692001	BnaC06g22480D	GSBRNA2G00143692001	GSBRNA2G00143692001	chrC06:24518086-24519269	UP	PC20	OK	19.7478	5.50487	-1.84291	-2.8926	0.00025	0.0123267	yes
GSBRNA2T00102567001	BnaA07g30180D	GSBRNA2G00102567001	GSBRNA2G00102567001	chrA07:21420597-21421364	UP	PC20	OK	24.4368	6.81424	-1.84243	-2.67806	0.00045	0.0198844	yes
GSBRNA2T00150452001	BnaA10g01190D	GSBRNA2G00150452001	GSBRNA2G00150452001	chrA10:626754-631886	UP	PC20	OK	46.5255	12.9778	-1.84197	-2.74673	0.00055	0.0233056	yes
GSBRNA2T00090342001	BnaA04g11490D	GSBRNA2G00090342001	GSBRNA2G00090342001	chrA04:9939473-9942138	UP	PC20	OK	17.5883	4.93333	-1.83398	-2.94632	5e-05	0.00315052	yes
GSBRNA2T00073888001	BnaC05g46960D	GSBRNA2G00073888001	GSBRNA2G00073888001	chrC05:42202842-42205701	UP	PC20	OK	8.36256	2.34745	-1.83285	-2.86627	5e-05	0.00315052	yes
GSBRNA2T00034985001	BnaA09g26470D	GSBRNA2G00034985001	GSBRNA2G00034985001	chrA09:19652384-19654403	UP	PC20	OK	91.7916	25.8899	-1.82597	-3.14143	5e-05	0.00315052	yes
GSBRNA2T00053825001	BnaCnng07050D	GSBRNA2G00053825001	GSBRNA2G00053825001	chrCnn_random:6176478-6183374	UP	PC20	OK	7.27321	2.07018	-1.81284	-2.65475	0.00055	0.0233056	yes
GSBRNA2T00130897001	BnaC01g03410D	GSBRNA2G00130897001	GSBRNA2G00130897001	chrC01:1759947-1761661	UP	PC20	OK	51.9214	14.8703	-1.80389	-3.08737	0.0001	0.00574178	yes
GSBRNA2T00049267001	BnaA03g00800D	GSBRNA2G00049267001	GSBRNA2G00049267001	chrA03:345043-345860	UP	PC20	OK	27.021	7.82356	-1.78819	-2.80026	0.0005	0.0215827	yes
GSBRNA2T00049277001	BnaA03g00870D	GSBRNA2G00049277001	GSBRNA2G00049277001	chrA03:378519-380641	UP	PC20	OK	13.5007	3.92377	-1.78272	-2.76044	0.0001	0.00574178	yes
GSBRNA2T00098748001	BnaA07g16420D	GSBRNA2G00098748001	GSBRNA2G00098748001	chrA07:13894978-13898537	UP	PC20	OK	4.14749	1.20548	-1.78263	-2.46751	0.0014	0.0478684	yes
GSBRNA2T00016979001	BnaA05g34410D	GSBRNA2G00016979001	GSBRNA2G00016979001	chrA05_random:119224-119933	UP	PC20	OK	115.788	34.1068	-1.76335	-2.98274	0.0001	0.00574178	yes
GSBRNA2T00156056001	BnaA06g06510D	GSBRNA2G00156056001	GSBRNA2G00156056001	chrA06:3506890-3509768	UP	PC20	OK	10.2799	3.03957	-1.75789	-2.62122	0.00035	0.0162035	yes
GSBRNA2T00155140001	BnaC04g46980D	GSBRNA2G00155140001	GSBRNA2G00155140001	chrC04:46119323-46122079	UP	PC20	OK	17.6247	5.21619	-1.75653	-2.85379	0.00015	0.00807736	yes
GSBRNA2T00099688001	BnaC07g42500D	GSBRNA2G00099688001	GSBRNA2G00099688001	chrC07:41922784-41924191	UP	PC20	OK	17.1333	5.09687	-1.74912	-2.58859	0.00065	0.0268169	yes
GSBRNA2T00070630001	BnaA09g13300D	GSBRNA2G00070630001	GSBRNA2G00070630001	chrA09:7342299-7344144	UP	PC20	OK	33.2638	9.95975	-1.73977	-2.62509	0.00075	0.0297778	yes
GSBRNA2T00081637001	BnaA07g12830D	GSBRNA2G00081637001	GSBRNA2G00081637001	chrA07:11472577-11478435	UP	PC20	OK	10.5165	3.1513	-1.73864	-2.83085	0.0001	0.00574178	yes
GSBRNA2T00036507001	BnaA02g18700D	GSBRNA2G00036507001	GSBRNA2G00036507001	chrA02:11452378-11453377	UP	PC20	OK	15.829	4.76498	-1.73202	-2.49687	0.0012	0.0424975	yes
GSBRNA2T00092450001	BnaA06g39280D	GSBRNA2G00092450001	GSBRNA2G00092450001	chrA06_random:1465951-1467009	UP	PC20	OK	28.5614	8.61336	-1.72942	-2.65973	0.0004	0.0180197	yes
GSBRNA2T00106914001	BnaC09g50190D	GSBRNA2G00106914001	GSBRNA2G00106914001	chrC09:48145932-48146988	UP	PC20	OK	12.6486	3.84389	-1.71834	-2.49384	0.0012	0.0424975	yes
GSBRNA2T00053446001	BnaA01g35060D	GSBRNA2G00053446001	GSBRNA2G00053446001	chrA01_random:363569-366449	UP	PC20	OK	13.1314	3.99232	-1.71772	-2.71174	0.00025	0.0123267	yes
GSBRNA2T00084824001	BnaA02g22470D	GSBRNA2G00084824001	GSBRNA2G00084824001	chrA02:15006338-15008337	UP	PC20	OK	31.5959	9.67386	-1.70757	-2.63537	0.0001	0.00574178	yes
GSBRNA2T00066356001	BnaA05g19400D	GSBRNA2G00066356001	GSBRNA2G00066356001	chrA05:14792148-14793248	UP	PC20	OK	42.6	13.2301	-1.68703	-2.88163	5e-05	0.00315052	yes
GSBRNA2T00073527001	BnaCnng58640D	GSBRNA2G00073527001	GSBRNA2G00073527001	chrCnn_random:58382886-58386098	UP	PC20	OK	7.18606	2.23825	-1.68283	-2.48733	0.0013	0.0453439	yes
GSBRNA2T00106094001	BnaC05g39020D	GSBRNA2G00106094001	GSBRNA2G00106094001	chrC05:37582230-37592373	UP	PC20	OK	14.6777	4.58862	-1.67749	-2.83742	0.0002	0.0102143	yes
GSBRNA2T00114674001	BnaC02g08600D	GSBRNA2G00114674001	GSBRNA2G00114674001	chrC02:4790984-4792201	UP	PC20	OK	14.0801	4.40453	-1.6766	-2.47034	0.00095	0.0355101	yes
GSBRNA2T00120598001	BnaC02g39100D	GSBRNA2G00120598001	GSBRNA2G00120598001	chrC02:42115793-42118378	UP	PC20	OK	8.98508	2.81487	-1.67446	-2.63001	0.00105	0.0384482	yes
GSBRNA2T00136814001	BnaC08g37340D	GSBRNA2G00136814001	GSBRNA2G00136814001	chrC08:34189335-34190189	UP	PC20	OK	41.1561	12.9475	-1.66843	-2.43711	0.00055	0.0233056	yes
GSBRNA2T00119391001	BnaC05g18500D	GSBRNA2G00119391001	GSBRNA2G00119391001	chrC05:12230899-12233256	UP	PC20	OK	8.21191	2.59883	-1.65986	-2.55322	0.00065	0.0268169	yes
GSBRNA2T00033361001	BnaC09g32640D	GSBRNA2G00033361001	GSBRNA2G00033361001	chrC09:35796726-35798212	UP	PC20	OK	25.106	7.94992	-1.65902	-2.87907	0.0001	0.00574178	yes
GSBRNA2T00034147001	BnaCnng38150D	GSBRNA2G00034147001	GSBRNA2G00034147001	chrCnn_random:36708762-36709998	UP	PC20	OK	82.5364	26.3683	-1.64622	-2.82622	5e-05	0.00315052	yes
GSBRNA2T00153733001	BnaC03g33650D	GSBRNA2G00153733001	GSBRNA2G00153733001	chrC03:20497290-20501091	UP	PC20	OK	19.5068	6.27593	-1.63607	-2.76868	0.0003	0.014397	yes
GSBRNA2T00100055001	BnaC07g45430D	GSBRNA2G00100055001	GSBRNA2G00100055001	chrC07:43513132-43516657	UP	PC20	OK	80.7761	25.9892	-1.63602	-2.56613	0.0006	0.0251389	yes
GSBRNA2T00129470001	BnaA09g33600D	GSBRNA2G00129470001	GSBRNA2G00129470001	chrA09:24759456-24761438	UP	PC20	OK	22.7097	7.37243	-1.6231	-2.8169	0.0002	0.0102143	yes
GSBRNA2T00094461001	BnaA09g20070D	GSBRNA2G00094461001	GSBRNA2G00094461001	chrA09:13041542-13043724	UP	PC20	OK	7.25694	2.3578	-1.62192	-2.48982	0.0011	0.0398877	yes
GSBRNA2T00075217001	BnaA03g53460D	GSBRNA2G00075217001	GSBRNA2G00075217001	chrA03:28047516-28048767	UP	PC20	OK	26.5971	8.69248	-1.61343	-2.71688	0.0004	0.0180197	yes
GSBRNA2T00129696001	BnaA03g02510D	GSBRNA2G00129696001	GSBRNA2G00129696001	chrA03:1131319-1133741	UP	PC20	OK	23.7413	7.77252	-1.61095	-2.53051	0.00045	0.0198844	yes
GSBRNA2T00093856001	BnaC06g04530D	GSBRNA2G00093856001	GSBRNA2G00093856001	chrC06:5185273-5185794	UP	PC20	OK	38.7541	12.7006	-1.60945	-2.34106	0.00115	0.0413608	yes
GSBRNA2T00061090001	BnaC03g60270D	GSBRNA2G00061090001	GSBRNA2G00061090001	chrC03:49433600-49435518	UP	PC20	OK	19.1127	6.2872	-1.60404	-2.48198	0.00105	0.0384482	yes
GSBRNA2T00127322001	BnaC08g34050D	GSBRNA2G00127322001	GSBRNA2G00127322001	chrC08:32282738-32285617	UP	PC20	OK	10.434	3.4457	-1.59842	-2.30098	0.0013	0.0453439	yes
GSBRNA2T00150940001	BnaA08g16370D	GSBRNA2G00150940001	GSBRNA2G00150940001	chrA08:13358614-13365881	UP	PC20	OK	21.7209	7.17901	-1.59723	-2.73914	0.0002	0.0102143	yes
GSBRNA2T00101902001	BnaC05g36540D	GSBRNA2G00101902001	GSBRNA2G00101902001	chrC05:35815166-35816653	UP	PC20	OK	43.9783	14.6608	-1.58483	-2.79735	0.0002	0.0102143	yes
GSBRNA2T00067672001	BnaAnng25560D	GSBRNA2G00067672001	GSBRNA2G00067672001	chrAnn_random:29605147-29607181	UP	PC20	OK	9.39862	3.13464	-1.58415	-2.42004	0.0011	0.0398877	yes
GSBRNA2T00002874001	BnaC09g30560D	GSBRNA2G00002874001	GSBRNA2G00002874001	chrC09:33549819-33554104	UP	PC20	OK	29.3584	9.86766	-1.57299	-2.55214	0.0007	0.0284206	yes
GSBRNA2T00147102001	BnaC06g09380D	GSBRNA2G00147102001	GSBRNA2G00147102001	chrC06:11302708-11303719	UP	PC20	OK	172.045	58.1102	-1.56592	-2.69047	0.0001	0.00574178	yes
GSBRNA2T00073550001	BnaAnng27090D	GSBRNA2G00073550001	GSBRNA2G00073550001	chrAnn_random:31013163-31013767	UP	PC20	OK	43.5606	14.7398	-1.56331	-2.43586	0.00125	0.0440112	yes
GSBRNA2T00036384001	BnaA03g58390D	GSBRNA2G00036384001	GSBRNA2G00036384001	chrA03_random:1661186-1665337	UP	PC20	OK	19.9686	6.79976	-1.55418	-2.57326	0.0005	0.0215827	yes
GSBRNA2T00022692001	BnaC09g52180D	GSBRNA2G00022692001	GSBRNA2G00022692001	chrC09_random:1456185-1456512	UP	PC20	OK	474.392	161.875	-1.5512	-2.65075	0.0002	0.0102143	yes
GSBRNA2T00121096001	BnaA01g04640D	GSBRNA2G00121096001	GSBRNA2G00121096001	chrA01:2162637-2165507	UP	PC20	OK	22.8343	7.81742	-1.54644	-2.7158	0.0005	0.0215827	yes
GSBRNA2T00142946001	BnaC07g26010D	GSBRNA2G00142946001	GSBRNA2G00142946001	chrC07:32070270-32072697	UP	PC20	OK	9.98037	3.42821	-1.54164	-2.47351	0.00075	0.0297778	yes
GSBRNA2T00000439001	BnaC04g19370D	GSBRNA2G00000439001	GSBRNA2G00000439001	chrC04:19972793-19974051	UP	PC20	OK	41.8731	14.3961	-1.54035	-2.73666	0.0001	0.00574178	yes
GSBRNA2T00048498001	BnaA05g12280D	GSBRNA2G00048498001	GSBRNA2G00048498001	chrA05:7084229-7085964	UP	PC20	OK	107.128	36.9934	-1.53399	-2.58082	0.0008	0.0311762	yes
GSBRNA2T00146091001	BnaC09g04840D	GSBRNA2G00146091001	GSBRNA2G00146091001	chrC09:2798442-2799450	UP	PC20	OK	74.959	25.9013	-1.53308	-2.46295	0.00015	0.00807736	yes
GSBRNA2T00001133001	BnaC01g30750D	GSBRNA2G00001133001	GSBRNA2G00001133001	chrC01:29225672-29226558	UP	PC20	OK	22.5582	7.87123	-1.51899	-2.39483	0.00105	0.0384482	yes
GSBRNA2T00093777001	BnaA02g28980D	GSBRNA2G00093777001	GSBRNA2G00093777001	chrA02:21247052-21248778	UP	PC20	OK	40.3272	14.1303	-1.51297	-2.55989	0.00055	0.0233056	yes
GSBRNA2T00081778001	BnaA03g52940D	GSBRNA2G00081778001	GSBRNA2G00081778001	chrA03:27658342-27665800	UP	PC20	OK	10.7279	3.76095	-1.5122	-2.53422	0.00035	0.0162035	yes
GSBRNA2T00070967001	BnaA09g16990D	GSBRNA2G00070967001	GSBRNA2G00070967001	chrA09:10258600-10264456	UP	PC20	OK	24.6417	8.67627	-1.50595	-2.63281	0.00035	0.0162035	yes
GSBRNA2T00049848001	BnaC06g12920D	GSBRNA2G00049848001	GSBRNA2G00049848001	chrC06:15605710-15608767	UP	PC20	OK	9.23797	3.27592	-1.49567	-2.44769	0.00115	0.0413608	yes
GSBRNA2T00125471001	BnaA06g15550D	GSBRNA2G00125471001	GSBRNA2G00125471001	chrA06:8517993-8519239	UP	PC20	OK	65.9659	23.5197	-1.48785	-2.67402	0.00075	0.0297778	yes
GSBRNA2T00029705001	BnaCnng36390D	GSBRNA2G00029705001	GSBRNA2G00029705001	chrCnn_random:34862793-34863803	UP	PC20	OK	25.6396	9.17055	-1.48329	-2.50605	0.00095	0.0355101	yes
GSBRNA2T00116439001	BnaA02g15820D	GSBRNA2G00116439001	GSBRNA2G00116439001	chrA02:9256426-9258660	UP	PC20	OK	12.4695	4.47223	-1.47933	-2.44424	0.0004	0.0180197	yes
GSBRNA2T00055555001	BnaA01g35070D	GSBRNA2G00055555001	GSBRNA2G00055555001	chrA01_random:381248-385878	UP	PC20	OK	22.9588	8.23499	-1.47921	-2.48922	0.00035	0.0162035	yes
GSBRNA2T00097453001	BnaAnng10720D	GSBRNA2G00097453001	GSBRNA2G00097453001	chrAnn_random:11535724-11538895	UP	PC20	OK	10.2478	3.68861	-1.47416	-2.5072	0.00085	0.0325239	yes
GSBRNA2T00137306001	BnaA03g36080D	GSBRNA2G00137306001	GSBRNA2G00137306001	chrA03:17633981-17637490	UP	PC20	OK	27.1277	9.76744	-1.47372	-2.5946	0.0002	0.0102143	yes
GSBRNA2T00034021001	BnaCnng38030D	GSBRNA2G00034021001	GSBRNA2G00034021001	chrCnn_random:36547113-36550068	UP	PC20	OK	8.76918	3.16106	-1.47204	-2.4257	0.00135	0.0467852	yes
GSBRNA2T00074142001	BnaCnng58860D	GSBRNA2G00074142001	GSBRNA2G00074142001	chrCnn_random:58538195-58540345	UP	PC20	OK	58.9451	21.3294	-1.46653	-2.5035	0.0009	0.034061	yes
GSBRNA2T00009527001	BnaA09g04320D	GSBRNA2G00009527001	GSBRNA2G00009527001	chrA09:2126785-2128337	UP	PC20	OK	26.8001	9.69972	-1.46622	-2.40067	0.00105	0.0384482	yes
GSBRNA2T00075985001	BnaCnng59680D	GSBRNA2G00075985001	GSBRNA2G00075985001	chrCnn_random:59438487-59442463	UP	PC20	OK	5.83378	2.1161	-1.46302	-2.33489	0.0013	0.0453439	yes
GSBRNA2T00000396001	BnaA05g28390D	GSBRNA2G00000396001	GSBRNA2G00000396001	chrA05:20169390-20172100	UP	PC20	OK	16.8726	6.13049	-1.4606	-2.46694	0.0007	0.0284206	yes
GSBRNA2T00123513001	BnaCnng01720D	GSBRNA2G00123513001	GSBRNA2G00123513001	chrCnn_random:1772445-1777817	UP	PC20	OK	11.3171	4.12339	-1.45661	-2.43601	0.00075	0.0297778	yes
GSBRNA2T00012779001	BnaC08g14510D	GSBRNA2G00012779001	GSBRNA2G00012779001	chrC08:19262328-19264900	UP	PC20	OK	21.8164	8.01384	-1.44485	-2.49933	0.00055	0.0233056	yes
GSBRNA2T00087557001	BnaAnng08970D	GSBRNA2G00087557001	GSBRNA2G00087557001	chrAnn_random:9548820-9549645	UP	PC20	OK	116.782	42.9322	-1.44368	-2.49494	0.0002	0.0102143	yes
GSBRNA2T00015812001	BnaA09g30050D	GSBRNA2G00015812001	GSBRNA2G00015812001	chrA09:22386310-22388574	UP	PC20	OK	10.9677	4.05607	-1.43511	-2.30303	0.0012	0.0424975	yes
GSBRNA2T00050427001	BnaA04g17070D	GSBRNA2G00050427001	GSBRNA2G00050427001	chrA04:13912872-13917491	UP	PC20	OK	62.3948	23.0872	-1.43433	-2.39661	0.00135	0.0467852	yes
GSBRNA2T00036396001	BnaCnng40440D	GSBRNA2G00036396001	GSBRNA2G00036396001	chrCnn_random:38992775-38993300	UP	PC20	OK	56.1954	20.8916	-1.42753	-2.34642	0.001	0.0370366	yes
GSBRNA2T00078929001	BnaA10g07360D	GSBRNA2G00078929001	GSBRNA2G00078929001	chrA10:5778527-5784681	UP	PC20	OK	6.26791	2.33109	-1.42698	-2.44944	0.00085	0.0325239	yes
GSBRNA2T00008339001	BnaC04g00090D	GSBRNA2G00008339001	GSBRNA2G00008339001	chrC04:31311-31998	UP	PC20	OK	80.701	30.1382	-1.42099	-2.51653	0.00035	0.0162035	yes
GSBRNA2T00015114001	BnaA08g25590D	GSBRNA2G00015114001	GSBRNA2G00015114001	chrA08:17570282-17572839	UP	PC20	OK	11.0681	4.16476	-1.4101	-2.27942	0.001	0.0370366	yes
GSBRNA2T00027221001	BnaA08g15350D	GSBRNA2G00027221001	GSBRNA2G00027221001	chrA08:12787481-12789510	UP	PC20	OK	41.9355	15.8561	-1.40313	-2.46134	0.0009	0.034061	yes
GSBRNA2T00126410001	BnaA04g03900D	GSBRNA2G00126410001	GSBRNA2G00126410001	chrA04:2757930-2760248	UP	PC20	OK	17.1253	6.49524	-1.39868	-2.36794	0.0008	0.0311762	yes
GSBRNA2T00043485001	BnaA04g17220D	GSBRNA2G00043485001	GSBRNA2G00043485001	chrA04:14031031-14033477	UP	PC20	OK	33.3905	12.6998	-1.39463	-2.46777	0.0011	0.0398877	yes
GSBRNA2T00150807001	BnaA08g17420D	GSBRNA2G00150807001	GSBRNA2G00150807001	chrA08:13878513-13880120	UP	PC20	OK	16.0896	6.17854	-1.38079	-2.28759	0.0014	0.0478684	yes
GSBRNA2T00100569001	BnaC05g06220D	GSBRNA2G00100569001	GSBRNA2G00100569001	chrC05:3057621-3059236	UP	PC20	OK	23.1029	8.95603	-1.36714	-2.35195	0.0012	0.0424975	yes
GSBRNA2T00027985001	BnaA02g37020D	GSBRNA2G00027985001	GSBRNA2G00027985001	chrA02_random:1541701-1547395	UP	PC20	OK	19.5244	7.58404	-1.36424	-2.41882	0.00075	0.0297778	yes
GSBRNA2T00032880001	BnaA04g12980D	GSBRNA2G00032880001	GSBRNA2G00032880001	chrA04:10937416-10948679	UP	PC20	OK	5.42998	2.12182	-1.35565	-2.42822	0.00065	0.0268169	yes
GSBRNA2T00094460001	BnaA09g20060D	GSBRNA2G00094460001	GSBRNA2G00094460001	chrA09:13034824-13039431	UP	PC20	OK	9.11967	3.57142	-1.35248	-2.32543	0.0009	0.034061	yes
GSBRNA2T00040218001	BnaA05g18490D	GSBRNA2G00040218001	GSBRNA2G00040218001	chrA05:13847409-13850934	UP	PC20	OK	12.6227	4.95301	-1.34964	-2.3475	0.00115	0.0413608	yes
GSBRNA2T00028379001	BnaC01g42990D	GSBRNA2G00028379001	GSBRNA2G00028379001	chrC01_random:2306274-2309997	UP	PC20	OK	16.8528	6.70756	-1.32913	-2.29663	0.001	0.0370366	yes
GSBRNA2T00033288001	BnaA05g14440D	GSBRNA2G00033288001	GSBRNA2G00033288001	chrA05:8909360-8915806	UP	PC20	OK	8.23734	3.30902	-1.31577	-2.32995	0.00115	0.0413608	yes
GSBRNA2T00015665001	BnaC03g30070D	GSBRNA2G00015665001	GSBRNA2G00015665001	chrC03:18189495-18190738	UP	PC20	OK	21.5726	51.7841	1.26331	2.25142	0.00145	0.0490936	yes
GSBRNA2T00025864001	BnaA06g40080D	GSBRNA2G00025864001	GSBRNA2G00025864001	chrA06_random:1870879-1872103	UP	PC20	OK	25.502	62.3744	1.29034	2.21999	0.00145	0.0490936	yes
GSBRNA2T00065074001	BnaCnng08770D	GSBRNA2G00065074001	GSBRNA2G00065074001	chrCnn_random:8150521-8153228	UP	PC20	OK	13.4955	33.3413	1.30483	2.2313	0.0008	0.0311762	yes
GSBRNA2T00001812001	BnaA06g34240D	GSBRNA2G00001812001	GSBRNA2G00001812001	chrA06:22636903-22638029	UP	PC20	OK	14.5239	36.6056	1.33364	2.35651	0.00105	0.0384482	yes
GSBRNA2T00022316001	BnaA05g33490D	GSBRNA2G00022316001	GSBRNA2G00022316001	chrA05:22673064-22676351	UP	PC20	OK	17.9654	45.7102	1.34729	2.34636	0.00115	0.0413608	yes
GSBRNA2T00144134001	BnaC03g56160D	GSBRNA2G00144134001	GSBRNA2G00144134001	chrC03:45417699-45419695	UP	PC20	OK	31.7855	80.8856	1.34752	2.29236	0.00145	0.0490936	yes
GSBRNA2T00047914001	BnaA10g12840D	GSBRNA2G00047914001	GSBRNA2G00047914001	chrA10:10454277-10455058	UP	PC20	OK	30.3558	77.8079	1.35795	2.39854	0.00085	0.0325239	yes
GSBRNA2T00154891001	BnaA03g37260D	GSBRNA2G00154891001	GSBRNA2G00154891001	chrA03:18437241-18439520	UP	PC20	OK	7.2307	18.565	1.36038	2.4247	0.0012	0.0424975	yes
GSBRNA2T00039905001	BnaA01g06610D	GSBRNA2G00039905001	GSBRNA2G00039905001	chrA01:3072465-3073755	UP	PC20	OK	15.1172	38.8314	1.36103	2.30638	0.00135	0.0467852	yes
GSBRNA2T00125430001	BnaA06g15870D	GSBRNA2G00125430001	GSBRNA2G00125430001	chrA06:8703860-8706094	UP	PC20	OK	16.2785	42.0162	1.36798	2.38228	0.00135	0.0467852	yes
GSBRNA2T00131394001	BnaA01g09740D	GSBRNA2G00131394001	GSBRNA2G00131394001	chrA01:4791577-4794321	UP	PC20	OK	19.3483	50.1881	1.37514	2.33995	0.0008	0.0311762	yes
GSBRNA2T00139673001	BnaC08g17460D	GSBRNA2G00139673001	GSBRNA2G00139673001	chrC08:21083998-21084778	UP	PC20	OK	15.7207	40.8511	1.37771	2.24602	0.00105	0.0384482	yes
GSBRNA2T00123561001	BnaCnng02170D	GSBRNA2G00123561001	GSBRNA2G00123561001	chrCnn_random:2001542-2004828	UP	PC20	OK	8.32108	21.7643	1.38712	2.35118	0.0013	0.0453439	yes
GSBRNA2T00076298001	BnaC05g48570D	GSBRNA2G00076298001	GSBRNA2G00076298001	chrC05:43003795-43006637	UP	PC20	OK	5.32516	13.9863	1.39312	2.3211	0.0011	0.0398877	yes
GSBRNA2T00104813001	BnaA05g24830D	GSBRNA2G00104813001	GSBRNA2G00104813001	chrA05:18502207-18504741	UP	PC20	OK	4.7335	12.4693	1.3974	2.36605	0.00135	0.0467852	yes
GSBRNA2T00132209001	BnaC03g18040D	GSBRNA2G00132209001	GSBRNA2G00132209001	chrC03:9240264-9241232	UP	PC20	OK	11.2879	29.7867	1.39989	2.45987	0.00105	0.0384482	yes
GSBRNA2T00006228001	BnaC01g20780D	GSBRNA2G00006228001	GSBRNA2G00006228001	chrC01:14510075-14511913	UP	PC20	OK	12.9394	34.1693	1.40093	2.4727	0.0008	0.0311762	yes
GSBRNA2T00148784001	BnaA03g09170D	GSBRNA2G00148784001	GSBRNA2G00148784001	chrA03:4129191-4129924	UP	PC20	OK	26.4824	70.1091	1.40457	2.49475	0.00085	0.0325239	yes
GSBRNA2T00121111001	BnaA01g04520D	GSBRNA2G00121111001	GSBRNA2G00121111001	chrA01:2107640-2114667	UP	PC20	OK	4.5595	12.1311	1.41177	2.34271	0.0011	0.0398877	yes
GSBRNA2T00146657001	BnaA07g32220D	GSBRNA2G00146657001	GSBRNA2G00146657001	chrA07:22364908-22367785	UP	PC20	OK	13.9177	37.0594	1.41292	2.4483	0.00095	0.0355101	yes
GSBRNA2T00079623001	BnaA09g30920D	GSBRNA2G00079623001	GSBRNA2G00079623001	chrA09:23032871-23034105	UP	PC20	OK	17.8452	47.6321	1.4164	2.42907	0.00135	0.0467852	yes
GSBRNA2T00138941001	BnaA03g21310D	GSBRNA2G00138941001	GSBRNA2G00138941001	chrA03:10118687-10120831	UP	PC20	OK	10.4564	27.9443	1.41818	2.33072	0.0012	0.0424975	yes
GSBRNA2T00143397001	BnaA02g01510D	GSBRNA2G00143397001	GSBRNA2G00143397001	chrA02:693413-695117	UP	PC20	OK	22.3516	59.7904	1.41954	2.48433	0.0005	0.0215827	yes
GSBRNA2T00117390001	BnaC07g11270D	GSBRNA2G00117390001	GSBRNA2G00117390001	chrC07:16942829-16945848	UP	PC20	OK	5.98171	16.0068	1.42006	2.44811	0.00065	0.0268169	yes
GSBRNA2T00126233001	BnaA04g02760D	GSBRNA2G00126233001	GSBRNA2G00126233001	chrA04:1845853-1847433	UP	PC20	OK	40.1072	107.617	1.42397	2.39349	0.0007	0.0284206	yes
GSBRNA2T00136263001	BnaA10g25000D	GSBRNA2G00136263001	GSBRNA2G00136263001	chrA10:16202092-16203647	UP	PC20	OK	5.95304	16.0023	1.42658	2.45165	0.001	0.0370366	yes
GSBRNA2T00011183001	BnaCnng71320D	GSBRNA2G00011183001	GSBRNA2G00011183001	chrCnn_random:71488765-71489530	UP	PC20	OK	127.018	343.455	1.43509	2.34423	0.0009	0.034061	yes
GSBRNA2T00037967001	BnaCnng41520D	GSBRNA2G00037967001	GSBRNA2G00037967001	chrCnn_random:40335996-40336725	UP	PC20	OK	65.6317	177.637	1.43647	2.31939	0.0006	0.0251389	yes
GSBRNA2T00108256001	BnaC04g34480D	GSBRNA2G00108256001	GSBRNA2G00108256001	chrC04:36074991-36075468	UP	PC20	OK	136.385	369.961	1.43969	2.38483	0.0006	0.0251389	yes
GSBRNA2T00095097001	BnaC06g00180D	GSBRNA2G00095097001	GSBRNA2G00095097001	chrC06:279020-281085	UP	PC20	OK	8.52558	23.1704	1.44241	2.45373	0.0006	0.0251389	yes
GSBRNA2T00144176001	BnaC03g56410D	GSBRNA2G00144176001	GSBRNA2G00144176001	chrC03:45704065-45706175	UP	PC20	OK	6.27823	17.0692	1.44296	2.49252	0.0008	0.0311762	yes
GSBRNA2T00136073001	BnaA10g23320D	GSBRNA2G00136073001	GSBRNA2G00136073001	chrA10:15433841-15435720	UP	PC20	OK	9.03424	24.6273	1.44678	2.42485	0.00075	0.0297778	yes
GSBRNA2T00107711001	BnaC01g11610D	GSBRNA2G00107711001	GSBRNA2G00107711001	chrC01:7269389-7270910	UP	PC20	OK	16.4864	45.0072	1.44888	2.52086	0.0007	0.0284206	yes
GSBRNA2T00091667001	BnaA02g30210D	GSBRNA2G00091667001	GSBRNA2G00091667001	chrA02:21892059-21892443	UP	PC20	OK	53.0381	145.799	1.45888	2.58308	0.0007	0.0284206	yes
GSBRNA2T00130425001	BnaC01g07220D	GSBRNA2G00130425001	GSBRNA2G00130425001	chrC01:3747123-3749622	UP	PC20	OK	5.13881	14.1626	1.46258	2.2343	0.0014	0.0478684	yes
GSBRNA2T00042255001	BnaC01g19520D	GSBRNA2G00042255001	GSBRNA2G00042255001	chrC01:13501793-13503644	UP	PC20	OK	13.4033	36.9903	1.46456	2.4213	0.00055	0.0233056	yes
GSBRNA2T00083867001	BnaAnng29590D	GSBRNA2G00083867001	GSBRNA2G00083867001	chrAnn_random:33798587-33800320	UP	PC20	OK	7.61053	21.163	1.47547	2.41841	0.00135	0.0467852	yes
GSBRNA2T00047142001	BnaA08g26170D	GSBRNA2G00047142001	GSBRNA2G00047142001	chrA08:17805468-17806975	UP	PC20	OK	7.00539	19.5611	1.48145	2.52078	0.00085	0.0325239	yes
GSBRNA2T00121446001	BnaA01g01570D	GSBRNA2G00121446001	GSBRNA2G00121446001	chrA01:843495-845460	UP	PC20	OK	27.2855	76.2831	1.48323	2.47374	0.00025	0.0123267	yes
GSBRNA2T00130760001	BnaC01g04460D	GSBRNA2G00130760001	GSBRNA2G00130760001	chrC01:2355371-2361388	UP	PC20	OK	24.2764	67.9382	1.48467	2.40369	0.0007	0.0284206	yes
GSBRNA2T00093306001	BnaA10g12720D	GSBRNA2G00093306001	GSBRNA2G00093306001	chrA10:10384807-10386850	UP	PC20	OK	15.8156	44.3246	1.48676	2.40044	0.00075	0.0297778	yes
GSBRNA2T00127608001	BnaC04g38330D	GSBRNA2G00127608001	GSBRNA2G00127608001	chrC04:39538094-39540762	UP	PC20	OK	3.61714	10.146	1.48799	2.40182	0.00065	0.0268169	yes
GSBRNA2T00057073001	BnaC08g41800D	GSBRNA2G00057073001	GSBRNA2G00057073001	chrC08:36237022-36237743	UP	PC20	OK	55.9239	156.933	1.48861	2.49828	0.00065	0.0268169	yes
GSBRNA2T00036788001	BnaC06g12160D	GSBRNA2G00036788001	GSBRNA2G00036788001	chrC06:14492749-14497614	UP	PC20	OK	5.63614	15.8307	1.48995	2.52306	0.00075	0.0297778	yes
GSBRNA2T00027241001	BnaA08g15200D	GSBRNA2G00027241001	GSBRNA2G00027241001	chrA08:12713114-12715750	UP	PC20	OK	5.53311	15.558	1.4915	2.5265	0.0007	0.0284206	yes
GSBRNA2T00084513001	BnaC05g19630D	GSBRNA2G00084513001	GSBRNA2G00084513001	chrC05:13111051-13115612	UP	PC20	OK	16.8242	47.328	1.49216	2.53171	0.00045	0.0198844	yes
GSBRNA2T00078007001	BnaA06g33260D	GSBRNA2G00078007001	GSBRNA2G00078007001	chrA06:22006164-22008436	UP	PC20	OK	12.8561	36.3201	1.49831	2.61894	0.0003	0.014397	yes
GSBRNA2T00109344001	BnaC08g22640D	GSBRNA2G00109344001	GSBRNA2G00109344001	chrC08:25256650-25258376	UP	PC20	OK	22.656	64.0848	1.50009	2.4032	0.00105	0.0384482	yes
GSBRNA2T00105134001	BnaC04g41140D	GSBRNA2G00105134001	GSBRNA2G00105134001	chrC04:41925610-41927968	UP	PC20	OK	15.2722	43.2168	1.50069	2.64852	0.0002	0.0102143	yes
GSBRNA2T00028767001	BnaC03g22030D	GSBRNA2G00028767001	GSBRNA2G00028767001	chrC03:12056373-12059169	UP	PC20	OK	7.47541	21.2099	1.50452	2.67327	0.00025	0.0123267	yes
GSBRNA2T00127441001	BnaC08g35020D	GSBRNA2G00127441001	GSBRNA2G00127441001	chrC08:33049370-33050670	UP	PC20	OK	31.6633	89.9769	1.50674	2.33981	0.00125	0.0440112	yes
GSBRNA2T00010581001	BnaA09g52790D	GSBRNA2G00010581001	GSBRNA2G00010581001	chrA09_random:639156-641875	UP	PC20	OK	8.96432	25.5331	1.5101	2.63078	0.0005	0.0215827	yes
GSBRNA2T00076628001	BnaC07g14830D	GSBRNA2G00076628001	GSBRNA2G00076628001	chrC07:20753503-20754587	UP	PC20	OK	12.9751	37.032	1.51303	2.29885	0.0008	0.0311762	yes
GSBRNA2T00068790001	BnaA09g15090D	GSBRNA2G00068790001	GSBRNA2G00068790001	chrA09:8762531-8764022	UP	PC20	OK	22.9776	66.0213	1.52271	2.50148	0.00055	0.0233056	yes
GSBRNA2T00083500001	BnaCnng62150D	GSBRNA2G00083500001	GSBRNA2G00083500001	chrCnn_random:61929553-61929996	UP	PC20	OK	38.4001	110.563	1.52569	2.5941	0.0008	0.0311762	yes
GSBRNA2T00107138001	BnaC09g48200D	GSBRNA2G00107138001	GSBRNA2G00107138001	chrC09:47146074-47148435	UP	PC20	OK	13.7364	39.677	1.5303	2.73119	0.0003	0.014397	yes
GSBRNA2T00033068001	BnaC03g69560D	GSBRNA2G00033068001	GSBRNA2G00033068001	chrC03:59391824-59394400	UP	PC20	OK	16.8948	48.8268	1.53109	2.56047	0.00025	0.0123267	yes
GSBRNA2T00047897001	BnaA10g12960D	GSBRNA2G00047897001	GSBRNA2G00047897001	chrA10:10544363-10547372	UP	PC20	OK	8.8049	25.5945	1.53946	2.58424	0.00085	0.0325239	yes
GSBRNA2T00058175001	BnaA01g07750D	GSBRNA2G00058175001	GSBRNA2G00058175001	chrA01:3676984-3685534	UP	PC20	OK	8.16141	23.9199	1.55132	2.49764	0.00065	0.0268169	yes
GSBRNA2T00039891001	BnaA01g06730D	GSBRNA2G00039891001	GSBRNA2G00039891001	chrA01:3123722-3124923	UP	PC20	OK	19.8057	58.0819	1.55217	2.58021	0.0005	0.0215827	yes
GSBRNA2T00071356001	BnaC06g14100D	GSBRNA2G00071356001	GSBRNA2G00071356001	chrC06:16927423-16928779	UP	PC20	OK	10.5808	31.1284	1.55678	2.58164	0.00045	0.0198844	yes
GSBRNA2T00146817001	BnaC02g32000D	GSBRNA2G00146817001	GSBRNA2G00146817001	chrC02:34417373-34420090	UP	PC20	OK	10.6569	31.3688	1.55754	2.31209	0.0014	0.0478684	yes
GSBRNA2T00019073001	BnaC03g23130D	GSBRNA2G00019073001	GSBRNA2G00019073001	chrC03:12822611-12823525	UP	PC20	OK	17.7263	52.2977	1.56085	2.70193	0.00025	0.0123267	yes
GSBRNA2T00140456001	BnaC03g06960D	GSBRNA2G00140456001	GSBRNA2G00140456001	chrC03:3315513-3318860	UP	PC20	OK	6.19903	18.324	1.56362	2.50861	0.00075	0.0297778	yes
GSBRNA2T00069369001	BnaA09g35010D	GSBRNA2G00069369001	GSBRNA2G00069369001	chrA09:25573570-25575595	UP	PC20	OK	5.99547	17.7249	1.56383	2.49618	0.00035	0.0162035	yes
GSBRNA2T00022399001	BnaAnng14710D	GSBRNA2G00022399001	GSBRNA2G00022399001	chrAnn_random:15775907-15777000	UP	PC20	OK	15.5832	46.2717	1.57014	2.42109	0.00055	0.0233056	yes
GSBRNA2T00105478001	BnaA06g08460D	GSBRNA2G00105478001	GSBRNA2G00105478001	chrA06:4591079-4593132	UP	PC20	OK	10.3875	30.861	1.57094	2.57335	0.0002	0.0102143	yes
GSBRNA2T00046896001	BnaC04g56100D	GSBRNA2G00046896001	GSBRNA2G00046896001	chrC04_random:3768176-3771920	UP	PC20	OK	2.36457	7.09887	1.58601	2.36525	0.00095	0.0355101	yes
GSBRNA2T00138115001	BnaC01g12370D	GSBRNA2G00138115001	GSBRNA2G00138115001	chrC01:7840626-7842121	UP	PC20	OK	8.05013	24.1763	1.58651	2.70918	0.0001	0.00574178	yes
GSBRNA2T00114627001	BnaA04g07520D	GSBRNA2G00114627001	GSBRNA2G00114627001	chrA04:6452344-6454934	UP	PC20	OK	27.4442	82.5483	1.58874	2.59656	0.0003	0.014397	yes
GSBRNA2T00123961001	BnaC03g40170D	GSBRNA2G00123961001	GSBRNA2G00123961001	chrC03:25175370-25176807	UP	PC20	OK	12.5419	38.0187	1.59995	2.59911	0.0007	0.0284206	yes
GSBRNA2T00060780001	BnaC03g13600D	GSBRNA2G00060780001	GSBRNA2G00060780001	chrC03:6568308-6573493	UP	PC20	OK	3.60831	10.9984	1.6079	2.60878	0.0002	0.0102143	yes
GSBRNA2T00049647001	BnaC06g31880D	GSBRNA2G00049647001	GSBRNA2G00049647001	chrC06:32266135-32268279	UP	PC20	OK	11.1082	33.8704	1.6084	2.84132	5e-05	0.00315052	yes
GSBRNA2T00120429001	BnaA02g31900D	GSBRNA2G00120429001	GSBRNA2G00120429001	chrA02:23001727-23004056	UP	PC20	OK	19.4158	59.2051	1.60849	2.64664	0.0006	0.0251389	yes
GSBRNA2T00136092001	BnaA10g23500D	GSBRNA2G00136092001	GSBRNA2G00136092001	chrA10:15521446-15523745	UP	PC20	OK	21.9187	67.1925	1.61614	2.73292	5e-05	0.00315052	yes
GSBRNA2T00078192001	BnaA09g42610D	GSBRNA2G00078192001	GSBRNA2G00078192001	chrA09:29661130-29661809	UP	PC20	OK	30.0847	92.2949	1.61722	2.94814	0.0001	0.00574178	yes
GSBRNA2T00025217001	BnaCnng76190D	GSBRNA2G00025217001	GSBRNA2G00025217001	chrCnn_random:77279419-77279904	UP	PC20	OK	21.3359	65.4978	1.61816	2.7601	0.0005	0.0215827	yes
GSBRNA2T00094903001	BnaC09g40960D	GSBRNA2G00094903001	GSBRNA2G00094903001	chrC09:43175641-43180476	UP	PC20	OK	3.9192	12.0348	1.61857	2.72847	0.0003	0.014397	yes
GSBRNA2T00152544001	BnaC02g27050D	GSBRNA2G00152544001	GSBRNA2G00152544001	chrC02:25001443-25004211	UP	PC20	OK	16.7969	51.8676	1.62663	2.80363	0.0001	0.00574178	yes
GSBRNA2T00028505001	BnaC03g72320D	GSBRNA2G00028505001	GSBRNA2G00028505001	chrC03_random:650556-651249	UP	PC20	OK	37.4782	115.735	1.6267	2.61195	0.0005	0.0215827	yes
GSBRNA2T00156098001	BnaA06g06160D	GSBRNA2G00156098001	GSBRNA2G00156098001	chrA06:3364736-3365881	UP	PC20	OK	19.5904	60.7229	1.63209	2.63611	0.00025	0.0123267	yes
GSBRNA2T00015250001	BnaA08g24480D	GSBRNA2G00015250001	GSBRNA2G00015250001	chrA08:17109532-17110906	UP	PC20	OK	13.1176	41.223	1.65194	2.77957	0.0001	0.00574178	yes
GSBRNA2T00102408001	BnaA07g28840D	GSBRNA2G00102408001	GSBRNA2G00102408001	chrA07:20782781-20784865	UP	PC20	OK	11.179	35.1343	1.65209	2.91388	5e-05	0.00315052	yes
GSBRNA2T00037293001	BnaC04g50490D	GSBRNA2G00037293001	GSBRNA2G00037293001	chrC04:48140797-48142422	UP	PC20	OK	15.0427	47.3922	1.65559	2.91276	5e-05	0.00315052	yes
GSBRNA2T00014798001	BnaC02g48560D	GSBRNA2G00014798001	GSBRNA2G00014798001	chrC02_random:4849280-4851685	UP	PC20	OK	41.4257	130.635	1.65694	2.39018	0.0011	0.0398877	yes
GSBRNA2T00062627001	BnaA03g10920D	GSBRNA2G00062627001	GSBRNA2G00062627001	chrA03:4899927-4906150	UP	PC20	OK	1.36288	4.30169	1.65824	2.34703	0.00145	0.0490936	yes
GSBRNA2T00064062001	BnaC08g46130D	GSBRNA2G00064062001	GSBRNA2G00064062001	chrC08:38472004-38473852	UP	PC20	OK	3.23782	10.2228	1.65869	2.4829	0.001	0.0370366	yes
GSBRNA2T00058242001	BnaC03g59280D	GSBRNA2G00058242001	GSBRNA2G00058242001	chrC03:48577893-48581149	UP	PC20	OK	2.24546	7.09654	1.6601	2.43646	0.001	0.0370366	yes
GSBRNA2T00023510001	BnaC09g51620D	GSBRNA2G00023510001	GSBRNA2G00023510001	chrC09_random:781617-783242	UP	PC20	OK	12.7867	40.4608	1.66188	2.6744	0.0003	0.014397	yes
GSBRNA2T00121760001	BnaC08g21160D	GSBRNA2G00121760001	GSBRNA2G00121760001	chrC08:23748038-23750373	UP	PC20	OK	11.0727	35.0515	1.66247	2.89018	0.0002	0.0102143	yes
GSBRNA2T00088390001	BnaA07g14280D	GSBRNA2G00088390001	GSBRNA2G00088390001	chrA07:12628640-12630819	UP	PC20	OK	5.83132	18.4739	1.6636	2.65278	0.00035	0.0162035	yes
GSBRNA2T00153777001	BnaA05g23160D	GSBRNA2G00153777001	GSBRNA2G00153777001	chrA05:17559583-17560729	UP	PC20	OK	4.93079	15.6478	1.66606	2.42299	0.00085	0.0325239	yes
GSBRNA2T00018828001	BnaA06g36710D	GSBRNA2G00018828001	GSBRNA2G00018828001	chrA06:24010801-24012736	UP	PC20	OK	2.85333	9.08142	1.67027	2.58863	0.0007	0.0284206	yes
GSBRNA2T00086221001	BnaC02g43000D	GSBRNA2G00086221001	GSBRNA2G00086221001	chrC02:45418873-45419570	UP	PC20	OK	43.7526	139.498	1.6728	3.08299	5e-05	0.00315052	yes
GSBRNA2T00019869001	BnaCnng30830D	GSBRNA2G00019869001	GSBRNA2G00019869001	chrCnn_random:29303764-29307039	UP	PC20	OK	11.355	36.2356	1.67407	2.88178	0.00025	0.0123267	yes
GSBRNA2T00052690001	BnaA02g07120D	GSBRNA2G00052690001	GSBRNA2G00052690001	chrA02:3392424-3393327	UP	PC20	OK	17.7368	56.8549	1.68054	2.88931	5e-05	0.00315052	yes
GSBRNA2T00053746001	BnaC06g06860D	GSBRNA2G00053746001	GSBRNA2G00053746001	chrC06:7431999-7435319	UP	PC20	OK	4.09616	13.163	1.68415	2.68029	0.0002	0.0102143	yes
GSBRNA2T00017387001	BnaCnng29300D	GSBRNA2G00017387001	GSBRNA2G00017387001	chrCnn_random:27756319-27759019	UP	PC20	OK	19.1036	61.4729	1.68611	2.63518	0.00045	0.0198844	yes
GSBRNA2T00071543001	BnaC03g33810D	GSBRNA2G00071543001	GSBRNA2G00071543001	chrC03:20585726-20587639	UP	PC20	OK	7.38716	23.797	1.68769	2.70618	0.00015	0.00807736	yes
GSBRNA2T00079776001	BnaC02g41520D	GSBRNA2G00079776001	GSBRNA2G00079776001	chrC02:44381594-44384530	UP	PC20	OK	11.2309	36.2397	1.69009	2.77525	0.0002	0.0102143	yes
GSBRNA2T00140359001	BnaC03g06120D	GSBRNA2G00140359001	GSBRNA2G00140359001	chrC03:2968009-2969560	UP	PC20	OK	18.9681	61.2475	1.69107	2.56382	0.00035	0.0162035	yes
GSBRNA2T00015702001	BnaA09g30800D	GSBRNA2G00015702001	GSBRNA2G00015702001	chrA09:22922675-22925506	UP	PC20	OK	16.7059	53.9909	1.69236	2.66731	0.0005	0.0215827	yes
GSBRNA2T00071173001	BnaC09g24050D	GSBRNA2G00071173001	GSBRNA2G00071173001	chrC09:21919281-21921373	UP	PC20	OK	3.14748	10.1733	1.69252	2.61825	0.00045	0.0198844	yes
GSBRNA2T00094437001	BnaC09g36590D	GSBRNA2G00094437001	GSBRNA2G00094437001	chrC09:39939723-39942180	UP	PC20	OK	19.797	64.1149	1.69538	2.85032	0.00025	0.0123267	yes
GSBRNA2T00115328001	BnaC07g22090D	GSBRNA2G00115328001	GSBRNA2G00115328001	chrC07:28598121-28600488	UP	PC20	OK	4.53019	14.6923	1.69742	2.86591	5e-05	0.00315052	yes
GSBRNA2T00110212001	BnaA10g07760D	GSBRNA2G00110212001	GSBRNA2G00110212001	chrA10:6296761-6299266	UP	PC20	OK	2.91499	9.49765	1.70408	2.76343	0.00035	0.0162035	yes
GSBRNA2T00076258001	BnaC05g48240D	GSBRNA2G00076258001	GSBRNA2G00076258001	chrC05:42805947-42809057	UP	PC20	OK	14.2657	46.5129	1.70508	2.88633	0.0002	0.0102143	yes
GSBRNA2T00009284001	BnaA05g20240D	GSBRNA2G00009284001	GSBRNA2G00009284001	chrA05:15644137-15644862	UP	PC20	OK	15.1447	49.5626	1.71044	2.85835	0.0004	0.0180197	yes
GSBRNA2T00005321001	BnaAnng34650D	GSBRNA2G00005321001	GSBRNA2G00005321001	chrAnn_random:39413765-39415784	UP	PC20	OK	5.11131	16.7429	1.71178	2.72826	5e-05	0.00315052	yes
GSBRNA2T00010809001	BnaC03g14810D	GSBRNA2G00010809001	GSBRNA2G00010809001	chrC03:7212246-7214403	UP	PC20	OK	1.9854	6.55616	1.72342	2.5307	0.00095	0.0355101	yes
GSBRNA2T00151930001	BnaC02g04560D	GSBRNA2G00151930001	GSBRNA2G00151930001	chrC02:2419659-2421380	UP	PC20	OK	9.01034	29.7579	1.72362	2.7762	0.0002	0.0102143	yes
GSBRNA2T00147874001	BnaC06g37960D	GSBRNA2G00147874001	GSBRNA2G00147874001	chrC06:35745130-35746977	UP	PC20	OK	5.70397	18.8445	1.7241	2.87182	0.0001	0.00574178	yes
GSBRNA2T00076064001	BnaC05g36760D	GSBRNA2G00076064001	GSBRNA2G00076064001	chrC05:36024618-36027890	UP	PC20	OK	20.6091	68.1511	1.72546	2.92471	0.00015	0.00807736	yes
GSBRNA2T00123151001	BnaC01g09700D	GSBRNA2G00123151001	GSBRNA2G00123151001	chrC01:5683763-5686252	UP	PC20	OK	12.427	41.1712	1.72816	2.74994	0.0004	0.0180197	yes
GSBRNA2T00095866001	BnaC01g32590D	GSBRNA2G00095866001	GSBRNA2G00095866001	chrC01:31841911-31843983	UP	PC20	OK	3.38472	11.2421	1.7318	2.64445	0.0002	0.0102143	yes
GSBRNA2T00135378001	BnaA10g17590D	GSBRNA2G00135378001	GSBRNA2G00135378001	chrA10:12965926-12972031	UP	PC20	OK	4.23969	14.0832	1.73195	2.95438	0.0002	0.0102143	yes
GSBRNA2T00121972001	BnaA09g36820D	GSBRNA2G00121972001	GSBRNA2G00121972001	chrA09:26589702-26592855	UP	PC20	OK	6.23589	20.7481	1.73431	2.97245	0.00015	0.00807736	yes
GSBRNA2T00131733001	BnaA01g12340D	GSBRNA2G00131733001	GSBRNA2G00131733001	chrA01:6165883-6166560	UP	PC20	OK	29.3062	97.6392	1.73625	2.9541	5e-05	0.00315052	yes
GSBRNA2T00102941001	BnaA08g22690D	GSBRNA2G00102941001	GSBRNA2G00102941001	chrA08:16403572-16404911	UP	PC20	OK	5.40942	18.0528	1.73867	2.72754	0.0004	0.0180197	yes
GSBRNA2T00151606001	BnaA03g25630D	GSBRNA2G00151606001	GSBRNA2G00151606001	chrA03:12452672-12453915	UP	PC20	OK	6.884	22.997	1.74013	2.85676	0.00015	0.00807736	yes
GSBRNA2T00017189001	BnaC06g43540D	GSBRNA2G00017189001	GSBRNA2G00017189001	chrC06_random:2960187-2963969	UP	PC20	OK	6.32927	21.1444	1.74017	2.98828	0.0002	0.0102143	yes
GSBRNA2T00015050001	BnaCnng72960D	GSBRNA2G00015050001	GSBRNA2G00015050001	chrCnn_random:73408093-73408766	UP	PC20	OK	16.2887	54.4258	1.74042	2.76181	0.00025	0.0123267	yes
GSBRNA2T00067715001	BnaC05g10770D	GSBRNA2G00067715001	GSBRNA2G00067715001	chrC05:6194067-6195705	UP	PC20	OK	20.8246	70.115	1.75143	2.84103	0.00015	0.00807736	yes
GSBRNA2T00146254001	BnaA07g35800D	GSBRNA2G00146254001	GSBRNA2G00146254001	chrA07:23959932-23961219	UP	PC20	OK	8.96254	30.2964	1.75717	2.51875	0.00125	0.0440112	yes
GSBRNA2T00065567001	BnaC05g17480D	GSBRNA2G00065567001	GSBRNA2G00065567001	chrC05:11179841-11181269	UP	PC20	OK	9.99775	33.8617	1.75998	2.89719	0.0001	0.00574178	yes
GSBRNA2T00024673001	BnaA06g01180D	GSBRNA2G00024673001	GSBRNA2G00024673001	chrA06:759467-760540	UP	PC20	OK	5.96252	20.2351	1.76287	2.80962	0.00025	0.0123267	yes
GSBRNA2T00149459001	BnaA01g16370D	GSBRNA2G00149459001	GSBRNA2G00149459001	chrA01:8442364-8444225	UP	PC20	OK	13.6046	46.2102	1.76411	2.81842	0.0001	0.00574178	yes
GSBRNA2T00078146001	BnaA06g32020D	GSBRNA2G00078146001	GSBRNA2G00078146001	chrA06:21427806-21429648	UP	PC20	OK	3.82692	13.0247	1.76699	2.74794	0.00045	0.0198844	yes
GSBRNA2T00085819001	BnaCnng13990D	GSBRNA2G00085819001	GSBRNA2G00085819001	chrCnn_random:12749326-12751138	UP	PC20	OK	4.12133	14.0356	1.76791	2.70367	0.0003	0.014397	yes
GSBRNA2T00057066001	BnaC08g41730D	GSBRNA2G00057066001	GSBRNA2G00057066001	chrC08:36220375-36222133	UP	PC20	OK	8.22902	28.0583	1.76964	2.90805	0.0001	0.00574178	yes
GSBRNA2T00037133001	BnaA09g35450D	GSBRNA2G00037133001	GSBRNA2G00037133001	chrA09:25846823-25849074	UP	PC20	OK	3.65678	12.4797	1.77094	2.62651	0.0007	0.0284206	yes
GSBRNA2T00096589001	BnaAnng32690D	GSBRNA2G00096589001	GSBRNA2G00096589001	chrAnn_random:37363825-37365833	UP	PC20	OK	6.91876	23.6668	1.77428	2.64596	0.00035	0.0162035	yes
GSBRNA2T00001911001	BnaA06g35100D	GSBRNA2G00001911001	GSBRNA2G00001911001	chrA06:23178692-23179882	UP	PC20	OK	5.64262	19.327	1.77618	2.61903	0.0005	0.0215827	yes
GSBRNA2T00109309001	BnaC08g22920D	GSBRNA2G00109309001	GSBRNA2G00109309001	chrC08:25397464-25398313	UP	PC20	OK	30.9002	105.853	1.77638	3.10633	5e-05	0.00315052	yes
GSBRNA2T00067747001	BnaC05g10520D	GSBRNA2G00067747001	GSBRNA2G00067747001	chrC05:6030821-6032433	UP	PC20	OK	21.9765	75.3287	1.77724	2.91429	0.00025	0.0123267	yes
GSBRNA2T00050251001	BnaA05g09030D	GSBRNA2G00050251001	GSBRNA2G00050251001	chrA05:4958948-4961816	UP	PC20	OK	4.16256	14.2899	1.77946	2.88609	5e-05	0.00315052	yes
GSBRNA2T00099351001	BnaA07g21490D	GSBRNA2G00099351001	GSBRNA2G00099351001	chrA07:16630155-16631174	UP	PC20	OK	24.7793	85.144	1.78077	2.93816	0.0004	0.0180197	yes
GSBRNA2T00150548001	BnaA10g00370D	GSBRNA2G00150548001	GSBRNA2G00150548001	chrA10:186506-189247	UP	PC20	OK	3.97047	13.6579	1.78236	2.83411	0.0003	0.014397	yes
GSBRNA2T00130956001	BnaC01g02870D	GSBRNA2G00130956001	GSBRNA2G00130956001	chrC01:1511473-1523983	UP	PC20	OK	1.71935	5.93462	1.78729	2.80692	0.0001	0.00574178	yes
GSBRNA2T00136131001	BnaA10g23820D	GSBRNA2G00136131001	GSBRNA2G00136131001	chrA10:15668015-15669789	UP	PC20	OK	34.8403	120.292	1.78771	2.85433	0.00015	0.00807736	yes
GSBRNA2T00029761001	BnaA02g06880D	GSBRNA2G00029761001	GSBRNA2G00029761001	chrA02:3265338-3267293	UP	PC20	OK	2.44372	8.45599	1.7909	2.63806	0.0005	0.0215827	yes
GSBRNA2T00012845001	BnaC08g13980D	GSBRNA2G00012845001	GSBRNA2G00012845001	chrC08:18962419-18965784	UP	PC20	OK	19.5013	67.7023	1.79563	2.77543	5e-05	0.00315052	yes
GSBRNA2T00038416001	BnaUnng00020D	GSBRNA2G00038416001	GSBRNA2G00038416001	chrUnn_random:12540-13020	UP	PC20	OK	148.607	516.675	1.79775	2.8117	0.00015	0.00807736	yes
GSBRNA2T00073348001	BnaC02g34840D	GSBRNA2G00073348001	GSBRNA2G00073348001	chrC02:37456416-37460343	UP	PC20	OK	5.81673	20.2328	1.79842	2.87627	5e-05	0.00315052	yes
GSBRNA2T00077733001	BnaA03g51590D	GSBRNA2G00077733001	GSBRNA2G00077733001	chrA03:26810566-26812517	UP	PC20	OK	3.32071	11.5568	1.79918	2.4829	0.0007	0.0284206	yes
GSBRNA2T00096568001	BnaA06g38470D	GSBRNA2G00096568001	GSBRNA2G00096568001	chrA06_random:560475-561289	UP	PC20	OK	50.2958	175.061	1.79935	2.79734	0.0001	0.00574178	yes
GSBRNA2T00058128001	BnaA01g08120D	GSBRNA2G00058128001	GSBRNA2G00058128001	chrA01:3845658-3848204	UP	PC20	OK	10.793	37.5768	1.79975	2.95828	0.0001	0.00574178	yes
GSBRNA2T00146524001	BnaA07g33410D	GSBRNA2G00146524001	GSBRNA2G00146524001	chrA07:22925565-22927410	UP	PC20	OK	1.83468	6.39847	1.8022	2.58221	0.00115	0.0413608	yes
GSBRNA2T00052859001	BnaA10g10580D	GSBRNA2G00052859001	GSBRNA2G00052859001	chrA10:9009955-9011787	UP	PC20	OK	5.66835	19.8067	1.80498	2.89357	5e-05	0.00315052	yes
GSBRNA2T00049104001	BnaC06g23720D	GSBRNA2G00049104001	GSBRNA2G00049104001	chrC06:25484119-25486354	UP	PC20	OK	6.38926	22.4166	1.81085	3.05956	5e-05	0.00315052	yes
GSBRNA2T00033770001	BnaA08g30600D	GSBRNA2G00033770001	GSBRNA2G00033770001	chrA08_random:1606091-1607737	UP	PC20	OK	7.763	27.2526	1.81171	2.88718	0.0001	0.00574178	yes
GSBRNA2T00014756001	BnaC05g51340D	GSBRNA2G00014756001	GSBRNA2G00014756001	chrC05_random:2313774-2314164	UP	PC20	OK	19.6426	69.0831	1.81435	2.4709	0.0009	0.034061	yes
GSBRNA2T00121783001	BnaC08g21320D	GSBRNA2G00121783001	GSBRNA2G00121783001	chrC08:23934069-23936022	UP	PC20	OK	54.9584	193.526	1.81612	2.52984	0.00055	0.0233056	yes
GSBRNA2T00096006001	BnaA10g29660D	GSBRNA2G00096006001	GSBRNA2G00096006001	chrA10_random:1856429-1858119	UP	PC20	OK	9.99054	35.1802	1.81613	2.90623	5e-05	0.00315052	yes
GSBRNA2T00113751001	BnaA09g26030D	GSBRNA2G00113751001	GSBRNA2G00113751001	chrA09:19155700-19157869	UP	PC20	OK	4.8277	17.0165	1.81753	2.90421	5e-05	0.00315052	yes
GSBRNA2T00008113001	BnaA04g29360D	GSBRNA2G00008113001	GSBRNA2G00008113001	chrA04_random:1342480-1344706	UP	PC20	OK	6.6504	23.4603	1.81871	3.05981	0.0002	0.0102143	yes
GSBRNA2T00047180001	BnaA08g26490D	GSBRNA2G00047180001	GSBRNA2G00047180001	chrA08:17915643-17916153	UP	PC20	OK	22.7447	80.3922	1.82153	3.14224	0.0001	0.00574178	yes
GSBRNA2T00025437001	BnaC08g49480D	GSBRNA2G00025437001	GSBRNA2G00025437001	chrC08_random:4224862-4226008	UP	PC20	OK	6.60475	23.3723	1.82322	2.70621	0.0003	0.014397	yes
GSBRNA2T00116913001	BnaA05g06580D	GSBRNA2G00116913001	GSBRNA2G00116913001	chrA05:3583500-3586306	UP	PC20	OK	3.44278	12.1851	1.82348	2.69699	0.00045	0.0198844	yes
GSBRNA2T00009745001	BnaA09g03100D	GSBRNA2G00009745001	GSBRNA2G00009745001	chrA09:1577193-1578733	UP	PC20	OK	2.88506	10.2237	1.82524	2.53375	0.0011	0.0398877	yes
GSBRNA2T00106930001	BnaC09g50050D	GSBRNA2G00106930001	GSBRNA2G00106930001	chrC09:48083687-48085090	UP	PC20	OK	18.1406	64.5079	1.83026	2.99218	0.0001	0.00574178	yes
GSBRNA2T00152677001	BnaC04g07740D	GSBRNA2G00152677001	GSBRNA2G00152677001	chrC04:5741580-5744303	UP	PC20	OK	3.52149	12.5258	1.83064	2.57972	0.0008	0.0311762	yes
GSBRNA2T00044572001	BnaC05g09840D	GSBRNA2G00044572001	GSBRNA2G00044572001	chrC05:5493257-5495571	UP	PC20	OK	20.384	72.5204	1.83095	2.93052	5e-05	0.00315052	yes
GSBRNA2T00103000001	BnaA08g23150D	GSBRNA2G00103000001	GSBRNA2G00103000001	chrA08:16596054-16597595	UP	PC20	OK	9.80294	34.934	1.83335	3.05542	0.0001	0.00574178	yes
GSBRNA2T00072031001	BnaCnng58090D	GSBRNA2G00072031001	GSBRNA2G00072031001	chrCnn_random:57821450-57822991	UP	PC20	OK	54.198	193.153	1.83343	2.58476	0.00035	0.0162035	yes
GSBRNA2T00115423001	BnaC07g21450D	GSBRNA2G00115423001	GSBRNA2G00115423001	chrC07:28107864-28109599	UP	PC20	OK	2.28466	8.14865	1.83458	2.50843	0.0007	0.0284206	yes
GSBRNA2T00015903001	BnaC03g27140D	GSBRNA2G00015903001	GSBRNA2G00015903001	chrC03:15656750-15658327	UP	PC20	OK	10.0538	35.8718	1.8351	2.98536	5e-05	0.00315052	yes
GSBRNA2T00028749001	BnaC03g22200D	GSBRNA2G00028749001	GSBRNA2G00028749001	chrC03:12128932-12130252	UP	PC20	OK	8.5572	30.568	1.83681	2.77573	5e-05	0.00315052	yes
GSBRNA2T00139365001	BnaC07g24080D	GSBRNA2G00139365001	GSBRNA2G00139365001	chrC07:30476858-30479286	UP	PC20	OK	12.384	44.3247	1.83964	3.18893	5e-05	0.00315052	yes
GSBRNA2T00123445001	BnaCnng01200D	GSBRNA2G00123445001	GSBRNA2G00123445001	chrCnn_random:1359889-1361831	UP	PC20	OK	2.34667	8.41405	1.84219	2.53005	0.0014	0.0478684	yes
GSBRNA2T00032750001	BnaC09g11350D	GSBRNA2G00032750001	GSBRNA2G00032750001	chrC09:7924402-7925738	UP	PC20	OK	5.42769	19.5106	1.84585	2.80154	0.0004	0.0180197	yes
GSBRNA2T00109018001	BnaC08g25010D	GSBRNA2G00109018001	GSBRNA2G00109018001	chrC08:26922444-26924540	UP	PC20	OK	3.48231	12.5254	1.84674	2.62525	0.00095	0.0355101	yes
GSBRNA2T00139622001	BnaC08g17850D	GSBRNA2G00139622001	GSBRNA2G00139622001	chrC08:21295136-21295837	UP	PC20	OK	10.1292	36.4537	1.84754	2.69411	0.00025	0.0123267	yes
GSBRNA2T00083506001	BnaAnng29470D	GSBRNA2G00083506001	GSBRNA2G00083506001	chrAnn_random:33725266-33726375	UP	PC20	OK	4.05497	14.6931	1.85737	2.37981	0.0014	0.0478684	yes
GSBRNA2T00141803001	BnaA03g16770D	GSBRNA2G00141803001	GSBRNA2G00141803001	chrA03:7845989-7848249	UP	PC20	OK	1.85083	6.72551	1.86147	2.8069	0.00045	0.0198844	yes
GSBRNA2T00031571001	BnaC09g43250D	GSBRNA2G00031571001	GSBRNA2G00031571001	chrC09:44565598-44567649	UP	PC20	OK	8.46473	30.8009	1.86344	2.72705	0.0006	0.0251389	yes
GSBRNA2T00064194001	BnaA02g20030D	GSBRNA2G00064194001	GSBRNA2G00064194001	chrA02:12363859-12365066	UP	PC20	OK	10.4556	38.108	1.86581	3.1359	0.00015	0.00807736	yes
GSBRNA2T00016503001	BnaCnng28420D	GSBRNA2G00016503001	GSBRNA2G00016503001	chrCnn_random:26933801-26938640	UP	PC20	OK	1.57566	5.77051	1.87274	2.81469	5e-05	0.00315052	yes
GSBRNA2T00099706001	BnaC07g42640D	GSBRNA2G00099706001	GSBRNA2G00099706001	chrC07:42041241-42042716	UP	PC20	OK	21.6194	79.2026	1.87323	3.03279	5e-05	0.00315052	yes
GSBRNA2T00142173001	BnaA03g13740D	GSBRNA2G00142173001	GSBRNA2G00142173001	chrA03:6307491-6309741	UP	PC20	OK	5.4247	19.9082	1.87575	2.84719	0.0005	0.0215827	yes
GSBRNA2T00040108001	BnaC03g66270D	GSBRNA2G00040108001	GSBRNA2G00040108001	chrC03:56035833-56037719	UP	PC20	OK	20.8741	76.6269	1.87614	3.14617	5e-05	0.00315052	yes
GSBRNA2T00086539001	BnaC02g42100D	GSBRNA2G00086539001	GSBRNA2G00086539001	chrC02:44873792-44875533	UP	PC20	OK	3.45852	12.7519	1.88249	2.55897	0.0007	0.0284206	yes
GSBRNA2T00041290001	BnaCnng05510D	GSBRNA2G00041290001	GSBRNA2G00041290001	chrCnn_random:5117224-5118798	UP	PC20	OK	9.31787	34.3612	1.88271	3.10606	5e-05	0.00315052	yes
GSBRNA2T00086084001	BnaA03g17030D	GSBRNA2G00086084001	GSBRNA2G00086084001	chrA03:7987202-7988660	UP	PC20	OK	9.03423	33.3364	1.88362	2.57449	0.0005	0.0215827	yes
GSBRNA2T00081054001	BnaA02g13820D	GSBRNA2G00081054001	GSBRNA2G00081054001	chrA02:7602844-7605611	UP	PC20	OK	2.63767	9.7378	1.88433	2.93057	0.00025	0.0123267	yes
GSBRNA2T00145796001	BnaC03g52400D	GSBRNA2G00145796001	GSBRNA2G00145796001	chrC03:37235459-37237976	UP	PC20	OK	7.76623	28.6781	1.88467	3.26279	5e-05	0.00315052	yes
GSBRNA2T00005367001	BnaA04g22070D	GSBRNA2G00005367001	GSBRNA2G00005367001	chrA04:16713201-16714313	UP	PC20	OK	23.0532	85.301	1.8876	2.91692	0.00015	0.00807736	yes
GSBRNA2T00106944001	BnaC09g49920D	GSBRNA2G00106944001	GSBRNA2G00106944001	chrC09:48039378-48041016	UP	PC20	OK	2.2147	8.22349	1.89264	2.72581	0.001	0.0370366	yes
GSBRNA2T00046590001	BnaCnng47130D	GSBRNA2G00046590001	GSBRNA2G00046590001	chrCnn_random:46541337-46544297	UP	PC20	OK	42.4539	157.759	1.89375	3.11572	5e-05	0.00315052	yes
GSBRNA2T00087932001	BnaC04g03750D	GSBRNA2G00087932001	GSBRNA2G00087932001	chrC04:2700836-2704186	UP	PC20	OK	4.31703	16.0657	1.89587	2.74243	0.0004	0.0180197	yes
GSBRNA2T00072298001	BnaA02g27990D	GSBRNA2G00072298001	GSBRNA2G00072298001	chrA02:20677824-20680307	UP	PC20	OK	5.11038	19.0345	1.89712	2.87547	0.0001	0.00574178	yes
GSBRNA2T00015773001	BnaA09g30300D	GSBRNA2G00015773001	GSBRNA2G00015773001	chrA09:22552852-22555239	UP	PC20	OK	3.59139	13.4448	1.90443	3.24171	5e-05	0.00315052	yes
GSBRNA2T00149628001	BnaA01g15000D	GSBRNA2G00149628001	GSBRNA2G00149628001	chrA01:7620768-7622405	UP	PC20	OK	49.0187	183.614	1.90527	2.96567	0.0002	0.0102143	yes
GSBRNA2T00087525001	BnaA09g08810D	GSBRNA2G00087525001	GSBRNA2G00087525001	chrA09:4393514-4396241	UP	PC20	OK	5.42917	20.3503	1.90625	2.93779	0.0002	0.0102143	yes
GSBRNA2T00006771001	BnaA09g38900D	GSBRNA2G00006771001	GSBRNA2G00006771001	chrA09:27684599-27685913	UP	PC20	OK	3.01267	11.3729	1.91648	2.54217	0.0005	0.0215827	yes
GSBRNA2T00079135001	BnaC03g21360D	GSBRNA2G00079135001	GSBRNA2G00079135001	chrC03:11540402-11542689	UP	PC20	OK	3.65738	13.8103	1.91686	3.03633	5e-05	0.00315052	yes
GSBRNA2T00121706001	BnaC08g20810D	GSBRNA2G00121706001	GSBRNA2G00121706001	chrC08:23415999-23421543	UP	PC20	OK	7.46364	28.3341	1.92459	2.9943	0.0001	0.00574178	yes
GSBRNA2T00131539001	BnaA01g10780D	GSBRNA2G00131539001	GSBRNA2G00131539001	chrA01:5392561-5394801	UP	PC20	OK	9.96512	37.8965	1.92711	3.32375	5e-05	0.00315052	yes
GSBRNA2T00055929001	BnaC03g62800D	GSBRNA2G00055929001	GSBRNA2G00055929001	chrC03:52086799-52091108	UP	PC20	OK	11.2764	43.2114	1.93811	3.11491	0.0002	0.0102143	yes
GSBRNA2T00138339001	BnaC01g13940D	GSBRNA2G00138339001	GSBRNA2G00138339001	chrC01:9071985-9072396	UP	PC20	OK	57.1534	219.293	1.93995	3.32046	5e-05	0.00315052	yes
GSBRNA2T00151868001	BnaC02g05070D	GSBRNA2G00151868001	GSBRNA2G00151868001	chrC02:2648397-2649984	UP	PC20	OK	13.7379	52.8306	1.94321	3.00039	5e-05	0.00315052	yes
GSBRNA2T00055553001	BnaCnng51910D	GSBRNA2G00055553001	GSBRNA2G00055553001	chrCnn_random:51414351-51415645	UP	PC20	OK	3.11136	11.9742	1.94431	2.66352	0.00075	0.0297778	yes
GSBRNA2T00129952001	BnaA03g04590D	GSBRNA2G00129952001	GSBRNA2G00129952001	chrA03:2138890-2140466	UP	PC20	OK	9.83493	37.881	1.94549	3.00733	5e-05	0.00315052	yes
GSBRNA2T00006337001	BnaA04g18040D	GSBRNA2G00006337001	GSBRNA2G00006337001	chrA04:14536462-14537137	UP	PC20	OK	11.7281	45.3518	1.9512	2.75338	0.00085	0.0325239	yes
GSBRNA2T00150814001	BnaA08g17380D	GSBRNA2G00150814001	GSBRNA2G00150814001	chrA08:13821918-13825861	UP	PC20	OK	13.5107	52.4531	1.95692	3.09241	5e-05	0.00315052	yes
GSBRNA2T00109355001	BnaC08g22570D	GSBRNA2G00109355001	GSBRNA2G00109355001	chrC08:25215897-25220432	UP	PC20	OK	3.47976	13.5279	1.95888	3.05907	5e-05	0.00315052	yes
GSBRNA2T00015707001	BnaA09g30760D	GSBRNA2G00015707001	GSBRNA2G00015707001	chrA09:22904350-22906200	UP	PC20	OK	3.04842	11.9041	1.96532	2.89809	0.00035	0.0162035	yes
GSBRNA2T00022100001	BnaC06g24480D	GSBRNA2G00022100001	GSBRNA2G00022100001	chrC06:26245213-26247077	UP	PC20	OK	2.90206	11.3537	1.96801	2.48818	0.00145	0.0490936	yes
GSBRNA2T00156011001	BnaC08g26910D	GSBRNA2G00156011001	GSBRNA2G00156011001	chrC08:28128341-28130632	UP	PC20	OK	34.984	136.884	1.96818	2.55378	0.00095	0.0355101	yes
GSBRNA2T00004533001	BnaA08g11740D	GSBRNA2G00004533001	GSBRNA2G00004533001	chrA08:10557003-10558887	UP	PC20	OK	5.65457	22.1749	1.97144	3.34791	5e-05	0.00315052	yes
GSBRNA2T00006501001	BnaC05g14050D	GSBRNA2G00006501001	GSBRNA2G00006501001	chrC05:8132533-8133570	UP	PC20	OK	3.82538	15.0226	1.97346	2.88537	0.0006	0.0251389	yes
GSBRNA2T00051546001	BnaCnng06770D	GSBRNA2G00051546001	GSBRNA2G00051546001	chrCnn_random:5830208-5831096	UP	PC20	OK	33.5657	131.924	1.97465	3.24912	5e-05	0.00315052	yes
GSBRNA2T00049638001	BnaC06g31940D	GSBRNA2G00049638001	GSBRNA2G00049638001	chrC06:32312003-32312669	UP	PC20	OK	16.4375	64.6847	1.97643	3.15095	5e-05	0.00315052	yes
GSBRNA2T00019319001	BnaC08g42830D	GSBRNA2G00019319001	GSBRNA2G00019319001	chrC08:36850906-36852118	UP	PC20	OK	73.7893	290.643	1.97776	2.57163	0.00105	0.0384482	yes
GSBRNA2T00042107001	BnaA06g25550D	GSBRNA2G00042107001	GSBRNA2G00042107001	chrA06:17672089-17674087	UP	PC20	OK	15.3542	60.5967	1.98061	3.32964	5e-05	0.00315052	yes
GSBRNA2T00049634001	BnaC06g31950D	GSBRNA2G00049634001	GSBRNA2G00049634001	chrC06:32324393-32326110	UP	PC20	OK	8.505	33.6768	1.98537	3.14801	5e-05	0.00315052	yes
GSBRNA2T00016876001	BnaCnng73290D	GSBRNA2G00016876001	GSBRNA2G00016876001	chrCnn_random:73823168-73824316	UP	PC20	OK	62.2094	246.565	1.98676	2.89898	5e-05	0.00315052	yes
GSBRNA2T00107239001	BnaA06g17850D	GSBRNA2G00107239001	GSBRNA2G00107239001	chrA06:10175762-10177975	UP	PC20	OK	22.4241	88.9572	1.98806	3.3069	5e-05	0.00315052	yes
GSBRNA2T00145241001	BnaC08g01080D	GSBRNA2G00145241001	GSBRNA2G00145241001	chrC08:745976-751630	UP	PC20	OK	1.51828	6.04229	1.99266	2.85356	0.0004	0.0180197	yes
GSBRNA2T00034354001	BnaAnng17740D	GSBRNA2G00034354001	GSBRNA2G00034354001	chrAnn_random:18721674-18729506	UP	PC20	OK	4.34759	17.3468	1.99638	3.29859	5e-05	0.00315052	yes
GSBRNA2T00144594001	BnaA06g31640D	GSBRNA2G00144594001	GSBRNA2G00144594001	chrA06:21201546-21202254	UP	PC20	OK	11.7005	46.7759	1.99919	3.0377	0.00015	0.00807736	yes
GSBRNA2T00149264001	BnaA04g00630D	GSBRNA2G00149264001	GSBRNA2G00149264001	chrA04:481474-483013	UP	PC20	OK	15.2361	60.9225	1.99948	3.13882	0.0001	0.00574178	yes
GSBRNA2T00068788001	BnaA09g15080D	GSBRNA2G00068788001	GSBRNA2G00068788001	chrA09:8749023-8750514	UP	PC20	OK	5.19201	20.7736	2.00039	3.22207	5e-05	0.00315052	yes
GSBRNA2T00154203001	BnaA10g14750D	GSBRNA2G00154203001	GSBRNA2G00154203001	chrA10:11669419-11670193	UP	PC20	OK	4.02717	16.1175	2.00079	2.67605	0.0014	0.0478684	yes
GSBRNA2T00114305001	BnaA04g09500D	GSBRNA2G00114305001	GSBRNA2G00114305001	chrA04:8493665-8494265	UP	PC20	OK	7.50211	30.1456	2.00658	2.75295	0.0005	0.0215827	yes
GSBRNA2T00041412001	BnaA02g09590D	GSBRNA2G00041412001	GSBRNA2G00041412001	chrA02:4811612-4812202	UP	PC20	OK	10.2975	41.383	2.00675	2.88857	0.00025	0.0123267	yes
GSBRNA2T00057338001	BnaA09g41600D	GSBRNA2G00057338001	GSBRNA2G00057338001	chrA09:29038955-29041932	UP	PC20	OK	4.28155	17.2401	2.00956	3.1245	5e-05	0.00315052	yes
GSBRNA2T00136602001	BnaC08g39210D	GSBRNA2G00136602001	GSBRNA2G00136602001	chrC08:35026954-35027989	UP	PC20	OK	5.34674	21.5429	2.01048	2.68856	0.00085	0.0325239	yes
GSBRNA2T00027975001	BnaA07g36300D	GSBRNA2G00027975001	GSBRNA2G00027975001	chrA07_random:266173-267738	UP	PC20	OK	12.7947	51.7314	2.01549	3.05786	5e-05	0.00315052	yes
GSBRNA2T00101001001	BnaC04g28260D	GSBRNA2G00101001001	GSBRNA2G00101001001	chrC04:29726485-29727295	UP	PC20	OK	5.64864	22.9605	2.02318	2.78917	0.00035	0.0162035	yes
GSBRNA2T00005758001	BnaA09g07140D	GSBRNA2G00005758001	GSBRNA2G00005758001	chrA09:3488168-3488744	UP	PC20	OK	24.952	101.772	2.02811	3.39424	5e-05	0.00315052	yes
GSBRNA2T00022297001	BnaC07g48760D	GSBRNA2G00022297001	GSBRNA2G00022297001	chrC07_random:1402795-1404036	UP	PC20	OK	2.84623	11.6188	2.02934	2.70823	0.00025	0.0123267	yes
GSBRNA2T00066242001	BnaA05g12980D	GSBRNA2G00066242001	GSBRNA2G00066242001	chrA05:7658287-7663033	UP	PC20	OK	2.37525	9.71197	2.03168	2.98455	0.00015	0.00807736	yes
GSBRNA2T00063277001	BnaA04g26460D	GSBRNA2G00063277001	GSBRNA2G00063277001	chrA04:18775130-18776802	UP	PC20	OK	7.18478	29.3871	2.03217	3.21042	5e-05	0.00315052	yes
GSBRNA2T00087775001	BnaC08g46740D	GSBRNA2G00087775001	GSBRNA2G00087775001	chrC08_random:978693-980285	UP	PC20	OK	8.83024	36.1629	2.03399	3.43447	5e-05	0.00315052	yes
GSBRNA2T00047291001	BnaC03g47090D	GSBRNA2G00047291001	GSBRNA2G00047291001	chrC03:32086054-32086688	UP	PC20	OK	4.95342	20.3412	2.03791	2.63005	0.00115	0.0413608	yes
GSBRNA2T00148744001	BnaA03g09530D	GSBRNA2G00148744001	GSBRNA2G00148744001	chrA03:4270443-4271227	UP	PC20	OK	15.9922	65.8367	2.04152	3.42786	5e-05	0.00315052	yes
GSBRNA2T00120425001	BnaA02g31930D	GSBRNA2G00120425001	GSBRNA2G00120425001	chrA02:23012533-23014309	UP	PC20	OK	2.30726	9.54051	2.04788	2.85329	0.00035	0.0162035	yes
GSBRNA2T00148964001	BnaA03g07740D	GSBRNA2G00148964001	GSBRNA2G00148964001	chrA03:3437115-3439760	UP	PC20	OK	19.882	82.242	2.04841	2.96092	0.00015	0.00807736	yes
GSBRNA2T00009992001	BnaA01g28690D	GSBRNA2G00009992001	GSBRNA2G00009992001	chrA01:19946504-19948041	UP	PC20	OK	2.19209	9.07129	2.049	2.65467	0.0009	0.034061	yes
GSBRNA2T00115099001	BnaC02g10060D	GSBRNA2G00115099001	GSBRNA2G00115099001	chrC02:5726266-5727222	UP	PC20	OK	6.26381	25.9515	2.0507	3.22717	5e-05	0.00315052	yes
GSBRNA2T00145795001	BnaC03g52390D	GSBRNA2G00145795001	GSBRNA2G00145795001	chrC03:37231662-37232303	UP	PC20	OK	25.0434	103.951	2.0534	3.4847	5e-05	0.00315052	yes
GSBRNA2T00046212001	BnaC07g16820D	GSBRNA2G00046212001	GSBRNA2G00046212001	chrC07:22867137-22870547	UP	PC20	OK	1.30546	5.42075	2.05393	2.8237	0.00045	0.0198844	yes
GSBRNA2T00028146001	BnaC02g45000D	GSBRNA2G00028146001	GSBRNA2G00028146001	chrC02_random:819383-820702	UP	PC20	OK	9.37753	39.1469	2.06162	3.22356	0.0001	0.00574178	yes
GSBRNA2T00127123001	BnaC08g32370D	GSBRNA2G00127123001	GSBRNA2G00127123001	chrC08:31333800-31336727	UP	PC20	OK	4.14985	17.3743	2.06582	3.23433	5e-05	0.00315052	yes
GSBRNA2T00021681001	BnaA04g06040D	GSBRNA2G00021681001	GSBRNA2G00021681001	chrA04:4633418-4634381	UP	PC20	OK	2.68088	11.2992	2.07545	2.76021	0.0008	0.0311762	yes
GSBRNA2T00049299001	BnaA03g01040D	GSBRNA2G00049299001	GSBRNA2G00049299001	chrA03:452883-457717	UP	PC20	OK	5.44781	22.9634	2.07558	3.4283	5e-05	0.00315052	yes
GSBRNA2T00054513001	BnaCnng51340D	GSBRNA2G00054513001	GSBRNA2G00054513001	chrCnn_random:50783879-50785936	UP	PC20	OK	5.37617	22.7314	2.08004	3.06502	0.0002	0.0102143	yes
GSBRNA2T00033906001	BnaC03g74630D	GSBRNA2G00033906001	GSBRNA2G00033906001	chrC03_random:2632478-2636297	UP	PC20	OK	1.93631	8.20825	2.08377	2.89706	0.0001	0.00574178	yes
GSBRNA2T00136280001	BnaA10g25120D	GSBRNA2G00136280001	GSBRNA2G00136280001	chrA10:16236346-16237773	UP	PC20	OK	9.38879	39.878	2.08658	3.0184	0.0002	0.0102143	yes
GSBRNA2T00000837001	BnaA06g23600D	GSBRNA2G00000837001	GSBRNA2G00000837001	chrA06:16382925-16384334	UP	PC20	OK	2.7284	11.6359	2.09245	3.00198	0.00025	0.0123267	yes
GSBRNA2T00116091001	BnaC01g16430D	GSBRNA2G00116091001	GSBRNA2G00116091001	chrC01:11270970-11271918	UP	PC20	OK	3.01148	12.8698	2.09545	2.72715	0.00095	0.0355101	yes
GSBRNA2T00078941001	BnaA10g07250D	GSBRNA2G00078941001	GSBRNA2G00078941001	chrA10:5712330-5716555	UP	PC20	OK	10.9567	46.9353	2.09886	3.6455	5e-05	0.00315052	yes
GSBRNA2T00010590001	BnaCnng70940D	GSBRNA2G00010590001	GSBRNA2G00010590001	chrCnn_random:71029524-71031727	UP	PC20	OK	4.08103	17.5441	2.10398	3.42755	5e-05	0.00315052	yes
GSBRNA2T00042766001	BnaA02g35880D	GSBRNA2G00042766001	GSBRNA2G00042766001	chrA02_random:590037-593386	UP	PC20	OK	8.99249	38.7098	2.10591	3.32606	5e-05	0.00315052	yes
GSBRNA2T00101801001	BnaC05g36000D	GSBRNA2G00101801001	GSBRNA2G00101801001	chrC05:35200837-35204750	UP	PC20	OK	2.71967	11.7119	2.10648	3.17014	5e-05	0.00315052	yes
GSBRNA2T00066591001	BnaA07g28600D	GSBRNA2G00066591001	GSBRNA2G00066591001	chrA07:20660123-20661562	UP	PC20	OK	10.3242	44.7511	2.11589	3.51598	5e-05	0.00315052	yes
GSBRNA2T00060864001	BnaC03g14350D	GSBRNA2G00060864001	GSBRNA2G00060864001	chrC03:6890820-6892591	UP	PC20	OK	3.23108	14.0089	2.11625	3.19787	0.00015	0.00807736	yes
GSBRNA2T00085759001	BnaA08g01830D	GSBRNA2G00085759001	GSBRNA2G00085759001	chrA08:1501864-1502698	UP	PC20	OK	4.02899	17.4688	2.11629	2.90762	0.0001	0.00574178	yes
GSBRNA2T00142799001	BnaC07g25020D	GSBRNA2G00142799001	GSBRNA2G00142799001	chrC07:31193613-31194705	UP	PC20	OK	6.3852	27.6982	2.11699	3.31448	5e-05	0.00315052	yes
GSBRNA2T00102996001	BnaA08g23120D	GSBRNA2G00102996001	GSBRNA2G00102996001	chrA08:16576624-16580790	UP	PC20	OK	0.97736	4.25046	2.12065	2.73975	0.00035	0.0162035	yes
GSBRNA2T00099269001	BnaA07g20840D	GSBRNA2G00099269001	GSBRNA2G00099269001	chrA07:16242999-16246794	UP	PC20	OK	1.65591	7.22673	2.12572	3.12523	5e-05	0.00315052	yes
GSBRNA2T00014359001	BnaAnng37080D	GSBRNA2G00014359001	GSBRNA2G00014359001	chrAnn_random:42025653-42027183	UP	PC20	OK	13.3683	58.4761	2.12903	3.50657	5e-05	0.00315052	yes
GSBRNA2T00094352001	BnaC09g37120D	GSBRNA2G00094352001	GSBRNA2G00094352001	chrC09:40468112-40468952	UP	PC20	OK	8.52065	37.3113	2.13058	3.46111	5e-05	0.00315052	yes
GSBRNA2T00020988001	BnaC08g48340D	GSBRNA2G00020988001	GSBRNA2G00020988001	chrC08_random:3305684-3306622	UP	PC20	OK	9.02544	39.5573	2.13187	3.22574	5e-05	0.00315052	yes
GSBRNA2T00086654001	BnaAnng08350D	GSBRNA2G00086654001	GSBRNA2G00086654001	chrAnn_random:8935212-8937883	UP	PC20	OK	4.89589	21.4589	2.13194	3.26055	5e-05	0.00315052	yes
GSBRNA2T00103705001	BnaC06g36590D	GSBRNA2G00103705001	GSBRNA2G00103705001	chrC06:35060231-35063049	UP	PC20	OK	4.19555	18.3919	2.13214	3.03279	0.0002	0.0102143	yes
GSBRNA2T00126852001	BnaA08g09560D	GSBRNA2G00126852001	GSBRNA2G00126852001	chrA08:9118332-9120819	UP	PC20	OK	10.2958	45.2127	2.13468	3.40598	5e-05	0.00315052	yes
GSBRNA2T00033887001	BnaC03g78270D	GSBRNA2G00033887001	GSBRNA2G00033887001	chrC03_random:6450628-6451586	UP	PC20	OK	5.0845	22.3816	2.13814	3.09936	5e-05	0.00315052	yes
GSBRNA2T00108700001	BnaC09g28100D	GSBRNA2G00108700001	GSBRNA2G00108700001	chrC09:30227722-30230050	UP	PC20	OK	1.28488	5.68654	2.14592	3.06762	0.0002	0.0102143	yes
GSBRNA2T00124394001	BnaA07g24860D	GSBRNA2G00124394001	GSBRNA2G00124394001	chrA07:18554803-18560044	UP	PC20	OK	0.791631	3.50412	2.14615	3.05439	0.00015	0.00807736	yes
GSBRNA2T00027751001	BnaA09g51620D	GSBRNA2G00027751001	GSBRNA2G00027751001	chrA09_random:17482-20191	UP	PC20	OK	5.05978	22.4238	2.14788	3.56377	5e-05	0.00315052	yes
GSBRNA2T00139997001	BnaC08g07580D	GSBRNA2G00139997001	GSBRNA2G00139997001	chrC08:10747018-10748791	UP	PC20	OK	2.30781	10.2289	2.14805	3.0814	0.0001	0.00574178	yes
GSBRNA2T00055044001	BnaC08g19730D	GSBRNA2G00055044001	GSBRNA2G00055044001	chrC08:22561391-22565482	UP	PC20	OK	2.94731	13.0952	2.15156	3.74577	5e-05	0.00315052	yes
GSBRNA2T00155313001	BnaC04g45600D	GSBRNA2G00155313001	GSBRNA2G00155313001	chrC04:45210395-45215662	UP	PC20	OK	1.80182	8.00634	2.15169	3.02233	0.0001	0.00574178	yes
GSBRNA2T00020049001	BnaA06g40660D	GSBRNA2G00020049001	GSBRNA2G00020049001	chrA06_random:2148798-2150528	UP	PC20	OK	13.9367	61.969	2.15266	3.54976	5e-05	0.00315052	yes
GSBRNA2T00058004001	BnaA06g11320D	GSBRNA2G00058004001	GSBRNA2G00058004001	chrA06:5907030-5907883	UP	PC20	OK	6.96	31.0164	2.15587	3.38488	5e-05	0.00315052	yes
GSBRNA2T00130048001	BnaA03g05430D	GSBRNA2G00130048001	GSBRNA2G00130048001	chrA03:2480623-2483968	UP	PC20	OK	0.898542	4.01988	2.1615	2.7402	0.0006	0.0251389	yes
GSBRNA2T00015225001	BnaA08g24680D	GSBRNA2G00015225001	GSBRNA2G00015225001	chrA08:17178662-17181086	UP	PC20	OK	2.71034	12.1324	2.16232	3.10348	0.0001	0.00574178	yes
GSBRNA2T00124960001	BnaC03g48070D	GSBRNA2G00124960001	GSBRNA2G00124960001	chrC03:33049751-33051748	UP	PC20	OK	30.9935	138.806	2.16303	3.19628	5e-05	0.00315052	yes
GSBRNA2T00128813001	BnaC07g20290D	GSBRNA2G00128813001	GSBRNA2G00128813001	chrC07:26975422-26977948	UP	PC20	OK	16.2705	72.9354	2.16436	3.12658	0.0003	0.014397	yes
GSBRNA2T00059090001	BnaC02g09510D	GSBRNA2G00059090001	GSBRNA2G00059090001	chrC02:5248885-5250152	UP	PC20	OK	35.608	159.64	2.16455	3.74029	5e-05	0.00315052	yes
GSBRNA2T00065347001	BnaC02g06930D	GSBRNA2G00065347001	GSBRNA2G00065347001	chrC02:3698435-3703165	UP	PC20	OK	0.572556	2.58539	2.17489	2.58586	0.00145	0.0490936	yes
GSBRNA2T00000718001	BnaA06g24410D	GSBRNA2G00000718001	GSBRNA2G00000718001	chrA06:16997115-17000062	UP	PC20	OK	3.64498	16.4761	2.17639	3.29686	5e-05	0.00315052	yes
GSBRNA2T00107772001	BnaC01g11140D	GSBRNA2G00107772001	GSBRNA2G00107772001	chrC01:6928622-6930098	UP	PC20	OK	10.168	45.9981	2.17754	3.2756	5e-05	0.00315052	yes
GSBRNA2T00035434001	BnaA09g47100D	GSBRNA2G00035434001	GSBRNA2G00035434001	chrA09:31788784-31790531	UP	PC20	OK	6.6622	30.1481	2.178	3.29311	5e-05	0.00315052	yes
GSBRNA2T00047920001	BnaA10g12780D	GSBRNA2G00047920001	GSBRNA2G00047920001	chrA10:10438074-10438619	UP	PC20	OK	8.60695	38.9554	2.17825	2.92076	0.0003	0.014397	yes
GSBRNA2T00034514001	BnaAnng17910D	GSBRNA2G00034514001	GSBRNA2G00034514001	chrAnn_random:18849865-18850848	UP	PC20	OK	39.5048	180.646	2.19306	3.01311	5e-05	0.00315052	yes
GSBRNA2T00001821001	BnaA06g34320D	GSBRNA2G00001821001	GSBRNA2G00001821001	chrA06:22667474-22668380	UP	PC20	OK	5.03085	23.0488	2.19582	2.64887	0.00125	0.0440112	yes
GSBRNA2T00157553001	BnaC01g17710D	GSBRNA2G00157553001	GSBRNA2G00157553001	chrC01:12160414-12161790	UP	PC20	OK	40.0025	183.357	2.1965	3.44647	5e-05	0.00315052	yes
GSBRNA2T00100296001	BnaC07g47260D	GSBRNA2G00100296001	GSBRNA2G00100296001	chrC07:44578855-44580583	UP	PC20	OK	18.548	85.422	2.20334	3.6324	5e-05	0.00315052	yes
GSBRNA2T00115416001	BnaC07g21510D	GSBRNA2G00115416001	GSBRNA2G00115416001	chrC07:28165275-28166217	UP	PC20	OK	10.0589	46.4828	2.20823	3.25612	5e-05	0.00315052	yes
GSBRNA2T00038218001	BnaC01g32200D	GSBRNA2G00038218001	GSBRNA2G00038218001	chrC01:31336085-31342280	UP	PC20	OK	1.0311	4.76855	2.20937	2.79361	0.0008	0.0311762	yes
GSBRNA2T00138114001	BnaC01g12360D	GSBRNA2G00138114001	GSBRNA2G00138114001	chrC01:7831974-7834255	UP	PC20	OK	35.5613	164.85	2.21277	3.29013	0.0001	0.00574178	yes
GSBRNA2T00001914001	BnaA06g35120D	GSBRNA2G00001914001	GSBRNA2G00001914001	chrA06:23184972-23185657	UP	PC20	OK	5.94617	27.5706	2.2131	2.96394	0.0003	0.014397	yes
GSBRNA2T00064716001	BnaC04g00440D	GSBRNA2G00064716001	GSBRNA2G00064716001	chrC04:365363-366014	UP	PC20	OK	61.4115	286.075	2.21981	3.13262	5e-05	0.00315052	yes
GSBRNA2T00109160001	BnaC08g24010D	GSBRNA2G00109160001	GSBRNA2G00109160001	chrC08:26138915-26140208	UP	PC20	OK	13.212	61.6075	2.22126	3.67596	5e-05	0.00315052	yes
GSBRNA2T00011209001	BnaA05g34540D	GSBRNA2G00011209001	GSBRNA2G00011209001	chrA05_random:193266-195579	UP	PC20	OK	1.31278	6.12941	2.22312	2.93481	0.00035	0.0162035	yes
GSBRNA2T00147913001	BnaC06g38300D	GSBRNA2G00147913001	GSBRNA2G00147913001	chrC06:35923407-35926713	UP	PC20	OK	8.99078	42.0527	2.22568	3.15202	5e-05	0.00315052	yes
GSBRNA2T00027071001	BnaA05g30880D	GSBRNA2G00027071001	GSBRNA2G00027071001	chrA05:21343616-21346299	UP	PC20	OK	2.50798	11.7636	2.22973	3.12759	0.00015	0.00807736	yes
GSBRNA2T00115339001	BnaC07g22030D	GSBRNA2G00115339001	GSBRNA2G00115339001	chrC07:28550782-28553655	UP	PC20	OK	20.4492	95.92	2.22978	2.96691	0.00035	0.0162035	yes
GSBRNA2T00098228001	BnaAnng33440D	GSBRNA2G00098228001	GSBRNA2G00098228001	chrAnn_random:38122166-38123202	UP	PC20	OK	66.9039	315.021	2.23529	3.08504	0.0001	0.00574178	yes
GSBRNA2T00054536001	BnaCnng51430D	GSBRNA2G00054536001	GSBRNA2G00054536001	chrCnn_random:50860091-50862240	UP	PC20	OK	3.22681	15.2649	2.24204	3.43662	5e-05	0.00315052	yes
GSBRNA2T00057939001	BnaA06g10790D	GSBRNA2G00057939001	GSBRNA2G00057939001	chrA06:5660569-5661729	UP	PC20	OK	2.54953	12.0614	2.24209	2.68772	0.0012	0.0424975	yes
GSBRNA2T00069080001	BnaC06g05410D	GSBRNA2G00069080001	GSBRNA2G00069080001	chrC06:6137001-6138659	UP	PC20	OK	4.61535	21.8792	2.24504	3.14097	5e-05	0.00315052	yes
GSBRNA2T00072389001	BnaA09g18500D	GSBRNA2G00072389001	GSBRNA2G00072389001	chrA09:11485092-11486357	UP	PC20	OK	8.58183	40.703	2.24578	3.49343	5e-05	0.00315052	yes
GSBRNA2T00025284001	BnaA03g55560D	GSBRNA2G00025284001	GSBRNA2G00025284001	chrA03_random:329240-331555	UP	PC20	OK	6.66763	31.6343	2.24625	3.79328	5e-05	0.00315052	yes
GSBRNA2T00092331001	BnaA06g09070D	GSBRNA2G00092331001	GSBRNA2G00092331001	chrA06:4915486-4916991	UP	PC20	OK	6.96416	33.1189	2.24963	3.54431	5e-05	0.00315052	yes
GSBRNA2T00146256001	BnaA07g35790D	GSBRNA2G00146256001	GSBRNA2G00146256001	chrA07:23955442-23956411	UP	PC20	OK	14.9312	71.0832	2.25118	3.4125	5e-05	0.00315052	yes
GSBRNA2T00015387001	BnaA01g34170D	GSBRNA2G00015387001	GSBRNA2G00015387001	chrA01:23073470-23074406	UP	PC20	OK	1.97673	9.52696	2.2689	2.71272	0.00095	0.0355101	yes
GSBRNA2T00075294001	BnaA03g47910D	GSBRNA2G00075294001	GSBRNA2G00075294001	chrA03:24653637-24656658	UP	PC20	OK	15.9587	77.4003	2.27799	3.2332	0.0001	0.00574178	yes
GSBRNA2T00098069001	BnaA06g02960D	GSBRNA2G00098069001	GSBRNA2G00098069001	chrA06:1800240-1802998	UP	PC20	OK	1.58792	7.71114	2.27981	3.48138	5e-05	0.00315052	yes
GSBRNA2T00108084001	BnaC04g33430D	GSBRNA2G00108084001	GSBRNA2G00108084001	chrC04:35061282-35064864	UP	PC20	OK	4.86839	23.6972	2.2832	3.45319	5e-05	0.00315052	yes
GSBRNA2T00035996001	BnaCnng39320D	GSBRNA2G00035996001	GSBRNA2G00035996001	chrCnn_random:38028422-38032031	UP	PC20	OK	19.2949	93.9671	2.28393	3.13669	5e-05	0.00315052	yes
GSBRNA2T00092887001	BnaA05g33110D	GSBRNA2G00092887001	GSBRNA2G00092887001	chrA05:22539611-22543516	UP	PC20	OK	1.9731	9.61982	2.28555	3.02105	0.0003	0.014397	yes
GSBRNA2T00069585001	BnaA02g27010D	GSBRNA2G00069585001	GSBRNA2G00069585001	chrA02:19945984-19947295	UP	PC20	OK	4.0541	19.7664	2.2856	3.49835	5e-05	0.00315052	yes
GSBRNA2T00109885001	BnaA06g22060D	GSBRNA2G00109885001	GSBRNA2G00109885001	chrA06:15417608-15420597	UP	PC20	OK	5.93336	28.9686	2.28757	3.77345	5e-05	0.00315052	yes
GSBRNA2T00049312001	BnaA03g01150D	GSBRNA2G00049312001	GSBRNA2G00049312001	chrA03:549617-552620	UP	PC20	OK	2.75311	13.4736	2.291	3.51501	5e-05	0.00315052	yes
GSBRNA2T00064760001	BnaAnng04790D	GSBRNA2G00064760001	GSBRNA2G00064760001	chrAnn_random:5434670-5435120	UP	PC20	OK	15.1983	74.4832	2.293	3.42612	5e-05	0.00315052	yes
GSBRNA2T00113484001	BnaA03g40660D	GSBRNA2G00113484001	GSBRNA2G00113484001	chrA03:20320936-20321894	UP	PC20	OK	3.17508	15.5846	2.29526	2.92655	0.00055	0.0233056	yes
GSBRNA2T00113591001	BnaA03g39840D	GSBRNA2G00113591001	GSBRNA2G00113591001	chrA03:19904739-19911257	UP	PC20	OK	0.286742	1.4109	2.29879	2.57144	0.0012	0.0424975	yes
GSBRNA2T00065055001	BnaCnng08620D	GSBRNA2G00065055001	GSBRNA2G00065055001	chrCnn_random:8079643-8080493	UP	PC20	OK	3.30611	16.3096	2.30251	3.09052	0.00045	0.0198844	yes
GSBRNA2T00014805001	BnaC02g48610D	GSBRNA2G00014805001	GSBRNA2G00014805001	chrC02_random:4865612-4867355	UP	PC20	OK	1.92385	9.49358	2.30296	2.98545	0.00055	0.0233056	yes
GSBRNA2T00001953001	BnaA06g35470D	GSBRNA2G00001953001	GSBRNA2G00001953001	chrA06:23305119-23307528	UP	PC20	OK	12.2232	60.3547	2.30384	3.49634	5e-05	0.00315052	yes
GSBRNA2T00030463001	BnaA07g38550D	GSBRNA2G00030463001	GSBRNA2G00030463001	chrA07_random:1701486-1705439	UP	PC20	OK	1.52656	7.55544	2.30723	3.50143	5e-05	0.00315052	yes
GSBRNA2T00048010001	BnaC08g46700D	GSBRNA2G00048010001	GSBRNA2G00048010001	chrC08_random:945064-946978	UP	PC20	OK	6.23205	31.0363	2.31618	3.62469	5e-05	0.00315052	yes
GSBRNA2T00036893001	BnaA02g10950D	GSBRNA2G00036893001	GSBRNA2G00036893001	chrA02:5686964-5692238	UP	PC20	OK	19.7695	98.5006	2.31685	3.42951	5e-05	0.00315052	yes
GSBRNA2T00081689001	BnaA07g12410D	GSBRNA2G00081689001	GSBRNA2G00081689001	chrA07:11273602-11274856	UP	PC20	OK	2.86138	14.2754	2.31875	3.05674	0.0002	0.0102143	yes
GSBRNA2T00135635001	BnaA10g19670D	GSBRNA2G00135635001	GSBRNA2G00135635001	chrA10:13887776-13889137	UP	PC20	OK	13.887	69.6887	2.32718	3.33159	0.0001	0.00574178	yes
GSBRNA2T00094844001	BnaC09g40550D	GSBRNA2G00094844001	GSBRNA2G00094844001	chrC09:42926596-42928084	UP	PC20	OK	1.89772	9.53776	2.32938	2.98813	0.0002	0.0102143	yes
GSBRNA2T00046898001	BnaAnng20740D	GSBRNA2G00046898001	GSBRNA2G00046898001	chrAnn_random:22912676-22913131	UP	PC20	OK	20.3401	102.564	2.33412	3.66858	5e-05	0.00315052	yes
GSBRNA2T00009381001	BnaC09g29270D	GSBRNA2G00009381001	GSBRNA2G00009381001	chrC09:31848178-31849135	UP	PC20	OK	3.13319	15.8437	2.3382	2.81803	0.0011	0.0398877	yes
GSBRNA2T00141899001	BnaA03g16020D	GSBRNA2G00141899001	GSBRNA2G00141899001	chrA03:7407851-7409946	UP	PC20	OK	9.67879	49.1577	2.34452	3.75209	5e-05	0.00315052	yes
GSBRNA2T00049744001	BnaC06g31180D	GSBRNA2G00049744001	GSBRNA2G00049744001	chrC06:31811608-31812760	UP	PC20	OK	5.32991	27.1571	2.34915	3.6411	5e-05	0.00315052	yes
GSBRNA2T00079595001	BnaA09g31110D	GSBRNA2G00079595001	GSBRNA2G00079595001	chrA09:23146383-23149318	UP	PC20	OK	4.70107	23.9623	2.34971	3.58091	5e-05	0.00315052	yes
GSBRNA2T00104055001	BnaC09g45480D	GSBRNA2G00104055001	GSBRNA2G00104055001	chrC09:45807840-45808582	UP	PC20	OK	21.9002	111.997	2.35445	3.94685	5e-05	0.00315052	yes
GSBRNA2T00046647001	BnaAnng20550D	GSBRNA2G00046647001	GSBRNA2G00046647001	chrAnn_random:22606183-22608620	UP	PC20	OK	1.89002	9.72061	2.36264	3.04456	0.00025	0.0123267	yes
GSBRNA2T00143776001	BnaC06g21970D	GSBRNA2G00143776001	GSBRNA2G00143776001	chrC06:24121428-24122509	UP	PC20	OK	12.7104	65.4127	2.36356	3.94977	5e-05	0.00315052	yes
GSBRNA2T00087282001	BnaC04g24800D	GSBRNA2G00087282001	GSBRNA2G00087282001	chrC04:25690221-25690932	UP	PC20	OK	4.46533	23.0214	2.36614	2.73607	0.00095	0.0355101	yes
GSBRNA2T00084186001	BnaC09g11080D	GSBRNA2G00084186001	GSBRNA2G00084186001	chrC09:7702918-7704165	UP	PC20	OK	1.30599	6.7512	2.37	2.66852	0.0009	0.034061	yes
GSBRNA2T00141931001	BnaA03g15750D	GSBRNA2G00141931001	GSBRNA2G00141931001	chrA03:7290040-7295561	UP	PC20	OK	0.608143	3.15016	2.37294	3.18118	0.00035	0.0162035	yes
GSBRNA2T00108289001	BnaC02g36110D	GSBRNA2G00108289001	GSBRNA2G00108289001	chrC02:39194921-39196047	UP	PC20	OK	70.1489	364.574	2.37772	3.72619	5e-05	0.00315052	yes
GSBRNA2T00085280001	BnaC03g44780D	GSBRNA2G00085280001	GSBRNA2G00085280001	chrC03:29892346-29896303	UP	PC20	OK	1.24068	6.47585	2.38393	3.39291	5e-05	0.00315052	yes
GSBRNA2T00022277001	BnaC08g48860D	GSBRNA2G00022277001	GSBRNA2G00022277001	chrC08_random:3821475-3823662	UP	PC20	OK	1.82285	9.52072	2.38488	3.35206	5e-05	0.00315052	yes
GSBRNA2T00097000001	BnaA01g30830D	GSBRNA2G00097000001	GSBRNA2G00097000001	chrA01:21042513-21043895	UP	PC20	OK	1.5855	8.30885	2.38971	2.93888	0.0005	0.0215827	yes
GSBRNA2T00068566001	BnaA09g10210D	GSBRNA2G00068566001	GSBRNA2G00068566001	chrA09:5224630-5229616	UP	PC20	OK	1.15157	6.0387	2.39064	3.3731	5e-05	0.00315052	yes
GSBRNA2T00006014001	BnaAnng03040D	GSBRNA2G00006014001	GSBRNA2G00006014001	chrAnn_random:2447363-2450653	UP	PC20	OK	1.54398	8.10175	2.39158	3.1891	0.0002	0.0102143	yes
GSBRNA2T00066084001	BnaA02g36030D	GSBRNA2G00066084001	GSBRNA2G00066084001	chrA02_random:666513-667522	UP	PC20	OK	32.9628	173.465	2.39573	3.47466	0.0002	0.0102143	yes
GSBRNA2T00136878001	BnaC08g36840D	GSBRNA2G00136878001	GSBRNA2G00136878001	chrC08:33903716-33907885	UP	PC20	OK	2.39047	12.6302	2.40151	3.24832	5e-05	0.00315052	yes
GSBRNA2T00075051001	BnaA04g10500D	GSBRNA2G00075051001	GSBRNA2G00075051001	chrA04:9234191-9237186	UP	PC20	OK	5.85604	31.0235	2.40536	3.89954	5e-05	0.00315052	yes
GSBRNA2T00144593001	BnaA06g31630D	GSBRNA2G00144593001	GSBRNA2G00144593001	chrA06:21199458-21200550	UP	PC20	OK	6.56415	34.9618	2.4131	3.72902	5e-05	0.00315052	yes
GSBRNA2T00034550001	BnaAnng17960D	GSBRNA2G00034550001	GSBRNA2G00034550001	chrAnn_random:18867356-18871014	UP	PC20	OK	0.699381	3.73242	2.41596	3.11353	0.00015	0.00807736	yes
GSBRNA2T00029484001	BnaA05g19210D	GSBRNA2G00029484001	GSBRNA2G00029484001	chrA05:14506315-14509076	UP	PC20	OK	1.96965	10.5791	2.4252	3.47815	5e-05	0.00315052	yes
GSBRNA2T00102486001	BnaA07g29470D	GSBRNA2G00102486001	GSBRNA2G00102486001	chrA07:21091604-21093555	UP	PC20	OK	20.6541	111.388	2.4311	3.91553	5e-05	0.00315052	yes
GSBRNA2T00074879001	BnaA10g08320D	GSBRNA2G00074879001	GSBRNA2G00074879001	chrA10:7104707-7106141	UP	PC20	OK	14.486	78.475	2.43757	3.85622	5e-05	0.00315052	yes
GSBRNA2T00060745001	BnaC03g13310D	GSBRNA2G00060745001	GSBRNA2G00060745001	chrC03:6446695-6449759	UP	PC20	OK	3.74158	20.2914	2.43915	3.67733	5e-05	0.00315052	yes
GSBRNA2T00003072001	BnaA10g11710D	GSBRNA2G00003072001	GSBRNA2G00003072001	chrA10:9827180-9829042	UP	PC20	OK	1.59902	8.69148	2.44242	2.94829	0.00115	0.0413608	yes
GSBRNA2T00116010001	BnaC01g17060D	GSBRNA2G00116010001	GSBRNA2G00116010001	chrC01:11677579-11679172	UP	PC20	OK	2.33763	12.7282	2.4449	3.37162	0.0001	0.00574178	yes
GSBRNA2T00095175001	BnaA05g10680D	GSBRNA2G00095175001	GSBRNA2G00095175001	chrA05:5831298-5834949	UP	PC20	OK	4.24042	23.0965	2.4454	4.12883	5e-05	0.00315052	yes
GSBRNA2T00079131001	BnaC03g21390D	GSBRNA2G00079131001	GSBRNA2G00079131001	chrC03:11555612-11557663	UP	PC20	OK	1.73677	9.50908	2.4529	3.13833	0.00025	0.0123267	yes
GSBRNA2T00152962001	BnaC02g15950D	GSBRNA2G00152962001	GSBRNA2G00152962001	chrC02:11600160-11603654	UP	PC20	OK	0.728188	3.99856	2.4571	3.02203	0.0003	0.014397	yes
GSBRNA2T00081968001	BnaAnng29030D	GSBRNA2G00081968001	GSBRNA2G00081968001	chrAnn_random:33214618-33215637	UP	PC20	OK	36.244	199.026	2.45714	3.46223	0.0001	0.00574178	yes
GSBRNA2T00041259001	BnaAnng19370D	GSBRNA2G00041259001	GSBRNA2G00041259001	chrAnn_random:20952150-20953388	UP	PC20	OK	1.69793	9.34527	2.46046	2.96369	0.00055	0.0233056	yes
GSBRNA2T00013603001	BnaCnng26490D	GSBRNA2G00013603001	GSBRNA2G00013603001	chrCnn_random:24966270-24967539	UP	PC20	OK	2.88466	16.0035	2.47191	3.4042	5e-05	0.00315052	yes
GSBRNA2T00151221001	BnaA03g41960D	GSBRNA2G00151221001	GSBRNA2G00151221001	chrA03:21074015-21079798	UP	PC20	OK	9.97566	55.3472	2.47203	3.27945	0.0001	0.00574178	yes
GSBRNA2T00075848001	BnaA03g11700D	GSBRNA2G00075848001	GSBRNA2G00075848001	chrA03:5260774-5264151	UP	PC20	OK	3.80061	21.0917	2.47237	3.67637	5e-05	0.00315052	yes
GSBRNA2T00052216001	BnaAnng21760D	GSBRNA2G00052216001	GSBRNA2G00052216001	chrAnn_random:24185721-24188357	UP	PC20	OK	10.4911	58.3985	2.47677	4.18843	5e-05	0.00315052	yes
GSBRNA2T00082174001	BnaCnng12640D	GSBRNA2G00082174001	GSBRNA2G00082174001	chrCnn_random:11838741-11842019	UP	PC20	OK	33.0236	184.142	2.47925	3.18198	5e-05	0.00315052	yes
GSBRNA2T00063713001	BnaA09g08470D	GSBRNA2G00063713001	GSBRNA2G00063713001	chrA09:4182304-4184997	UP	PC20	OK	1.807	10.1136	2.48463	3.3853	0.0001	0.00574178	yes
GSBRNA2T00032751001	BnaC09g11360D	GSBRNA2G00032751001	GSBRNA2G00032751001	chrC09:7929484-7936144	UP	PC20	OK	1.66006	9.32545	2.48994	3.70019	5e-05	0.00315052	yes
GSBRNA2T00078252001	BnaA09g43130D	GSBRNA2G00078252001	GSBRNA2G00078252001	chrA09:29951486-29954002	UP	PC20	OK	4.12306	23.1639	2.49009	3.93622	5e-05	0.00315052	yes
GSBRNA2T00037052001	BnaA09g36180D	GSBRNA2G00037052001	GSBRNA2G00037052001	chrA09:26247545-26248525	UP	PC20	OK	4.35086	24.5913	2.49878	3.35251	5e-05	0.00315052	yes
GSBRNA2T00137580001	BnaA03g33790D	GSBRNA2G00137580001	GSBRNA2G00137580001	chrA03:16358257-16359218	UP	PC20	OK	13.1973	74.6854	2.50059	3.74632	5e-05	0.00315052	yes
GSBRNA2T00019720001	BnaA03g55860D	GSBRNA2G00019720001	GSBRNA2G00019720001	chrA03_random:445806-451618	UP	PC20	OK	1.62768	9.24965	2.50658	3.77864	5e-05	0.00315052	yes
GSBRNA2T00057367001	BnaA09g41810D	GSBRNA2G00057367001	GSBRNA2G00057367001	chrA09:29137230-29138857	UP	PC20	OK	9.56217	54.4282	2.50894	3.56144	5e-05	0.00315052	yes
GSBRNA2T00152260001	BnaC09g26890D	GSBRNA2G00152260001	GSBRNA2G00152260001	chrC09:28175232-28176553	UP	PC20	OK	2.87308	16.4344	2.51605	3.13683	0.0006	0.0251389	yes
GSBRNA2T00141972001	BnaA03g15380D	GSBRNA2G00141972001	GSBRNA2G00141972001	chrA03:7139281-7141488	UP	PC20	OK	0.871275	5.01628	2.52542	2.96751	0.00035	0.0162035	yes
GSBRNA2T00117902001	BnaC06g26190D	GSBRNA2G00117902001	GSBRNA2G00117902001	chrC06:27891316-27895515	UP	PC20	OK	1.36531	7.86066	2.52542	3.69137	5e-05	0.00315052	yes
GSBRNA2T00140791001	BnaC03g09740D	GSBRNA2G00140791001	GSBRNA2G00140791001	chrC03:4686940-4689410	UP	PC20	OK	11.5537	67.0331	2.53652	3.70039	5e-05	0.00315052	yes
GSBRNA2T00142513001	BnaC07g08430D	GSBRNA2G00142513001	GSBRNA2G00142513001	chrC07:13365952-13366512	UP	PC20	OK	8.93367	52.0579	2.54279	3.21827	0.0001	0.00574178	yes
GSBRNA2T00041374001	BnaCnng06220D	GSBRNA2G00041374001	GSBRNA2G00041374001	chrCnn_random:5572575-5576011	UP	PC20	OK	1.6921	9.89083	2.54727	3.49835	5e-05	0.00315052	yes
GSBRNA2T00051878001	BnaC01g36720D	GSBRNA2G00051878001	GSBRNA2G00051878001	chrC01:35924261-35927605	UP	PC20	OK	1.29526	7.5902	2.55089	3.74537	5e-05	0.00315052	yes
GSBRNA2T00076684001	BnaAnng07270D	GSBRNA2G00076684001	GSBRNA2G00076684001	chrAnn_random:7144690-7148827	UP	PC20	OK	0.891307	5.25221	2.55893	3.66614	5e-05	0.00315052	yes
GSBRNA2T00138746001	BnaA03g23010D	GSBRNA2G00138746001	GSBRNA2G00138746001	chrA03:10973596-10975155	UP	PC20	OK	7.00516	41.7052	2.57374	4.08442	5e-05	0.00315052	yes
GSBRNA2T00146496001	BnaA07g33690D	GSBRNA2G00146496001	GSBRNA2G00146496001	chrA07:23045204-23047394	UP	PC20	OK	1.98623	11.8485	2.5766	3.26879	0.00025	0.0123267	yes
GSBRNA2T00130380001	BnaC01g07540D	GSBRNA2G00130380001	GSBRNA2G00130380001	chrC01:3948709-3950523	UP	PC20	OK	2.27315	13.599	2.58074	3.39466	0.00025	0.0123267	yes
GSBRNA2T00039950001	BnaA01g06270D	GSBRNA2G00039950001	GSBRNA2G00039950001	chrA01:2902452-2904349	UP	PC20	OK	2.60964	15.6828	2.58726	3.44219	5e-05	0.00315052	yes
GSBRNA2T00047504001	BnaA02g34140D	GSBRNA2G00047504001	GSBRNA2G00047504001	chrA02:24419465-24419985	UP	PC20	OK	13.9735	84.1831	2.59083	3.99041	5e-05	0.00315052	yes
GSBRNA2T00089162001	BnaA05g10700D	GSBRNA2G00089162001	GSBRNA2G00089162001	chrA05:5844993-5845756	UP	PC20	OK	9.19825	55.511	2.59334	3.44136	5e-05	0.00315052	yes
GSBRNA2T00000566001	BnaC03g54940D	GSBRNA2G00000566001	GSBRNA2G00000566001	chrC03:43284668-43285508	UP	PC20	OK	3.01799	18.2511	2.59632	3.07987	0.00015	0.00807736	yes
GSBRNA2T00142236001	BnaC05g21480D	GSBRNA2G00142236001	GSBRNA2G00142236001	chrC05:15206539-15207473	UP	PC20	OK	2.36675	14.4295	2.60805	3.03824	0.00025	0.0123267	yes
GSBRNA2T00059074001	BnaC02g09390D	GSBRNA2G00059074001	GSBRNA2G00059074001	chrC02:5168957-5169874	UP	PC20	OK	1.18368	7.22081	2.60888	2.76033	0.00145	0.0490936	yes
GSBRNA2T00109745001	BnaA06g21090D	GSBRNA2G00109745001	GSBRNA2G00109745001	chrA06:14651354-14653360	UP	PC20	OK	8.91887	54.4506	2.61001	4.325	5e-05	0.00315052	yes
GSBRNA2T00034574001	BnaC07g49750D	GSBRNA2G00034574001	GSBRNA2G00034574001	chrC07_random:2175682-2177797	UP	PC20	OK	1.95815	11.9749	2.61245	3.70511	5e-05	0.00315052	yes
GSBRNA2T00094996001	BnaA08g03920D	GSBRNA2G00094996001	GSBRNA2G00094996001	chrA08:3231532-3233325	UP	PC20	OK	3.47264	21.2552	2.61371	3.91363	5e-05	0.00315052	yes
GSBRNA2T00056385001	BnaA01g14490D	GSBRNA2G00056385001	GSBRNA2G00056385001	chrA01:7306476-7308003	UP	PC20	OK	2.15383	13.221	2.61785	3.46221	0.00025	0.0123267	yes
GSBRNA2T00059172001	BnaC03g58590D	GSBRNA2G00059172001	GSBRNA2G00059172001	chrC03:47884308-47887895	UP	PC20	OK	0.520965	3.20483	2.62099	2.93522	0.0012	0.0424975	yes
GSBRNA2T00103209001	BnaC06g32670D	GSBRNA2G00103209001	GSBRNA2G00103209001	chrC06:32786064-32788006	UP	PC20	OK	7.96211	49.2735	2.62959	4.41623	5e-05	0.00315052	yes
GSBRNA2T00025015001	BnaC07g49810D	GSBRNA2G00025015001	GSBRNA2G00025015001	chrC07_random:2209614-2216181	UP	PC20	OK	0.346436	2.15326	2.63586	3.181	0.0003	0.014397	yes
GSBRNA2T00090171001	BnaC02g34540D	GSBRNA2G00090171001	GSBRNA2G00090171001	chrC02:37121418-37124000	UP	PC20	OK	1.09743	6.86841	2.64585	2.90602	0.0008	0.0311762	yes
GSBRNA2T00009921001	BnaA01g29290D	GSBRNA2G00009921001	GSBRNA2G00009921001	chrA01:20229660-20232769	UP	PC20	OK	0.647714	4.05438	2.64605	3.20955	0.0003	0.014397	yes
GSBRNA2T00090867001	BnaA02g11430D	GSBRNA2G00090867001	GSBRNA2G00090867001	chrA02:5995398-5998478	UP	PC20	OK	0.901604	5.64579	2.64661	3.32596	0.0003	0.014397	yes
GSBRNA2T00133177001	BnaC09g35160D	GSBRNA2G00133177001	GSBRNA2G00133177001	chrC09:38588255-38588781	UP	PC20	OK	11.6182	72.7842	2.64724	3.8749	5e-05	0.00315052	yes
GSBRNA2T00146497001	BnaA07g33680D	GSBRNA2G00146497001	GSBRNA2G00146497001	chrA07:23043876-23044951	UP	PC20	OK	3.19967	20.1132	2.65214	3.29314	0.00035	0.0162035	yes
GSBRNA2T00154693001	BnaC07g41150D	GSBRNA2G00154693001	GSBRNA2G00154693001	chrC07:41127461-41131252	UP	PC20	OK	0.496561	3.13201	2.65705	2.75387	0.00075	0.0297778	yes
GSBRNA2T00026919001	BnaC05g32670D	GSBRNA2G00026919001	GSBRNA2G00026919001	chrC05:32183880-32185027	UP	PC20	OK	2.31761	14.6326	2.65848	3.20123	0.00015	0.00807736	yes
GSBRNA2T00144142001	BnaC03g56180D	GSBRNA2G00144142001	GSBRNA2G00144142001	chrC03:45519111-45521089	UP	PC20	OK	1.05163	6.63989	2.65854	3.2689	0.0004	0.0180197	yes
GSBRNA2T00096312001	BnaAnng32610D	GSBRNA2G00096312001	GSBRNA2G00096312001	chrAnn_random:37214973-37217602	UP	PC20	OK	1.71223	10.8178	2.65946	2.92364	0.0008	0.0311762	yes
GSBRNA2T00003230001	BnaCnng20740D	GSBRNA2G00003230001	GSBRNA2G00003230001	chrCnn_random:19445798-19447307	UP	PC20	OK	0.734257	4.66564	2.66772	2.77441	0.0014	0.0478684	yes
GSBRNA2T00035639001	BnaA06g12890D	GSBRNA2G00035639001	GSBRNA2G00035639001	chrA06:6755498-6756866	UP	PC20	OK	2.22036	14.1457	2.6715	3.63139	5e-05	0.00315052	yes
GSBRNA2T00145376001	BnaC08g00120D	GSBRNA2G00145376001	GSBRNA2G00145376001	chrC08:49305-53872	UP	PC20	OK	1.36379	8.72147	2.67695	3.90455	5e-05	0.00315052	yes
GSBRNA2T00124625001	BnaC06g15040D	GSBRNA2G00124625001	GSBRNA2G00124625001	chrC06:17769645-17772312	UP	PC20	OK	1.50776	9.64812	2.67784	3.46109	5e-05	0.00315052	yes
GSBRNA2T00089013001	BnaA04g15600D	GSBRNA2G00089013001	GSBRNA2G00089013001	chrA04:12903788-12904829	UP	PC20	OK	14.672	93.9713	2.67916	4.37857	5e-05	0.00315052	yes
GSBRNA2T00123798001	BnaC03g39170D	GSBRNA2G00123798001	GSBRNA2G00123798001	chrC03:24167654-24169149	UP	PC20	OK	3.53385	22.6474	2.68003	3.8576	5e-05	0.00315052	yes
GSBRNA2T00139858001	BnaC08g16080D	GSBRNA2G00139858001	GSBRNA2G00139858001	chrC08:20257415-20259058	UP	PC20	OK	5.82826	37.4	2.6819	4.13268	5e-05	0.00315052	yes
GSBRNA2T00121042001	BnaA01g05060D	GSBRNA2G00121042001	GSBRNA2G00121042001	chrA01:2371396-2372853	UP	PC20	OK	3.28528	21.1015	2.68326	3.50207	5e-05	0.00315052	yes
GSBRNA2T00124454001	BnaA07g25350D	GSBRNA2G00124454001	GSBRNA2G00124454001	chrA07:18878319-18883851	UP	PC20	OK	1.93258	12.4252	2.68467	3.8155	5e-05	0.00315052	yes
GSBRNA2T00114273001	BnaA04g09680D	GSBRNA2G00114273001	GSBRNA2G00114273001	chrA04:8688664-8690223	UP	PC20	OK	1.57595	10.2797	2.7055	3.15898	0.0008	0.0311762	yes
GSBRNA2T00099817001	BnaC07g43490D	GSBRNA2G00099817001	GSBRNA2G00099817001	chrC07:42526219-42527527	UP	PC20	OK	4.70911	31.0262	2.71996	3.58291	5e-05	0.00315052	yes
GSBRNA2T00126784001	BnaA08g10090D	GSBRNA2G00126784001	GSBRNA2G00126784001	chrA08:9443131-9448772	UP	PC20	OK	0.623941	4.14108	2.73053	3.03903	0.0008	0.0311762	yes
GSBRNA2T00067421001	BnaA03g50170D	GSBRNA2G00067421001	GSBRNA2G00067421001	chrA03:26032819-26034296	UP	PC20	OK	6.41029	42.5683	2.73132	4.39807	5e-05	0.00315052	yes
GSBRNA2T00150246001	BnaA10g02860D	GSBRNA2G00150246001	GSBRNA2G00150246001	chrA10:1480358-1483999	UP	PC20	OK	0.809681	5.38882	2.73454	3.63747	5e-05	0.00315052	yes
GSBRNA2T00056416001	BnaA09g11080D	GSBRNA2G00056416001	GSBRNA2G00056416001	chrA09:5704449-5711109	UP	PC20	OK	1.18904	7.99819	2.74987	3.89899	5e-05	0.00315052	yes
GSBRNA2T00148642001	BnaA03g10420D	GSBRNA2G00148642001	GSBRNA2G00148642001	chrA03:4688135-4690485	UP	PC20	OK	2.06568	13.8973	2.75012	3.96751	5e-05	0.00315052	yes
GSBRNA2T00107254001	BnaA06g17960D	GSBRNA2G00107254001	GSBRNA2G00107254001	chrA06:10238137-10239776	UP	PC20	OK	1.70772	11.4981	2.75125	3.6397	5e-05	0.00315052	yes
GSBRNA2T00088436001	BnaAnng09500D	GSBRNA2G00088436001	GSBRNA2G00088436001	chrAnn_random:10010549-10011457	UP	PC20	OK	21.9039	149.057	2.76661	4.24531	5e-05	0.00315052	yes
GSBRNA2T00147809001	BnaC06g37510D	GSBRNA2G00147809001	GSBRNA2G00147809001	chrC06:35503145-35505533	UP	PC20	OK	1.12649	7.68344	2.76992	2.97286	0.00105	0.0384482	yes
GSBRNA2T00087630001	BnaA08g07360D	GSBRNA2G00087630001	GSBRNA2G00087630001	chrA08:7384877-7387112	UP	PC20	OK	8.91237	61.8257	2.79432	4.10001	5e-05	0.00315052	yes
GSBRNA2T00060441001	BnaC04g32950D	GSBRNA2G00060441001	GSBRNA2G00060441001	chrC04:34643698-34646031	UP	PC20	OK	1.25687	8.77309	2.80325	3.57299	5e-05	0.00315052	yes
GSBRNA2T00063754001	BnaCnng08080D	GSBRNA2G00063754001	GSBRNA2G00063754001	chrCnn_random:7469653-7473057	UP	PC20	OK	5.66101	39.7585	2.81213	4.35931	5e-05	0.00315052	yes
GSBRNA2T00014569001	BnaAnng37270D	GSBRNA2G00014569001	GSBRNA2G00014569001	chrAnn_random:42243549-42244305	UP	PC20	OK	5.54855	39.0695	2.81586	3.93953	5e-05	0.00315052	yes
GSBRNA2T00155905001	BnaC08g27710D	GSBRNA2G00155905001	GSBRNA2G00155905001	chrC08:28611161-28612025	UP	PC20	OK	2.77255	19.5528	2.81809	3.3709	0.0003	0.014397	yes
GSBRNA2T00049947001	BnaC06g13430D	GSBRNA2G00049947001	GSBRNA2G00049947001	chrC06:16154369-16156908	UP	PC20	OK	0.899314	6.37337	2.82516	3.09015	0.00135	0.0467852	yes
GSBRNA2T00047657001	BnaC03g63960D	GSBRNA2G00047657001	GSBRNA2G00047657001	chrC03:53450631-53452738	UP	PC20	OK	6.07813	43.1001	2.82599	4.39543	5e-05	0.00315052	yes
GSBRNA2T00146315001	BnaA07g35260D	GSBRNA2G00146315001	GSBRNA2G00146315001	chrA07:23762738-23764579	UP	PC20	OK	4.40446	31.4724	2.83705	3.86026	5e-05	0.00315052	yes
GSBRNA2T00023444001	BnaA02g16460D	GSBRNA2G00023444001	GSBRNA2G00023444001	chrA02:9798811-9799775	UP	PC20	OK	22.418	160.532	2.84013	4.69687	5e-05	0.00315052	yes
GSBRNA2T00118778001	BnaA07g14070D	GSBRNA2G00118778001	GSBRNA2G00118778001	chrA07:12494498-12496152	UP	PC20	OK	1.92419	13.8127	2.84367	3.13166	0.00045	0.0198844	yes
GSBRNA2T00106108001	BnaC05g38940D	GSBRNA2G00106108001	GSBRNA2G00106108001	chrC05:37493099-37504117	UP	PC20	OK	11.1123	80.0543	2.84882	2.94279	0.00015	0.00807736	yes
GSBRNA2T00122954001	BnaA10g05260D	GSBRNA2G00122954001	GSBRNA2G00122954001	chrA10:3001257-3005403	UP	PC20	OK	2.49128	18.0172	2.85442	4.16921	5e-05	0.00315052	yes
GSBRNA2T00061593001	BnaC08g08210D	GSBRNA2G00061593001	GSBRNA2G00061593001	chrC08:12194225-12196714	UP	PC20	OK	10.3574	75.2873	2.86174	4.15182	5e-05	0.00315052	yes
GSBRNA2T00122822001	BnaA10g04370D	GSBRNA2G00122822001	GSBRNA2G00122822001	chrA10:2298603-2301709	UP	PC20	OK	3.99541	29.0445	2.86185	4.05602	5e-05	0.00315052	yes
GSBRNA2T00127643001	BnaC04g38620D	GSBRNA2G00127643001	GSBRNA2G00127643001	chrC04:39815361-39816307	UP	PC20	OK	8.87371	65.0723	2.87444	4.40541	5e-05	0.00315052	yes
GSBRNA2T00110234001	BnaA10g07620D	GSBRNA2G00110234001	GSBRNA2G00110234001	chrA10:6103807-6104729	UP	PC20	OK	3.69963	27.6203	2.90027	4.08141	5e-05	0.00315052	yes
GSBRNA2T00053011001	BnaC09g33280D	GSBRNA2G00053011001	GSBRNA2G00053011001	chrC09:36436819-36439515	UP	PC20	OK	2.27109	17.0759	2.9105	3.78395	5e-05	0.00315052	yes
GSBRNA2T00034336001	BnaA04g27560D	GSBRNA2G00034336001	GSBRNA2G00034336001	chrA04_random:158321-159423	UP	PC20	OK	2.45754	18.4889	2.91137	3.58581	0.00015	0.00807736	yes
GSBRNA2T00112208001	BnaA03g26600D	GSBRNA2G00112208001	GSBRNA2G00112208001	chrA03:13046696-13047077	UP	PC20	OK	6.83531	51.4276	2.91146	3.1853	0.00055	0.0233056	yes
GSBRNA2T00009522001	BnaA09g04280D	GSBRNA2G00009522001	GSBRNA2G00009522001	chrA09:2110500-2112608	UP	PC20	OK	1.21644	9.16074	2.91279	3.35876	0.0004	0.0180197	yes
GSBRNA2T00097429001	BnaAnng10520D	GSBRNA2G00097429001	GSBRNA2G00097429001	chrAnn_random:11460953-11463020	UP	PC20	OK	0.778171	5.89604	2.92159	3.25363	0.0008	0.0311762	yes
GSBRNA2T00009231001	BnaA05g19820D	GSBRNA2G00009231001	GSBRNA2G00009231001	chrA05:15246117-15249389	UP	PC20	OK	0.839287	6.38189	2.92675	3.56993	0.0001	0.00574178	yes
GSBRNA2T00102983001	BnaA08g23020D	GSBRNA2G00102983001	GSBRNA2G00102983001	chrA08:16541254-16542040	UP	PC20	OK	1.93602	14.7458	2.92914	3.20483	0.0007	0.0284206	yes
GSBRNA2T00098666001	BnaA07g15770D	GSBRNA2G00098666001	GSBRNA2G00098666001	chrA07:13544403-13545742	UP	PC20	OK	6.90314	52.8929	2.93775	4.19973	5e-05	0.00315052	yes
GSBRNA2T00076127001	BnaA05g32340D	GSBRNA2G00076127001	GSBRNA2G00076127001	chrA05:22135673-22138998	UP	PC20	OK	1.14394	8.81843	2.94652	3.77626	5e-05	0.00315052	yes
GSBRNA2T00024705001	BnaC03g57350D	GSBRNA2G00024705001	GSBRNA2G00024705001	chrC03:46749346-46750239	UP	PC20	OK	1.61644	12.4624	2.94669	3.03704	0.001	0.0370366	yes
GSBRNA2T00156168001	BnaA06g05490D	GSBRNA2G00156168001	GSBRNA2G00156168001	chrA06:3112735-3113742	UP	PC20	OK	4.08755	31.634	2.95217	4.26011	5e-05	0.00315052	yes
GSBRNA2T00075652001	BnaC05g47350D	GSBRNA2G00075652001	GSBRNA2G00075652001	chrC05:42370882-42374401	UP	PC20	OK	1.47171	11.5368	2.97068	3.49366	5e-05	0.00315052	yes
GSBRNA2T00010144001	BnaC09g30100D	GSBRNA2G00010144001	GSBRNA2G00010144001	chrC09:32879994-32881159	UP	PC20	OK	3.60341	28.6267	2.98993	3.68038	5e-05	0.00315052	yes
GSBRNA2T00102946001	BnaA08g22720D	GSBRNA2G00102946001	GSBRNA2G00102946001	chrA08:16419594-16420357	UP	PC20	OK	5.39991	43.4506	3.00837	3.79308	5e-05	0.00315052	yes
GSBRNA2T00028728001	BnaC03g22390D	GSBRNA2G00028728001	GSBRNA2G00028728001	chrC03:12284160-12285547	UP	PC20	OK	1.97222	15.9193	3.01288	4.04497	5e-05	0.00315052	yes
GSBRNA2T00137371001	BnaA03g35520D	GSBRNA2G00137371001	GSBRNA2G00137371001	chrA03:17345517-17348242	UP	PC20	OK	4.80461	38.9489	3.01909	4.69083	5e-05	0.00315052	yes
GSBRNA2T00021754001	BnaA04g05470D	GSBRNA2G00021754001	GSBRNA2G00021754001	chrA04:4244816-4246287	UP	PC20	OK	1.8904	15.3914	3.02536	3.52326	0.00045	0.0198844	yes
GSBRNA2T00101528001	BnaC03g25270D	GSBRNA2G00101528001	GSBRNA2G00101528001	chrC03:14200552-14201860	UP	PC20	OK	0.861121	7.03194	3.02963	3.20684	0.00035	0.0162035	yes
GSBRNA2T00047637001	BnaA07g03490D	GSBRNA2G00047637001	GSBRNA2G00047637001	chrA07:3122759-3126561	UP	PC20	OK	0.422433	3.46525	3.03616	3.26812	0.00045	0.0198844	yes
GSBRNA2T00049502001	BnaA09g40020D	GSBRNA2G00049502001	GSBRNA2G00049502001	chrA09:28207712-28209428	UP	PC20	OK	2.92023	23.9756	3.03742	4.31402	5e-05	0.00315052	yes
GSBRNA2T00087127001	BnaA06g38950D	GSBRNA2G00087127001	GSBRNA2G00087127001	chrA06_random:1037202-1038178	UP	PC20	OK	5.933	49.9025	3.07228	4.29043	5e-05	0.00315052	yes
GSBRNA2T00139534001	BnaC08g18580D	GSBRNA2G00139534001	GSBRNA2G00139534001	chrC08:21678867-21682369	UP	PC20	OK	0.574011	4.85211	3.07946	3.6673	5e-05	0.00315052	yes
GSBRNA2T00026392001	BnaC03g42260D	GSBRNA2G00026392001	GSBRNA2G00026392001	chrC03:27048428-27050334	UP	PC20	OK	6.16566	52.5825	3.09226	4.61865	5e-05	0.00315052	yes
GSBRNA2T00060115001	BnaC06g27490D	GSBRNA2G00060115001	GSBRNA2G00060115001	chrC06:28788585-28789842	UP	PC20	OK	1.85747	16.042	3.11044	4.08046	5e-05	0.00315052	yes
GSBRNA2T00066946001	BnaCnng56620D	GSBRNA2G00066946001	GSBRNA2G00066946001	chrCnn_random:56492498-56493752	UP	PC20	OK	4.04988	35.1561	3.11782	4.52396	5e-05	0.00315052	yes
GSBRNA2T00056151001	BnaA02g28700D	GSBRNA2G00056151001	GSBRNA2G00056151001	chrA02:21085844-21087849	UP	PC20	OK	3.30031	28.7542	3.1231	4.05615	5e-05	0.00315052	yes
GSBRNA2T00063601001	BnaA07g37360D	GSBRNA2G00063601001	GSBRNA2G00063601001	chrA07_random:1045960-1047188	UP	PC20	OK	3.48962	30.4526	3.12542	4.40164	5e-05	0.00315052	yes
GSBRNA2T00144813001	BnaC07g05090D	GSBRNA2G00144813001	GSBRNA2G00144813001	chrC07:8124938-8127124	UP	PC20	OK	1.68133	14.9706	3.15446	4.5631	5e-05	0.00315052	yes
GSBRNA2T00031184001	BnaC05g23490D	GSBRNA2G00031184001	GSBRNA2G00031184001	chrC05:17582274-17584181	UP	PC20	OK	1.29617	11.5496	3.15551	3.87445	0.00015	0.00807736	yes
GSBRNA2T00087884001	BnaC04g23900D	GSBRNA2G00087884001	GSBRNA2G00087884001	chrC04:24993779-24995144	UP	PC20	OK	1.8749	16.7265	3.15725	4.23502	5e-05	0.00315052	yes
GSBRNA2T00093711001	BnaA10g11500D	GSBRNA2G00093711001	GSBRNA2G00093711001	chrA10:9656812-9657931	UP	PC20	OK	2.26589	20.2335	3.15859	3.91441	5e-05	0.00315052	yes
GSBRNA2T00126240001	BnaA04g02800D	GSBRNA2G00126240001	GSBRNA2G00126240001	chrA04:1875582-1876284	UP	PC20	OK	3.35184	29.9315	3.15864	3.77072	5e-05	0.00315052	yes
GSBRNA2T00111939001	BnaA03g28700D	GSBRNA2G00111939001	GSBRNA2G00111939001	chrA03:13988824-13990887	UP	PC20	OK	1.19968	10.7791	3.16751	3.46416	0.00025	0.0123267	yes
GSBRNA2T00003111001	BnaCnng20480D	GSBRNA2G00003111001	GSBRNA2G00003111001	chrCnn_random:19243227-19245726	UP	PC20	OK	1.76587	15.8901	3.16968	4.7994	5e-05	0.00315052	yes
GSBRNA2T00073863001	BnaC05g47160D	GSBRNA2G00073863001	GSBRNA2G00073863001	chrC05:42289742-42291766	UP	PC20	OK	1.72292	15.6588	3.18404	3.95242	5e-05	0.00315052	yes
GSBRNA2T00101740001	BnaC05g35510D	GSBRNA2G00101740001	GSBRNA2G00101740001	chrC05:34873172-34878384	UP	PC20	OK	2.68144	24.6758	3.20201	4.86256	5e-05	0.00315052	yes
GSBRNA2T00055882001	BnaC03g27970D	GSBRNA2G00055882001	GSBRNA2G00055882001	chrC03:16339160-16341317	UP	PC20	OK	2.45124	22.6569	3.20837	4.62699	5e-05	0.00315052	yes
GSBRNA2T00121425001	BnaA01g01750D	GSBRNA2G00121425001	GSBRNA2G00121425001	chrA01:912922-924258	UP	PC20	OK	1.1662	10.8368	3.21604	4.47611	5e-05	0.00315052	yes
GSBRNA2T00154770001	BnaA03g36390D	GSBRNA2G00154770001	GSBRNA2G00154770001	chrA03:17814355-17816156	UP	PC20	OK	7.14812	67.6082	3.24156	4.89525	5e-05	0.00315052	yes
GSBRNA2T00100106001	BnaC07g45900D	GSBRNA2G00100106001	GSBRNA2G00100106001	chrC07:43721409-43725880	UP	PC20	OK	1.72914	16.3607	3.24211	4.46559	5e-05	0.00315052	yes
GSBRNA2T00101008001	BnaC04g28220D	GSBRNA2G00101008001	GSBRNA2G00101008001	chrC04:29682847-29683475	UP	PC20	OK	4.03865	38.2687	3.24422	3.79255	0.0001	0.00574178	yes
GSBRNA2T00141024001	BnaC03g11570D	GSBRNA2G00141024001	GSBRNA2G00141024001	chrC03:5629712-5630189	UP	PC20	OK	4.27775	40.5517	3.24484	3.25137	0.00105	0.0384482	yes
GSBRNA2T00148137001	BnaC06g40170D	GSBRNA2G00148137001	GSBRNA2G00148137001	chrC06:36908724-36910577	UP	PC20	OK	5.50056	52.2402	3.24751	4.35373	5e-05	0.00315052	yes
GSBRNA2T00093341001	BnaAnng31880D	GSBRNA2G00093341001	GSBRNA2G00093341001	chrAnn_random:36440984-36442424	UP	PC20	OK	2.13283	20.3135	3.2516	4.21265	0.0001	0.00574178	yes
GSBRNA2T00045306001	BnaC03g73930D	GSBRNA2G00045306001	GSBRNA2G00045306001	chrC03_random:1920759-1921566	UP	PC20	OK	2.9113	28.0156	3.26649	3.95756	5e-05	0.00315052	yes
GSBRNA2T00038568001	BnaA05g31720D	GSBRNA2G00038568001	GSBRNA2G00038568001	chrA05:21872670-21874177	UP	PC20	OK	1.92964	18.7575	3.28106	3.69419	5e-05	0.00315052	yes
GSBRNA2T00102200001	BnaA07g25880D	GSBRNA2G00102200001	GSBRNA2G00102200001	chrA07:19119390-19120686	UP	PC20	OK	2.72733	26.7057	3.29158	4.789	5e-05	0.00315052	yes
GSBRNA2T00013694001	BnaAnng36730D	GSBRNA2G00013694001	GSBRNA2G00013694001	chrAnn_random:41694432-41696063	UP	PC20	OK	4.91571	48.4615	3.30137	5.00007	5e-05	0.00315052	yes
GSBRNA2T00124689001	BnaC06g14690D	GSBRNA2G00124689001	GSBRNA2G00124689001	chrC06:17442236-17443353	UP	PC20	OK	10.6266	104.955	3.30402	4.85836	5e-05	0.00315052	yes
GSBRNA2T00017317001	BnaA03g55320D	GSBRNA2G00017317001	GSBRNA2G00017317001	chrA03_random:251175-251883	UP	PC20	OK	10.9618	109.608	3.32179	4.72428	5e-05	0.00315052	yes
GSBRNA2T00090674001	BnaA09g29520D	GSBRNA2G00090674001	GSBRNA2G00090674001	chrA09:22102586-22106808	UP	PC20	OK	2.49484	25.2675	3.34026	4.7923	5e-05	0.00315052	yes
GSBRNA2T00127182001	BnaC08g32840D	GSBRNA2G00127182001	GSBRNA2G00127182001	chrC08:31616323-31618400	UP	PC20	OK	0.430904	4.38386	3.34676	3.2869	0.00075	0.0297778	yes
GSBRNA2T00085889001	BnaA09g27390D	GSBRNA2G00085889001	GSBRNA2G00085889001	chrA09:20547079-20549222	UP	PC20	OK	1.3123	13.5783	3.37114	3.32991	0.00065	0.0268169	yes
GSBRNA2T00123774001	BnaC03g39000D	GSBRNA2G00123774001	GSBRNA2G00123774001	chrC03:24045120-24046110	UP	PC20	OK	2.32732	24.1517	3.37538	3.94043	5e-05	0.00315052	yes
GSBRNA2T00090065001	BnaC04g15370D	GSBRNA2G00090065001	GSBRNA2G00090065001	chrC04:13147538-13148458	UP	PC20	OK	1.72178	17.8833	3.37664	3.76427	0.0002	0.0102143	yes
GSBRNA2T00045443001	BnaC09g47860D	GSBRNA2G00045443001	GSBRNA2G00045443001	chrC09:46983331-46985296	UP	PC20	OK	16.4671	172.115	3.38571	4.29606	5e-05	0.00315052	yes
GSBRNA2T00132968001	BnaA05g00800D	GSBRNA2G00132968001	GSBRNA2G00132968001	chrA05:467360-468011	UP	PC20	OK	33.9696	355.897	3.38914	4.7901	5e-05	0.00315052	yes
GSBRNA2T00007616001	BnaA04g10650D	GSBRNA2G00007616001	GSBRNA2G00007616001	chrA04:9350516-9352519	UP	PC20	OK	4.3204	45.4898	3.39631	4.99187	5e-05	0.00315052	yes
GSBRNA2T00078301001	BnaA09g43560D	GSBRNA2G00078301001	GSBRNA2G00078301001	chrA09:30140713-30141462	UP	PC20	OK	3.13721	33.1733	3.40247	3.81554	5e-05	0.00315052	yes
GSBRNA2T00153882001	BnaA05g22270D	GSBRNA2G00153882001	GSBRNA2G00153882001	chrA05:17024725-17030088	UP	PC20	OK	4.34635	46.1089	3.40717	4.94577	5e-05	0.00315052	yes
GSBRNA2T00031454001	BnaC07g33060D	GSBRNA2G00031454001	GSBRNA2G00031454001	chrC07:36390301-36396061	UP	PC20	OK	5.60429	59.5913	3.4105	4.10336	5e-05	0.00315052	yes
GSBRNA2T00105980001	BnaC06g17580D	GSBRNA2G00105980001	GSBRNA2G00105980001	chrC06:20172595-20175616	UP	PC20	OK	0.84021	8.99017	3.41953	3.96789	5e-05	0.00315052	yes
GSBRNA2T00141491001	BnaC03g51470D	GSBRNA2G00141491001	GSBRNA2G00141491001	chrC03:36041198-36046903	UP	PC20	OK	4.66171	49.9827	3.4225	4.75916	5e-05	0.00315052	yes
GSBRNA2T00010143001	BnaC09g30110D	GSBRNA2G00010143001	GSBRNA2G00010143001	chrC09:32881286-32882230	UP	PC20	OK	101.327	1094.91	3.43372	3.21075	0.0008	0.0311762	yes
GSBRNA2T00044564001	BnaC05g09910D	GSBRNA2G00044564001	GSBRNA2G00044564001	chrC05:5516925-5518912	UP	PC20	OK	1.62923	18.1411	3.477	4.27102	5e-05	0.00315052	yes
GSBRNA2T00150668001	BnaA08g18440D	GSBRNA2G00150668001	GSBRNA2G00150668001	chrA08:14431065-14431401	UP	PC20	OK	13.0012	145.71	3.48638	4.20567	5e-05	0.00315052	yes
GSBRNA2T00043765001	BnaC05g50160D	GSBRNA2G00043765001	GSBRNA2G00043765001	chrC05_random:820150-821543	UP	PC20	OK	1.04326	11.7107	3.48866	3.86834	5e-05	0.00315052	yes
GSBRNA2T00100773001	BnaC09g16820D	GSBRNA2G00100773001	GSBRNA2G00100773001	chrC09:13623919-13624524	UP	PC20	OK	1.66368	18.9606	3.51056	3.53077	0.00145	0.0490936	yes
GSBRNA2T00074261001	BnaCnng59120D	GSBRNA2G00074261001	GSBRNA2G00074261001	chrCnn_random:58787830-58790301	UP	PC20	OK	0.629019	7.18417	3.51365	4.01106	5e-05	0.00315052	yes
GSBRNA2T00116783001	BnaA05g05550D	GSBRNA2G00116783001	GSBRNA2G00116783001	chrA05:2903352-2908788	UP	PC20	OK	2.25149	25.8772	3.52273	4.91828	5e-05	0.00315052	yes
GSBRNA2T00102413001	BnaA07g28880D	GSBRNA2G00102413001	GSBRNA2G00102413001	chrA07:20806156-20806804	UP	PC20	OK	8.21707	96.6934	3.55672	5.15425	5e-05	0.00315052	yes
GSBRNA2T00033610001	BnaCnng37520D	GSBRNA2G00033610001	GSBRNA2G00033610001	chrCnn_random:36012144-36013668	UP	PC20	OK	1.93125	23.0872	3.57949	4.90987	5e-05	0.00315052	yes
GSBRNA2T00040382001	BnaC02g36770D	GSBRNA2G00040382001	GSBRNA2G00040382001	chrC02:39788769-39790625	UP	PC20	OK	2.85482	34.1538	3.58058	4.8385	5e-05	0.00315052	yes
GSBRNA2T00042303001	BnaCnng44030D	GSBRNA2G00042303001	GSBRNA2G00042303001	chrCnn_random:43169546-43171387	UP	PC20	OK	1.26045	15.1037	3.58289	4.25934	5e-05	0.00315052	yes
GSBRNA2T00132340001	BnaC03g19130D	GSBRNA2G00132340001	GSBRNA2G00132340001	chrC03:9906507-9908826	UP	PC20	OK	2.29839	27.5994	3.58594	4.32942	5e-05	0.00315052	yes
GSBRNA2T00096968001	BnaA01g30380D	GSBRNA2G00096968001	GSBRNA2G00096968001	chrA01:20865811-20868034	UP	PC20	OK	0.533467	6.48905	3.60454	3.63592	0.00035	0.0162035	yes
GSBRNA2T00009233001	BnaA05g19830D	GSBRNA2G00009233001	GSBRNA2G00009233001	chrA05:15250119-15256239	UP	PC20	OK	0.156852	1.92018	3.61377	3.40955	0.0013	0.0453439	yes
GSBRNA2T00105529001	BnaA06g08900D	GSBRNA2G00105529001	GSBRNA2G00105529001	chrA06:4822726-4825769	UP	PC20	OK	3.53516	43.74	3.62911	5.20406	5e-05	0.00315052	yes
GSBRNA2T00017623001	BnaC05g50380D	GSBRNA2G00017623001	GSBRNA2G00017623001	chrC05_random:1131732-1132437	UP	PC20	OK	1.39773	17.4337	3.64072	3.51487	0.0009	0.034061	yes
GSBRNA2T00102856001	BnaA08g21940D	GSBRNA2G00102856001	GSBRNA2G00102856001	chrA08:16103261-16104999	UP	PC20	OK	0.516261	6.44677	3.6424	3.25463	0.00085	0.0325239	yes
GSBRNA2T00107391001	BnaC05g33160D	GSBRNA2G00107391001	GSBRNA2G00107391001	chrC05:32659895-32660958	UP	PC20	OK	2.7851	35.0738	3.65459	4.91046	5e-05	0.00315052	yes
GSBRNA2T00053102001	BnaC02g12030D	GSBRNA2G00053102001	GSBRNA2G00053102001	chrC02:7422997-7427787	UP	PC20	OK	5.68973	71.7007	3.65555	4.58928	5e-05	0.00315052	yes
GSBRNA2T00019696001	BnaCnng30550D	GSBRNA2G00019696001	GSBRNA2G00019696001	chrCnn_random:29036251-29039848	UP	PC20	OK	6.45074	81.6261	3.66149	4.65774	5e-05	0.00315052	yes
GSBRNA2T00148620001	BnaA03g10620D	GSBRNA2G00148620001	GSBRNA2G00148620001	chrA03:4795742-4799004	UP	PC20	OK	3.94191	49.8826	3.66157	5.00818	5e-05	0.00315052	yes
GSBRNA2T00139619001	BnaC08g17880D	GSBRNA2G00139619001	GSBRNA2G00139619001	chrC08:21320781-21322083	UP	PC20	OK	0.554441	7.12249	3.68328	3.45264	0.00135	0.0467852	yes
GSBRNA2T00121376001	BnaA01g02230D	GSBRNA2G00121376001	GSBRNA2G00121376001	chrA01:1142698-1147072	UP	PC20	OK	6.63442	85.6753	3.69084	4.06002	5e-05	0.00315052	yes
GSBRNA2T00142853001	BnaC07g25330D	GSBRNA2G00142853001	GSBRNA2G00142853001	chrC07:31475071-31477711	UP	PC20	OK	2.645	34.5584	3.7077	4.88364	5e-05	0.00315052	yes
GSBRNA2T00102656001	BnaA07g30920D	GSBRNA2G00102656001	GSBRNA2G00102656001	chrA07:21759422-21760042	UP	PC20	OK	3.08964	41.0261	3.73103	4.25519	0.00025	0.0123267	yes
GSBRNA2T00134786001	BnaC09g06860D	GSBRNA2G00134786001	GSBRNA2G00134786001	chrC09:4246164-4246602	UP	PC20	OK	4.19575	56.009	3.73866	3.99528	5e-05	0.00315052	yes
GSBRNA2T00143822001	BnaC06g21690D	GSBRNA2G00143822001	GSBRNA2G00143822001	chrC06:23854502-23855042	UP	PC20	OK	1.19435	16.2286	3.76424	3.47489	0.0014	0.0478684	yes
GSBRNA2T00048022001	BnaA02g06790D	GSBRNA2G00048022001	GSBRNA2G00048022001	chrA02:3233536-3234019	UP	PC20	OK	3.40217	46.313	3.76689	4.01904	0.00015	0.00807736	yes
GSBRNA2T00056325001	BnaA01g13950D	GSBRNA2G00056325001	GSBRNA2G00056325001	chrA01:7087664-7088722	UP	PC20	OK	0.684454	9.36824	3.77475	3.75277	0.0005	0.0215827	yes
GSBRNA2T00073063001	BnaA08g20630D	GSBRNA2G00073063001	GSBRNA2G00073063001	chrA08:15497310-15498127	UP	PC20	OK	1.70566	23.6266	3.79201	4.20446	0.0001	0.00574178	yes
GSBRNA2T00067347001	BnaC09g21800D	GSBRNA2G00067347001	GSBRNA2G00067347001	chrC09:19037872-19040199	UP	PC20	OK	0.99521	13.8095	3.79452	4.56419	5e-05	0.00315052	yes
GSBRNA2T00155183001	BnaC04g46690D	GSBRNA2G00155183001	GSBRNA2G00155183001	chrC04:45921785-45931498	UP	PC20	OK	2.55259	35.4513	3.79581	5.18741	5e-05	0.00315052	yes
GSBRNA2T00072347001	BnaC05g14980D	GSBRNA2G00072347001	GSBRNA2G00072347001	chrC05:8949568-8950277	UP	PC20	OK	3.19587	44.5036	3.79964	4.63546	0.0001	0.00574178	yes
GSBRNA2T00012014001	BnaA09g54980D	GSBRNA2G00012014001	GSBRNA2G00012014001	chrA09_random:2969519-2971426	UP	PC20	OK	0.771224	10.8394	3.81299	4.27107	0.00015	0.00807736	yes
GSBRNA2T00054167001	BnaC05g12500D	GSBRNA2G00054167001	GSBRNA2G00054167001	chrC05:7294146-7295715	UP	PC20	OK	0.65847	9.29532	3.81931	3.99963	0.00015	0.00807736	yes
GSBRNA2T00144552001	BnaA06g31290D	GSBRNA2G00144552001	GSBRNA2G00144552001	chrA06:21065185-21067780	UP	PC20	OK	2.20855	31.1835	3.81961	4.74107	5e-05	0.00315052	yes
GSBRNA2T00001337001	BnaA02g05410D	GSBRNA2G00001337001	GSBRNA2G00001337001	chrA02:2480806-2483472	UP	PC20	OK	3.19034	45.0482	3.81969	5.41505	5e-05	0.00315052	yes
GSBRNA2T00123587001	BnaCnng02400D	GSBRNA2G00123587001	GSBRNA2G00123587001	chrCnn_random:2146397-2148586	UP	PC20	OK	0.935143	13.4139	3.8424	4.24692	5e-05	0.00315052	yes
GSBRNA2T00083812001	BnaA09g19780D	GSBRNA2G00083812001	GSBRNA2G00083812001	chrA09:12785402-12787621	UP	PC20	OK	0.622627	8.94178	3.84412	3.68144	0.00145	0.0490936	yes
GSBRNA2T00136099001	BnaA10g23540D	GSBRNA2G00136099001	GSBRNA2G00136099001	chrA10:15535553-15536876	UP	PC20	OK	0.4929	7.12851	3.85423	3.62529	0.00045	0.0198844	yes
GSBRNA2T00018531001	BnaC01g39610D	GSBRNA2G00018531001	GSBRNA2G00018531001	chrC01:38241332-38243163	UP	PC20	OK	5.39477	78.2284	3.85806	4.63475	5e-05	0.00315052	yes
GSBRNA2T00102147001	BnaA07g26300D	GSBRNA2G00102147001	GSBRNA2G00102147001	chrA07:19362016-19364383	UP	PC20	OK	0.768786	11.2346	3.86923	3.82934	0.00015	0.00807736	yes
GSBRNA2T00120022001	BnaC05g45900D	GSBRNA2G00120022001	GSBRNA2G00120022001	chrC05:41622474-41623403	UP	PC20	OK	1.29879	19.021	3.87235	4.18505	0.0001	0.00574178	yes
GSBRNA2T00084739001	BnaC04g48490D	GSBRNA2G00084739001	GSBRNA2G00084739001	chrC04:47080865-47081712	UP	PC20	OK	1.55417	22.7642	3.87255	4.55641	5e-05	0.00315052	yes
GSBRNA2T00077447001	BnaC09g33580D	GSBRNA2G00077447001	GSBRNA2G00077447001	chrC09:36872443-36876313	UP	PC20	OK	2.83585	41.5994	3.87471	5.36978	5e-05	0.00315052	yes
GSBRNA2T00066780001	BnaA03g56770D	GSBRNA2G00066780001	GSBRNA2G00066780001	chrA03_random:864404-865712	UP	PC20	OK	0.687883	10.0963	3.87552	3.79682	0.0006	0.0251389	yes
GSBRNA2T00098861001	BnaA07g17280D	GSBRNA2G00098861001	GSBRNA2G00098861001	chrA07:14469497-14471165	UP	PC20	OK	0.757639	11.1599	3.88067	3.68653	0.0009	0.034061	yes
GSBRNA2T00136918001	BnaC08g36500D	GSBRNA2G00136918001	GSBRNA2G00136918001	chrC08:33750555-33753773	UP	PC20	OK	5.42326	80.1257	3.88503	5.20108	5e-05	0.00315052	yes
GSBRNA2T00057374001	BnaA09g47460D	GSBRNA2G00057374001	GSBRNA2G00057374001	chrA09:31990455-31992915	UP	PC20	OK	2.57427	38.0425	3.88537	5.46278	5e-05	0.00315052	yes
GSBRNA2T00146043001	BnaC09g04500D	GSBRNA2G00146043001	GSBRNA2G00146043001	chrC09:2573612-2575815	UP	PC20	OK	2.06528	30.5678	3.88761	5.35778	5e-05	0.00315052	yes
GSBRNA2T00137022001	BnaC08g35620D	GSBRNA2G00137022001	GSBRNA2G00137022001	chrC08:33369987-33372420	UP	PC20	OK	2.89216	42.8611	3.88945	5.54106	5e-05	0.00315052	yes
GSBRNA2T00111281001	BnaA04g06350D	GSBRNA2G00111281001	GSBRNA2G00111281001	chrA04:4898527-4899830	UP	PC20	OK	2.44112	36.4765	3.90135	5.07677	5e-05	0.00315052	yes
GSBRNA2T00145161001	BnaC08g01580D	GSBRNA2G00145161001	GSBRNA2G00145161001	chrC08:1220457-1225549	UP	PC20	OK	0.291668	4.42198	3.92229	4.10953	5e-05	0.00315052	yes
GSBRNA2T00125323001	BnaC03g34580D	GSBRNA2G00125323001	GSBRNA2G00125323001	chrC03:20973434-20975192	UP	PC20	OK	0.769949	11.7447	3.9311	4.28416	5e-05	0.00315052	yes
GSBRNA2T00137084001	BnaC02g22250D	GSBRNA2G00137084001	GSBRNA2G00137084001	chrC02:19100902-19101865	UP	PC20	OK	7.0286	108.306	3.94573	6.12211	5e-05	0.00315052	yes
GSBRNA2T00078837001	BnaA08g13860D	GSBRNA2G00078837001	GSBRNA2G00078837001	chrA08:11899913-11900944	UP	PC20	OK	0.741854	11.5515	3.96081	3.82817	0.00065	0.0268169	yes
GSBRNA2T00079037001	BnaA10g06640D	GSBRNA2G00079037001	GSBRNA2G00079037001	chrA10:5094398-5095787	UP	PC20	OK	1.90245	29.781	3.96846	4.90417	5e-05	0.00315052	yes
GSBRNA2T00153592001	BnaC03g32580D	GSBRNA2G00153592001	GSBRNA2G00153592001	chrC03:19984286-19984883	UP	PC20	OK	1.94937	30.6507	3.97484	3.96051	0.00045	0.0198844	yes
GSBRNA2T00043969001	BnaA02g35410D	GSBRNA2G00043969001	GSBRNA2G00043969001	chrA02_random:252434-255509	UP	PC20	OK	5.11	80.5163	3.97789	5.11019	5e-05	0.00315052	yes
GSBRNA2T00017259001	BnaCnng73470D	GSBRNA2G00017259001	GSBRNA2G00017259001	chrCnn_random:74071303-74072988	UP	PC20	OK	0.652061	10.5354	4.0141	4.51872	5e-05	0.00315052	yes
GSBRNA2T00009608001	BnaA09g04970D	GSBRNA2G00009608001	GSBRNA2G00009608001	chrA09:2446828-2448987	UP	PC20	OK	1.05704	17.1735	4.02208	4.76265	5e-05	0.00315052	yes
GSBRNA2T00059448001	BnaA07g00870D	GSBRNA2G00059448001	GSBRNA2G00059448001	chrA07:614477-617853	UP	PC20	OK	7.43104	120.788	4.02277	5.04518	5e-05	0.00315052	yes
GSBRNA2T00018765001	BnaC02g26030D	GSBRNA2G00018765001	GSBRNA2G00018765001	chrC02:23284720-23287093	UP	PC20	OK	0.956446	15.7266	4.03938	4.13561	0.0003	0.014397	yes
GSBRNA2T00078480001	BnaC09g38510D	GSBRNA2G00078480001	GSBRNA2G00078480001	chrC09:41386228-41387766	UP	PC20	OK	0.931723	15.4024	4.04711	3.85174	0.0008	0.0311762	yes
GSBRNA2T00136137001	BnaA10g23880D	GSBRNA2G00136137001	GSBRNA2G00136137001	chrA10:15687854-15689806	UP	PC20	OK	10.251	170.259	4.0539	4.93024	5e-05	0.00315052	yes
GSBRNA2T00102296001	BnaC02g14450D	GSBRNA2G00102296001	GSBRNA2G00102296001	chrC02:9883452-9884071	UP	PC20	OK	2.95674	49.3303	4.06039	3.8942	0.00015	0.00807736	yes
GSBRNA2T00007279001	BnaC03g71790D	GSBRNA2G00007279001	GSBRNA2G00007279001	chrC03_random:334992-338193	UP	PC20	OK	2.2694	37.9843	4.06502	5.30015	5e-05	0.00315052	yes
GSBRNA2T00140453001	BnaC03g06930D	GSBRNA2G00140453001	GSBRNA2G00140453001	chrC03:3309427-3310828	UP	PC20	OK	0.469597	7.86759	4.06643	3.93778	0.00065	0.0268169	yes
GSBRNA2T00060803001	BnaC03g13800D	GSBRNA2G00060803001	GSBRNA2G00060803001	chrC03:6659998-6661352	UP	PC20	OK	0.482902	8.1667	4.07995	3.58645	0.0012	0.0424975	yes
GSBRNA2T00149065001	BnaA04g02260D	GSBRNA2G00149065001	GSBRNA2G00149065001	chrA04:1462057-1462243	UP	PC20	OK	81.7991	1398.86	4.09602	4.86567	5e-05	0.00315052	yes
GSBRNA2T00009793001	BnaA09g02760D	GSBRNA2G00009793001	GSBRNA2G00009793001	chrA09:1408219-1411015	UP	PC20	OK	8.39087	144.687	4.10797	4.6355	5e-05	0.00315052	yes
GSBRNA2T00073646001	BnaC02g13820D	GSBRNA2G00073646001	GSBRNA2G00073646001	chrC02:9142507-9146099	UP	PC20	OK	2.98782	51.7487	4.11436	5.32315	5e-05	0.00315052	yes
GSBRNA2T00150895001	BnaA08g16720D	GSBRNA2G00150895001	GSBRNA2G00150895001	chrA08:13517878-13521291	UP	PC20	OK	1.67069	29.2044	4.12767	5.36579	5e-05	0.00315052	yes
GSBRNA2T00127193001	BnaC08g32950D	GSBRNA2G00127193001	GSBRNA2G00127193001	chrC08:31662579-31671855	UP	PC20	OK	0.270283	4.81605	4.15531	4.41353	5e-05	0.00315052	yes
GSBRNA2T00072371001	BnaA09g18340D	GSBRNA2G00072371001	GSBRNA2G00072371001	chrA09:11423248-11428344	UP	PC20	OK	2.03953	37.3065	4.19311	5.23394	5e-05	0.00315052	yes
GSBRNA2T00104151001	BnaC09g44650D	GSBRNA2G00104151001	GSBRNA2G00104151001	chrC09:45367915-45371109	UP	PC20	OK	1.30253	23.9053	4.19794	5.37294	5e-05	0.00315052	yes
GSBRNA2T00078344001	BnaA09g43940D	GSBRNA2G00078344001	GSBRNA2G00078344001	chrA09:30284900-30288190	UP	PC20	OK	2.60322	48.0734	4.20687	5.72319	5e-05	0.00315052	yes
GSBRNA2T00142184001	BnaA03g13650D	GSBRNA2G00142184001	GSBRNA2G00142184001	chrA03:6248340-6249325	UP	PC20	OK	0.877214	16.2028	4.20717	4.1787	0.00045	0.0198844	yes
GSBRNA2T00028989001	BnaC06g18580D	GSBRNA2G00028989001	GSBRNA2G00028989001	chrC06:20929704-20932437	UP	PC20	OK	1.34861	24.9446	4.20919	5.16309	5e-05	0.00315052	yes
GSBRNA2T00090247001	BnaA04g12240D	GSBRNA2G00090247001	GSBRNA2G00090247001	chrA04:10419234-10422793	UP	PC20	OK	1.21524	22.8766	4.23456	5.47208	5e-05	0.00315052	yes
GSBRNA2T00096582001	BnaCnng66900D	GSBRNA2G00096582001	GSBRNA2G00096582001	chrCnn_random:66590503-66592591	UP	PC20	OK	3.902	73.5377	4.2362	5.0622	5e-05	0.00315052	yes
GSBRNA2T00095844001	BnaC05g30810D	GSBRNA2G00095844001	GSBRNA2G00095844001	chrC05:29913038-29919180	UP	PC20	OK	0.265878	5.11951	4.26717	4.38697	5e-05	0.00315052	yes
GSBRNA2T00097050001	BnaCnng67100D	GSBRNA2G00097050001	GSBRNA2G00097050001	chrCnn_random:66785262-66786909	UP	PC20	OK	0.556049	10.7785	4.2768	4.01799	0.00035	0.0162035	yes
GSBRNA2T00150687001	BnaA08g18320D	GSBRNA2G00150687001	GSBRNA2G00150687001	chrA08:14362176-14363947	UP	PC20	OK	2.73427	54.2172	4.30952	4.95488	5e-05	0.00315052	yes
GSBRNA2T00114126001	BnaA08g00950D	GSBRNA2G00114126001	GSBRNA2G00114126001	chrA08:645829-646769	UP	PC20	OK	0.658347	13.3006	4.3365	3.78659	0.0011	0.0398877	yes
GSBRNA2T00052820001	BnaA10g10880D	GSBRNA2G00052820001	GSBRNA2G00052820001	chrA10:9212153-9214941	UP	PC20	OK	1.92891	39.3205	4.34943	5.4232	5e-05	0.00315052	yes
GSBRNA2T00122669001	BnaC02g12730D	GSBRNA2G00122669001	GSBRNA2G00122669001	chrC02:8102753-8105962	UP	PC20	OK	3.9256	80.553	4.35895	5.27581	5e-05	0.00315052	yes
GSBRNA2T00081462001	BnaC06g43940D	GSBRNA2G00081462001	GSBRNA2G00081462001	chrC06_random:3312288-3313185	UP	PC20	OK	2.51379	52.6045	4.38725	5.58868	5e-05	0.00315052	yes
GSBRNA2T00063834001	BnaA01g25310D	GSBRNA2G00063834001	GSBRNA2G00063834001	chrA01:17711929-17718009	UP	PC20	OK	0.196315	4.13673	4.39725	4.21656	0.0004	0.0180197	yes
GSBRNA2T00076135001	BnaA05g32260D	GSBRNA2G00076135001	GSBRNA2G00076135001	chrA05:22116463-22119224	UP	PC20	OK	0.73717	15.537	4.39756	4.81001	5e-05	0.00315052	yes
GSBRNA2T00059872001	BnaC03g41470D	GSBRNA2G00059872001	GSBRNA2G00059872001	chrC03:26429525-26431892	UP	PC20	OK	1.16676	24.8439	4.41231	5.58419	5e-05	0.00315052	yes
GSBRNA2T00125190001	BnaC03g35500D	GSBRNA2G00125190001	GSBRNA2G00125190001	chrC03:21557259-21558509	UP	PC20	OK	4.37885	93.8054	4.42105	5.50997	5e-05	0.00315052	yes
GSBRNA2T00090908001	BnaA02g11790D	GSBRNA2G00090908001	GSBRNA2G00090908001	chrA02:6182711-6184239	UP	PC20	OK	0.869527	18.6296	4.42122	4.86642	5e-05	0.00315052	yes
GSBRNA2T00119678001	BnaAnng01320D	GSBRNA2G00119678001	GSBRNA2G00119678001	chrAnn_random:808196-809979	UP	PC20	OK	0.616378	13.2961	4.43105	4.87168	5e-05	0.00315052	yes
GSBRNA2T00129594001	BnaA09g34540D	GSBRNA2G00129594001	GSBRNA2G00129594001	chrA09:25288909-25290286	UP	PC20	OK	0.5044	10.9797	4.44412	4.25348	0.00015	0.00807736	yes
GSBRNA2T00032039001	BnaC05g04600D	GSBRNA2G00032039001	GSBRNA2G00032039001	chrC05:2260658-2262854	UP	PC20	OK	1.72656	38.4326	4.47636	5.20333	5e-05	0.00315052	yes
GSBRNA2T00112943001	BnaC06g28370D	GSBRNA2G00112943001	GSBRNA2G00112943001	chrC06:29585338-29587436	UP	PC20	OK	0.785631	17.8193	4.50345	4.42948	5e-05	0.00315052	yes
GSBRNA2T00076367001	BnaC03g58910D	GSBRNA2G00076367001	GSBRNA2G00076367001	chrC03:48164432-48165553	UP	PC20	OK	3.1277	71.1942	4.50859	4.98102	5e-05	0.00315052	yes
GSBRNA2T00137360001	BnaA03g35630D	GSBRNA2G00137360001	GSBRNA2G00137360001	chrA03:17398863-17401047	UP	PC20	OK	1.20697	27.5146	4.51073	5.68594	5e-05	0.00315052	yes
GSBRNA2T00036429001	BnaCnng40460D	GSBRNA2G00036429001	GSBRNA2G00036429001	chrCnn_random:39004746-39006265	UP	PC20	OK	1.12975	25.879	4.5177	4.603	0.00015	0.00807736	yes
GSBRNA2T00018422001	BnaA09g00750D	GSBRNA2G00018422001	GSBRNA2G00018422001	chrA09:476937-477869	UP	PC20	OK	11.0271	259.002	4.55384	6.24723	5e-05	0.00315052	yes
GSBRNA2T00098727001	BnaA07g16250D	GSBRNA2G00098727001	GSBRNA2G00098727001	chrA07:13817141-13818980	UP	PC20	OK	1.78399	42.0297	4.55823	4.96473	5e-05	0.00315052	yes
GSBRNA2T00154122001	BnaA10g14100D	GSBRNA2G00154122001	GSBRNA2G00154122001	chrA10:11276562-11277546	UP	PC20	OK	0.880696	20.8483	4.56514	4.4347	0.0003	0.014397	yes
GSBRNA2T00153833001	BnaA05g22710D	GSBRNA2G00153833001	GSBRNA2G00153833001	chrA05:17234252-17238108	UP	PC20	OK	0.567064	13.4282	4.56561	4.92019	5e-05	0.00315052	yes
GSBRNA2T00096612001	BnaCnng19220D	GSBRNA2G00096612001	GSBRNA2G00096612001	chrCnn_random:17903979-17904866	UP	PC20	OK	14.7153	348.853	4.56723	5.89333	5e-05	0.00315052	yes
GSBRNA2T00135556001	BnaA10g18990D	GSBRNA2G00135556001	GSBRNA2G00135556001	chrA10:13639478-13641483	UP	PC20	OK	0.772129	18.388	4.57378	5.04896	5e-05	0.00315052	yes
GSBRNA2T00099011001	BnaA07g18550D	GSBRNA2G00099011001	GSBRNA2G00099011001	chrA07:15089970-15093068	UP	PC20	OK	0.723322	17.3564	4.58469	5.00389	5e-05	0.00315052	yes
GSBRNA2T00152815001	BnaC04g06800D	GSBRNA2G00152815001	GSBRNA2G00152815001	chrC04:4910116-4912485	UP	PC20	OK	0.49048	11.8497	4.59451	4.49961	5e-05	0.00315052	yes
GSBRNA2T00151056001	BnaA03g43350D	GSBRNA2G00151056001	GSBRNA2G00151056001	chrA03:21779150-21780989	UP	PC20	OK	0.533535	12.8907	4.5946	4.21739	0.00065	0.0268169	yes
GSBRNA2T00153186001	BnaC08g06180D	GSBRNA2G00153186001	GSBRNA2G00153186001	chrC08:8693343-8694262	UP	PC20	OK	1.00178	24.3373	4.60253	4.4704	0.0003	0.014397	yes
GSBRNA2T00138676001	BnaA03g23580D	GSBRNA2G00138676001	GSBRNA2G00138676001	chrA03:11271408-11273915	UP	PC20	OK	0.935074	22.7404	4.60404	5.40492	5e-05	0.00315052	yes
GSBRNA2T00055780001	BnaC02g43880D	GSBRNA2G00055780001	GSBRNA2G00055780001	chrC02:45990312-45993085	UP	PC20	OK	0.626956	16.0228	4.67562	5.05202	5e-05	0.00315052	yes
GSBRNA2T00006023001	BnaAnng03120D	GSBRNA2G00006023001	GSBRNA2G00006023001	chrAnn_random:2481793-2483609	UP	PC20	OK	0.657371	16.8124	4.67668	5.07149	5e-05	0.00315052	yes
GSBRNA2T00147638001	BnaA06g27700D	GSBRNA2G00147638001	GSBRNA2G00147638001	chrA06:19051402-19054759	UP	PC20	OK	0.230638	6.01393	4.70461	4.38482	0.00015	0.00807736	yes
GSBRNA2T00057950001	BnaA06g10890D	GSBRNA2G00057950001	GSBRNA2G00057950001	chrA06:5686670-5690302	UP	PC20	OK	0.538049	14.0428	4.70595	5.09366	5e-05	0.00315052	yes
GSBRNA2T00108140001	BnaC04g33890D	GSBRNA2G00108140001	GSBRNA2G00108140001	chrC04:35390685-35392686	UP	PC20	OK	1.06448	28.5983	4.74771	5.25563	5e-05	0.00315052	yes
GSBRNA2T00026282001	BnaC01g37690D	GSBRNA2G00026282001	GSBRNA2G00026282001	chrC01:36983193-36985284	UP	PC20	OK	0.344888	9.36779	4.76351	4.0466	0.00125	0.0440112	yes
GSBRNA2T00102415001	BnaA07g28890D	GSBRNA2G00102415001	GSBRNA2G00102415001	chrA07:20812691-20814654	UP	PC20	OK	0.515677	14.437	4.80716	4.37311	0.00085	0.0325239	yes
GSBRNA2T00156919001	BnaC07g36670D	GSBRNA2G00156919001	GSBRNA2G00156919001	chrC07:38642450-38646115	UP	PC20	OK	3.34636	94.0002	4.812	5.11061	5e-05	0.00315052	yes
GSBRNA2T00062612001	BnaA03g11060D	GSBRNA2G00062612001	GSBRNA2G00062612001	chrA03:4969164-4972492	UP	PC20	OK	0.39799	11.2199	4.81718	4.65722	5e-05	0.00315052	yes
GSBRNA2T00020062001	BnaA06g40790D	GSBRNA2G00020062001	GSBRNA2G00020062001	chrA06_random:2182102-2184712	UP	PC20	OK	1.51446	43.5249	4.84497	6.2045	5e-05	0.00315052	yes
GSBRNA2T00049471001	BnaA09g39720D	GSBRNA2G00049471001	GSBRNA2G00049471001	chrA09:28106988-28109066	UP	PC20	OK	5.36651	155.626	4.85795	5.37785	5e-05	0.00315052	yes
GSBRNA2T00085323001	BnaC05g00310D	GSBRNA2G00085323001	GSBRNA2G00085323001	chrC05:150985-152587	UP	PC20	OK	0.55921	16.5538	4.88763	4.43591	0.0009	0.034061	yes
GSBRNA2T00120717001	BnaC02g38360D	GSBRNA2G00120717001	GSBRNA2G00120717001	chrC02:41340976-41342766	UP	PC20	OK	5.70182	169.563	4.89426	4.98067	5e-05	0.00315052	yes
GSBRNA2T00062035001	BnaC05g10210D	GSBRNA2G00062035001	GSBRNA2G00062035001	chrC05:5736645-5739548	UP	PC20	OK	0.912255	27.2048	4.89828	5.70365	5e-05	0.00315052	yes
GSBRNA2T00138707001	BnaA03g23290D	GSBRNA2G00138707001	GSBRNA2G00138707001	chrA03:11135067-11136172	UP	PC20	OK	0.895192	27.7755	4.95547	4.86125	0.0004	0.0180197	yes
GSBRNA2T00012629001	BnaC04g05270D	GSBRNA2G00012629001	GSBRNA2G00012629001	chrC04:3733319-3736868	UP	PC20	OK	2.04967	63.8858	4.96203	5.92783	5e-05	0.00315052	yes
GSBRNA2T00136135001	BnaA10g23860D	GSBRNA2G00136135001	GSBRNA2G00136135001	chrA10:15680728-15682706	UP	PC20	OK	2.55929	81.1768	4.98725	5.55931	5e-05	0.00315052	yes
GSBRNA2T00041446001	BnaA02g09870D	GSBRNA2G00041446001	GSBRNA2G00041446001	chrA02:4950702-4954201	UP	PC20	OK	0.80411	25.5054	4.98727	5.69921	5e-05	0.00315052	yes
GSBRNA2T00150715001	BnaA08g18150D	GSBRNA2G00150715001	GSBRNA2G00150715001	chrA08:14253893-14255121	UP	PC20	OK	2.10215	66.7092	4.98795	4.91537	5e-05	0.00315052	yes
GSBRNA2T00085844001	BnaCnng14120D	GSBRNA2G00085844001	GSBRNA2G00085844001	chrCnn_random:12904437-12904623	UP	PC20	OK	43.9741	1401.48	4.99415	5.42319	0.0002	0.0102143	yes
GSBRNA2T00113509001	BnaA03g40500D	GSBRNA2G00113509001	GSBRNA2G00113509001	chrA03:20235011-20236815	UP	PC20	OK	2.48295	79.6495	5.00354	5.84361	5e-05	0.00315052	yes
GSBRNA2T00130027001	BnaA03g05250D	GSBRNA2G00130027001	GSBRNA2G00130027001	chrA03:2421017-2422758	UP	PC20	OK	0.960507	30.9334	5.00923	4.49528	0.0008	0.0311762	yes
GSBRNA2T00101786001	BnaC05g35890D	GSBRNA2G00101786001	GSBRNA2G00101786001	chrC05:35102646-35104795	UP	PC20	OK	0.59964	19.3179	5.0097	4.67917	0.0004	0.0180197	yes
GSBRNA2T00007895001	BnaCnng23550D	GSBRNA2G00007895001	GSBRNA2G00007895001	chrCnn_random:21959659-21960515	UP	PC20	OK	1.00743	32.8612	5.02764	4.40192	0.00045	0.0198844	yes
GSBRNA2T00079332001	BnaC03g48810D	GSBRNA2G00079332001	GSBRNA2G00079332001	chrC03:33632883-33635337	UP	PC20	OK	0.695759	22.7355	5.03022	5.32906	5e-05	0.00315052	yes
GSBRNA2T00031979001	BnaC05g04080D	GSBRNA2G00031979001	GSBRNA2G00031979001	chrC05:1988936-1993604	UP	PC20	OK	0.459588	15.1087	5.0389	5.41482	5e-05	0.00315052	yes
GSBRNA2T00065089001	BnaCnng08890D	GSBRNA2G00065089001	GSBRNA2G00065089001	chrCnn_random:8194479-8196157	UP	PC20	OK	0.672143	22.2351	5.04793	4.7122	0.00015	0.00807736	yes
GSBRNA2T00092525001	BnaA02g10360D	GSBRNA2G00092525001	GSBRNA2G00092525001	chrA02:5301232-5301844	UP	PC20	OK	2.864	95.646	5.0616	4.82112	5e-05	0.00315052	yes
GSBRNA2T00077283001	BnaA06g23180D	GSBRNA2G00077283001	GSBRNA2G00077283001	chrA06:16148590-16154160	UP	PC20	OK	0.171315	5.77709	5.07562	4.9529	0.00015	0.00807736	yes
GSBRNA2T00130886001	BnaC01g03500D	GSBRNA2G00130886001	GSBRNA2G00130886001	chrC01:1811440-1815719	UP	PC20	OK	2.10937	71.2502	5.07801	5.92299	5e-05	0.00315052	yes
GSBRNA2T00157138001	BnaC07g38360D	GSBRNA2G00157138001	GSBRNA2G00157138001	chrC07:39674199-39676975	UP	PC20	OK	0.30252	10.2557	5.08326	4.38936	0.00075	0.0297778	yes
GSBRNA2T00087972001	BnaA10g03960D	GSBRNA2G00087972001	GSBRNA2G00087972001	chrA10:2101911-2106870	UP	PC20	OK	0.59821	20.3081	5.08526	5.85172	5e-05	0.00315052	yes
GSBRNA2T00138420001	BnaA01g19850D	GSBRNA2G00138420001	GSBRNA2G00138420001	chrA01:11464957-11467265	UP	PC20	OK	1.0519	35.8911	5.09256	5.54025	5e-05	0.00315052	yes
GSBRNA2T00133735001	BnaC07g28380D	GSBRNA2G00133735001	GSBRNA2G00133735001	chrC07:33525598-33531418	UP	PC20	OK	0.136454	4.69526	5.10472	4.68668	0.00055	0.0233056	yes
GSBRNA2T00054182001	BnaC05g12390D	GSBRNA2G00054182001	GSBRNA2G00054182001	chrC05:7168046-7171596	UP	PC20	OK	0.414593	14.3292	5.11112	4.4673	0.0012	0.0424975	yes
GSBRNA2T00111771001	BnaA03g30180D	GSBRNA2G00111771001	GSBRNA2G00111771001	chrA03:14640282-14642602	UP	PC20	OK	2.16115	75.6708	5.12987	6.25953	5e-05	0.00315052	yes
GSBRNA2T00064623001	BnaA04g19460D	GSBRNA2G00064623001	GSBRNA2G00064623001	chrA04:15317986-15321550	UP	PC20	OK	0.245959	8.63685	5.13402	4.43094	0.00075	0.0297778	yes
GSBRNA2T00127121001	BnaC08g32350D	GSBRNA2G00127121001	GSBRNA2G00127121001	chrC08:31318388-31318727	UP	PC20	OK	3.72069	130.926	5.13703	4.21419	0.00095	0.0355101	yes
GSBRNA2T00054617001	BnaCnng51570D	GSBRNA2G00054617001	GSBRNA2G00054617001	chrCnn_random:51032707-51035062	UP	PC20	OK	0.775481	28.3127	5.19021	5.68853	5e-05	0.00315052	yes
GSBRNA2T00135036001	BnaC09g08620D	GSBRNA2G00135036001	GSBRNA2G00135036001	chrC09:5495764-5507132	UP	PC20	OK	0.0963374	3.55126	5.20409	4.8873	0.00015	0.00807736	yes
GSBRNA2T00108466001	BnaC05g22110D	GSBRNA2G00108466001	GSBRNA2G00108466001	chrC05:15994031-15995493	UP	PC20	OK	1.67427	62.7261	5.22746	5.15298	5e-05	0.00315052	yes
GSBRNA2T00068264001	BnaA04g13950D	GSBRNA2G00068264001	GSBRNA2G00068264001	chrA04:11809797-11811744	UP	PC20	OK	1.00437	38.2782	5.25217	5.01832	5e-05	0.00315052	yes
GSBRNA2T00135598001	BnaA10g19340D	GSBRNA2G00135598001	GSBRNA2G00135598001	chrA10:13778376-13779105	UP	PC20	OK	1.34389	51.3905	5.25701	5.42589	0.0005	0.0215827	yes
GSBRNA2T00140439001	BnaC03g06790D	GSBRNA2G00140439001	GSBRNA2G00140439001	chrC03:3239798-3241618	UP	PC20	OK	1.19492	46.5469	5.2837	5.34901	5e-05	0.00315052	yes
GSBRNA2T00011180001	BnaCnng71300D	GSBRNA2G00011180001	GSBRNA2G00011180001	chrCnn_random:71480283-71481422	UP	PC20	OK	2.57236	101.255	5.29875	5.73578	5e-05	0.00315052	yes
GSBRNA2T00077001001	BnaA04g20360D	GSBRNA2G00077001001	GSBRNA2G00077001001	chrA04:15705732-15707918	UP	PC20	OK	2.93687	115.646	5.2993	6.49234	5e-05	0.00315052	yes
GSBRNA2T00030855001	BnaA02g26300D	GSBRNA2G00030855001	GSBRNA2G00030855001	chrA02:19402479-19406384	UP	PC20	OK	1.04748	41.2492	5.29937	5.2734	5e-05	0.00315052	yes
GSBRNA2T00059181001	BnaC03g58640D	GSBRNA2G00059181001	GSBRNA2G00059181001	chrC03:47923963-47924499	UP	PC20	OK	2.7933	110.052	5.30007	4.50166	0.00055	0.0233056	yes
GSBRNA2T00091684001	BnaC04g02260D	GSBRNA2G00091684001	GSBRNA2G00091684001	chrC04:1742828-1744781	UP	PC20	OK	0.367545	14.6257	5.31444	4.6028	0.00075	0.0297778	yes
GSBRNA2T00009514001	BnaA09g04200D	GSBRNA2G00009514001	GSBRNA2G00009514001	chrA09:2085449-2085686	UP	PC20	OK	17.686	706.043	5.31907	5.21949	5e-05	0.00315052	yes
GSBRNA2T00012167001	BnaC04g36920D	GSBRNA2G00012167001	GSBRNA2G00012167001	chrC04:38375692-38377595	UP	PC20	OK	1.63291	65.4085	5.32396	5.57782	5e-05	0.00315052	yes
GSBRNA2T00115620001	BnaC09g19870D	GSBRNA2G00115620001	GSBRNA2G00115620001	chrC09:16962480-16963464	UP	PC20	OK	0.87559	35.4785	5.34055	5.17952	0.00065	0.0268169	yes
GSBRNA2T00130944001	BnaC01g02960D	GSBRNA2G00130944001	GSBRNA2G00130944001	chrC01:1544537-1545293	UP	PC20	OK	1.71798	69.7653	5.34373	5.35575	5e-05	0.00315052	yes
GSBRNA2T00085697001	BnaC04g42320D	GSBRNA2G00085697001	GSBRNA2G00085697001	chrC04:42891175-42894233	UP	PC20	OK	0.744054	30.3736	5.35127	6.13846	5e-05	0.00315052	yes
GSBRNA2T00077003001	BnaA04g20340D	GSBRNA2G00077003001	GSBRNA2G00077003001	chrA04:15697498-15699770	UP	PC20	OK	4.03017	166.041	5.36456	6.51162	5e-05	0.00315052	yes
GSBRNA2T00135025001	BnaC09g08530D	GSBRNA2G00135025001	GSBRNA2G00135025001	chrC09:5424420-5425647	UP	PC20	OK	0.565106	23.3898	5.37121	4.62504	0.0013	0.0453439	yes
GSBRNA2T00031591001	BnaC09g43110D	GSBRNA2G00031591001	GSBRNA2G00031591001	chrC09:44447534-44447993	UP	PC20	OK	3.90085	161.594	5.37244	5.15726	5e-05	0.00315052	yes
GSBRNA2T00146055001	BnaC09g04570D	GSBRNA2G00146055001	GSBRNA2G00146055001	chrC09:2623180-2624335	UP	PC20	OK	0.833082	34.6929	5.38004	4.90845	0.0001	0.00574178	yes
GSBRNA2T00083907001	BnaCnng62360D	GSBRNA2G00083907001	GSBRNA2G00083907001	chrCnn_random:62181987-62183029	UP	PC20	OK	1.17183	49.3236	5.39544	5.02482	0.0001	0.00574178	yes
GSBRNA2T00136136001	BnaA10g23870D	GSBRNA2G00136136001	GSBRNA2G00136136001	chrA10:15683922-15685873	UP	PC20	OK	5.21309	225.144	5.43257	5.6401	5e-05	0.00315052	yes
GSBRNA2T00124091001	BnaC04g19100D	GSBRNA2G00124091001	GSBRNA2G00124091001	chrC04:19276819-19278348	UP	PC20	OK	0.858404	37.8224	5.46144	5.24648	0.00015	0.00807736	yes
GSBRNA2T00143224001	BnaA02g02970D	GSBRNA2G00143224001	GSBRNA2G00143224001	chrA02:1313417-1315459	UP	PC20	OK	0.749422	33.2953	5.4734	5.38426	5e-05	0.00315052	yes
GSBRNA2T00123724001	BnaC03g38600D	GSBRNA2G00123724001	GSBRNA2G00123724001	chrC03:23750412-23751808	UP	PC20	OK	2.24929	102.223	5.50611	5.77945	5e-05	0.00315052	yes
GSBRNA2T00037356001	BnaC04g50020D	GSBRNA2G00037356001	GSBRNA2G00037356001	chrC04:47847070-47848258	UP	PC20	OK	0.794452	36.1228	5.5068	5.04654	0.00075	0.0297778	yes
GSBRNA2T00008834001	BnaC05g08260D	GSBRNA2G00008834001	GSBRNA2G00008834001	chrC05:4337958-4338465	UP	PC20	OK	2.60062	122.71	5.56025	5.28815	5e-05	0.00315052	yes
GSBRNA2T00053336001	BnaA04g27260D	GSBRNA2G00053336001	GSBRNA2G00053336001	chrA04_random:13561-14962	UP	PC20	OK	0.703469	33.3536	5.56721	5.40358	0.0001	0.00574178	yes
GSBRNA2T00019139001	BnaC03g23540D	GSBRNA2G00019139001	GSBRNA2G00019139001	chrC03:13126441-13127773	UP	PC20	OK	1.10352	52.7206	5.57818	5.34739	5e-05	0.00315052	yes
GSBRNA2T00107093001	BnaC09g48600D	GSBRNA2G00107093001	GSBRNA2G00107093001	chrC09:47328694-47330684	UP	PC20	OK	3.21432	153.681	5.57928	6.07511	5e-05	0.00315052	yes
GSBRNA2T00074358001	BnaC05g40510D	GSBRNA2G00074358001	GSBRNA2G00074358001	chrC05:38661297-38663262	UP	PC20	OK	0.544024	26.0448	5.58118	4.76379	0.00085	0.0325239	yes
GSBRNA2T00049666001	BnaC06g31750D	GSBRNA2G00049666001	GSBRNA2G00049666001	chrC06:32205319-32205690	UP	PC20	OK	17.4536	840.015	5.58881	6.54478	5e-05	0.00315052	yes
GSBRNA2T00150173001	BnaC03g46580D	GSBRNA2G00150173001	GSBRNA2G00150173001	chrC03:31570991-31577619	UP	PC20	OK	0.399441	19.2828	5.59318	5.82879	5e-05	0.00315052	yes
GSBRNA2T00133614001	BnaC07g29340D	GSBRNA2G00133614001	GSBRNA2G00133614001	chrC07:34137045-34140090	UP	PC20	OK	0.218205	10.5871	5.60048	4.74576	0.00105	0.0384482	yes
GSBRNA2T00065417001	BnaC02g06390D	GSBRNA2G00065417001	GSBRNA2G00065417001	chrC02:3417337-3419373	UP	PC20	OK	0.443845	21.5554	5.60185	5.34028	5e-05	0.00315052	yes
GSBRNA2T00130020001	BnaA03g05190D	GSBRNA2G00130020001	GSBRNA2G00130020001	chrA03:2389310-2391491	UP	PC20	OK	0.673904	32.7439	5.60254	5.59888	5e-05	0.00315052	yes
GSBRNA2T00109882001	BnaA06g22030D	GSBRNA2G00109882001	GSBRNA2G00109882001	chrA06:15402997-15404567	UP	PC20	OK	1.49839	72.8623	5.60369	6.2665	5e-05	0.00315052	yes
GSBRNA2T00033738001	BnaC03g74760D	GSBRNA2G00033738001	GSBRNA2G00033738001	chrC03_random:2844106-2845609	UP	PC20	OK	1.57043	78.1235	5.63653	6.27014	5e-05	0.00315052	yes
GSBRNA2T00140434001	BnaC03g06740D	GSBRNA2G00140434001	GSBRNA2G00140434001	chrC03:3225420-3227665	UP	PC20	OK	0.796995	40.3445	5.66166	5.60685	5e-05	0.00315052	yes
GSBRNA2T00032154001	BnaC05g29750D	GSBRNA2G00032154001	GSBRNA2G00032154001	chrC05:28658311-28661206	UP	PC20	OK	0.905607	46.0255	5.6674	5.99295	5e-05	0.00315052	yes
GSBRNA2T00003797001	BnaA07g36770D	GSBRNA2G00003797001	GSBRNA2G00003797001	chrA07_random:673038-673398	UP	PC20	OK	2.79906	142.805	5.67296	4.47708	0.0011	0.0398877	yes
GSBRNA2T00011949001	BnaCnng71770D	GSBRNA2G00011949001	GSBRNA2G00011949001	chrCnn_random:72040788-72042162	UP	PC20	OK	3.0412	155.494	5.67608	6.11996	5e-05	0.00315052	yes
GSBRNA2T00100311001	BnaC07g47390D	GSBRNA2G00100311001	GSBRNA2G00100311001	chrC07:44623201-44625811	UP	PC20	OK	0.812781	41.5959	5.67743	6.43846	5e-05	0.00315052	yes
GSBRNA2T00111879001	BnaA03g29240D	GSBRNA2G00111879001	GSBRNA2G00111879001	chrA03:14224591-14225789	UP	PC20	OK	1.20773	62.6999	5.6981	5.33167	5e-05	0.00315052	yes
GSBRNA2T00072978001	BnaCnng10290D	GSBRNA2G00072978001	GSBRNA2G00072978001	chrCnn_random:9360808-9362430	UP	PC20	OK	2.50846	130.268	5.69853	6.1606	5e-05	0.00315052	yes
GSBRNA2T00154309001	BnaA10g15660D	GSBRNA2G00154309001	GSBRNA2G00154309001	chrA10:12088301-12089723	UP	PC20	OK	0.999175	51.9513	5.70028	5.4409	0.0001	0.00574178	yes
GSBRNA2T00064167001	BnaA05g34110D	GSBRNA2G00064167001	GSBRNA2G00064167001	chrA05:23031774-23037597	UP	PC20	OK	0.361513	18.8432	5.70385	5.66869	5e-05	0.00315052	yes
GSBRNA2T00115206001	BnaC04g25500D	GSBRNA2G00115206001	GSBRNA2G00115206001	chrC04:26635738-26638091	UP	PC20	OK	3.67452	194.12	5.72325	6.02167	5e-05	0.00315052	yes
GSBRNA2T00153593001	BnaC03g32590D	GSBRNA2G00153593001	GSBRNA2G00153593001	chrC03:19989404-19990113	UP	PC20	OK	3.27862	173.224	5.7234	6.37123	5e-05	0.00315052	yes
GSBRNA2T00109435001	BnaC09g03330D	GSBRNA2G00109435001	GSBRNA2G00109435001	chrC09:1878892-1881342	UP	PC20	OK	0.372415	19.6802	5.72369	5.03663	0.0004	0.0180197	yes
GSBRNA2T00145168001	BnaC08g01520D	GSBRNA2G00145168001	GSBRNA2G00145168001	chrC08:1194668-1197423	UP	PC20	OK	0.364753	19.3289	5.7277	4.73137	0.0014	0.0478684	yes
GSBRNA2T00061417001	BnaA06g20250D	GSBRNA2G00061417001	GSBRNA2G00061417001	chrA06:13355339-13358400	UP	PC20	OK	0.853214	45.637	5.74115	5.85011	5e-05	0.00315052	yes
GSBRNA2T00057385001	BnaA09g47550D	GSBRNA2G00057385001	GSBRNA2G00057385001	chrA09:32017248-32018865	UP	PC20	OK	0.810689	43.3649	5.74123	5.71096	5e-05	0.00315052	yes
GSBRNA2T00051169001	BnaA08g30830D	GSBRNA2G00051169001	GSBRNA2G00051169001	chrA08_random:1721573-1722322	UP	PC20	OK	3.82898	204.831	5.74133	6.1298	5e-05	0.00315052	yes
GSBRNA2T00061117001	BnaC03g60420D	GSBRNA2G00061117001	GSBRNA2G00061117001	chrC03:49575467-49578085	UP	PC20	OK	0.553256	29.61	5.74199	6.05781	5e-05	0.00315052	yes
GSBRNA2T00002764001	BnaC05g02570D	GSBRNA2G00002764001	GSBRNA2G00002764001	chrC05:1250504-1254969	UP	PC20	OK	0.28785	15.4135	5.74273	5.50088	5e-05	0.00315052	yes
GSBRNA2T00135745001	BnaA10g20620D	GSBRNA2G00135745001	GSBRNA2G00135745001	chrA10:14361103-14364245	UP	PC20	OK	0.952334	51.1633	5.7475	6.21468	5e-05	0.00315052	yes
GSBRNA2T00147238001	BnaC03g54480D	GSBRNA2G00147238001	GSBRNA2G00147238001	chrC03:42276624-42279681	UP	PC20	OK	0.785433	42.2863	5.75056	5.76585	5e-05	0.00315052	yes
GSBRNA2T00127081001	BnaC08g32060D	GSBRNA2G00127081001	GSBRNA2G00127081001	chrC08:31234992-31235643	UP	PC20	OK	0.981269	52.8953	5.75235	5.51556	0.00075	0.0297778	yes
GSBRNA2T00079842001	BnaAnng28400D	GSBRNA2G00079842001	GSBRNA2G00079842001	chrAnn_random:32449232-32452545	UP	PC20	OK	0.363331	19.6208	5.75495	5.69417	5e-05	0.00315052	yes
GSBRNA2T00006359001	BnaA04g18240D	GSBRNA2G00006359001	GSBRNA2G00006359001	chrA04:14663071-14666035	UP	PC20	OK	0.363882	19.6897	5.75782	5.23172	0.001	0.0370366	yes
GSBRNA2T00035758001	BnaC09g09390D	GSBRNA2G00035758001	GSBRNA2G00035758001	chrC09:6095044-6097337	UP	PC20	OK	1.07828	58.472	5.76095	6.2504	5e-05	0.00315052	yes
GSBRNA2T00059183001	BnaC03g58660D	GSBRNA2G00059183001	GSBRNA2G00059183001	chrC03:47939396-47941032	UP	PC20	OK	0.709695	38.5922	5.76497	4.78793	0.0004	0.0180197	yes
GSBRNA2T00071506001	BnaA03g53200D	GSBRNA2G00071506001	GSBRNA2G00071506001	chrA03:27891413-27893438	UP	PC20	OK	0.329545	17.957	5.76793	4.67479	0.0011	0.0398877	yes
GSBRNA2T00045045001	BnaA09g09160D	GSBRNA2G00045045001	GSBRNA2G00045045001	chrA09:4567441-4569663	UP	PC20	OK	0.854194	46.6972	5.77263	5.63421	5e-05	0.00315052	yes
GSBRNA2T00088001001	BnaA02g16670D	GSBRNA2G00088001001	GSBRNA2G00088001001	chrA02:9958064-9959863	UP	PC20	OK	0.931332	51.1862	5.78032	5.56878	5e-05	0.00315052	yes
GSBRNA2T00137700001	BnaA03g32800D	GSBRNA2G00137700001	GSBRNA2G00137700001	chrA03:15835061-15837447	UP	PC20	OK	0.882995	48.9276	5.7921	6.15854	5e-05	0.00315052	yes
GSBRNA2T00002667001	BnaC05g01680D	GSBRNA2G00002667001	GSBRNA2G00002667001	chrC05:854357-856305	UP	PC20	OK	0.430415	24.0111	5.80183	5.23897	0.0013	0.0453439	yes
GSBRNA2T00044281001	BnaA03g48660D	GSBRNA2G00044281001	GSBRNA2G00044281001	chrA03:24953213-24953825	UP	PC20	OK	3.62206	202.345	5.80386	5.64258	5e-05	0.00315052	yes
GSBRNA2T00141693001	BnaC03g50220D	GSBRNA2G00141693001	GSBRNA2G00141693001	chrC03:34901995-34905678	UP	PC20	OK	0.236072	13.1971	5.80485	5.71808	0.00015	0.00807736	yes
GSBRNA2T00071549001	BnaC03g33860D	GSBRNA2G00071549001	GSBRNA2G00071549001	chrC03:20600155-20601719	UP	PC20	OK	1.69078	94.6404	5.80669	6.27021	5e-05	0.00315052	yes
GSBRNA2T00054757001	BnaA06g35670D	GSBRNA2G00054757001	GSBRNA2G00054757001	chrA06:23426776-23427769	UP	PC20	OK	1.47306	82.9568	5.81547	5.69132	5e-05	0.00315052	yes
GSBRNA2T00069259001	BnaCnng57640D	GSBRNA2G00069259001	GSBRNA2G00069259001	chrCnn_random:57387274-57389826	UP	PC20	OK	0.531547	29.9455	5.816	4.91398	0.0012	0.0424975	yes
GSBRNA2T00099470001	BnaA07g22480D	GSBRNA2G00099470001	GSBRNA2G00099470001	chrA07:17137950-17143065	UP	PC20	OK	0.353064	19.9928	5.82341	5.82469	5e-05	0.00315052	yes
GSBRNA2T00061111001	BnaC03g60370D	GSBRNA2G00061111001	GSBRNA2G00061111001	chrC03:49558760-49561334	UP	PC20	OK	0.61244	34.6861	5.82365	6.13185	5e-05	0.00315052	yes
GSBRNA2T00149961001	BnaC03g45190D	GSBRNA2G00149961001	GSBRNA2G00149961001	chrC03:30197603-30198824	UP	PC20	OK	0.628373	35.5909	5.82374	4.97014	0.0012	0.0424975	yes
GSBRNA2T00086855001	BnaA01g22900D	GSBRNA2G00086855001	GSBRNA2G00086855001	chrA01:15244579-15246305	UP	PC20	OK	0.675708	38.2746	5.82384	5.76019	5e-05	0.00315052	yes
GSBRNA2T00024068001	BnaC04g43840D	GSBRNA2G00024068001	GSBRNA2G00024068001	chrC04:44098354-44102576	UP	PC20	OK	0.310091	17.6591	5.83158	5.6416	5e-05	0.00315052	yes
GSBRNA2T00154928001	BnaA03g37560D	GSBRNA2G00154928001	GSBRNA2G00154928001	chrA03:18625003-18628657	UP	PC20	OK	0.125508	7.16947	5.83601	5.18322	0.0009	0.034061	yes
GSBRNA2T00029528001	BnaA05g18860D	GSBRNA2G00029528001	GSBRNA2G00029528001	chrA05:14273815-14274169	UP	PC20	OK	3.64176	208.533	5.8395	7.09252	0.0005	0.0215827	yes
GSBRNA2T00089849001	BnaA07g08200D	GSBRNA2G00089849001	GSBRNA2G00089849001	chrA07:8344424-8345581	UP	PC20	OK	0.693544	39.7144	5.83953	4.63717	0.00145	0.0490936	yes
GSBRNA2T00093833001	BnaCnng18160D	GSBRNA2G00093833001	GSBRNA2G00093833001	chrCnn_random:16936989-16938582	UP	PC20	OK	2.51248	143.894	5.83975	6.24328	5e-05	0.00315052	yes
GSBRNA2T00157538001	BnaC01g17820D	GSBRNA2G00157538001	GSBRNA2G00157538001	chrC01:12247230-12251456	UP	PC20	OK	1.08919	62.4795	5.84206	5.97637	5e-05	0.00315052	yes
GSBRNA2T00121417001	BnaA01g01830D	GSBRNA2G00121417001	GSBRNA2G00121417001	chrA01:941867-942626	UP	PC20	OK	1.81816	104.712	5.84781	5.79641	5e-05	0.00315052	yes
GSBRNA2T00149415001	BnaA01g16670D	GSBRNA2G00149415001	GSBRNA2G00149415001	chrA01:8692976-8694694	UP	PC20	OK	0.829809	47.8202	5.8487	6.21575	5e-05	0.00315052	yes
GSBRNA2T00007840001	BnaCnng23280D	GSBRNA2G00007840001	GSBRNA2G00007840001	chrCnn_random:21839172-21839727	UP	PC20	OK	2.1143	122.266	5.8537	4.69575	0.00115	0.0413608	yes
GSBRNA2T00009517001	BnaA09g04230D	GSBRNA2G00009517001	GSBRNA2G00009517001	chrA09:2092283-2092529	UP	PC20	OK	60.8041	3521.77	5.85599	7.82095	5e-05	0.00315052	yes
GSBRNA2T00007569001	BnaC09g51360D	GSBRNA2G00007569001	GSBRNA2G00007569001	chrC09_random:502162-506944	UP	PC20	OK	3.72372	216.521	5.86162	6.10222	5e-05	0.00315052	yes
GSBRNA2T00145932001	BnaC09g03610D	GSBRNA2G00145932001	GSBRNA2G00145932001	chrC09:2060734-2060962	UP	PC20	OK	41.9022	2438.84	5.86303	6.29753	5e-05	0.00315052	yes
GSBRNA2T00150427001	BnaA10g01390D	GSBRNA2G00150427001	GSBRNA2G00150427001	chrA10:738266-740715	UP	PC20	OK	2.65875	154.912	5.86456	5.81396	5e-05	0.00315052	yes
GSBRNA2T00147846001	BnaC06g37750D	GSBRNA2G00147846001	GSBRNA2G00147846001	chrC06:35644119-35644878	UP	PC20	OK	2.72674	159.006	5.86576	5.93725	5e-05	0.00315052	yes
GSBRNA2T00073359001	BnaC02g34750D	GSBRNA2G00073359001	GSBRNA2G00073359001	chrC02:37391216-37393552	UP	PC20	OK	1.14176	66.6051	5.8663	6.38197	5e-05	0.00315052	yes
GSBRNA2T00071612001	BnaC03g34360D	GSBRNA2G00071612001	GSBRNA2G00071612001	chrC03:20839388-20840047	UP	PC20	OK	2.27202	132.76	5.86871	5.72337	5e-05	0.00315052	yes
GSBRNA2T00064823001	BnaC04g31430D	GSBRNA2G00064823001	GSBRNA2G00064823001	chrC04:33318014-33320723	UP	PC20	OK	0.368757	21.58	5.87088	4.97092	0.0012	0.0424975	yes
GSBRNA2T00131351001	BnaA01g09410D	GSBRNA2G00131351001	GSBRNA2G00131351001	chrA01:4607771-4608290	UP	PC20	OK	4.67673	276.757	5.88698	6.21926	5e-05	0.00315052	yes
GSBRNA2T00048429001	BnaA05g16950D	GSBRNA2G00048429001	GSBRNA2G00048429001	chrA05:11738028-11740890	UP	PC20	OK	0.826489	48.9163	5.88718	5.84193	5e-05	0.00315052	yes
GSBRNA2T00125437001	BnaA06g15820D	GSBRNA2G00125437001	GSBRNA2G00125437001	chrA06:8684158-8684921	UP	PC20	OK	10.5819	629.186	5.89382	5.83992	5e-05	0.00315052	yes
GSBRNA2T00058379001	BnaA03g19650D	GSBRNA2G00058379001	GSBRNA2G00058379001	chrA03:9316135-9316572	UP	PC20	OK	16.9458	1011.05	5.89879	6.5605	5e-05	0.00315052	yes
GSBRNA2T00034799001	BnaC06g10490D	GSBRNA2G00034799001	GSBRNA2G00034799001	chrC06:12652823-12653908	UP	PC20	OK	1.64454	98.3467	5.90212	5.92153	0.0003	0.014397	yes
GSBRNA2T00121761001	BnaC08g21170D	GSBRNA2G00121761001	GSBRNA2G00121761001	chrC08:23753409-23754167	UP	PC20	OK	12.2148	734.553	5.91016	5.2293	5e-05	0.00315052	yes
GSBRNA2T00123615001	BnaC03g37900D	GSBRNA2G00123615001	GSBRNA2G00123615001	chrC03:23187171-23189541	UP	PC20	OK	0.88591	53.6777	5.92102	6.2523	5e-05	0.00315052	yes
GSBRNA2T00038181001	BnaC04g51500D	GSBRNA2G00038181001	GSBRNA2G00038181001	chrC04:48806540-48807479	UP	PC20	OK	5.12731	311.268	5.92381	6.33759	5e-05	0.00315052	yes
GSBRNA2T00149616001	BnaA01g15090D	GSBRNA2G00149616001	GSBRNA2G00149616001	chrA01:7692787-7696164	UP	PC20	OK	1.199	72.9443	5.9269	5.99176	5e-05	0.00315052	yes
GSBRNA2T00012909001	BnaA02g08480D	GSBRNA2G00012909001	GSBRNA2G00012909001	chrA02:4133018-4137651	UP	PC20	OK	1.90105	116.416	5.93635	6.31083	5e-05	0.00315052	yes
GSBRNA2T00010703001	BnaA02g07080D	GSBRNA2G00010703001	GSBRNA2G00010703001	chrA02:3356024-3358401	UP	PC20	OK	0.48721	29.8422	5.93667	5.46086	0.0007	0.0284206	yes
GSBRNA2T00112084001	BnaA03g27560D	GSBRNA2G00112084001	GSBRNA2G00112084001	chrA03:13562108-13562743	UP	PC20	OK	4.18871	257.148	5.93995	6.22488	5e-05	0.00315052	yes
GSBRNA2T00104170001	BnaC09g44510D	GSBRNA2G00104170001	GSBRNA2G00104170001	chrC09:45288733-45291079	UP	PC20	OK	0.349388	21.5089	5.94396	5.78628	0.00015	0.00807736	yes
GSBRNA2T00116083001	BnaC01g16500D	GSBRNA2G00116083001	GSBRNA2G00116083001	chrC01:11313530-11314792	UP	PC20	OK	10.8547	672.365	5.95285	5.55122	5e-05	0.00315052	yes
GSBRNA2T00154052001	BnaA05g20840D	GSBRNA2G00154052001	GSBRNA2G00154052001	chrA05:16175496-16177949	UP	PC20	OK	0.514717	31.9436	5.9556	4.84484	0.00125	0.0440112	yes
GSBRNA2T00003714001	BnaA03g58450D	GSBRNA2G00003714001	GSBRNA2G00003714001	chrA03_random:1686387-1689592	UP	PC20	OK	3.37895	211.093	5.96516	5.28443	5e-05	0.00315052	yes
GSBRNA2T00061514001	BnaA06g19910D	GSBRNA2G00061514001	GSBRNA2G00061514001	chrA06:12609413-12612427	UP	PC20	OK	0.470841	29.4547	5.96711	5.02263	0.00065	0.0268169	yes
GSBRNA2T00150900001	BnaA08g16670D	GSBRNA2G00150900001	GSBRNA2G00150900001	chrA08:13501183-13504036	UP	PC20	OK	0.400202	25.0357	5.96712	5.91688	0.0002	0.0102143	yes
GSBRNA2T00018226001	BnaC09g00100D	GSBRNA2G00018226001	GSBRNA2G00018226001	chrC09:55457-58259	UP	PC20	OK	0.324422	20.431	5.97675	5.26973	0.0013	0.0453439	yes
GSBRNA2T00017053001	BnaA01g36400D	GSBRNA2G00017053001	GSBRNA2G00017053001	chrA01_random:1960991-1965651	UP	PC20	OK	0.573884	36.1783	5.97822	6.22221	5e-05	0.00315052	yes
GSBRNA2T00153606001	BnaC03g32670D	GSBRNA2G00153606001	GSBRNA2G00153606001	chrC03:20021785-20027056	UP	PC20	OK	0.333533	21.0606	5.98057	5.88202	5e-05	0.00315052	yes
GSBRNA2T00112086001	BnaA03g27540D	GSBRNA2G00112086001	GSBRNA2G00112086001	chrA03:13552850-13555231	UP	PC20	OK	2.7155	171.688	5.98242	5.95079	5e-05	0.00315052	yes
GSBRNA2T00085465001	BnaC05g01430D	GSBRNA2G00085465001	GSBRNA2G00085465001	chrC05:746688-748532	UP	PC20	OK	5.79251	367.708	5.98823	5.35026	5e-05	0.00315052	yes
GSBRNA2T00150563001	BnaA10g00230D	GSBRNA2G00150563001	GSBRNA2G00150563001	chrA10:143341-144786	UP	PC20	OK	0.608868	38.6529	5.9883	5.39104	0.00035	0.0162035	yes
GSBRNA2T00088645001	BnaA04g26890D	GSBRNA2G00088645001	GSBRNA2G00088645001	chrA04:19011277-19012195	UP	PC20	OK	5.82465	370.557	5.99138	6.13647	5e-05	0.00315052	yes
GSBRNA2T00081382001	BnaA02g04760D	GSBRNA2G00081382001	GSBRNA2G00081382001	chrA02:2113033-2114146	UP	PC20	OK	3.24389	208.247	6.00443	5.96251	5e-05	0.00315052	yes
GSBRNA2T00052781001	BnaA02g07920D	GSBRNA2G00052781001	GSBRNA2G00052781001	chrA02:3750092-3753377	UP	PC20	OK	1.53798	98.7731	6.00501	6.62964	5e-05	0.00315052	yes
GSBRNA2T00128143001	BnaC08g03920D	GSBRNA2G00128143001	GSBRNA2G00128143001	chrC08:4093752-4094286	UP	PC20	OK	4.6364	298.193	6.0071	6.64699	5e-05	0.00315052	yes
GSBRNA2T00056333001	BnaA01g14010D	GSBRNA2G00056333001	GSBRNA2G00056333001	chrA01:7116843-7118074	UP	PC20	OK	14.6722	943.878	6.00745	4.09649	0.00095	0.0355101	yes
GSBRNA2T00087683001	BnaA01g22700D	GSBRNA2G00087683001	GSBRNA2G00087683001	chrA01:15012168-15012396	UP	PC20	OK	20.7781	1338.75	6.00968	5.81456	5e-05	0.00315052	yes
GSBRNA2T00084595001	BnaC04g47440D	GSBRNA2G00084595001	GSBRNA2G00084595001	chrC04:46420608-46422489	UP	PC20	OK	0.438241	28.3398	6.01496	5.07994	0.0004	0.0180197	yes
GSBRNA2T00081068001	BnaA02g04170D	GSBRNA2G00081068001	GSBRNA2G00081068001	chrA02:1865798-1868113	UP	PC20	OK	0.989318	63.9954	6.01539	6.33005	5e-05	0.00315052	yes
GSBRNA2T00151985001	BnaC02g04170D	GSBRNA2G00151985001	GSBRNA2G00151985001	chrC02:2121743-2125617	UP	PC20	OK	0.590944	38.2381	6.01584	6.09576	5e-05	0.00315052	yes
GSBRNA2T00000167001	BnaA05g26490D	GSBRNA2G00000167001	GSBRNA2G00000167001	chrA05:19394218-19396152	UP	PC20	OK	0.976819	63.2545	6.01693	5.86975	5e-05	0.00315052	yes
GSBRNA2T00089606001	BnaA08g27230D	GSBRNA2G00089606001	GSBRNA2G00089606001	chrA08:18216369-18218234	UP	PC20	OK	10.584	686.299	6.01888	3.94623	0.0001	0.00574178	yes
GSBRNA2T00142849001	BnaC07g25300D	GSBRNA2G00142849001	GSBRNA2G00142849001	chrC07:31457934-31459374	UP	PC20	OK	6.03647	391.899	6.02063	5.54841	5e-05	0.00315052	yes
GSBRNA2T00003335001	BnaA06g01350D	GSBRNA2G00003335001	GSBRNA2G00003335001	chrA06:843096-844135	UP	PC20	OK	1.59002	103.908	6.03013	5.08682	0.0012	0.0424975	yes
GSBRNA2T00099032001	BnaA07g18750D	GSBRNA2G00099032001	GSBRNA2G00099032001	chrA07:15212495-15213819	UP	PC20	OK	2.49154	163.217	6.03362	6.05846	5e-05	0.00315052	yes
GSBRNA2T00100059001	BnaC07g45470D	GSBRNA2G00100059001	GSBRNA2G00100059001	chrC07:43528788-43530787	UP	PC20	OK	0.52401	34.3609	6.03503	5.5309	5e-05	0.00315052	yes
GSBRNA2T00041326001	BnaCnng05800D	GSBRNA2G00041326001	GSBRNA2G00041326001	chrCnn_random:5354794-5361680	UP	PC20	OK	1.56739	103.095	6.03947	6.27118	5e-05	0.00315052	yes
GSBRNA2T00065059001	BnaCnng08650D	GSBRNA2G00065059001	GSBRNA2G00065059001	chrCnn_random:8087173-8087905	UP	PC20	OK	2.53318	166.885	6.04176	6.30235	5e-05	0.00315052	yes
GSBRNA2T00053804001	BnaC09g22170D	GSBRNA2G00053804001	GSBRNA2G00053804001	chrC09:19459400-19462525	UP	PC20	OK	3.02249	199.844	6.04699	6.64069	5e-05	0.00315052	yes
GSBRNA2T00020917001	BnaCnng31830D	GSBRNA2G00020917001	GSBRNA2G00020917001	chrCnn_random:30249218-30249483	UP	PC20	OK	22.7131	1505.08	6.05017	6.23294	5e-05	0.00315052	yes
GSBRNA2T00113661001	BnaA03g39260D	GSBRNA2G00113661001	GSBRNA2G00113661001	chrA03:19570110-19575083	UP	PC20	OK	0.409221	27.3185	6.06085	6.14326	5e-05	0.00315052	yes
GSBRNA2T00018283001	BnaC09g00590D	GSBRNA2G00018283001	GSBRNA2G00018283001	chrC09:293783-294242	UP	PC20	OK	2.58941	173.707	6.06789	6.00058	0.0001	0.00574178	yes
GSBRNA2T00057082001	BnaC08g41880D	GSBRNA2G00057082001	GSBRNA2G00057082001	chrC08:36260198-36260615	UP	PC20	OK	3.00586	201.91	6.0698	5.13549	0.0004	0.0180197	yes
GSBRNA2T00150685001	BnaA08g18330D	GSBRNA2G00150685001	GSBRNA2G00150685001	chrA08:14366607-14368376	UP	PC20	OK	10.3115	693.155	6.07085	4.2764	5e-05	0.00315052	yes
GSBRNA2T00144556001	BnaA06g31320D	GSBRNA2G00144556001	GSBRNA2G00144556001	chrA06:21077203-21079483	UP	PC20	OK	4.48355	301.429	6.07104	3.83475	0.0005	0.0215827	yes
GSBRNA2T00025698001	BnaC08g50140D	GSBRNA2G00025698001	GSBRNA2G00025698001	chrC08_random:4498766-4500967	UP	PC20	OK	0.760356	51.2444	6.07458	6.36066	5e-05	0.00315052	yes
GSBRNA2T00101250001	BnaC01g33660D	GSBRNA2G00101250001	GSBRNA2G00101250001	chrC01:32860482-32863240	UP	PC20	OK	0.464704	31.3226	6.07475	5.28679	5e-05	0.00315052	yes
GSBRNA2T00089350001	BnaC04g22130D	GSBRNA2G00089350001	GSBRNA2G00089350001	chrC04:23268052-23270133	UP	PC20	OK	0.505661	34.0967	6.07532	4.82036	0.00145	0.0490936	yes
GSBRNA2T00070219001	BnaA02g13590D	GSBRNA2G00070219001	GSBRNA2G00070219001	chrA02:7458165-7459260	UP	PC20	OK	0.780858	52.6844	6.07617	5.71168	0.0001	0.00574178	yes
GSBRNA2T00135080001	BnaC02g17750D	GSBRNA2G00135080001	GSBRNA2G00135080001	chrC02:13362886-13364063	UP	PC20	OK	0.8762	59.1434	6.07681	5.67451	5e-05	0.00315052	yes
GSBRNA2T00154297001	BnaA10g15570D	GSBRNA2G00154297001	GSBRNA2G00154297001	chrA10:12053350-12055831	UP	PC20	OK	7.5166	508.92	6.08121	4.52112	5e-05	0.00315052	yes
GSBRNA2T00101037001	BnaC04g28060D	GSBRNA2G00101037001	GSBRNA2G00101037001	chrC04:29471180-29473081	UP	PC20	OK	3.02198	204.882	6.08316	6.04574	5e-05	0.00315052	yes
GSBRNA2T00037942001	BnaCnng41410D	GSBRNA2G00037942001	GSBRNA2G00037942001	chrCnn_random:40227123-40227543	UP	PC20	OK	5.26538	357.797	6.08646	5.98829	5e-05	0.00315052	yes
GSBRNA2T00023807001	BnaC05g39980D	GSBRNA2G00023807001	GSBRNA2G00023807001	chrC05:38312815-38315047	UP	PC20	OK	2.47122	167.999	6.08708	6.29458	5e-05	0.00315052	yes
GSBRNA2T00029427001	BnaC01g29960D	GSBRNA2G00029427001	GSBRNA2G00029427001	chrC01:28368543-28370450	UP	PC20	OK	0.730752	49.6825	6.08721	5.9541	5e-05	0.00315052	yes
GSBRNA2T00086218001	BnaCnng14580D	GSBRNA2G00086218001	GSBRNA2G00086218001	chrCnn_random:13512548-13513348	UP	PC20	OK	3.83114	260.75	6.08875	6.33863	5e-05	0.00315052	yes
GSBRNA2T00037295001	BnaC04g50470D	GSBRNA2G00037295001	GSBRNA2G00037295001	chrC04:48136286-48137631	UP	PC20	OK	0.721172	49.0918	6.089	5.02248	0.0011	0.0398877	yes
GSBRNA2T00006022001	BnaAnng03110D	GSBRNA2G00006022001	GSBRNA2G00006022001	chrAnn_random:2479088-2480144	UP	PC20	OK	1.13987	77.7989	6.09281	5.97366	5e-05	0.00315052	yes
GSBRNA2T00077121001	BnaCnng60280D	GSBRNA2G00077121001	GSBRNA2G00077121001	chrCnn_random:60038806-60040960	UP	PC20	OK	2.81816	192.796	6.09618	6.00663	5e-05	0.00315052	yes
GSBRNA2T00065186001	BnaAnng24780D	GSBRNA2G00065186001	GSBRNA2G00065186001	chrAnn_random:28652830-28655114	UP	PC20	OK	1.80575	123.728	6.09843	5.82681	5e-05	0.00315052	yes
GSBRNA2T00057403001	BnaA09g47690D	GSBRNA2G00057403001	GSBRNA2G00057403001	chrA09:32114726-32115889	UP	PC20	OK	0.55796	38.2929	6.10077	5.51529	0.0012	0.0424975	yes
GSBRNA2T00133749001	BnaC07g28310D	GSBRNA2G00133749001	GSBRNA2G00133749001	chrC07:33479806-33482229	UP	PC20	OK	0.403246	27.7616	6.10529	6.0008	5e-05	0.00315052	yes
GSBRNA2T00055941001	BnaC03g62750D	GSBRNA2G00055941001	GSBRNA2G00055941001	chrC03:51995539-51996921	UP	PC20	OK	1.95577	134.668	6.10553	6.17738	5e-05	0.00315052	yes
GSBRNA2T00092678001	BnaA03g50770D	GSBRNA2G00092678001	GSBRNA2G00092678001	chrA03:26372941-26375158	UP	PC20	OK	0.726398	50.1936	6.1106	6.32877	5e-05	0.00315052	yes
GSBRNA2T00121876001	BnaA09g37510D	GSBRNA2G00121876001	GSBRNA2G00121876001	chrA09:26976173-26977760	UP	PC20	OK	2.85996	197.958	6.11305	6.05965	5e-05	0.00315052	yes
GSBRNA2T00114719001	BnaC02g08380D	GSBRNA2G00114719001	GSBRNA2G00114719001	chrC02:4555546-4558437	UP	PC20	OK	0.348867	24.15	6.1132	5.11643	0.0013	0.0453439	yes
GSBRNA2T00132757001	BnaA05g02520D	GSBRNA2G00132757001	GSBRNA2G00132757001	chrA05:1384992-1386814	UP	PC20	OK	1.48664	103.136	6.11635	5.79249	5e-05	0.00315052	yes
GSBRNA2T00109746001	BnaA06g21100D	GSBRNA2G00109746001	GSBRNA2G00109746001	chrA06:14654726-14655146	UP	PC20	OK	3.65329	253.559	6.11698	6.10804	5e-05	0.00315052	yes
GSBRNA2T00078774001	BnaA08g13410D	GSBRNA2G00078774001	GSBRNA2G00078774001	chrA08:11621550-11622840	UP	PC20	OK	2.06663	143.518	6.11781	6.18633	5e-05	0.00315052	yes
GSBRNA2T00137442001	BnaA03g34960D	GSBRNA2G00137442001	GSBRNA2G00137442001	chrA03:17053224-17056487	UP	PC20	OK	0.510119	35.7246	6.12994	6.04194	5e-05	0.00315052	yes
GSBRNA2T00042034001	BnaC09g15570D	GSBRNA2G00042034001	GSBRNA2G00042034001	chrC09:12390261-12391530	UP	PC20	OK	0.766695	53.7706	6.13202	6.00421	5e-05	0.00315052	yes
GSBRNA2T00028596001	BnaA03g59650D	GSBRNA2G00028596001	GSBRNA2G00028596001	chrA03_random:3711565-3713635	UP	PC20	OK	0.873295	61.2582	6.13229	5.85144	5e-05	0.00315052	yes
GSBRNA2T00058434001	BnaA03g19250D	GSBRNA2G00058434001	GSBRNA2G00058434001	chrA03:9095209-9097196	UP	PC20	OK	0.536038	37.6486	6.13412	5.9189	5e-05	0.00315052	yes
GSBRNA2T00064675001	BnaA10g05640D	GSBRNA2G00064675001	GSBRNA2G00064675001	chrA10:3437742-3438667	UP	PC20	OK	2.72127	191.352	6.13581	6.38697	5e-05	0.00315052	yes
GSBRNA2T00071362001	BnaC06g14040D	GSBRNA2G00071362001	GSBRNA2G00071362001	chrC06:16889001-16890615	UP	PC20	OK	3.46425	243.733	6.13662	5.41394	5e-05	0.00315052	yes
GSBRNA2T00057320001	BnaA09g41420D	GSBRNA2G00057320001	GSBRNA2G00057320001	chrA09:28945071-28948675	UP	PC20	OK	0.92835	65.519	6.1411	6.31465	5e-05	0.00315052	yes
GSBRNA2T00064714001	BnaC04g00460D	GSBRNA2G00064714001	GSBRNA2G00064714001	chrC04:370686-372710	UP	PC20	OK	5.62095	397.163	6.14277	4.26174	0.0005	0.0215827	yes
GSBRNA2T00108951001	BnaC08g25550D	GSBRNA2G00108951001	GSBRNA2G00108951001	chrC08:27233984-27238109	UP	PC20	OK	1.05871	74.8977	6.14454	6.62912	5e-05	0.00315052	yes
GSBRNA2T00015842001	BnaC03g27530D	GSBRNA2G00015842001	GSBRNA2G00015842001	chrC03:16008363-16009604	UP	PC20	OK	0.533092	37.7806	6.14712	5.71613	0.00025	0.0123267	yes
GSBRNA2T00021776001	BnaA04g05320D	GSBRNA2G00021776001	GSBRNA2G00021776001	chrA04:4106721-4109488	UP	PC20	OK	1.69735	120.335	6.14764	6.57764	5e-05	0.00315052	yes
GSBRNA2T00009850001	BnaA09g02340D	GSBRNA2G00009850001	GSBRNA2G00009850001	chrA09:1191116-1191977	UP	PC20	OK	3.6975	262.605	6.1502	6.36807	5e-05	0.00315052	yes
GSBRNA2T00008748001	BnaAnng12170D	GSBRNA2G00008748001	GSBRNA2G00008748001	chrAnn_random:13184824-13189220	UP	PC20	OK	0.429411	30.5483	6.15259	6.37164	5e-05	0.00315052	yes
GSBRNA2T00153567001	BnaC03g32350D	GSBRNA2G00153567001	GSBRNA2G00153567001	chrC03:19884600-19887518	UP	PC20	OK	1.31923	94.1434	6.15709	6.51745	5e-05	0.00315052	yes
GSBRNA2T00041437001	BnaA02g09800D	GSBRNA2G00041437001	GSBRNA2G00041437001	chrA02:4908408-4910182	UP	PC20	OK	0.496377	35.4413	6.15785	5.5399	0.00035	0.0162035	yes
GSBRNA2T00113709001	BnaA03g38910D	GSBRNA2G00113709001	GSBRNA2G00113709001	chrA03:19347039-19349443	UP	PC20	OK	0.612356	43.7746	6.15958	5.64761	5e-05	0.00315052	yes
GSBRNA2T00008436001	BnaC03g73850D	GSBRNA2G00008436001	GSBRNA2G00008436001	chrC03_random:1882002-1885293	UP	PC20	OK	0.371069	26.552	6.16099	5.55313	5e-05	0.00315052	yes
GSBRNA2T00055435001	BnaA02g30620D	GSBRNA2G00055435001	GSBRNA2G00055435001	chrA02:22119789-22122345	UP	PC20	OK	4.6698	334.591	6.16289	4.24367	0.00025	0.0123267	yes
GSBRNA2T00016586001	BnaC02g44910D	GSBRNA2G00016586001	GSBRNA2G00016586001	chrC02_random:703214-707021	UP	PC20	OK	0.44703	32.1489	6.16825	5.99699	5e-05	0.00315052	yes
GSBRNA2T00079392001	BnaA05g25900D	GSBRNA2G00079392001	GSBRNA2G00079392001	chrA05:19072075-19074317	UP	PC20	OK	2.89456	208.293	6.16913	5.60568	5e-05	0.00315052	yes
GSBRNA2T00113071001	BnaC06g29240D	GSBRNA2G00113071001	GSBRNA2G00113071001	chrC06:30267734-30268808	UP	PC20	OK	0.701608	50.5462	6.17079	5.58017	5e-05	0.00315052	yes
GSBRNA2T00100044001	BnaC07g45340D	GSBRNA2G00100044001	GSBRNA2G00100044001	chrC07:43470227-43474640	UP	PC20	OK	2.31256	166.609	6.17083	5.55184	5e-05	0.00315052	yes
GSBRNA2T00067730001	BnaC05g10650D	GSBRNA2G00067730001	GSBRNA2G00067730001	chrC05:6125134-6127180	UP	PC20	OK	3.46392	249.817	6.17233	5.4622	5e-05	0.00315052	yes
GSBRNA2T00007829001	BnaC02g47960D	GSBRNA2G00007829001	GSBRNA2G00007829001	chrC02_random:4073097-4075518	UP	PC20	OK	1.36712	98.6672	6.17336	6.17482	5e-05	0.00315052	yes
GSBRNA2T00101719001	BnaC05g35370D	GSBRNA2G00101719001	GSBRNA2G00101719001	chrC05:34656836-34657873	UP	PC20	OK	1.14606	82.8294	6.17539	6.05313	5e-05	0.00315052	yes
GSBRNA2T00126934001	BnaA08g08890D	GSBRNA2G00126934001	GSBRNA2G00126934001	chrA08:8613718-8614952	UP	PC20	OK	2.22458	160.931	6.17677	6.22272	5e-05	0.00315052	yes
GSBRNA2T00026279001	BnaC01g37680D	GSBRNA2G00026279001	GSBRNA2G00026279001	chrC01:36968831-36971523	UP	PC20	OK	6.44009	466.133	6.17752	4.87323	0.00015	0.00807736	yes
GSBRNA2T00074030001	BnaC04g00950D	GSBRNA2G00074030001	GSBRNA2G00074030001	chrC04:778955-780317	UP	PC20	OK	0.989564	71.6269	6.17756	6.25704	5e-05	0.00315052	yes
GSBRNA2T00022521001	BnaCnng75130D	GSBRNA2G00022521001	GSBRNA2G00022521001	chrCnn_random:76107204-76108909	UP	PC20	OK	3.26121	237.77	6.18802	6.15407	5e-05	0.00315052	yes
GSBRNA2T00086320001	BnaC01g27710D	GSBRNA2G00086320001	GSBRNA2G00086320001	chrC01:25347034-25348589	UP	PC20	OK	1.2973	95.5549	6.20274	6.52828	5e-05	0.00315052	yes
GSBRNA2T00055386001	BnaA02g31020D	GSBRNA2G00055386001	GSBRNA2G00055386001	chrA02:22407993-22410773	UP	PC20	OK	0.255245	18.8589	6.20722	5.33323	0.001	0.0370366	yes
GSBRNA2T00126366001	BnaA04g03610D	GSBRNA2G00126366001	GSBRNA2G00126366001	chrA04:2458405-2460621	UP	PC20	OK	2.8473	210.468	6.20786	6.36368	5e-05	0.00315052	yes
GSBRNA2T00141837001	BnaA03g16500D	GSBRNA2G00141837001	GSBRNA2G00141837001	chrA03:7712441-7714700	UP	PC20	OK	0.482326	35.6885	6.20931	5.20264	0.00145	0.0490936	yes
GSBRNA2T00025406001	BnaC09g38100D	GSBRNA2G00025406001	GSBRNA2G00025406001	chrC09:41110266-41112599	UP	PC20	OK	6.61257	492.905	6.21995	4.69766	0.0001	0.00574178	yes
GSBRNA2T00096788001	BnaA03g56990D	GSBRNA2G00096788001	GSBRNA2G00096788001	chrA03_random:950826-952038	UP	PC20	OK	0.771636	57.5315	6.22029	6.03737	5e-05	0.00315052	yes
GSBRNA2T00099138001	BnaA07g19700D	GSBRNA2G00099138001	GSBRNA2G00099138001	chrA07:15670424-15673162	UP	PC20	OK	0.358259	26.8437	6.22744	5.51467	0.0007	0.0284206	yes
GSBRNA2T00153670001	BnaC03g33160D	GSBRNA2G00153670001	GSBRNA2G00153670001	chrC03:20253717-20256112	UP	PC20	OK	0.567217	42.5929	6.23057	6.25477	5e-05	0.00315052	yes
GSBRNA2T00070573001	BnaA09g13680D	GSBRNA2G00070573001	GSBRNA2G00070573001	chrA09:7785550-7786049	UP	PC20	OK	5.35172	402.128	6.23151	6.08948	5e-05	0.00315052	yes
GSBRNA2T00146585001	BnaA07g32920D	GSBRNA2G00146585001	GSBRNA2G00146585001	chrA07:22678175-22678643	UP	PC20	OK	1.81753	136.83	6.23426	5.07058	0.0012	0.0424975	yes
GSBRNA2T00017673001	BnaA08g29220D	GSBRNA2G00017673001	GSBRNA2G00017673001	chrA08_random:69466-72262	UP	PC20	OK	1.6872	127.132	6.23555	6.66256	5e-05	0.00315052	yes
GSBRNA2T00150081001	BnaC03g45950D	GSBRNA2G00150081001	GSBRNA2G00150081001	chrC03:30969615-30972158	UP	PC20	OK	0.569431	42.9522	6.23706	5.68864	5e-05	0.00315052	yes
GSBRNA2T00125192001	BnaC03g35490D	GSBRNA2G00125192001	GSBRNA2G00125192001	chrC03:21548269-21549696	UP	PC20	OK	7.22317	545.017	6.23752	4.21911	0.00035	0.0162035	yes
GSBRNA2T00099084001	BnaA07g19230D	GSBRNA2G00099084001	GSBRNA2G00099084001	chrA07:15473669-15474317	UP	PC20	OK	0.921817	69.5941	6.23834	5.93724	0.00105	0.0384482	yes
GSBRNA2T00003959001	BnaC05g50860D	GSBRNA2G00003959001	GSBRNA2G00003959001	chrC05_random:1684787-1687953	UP	PC20	OK	0.43741	33.1443	6.24363	6.10291	5e-05	0.00315052	yes
GSBRNA2T00148820001	BnaA03g08850D	GSBRNA2G00148820001	GSBRNA2G00148820001	chrA03:4014805-4015543	UP	PC20	OK	5.94111	450.737	6.24541	6.65695	5e-05	0.00315052	yes
GSBRNA2T00091017001	BnaA08g03150D	GSBRNA2G00091017001	GSBRNA2G00091017001	chrA08:2569547-2571009	UP	PC20	OK	1.4236	108.369	6.25027	5.3131	0.0008	0.0311762	yes
GSBRNA2T00078951001	BnaA10g07190D	GSBRNA2G00078951001	GSBRNA2G00078951001	chrA10:5649901-5650722	UP	PC20	OK	1.83476	139.825	6.25189	6.16143	5e-05	0.00315052	yes
GSBRNA2T00045562001	BnaCnng46510D	GSBRNA2G00045562001	GSBRNA2G00045562001	chrCnn_random:45837549-45840230	UP	PC20	OK	0.5031	38.3491	6.2522	5.91231	5e-05	0.00315052	yes
GSBRNA2T00132123001	BnaC06g18960D	GSBRNA2G00132123001	GSBRNA2G00132123001	chrC06:21314284-21317081	UP	PC20	OK	0.563038	43.0522	6.25671	6.5556	5e-05	0.00315052	yes
GSBRNA2T00113633001	BnaA03g39490D	GSBRNA2G00113633001	GSBRNA2G00113633001	chrA03:19704426-19706651	UP	PC20	OK	1.26812	96.9797	6.25693	6.38752	5e-05	0.00315052	yes
GSBRNA2T00097760001	BnaC03g72420D	GSBRNA2G00097760001	GSBRNA2G00097760001	chrC03_random:705618-707609	UP	PC20	OK	9.34121	717.014	6.26225	4.21899	0.0001	0.00574178	yes
GSBRNA2T00070572001	BnaA09g13690D	GSBRNA2G00070572001	GSBRNA2G00070572001	chrA09:7788430-7788670	UP	PC20	OK	83.3589	6405.64	6.26386	6.41426	5e-05	0.00315052	yes
GSBRNA2T00097432001	BnaAnng10550D	GSBRNA2G00097432001	GSBRNA2G00097432001	chrAnn_random:11467979-11469049	UP	PC20	OK	1.66454	127.993	6.2648	6.5312	5e-05	0.00315052	yes
GSBRNA2T00015444001	BnaC03g54030D	GSBRNA2G00015444001	GSBRNA2G00015444001	chrC03:40739586-40742471	UP	PC20	OK	0.424876	32.6984	6.26604	5.12045	0.00035	0.0162035	yes
GSBRNA2T00019044001	BnaC03g22940D	GSBRNA2G00019044001	GSBRNA2G00019044001	chrC03:12717997-12719997	UP	PC20	OK	0.448532	34.5401	6.26692	5.76695	5e-05	0.00315052	yes
GSBRNA2T00032509001	BnaC03g70650D	GSBRNA2G00032509001	GSBRNA2G00032509001	chrC03:60268300-60271136	UP	PC20	OK	1.4785	113.899	6.26748	6.72958	5e-05	0.00315052	yes
GSBRNA2T00153589001	BnaC03g32550D	GSBRNA2G00153589001	GSBRNA2G00153589001	chrC03:19975600-19978003	UP	PC20	OK	3.40968	262.936	6.26893	5.5605	5e-05	0.00315052	yes
GSBRNA2T00095567001	BnaC09g21050D	GSBRNA2G00095567001	GSBRNA2G00095567001	chrC09:18347822-18349647	UP	PC20	OK	0.692229	53.3916	6.26922	6.11507	5e-05	0.00315052	yes
GSBRNA2T00098662001	BnaA07g15740D	GSBRNA2G00098662001	GSBRNA2G00098662001	chrA07:13520757-13522371	UP	PC20	OK	2.17272	167.865	6.27166	6.0276	5e-05	0.00315052	yes
GSBRNA2T00041321001	BnaCnng05770D	GSBRNA2G00041321001	GSBRNA2G00041321001	chrCnn_random:5346171-5348294	UP	PC20	OK	5.63526	438.502	6.28196	4.72815	0.00015	0.00807736	yes
GSBRNA2T00085370001	BnaC05g00650D	GSBRNA2G00085370001	GSBRNA2G00085370001	chrC05:348189-348909	UP	PC20	OK	1.69377	131.837	6.28237	5.89914	5e-05	0.00315052	yes
GSBRNA2T00150525001	BnaA10g00580D	GSBRNA2G00150525001	GSBRNA2G00150525001	chrA10:293367-294087	UP	PC20	OK	1.38962	108.169	6.28246	5.32171	0.00035	0.0162035	yes
GSBRNA2T00092679001	BnaA03g50780D	GSBRNA2G00092679001	GSBRNA2G00092679001	chrA03:26376351-26378241	UP	PC20	OK	0.390907	30.5664	6.28898	4.98375	0.00085	0.0325239	yes
GSBRNA2T00141196001	BnaC04g09250D	GSBRNA2G00141196001	GSBRNA2G00141196001	chrC04:7005379-7007460	UP	PC20	OK	1.06424	83.2348	6.28929	6.05332	0.00015	0.00807736	yes
GSBRNA2T00146548001	BnaA07g33190D	GSBRNA2G00146548001	GSBRNA2G00146548001	chrA07:22830688-22831453	UP	PC20	OK	2.12068	166.34	6.29347	5.68087	5e-05	0.00315052	yes
GSBRNA2T00071611001	BnaC03g34350D	GSBRNA2G00071611001	GSBRNA2G00071611001	chrC03:20837015-20839335	UP	PC20	OK	4.03212	316.789	6.29584	5.79195	5e-05	0.00315052	yes
GSBRNA2T00097598001	BnaC08g48010D	GSBRNA2G00097598001	GSBRNA2G00097598001	chrC08_random:2963712-2964057	UP	PC20	OK	3.07985	242.164	6.29698	7.4965	0.00085	0.0325239	yes
GSBRNA2T00073954001	BnaA01g05340D	GSBRNA2G00073954001	GSBRNA2G00073954001	chrA01:2506614-2509194	UP	PC20	OK	0.407955	32.0796	6.2971	6.24427	5e-05	0.00315052	yes
GSBRNA2T00137699001	BnaA03g32810D	GSBRNA2G00137699001	GSBRNA2G00137699001	chrA03:15839251-15842058	UP	PC20	OK	5.42713	429.056	6.30483	4.77156	0.0002	0.0102143	yes
GSBRNA2T00021941001	BnaC04g48730D	GSBRNA2G00021941001	GSBRNA2G00021941001	chrC04:47239159-47241726	UP	PC20	OK	0.541008	42.8102	6.30616	6.0521	0.00015	0.00807736	yes
GSBRNA2T00030817001	BnaA02g26540D	GSBRNA2G00030817001	GSBRNA2G00030817001	chrA02:19586983-19589684	UP	PC20	OK	1.00297	79.4019	6.30682	6.62106	5e-05	0.00315052	yes
GSBRNA2T00112105001	BnaA03g27350D	GSBRNA2G00112105001	GSBRNA2G00112105001	chrA03:13488872-13489461	UP	PC20	OK	8.70543	689.301	6.30707	6.61012	5e-05	0.00315052	yes
GSBRNA2T00111896001	BnaA03g29100D	GSBRNA2G00111896001	GSBRNA2G00111896001	chrA03:14139727-14142333	UP	PC20	OK	1.41966	112.431	6.30735	6.06953	5e-05	0.00315052	yes
GSBRNA2T00076418001	BnaA01g29830D	GSBRNA2G00076418001	GSBRNA2G00076418001	chrA01:20617654-20620584	UP	PC20	OK	5.74337	455.727	6.31013	4.66781	0.0002	0.0102143	yes
GSBRNA2T00014247001	BnaC07g49180D	GSBRNA2G00014247001	GSBRNA2G00014247001	chrC07_random:1794300-1796090	UP	PC20	OK	4.94113	392.547	6.31188	4.03094	0.00035	0.0162035	yes
GSBRNA2T00068766001	BnaA09g14940D	GSBRNA2G00068766001	GSBRNA2G00068766001	chrA09:8657963-8659223	UP	PC20	OK	0.89484	71.4223	6.3186	6.34932	5e-05	0.00315052	yes
GSBRNA2T00092029001	BnaA08g04750D	GSBRNA2G00092029001	GSBRNA2G00092029001	chrA08:4558016-4559917	UP	PC20	OK	1.28984	103.211	6.32225	6.37023	5e-05	0.00315052	yes
GSBRNA2T00072265001	BnaA02g27790D	GSBRNA2G00072265001	GSBRNA2G00072265001	chrA02:20529416-20530169	UP	PC20	OK	1.55042	124.1	6.3227	5.60171	5e-05	0.00315052	yes
GSBRNA2T00138909001	BnaA03g21590D	GSBRNA2G00138909001	GSBRNA2G00138909001	chrA03:10232719-10234788	UP	PC20	OK	5.62127	450.01	6.32292	4.73094	5e-05	0.00315052	yes
GSBRNA2T00008753001	BnaAnng12200D	GSBRNA2G00008753001	GSBRNA2G00008753001	chrAnn_random:13197917-13200091	UP	PC20	OK	1.02681	82.4855	6.32789	6.54894	5e-05	0.00315052	yes
GSBRNA2T00132279001	BnaC03g18640D	GSBRNA2G00132279001	GSBRNA2G00132279001	chrC03:9542708-9547073	UP	PC20	OK	0.221771	17.8246	6.32866	5.34724	0.00085	0.0325239	yes
GSBRNA2T00125532001	BnaA05g14020D	GSBRNA2G00125532001	GSBRNA2G00125532001	chrA05:8546625-8547706	UP	PC20	OK	1.31982	106.309	6.33178	6.29253	0.0007	0.0284206	yes
GSBRNA2T00059182001	BnaC03g58650D	GSBRNA2G00059182001	GSBRNA2G00059182001	chrC03:47932195-47933972	UP	PC20	OK	1.16843	94.1252	6.33193	6.60728	5e-05	0.00315052	yes
GSBRNA2T00107791001	BnaC01g11000D	GSBRNA2G00107791001	GSBRNA2G00107791001	chrC01:6789782-6790301	UP	PC20	OK	3.64515	294.919	6.3382	6.49716	5e-05	0.00315052	yes
GSBRNA2T00093336001	BnaAnng31850D	GSBRNA2G00093336001	GSBRNA2G00093336001	chrAnn_random:36425122-36427929	UP	PC20	OK	0.805041	65.1978	6.33962	6.0633	5e-05	0.00315052	yes
GSBRNA2T00023808001	BnaC05g39970D	GSBRNA2G00023808001	GSBRNA2G00023808001	chrC05:38307762-38310436	UP	PC20	OK	5.21918	422.792	6.33998	4.70646	0.00015	0.00807736	yes
GSBRNA2T00057413001	BnaA09g47760D	GSBRNA2G00057413001	GSBRNA2G00057413001	chrA09:32145667-32146174	UP	PC20	OK	6.60194	534.824	6.34003	6.11243	5e-05	0.00315052	yes
GSBRNA2T00006585001	BnaC05g14670D	GSBRNA2G00006585001	GSBRNA2G00006585001	chrC05:8656458-8658208	UP	PC20	OK	0.536645	43.6306	6.34523	6.21814	5e-05	0.00315052	yes
GSBRNA2T00123903001	BnaC03g39840D	GSBRNA2G00123903001	GSBRNA2G00123903001	chrC03:24856755-24858851	UP	PC20	OK	2.45917	200.282	6.34772	6.48237	5e-05	0.00315052	yes
GSBRNA2T00079391001	BnaA05g25890D	GSBRNA2G00079391001	GSBRNA2G00079391001	chrA05:19066481-19069161	UP	PC20	OK	4.72945	385.321	6.34825	4.69055	0.0002	0.0102143	yes
GSBRNA2T00120565001	BnaC02g39350D	GSBRNA2G00120565001	GSBRNA2G00120565001	chrC02:42281995-42284945	UP	PC20	OK	0.255897	20.8582	6.3489	5.33903	0.00115	0.0413608	yes
GSBRNA2T00144446001	BnaA06g30420D	GSBRNA2G00144446001	GSBRNA2G00144446001	chrA06:20549606-20551397	UP	PC20	OK	9.42631	772.455	6.35661	4.3146	5e-05	0.00315052	yes
GSBRNA2T00016719001	BnaCnng73190D	GSBRNA2G00016719001	GSBRNA2G00016719001	chrCnn_random:73683813-73684891	UP	PC20	OK	10.514	862.792	6.35863	4.34368	0.0003	0.014397	yes
GSBRNA2T00076300001	BnaC05g48590D	GSBRNA2G00076300001	GSBRNA2G00076300001	chrC05:43015086-43020684	UP	PC20	OK	0.211563	17.3904	6.36106	5.95039	5e-05	0.00315052	yes
GSBRNA2T00137501001	BnaA03g34410D	GSBRNA2G00137501001	GSBRNA2G00137501001	chrA03:16754313-16755968	UP	PC20	OK	2.67819	220.958	6.36637	6.07559	5e-05	0.00315052	yes
GSBRNA2T00134749001	BnaC09g06650D	GSBRNA2G00134749001	GSBRNA2G00134749001	chrC09:4089007-4091216	UP	PC20	OK	0.707336	58.4928	6.36972	5.77848	5e-05	0.00315052	yes
GSBRNA2T00017356001	BnaCnng29100D	GSBRNA2G00017356001	GSBRNA2G00017356001	chrCnn_random:27570085-27572816	UP	PC20	OK	0.324026	26.8581	6.3731	5.95802	0.00015	0.00807736	yes
[truncated: 98 more rows]

## Sheet: UP VS PC30
test_id	Bna_gene_id	gene_id	gene	locus	sample_1	sample_2	status	value_1	value_2	log2(fold_change)	test_stat	p_value	q_value	significant
[truncated: 1,154 more rows]

[truncated: 5 more sheets: UP VS PI2, UP VS PI5, UP VS PI10, UP VS PI20, UP VS PI30]
