# Supplementary material for: Time-Course Transcriptome Analysis of Compatible and Incompatible Pollen-Stigma Interactions in Brassica napus L
Source: Front Plant Sci. 2017 May 3;8:682. doi: 10.3389/fpls.2017.00682 (PMC5413569; doi:10.3389/fpls.2017.00682)
Supplement: Supplementary file 4 [file DataSheet3.XLSX]

## Sheet: UP VS PC
Bna_gene_id	gene_short_name	locus	length	UP_FPKM	PC2_FPKM	PC5_FPKM	PC10_FPKM	PC20_FPKM	PC30_FPKM	PI2_FPKM	PI5_FPKM	PI10_FPKM	PI20_FPKM	PI30_FPKM
BnaA01g01570D	GSBRNA2G00121446001	chrA01:843495-845460	1384	28.3692	31.1455	27.588	37.6397	76.2831	49.1359	29.7169	23.8303	38.966	29.0187	40.8027
BnaA01g01750D	GSBRNA2G00121425001	chrA01:912922-924258	8151	1.21287	7.67843	8.91119	7.15316	10.8368	12.9162	8.71128	8.26331	8.18871	6.87091	16.0792
BnaA01g01830D	GSBRNA2G00121417001	chrA01:941867-942626	759	1.89412	112.217	122.158	124.429	104.712	200.137	91.7707	92.6645	115.321	51.57	154.139
BnaA01g02210D	GSBRNA2G00121378001	chrA01:1135518-1137250	1209	9.24778	11.3695	6.74776	8.48604	1.65993	2.41237	6.24326	8.28606	8.01277	2.46114	0.397941
BnaA01g02230D	GSBRNA2G00121376001	chrA01:1142698-1147072	2878	6.89308	60.7476	51.7418	48.062	85.6753	102.676	46.4712	47.7851	56.1798	32.7764	71.9288
BnaA01g02250D	GSBRNA2G00121373001	chrA01:1153360-1154296	734	47.5441	35.0188	28.3088	25.8425	10.02	16.721	18.8813	38.7987	30.0676	19.3219	0.815229
BnaA01g02430D	GSBRNA2G00121353001	chrA01:1232291-1233049	758	3.51036	6.84216	8.5226	6.43937	10.9691	16.8298	4.75988	4.65115	4.28218	3.21106	3.40125
BnaA01g03090D	GSBRNA2G00121277001	chrA01:1492366-1494367	2001	2.07312	122.52	148.951	105.17	177.772	191.364	133.706	146.481	141.152	100.504	218.143
BnaA01g04520D	GSBRNA2G00121111001	chrA01:2107640-2114667	4066	4.73907	11.4685	12.2792	10.749	12.1311	14.2793	11.0248	11.571	11.9777	8.4901	15.9544
BnaA01g04640D	GSBRNA2G00121096001	chrA01:2162637-2165507	2195	23.7527	18.5357	17.9049	15.7701	7.81742	12.0919	13.5222	16.2226	15.5171	10.7911	3.47914
BnaA01g05060D	GSBRNA2G00121042001	chrA01:2371396-2372853	1000	3.42036	6.56443	5.22609	11.1607	21.1015	22.4665	4.65865	8.09646	21.441	21.0477	16.1028
BnaA01g05340D	GSBRNA2G00073954001	chrA01:2506614-2509194	2580	0.424993	24.5337	30.1448	23.2889	32.0796	37.5968	24.4099	28.453	29.2422	19.1986	49.864
BnaA01g06270D	GSBRNA2G00039950001	chrA01:2902452-2904349	1194	2.71529	9.69824	11.6117	8.9173	15.6828	17.0798	11.1659	10.9436	11.1928	8.79164	15.6108
BnaA01g06610D	GSBRNA2G00039905001	chrA01:3072465-3073755	1290	15.7262	22.7453	23.2196	33.501	38.8314	46.0539	25.4946	34.9611	36.1664	31.7645	28.5445
BnaA01g06730D	GSBRNA2G00039891001	chrA01:3123722-3124923	1006	20.6181	23.3661	28.7164	28.8695	58.0819	49.2221	20.9733	22.9292	23.7399	52.6833	43.2234
BnaA01g06750D	GSBRNA2G00039889001	chrA01:3132438-3133759	1129	14.8849	12.9693	6.05288	12.4664	1.29111	4.27231	11.6215	5.3319	8.01958	4.87517	2.03371
BnaA01g07750D	GSBRNA2G00058175001	chrA01:3676984-3685534	3339	8.48786	15.8454	19.2639	16.7874	23.9199	32.6554	18.1633	19.2289	18.0514	14.8033	23.7085
BnaA01g08120D	GSBRNA2G00058128001	chrA01:3845658-3848204	1293	11.2346	14.6968	13.5757	17.0229	37.5768	19.4096	13.91	12.8761	14.581	19.5126	41.2097
BnaA01g09410D	GSBRNA2G00131351001	chrA01:4607771-4608290	519	4.87138	192.488	169.436	154.039	276.757	285.237	170.74	197.703	195.883	123.231	309.366
BnaA01g09520D	GSBRNA2G00131364001	chrA01:4672711-4674196	1404	17.9092	25.0379	29.5452	26.7871	41.9007	48.6761	28.2044	32.9841	30.78	36.8359	55.7278
BnaA01g09740D	GSBRNA2G00131394001	chrA01:4791577-4794321	1764	20.1281	24.6293	23.5415	27.196	50.1881	80.7063	22.7022	24.1837	41.3584	57.325	63.1502
BnaA01g10780D	GSBRNA2G00131539001	chrA01:5392561-5394801	1749	10.3568	39.4115	35.8398	36.1379	37.8965	38.1141	35.491	42.1775	41.2002	24.1128	45.7804
BnaA01g11770D	GSBRNA2G00131654001	chrA01:5880053-5880575	522	91.5002	58.3633	76.5521	69.1568	45.2217	30.4563	76.1784	83.887	59.2791	82.2874	44.8896
BnaA01g12340D	GSBRNA2G00131733001	chrA01:6165883-6166560	677	30.4892	39.1519	36.7249	44.4735	97.6392	93.529	36.3188	56.8381	49.5019	112.937	81.8156
BnaA01g13110D	GSBRNA2G00079538001	chrA01:6572653-6573367	641	45.3702	40.978	22.7694	19.0445	7.49518	13.7538	14.7081	32.4353	35.1998	6.1697	0.683539
BnaA01g13950D	GSBRNA2G00056325001	chrA01:7087664-7088722	1058	0.712194	4.71484	3.71284	9.48772	9.36824	10.0572	3.66917	7.77928	12.7715	8.77068	4.32942
BnaA01g14010D	GSBRNA2G00056333001	chrA01:7116843-7118074	859	15.2865	657.398	645.604	518.735	943.878	1137.26	546.368	686.24	677.247	379.271	933.639
BnaA01g14450D	GSBRNA2G00056381001	chrA01:7296381-7299947	1342	62.1086	85.9927	48.3881	47.5057	9.2264	26.2171	36.5982	89.4115	34.5457	7.21236	26.4257
BnaA01g14490D	GSBRNA2G00056385001	chrA01:7306476-7308003	1251	2.23931	10.3077	13.9828	11.2728	13.221	17.5202	11.2522	15.0287	15.508	8.17648	19.8142
BnaA01g15000D	GSBRNA2G00149628001	chrA01:7620768-7622405	1016	50.9971	67.3898	78.6675	97.939	183.614	243.72	43.9056	67.9683	100.474	189.302	230.72
BnaA01g15090D	GSBRNA2G00149616001	chrA01:7692787-7696164	1156	1.24926	38.5824	58.1133	31.223	72.9443	110.217	43.787	48.6135	47.2456	25.3928	64.5636
BnaA01g16370D	GSBRNA2G00149459001	chrA01:8442364-8444225	1102	14.159	33.1732	35.8593	28.8477	46.2102	57.1535	32.8647	35.623	35.3956	27.2397	55.7746
BnaA01g16670D	GSBRNA2G00149415001	chrA01:8692976-8694694	1351	0.86352	31.2958	33.4313	29.2037	47.8202	57.6277	30.6766	31.0524	36.6469	23.8244	64.6306
BnaA01g19850D	GSBRNA2G00138420001	chrA01:11464957-11467265	1386	1.0949	23.3503	26.7409	20.4829	35.8911	42.5238	21.0008	25.9859	28.0425	17.3925	44.2129
BnaA01g19870D	GSBRNA2G00138423001	chrA01:11512471-11514458	1987	6.54379	11.9085	10.3691	16.247	15.5646	18.4264	11.6953	12.5918	20.878	18.9588	12.7933
BnaA01g19880D	GSBRNA2G00138427001	chrA01:11570348-11572195	1214	14.6341	16.3662	15.2619	15.2398	21.1346	33.7829	17.798	16.2698	21.1459	14.7361	23.0078
BnaA01g21610D	GSBRNA2G00024213001	chrA01:13888425-13889250	825	0.793046	45.123	54.2959	38.0183	76.5782	97.8155	47.522	46.8501	53.6221	38.3244	89.7734
BnaA01g22700D	GSBRNA2G00087683001	chrA01:15012168-15012396	228	21.6446	1230.71	834.272	950.335	1338.75	1339.69	884.721	1139.21	945.794	629.896	1636.36
BnaA01g22900D	GSBRNA2G00086855001	chrA01:15244579-15246305	1383	0.703469	35.0294	32.5245	31.2524	38.2746	43.3412	28.3804	32.7357	32.8282	21.8267	57.779
BnaA01g24530D	GSBRNA2G00056248001	chrA01:16949332-16951348	1463	9.24862	16.267	18.2219	17.0046	16.5241	22.82	16.2071	17.908	17.589	11.9126	15.7297
BnaA01g25310D	GSBRNA2G00063834001	chrA01:17711929-17718009	3478	0.204037	3.02812	3.88251	2.39523	4.13673	6.56302	3.89708	3.02218	3.19201	2.37177	5.27329
BnaA01g26320D	GSBRNA2G00005599001	chrA01:18388708-18391231	1917	0.598163	34.3776	41.6682	27.8105	55.0993	61.182	40.2788	40.2883	36.3073	27.4926	50.9582
BnaA01g26480D	GSBRNA2G00005576001	chrA01:18549643-18553027	2254	0.795449	38.887	43.2479	33.2552	68.5278	79.0369	38.4291	39.4485	42.5478	37.059	92.7908
BnaA01g28690D	GSBRNA2G00009992001	chrA01:19946504-19948041	1409	2.28096	5.01897	4.77544	9.73895	9.07129	9.16833	4.4862	9.57745	10.862	10.5708	3.48825
BnaA01g29290D	GSBRNA2G00009921001	chrA01:20229660-20232769	2145	0.673592	1.50376	1.02745	1.78327	4.05438	7.38941	1.32872	1.38978	2.90583	4.65975	6.6452
BnaA01g29830D	GSBRNA2G00076418001	chrA01:20617654-20620584	1812	5.98168	331.604	320.777	280.968	455.727	468.36	281.064	327.281	366.764	227.626	552.551
BnaA01g30380D	GSBRNA2G00096968001	chrA01:20865811-20868034	1719	0.555458	3.34427	3.44024	3.23455	6.48905	6.87194	4.09031	3.95019	4.31709	3.0958	7.00266
BnaA01g30830D	GSBRNA2G00097000001	chrA01:21042513-21043895	1224	1.6485	2.37057	9.0742	4.11692	8.30885	1.89451	6.04468	2.01209	3.67217	4.17457	7.30991
BnaA01g32580D	GSBRNA2G00057504001	chrA01:21980100-21982473	1818	0.285304	11.0426	14.8877	12.1274	10.8761	17.052	10.1532	15.0008	24.2631	6.50158	17.1643
BnaA01g32760D	GSBRNA2G00057526001	chrA01:22129827-22133863	1715	9.65787	10.0092	8.80876	9.39788	2.55837	5.46877	10.1532	10.1349	8.67453	4.89123	2.1339
BnaA01g34170D	GSBRNA2G00015387001	chrA01:23073470-23074406	936	2.0571	1.60561	1.31321	12.9559	9.52696	10.6659	4.96141	9.39255	2.34928	7.20478	15.0722
BnaA01g35060D	GSBRNA2G00053446001	chrA01_random:363569-366449	1272	13.6512	14.6629	10.0761	11.5737	3.99232	7.01845	9.92968	9.23159	15.2607	5.04318	1.15193
BnaA01g35070D	GSBRNA2G00055555001	chrA01_random:381248-385878	1698	23.8444	25.644	19.3297	16.7519	8.23499	11.1623	12.0317	20.4743	19.4352	6.66811	2.16367
BnaA01g36400D	GSBRNA2G00017053001	chrA01_random:1960991-1965651	2830	0.597549	22.2572	22.9419	18.8564	36.1783	40.0005	22.4108	22.7967	25.8311	19.959	45.1601
BnaA02g00670D	GSBRNA2G00143498001	chrA02:252492-254660	1633	13.6077	11.1338	8.06801	8.56956	5.99272	3.95414	13.8451	10.8645	5.33076	11.4651	6.09838
BnaA02g01510D	GSBRNA2G00143397001	chrA02:693413-695117	1154	23.253	28.2397	23.9376	33.4797	59.7904	56.2391	23.6695	29.0459	36.8086	52.5991	90.0879
BnaA02g02970D	GSBRNA2G00143224001	chrA02:1313417-1315459	1557	0.78056	33.7344	50.5436	49.31	33.2953	61.5888	46.0292	41.6393	52.6672	30.7512	129.848
BnaA02g04170D	GSBRNA2G00081068001	chrA02:1865798-1868113	1803	1.03045	42.659	42.1957	38.0972	63.9954	78.6236	39.4384	40.7705	43.5845	34.9546	81.6454
BnaA02g04760D	GSBRNA2G00081382001	chrA02:2113033-2114146	756	3.37921	164.516	169.959	137.681	208.247	255.355	137.766	166.981	169.049	98.6657	261.03
BnaA02g05410D	GSBRNA2G00001337001	chrA02:2480806-2483472	1604	3.31788	31.4346	35.4006	30.8637	45.0482	50.0555	31.3201	34.7275	40.0157	26.7926	54.3829
BnaA02g05510D	GSBRNA2G00001353001	chrA02:2543593-2544830	1237	2.49288	6.08733	4.63742	8.95642	7.86463	13.0708	4.26428	10.1887	14.5791	8.59545	4.92213
BnaA02g06790D	GSBRNA2G00048022001	chrA02:3233536-3234019	483	3.54142	10.0256	6.23651	18.7271	46.313	29.3879	7.56042	13.9089	13.1148	31.5958	32.3929
BnaA02g06880D	GSBRNA2G00029761001	chrA02:3265338-3267293	1751	2.54259	3.96998	3.04292	4.91651	8.45599	6.39303	3.08222	2.95904	4.46566	8.97248	8.83609
BnaA02g07040D	GSBRNA2G00010708001	chrA02:3343064-3344753	1066	48.7249	42.86	52.8036	56.9895	109.091	129.295	47.8513	78.2346	55.4809	145.81	130.464
BnaA02g07080D	GSBRNA2G00010703001	chrA02:3356024-3358401	1370	0.507716	21.6496	22.8009	20.0555	29.8422	36.3548	17.4786	22.0889	21.7371	14.6182	33.5524
BnaA02g07120D	GSBRNA2G00052690001	chrA02:3392424-3393327	767	18.4356	26.1013	29.1103	30.1829	56.8549	21.1389	30.3293	50.5012	16.7581	40.9511	86.7574
BnaA02g07920D	GSBRNA2G00052781001	chrA02:3750092-3753377	2577	1.60132	69.1393	78.6001	60.3969	98.7731	103.317	70.3702	75.8373	80.052	51.9262	128.686
BnaA02g08480D	GSBRNA2G00012909001	chrA02:4133018-4137651	2463	1.97906	91.6805	93.3784	80.5915	116.416	141.492	86.0837	97.9643	103.653	70.2653	171.016
BnaA02g09590D	GSBRNA2G00041412001	chrA02:4811612-4812202	590	10.7154	28.6027	22.8666	42.0989	41.383	42.2297	26.9332	44.2063	59.5917	36.2845	31.9768
BnaA02g09800D	GSBRNA2G00041437001	chrA02:4908408-4910182	1091	0.516516	29.4664	30.0536	25.7923	35.4413	42.9621	28.647	35.2252	35.6093	17.403	47.7898
BnaA02g09870D	GSBRNA2G00041446001	chrA02:4950702-4954201	1800	0.836376	19.9387	19.2281	18.122	25.5054	29.4128	18.8958	20.7466	22.2893	12.5596	33.6226
BnaA02g10360D	GSBRNA2G00092525001	chrA02:5301232-5301844	520	2.98178	34.5711	37.9577	24.3254	95.646	93.5655	43.7372	31.2492	31.9034	27.8391	74.0562
BnaA02g10950D	GSBRNA2G00036893001	chrA02:5686964-5692238	1551	20.5877	35.8488	41.9257	41.2564	98.5006	55.0538	37.9503	32.1748	22.3101	31.5603	39.615
BnaA02g11430D	GSBRNA2G00090867001	chrA02:5995398-5998478	2286	0.936257	2.27395	4.79868	3.33213	5.64579	0.703545	1.50567	1.74674	4.11089	2.14401	2.72462
BnaA02g11790D	GSBRNA2G00090908001	chrA02:6182711-6184239	1250	0.904171	17.2751	19.8237	15.825	18.6296	21.4297	15.4116	20.1766	21.1768	10.0003	20.1952
BnaA02g13590D	GSBRNA2G00070219001	chrA02:7458165-7459260	1095	0.812882	36.1861	36.5006	31.8316	52.6844	49.4395	30.1815	37.3869	42.5258	23.5589	64.8032
BnaA02g13820D	GSBRNA2G00081054001	chrA02:7602844-7605611	1837	2.74342	4.09009	4.08564	6.1024	9.7378	10.8265	3.68239	5.08966	7.11322	9.09857	9.42743
BnaA02g15820D	GSBRNA2G00116439001	chrA02:9256426-9258660	2002	12.9762	11.1911	11.5058	10.2168	4.47223	10.6948	10.9224	7.83915	16.8921	5.89878	6.06517
BnaA02g15980D	GSBRNA2G00116415001	chrA02:9432988-9433684	696	31.5615	22.5588	14.6836	14.5236	7.57003	11.2157	13.7206	19.2938	15.4242	10.0561	0.915537
BnaA02g16020D	GSBRNA2G00093927001	chrA02:9485260-9489018	2879	0.234235	0.993968	0.481209	1.51477	2.08436	2.21827	0.343837	0.878065	4.57526	1.78772	0.659316
BnaA02g16460D	GSBRNA2G00023444001	chrA02:9798811-9799775	863	23.3268	55.6297	59.8326	105.551	160.532	195.849	49.9948	94.3239	112.89	137.598	139.724
BnaA02g16670D	GSBRNA2G00088001001	chrA02:9958064-9959863	1142	0.970182	21.2492	25.4305	14.4094	51.1862	65.482	24.4752	26.3272	20.7954	18.3256	40.7859
BnaA02g18700D	GSBRNA2G00036507001	chrA02:11452378-11453377	921	16.4404	13.2086	10.0671	9.08061	4.76498	6.10753	3.29495	11.0256	10.5814	4.49258	0.260643
BnaA02g18750D	GSBRNA2G00036515001	chrA02:11537700-11538705	966	13.0426	10.3032	11.0195	7.57043	3.4691	5.50552	12.528	13.668	13.4832	4.04754	4.20252
BnaA02g20030D	GSBRNA2G00064194001	chrA02:12363859-12365066	1028	10.878	21.5024	15.9599	24.1559	38.108	46.0992	16.5808	19.4762	25.9611	18.4548	9.89157
BnaA02g20040D	GSBRNA2G00064191001	chrA02:12388292-12389871	1093	9.99253	11.0458	10.593	14.1646	20.4075	26.5448	10.2187	12.2496	15.7258	15.3551	17.2986
BnaA02g20700D	GSBRNA2G00104319001	chrA02:13047934-13050542	1487	8.99772	10.9064	9.73916	10.0253	21.0541	31.0338	7.70381	6.98644	15.158	21.312	42.5971
BnaA02g20850D	GSBRNA2G00104341001	chrA02:13170645-13171343	582	27.0048	21.3816	16.4898	15.6253	3.83609	5.60849	10.9318	21.7664	15.0922	7.00949	2.22314
BnaA02g22470D	GSBRNA2G00084824001	chrA02:15006338-15008337	995	32.8934	21.0109	18.4489	20.4359	9.67386	22.7293	26.6786	22.181	21.2816	22.298	6.82312
BnaA02g23460D	GSBRNA2G00072498001	chrA02:16676771-16681351	3447	2.44276	1.8412	1.6276	1.18541	0.537752	0.64585	1.21522	1.36308	1.20484	0.671408	0.331131
BnaA02g23670D	GSBRNA2G00035184001	chrA02:16941237-16944515	2483	5.92459	3.18479	2.64615	4.32156	1.89118	0.959546	1.23134	2.20981	3.13426	2.88927	1.42267
BnaA02g26300D	GSBRNA2G00030855001	chrA02:19402479-19406384	1157	1.09075	5.12866	5.51063	12.4205	41.2492	72.9778	5.8687	14.7446	24.1157	48.8941	83.1591
BnaA02g26540D	GSBRNA2G00030817001	chrA02:19586983-19589684	1579	1.04497	50.8897	52.1366	44.9171	79.4019	90.9461	51.7497	53.8063	59.3276	48.1505	110.996
BnaA02g26600D	GSBRNA2G00030810001	chrA02:19635748-19639697	2053	5.4309	8.30389	9.44156	8.1419	12.6779	15.3987	9.40687	9.8203	8.9799	10.2014	15.5765
BnaA02g27010D	GSBRNA2G00069585001	chrA02:19945984-19947295	1311	4.21626	15.3162	14.2786	11.6079	19.7664	22.011	14.9984	15.0033	15.1063	12.5696	19.3953
BnaA02g27380D	GSBRNA2G00093597001	chrA02:20184060-20186383	1347	1.4069	112.887	95.2715	102.235	141.292	142.98	89.2216	106.077	121.177	74.3347	174.095
BnaA02g27790D	GSBRNA2G00072265001	chrA02:20529416-20530169	753	1.61519	61.3235	73.6684	41.0647	124.1	166.251	58.5021	88.8662	69.8249	54.1515	121.227
BnaA02g27890D	GSBRNA2G00072281001	chrA02:20589788-20591472	1616	35.9889	26.3436	23.3165	22.0559	14.4187	12.1412	21.1336	19.5817	19.154	14.2329	10.1211
BnaA02g27990D	GSBRNA2G00072298001	chrA02:20677824-20680307	1308	5.31221	17.7613	18.2116	15.6178	19.0345	24.204	17.9852	18.8263	20.6641	13.9356	25.226
BnaA02g28200D	GSBRNA2G00092174001	chrA02:20787777-20788559	613	50.7677	67.9316	44.5325	38.107	13.3525	14.3008	61.0705	64.1882	48.6688	12.6084	10.3313
BnaA02g28700D	GSBRNA2G00056151001	chrA02:21085844-21087849	977	3.43128	10.4137	7.99699	13.8039	28.7542	52.6916	8.3645	12.3968	28.2307	32.811	50.5181
BnaA02g28980D	GSBRNA2G00093777001	chrA02:21247052-21248778	871	41.9	44.7906	30.9348	27.7212	14.1303	24.6086	22.911	33.5959	31.8538	19.0614	4.77136
BnaA02g30040D	GSBRNA2G00091645001	chrA02:21813454-21815860	1513	12.6898	18.9227	12.9093	17.2737	23.8968	34.9365	20.4624	14.7428	20.1654	9.93913	13.6039
BnaA02g30100D	GSBRNA2G00091655001	chrA02:21851127-21853921	2311	5.82402	11.0828	6.92987	10.3209	13.4392	14.413	7.26951	7.45152	11.6843	12.9105	4.73103
BnaA02g30210D	GSBRNA2G00091667001	chrA02:21892059-21892443	384	55.1774	67.1266	69.1541	82.0138	145.799	48.9608	63.4786	70.1853	65.4282	74.8917	73.6031
BnaA02g30620D	GSBRNA2G00055435001	chrA02:22119789-22122345	1975	4.86519	240.763	266.685	225.782	334.591	399.12	222.897	243.655	264.035	197.422	482.41
BnaA02g30740D	GSBRNA2G00055421001	chrA02:22180980-22185890	2799	8.70941	4.34858	5.56143	6.72804	2.24274	3.28961	8.74123	5.35432	6.44448	5.60311	3.53638
BnaA02g31020D	GSBRNA2G00055386001	chrA02:22407993-22410773	2526	0.265945	14.2411	16.4873	12.1218	18.8589	23.5972	14.1664	15.4954	16.0344	11.0649	25.9899
BnaA02g31900D	GSBRNA2G00120429001	chrA02:23001727-23004056	1361	20.2169	28.7241	22.0636	31.9279	59.2051	30.2941	37.4926	29.0378	27.7375	44.5262	89.5762
BnaA02g31930D	GSBRNA2G00120425001	chrA02:23012533-23014309	1389	2.39893	8.25885	10.9772	8.46164	9.54051	12.8506	8.88714	11.548	11.7603	7.42365	12.8695
BnaA02g34030D	GSBRNA2G00047523001	chrA02:24329963-24330853	696	23.8845	25.9562	21.8295	19.4583	8.17958	6.25075	19.4449	27.99	21.7222	9.79149	11.312
BnaA02g34090D	GSBRNA2G00047514001	chrA02:24375655-24377349	1321	25.0925	23.5571	27.6469	28.5108	46.9162	66.5827	24.3478	31.2062	35.8325	55.701	61.9856
BnaA02g34120D	GSBRNA2G00047508001	chrA02:24398484-24399399	915	7.71885	8.94071	6.86247	9.49204	13.7961	23.5794	6.10367	7.73732	15.8066	21.0054	23.0064
BnaA02g34140D	GSBRNA2G00047504001	chrA02:24419465-24419985	520	14.5244	29.7198	32.6354	45.192	84.1831	84.2725	20.3141	30.2988	43.6027	77.4648	46.4825
BnaA02g34510D	GSBRNA2G00047455001	chrA02:24582144-24586321	941	9.31518	8.96411	7.62047	8.21331	0.78573	0.828941	6.21782	7.25383	8.53983	0.638953	0.794304
BnaA02g35410D	GSBRNA2G00043969001	chrA02_random:252434-255509	2262	5.31868	65.6467	68.0636	57.6803	80.5163	92.0361	65.549	74.0564	76.0576	48.8922	102.756
BnaA02g35880D	GSBRNA2G00042766001	chrA02_random:590037-593386	1953	9.35238	34.9906	36.0274	34.4554	38.7098	42.4666	32.3333	37.3456	40.8363	25.4505	47.3302
BnaA02g36030D	GSBRNA2G00066084001	chrA02_random:666513-667522	869	34.3177	60.4603	33.5927	68.2701	173.465	99.0562	27.4298	44.0317	90.7722	89.4525	148.927
BnaA02g36510D	GSBRNA2G00016772001	chrA02_random:996219-997101	789	3.44923	241.912	238.732	231.971	275.862	299.591	201.901	256.323	280.709	144.18	361.173
BnaA02g37020D	GSBRNA2G00027985001	chrA02_random:1541701-1547395	1692	20.301	24.3817	15.9867	14.9916	7.58404	10.5905	12.6114	17.5003	16.5526	9.89436	1.7449
BnaA03g00190D	GSBRNA2G00049200001	chrA03:78230-79886	1629	28.098	35.4598	34.983	39.2405	62.2449	86.2008	36.6312	39.8447	46.7255	63.321	87.3545
BnaA03g00800D	GSBRNA2G00049267001	chrA03:345043-345860	817	28.0809	21.4708	21.5762	16.8332	7.82356	7.13898	19.843	21.0794	16.7199	12.3059	6.50083
BnaA03g00870D	GSBRNA2G00049277001	chrA03:378519-380641	1494	14.0259	17.7508	10.6069	10.2806	3.92377	2.80674	4.84999	10.3765	11.4633	2.96732	2.51941
BnaA03g01040D	GSBRNA2G00049299001	chrA03:452883-457717	2270	5.66391	9.83962	10.8806	10.8717	22.9634	21.8638	15.7413	11.5718	13.2501	13.7844	25.3697
BnaA03g01070D	GSBRNA2G00049303001	chrA03:472765-475042	1104	107.619	74.3963	73.5785	37.8062	12.0227	20.4524	23.7283	64.9391	70.0003	8.98513	2.15466
BnaA03g01150D	GSBRNA2G00049312001	chrA03:549617-552620	2280	2.86361	8.03495	9.58079	7.64859	13.4736	14.7508	8.27939	8.24183	8.63482	7.94932	14.746
BnaA03g02030D	GSBRNA2G00129640001	chrA03:939751-941250	1033	2.20051	133.748	103.342	98.1554	221.993	264.86	121.218	142.888	141.511	123.713	281.697
BnaA03g02500D	GSBRNA2G00129695001	chrA03:1129248-1130013	765	26.9334	13.1163	12.6477	13.2623	2.87043	2.22808	8.50242	11.6964	14.8941	5.11023	0.923546
BnaA03g02510D	GSBRNA2G00129696001	chrA03:1131319-1133741	1224	24.6609	25.7883	19.2902	23.5121	7.77252	7.4151	18.3003	22.7534	26.3466	9.73058	16.4696
BnaA03g04590D	GSBRNA2G00129952001	chrA03:2138890-2140466	1309	10.2452	14.9663	16.1707	16.2695	37.881	13.1026	6.85512	5.79081	8.14832	10.3768	20.0583
BnaA03g05190D	GSBRNA2G00130020001	chrA03:2389310-2391491	1749	0.702202	12.8863	26.1493	10.0206	32.7439	56.0131	15.2128	18.3211	17.0152	7.96025	24.0267
BnaA03g05250D	GSBRNA2G00130027001	chrA03:2421017-2422758	1103	1.00093	9.69022	23.8449	6.4251	30.9334	53.3949	11.213	11.1968	8.60675	7.0977	19.0954
BnaA03g05430D	GSBRNA2G00130048001	chrA03:2480623-2483968	2361	0.934546	3.18022	4.60103	3.38022	4.01988	5.1107	3.50261	3.92633	4.90845	2.47916	7.05587
BnaA03g07740D	GSBRNA2G00148964001	chrA03:3437115-3439760	1679	20.6812	58.7902	59.6019	52.0949	82.242	93.7651	55.8674	62.1841	60.8456	52.5748	93.1867
BnaA03g08110D	GSBRNA2G00148916001	chrA03:3651670-3655237	2481	6.60102	6.83331	5.11664	3.99943	1.5527	1.67478	5.26145	4.89698	5.21013	1.77651	1.08381
BnaA03g08850D	GSBRNA2G00148820001	chrA03:4014805-4015543	595	6.18734	475.955	417.316	361.337	450.737	472.574	334.233	456.093	493.071	207.528	516.986
BnaA03g09170D	GSBRNA2G00148784001	chrA03:4129191-4129924	733	27.536	30.1353	35.0888	41.3184	70.1091	24.3285	27.1165	36.2829	38.674	32.2144	41.7391
BnaA03g09530D	GSBRNA2G00148744001	chrA03:4270443-4271227	634	16.6212	18.1319	26.2964	20.7868	65.8367	18.0502	51.4748	74.1568	14.2828	54.9107	69.3364
BnaA03g10420D	GSBRNA2G00148642001	chrA03:4688135-4690485	1778	2.14684	4.87783	4.53775	8.41505	13.8973	22.7913	5.35312	7.26327	13.3405	15.9247	16.5323
BnaA03g10620D	GSBRNA2G00148620001	chrA03:4795742-4799004	1591	4.10141	45.302	45.8483	37.5249	49.8826	61.4904	38.1346	48.2317	49.6921	30.4069	68.4519
BnaA03g10920D	GSBRNA2G00062627001	chrA03:4899927-4906150	2503	1.41719	4.27667	4.39711	3.87877	4.30169	4.60709	4.36038	4.36854	3.60737	2.39094	4.00612
BnaA03g11060D	GSBRNA2G00062612001	chrA03:4969164-4972492	1909	0.41377	6.80678	5.90652	6.36341	11.2199	10.6131	6.00941	6.28031	8.09862	4.18506	8.69275
BnaA03g11700D	GSBRNA2G00075848001	chrA03:5260774-5264151	1836	3.95123	18.706	20.3639	17.592	21.0917	26.106	19.3623	20.2759	22.8776	12.6955	27.9889
BnaA03g13650D	GSBRNA2G00142184001	chrA03:6248340-6249325	858	0.912567	4.46447	5.23941	12.618	16.2028	20.6018	4.18747	11.3214	17.6737	10.4114	6.15134
BnaA03g13740D	GSBRNA2G00142173001	chrA03:6307491-6309741	1071	5.64656	8.34167	5.07617	9.77791	19.9082	14.7026	5.24871	5.93716	14.0426	13.3343	10.7158
BnaA03g14030D	GSBRNA2G00142139001	chrA03:6429844-6432695	1891	76.5374	69.8398	59.0243	50.427	13.947	21.7564	43.8489	70.3582	61.2534	20.3687	3.43014
BnaA03g14480D	GSBRNA2G00142075001	chrA03:6666240-6669454	2053	0.541837	33.8084	35.2418	29.6394	45.3329	54.2695	31.8677	35.0011	38.4321	26.5181	57.7176
BnaA03g15380D	GSBRNA2G00141972001	chrA03:7139281-7141488	1723	0.905961	1.5395	1.80067	3.08391	5.01628	8.58773	1.77634	2.96786	6.26615	4.77998	3.37251
BnaA03g15420D	GSBRNA2G00141968001	chrA03:7152518-7157108	2985	0.180728	10.9557	14.9384	10.2374	15.0548	19.5595	12.6226	12.9958	14.1334	9.34838	21.4236
BnaA03g15750D	GSBRNA2G00141931001	chrA03:7290040-7295561	3495	0.632293	1.15317	1.0273	1.09977	3.15016	6.89947	1.10709	1.178	1.7428	3.04772	3.57019
BnaA03g16020D	GSBRNA2G00141899001	chrA03:7407851-7409946	983	10.0616	45.3434	42.678	39.6562	49.1577	57.7803	40.0241	47.8066	54.2364	29.5656	59.7132
BnaA03g16500D	GSBRNA2G00141837001	chrA03:7712441-7714700	1112	0.502516	30.0295	31.1036	25.1199	35.6885	47.2179	23.8405	28.5219	29.1162	17.8991	54.5492
BnaA03g16770D	GSBRNA2G00141803001	chrA03:7845989-7848249	2117	1.92509	2.63649	4.21734	4.12311	6.72551	1.61308	5.59833	2.18513	6.16008	4.11296	8.25872
BnaA03g17030D	GSBRNA2G00086084001	chrA03:7987202-7988660	1151	9.41004	22.4029	5.58677	7.99	33.3364	21.3044	3.1491	6.19218	14.5608	23.7847	33.7272
BnaA03g19250D	GSBRNA2G00058434001	chrA03:9095209-9097196	1900	0.558408	26.3852	31.3834	24.8161	37.6486	46.4469	28.7468	29.1708	28.3494	19.9261	48.4403
BnaA03g19290D	GSBRNA2G00058430001	chrA03:9109164-9111517	1334	17.1654	7.27807	10.722	5.53382	2.07017	1.23777	4.83908	9.18889	6.00225	5.11219	0.48504
BnaA03g19650D	GSBRNA2G00058379001	chrA03:9316135-9316572	437	17.6467	908.518	726.58	647.598	1011.05	1131.95	638.045	831.37	825.672	496.393	1138.19
BnaA03g21310D	GSBRNA2G00138941001	chrA03:10118687-10120831	1786	10.8767	22.1018	24.9287	20.5707	27.9443	35.6935	23.7183	24.4906	26.8696	21.9966	37.4652
BnaA03g21460D	GSBRNA2G00138923001	chrA03:10173562-10175159	945	2.4674	3.78094	3.40473	5.26588	6.21023	10.2696	3.78492	4.17689	5.43227	7.88776	6.53251
BnaA03g21590D	GSBRNA2G00138909001	chrA03:10232719-10234788	1783	5.85652	275.202	268.519	249.823	450.01	502.811	248.361	295.742	330.21	244.334	560.944
BnaA03g21600D	GSBRNA2G00138908001	chrA03:10239150-10239801	651	3.05101	212.74	204.534	190.719	266.268	262.753	184.657	226.95	249.033	141.319	343.908
BnaA03g22500D	GSBRNA2G00138807001	chrA03:10681807-10684654	815	0.956443	33.8674	33.9317	30.8778	53.3801	68.9818	37.2495	38.1707	36.3546	27.8733	71.3786
BnaA03g22710D	GSBRNA2G00138784001	chrA03:10799440-10801830	1901	1.27425	71.7643	71.5612	63.2258	104.635	126.384	67.1223	73.6666	79.1607	50.8423	126.69
BnaA03g23010D	GSBRNA2G00138746001	chrA03:10973596-10975155	1255	7.28742	14.8723	10.7936	23.6611	41.7052	38.8585	12.122	21.8629	23.736	40.6318	43.4195
BnaA03g23290D	GSBRNA2G00138707001	chrA03:11135067-11136172	1031	0.930858	21.3511	24.0874	18.2098	27.7755	31.9256	21.7971	24.0018	28.4178	15.6805	35.4737
BnaA03g23580D	GSBRNA2G00138676001	chrA03:11271408-11273915	2280	0.972957	13.6272	18.899	14.1347	22.7404	24.3287	15.5533	17.2129	18.1815	11.6228	24.2525
BnaA03g25630D	GSBRNA2G00151606001	chrA03:12452672-12453915	1078	7.15562	11.1971	13.8422	16.6401	22.997	23.3772	8.13169	13.2542	19.4138	20.3111	18.0596
BnaA03g26600D	GSBRNA2G00112208001	chrA03:13046696-13047077	381	7.11519	25.4598	25.081	22.512	51.4276	52.1853	27.8641	27.9322	22.2636	19.5616	38.4359
BnaA03g27350D	GSBRNA2G00112105001	chrA03:13488872-13489461	384	9.06791	394.913	341.321	292.651	689.301	647.349	523.311	563.234	589.195	385.039	842.371
BnaA03g27540D	GSBRNA2G00112086001	chrA03:13552850-13555231	1828	2.82849	127.869	142.653	116.609	171.688	203.892	131.654	143.57	174.628	121.77	312.905
BnaA03g27560D	GSBRNA2G00112084001	chrA03:13562108-13562743	635	4.36246	273.489	251.953	246.512	257.148	305.819	181.514	221.563	268.542	146.286	419.763
BnaA03g27650D	GSBRNA2G00112072001	chrA03:13589757-13592422	2151	0.312598	18.1483	19.8301	15.7176	26.0346	31.8829	19.9896	19.8841	20.301	13.9043	37.5614
BnaA03g28130D	GSBRNA2G00112015001	chrA03:13748463-13750949	1970	0.259922	26.9066	29.9286	25.3447	33.3362	37.9457	25.5282	28.4627	32.403	16.7955	45.8027
BnaA03g28540D	GSBRNA2G00111959001	chrA03:13926979-13928170	1164	0.442162	17.4737	13.2172	11.7083	32.1856	36.9233	13.301	16.1132	7.8003	6.84882	15.1167
BnaA03g28700D	GSBRNA2G00111939001	chrA03:13988824-13990887	1277	1.24845	8.95006	11.1779	10.6318	10.7791	10.2969	9.60054	10.8235	12.3693	7.88277	17.6998
BnaA03g28740D	GSBRNA2G00111935001	chrA03:14000826-14002404	1080	2.78345	211.671	217.24	213.28	246.663	268.224	174.69	209.316	241.63	125.608	303.703
BnaA03g29100D	GSBRNA2G00111896001	chrA03:14139727-14142333	2340	1.47903	75.9673	79.9738	65.7851	112.431	123.857	81.3427	96.0334	94.6778	76.3572	191.798
BnaA03g29240D	GSBRNA2G00111879001	chrA03:14224591-14225789	934	1.25822	24.6204	45.6931	22.4932	62.6999	80.7658	34.8897	39.575	24.6727	22.6553	58.9625
BnaA03g30180D	GSBRNA2G00111771001	chrA03:14640282-14642602	2124	2.24845	66.212	101.088	75.6492	75.6708	85.2509	144.929	152.245	147.785	195.951	459.047
BnaA03g31930D	GSBRNA2G00111559001	chrA03:15420095-15421395	855	1.0275	78.7106	69.2019	73.4608	86.5021	94.5673	57.8583	80.7185	88.2508	39.8073	110.491
BnaA03g32800D	GSBRNA2G00137700001	chrA03:15835061-15837447	2060	0.92004	21.38	28.6374	16.4332	48.9276	60.6587	23.171	25.4069	21.8188	15.9096	36.7963
BnaA03g32810D	GSBRNA2G00137699001	chrA03:15839251-15842058	1932	5.65339	292.02	261.32	234.907	429.056	448.48	237.997	286.727	306.537	211.904	537.251
BnaA03g33790D	GSBRNA2G00137580001	chrA03:16358257-16359218	940	13.7347	30.5734	27.5927	53.7847	74.6854	59.3355	20.3659	46.3702	58.3277	59.6689	35.3632
BnaA03g34410D	GSBRNA2G00137501001	chrA03:16754313-16755968	1265	2.78983	173.818	148.462	153.833	220.958	235.075	130.333	159.228	177.431	122.427	290.987
BnaA03g34960D	GSBRNA2G00137442001	chrA03:17053224-17056487	2289	0.53136	26.9146	28.1771	23.3938	35.7246	41.8049	26.2317	28.5437	28.3843	20.2258	49.0795
BnaA03g35520D	GSBRNA2G00137371001	chrA03:17345517-17348242	1809	4.99874	22.5679	24.6116	23.2032	38.9489	43.6494	24.7532	25.9195	30.5269	29.115	47.5363
BnaA03g35630D	GSBRNA2G00137360001	chrA03:17398863-17401047	2046	1.25531	19.5759	22.8174	16.8132	27.5146	31.1851	20.9941	20.2451	20.7666	15.1221	34.3231
BnaA03g35840D	GSBRNA2G00137338001	chrA03:17499785-17502483	2007	0.577361	38.5195	37.7227	32.4902	50.7782	59.886	37.2063	37.3896	40.3814	27.1661	65.8957
BnaA03g36080D	GSBRNA2G00137306001	chrA03:17633981-17637490	1999	28.1982	24.7014	22.887	19.0105	9.76744	17.2814	19.2213	22.5231	23.2734	14.1517	3.62919
BnaA03g36390D	GSBRNA2G00154770001	chrA03:17814355-17816156	1305	7.43166	44.0593	58.6597	45.958	67.6082	73.6719	51.7398	59.4187	65.8844	36.0085	78.6997
BnaA03g37260D	GSBRNA2G00154891001	chrA03:18437241-18439520	1825	7.52182	12.3258	13.9983	11.4758	18.565	39.3507	13.9706	13.3664	17.7255	19.7255	26.6197
BnaA03g37560D	GSBRNA2G00154928001	chrA03:18625003-18628657	2958	0.130558	6.16413	7.71614	5.98224	7.16947	10.3715	5.41057	7.3776	7.93621	4.40744	13.0796
BnaA03g38910D	GSBRNA2G00113709001	chrA03:19347039-19349443	2102	0.638005	24.3351	32.0829	15.4863	43.7746	57.4866	25.8218	26.7579	24.8365	21.5071	37.8972
BnaA03g39260D	GSBRNA2G00113661001	chrA03:19570110-19575083	3124	0.426413	11.3383	17.0595	8.6965	27.3185	39.1635	12.6713	13.2235	11.3833	8.84501	23.2547
BnaA03g39490D	GSBRNA2G00113633001	chrA03:19704426-19706651	1565	1.32122	63.6127	66.9723	57.2864	96.9797	107.29	60.779	69.598	73.2543	54.5418	138.834
BnaA03g39840D	GSBRNA2G00113591001	chrA03:19904739-19911257	4059	0.298117	0.666602	1.29014	0.980702	1.4109	1.26205	0.882949	0.982776	1.1791	0.949409	1.2977
BnaA03g40500D	GSBRNA2G00113509001	chrA03:20235011-20236815	1202	2.58716	27.521	52.2802	22.5127	79.6495	153.834	36.5263	40.46	29.1214	21.605	44.784
BnaA03g40660D	GSBRNA2G00113484001	chrA03:20320936-20321894	865	3.3008	4.28517	3.26978	6.33666	15.5846	7.75432	2.24187	3.83026	6.70116	6.19932	9.16421
BnaA03g40940D	GSBRNA2G00151354001	chrA03:20495320-20496008	571	34.2073	51.5358	50.1835	57.3314	67.4426	86.9174	52.6782	75.4485	61.0678	86.7207	35.8491
BnaA03g41960D	GSBRNA2G00151221001	chrA03:21074015-21079798	3183	10.3808	40.6639	42.2655	37.966	55.3472	67.9277	36.6719	41.4418	43.3044	27.3858	58.3556
BnaA03g43160D	GSBRNA2G00151077001	chrA03:21656092-21658698	1051	0.63261	1.22266	1.21376	1.93584	3.30132	11.9038	1.08945	2.0256	4.61429	5.47302	6.40832
BnaA03g43350D	GSBRNA2G00151056001	chrA03:21779150-21780989	1051	0.554795	13.3689	12.7835	9.02248	12.8907	15.0007	10.4749	11.7665	12.0228	6.66122	15.2387
BnaA03g47910D	GSBRNA2G00075294001	chrA03:24653637-24656658	1281	16.5854	91.5245	76.724	77.7434	77.4003	111.083	63.9535	78.2433	99.4947	49.7559	114.972
BnaA03g48570D	GSBRNA2G00044271001	chrA03:24911780-24913426	1424	2.46523	4.62322	2.95078	5.48374	7.77982	12.0362	5.66963	6.25728	10.9279	12.1504	12.3505
BnaA03g48660D	GSBRNA2G00044281001	chrA03:24953213-24953825	519	3.77294	147.991	125.097	114.763	202.345	232.325	120.09	144.616	156.198	97.4582	259.951
BnaA03g48940D	GSBRNA2G00044320001	chrA03:25159851-25163957	2106	0.19647	1.37814	1.66105	1.3224	1.85721	3.09212	1.50939	1.59864	1.75799	1.06667	2.07761
BnaA03g50170D	GSBRNA2G00067421001	chrA03:26032819-26034296	1477	6.67041	13.0749	14.2947	20.4557	42.5683	56.0497	11.3972	18.2487	26.1203	33.7495	34.1879
BnaA03g50770D	GSBRNA2G00092678001	chrA03:26372941-26375158	1899	0.75697	37.0168	47.0196	26.2339	50.1936	55.5437	36.7139	43.6582	37.8486	29.9724	50.083
BnaA03g50780D	GSBRNA2G00092679001	chrA03:26376351-26378241	1797	0.407204	22.1088	27.6352	17.6121	30.5664	29.7961	21.8899	25.2776	22.2706	16.9489	26.7583
BnaA03g50900D	GSBRNA2G00092692001	chrA03:26413783-26416153	1143	22.0119	28.8892	28.1338	32.8693	50.6373	52.6813	27.7875	33.4196	39.3478	52.262	55.8857
BnaA03g51590D	GSBRNA2G00077733001	chrA03:26810566-26812517	1451	3.45516	9.44533	4.7634	8.06585	11.5568	12.5334	5.1666	7.19433	10.9791	13.8969	3.60636
BnaA03g52940D	GSBRNA2G00081778001	chrA03:27658342-27665800	2058	11.1554	9.42063	9.16428	6.05661	3.76095	4.29192	5.16123	6.90401	6.12757	5.20546	1.07951
BnaA03g53130D	GSBRNA2G00071518001	chrA03:27788160-27792685	3026	1.28733	82.5481	81.5701	72.9758	109.576	134.465	74.3022	80.3665	94.2065	60.6155	148.811
BnaA03g53200D	GSBRNA2G00071506001	chrA03:27891413-27893438	1644	0.343333	12.9578	14.2305	12.4032	17.957	22.3967	11.7357	13.8174	14.6086	9.69855	19.8362
BnaA03g53320D	GSBRNA2G00071484001	chrA03:27985887-27986749	862	20.5269	26.5235	25.9198	26.9378	37.0268	50.0567	29.5929	28.0724	34.1458	34.3625	25.928
BnaA03g53460D	GSBRNA2G00075217001	chrA03:28047516-28048767	998	27.6546	20.709	23.2711	21.3599	8.69248	10.5254	24.5327	24.787	20.0428	12.6572	6.52051
BnaA03g55320D	GSBRNA2G00017317001	chrA03_random:251175-251883	708	11.4149	29.1782	17.8983	40.152	109.608	108.571	15.0265	35.7368	55.4931	89.0878	71.438
BnaA03g55560D	GSBRNA2G00025284001	chrA03_random:329240-331555	1638	6.93483	6.11812	15.3197	14.2649	31.6343	6.46441	9.30798	6.26544	12.9635	8.90563	15.3005
BnaA03g55860D	GSBRNA2G00019720001	chrA03_random:445806-451618	3872	1.69483	1.97929	2.82988	3.55574	9.24965	5.47185	2.11929	2.23932	4.24811	5.07517	5.81599
BnaA03g56550D	GSBRNA2G00030379001	chrA03_random:772612-773983	1371	0.473371	2.2177	1.92876	3.54218	4.71883	5.04171	1.48257	5.38984	6.42953	3.34867	1.37438
BnaA03g56770D	GSBRNA2G00066780001	chrA03_random:864404-865712	1308	0.715516	5.99011	6.20744	6.04867	10.0963	11.3205	6.2271	6.36768	8.0951	4.51054	11.8977
BnaA03g56990D	GSBRNA2G00096788001	chrA03_random:950826-952038	1212	0.803824	35.196	35.7774	28.1869	57.5315	75.5626	37.0383	43.1585	39.8229	26.7306	70.3803
BnaA03g57420D	GSBRNA2G00023474001	chrA03_random:1138518-1140279	1761	0.406127	3.79551	4.32232	3.12928	4.2418	4.96721	5.705	4.805	5.96326	2.8848	8.40992
BnaA03g58390D	GSBRNA2G00036384001	chrA03_random:1661186-1665337	3188	20.7451	18.5043	15.2016	14.8776	6.79976	7.93248	15.1338	17.3485	19.0582	9.15822	3.9637
BnaA03g58450D	GSBRNA2G00003714001	chrA03_random:1686387-1689592	2391	3.5186	162.891	157.126	140.684	211.093	255.315	139.286	164.326	168	126.107	300.461
BnaA03g58460D	GSBRNA2G00023642001	chrA03_random:1696868-1700308	2527	0.822545	56.6731	57.4717	52.3303	84.8344	97.028	53.7805	58.8318	64.6115	50.1914	131.26
BnaA03g59140D	GSBRNA2G00065297001	chrA03_random:2192474-2193317	843	297.795	331.478	252.712	209.502	62.6791	87.4198	183.801	261.187	269.525	61.0932	6.08747
BnaA03g59650D	GSBRNA2G00028596001	chrA03_random:3711565-3713635	1607	0.909756	59.7092	57.6909	53.9265	61.2582	78.9553	52.296	62.5212	71.9866	35.3101	88.5982
BnaA03g59850D	GSBRNA2G00028638001	chrA03_random:3998666-3999909	579	32.2014	17.6428	22.4643	17.3874	6.53131	8.69256	14.7211	22.9608	17.7244	14.1651	13.4117
BnaA04g00410D	GSBRNA2G00149293001	chrA04:240976-243984	2121	44.4355	199.061	196.268	176.304	270.537	311.31	140.927	155.9	181.47	125.55	232.083
BnaA04g00630D	GSBRNA2G00149264001	chrA04:481474-483013	1539	15.8526	38.1534	41.7328	33.5396	60.9225	64.3219	39.8097	45.3141	46.093	37.1449	76.0648
BnaA04g02260D	GSBRNA2G00149065001	chrA04:1462057-1462243	186	85.0628	1036.42	711.62	747.062	1398.86	1648.41	827.896	1035.57	918.848	668.187	1517.34
BnaA04g02430D	GSBRNA2G00149041001	chrA04:1587651-1589593	1202	4.60173	9.97229	12.5141	10.4474	12.6755	14.4914	9.75941	11.241	10.7782	7.97024	15.6751
BnaA04g02760D	GSBRNA2G00126233001	chrA04:1845853-1847433	868	41.7253	60.4347	47.6883	60.9947	107.617	104.704	47.8471	57.1596	77.5637	82.7203	113.329
BnaA04g02800D	GSBRNA2G00126240001	chrA04:1875582-1876284	702	3.48615	16.0473	12.9662	26.8382	29.9315	22.4964	11.799	28.7963	35.0594	30.9546	12.459
BnaA04g02820D	GSBRNA2G00126242001	chrA04:1880940-1881948	779	18.6556	20.394	17.6503	16.0713	11.8543	5.49551	20.5727	19.5336	20.6955	8.54997	7.67246
BnaA04g03610D	GSBRNA2G00126366001	chrA04:2458405-2460621	1681	2.96522	158.582	152.134	141.803	210.468	223.33	137.042	174.516	169.072	120.068	293.055
BnaA04g03900D	GSBRNA2G00126410001	chrA04:2757930-2760248	1329	17.8012	22.3904	17.9127	15.0808	6.49524	13.097	11.1102	17.5035	16.1966	7.96976	1.44421
BnaA04g05320D	GSBRNA2G00021776001	chrA04:4106721-4109488	1960	1.76763	73.7897	70.6856	53.6247	120.335	152.987	69.2938	70.8299	78.9913	49.7109	122.695
BnaA04g05470D	GSBRNA2G00021754001	chrA04:4244816-4246287	1170	1.96906	4.14756	2.89095	6.75444	15.3914	12.2992	4.10577	5.35082	7.79457	13.2727	8.88868
BnaA04g06040D	GSBRNA2G00021681001	chrA04:4633418-4634381	963	2.78943	3.66979	4.02521	4.76269	11.2992	5.31412	4.13924	2.34586	3.9466	5.49926	15.1155
BnaA04g06350D	GSBRNA2G00111281001	chrA04:4898527-4899830	1057	2.54386	10.6821	4.54875	40.6073	36.4765	46.4121	14.3495	23.8138	3.51149	32.4379	52.193
BnaA04g06980D	GSBRNA2G00111182001	chrA04:5677116-5677875	759	46.8054	30.6485	28.1938	21.9783	8.79908	14.2987	14.3381	26.1441	24.9474	18.0734	1.85259
BnaA04g07520D	GSBRNA2G00114627001	chrA04:6452344-6454934	1368	28.5555	41.631	33.6031	47.318	82.5483	91.1072	30.0551	43.9397	61.1731	75.7969	47.1845
BnaA04g09500D	GSBRNA2G00114305001	chrA04:8493665-8494265	600	7.80492	20.8238	18.0229	28.6217	30.1456	26.7544	25.5955	29.9996	30.1603	36.6062	18.3397
BnaA04g09680D	GSBRNA2G00114273001	chrA04:8688664-8690223	1259	1.64191	3.77293	5.96449	3.89855	10.2797	17.9111	4.81893	5.20563	3.24053	3.65251	9.60497
BnaA04g10500D	GSBRNA2G00075051001	chrA04:9234191-9237186	1951	6.09154	11.0543	9.50926	13.307	31.0235	60.3474	12.888	9.99114	23.8665	34.7896	63.2075
BnaA04g10650D	GSBRNA2G00007616001	chrA04:9350516-9352519	1617	4.49101	8.68033	7.38555	15.5797	45.4898	25.2731	5.67516	10.6635	17.1015	11.6793	3.7476
BnaA04g11490D	GSBRNA2G00090342001	chrA04:9939473-9942138	1486	18.2981	14.5839	13.7105	12.1984	4.93333	7.94	8.56107	11.6135	12.1894	10.3657	1.18865
BnaA04g12240D	GSBRNA2G00090247001	chrA04:10419234-10422793	2475	1.26433	15.1086	11.9922	13.7544	22.8766	27.5228	14.7293	15.0962	13.7011	11.7495	26.8832
BnaA04g12980D	GSBRNA2G00032880001	chrA04:10937416-10948679	8035	5.64625	5.24027	5.87752	4.93502	2.12182	4.39081	5.24357	4.51934	5.42568	3.79022	0.899067
BnaA04g13950D	GSBRNA2G00068264001	chrA04:11809797-11811744	1478	1.04656	8.89688	11.0949	6.73595	38.2782	67.4229	12.6061	11.0249	7.97307	6.35926	15.4948
BnaA04g15600D	GSBRNA2G00089013001	chrA04:12903788-12904829	1041	15.2649	28.6628	29.7909	40.9639	93.9713	152.667	26.7033	42.3479	59.3208	91.1399	89.5267
BnaA04g17070D	GSBRNA2G00050427001	chrA04:13912872-13917491	1735	64.8659	63.5693	55.4277	57.4383	23.0872	36.1958	46.0141	60.0753	47.8171	31.7619	7.26948
BnaA04g17220D	GSBRNA2G00043485001	chrA04:14031031-14033477	1170	34.7085	38.6095	29.2088	27.4885	12.6998	17.9545	20.668	29.5069	26.879	16.4692	3.01069
BnaA04g18040D	GSBRNA2G00006337001	chrA04:14536462-14537137	491	12.1968	19.1228	16.1187	23.2085	45.3518	53.0913	13.7125	20.9415	21.0482	39.4017	25.6528
BnaA04g18240D	GSBRNA2G00006359001	chrA04:14663071-14666035	1823	0.379141	11.6663	10.7575	9.77476	19.6897	25.7024	13.8929	12.7716	13.3983	10.9811	27.767
BnaA04g19460D	GSBRNA2G00064623001	chrA04:15317986-15321550	2742	0.25627	7.59301	8.25351	7.19461	8.63685	11.5791	7.96544	8.73052	9.10346	4.94639	12.6836
BnaA04g19600D	GSBRNA2G00064608001	chrA04:15368332-15370330	1998	1.51088	4.2235	2.26588	4.90517	5.09643	6.69311	1.95581	3.0375	6.77917	6.77876	2.69504
BnaA04g20340D	GSBRNA2G00077003001	chrA04:15697498-15699770	1035	4.19376	108.763	97.9438	95.7757	166.041	173.574	102.175	109.666	117.112	75.7823	182.603
BnaA04g20360D	GSBRNA2G00077001001	chrA04:15705732-15707918	969	3.05595	92.309	82.8077	79.63	115.646	117.106	72.9645	87.8972	93.609	56.5845	131.389
BnaA04g20720D	GSBRNA2G00069663001	chrA04:15904778-15908428	1485	2.45876	3.06804	3.72061	3.58784	6.50955	10.0448	2.59336	3.32178	3.36003	8.40693	8.12331
BnaA04g22070D	GSBRNA2G00005367001	chrA04:16713201-16714313	834	24.0017	23.6501	23.6201	22.6582	85.301	36.7939	16.346	21.4896	12.925	28.0873	47.9881
BnaA04g23070D	GSBRNA2G00123321001	chrA04:17196634-17199325	1278	0.388844	1.99648	2.50265	2.72549	4.02403	5.99259	2.42588	2.20198	3.03983	2.50469	8.33422
BnaA04g23210D	GSBRNA2G00123302001	chrA04:17265150-17269180	2817	7.42317	6.06282	7.07497	7.69865	1.78847	2.82265	4.14231	5.75173	6.54231	2.69842	2.6912
BnaA04g24900D	GSBRNA2G00045084001	chrA04:18111650-18114109	1617	0.587982	34.8357	27.3356	29.7581	47.1171	47.0486	29.6758	36.4703	40.4162	24.7823	58.1527
BnaA04g26460D	GSBRNA2G00063277001	chrA04:18775130-18776802	786	7.47996	13.0719	10.9657	13.5586	29.3871	39.8279	14.7241	13.5137	20.5471	21.843	51.9084
BnaA04g26890D	GSBRNA2G00088645001	chrA04:19011277-19012195	918	6.06679	302.402	234.17	263.415	370.557	421.358	258.633	318.259	361.115	207.019	506.088
BnaA04g27220D	GSBRNA2G00003189001	chrA04_random:653-2036	1383	9.05334	10.0293	14.0178	14.6554	22.2197	25.7391	10.0247	13.1845	16.4314	19.7658	16.4293
BnaA04g27260D	GSBRNA2G00053336001	chrA04_random:13561-14962	1401	0.732472	29.4161	40.3574	32.3402	33.3536	60.1963	32.0764	29.9552	36.4039	21.0292	85.9914
BnaA04g27560D	GSBRNA2G00034336001	chrA04_random:158321-159423	761	2.55426	6.3305	6.5718	14.06	18.4889	25.3592	5.58164	8.31269	20.7064	15.1874	12.0623
BnaA04g27680D	GSBRNA2G00042563001	chrA04_random:218842-220395	1111	0.944247	60.2031	55.7067	52.4039	83.422	90.8005	57.119	60.2704	53.6443	41.7027	100.2
BnaA04g29360D	GSBRNA2G00008113001	chrA04_random:1342480-1344706	1547	6.90772	26.732	20.4817	21.9044	23.4603	27.4713	23.0351	23.8728	27.2755	13.0113	25.917
BnaA05g00800D	GSBRNA2G00132968001	chrA05:467360-468011	651	35.3205	313.942	305.626	271.909	355.897	372.794	257.86	322.52	354.498	231.593	436.915
BnaA05g00810D	GSBRNA2G00132966001	chrA05:471115-475305	3418	2.73876	171.206	180.513	149.909	219.501	256.429	158.058	180.684	195.557	119.715	292.389
BnaA05g01610D	GSBRNA2G00132863001	chrA05:937117-938467	1209	0.548739	39.1937	38.6625	33.9983	49.0193	54.7833	38.8898	40.0772	42.9257	26.0386	62.7421
BnaA05g01950D	GSBRNA2G00132823001	chrA05:1097232-1099475	1553	0.319097	8.91334	10.2511	8.7745	13.7963	14.5578	9.71898	10.7183	9.87101	6.43451	16.6695
BnaA05g02290D	GSBRNA2G00132783001	chrA05:1270206-1272410	1254	14.4735	20.1389	23.1231	21.6561	33.41	36.8725	23.253	25.3219	27.4854	25.8107	35.5699
BnaA05g02300D	GSBRNA2G00132782001	chrA05:1278019-1280077	1608	5.1531	8.13787	6.48914	9.06973	7.35589	14.7163	5.61739	11.1491	14.2575	7.80314	1.80278
BnaA05g02520D	GSBRNA2G00132757001	chrA05:1384992-1386814	916	1.54887	74.8055	60.1854	60.8717	103.136	122.975	53.4108	66.171	64.4755	50.7013	119.018
BnaA05g05550D	GSBRNA2G00116783001	chrA05:2903352-2908788	2012	2.34284	22.8081	24.3972	21.6788	25.8772	30.3437	21.8424	25.0438	25.99	15.2437	30.8834
BnaA05g05700D	GSBRNA2G00116799001	chrA05:2977414-2979963	1422	5.90488	15.815	16.4605	13.8547	11.8519	16.4043	14.0833	18.3256	17.7244	8.59546	13.1505
BnaA05g05930D	GSBRNA2G00116830001	chrA05:3109881-3111970	1694	5.60902	8.29141	7.42881	7.97723	9.50455	16.6058	7.26494	7.86069	12.5604	10.5062	12.1217
BnaA05g06580D	GSBRNA2G00116913001	chrA05:3583500-3586306	1580	3.58308	4.22661	4.13433	5.05381	12.1851	5.55633	7.1789	5.3638	5.22218	6.95318	14.1644
BnaA05g09030D	GSBRNA2G00050251001	chrA05:4958948-4961816	1779	4.32702	6.37468	6.40597	8.56718	14.2899	26.3197	8.26943	7.75427	14.5307	13.0301	20.1352
BnaA05g10500D	GSBRNA2G00095197001	chrA05:5743578-5747863	3040	0.553779	41.4541	48.0103	36.8811	66.0606	75.3136	45.3778	45.0315	47.8156	38.3827	93.4511
BnaA05g10680D	GSBRNA2G00095175001	chrA05:5831298-5834949	2511	4.40945	8.02132	8.03374	9.18664	23.0965	39.7918	8.3695	9.44921	15.1791	22.894	27.0355
BnaA05g10700D	GSBRNA2G00089162001	chrA05:5844993-5845756	510	9.5726	20.5699	17.7608	25.961	55.511	58.4884	16.8955	34.8908	29.4981	55.1465	38.4838
BnaA05g11360D	GSBRNA2G00048645001	chrA05:6358781-6360047	953	27.8954	20.6694	22.6422	16.7023	17.9335	8.40337	20.6005	18.2531	12.0485	32.4863	32.7384
BnaA05g12280D	GSBRNA2G00048498001	chrA05:7084229-7085964	1173	111.401	92.923	92.2462	74.4412	36.9934	42.9991	60.4549	90.6801	71.834	55.1651	10.9165
BnaA05g12980D	GSBRNA2G00066242001	chrA05:7658287-7663033	1703	2.47152	4.59241	5.12047	4.46213	9.71197	4.07287	2.36584	2.48931	2.45349	4.4153	8.01806
BnaA05g14020D	GSBRNA2G00125532001	chrA05:8546625-8547706	624	1.37537	65.9363	60.8074	59.5739	106.309	131.428	57.5777	73.939	68.6718	51.3321	143.6
BnaA05g14440D	GSBRNA2G00033288001	chrA05:8909360-8915806	3400	8.56596	8.94977	7.39567	6.52862	3.30902	6.59245	4.88379	5.92379	8.18832	4.57067	1.71058
BnaA05g16360D	GSBRNA2G00058611001	chrA05:11062718-11065605	1135	2.81137	8.4164	9.34322	6.64807	9.45894	11.07	6.02676	8.5078	9.29287	4.78247	9.21157
BnaA05g16950D	GSBRNA2G00048429001	chrA05:11738028-11740890	1495	0.861202	34.031	34.5646	31.1507	48.9163	55.7658	27.5174	33.8793	37.0171	27.4517	67.6158
BnaA05g18490D	GSBRNA2G00040218001	chrA05:13847409-13850934	3361	13.1296	9.09842	10.2672	9.0822	4.95301	7.52688	10.5242	8.76408	8.42063	7.03876	2.13842
BnaA05g18570D	GSBRNA2G00077370001	chrA05:13937174-13940024	2004	0.789763	2.37696	2.378	2.08952	4.26691	5.19148	2.4602	2.50694	2.6674	3.08954	5.6445
BnaA05g18860D	GSBRNA2G00029528001	chrA05:14273815-14274169	354	3.79503	119.755	119.187	112.134	208.533	235.274	123.802	150.942	145.408	93.6852	269.69
BnaA05g19210D	GSBRNA2G00029484001	chrA05:14506315-14509076	1783	2.0497	6.82073	6.95554	7.81403	10.5791	13.0033	6.83442	9.03941	11.184	8.80503	9.25196
BnaA05g19400D	GSBRNA2G00066356001	chrA05:14792148-14793248	871	44.3063	35.0562	37.1493	24.2126	13.2301	12.6338	26.4417	35.2778	26.0302	22.5446	7.96467
BnaA05g19820D	GSBRNA2G00009231001	chrA05:15246117-15249389	1985	0.873021	4.99421	6.2467	4.71021	6.38189	9.10021	5.53664	6.96595	7.55852	3.7782	8.45169
BnaA05g19830D	GSBRNA2G00009233001	chrA05:15250119-15256239	3499	0.163142	1.19947	2.17999	1.32958	1.92018	3.10927	1.55782	1.62876	2.25131	0.974545	1.98554
BnaA05g20240D	GSBRNA2G00009284001	chrA05:15644137-15644862	641	15.7571	18.5541	27.61	26.9937	49.5626	18.223	17.5768	25.405	26.5316	23.276	32.9453
BnaA05g20840D	GSBRNA2G00154052001	chrA05:16175496-16177949	1442	0.536118	22.6903	24.2253	19.2068	31.9436	44.4809	21.2863	25.4033	28.8714	12.851	39.1739
BnaA05g22270D	GSBRNA2G00153882001	chrA05:17024725-17030088	2690	4.51835	35.2389	32.4955	28.6422	46.1089	49.1529	27.9409	35.1809	36.2977	25.489	56.4148
BnaA05g22470D	GSBRNA2G00153859001	chrA05:17125267-17126691	693	33.2839	35.8567	35.1643	39.7279	76.7848	98.0681	34.1034	39.5879	46.055	73.4978	117.766
BnaA05g22710D	GSBRNA2G00153833001	chrA05:17234252-17238108	1784	0.590039	10.977	11.8589	10.2654	13.4282	16.3896	9.89701	10.2849	12.0251	7.703	20.2458
BnaA05g23160D	GSBRNA2G00153777001	chrA05:17559583-17560729	1146	5.13304	6.6234	7.95267	10.3422	15.6478	14.7234	8.44447	11.8028	10.4813	15.5809	11.8626
BnaA05g24100D	GSBRNA2G00104904001	chrA05:18143906-18144962	959	27.8244	54.2073	26.2307	24.4059	4.12464	10.9973	41.5035	31.5481	31.0338	15.3881	15.9479
BnaA05g24160D	GSBRNA2G00104898001	chrA05:18167608-18168687	756	23.0184	25.7335	19.6986	27.4124	48.5357	81.7033	19.4441	26.3151	30.9887	60.7111	47.5137
BnaA05g24610D	GSBRNA2G00104838001	chrA05:18363084-18368202	2657	3.23586	3.91377	1.71763	1.50992	0.371677	1.27691	1.66282	2.45996	2.29211	0.865452	0.156635
BnaA05g24830D	GSBRNA2G00104813001	chrA05:18502207-18504741	1951	4.92017	6.33816	6.45892	7.57328	12.4693	19.5224	5.60065	7.93626	11.0673	12.7566	12.1763
BnaA05g25240D	GSBRNA2G00104767001	chrA05:18719134-18721165	1429	19.8069	25.7047	10.848	11.4663	5.02039	6.66281	7.91484	19.3533	19.7121	4.88397	0.664574
BnaA05g25890D	GSBRNA2G00079391001	chrA05:19066481-19069161	1947	4.92643	298.387	295.916	255.896	385.321	401.465	248.282	305.896	332.664	205.865	518.319
BnaA05g25900D	GSBRNA2G00079392001	chrA05:19072075-19074317	1995	3.01579	112.813	132.663	84.7151	208.293	247.234	106.006	126.102	113.437	91.2227	235.707
BnaA05g26490D	GSBRNA2G00000167001	chrA05:19394218-19396152	1329	1.01783	30.1665	33.7138	22.375	63.2545	80.1972	30.5983	39.3041	34.2328	28.0827	61.6408
BnaA05g27280D	GSBRNA2G00000263001	chrA05:19700443-19702059	1256	3.55175	4.93425	4.54474	5.91989	10.2449	13.0335	3.87203	5.46657	5.98898	10.7447	10.7474
BnaA05g28390D	GSBRNA2G00000396001	chrA05:20169390-20172100	1522	17.5438	16.8396	11.5036	14.3282	6.13049	9.85881	17.5845	11.143	13.3038	11.3618	11.1791
BnaA05g28870D	GSBRNA2G00080698001	chrA05:20369399-20372057	1647	14.8336	11.0494	14.8427	10.6038	6.83435	5.07847	8.82276	11.777	9.36635	14.5896	5.78058
BnaA05g30880D	GSBRNA2G00027071001	chrA05:21343616-21346299	1422	2.60633	8.31055	10.2128	6.26576	11.7636	14.9519	7.29287	10.592	8.72977	4.89886	8.3585
BnaA05g31720D	GSBRNA2G00038568001	chrA05:21872670-21874177	1013	2.01059	5.89178	3.38891	6.56912	18.7575	24.9616	2.98388	5.6317	9.16829	10.3412	11.676
BnaA05g32260D	GSBRNA2G00076135001	chrA05:22116463-22119224	1731	0.76666	9.93427	10.4331	8.32891	15.537	20.6353	10.0926	10.6828	11.3233	8.84498	19.8719
BnaA05g32340D	GSBRNA2G00076127001	chrA05:22135673-22138998	1874	1.18948	7.82258	7.65269	6.88509	8.81843	13.2649	7.5681	8.39438	9.33876	5.97321	14.0955
BnaA05g33110D	GSBRNA2G00092887001	chrA05:22539611-22543516	1722	2.0542	2.89375	4.45142	4.00934	9.61982	2.57555	2.62632	1.74879	2.59336	2.55932	5.69512
BnaA05g33490D	GSBRNA2G00022316001	chrA05:22673064-22676351	1812	18.6817	20.5336	23.8983	24.2303	45.7102	64.6377	27.1791	24.1695	27.7027	50.4594	84.8082
BnaA05g33680D	GSBRNA2G00064118001	chrA05:22736815-22737232	417	12.8044	585.547	562.926	470.383	1207.26	992.061	545.687	672.489	602.042	563.012	1152.17
BnaA05g34110D	GSBRNA2G00064167001	chrA05:23031774-23037597	3495	0.376666	14.3398	15.9069	13.0392	18.8432	24.9942	13.7776	14.4674	16.4913	11.6851	27.0096
BnaA05g34130D	GSBRNA2G00064169001	chrA05:23044381-23047236	2103	3.99043	8.0395	9.75848	8.50153	9.1697	10.7104	7.5775	8.96938	10.1054	7.17361	10.3443
BnaA05g34410D	GSBRNA2G00016979001	chrA05_random:119224-119933	709	120.33	99.9787	86.4736	71.3636	34.1068	60.546	64.628	82.5659	81.4737	48.4136	67.1298
BnaA05g34540D	GSBRNA2G00011209001	chrA05_random:193266-195579	1927	1.36645	5.18644	2.59208	4.91637	6.12941	6.57644	2.11455	3.14098	7.57552	7.4784	1.27499
BnaA05g37400D	GSBRNA2G00097708001	chrA05_random:2979452-2981047	1249	15.7757	7.98907	10.2522	9.2934	2.59498	4.04408	6.03517	8.69715	7.59117	4.67257	0.598642
BnaA06g01180D	GSBRNA2G00024673001	chrA06:759467-760540	1073	6.19483	7.16069	12.9188	12.0676	20.2351	3.46547	8.04845	6.28264	10.2599	6.41822	16.9793
BnaA06g01350D	GSBRNA2G00003335001	chrA06:843096-844135	503	1.65624	64.4922	61.0569	57.2261	103.908	124.892	51.712	60.1949	57.2798	53.0863	138.267
BnaA06g01680D	GSBRNA2G00008261001	chrA06:1012468-1013322	701	98.2722	122.296	89.6959	98.9689	55.8241	31.4785	96.4671	116.904	99.8921	62.1219	55.6235
BnaA06g02680D	GSBRNA2G00021151001	chrA06:1612303-1615104	1520	27.0278	17.6359	19.7064	17.8396	7.01644	13.8408	21.6321	20.3759	17.6964	10.8899	2.65078
BnaA06g02960D	GSBRNA2G00098069001	chrA06:1800240-1802998	2758	1.65293	2.13249	1.79488	2.30915	7.71114	10.2184	3.89744	9.44623	1.91873	8.16057	7.2011
BnaA06g05490D	GSBRNA2G00156168001	chrA06:3112735-3113742	927	4.255	6.12914	6.7334	12.0735	31.634	47.631	7.42896	9.48041	20.8468	30.773	67.2938
BnaA06g06160D	GSBRNA2G00156098001	chrA06:3364736-3365881	1047	20.3926	26.7607	19.9246	24.683	60.7229	30.3991	24.1022	18.9831	18.1098	27.5378	93.7364
BnaA06g06510D	GSBRNA2G00156056001	chrA06:3506890-3509768	2025	10.6722	9.26103	9.69104	8.82566	3.03957	2.83018	9.03007	12.4697	10.2599	2.47828	1.45395
BnaA06g06610D	GSBRNA2G00105252001	chrA06:3562211-3562718	507	4.411	275.657	256.987	215.035	398.969	455.541	220.094	283.649	310.321	185.602	472.431
BnaA06g07350D	GSBRNA2G00105340001	chrA06:3910318-3911914	1596	1.16683	76.824	78.3898	68.5442	98.4288	117.313	75.3635	87.8367	92.2428	52.1694	140.081
BnaA06g08140D	GSBRNA2G00105441001	chrA06:4352322-4356881	2911	13.2736	21.6841	12.3279	11.5407	2.81272	7.24711	9.04068	13.1192	14.9832	4.37117	3.31728
BnaA06g08460D	GSBRNA2G00105478001	chrA06:4591079-4593132	1245	10.8099	21.0555	25.4985	19.3803	30.861	33.8995	24.6719	21.8853	21.8792	15.7448	34.3408
BnaA06g08900D	GSBRNA2G00105529001	chrA06:4822726-4825769	2010	3.67323	50.6675	45.4393	44.2703	43.74	52.0757	42.2464	51.2079	59.4619	22.9776	58.339
BnaA06g09070D	GSBRNA2G00092331001	chrA06:4915486-4916991	1170	7.24467	21.4218	24.4514	20.9393	33.1189	31.0557	23.2266	23.9886	25.4271	22.4638	39.6208
BnaA06g09240D	GSBRNA2G00081694001	chrA06:4990237-4992243	1663	2.28833	135.026	145.692	127.771	200.294	222.916	128.898	135.116	154.774	114.634	275.451
BnaA06g09880D	GSBRNA2G00062214001	chrA06:5269581-5274921	4383	0.638411	1.71915	0.944583	1.08803	2.24653	3.4371	1.13889	0.5305	4.21929	4.08197	2.07325
BnaA06g10790D	GSBRNA2G00057939001	chrA06:5660569-5661729	863	2.65265	7.39541	9.7875	7.12306	12.0614	14.7699	7.69764	9.60982	10.3528	8.57764	13.4992
BnaA06g10890D	GSBRNA2G00057950001	chrA06:5686670-5690302	1677	0.559785	9.13041	11.3582	9.60964	14.0428	19.6961	9.863	12.3356	12.0391	8.7529	20.749
BnaA06g11320D	GSBRNA2G00058004001	chrA06:5907030-5907883	762	7.23998	9.19258	7.57067	12.2618	31.0164	63.194	5.29155	8.53859	15.6543	21.6002	15.0056
BnaA06g12890D	GSBRNA2G00035639001	chrA06:6755498-6756866	1368	2.30882	6.80503	6.12616	13.8787	14.1457	15.6314	4.88602	11.9621	17.8248	10.3953	7.10021
BnaA06g13170D	GSBRNA2G00035606001	chrA06:6893622-6895361	1666	0.519672	33.991	28.8842	24.8215	45.0294	49.5389	26.8547	28.8817	32.6739	21.5969	54.7713
BnaA06g15550D	GSBRNA2G00125471001	chrA06:8517993-8519239	734	68.5462	66.3326	57.7244	51.3808	23.5197	34.2309	60.7563	59.5652	60.8045	21.5761	11.5122
BnaA06g15820D	GSBRNA2G00125437001	chrA06:8684158-8684921	670	11.0236	513.463	468.452	467.333	629.186	708.396	366.289	511.738	562.918	303.68	787.978
BnaA06g15870D	GSBRNA2G00125430001	chrA06:8703860-8706094	1816	16.9326	24.8796	25.6863	32.5853	42.0162	41.2731	22.6806	27.729	35.3243	45.8175	49.6438
BnaA06g17510D	GSBRNA2G00107195001	chrA06:9988583-9991859	2047	9.19036	7.34292	4.67178	5.12975	1.78134	4.92296	7.23965	6.8928	9.16561	2.55231	1.16792
BnaA06g17850D	GSBRNA2G00107239001	chrA06:10175762-10177975	1287	23.3274	28.7863	28.7225	35.4165	88.9572	120.205	29.014	36.0775	48.9623	81.9994	135.986
BnaA06g17950D	GSBRNA2G00107253001	chrA06:10232148-10233078	873	4.1911	6.83848	5.53496	6.56557	12.4662	17.3275	6.25392	5.91182	8.71606	5.35805	9.66804
BnaA06g17960D	GSBRNA2G00107254001	chrA06:10238137-10239776	1483	1.77774	4.61529	5.47226	9.19743	11.4981	11.8127	3.74052	9.6684	8.81297	7.23407	5.65434
BnaA06g18440D	GSBRNA2G00107313001	chrA06:10591671-10593539	1315	9.34551	17.5189	15.1054	19.9054	19.4104	21.921	19.5988	20.2692	25.8333	27.9515	7.50622
BnaA06g19700D	GSBRNA2G00046506001	chrA06:12214163-12217050	1939	0.34727	19.6079	17.7144	17.244	35.6385	38.7585	18.4346	20.847	20.6833	18.8414	45.6636
BnaA06g19910D	GSBRNA2G00061514001	chrA06:12609413-12612427	1699	0.490518	21.3473	21.4946	17.7072	29.4547	40.5839	20.7336	23.4273	25.7977	15.9946	42.9296
BnaA06g20250D	GSBRNA2G00061417001	chrA06:13355339-13358400	1992	0.889061	21.2674	24.6257	17.0617	45.637	59.6126	22.4228	22.3228	21.9547	18.0229	46.7399
BnaA06g21090D	GSBRNA2G00109745001	chrA06:14651354-14653360	1581	9.27827	20.2648	18.6931	26.0706	54.4506	66.6162	18.2187	25.3918	36.9051	53.7607	76.0776
BnaA06g21100D	GSBRNA2G00109746001	chrA06:14654726-14655146	420	3.8058	185.875	152.498	137.572	253.559	297.281	126.612	180.303	175.898	140.377	316.712
BnaA06g21470D	GSBRNA2G00109796001	chrA06:14903024-14904155	1011	6.65276	7.3419	7.28592	12.1244	17.9563	19.4288	9.53962	9.05741	12.3643	21.7499	20.9751
BnaA06g22030D	GSBRNA2G00109882001	chrA06:15402997-15404567	1345	1.56106	17.2416	11.9299	21.7147	72.8623	170.314	16.4046	18.3259	57.3207	84.6059	148.824
BnaA06g22060D	GSBRNA2G00109885001	chrA06:15417608-15420597	2131	6.17453	8.98547	10.4079	15.0325	28.9686	31.8574	8.93868	11.8687	19.2169	27.024	29.0495
BnaA06g23180D	GSBRNA2G00077283001	chrA06:16148590-16154160	4140	0.178367	2.43608	4.23856	2.1826	5.77709	9.35368	3.1219	3.41549	2.77993	2.3213	5.40702
BnaA06g23600D	GSBRNA2G00000837001	chrA06:16382925-16384334	1409	2.83907	6.98506	5.8728	10.0083	11.6359	12.6984	3.63893	8.09773	11.8946	11.3743	4.99659
BnaA06g24410D	GSBRNA2G00000718001	chrA06:16997115-17000062	1889	3.787	15.1478	17.015	14.1246	16.4761	17.3888	12.5902	16.5901	17.4419	11.1503	22.3919
BnaA06g24830D	GSBRNA2G00000668001	chrA06:17254430-17256514	1625	0.683801	2.36263	4.12778	2.32207	3.60647	6.15064	1.80875	3.23588	3.084	2.14174	4.79088
BnaA06g25030D	GSBRNA2G00000645001	chrA06:17305929-17308533	1748	29.0723	51.1123	47.8316	48.9117	54.6992	72.3996	47.9909	54.907	58.5459	41.126	62.1772
BnaA06g25550D	GSBRNA2G00042107001	chrA06:17672089-17674087	1594	15.974	25.7457	15.8969	24.0393	60.5967	74.2962	18.0031	17.1902	34.1568	46.3286	102.422
BnaA06g26510D	GSBRNA2G00147475001	chrA06:18226244-18228489	1608	30.0446	27.082	19.4599	13.9718	3.16791	8.91182	12.9006	22.56	26.8617	3.66314	0.0660511
BnaA06g26560D	GSBRNA2G00147481001	chrA06:18248866-18253970	2463	25.8874	28.083	22.3039	17.4837	6.04147	12.8953	17.4339	25.7621	20.7374	7.98197	2.69886
BnaA06g26670D	GSBRNA2G00147499001	chrA06:18318912-18319847	609	3.58966	255.644	231.513	222.007	335.1	319.611	209.072	255.037	284.83	165.426	437.56
BnaA06g27700D	GSBRNA2G00147638001	chrA06:19051402-19054759	2139	0.239764	4.64748	5.17736	3.47003	6.01393	7.23927	4.18332	4.24545	5.0694	3.59498	7.00772
BnaA06g29240D	GSBRNA2G00144294001	chrA06:19969923-19971443	1304	1.13378	81.2563	79.2612	76.1942	96.0035	112.927	72.5801	87.5519	95.795	50.0498	130.579
BnaA06g30420D	GSBRNA2G00144446001	chrA06:20549606-20551397	1491	9.82092	415.066	391.589	357.78	772.455	905.416	376.155	415.401	445.375	387.986	894.305
BnaA06g31290D	GSBRNA2G00144552001	chrA06:21065185-21067780	2092	2.30145	16.3504	44.158	15.0601	31.1835	60.1994	16.5603	25.1335	19.5386	9.919	26.639
BnaA06g31300D	GSBRNA2G00144554001	chrA06:21069959-21072082	1582	0.616325	1.47839	2.85406	1.29556	2.59024	6.24546	2.02508	2.34353	1.5737	1.45406	4.74042
BnaA06g31320D	GSBRNA2G00144556001	chrA06:21077203-21079483	1959	4.6712	163.445	181.32	140.613	301.429	329.437	186.041	198.326	195.265	160.105	348.614
BnaA06g31630D	GSBRNA2G00144593001	chrA06:21199458-21200550	1092	6.83	14.8641	15.3205	24.4954	34.9618	31.8579	11.8475	28.968	27.8634	31.4982	17.047
BnaA06g31640D	GSBRNA2G00144594001	chrA06:21201546-21202254	621	12.1795	18.0314	17.6528	25.1053	46.7759	40.8762	12.8237	18.6555	23.7933	34.6373	27.3851
BnaA06g32020D	GSBRNA2G00078146001	chrA06:21427806-21429648	1470	3.9793	11.3852	15.2773	13.7132	13.0247	15.7851	15.0998	17.0469	18.3459	10.9697	17.3165
BnaA06g33260D	GSBRNA2G00078007001	chrA06:22006164-22008436	1357	13.3671	27.676	26.0498	26.221	36.3201	37.8783	26.6712	27.562	30.6512	22.0402	39.2494
BnaA06g33560D	GSBRNA2G00088744001	chrA06:22291324-22291837	513	23.7328	17.1012	14.3248	11.075	1.94544	1.28805	4.67246	11.6561	9.87506	3.54063	0.343299
BnaA06g33910D	GSBRNA2G00081611001	chrA06:22452630-22455755	2292	24.6732	56.3718	61.4025	55.406	69.6028	88.6344	52.4431	61.9443	64.296	53.5639	82.9433
BnaA06g33960D	GSBRNA2G00081619001	chrA06:22480870-22484422	1929	4.48283	6.88955	7.87636	6.84497	11.5258	13.9243	6.54988	6.35024	6.67446	9.3622	11.1472
BnaA06g34240D	GSBRNA2G00001812001	chrA06:22636903-22638029	885	15.102	17.0905	16.1772	21.8373	36.6056	30.6463	11.4072	18.7581	24.9081	30.3719	31.5447
BnaA06g34320D	GSBRNA2G00001821001	chrA06:22667474-22668380	587	5.23748	8.739	16.6174	11.2414	23.0488	4.34901	13.828	8.53008	9.00664	14.888	14.4626
BnaA06g34530D	GSBRNA2G00001848001	chrA06:22819825-22825185	2037	5.65326	7.66737	8.15525	8.1369	13.0332	18.0525	7.0262	7.87377	11.0123	13.5104	9.23403
BnaA06g34760D	GSBRNA2G00001872001	chrA06:22969029-22974129	1503	0.373465	10.6105	17.7992	14.6364	8.54073	18.4222	12.9939	13.4713	16.4389	5.81952	25.2284
BnaA06g35100D	GSBRNA2G00001911001	chrA06:23178692-23179882	951	5.87174	6.9236	7.5271	10.9151	19.327	21.9658	6.31162	9.77239	10.7425	22.2019	18.4056
BnaA06g35120D	GSBRNA2G00001914001	chrA06:23184972-23185657	685	6.18258	11.3012	8.98682	13.153	27.5706	29.5429	7.30702	11.1074	18.2259	25.3319	7.99761
BnaA06g35470D	GSBRNA2G00001953001	chrA06:23305119-23307528	1585	12.7092	44.962	44.9656	41.5315	60.3547	72.9345	44.3761	49.5472	52.906	35.4277	79.5216
BnaA06g35670D	GSBRNA2G00054757001	chrA06:23426776-23427769	789	1.53453	67.2121	64.6335	57.3121	82.9568	102.033	58.012	67.515	75.3764	44.6992	122.087
BnaA06g36250D	GSBRNA2G00018769001	chrA06:23764966-23767356	1509	7.05857	6.76623	6.64222	5.47371	2.83751	1.57498	5.3161	6.30197	4.63291	3.41818	2.74595
BnaA06g36710D	GSBRNA2G00018828001	chrA06:24010801-24012736	1839	2.96699	3.59077	2.89157	5.04756	9.08142	6.69421	3.09171	4.3827	7.64939	8.79492	5.00559
BnaA06g37010D	GSBRNA2G00018865001	chrA06:24144774-24146238	1176	6.11701	5.54841	5.54725	7.01594	13.7495	22.1209	11.2131	5.12074	9.44878	4.91158	6.53879
BnaA06g38470D	GSBRNA2G00096568001	chrA06_random:560475-561289	814	52.3286	64.2554	64.949	80.9939	175.061	169.266	50.5982	82.0277	110.875	136.832	183.081
BnaA06g38950D	GSBRNA2G00087127001	chrA06_random:1037202-1038178	976	6.17819	30.8643	24.7961	56.7304	49.9025	57.0756	24.0467	52.2602	62.3891	49.5944	20.304
BnaA06g39280D	GSBRNA2G00092450001	chrA06_random:1465951-1467009	764	29.6725	21.4431	21.552	23.7956	8.61336	11.0171	25.4717	26.0068	20.5379	14.9705	4.43882
BnaA06g40080D	GSBRNA2G00025864001	chrA06_random:1870879-1872103	708	26.5321	28.5073	31.4721	33.148	62.3744	35.0127	28.1032	24.6255	29.1044	27.2134	53.3207
BnaA06g40660D	GSBRNA2G00020049001	chrA06_random:2148798-2150528	1401	14.5059	22.3717	21.105	25.7138	61.969	20.8083	23.5868	14.6966	20.1476	26.792	67.4949
BnaA06g40790D	GSBRNA2G00020062001	chrA06_random:2182102-2184712	2568	1.57363	28.1895	34.1733	26.7153	43.5249	49.5032	31.1976	32.6323	34.6034	23.6399	54.2197
BnaA07g00460D	GSBRNA2G00050738001	chrA07:342701-345035	1783	1.78396	3.61556	2.05895	3.36413	4.33934	6.7246	2.31593	2.16389	4.00094	4.71966	3.83657
BnaA07g00870D	GSBRNA2G00059448001	chrA07:614477-617853	1864	7.7314	92.8604	110.576	89.7158	120.788	149.893	98.5108	108.674	114.762	71.7644	169.25
BnaA07g03490D	GSBRNA2G00047637001	chrA07:3122759-3126561	2343	0.439078	1.61456	3.08762	1.60879	3.46525	5.62591	2.51677	2.83328	2.3072	1.48835	2.37802
BnaA07g05380D	GSBRNA2G00128236001	chrA07:5743766-5749308	1510	36.3562	27.1438	31.1649	19.8941	5.77404	21.0319	16.977	18.7322	19.5995	33.5604	3.42883
BnaA07g06460D	GSBRNA2G00128389001	chrA07:6775404-6777739	1309	21.491	26.5481	21.0557	26.9204	32.6833	62.4918	28.0511	28.1747	38.2989	41.3105	50.4265
BnaA07g07570D	GSBRNA2G00076199001	chrA07:7849875-7852244	2149	7.14028	44.2479	29.7264	23.1741	13.2862	10.4883	8.3501	7.43617	6.20002	15.4707	8.61976
BnaA07g08200D	GSBRNA2G00089849001	chrA07:8344424-8345581	836	0.72255	17.4646	26.4868	13.348	39.7144	45.9404	18.7007	24.375	18.2636	11.2049	26.3437
BnaA07g10650D	GSBRNA2G00085912001	chrA07:10054146-10056711	1574	16.1108	28.0778	29.0228	27.6993	34.5501	43.2124	29.322	30.2974	30.5715	27.0209	39.6415
BnaA07g11370D	GSBRNA2G00112341001	chrA07:10604388-10610669	1907	68.1446	102.906	67.7847	43.7549	16.6793	30.4473	68.2328	89.2361	55.3731	25.7566	4.6508
BnaA07g12410D	GSBRNA2G00081689001	chrA07:11273602-11274856	1159	2.97806	9.45711	6.47619	12.608	14.2754	15.342	5.49828	9.1663	13.6859	12.6308	4.19341
BnaA07g12830D	GSBRNA2G00081637001	chrA07:11472577-11478435	2305	10.939	8.15525	7.70518	7.0055	3.1513	5.53138	6.02111	7.4354	6.23475	5.14958	1.35792
BnaA07g14070D	GSBRNA2G00118778001	chrA07:12494498-12496152	936	2.00259	3.56054	3.37519	4.00524	13.8127	14.6524	2.18	3.35633	5.47638	13.2862	18.9757
BnaA07g14280D	GSBRNA2G00088390001	chrA07:12628640-12630819	1113	6.06506	6.48574	10.594	10.3243	18.4739	9.15541	7.7842	7.02897	7.85911	11.4469	18.4469
BnaA07g14690D	GSBRNA2G00098523001	chrA07:12900228-12907775	2996	0.208924	8.08537	9.22643	7.94334	12.777	15.6338	8.53552	8.62075	9.63539	7.20791	17.6787
BnaA07g15740D	GSBRNA2G00098662001	chrA07:13520757-13522371	1614	2.26355	106.167	108.199	86.9533	167.865	202.961	106.185	119.063	115.382	93.0071	219.695
BnaA07g15770D	GSBRNA2G00098666001	chrA07:13544403-13545742	808	7.18725	23.0703	21.9257	25.3158	52.8929	51.8161	19.645	30.7655	35.9559	38.4235	43.8172
BnaA07g16250D	GSBRNA2G00098727001	chrA07:13817141-13818980	825	1.85695	34.8362	32.9016	31.4515	42.0297	42.3097	27.4808	33.947	34.5636	21.6988	56.5256
BnaA07g16420D	GSBRNA2G00098748001	chrA07:13894978-13898537	2309	4.31333	3.11159	3.86999	3.49601	1.20548	1.65506	2.37499	2.99868	3.04163	3.13904	2.6098
BnaA07g16480D	GSBRNA2G00098755001	chrA07:13925248-13929217	2532	0.261477	15.2009	16.5693	12.2842	25.5708	30.0884	16.5213	14.8271	17.2744	11.8006	29.6477
BnaA07g17280D	GSBRNA2G00098861001	chrA07:14469497-14471165	888	0.787972	7.85353	7.27334	7.64058	11.1599	18.7282	8.07878	8.44035	9.96056	6.06056	15.8735
BnaA07g17460D	GSBRNA2G00098887001	chrA07:14618299-14618999	700	4.62403	382.127	336.006	316.032	393.989	370.939	79.5338	82.2577	59.4589	179	411.446
BnaA07g17850D	GSBRNA2G00098933001	chrA07:14792433-14794752	1552	6.70271	11.4334	11.667	10.1463	16.0535	19.5003	12.2386	11.5207	13.4522	12.5089	15.3919
BnaA07g18550D	GSBRNA2G00099011001	chrA07:15089970-15093068	1820	0.752976	11.5847	11.6604	11.8067	17.3564	21.0244	11.2448	12.6791	13.9831	8.16362	23.913
BnaA07g18750D	GSBRNA2G00099032001	chrA07:15212495-15213819	982	2.59599	97.2938	96.8464	82.0399	163.217	196.526	98.717	122.603	112.633	87.0484	217.434
BnaA07g18960D	GSBRNA2G00099054001	chrA07:15274873-15277625	1864	1.32338	89.6366	98.3655	82.7445	110.758	126.528	85.6795	101.888	110.613	62.1	162.082
BnaA07g19230D	GSBRNA2G00099084001	chrA07:15473669-15474317	648	0.960613	42.1453	43.4072	28.4492	69.5941	79.2089	41.9527	48.9335	39.1075	29.5401	67.6326
BnaA07g19700D	GSBRNA2G00099138001	chrA07:15670424-15673162	1711	0.373337	20.3149	26.7797	20.5597	26.8437	38.1654	21.2447	24.5846	24.9856	14.958	38.0777
BnaA07g20840D	GSBRNA2G00099269001	chrA07:16242999-16246794	2984	1.72414	1.89635	1.80651	3.2497	7.22673	3.78961	0.833364	0.971527	2.36303	2.94164	1.52979
BnaA07g21490D	GSBRNA2G00099351001	chrA07:16630155-16631174	885	25.7801	33.1029	27.2077	50.3458	85.144	46.9413	50.2886	37.5977	57.6663	79.37	133.125
BnaA07g22480D	GSBRNA2G00099470001	chrA07:17137950-17143065	3370	0.36783	17.1423	19.6914	18.3899	19.9928	24.3129	17.9175	17.836	21.3403	12.8692	32.4193
BnaA07g22620D	GSBRNA2G00099492001	chrA07:17216971-17221981	1848	39.6373	18.7575	32.5581	34.6557	29.5891	14.7916	36.9252	43.3118	31.0832	37.4788	22.685
BnaA07g24860D	GSBRNA2G00124394001	chrA07:18554803-18560044	3520	0.823616	1.34515	1.34513	2.20289	3.50412	1.04689	0.821406	1.47347	2.68159	2.08414	1.52552
BnaA07g25350D	GSBRNA2G00124454001	chrA07:18878319-18883851	1937	2.01044	5.53811	8.55014	5.55978	12.4252	16.3243	7.76969	7.56406	6.72857	5.4975	12.9012
BnaA07g25540D	GSBRNA2G00124475001	chrA07:18954150-18955140	683	41.9334	44.8823	24.7521	28.741	8.53079	11.9101	27.1576	36.9282	31.4328	9.93547	1.40653
BnaA07g25880D	GSBRNA2G00102200001	chrA07:19119390-19120686	1296	2.83573	10.2917	9.4473	14.7974	26.7057	28.8208	5.89227	13.1193	17.7602	20.5726	18.377
BnaA07g26300D	GSBRNA2G00102147001	chrA07:19362016-19364383	1915	0.801076	4.59549	12.3393	3.91311	11.2346	20.4545	6.67224	8.2089	5.50019	3.34356	10.4165
BnaA07g26840D	GSBRNA2G00102084001	chrA07:19612216-19613302	1086	0.53846	35.4188	38.2075	30.1489	48.7515	51.906	33.4139	38.855	42.6348	23.9758	64.1487
BnaA07g27960D	GSBRNA2G00101949001	chrA07:20245450-20248495	2212	3.40954	4.88706	3.32791	4.3292	6.55828	9.74803	3.85235	4.06605	5.64238	6.7907	10.4982
BnaA07g28600D	GSBRNA2G00066591001	chrA07:20660123-20661562	1439	10.7436	17.5199	17.0816	24.1723	44.7511	64.3537	15.62	24.0436	34.8897	42.1378	44.8397
BnaA07g28840D	GSBRNA2G00102408001	chrA07:20782781-20784865	1694	11.6268	16.6886	16.8108	23.0454	35.1343	41.8306	14.5563	21.2672	26.5698	37.4132	30.5949
BnaA07g28880D	GSBRNA2G00102413001	chrA07:20806156-20806804	564	8.53834	25.524	22.979	39.412	96.6934	130.748	26.0709	39.0092	63.9557	68.8097	65.5208
BnaA07g28890D	GSBRNA2G00102415001	chrA07:20812691-20814654	901	0.536343	9.47434	11.6921	9.16536	14.437	16.7389	9.51255	11.7193	11.6445	7.96798	23.229
BnaA07g29470D	GSBRNA2G00102486001	chrA07:21091604-21093555	1421	21.4873	40.9106	39.6376	52.9225	111.388	158.939	44.611	52.5299	78.5964	108.672	158.545
BnaA07g30160D	GSBRNA2G00102563001	chrA07:21408446-21410074	1026	14.1501	14.6962	15.9141	11.8543	3.12651	5.5052	10.0878	8.32599	10.9593	3.59724	0.882169
BnaA07g30180D	GSBRNA2G00102567001	chrA07:21420597-21421364	767	25.4132	19.04	16.2632	13.9909	6.81424	7.66675	14.4252	15.9153	19.9452	7.6068	0.580763
BnaA07g30920D	GSBRNA2G00102656001	chrA07:21759422-21760042	525	3.21397	13.2456	17.9208	29.6262	41.0261	50.4221	11.3401	26.951	33.8943	32.7833	14.0771
BnaA07g30990D	GSBRNA2G00102664001	chrA07:21791035-21791839	804	5.85502	7.82571	13.5011	8.64345	17.0461	23.1503	9.05755	12.1233	9.24013	7.58039	16.3614
BnaA07g32220D	GSBRNA2G00146657001	chrA07:22364908-22367785	1360	14.479	18.3329	18.5808	21.9108	37.0594	23.0015	14.9352	14.1003	19.3587	20.8055	33.4849
BnaA07g32920D	GSBRNA2G00146585001	chrA07:22678175-22678643	468	1.89309	195.689	177.513	147.991	136.83	144.665	147.289	218.595	231.738	78.8144	206.218
BnaA07g33190D	GSBRNA2G00146548001	chrA07:22830688-22831453	765	2.20935	93.8657	97.1971	69.7024	166.34	201.933	88.7737	107.645	95.9272	74.3701	196.109
BnaA07g33410D	GSBRNA2G00146524001	chrA07:22925565-22927410	1845	1.90879	2.51744	2.75418	2.90726	6.39847	1.56255	2.12855	1.06694	2.05827	2.31519	3.91981
BnaA07g33470D	GSBRNA2G00146518001	chrA07:22957666-22961673	2142	1.21481	2.90164	3.33652	2.66548	3.66226	5.10827	3.47097	3.13715	3.629	2.47724	4.11574
BnaA07g33680D	GSBRNA2G00146497001	chrA07:23043876-23044951	1075	3.33295	2.96276	4.89265	6.83567	20.1132	8.06152	2.69245	3.05376	6.1615	6.62168	5.24004
BnaA07g33690D	GSBRNA2G00146496001	chrA07:23045204-23047394	1554	2.06936	1.47211	3.07004	3.75675	11.8485	4.62092	2.30326	1.82924	4.37364	3.17174	2.54473
BnaA07g33960D	GSBRNA2G00146462001	chrA07:23203166-23205791	1193	11.7003	10.9697	8.90944	4.33298	0.547881	2.09407	3.58457	8.82912	10.0414	2.62096	0.300757
BnaA07g35260D	GSBRNA2G00146315001	chrA07:23762738-23764579	1205	4.58717	15.4413	5.51779	16.3875	31.4724	29.7988	3.81869	11.6066	34.8036	42.3318	14.0337
BnaA07g35790D	GSBRNA2G00146256001	chrA07:23955442-23956411	859	15.5474	25.0205	16.0707	29.8741	71.0832	51.5148	11.8465	25.8211	53.2448	52.5606	31.3299
BnaA07g35800D	GSBRNA2G00146254001	chrA07:23959932-23961219	822	9.32928	11.7169	8.90357	12.645	30.2964	32.2884	8.70663	14.0772	19.1022	30.9095	28.1554
BnaA07g36300D	GSBRNA2G00027975001	chrA07_random:266173-267738	1332	13.3226	13.9519	14.1874	22.743	51.7314	40.0361	6.69459	11.4547	20.6268	16.1307	6.90324
BnaA07g36770D	GSBRNA2G00003797001	chrA07_random:673038-673398	360	2.91611	75.023	68.3136	55.1124	142.805	145.18	58.9218	72.8449	75.6956	73.9869	159.651
BnaA07g37360D	GSBRNA2G00063601001	chrA07_random:1045960-1047188	1051	3.62674	6.51548	7.40812	11.472	30.4526	19.4261	3.52841	8.47045	17.2707	8.261	3.33454
BnaA07g38550D	GSBRNA2G00030463001	chrA07_random:1701486-1705439	2670	1.58839	2.8027	3.41776	4.0212	7.55544	3.05473	5.14412	3.34886	5.35609	5.29981	11.4552
BnaA07g38680D	GSBRNA2G00019711001	chrA07_random:1783659-1785134	894	25.4448	20.9413	20.8808	22.3078	12.1997	6.48572	17.0021	18.0384	23.603	12.0888	9.30328
BnaA07g38960D	GSBRNA2G00058706001	chrA07_random:1926534-1928496	1400	3.9247	5.26483	5.37674	5.63938	9.87717	12.0945	7.07547	6.52943	7.96631	9.76853	17.7467
BnaA08g00950D	GSBRNA2G00114126001	chrA08:645829-646769	667	0.684742	3.50565	3.11395	6.38286	13.3006	16.7707	2.76225	3.53736	9.22775	10.9545	15.9226
BnaA08g01590D	GSBRNA2G00114233001	chrA08:1316377-1317152	620	49.5764	67.2815	50.4229	61.1098	27.3702	13.8677	50.8265	69.3998	54.6993	29.5744	32.2675
BnaA08g01830D	GSBRNA2G00085759001	chrA08:1501864-1502698	834	4.19267	10.079	7.29361	12.8614	17.4688	19.7559	7.72491	13.4074	22.667	17.4884	7.72502
BnaA08g03150D	GSBRNA2G00091017001	chrA08:2569547-2571009	714	1.48332	70.2073	64.0472	59.6545	108.369	121.466	63.5079	72.9565	77.0488	50.31	138.661
BnaA08g03570D	GSBRNA2G00094938001	chrA08:2899574-2900108	534	3.05948	176.82	162.033	143.806	264.04	267.423	142.952	182.368	170.403	126.373	325.995
BnaA08g03920D	GSBRNA2G00094996001	chrA08:3231532-3233325	1574	3.60993	22.1636	22.1846	17.9113	21.2552	25.9368	19.8444	22.7205	24.0642	14.188	29.3913
BnaA08g04750D	GSBRNA2G00092029001	chrA08:4558016-4559917	1360	1.34365	72.8398	76.6201	72.9211	103.211	123.365	71.3632	78.5199	89.7497	59.374	143.196
BnaA08g07360D	GSBRNA2G00087630001	chrA08:7384877-7387112	1352	9.28328	16.1807	15.4903	21.8857	61.8257	24.8311	23.9074	19.7498	19.6505	33.2149	68.1429
BnaA08g08890D	GSBRNA2G00126934001	chrA08:8613718-8614952	770	2.31681	142.168	135.456	117.203	160.931	186.951	103.035	147.348	152.748	78.1552	187.987
BnaA08g09560D	GSBRNA2G00126852001	chrA08:9118332-9120819	1689	10.7098	36.1822	39.1928	34.3058	45.2127	54.2492	38.3891	42.7481	45.2289	30.0504	61.2775
BnaA08g09740D	GSBRNA2G00126832001	chrA08:9227088-9228305	1032	2.41032	2.20781	2.39565	1.75154	5.25934	12.4626	2.91144	2.07371	4.85576	3.85463	2.22526
BnaA08g10090D	GSBRNA2G00126784001	chrA08:9443131-9448772	1924	0.648748	1.19011	1.54403	1.16372	4.14108	0.545577	0.746959	0.687806	1.02114	1.0948	1.32863
BnaA08g11240D	GSBRNA2G00126638001	chrA08:10245004-10246474	1470	1.56887	4.8244	4.90531	4.08083	7.32996	10.0161	4.87517	4.85645	5.00517	3.67198	8.59494
BnaA08g11700D	GSBRNA2G00004537001	chrA08:10533745-10535728	1983	1.46609	88.4637	109.448	74.4963	149.42	161.949	100.681	98.5184	99.0575	73.4274	156.392
BnaA08g11740D	GSBRNA2G00004533001	chrA08:10557003-10558887	1493	5.8815	10.6758	9.94359	17.1234	22.1749	32.4253	8.89528	16.0924	21.067	18.9685	12.9764
BnaA08g13410D	GSBRNA2G00078774001	chrA08:11621550-11622840	862	2.15298	111.848	97.0432	91.7719	143.518	175.067	91.6154	108.663	116.409	72.2547	188.758
BnaA08g13650D	GSBRNA2G00078808001	chrA08:11784165-11786763	1642	8.31636	8.7096	10.2138	10.5854	16.7943	20.8204	12.8607	13.0673	12.0141	24.1531	30.0978
BnaA08g13860D	GSBRNA2G00078837001	chrA08:11899913-11900944	1031	0.771777	2.57468	1.31934	2.68552	11.5515	10.4002	0.492734	1.6997	6.97699	5.35626	7.72203
BnaA08g14970D	GSBRNA2G00027277001	chrA08:12541422-12542288	866	41.8481	58.2061	34.5234	39.9283	74.0683	119.798	97.969	44.1444	54.8576	28.1948	23.2915
BnaA08g15200D	GSBRNA2G00027241001	chrA08:12713114-12715750	1730	5.75781	6.09332	5.66439	7.87445	15.558	8.09616	5.21307	4.19465	6.48148	6.25152	15.6378
BnaA08g15350D	GSBRNA2G00027221001	chrA08:12787481-12789510	1656	43.5824	37.3996	36.2504	29.6105	15.8561	32.1719	32.8416	35.4343	32.2225	20.0625	3.16973
BnaA08g16370D	GSBRNA2G00150940001	chrA08:13358614-13365881	1431	22.5726	25.1734	20.5869	17.652	7.17901	16.4286	16.6141	19.1182	21.1286	10.8542	4.12466
BnaA08g16670D	GSBRNA2G00150900001	chrA08:13501183-13504036	1694	0.416485	18.2751	18.5985	14.8593	25.0357	32.1135	16.2837	17.0268	19.8897	11.3054	31.4196
BnaA08g16720D	GSBRNA2G00150895001	chrA08:13517878-13521291	3413	1.73911	20.1141	25.1606	20.2507	29.2044	32.8176	20.1888	22.4859	23.5449	15.9873	38.5916
BnaA08g17380D	GSBRNA2G00150814001	chrA08:13821918-13825861	2653	14.057	20.6974	17.2366	23.6837	52.4531	81.3643	22.9371	16.9118	35.5825	52.6561	90.1696
BnaA08g17420D	GSBRNA2G00150807001	chrA08:13878513-13880120	1257	16.7322	17.6872	18.3202	15.8388	6.17854	7.23895	13.4907	16.846	14.6639	9.29105	2.79419
BnaA08g17810D	GSBRNA2G00150759001	chrA08:14082834-14086062	2073	6.1811	7.5639	7.62118	9.1121	14.5355	15.0554	6.64784	8.08255	10.6288	14.5955	12.4119
BnaA08g18150D	GSBRNA2G00150715001	chrA08:14253893-14255121	819	2.19045	31.2517	38.1822	24.3426	66.7092	81.1904	33.9879	44.0513	35.6153	24.0345	60.483
BnaA08g18320D	GSBRNA2G00150687001	chrA08:14362176-14363947	1474	2.84901	26.9204	64.0011	22.8754	54.2172	107.876	27.228	48.7436	44.4192	13.2642	33.3995
BnaA08g18330D	GSBRNA2G00150685001	chrA08:14366607-14368376	1468	10.7432	423.318	378.021	361.602	693.155	830.645	363.286	399.432	433.442	351.352	909.023
BnaA08g18440D	GSBRNA2G00150668001	chrA08:14431065-14431401	336	13.5322	70.9043	76.7093	65.9502	145.71	162.496	77.5108	80.8632	84.9974	80.1697	157.687
BnaA08g19130D	GSBRNA2G00059979001	chrA08:14752756-14753110	354	3.96866	184.821	162.281	150.583	340.499	278.373	173.858	204.436	200.641	145.041	362.319
BnaA08g20630D	GSBRNA2G00073063001	chrA08:15497310-15498127	740	1.77306	25.7473	23.5443	21.891	23.6266	30.012	22.9011	28.8876	30.138	12.4781	32.8239
BnaA08g21940D	GSBRNA2G00102856001	chrA08:16103261-16104999	1350	0.537045	3.76237	2.29696	5.72315	6.44677	7.14972	2.0011	5.81707	11.675	8.85773	1.6206
BnaA08g22180D	GSBRNA2G00102887001	chrA08:16213646-16215236	1242	3.00713	5.47551	3.05943	5.39758	7.66904	11.6844	3.90627	4.5814	9.43165	4.8228	6.89404
BnaA08g22240D	GSBRNA2G00102894001	chrA08:16235750-16237373	1137	11.1948	11.8381	12.0161	15.6589	22.4046	27.8723	9.37359	13.8787	11.7905	19.528	4.07785
BnaA08g22690D	GSBRNA2G00102941001	chrA08:16403572-16404911	1066	5.62304	16.172	17.1051	21.0554	18.0528	24.0957	12.9962	22.3425	24.0686	11.0755	11.7916
BnaA08g22720D	GSBRNA2G00102946001	chrA08:16419594-16420357	763	5.62337	8.33876	12.8536	17.5431	43.4506	19.5933	8.30444	15.0194	20.469	20.1577	16.1172
BnaA08g23020D	GSBRNA2G00102983001	chrA08:16541254-16542040	786	2.01395	4.98404	4.41017	8.25492	14.7458	18.0835	5.87738	9.36607	13.6046	13.7353	19.5955
BnaA08g23120D	GSBRNA2G00102996001	chrA08:16576624-16580790	2846	1.01771	1.07635	1.22959	1.9435	4.25046	2.9482	0.763463	1.55615	7.78518	5.31154	2.55505
BnaA08g23150D	GSBRNA2G00103000001	chrA08:16596054-16597595	1066	10.2041	13.4324	12.0559	22.0579	34.934	30.7338	12.1937	19.5895	26.572	30.7101	29.4248
BnaA08g23970D	GSBRNA2G00103095001	chrA08:16932151-16934369	1784	2.04657	124.752	122.772	111.908	166.467	192.469	116.234	121.837	138.381	94.6276	221.992
BnaA08g24480D	GSBRNA2G00015250001	chrA08:17109532-17110906	1179	13.6485	14.243	16.7186	24.1085	41.223	52.0614	16.6157	24.2488	30.3678	35.862	31.3781
BnaA08g24680D	GSBRNA2G00015225001	chrA08:17178662-17181086	1803	2.82272	3.99846	3.96065	4.9905	12.1324	3.8906	3.93063	2.47782	4.39725	5.55636	12.217
BnaA08g25590D	GSBRNA2G00015114001	chrA08:17570282-17572839	1793	11.5183	9.04446	11.2956	8.43089	4.16476	9.13158	11.2533	9.47168	8.03905	6.52781	1.31728
BnaA08g25990D	GSBRNA2G00047121001	chrA08:17725865-17729944	2725	15.4748	16.8733	17.4202	18.4592	36.801	63.129	18.1585	15.1607	26.1979	42.4599	61.8749
BnaA08g26170D	GSBRNA2G00047142001	chrA08:17805468-17806975	1507	7.28616	10.1076	10.7115	8.81027	19.5611	7.7147	15.1681	6.91594	8.44644	9.82542	18.2705
BnaA08g26490D	GSBRNA2G00047180001	chrA08:17915643-17916153	510	23.6654	36.5451	36.179	40.3492	80.3922	28.393	19.7567	28.8195	32.6119	39.8122	68.4373
BnaA08g27230D	GSBRNA2G00089606001	chrA08:18216369-18218234	1568	11.0262	446.396	416.085	382.902	686.299	836.955	372.744	453.43	484.937	362.685	892.914
BnaA08g28140D	GSBRNA2G00089703001	chrA08:18554727-18560678	2420	3.28291	7.98942	8.05092	7.58982	8.1841	8.10262	7.6352	7.91896	8.76245	5.90583	11.1332
BnaA08g29220D	GSBRNA2G00017673001	chrA08_random:69466-72262	1967	1.75756	94.1503	104.565	86.9796	127.132	149.605	91.2132	108.239	112.757	73.1557	203.471
BnaA08g30600D	GSBRNA2G00033770001	chrA08_random:1606091-1607737	1198	8.06931	27.9988	26.6129	25.3143	27.2526	33.0181	26.0536	31.3677	29.7602	16.7681	33.3386
BnaA08g30830D	GSBRNA2G00051169001	chrA08_random:1721573-1722322	749	3.98635	130.744	94.5227	89.6559	204.831	213.456	95.3238	125.788	109.617	96.7933	229.969
BnaA08g31700D	GSBRNA2G00039635001	chrA08_random:2093610-2098425	3007	0.143033	5.3351	6.3747	5.26323	7.20948	8.58495	6.09313	6.26013	7.19919	3.66946	10.5571
BnaA09g00750D	GSBRNA2G00018422001	chrA09:476937-477869	772	11.4563	224.202	223.054	204.844	259.002	271.791	193.425	243.688	287.336	140.997	341.168
BnaA09g01040D	GSBRNA2G00018460001	chrA09:589448-590787	746	92.9257	114.652	84.8767	83.7788	37.6514	33.5579	118.585	135.885	86.7603	62.3965	67.6048
BnaA09g02340D	GSBRNA2G00009850001	chrA09:1191116-1191977	861	3.85246	156.841	131.146	123.303	262.605	276.547	132.725	155.482	159.655	128.158	308.325
BnaA09g02760D	GSBRNA2G00009793001	chrA09:1408219-1411015	1848	8.72676	115.987	109.206	101.141	144.687	181.742	101.144	109.621	118.79	82.4604	182.577
BnaA09g03100D	GSBRNA2G00009745001	chrA09:1577193-1578733	1113	2.99858	5.89068	5.67779	7.39872	10.2237	14.9634	5.23705	6.57853	8.8567	9.53873	13.1205
BnaA09g04150D	GSBRNA2G00009508001	chrA09:2070698-2071427	654	2.46742	141.199	112.389	102.242	203.457	217.08	115.702	142.19	137.428	92.7852	220.063
BnaA09g04200D	GSBRNA2G00009514001	chrA09:2085449-2085686	237	18.4283	390.528	525.631	318.515	706.043	702.887	379.229	413.529	431.68	264.86	807.391
BnaA09g04230D	GSBRNA2G00009517001	chrA09:2092283-2092529	246	63.3631	2026.02	1782.19	1597.1	3521.77	3790.65	1622.1	1936.04	1928.5	1405.52	3900.68
BnaA09g04280D	GSBRNA2G00009522001	chrA09:2110500-2112608	1272	1.26651	2.96292	7.5342	3.64743	9.16074	0.895184	2.3322	1.17755	3.59263	1.7743	3.74208
BnaA09g04320D	GSBRNA2G00009527001	chrA09:2126785-2128337	898	27.8495	16.1909	25.3383	19.8219	9.69972	25.9511	17.4637	17.598	30.5916	20.1203	1.81041
BnaA09g04420D	GSBRNA2G00009537001	chrA09:2157886-2160103	1088	1.31549	1.22944	0.278507	4.60563	4.99951	7.51494	3.09689	6.61303	0.90306	4.87405	8.10454
BnaA09g04970D	GSBRNA2G00009608001	chrA09:2446828-2448987	1996	1.09819	18.9766	16.8675	15.7954	17.1735	18.4147	15.8284	17.0139	19.2127	9.8655	25.0023
BnaA09g05080D	GSBRNA2G00094763001	chrA09:2500905-2502092	1067	6.17202	8.6981	4.49304	6.91803	12.9707	18.3662	4.34481	5.56755	6.45671	12.8099	17.9148
BnaA09g07140D	GSBRNA2G00005758001	chrA09:3488168-3488744	576	25.959	39.8816	32.732	54.8524	101.772	110.396	30.9965	52.8458	60.2663	91.3431	84.5633
BnaA09g08470D	GSBRNA2G00063713001	chrA09:4182304-4184997	1698	1.88067	5.49998	8.23564	5.99436	10.1136	1.05571	4.69834	2.78851	2.76848	3.00292	5.25654
BnaA09g08810D	GSBRNA2G00087525001	chrA09:4393514-4396241	1774	5.65132	5.38886	6.08139	8.6732	20.3503	14.2513	5.01141	5.64747	9.81514	9.58309	18.1454
BnaA09g09160D	GSBRNA2G00045045001	chrA09:4567441-4569663	1411	0.88962	30.0417	28.9373	26.8944	46.6972	56.0848	30.0596	32.5047	28.9265	25.974	57.4326
BnaA09g10050D	GSBRNA2G00091622001	chrA09:5089031-5092048	1218	89.6262	81.7165	51.1694	48.8871	13.3537	46.9596	55.5027	59.4411	81.9579	43.5097	3.72777
BnaA09g10210D	GSBRNA2G00068566001	chrA09:5224630-5229616	3076	1.19746	4.65827	6.14879	5.2082	6.0387	8.74998	5.49393	5.69217	5.88661	4.93738	8.96331
BnaA09g11080D	GSBRNA2G00056416001	chrA09:5704449-5711109	3502	1.23626	5.64772	7.83938	6.34752	7.99819	10.5404	6.43231	6.76292	7.08061	5.40044	13.488
BnaA09g12650D	GSBRNA2G00081872001	chrA09:6705020-6706778	1366	10.819	11.3663	8.86979	4.87357	2.48318	3.42595	7.71118	11.1074	9.9919	2.98871	0.422979
BnaA09g13300D	GSBRNA2G00070630001	chrA09:7342299-7344144	1178	34.6471	12.518	8.64118	11.2282	9.95975	7.39594	13.3556	10.225	7.78144	12.7721	5.21231
BnaA09g13680D	GSBRNA2G00070573001	chrA09:7785550-7786049	499	5.57278	387.012	243.518	304.732	402.128	420.162	189.264	236.957	282.484	145.107	385.369
BnaA09g13690D	GSBRNA2G00070572001	chrA09:7788430-7788670	240	86.8413	4864.21	3293.38	4128.1	6405.64	6415.24	3405.02	4349.69	4258.83	2701.33	6914.52
BnaA09g14940D	GSBRNA2G00068766001	chrA09:8657963-8659223	1260	0.932146	46.0679	50.9835	37.2074	71.4223	83.7933	50.1573	43.7162	49.5452	31.4996	83.474
BnaA09g15080D	GSBRNA2G00068788001	chrA09:8749023-8750514	1491	5.40532	8.11809	8.39629	8.66225	20.7736	8.79414	3.91059	2.73867	6.41009	6.23384	12.1826
BnaA09g15090D	GSBRNA2G00068790001	chrA09:8762531-8764022	1491	23.9136	32.247	32.8838	37.301	66.0213	31.9199	17.779	15.8724	25.8389	29.7105	42.8761
BnaA09g16990D	GSBRNA2G00070967001	chrA09:10258600-10264456	3171	25.6244	21.6447	21.8572	19.7213	8.67627	17.3841	17.4571	17.1444	20.553	13.7863	2.37245
BnaA09g17090D	GSBRNA2G00070955001	chrA09:10317934-10319873	1692	38.6666	82.489	83.6609	76.5334	101.919	116.42	79.7479	84.6964	88.9624	77.0212	127.295
BnaA09g18340D	GSBRNA2G00072371001	chrA09:11423248-11428344	1351	2.12251	27.4695	23.2883	20.8067	37.3065	42.1624	22.4333	25.0685	27.991	19.5017	40.3524
BnaA09g18500D	GSBRNA2G00072389001	chrA09:11485092-11486357	1170	8.93257	21.2211	14.9607	29.7821	40.703	42.6856	10.7185	24.8857	34.4512	33.5566	19.9685
BnaA09g19110D	GSBRNA2G00117797001	chrA09:12016068-12017988	1591	0.819884	46.8181	57.2429	43.3669	76.8199	95.1861	45.6916	50.3253	55.2615	36.2744	98.8794
BnaA09g19780D	GSBRNA2G00083812001	chrA09:12785402-12787621	1192	0.647443	10.8498	9.63692	8.3778	8.94178	11.0853	7.97036	9.95925	11.452	4.59769	11.6117
BnaA09g20060D	GSBRNA2G00094460001	chrA09:13034824-13039431	3318	9.4855	8.28028	10.2298	8.38965	3.57142	6.16967	9.582	6.47515	8.28173	6.17265	2.21432
BnaA09g20070D	GSBRNA2G00094461001	chrA09:13041542-13043724	2182	7.54004	5.91053	5.48315	4.75893	2.3578	4.08173	4.52336	5.65267	5.47586	2.91725	2.67426
BnaA09g21860D	GSBRNA2G00145532001	chrA09:14487656-14489745	1813	3.48069	8.88832	5.81459	12.4105	10.2997	10.5387	4.51548	6.86654	15.3088	17.3452	4.70732
BnaA09g22670D	GSBRNA2G00145648001	chrA09:15260099-15262124	1653	12.248	26.3725	27.1028	24.0785	31.1386	35.4341	26.8252	28.803	28.3488	20.1843	33.3913
BnaA09g24630D	GSBRNA2G00061312001	chrA09:17370755-17375284	3072	2.4335	4.10887	5.14931	4.22017	4.74659	7.26026	4.77543	4.68929	4.77496	4.0699	4.97627
BnaA09g25690D	GSBRNA2G00113808001	chrA09:18767405-18770428	1905	6.67162	7.6318	6.42148	8.2169	14.3773	21.8793	6.23744	7.54945	10.0015	16.715	19.2384
BnaA09g25760D	GSBRNA2G00113797001	chrA09:18834853-18837367	1776	1.89242	1.32569	1.43266	2.20821	1.33733	6.58347	3.37688	2.64881	2.40449	1.95128	2.52981
BnaA09g26030D	GSBRNA2G00113751001	chrA09:19155700-19157869	1548	5.02126	5.57225	5.80879	7.8239	17.0165	12.7198	5.82247	7.0267	8.33849	8.94485	4.91621
BnaA09g26470D	GSBRNA2G00034985001	chrA09:19652384-19654403	1200	95.4128	76.0938	72.5906	61.4749	25.8899	44.2589	54.3278	69.2561	70.0622	45.0685	6.31137
BnaA09g27390D	GSBRNA2G00085889001	chrA09:20547079-20549222	1165	1.36705	2.33819	7.51404	3.1617	13.5783	1.42302	1.18896	1.02077	1.96324	3.59117	9.25186
BnaA09g28190D	GSBRNA2G00038326001	chrA09:21076799-21077159	360	4.57881	238.358	186.748	180.998	416.977	347.272	182.205	240.744	230.143	170.835	454.69
BnaA09g29520D	GSBRNA2G00090674001	chrA09:22102586-22106808	1989	2.59825	9.01119	6.91941	16.3771	25.2675	34.8086	6.29897	13.8634	26.8713	21.359	22.5986
BnaA09g30050D	GSBRNA2G00015812001	chrA09:22386310-22388574	1753	11.3998	8.17753	8.30973	5.5339	4.05607	5.20526	5.16283	9.55031	8.93824	6.85738	1.20115
BnaA09g30080D	GSBRNA2G00015807001	chrA09:22409312-22409996	601	17.7368	36.0984	32.3784	32.6645	43.4675	55.8908	29.347	36.7755	38.3667	33.9531	44.3522
BnaA09g30300D	GSBRNA2G00015773001	chrA09:22552852-22555239	2322	3.73516	5.86625	6.28717	6.72931	13.4448	25.6519	6.26039	6.06759	13.4864	14.8484	25.9628
BnaA09g30760D	GSBRNA2G00015707001	chrA09:22904350-22906200	1513	3.17092	6.77848	5.94239	7.02466	11.9041	15.6405	6.39148	8.0181	8.98362	16.2113	12.1639
BnaA09g30800D	GSBRNA2G00015702001	chrA09:22922675-22925506	1587	17.3772	40.9632	41.1367	36.9864	53.9909	64.6802	42.2595	43.4776	44.2895	38.8689	57.8192
BnaA09g30920D	GSBRNA2G00079623001	chrA09:23032871-23034105	1234	18.5682	33.8576	29.2196	46.3159	47.6321	50.0877	25.0422	46.7788	45.4831	43.7196	20.7632
BnaA09g30960D	GSBRNA2G00079618001	chrA09:23044678-23047811	2344	0.205141	12.852	16.1803	12.2012	21.5705	22.7702	14.3432	13.5163	15.7249	11.7914	24.3338
BnaA09g31110D	GSBRNA2G00079595001	chrA09:23146383-23149318	1251	4.89142	14.7138	13.6158	14.9279	23.9623	25.5106	12.5834	14.4738	13.6292	14.2245	27.4279
BnaA09g33600D	GSBRNA2G00129470001	chrA09:24759456-24761438	1500	23.6141	18.3204	17.3198	10.7427	7.37243	12.1271	12.3817	16.1652	14.7436	8.95055	0.703946
BnaA09g34540D	GSBRNA2G00129594001	chrA09:25288909-25290286	1221	0.525185	8.16301	9.54405	7.71294	10.9797	13.9403	9.20204	8.75721	11.2287	5.25834	15.0024
BnaA09g34580D	GSBRNA2G00129599001	chrA09:25318216-25322898	2497	0.758244	45.1801	44.3205	40.1943	63.2634	75.8125	41.1087	43.5812	49.7096	35.7453	89.1139
BnaA09g35010D	GSBRNA2G00069369001	chrA09:25573570-25575595	1353	6.23901	8.94962	9.7477	11.5085	17.7249	12.1921	8.1324	8.48821	11.9328	7.9049	9.50145
BnaA09g35450D	GSBRNA2G00037133001	chrA09:25846823-25849074	1441	3.80503	4.72344	4.9007	4.73969	12.4797	15.856	4.98219	4.28125	5.85108	15.1162	22.9157
BnaA09g36180D	GSBRNA2G00037052001	chrA09:26247545-26248525	980	4.52587	11.3518	8.73208	20.7486	24.5913	18.9542	8.45737	16.576	26.3761	17.9989	8.65841
BnaA09g36730D	GSBRNA2G00121982001	chrA09:26505366-26511709	3230	7.44778	7.86671	7.22087	8.53614	11.1989	24.4993	8.2475	6.47777	12.1265	13.4756	28.1542
BnaA09g36820D	GSBRNA2G00121972001	chrA09:26589702-26592855	2072	6.48865	9.46603	9.68059	16.9357	20.7481	21.2879	9.88643	15.4946	21.8578	25.0904	11.4685
BnaA09g37510D	GSBRNA2G00121876001	chrA09:26976173-26977760	830	2.97975	157.791	131.154	132.927	197.958	199.225	112.107	150.701	158.546	91.5906	223.542
BnaA09g38900D	GSBRNA2G00006771001	chrA09:27684599-27685913	1314	3.13524	3.71102	3.91339	6.5043	11.3729	4.92299	3.98057	3.35307	6.32643	5.57082	5.76343
BnaA09g39720D	GSBRNA2G00049471001	chrA09:28106988-28109066	1911	5.59187	128.817	177.615	80.6215	155.626	298.855	64.6935	128.595	142.883	45.7448	88.106
BnaA09g39990D	GSBRNA2G00049499001	chrA09:28193670-28194009	339	3.39739	78.9833	77.8847	68.7902	120.656	133.52	72.3286	91.5975	90.0534	58.8008	163.275
BnaA09g40020D	GSBRNA2G00049502001	chrA09:28207712-28209428	1716	3.0373	13.457	15.422	12.0513	23.9756	23.0292	13.9548	14.3255	13.3712	12.8317	27.2856
BnaA09g41420D	GSBRNA2G00057320001	chrA09:28945071-28948675	2761	0.967266	55.6354	60.9288	48.1565	65.519	86.4634	53.5176	61.2215	64.7218	37.3297	94.7452
BnaA09g41600D	GSBRNA2G00057338001	chrA09:29038955-29041932	1287	4.4515	12.2228	14.85	10.7804	17.2401	15.6607	15.978	13.4459	13.5381	8.89711	20.1702
BnaA09g41810D	GSBRNA2G00057367001	chrA09:29137230-29138857	1169	9.9622	19.2884	17.3953	27.4959	54.4282	45.848	14.9195	23.6657	17.421	58.1561	74.1955
BnaA09g42610D	GSBRNA2G00078192001	chrA09:29661130-29661809	679	31.2749	32.7349	41.761	44.8944	92.2949	70.0824	26.4957	35.5448	44.8069	78.5802	64.3046
BnaA09g43130D	GSBRNA2G00078252001	chrA09:29951486-29954002	1459	4.29025	6.82741	5.85043	9.3075	23.1639	26.1526	6.48871	9.85517	13.8636	20.2205	30.3974
BnaA09g43560D	GSBRNA2G00078301001	chrA09:30140713-30141462	749	3.26771	5.19558	4.55464	9.08916	33.1733	9.33939	23.0507	9.54576	17.9811	28.0648	85.9511
BnaA09g43940D	GSBRNA2G00078344001	chrA09:30284900-30288190	2011	2.70846	36.5219	39.214	33.0078	48.0734	52.3645	34.938	39.4909	44.5782	26.6426	63.4326
BnaA09g44300D	GSBRNA2G00016167001	chrA09:30445132-30449304	1751	9.12306	14.0443	13.5993	17.7663	17.0389	27.174	12.3546	17.846	23.2231	21.7976	9.68936
BnaA09g45930D	GSBRNA2G00055207001	chrA09:31302568-31304884	1650	0.381558	41.9618	40.9181	38.032	36.0459	42.5521	36.153	42.147	50.7274	19.2587	47.3012
BnaA09g47100D	GSBRNA2G00035434001	chrA09:31788784-31790531	1264	6.92947	23.8285	23.2701	21.143	30.1481	35.7517	23.3914	26.2682	29.2899	21.7975	40.1369
BnaA09g47460D	GSBRNA2G00057374001	chrA09:31990455-31992915	1646	2.67732	24.5298	30.281	23.8999	38.0425	36.63	31.78	30.1077	30.4526	20.7826	43.832
BnaA09g47550D	GSBRNA2G00057385001	chrA09:32017248-32018865	1617	0.844589	14.4138	26.4729	8.78674	43.3649	72.2298	20.9396	19.675	13.27	9.16753	18.2706
BnaA09g47690D	GSBRNA2G00057403001	chrA09:32114726-32115889	1071	0.581238	30.5774	30.0377	28.6706	38.2929	45.9864	26.319	31.2545	34.2373	20.386	53.9564
BnaA09g47760D	GSBRNA2G00057413001	chrA09:32145667-32146174	507	6.87733	464.834	456.47	439.213	534.824	568.811	378.223	492.71	596.957	261.643	692.782
BnaA09g47910D	GSBRNA2G00057428001	chrA09:32213360-32215235	1875	1.01959	2.09326	1.73263	2.41733	2.58117	4.27147	2.0904	2.362	3.37824	4.82	2.57941
BnaA09g48680D	GSBRNA2G00122265001	chrA09:32556031-32560306	2060	7.87154	10.2657	10.0529	10.7708	16.4874	23.8708	8.37803	9.12764	12.9829	21.4858	20.4522
BnaA09g51020D	GSBRNA2G00052472001	chrA09:33632579-33635046	1829	0.49921	29.2972	30.768	25.4691	42.4853	52.0755	29.8576	29.1531	31.3519	22.792	53.066
BnaA09g51200D	GSBRNA2G00052451001	chrA09:33699139-33701639	1443	6.54033	10.1655	11.4346	12.697	11.3925	16.0102	11.8248	10.3229	9.95928	8.57396	16.2173
BnaA09g51230D	GSBRNA2G00052446001	chrA09:33709989-33712753	2549	13.3012	17.1253	17.6904	22.1514	27.8842	47.2432	18.3073	20.6484	28.4517	29.8444	25.0082
BnaA09g51620D	GSBRNA2G00027751001	chrA09_random:17482-20191	1586	5.26623	7.66242	5.13223	8.16121	22.4238	29.7543	6.34174	5.54829	12.0239	17.765	54.7121
BnaA09g52510D	GSBRNA2G00014592001	chrA09_random:480882-484646	2032	13.5998	9.54346	8.06123	6.68514	2.88876	5.23881	4.83494	7.68148	9.86496	3.15973	0.626641
BnaA09g52790D	GSBRNA2G00010581001	chrA09_random:639156-641875	1641	9.32629	17.2052	20.853	15.906	25.5331	4.83924	14.3786	9.24606	8.672	11.3398	14.2192
BnaA09g53450D	GSBRNA2G00069136001	chrA09_random:1228048-1230529	1968	0.253645	1.96258	1.61091	1.5012	2.2271	3.89464	1.62217	1.77571	1.91235	1.15897	2.65374
BnaA09g54980D	GSBRNA2G00012014001	chrA09_random:2969519-2971426	1540	0.802162	2.96292	2.5765	5.15634	10.8394	26.3814	2.96345	3.95622	9.19133	12.4536	15.9373
BnaA09g56100D	GSBRNA2G00027526001	chrA09_random:3566111-3569984	3341	4.5879	5.14768	4.22725	3.69874	0.988758	2.04654	4.82549	5.30243	5.3971	1.45061	0.560827
BnaA10g00230D	GSBRNA2G00150563001	chrA10:143341-144786	914	0.633583	27.6983	24.8491	20.7357	38.6529	46.8471	23.2782	27.653	28.9006	19.9251	48.2824
BnaA10g00370D	GSBRNA2G00150548001	chrA10:186506-189247	1820	4.13219	4.79516	4.79328	6.74181	13.6579	8.42044	4.59009	5.0653	5.27869	6.71295	13.9612
BnaA10g00580D	GSBRNA2G00150525001	chrA10:293367-294087	720	1.44773	65.427	71.3929	55.3727	108.169	133.446	65.3126	77.7006	74.0361	56.7549	153.663
BnaA10g01190D	GSBRNA2G00150452001	chrA10:626754-631886	3795	48.3527	42.976	43.1779	37.1861	12.9778	19.3822	34.904	42.8715	40.5902	14.5188	3.9387
BnaA10g01390D	GSBRNA2G00150427001	chrA10:738266-740715	1715	2.76962	157.804	136.354	133.714	154.912	201.742	126.888	152.86	162.015	87.3464	207.785
BnaA10g02600D	GSBRNA2G00150277001	chrA10:1376456-1382886	3157	0.145924	9.00364	11.0601	7.28884	12.9514	14.8365	9.53273	10.7605	10.7247	6.80383	16.2382
BnaA10g02860D	GSBRNA2G00150246001	chrA10:1480358-1483999	3200	0.841632	4.83185	5.86563	4.47455	5.38882	6.86275	4.34015	5.06825	5.93871	3.18949	6.9786
BnaA10g03800D	GSBRNA2G00087071001	chrA10:2024085-2027174	2523	0.81425	45.1775	51.3974	39.897	70.6378	79.2718	44.2677	49.5889	49.5035	37.1009	91.5801
BnaA10g03960D	GSBRNA2G00087972001	chrA10:2101911-2106870	2910	0.622292	15.5598	16.5482	13.7822	20.3081	22.5588	13.9862	16.1377	17.5899	10.8368	24.5195
BnaA10g04370D	GSBRNA2G00122822001	chrA10:2298603-2301709	1227	4.15209	25.4873	29.9142	26.541	29.0445	28.9987	26.0959	28.0874	35.8662	13.2558	36.8788
BnaA10g05260D	GSBRNA2G00122954001	chrA10:3001257-3005403	2121	2.59124	15.0952	16.0616	13.6835	18.0172	18.8516	12.4405	15.354	15.4403	10.4236	22.7655
BnaA10g05640D	GSBRNA2G00064675001	chrA10:3437742-3438667	794	2.83358	183.097	163.817	156.42	191.352	207.499	146.386	177.7	201.811	103.646	244.77
BnaA10g05950D	GSBRNA2G00120948001	chrA10:4165809-4167704	1267	0.455834	28.4651	34.3834	30.2237	34.6588	42.7535	27.0722	29.6452	31.5827	17.7383	48.7434
BnaA10g06640D	GSBRNA2G00079037001	chrA10:5094398-5095787	1268	1.97787	20.3395	18.0305	14.3596	29.781	35.8733	21.3588	22.0295	20.7957	15.8735	33.6457
BnaA10g07190D	GSBRNA2G00078951001	chrA10:5649901-5650722	701	1.9114	96.9572	99.3196	79.8362	139.825	162.641	88.8726	101.595	105.063	70.802	181.543
BnaA10g07250D	GSBRNA2G00078941001	chrA10:5712330-5716555	1297	11.3945	19.2545	15.5893	19.3175	46.9353	13.7986	12.0732	8.13185	13.5891	16.324	50.964
BnaA10g07320D	GSBRNA2G00078934001	chrA10:5757866-5759416	1015	17.2672	30.4976	25.9244	19.75	32.2785	43.7622	24.0427	30.0846	28.1336	21.5538	34.6055
BnaA10g07360D	GSBRNA2G00078929001	chrA10:5778527-5784681	4052	6.51394	6.00887	5.48697	4.38924	2.33109	2.57828	3.08237	4.73722	4.91289	3.22622	1.30291
BnaA10g07620D	GSBRNA2G00110234001	chrA10:6103807-6104729	922	3.85177	7.14929	6.80286	10.3027	27.6203	64.3796	10.9815	12.3754	29.4663	31.0376	58.4936
BnaA10g07760D	GSBRNA2G00110212001	chrA10:6296761-6299266	2505	3.03503	3.99615	4.31101	4.22105	9.49765	3.35331	4.02497	2.66938	3.43399	4.39671	7.98807
BnaA10g08320D	GSBRNA2G00074879001	chrA10:7104707-7106141	1434	15.0732	28.2886	26.6092	42.3433	78.475	65.8464	28.2689	44.2786	40.4334	78.9283	79.3153
BnaA10g09490D	GSBRNA2G00095409001	chrA10:8349566-8353664	1433	15.8345	16.9962	12.5457	14.8077	2.39138	3.65249	14.0901	20.0568	11.5568	5.8151	2.08429
BnaA10g10580D	GSBRNA2G00052859001	chrA10:9009955-9011787	1441	5.89621	19.5771	19.2447	18.643	19.8067	22.7631	17.2221	19.5206	19.1944	13.2412	20.6703
BnaA10g10880D	GSBRNA2G00052820001	chrA10:9212153-9214941	1386	2.00754	24.5194	29.6117	25.0438	39.3205	42.0721	27.1643	26.3688	27.923	21.4228	48.5133
BnaA10g11500D	GSBRNA2G00093711001	chrA10:9656812-9657931	1038	2.35829	9.64801	6.50396	11.3239	20.2335	46.7609	6.02488	8.53692	33.4411	23.7158	27.3751
BnaA10g11710D	GSBRNA2G00003072001	chrA10:9827180-9829042	1329	1.66378	6.94224	7.08028	5.92907	8.69148	8.77842	5.78568	6.37538	7.57981	4.99969	8.40589
BnaA10g12720D	GSBRNA2G00093306001	chrA10:10384807-10386850	1815	16.4614	18.7887	20.6809	23.1164	44.3246	42.9825	21.8856	21.5852	23.1087	50.4949	57.0225
BnaA10g12780D	GSBRNA2G00047920001	chrA10:10438074-10438619	545	8.95982	15.6437	14.5025	25.1749	38.9554	35.743	13.3298	26.999	21.773	38.8168	24.8451
BnaA10g12840D	GSBRNA2G00047914001	chrA10:10454277-10455058	705	31.5734	33.4121	40.0718	40.018	77.8079	29.5771	28.9028	36.3239	44.27	35.9255	42.4427
BnaA10g12960D	GSBRNA2G00047897001	chrA10:10544363-10547372	1218	9.16582	8.34571	10.2673	12.2444	25.5945	20.4293	9.95868	11.6238	10.9265	28.2816	48.0162
BnaA10g14100D	GSBRNA2G00154122001	chrA10:11276562-11277546	984	0.915806	7.7631	5.65536	13.5298	20.8483	41.1237	5.65478	13.1873	23.5069	18.8324	18.7036
BnaA10g14750D	GSBRNA2G00154203001	chrA10:11669419-11670193	774	4.1897	7.75571	10.6676	8.00496	16.1175	4.95654	6.80524	5.81087	9.32879	10.7612	21.2336
BnaA10g15570D	GSBRNA2G00154297001	chrA10:12053350-12055831	2010	7.82992	329.291	332.229	238.339	508.92	611.712	277.043	334.735	350.217	258.954	582.34
BnaA10g15660D	GSBRNA2G00154309001	chrA10:12088301-12089723	817	1.03991	39.2785	35.5391	35.6737	51.9513	54.2763	28.3718	40.3033	44.7697	27.0735	62.5337
BnaA10g17590D	GSBRNA2G00135378001	chrA10:12965926-12972031	3557	4.41097	5.17517	4.90757	5.86146	14.0832	21.0179	5.44307	5.15482	10.0644	13.8272	21.8887
BnaA10g18690D	GSBRNA2G00135519001	chrA10:13479064-13480323	478	31.9351	36.6245	36.7293	47.8626	77.4044	118.83	32.6525	42.4512	55.7141	98.7393	71.2252
BnaA10g18990D	GSBRNA2G00135556001	chrA10:13639478-13641483	1697	0.803825	10.1837	19.7461	9.15244	18.388	28.9189	10.717	16.9184	14.1321	8.0956	16.7409
BnaA10g19340D	GSBRNA2G00135598001	chrA10:13778376-13779105	729	1.40045	16.6706	37.4968	12.4893	51.3905	75.7214	24.8102	41.8277	24.5437	13.0554	34.4381
BnaA10g19670D	GSBRNA2G00135635001	chrA10:13887776-13889137	1286	14.4682	28.2138	31.1076	26.4965	69.6887	17.0259	10.5647	7.56764	10.399	15.7181	30.1909
BnaA10g20620D	GSBRNA2G00135745001	chrA10:14361103-14364245	2517	0.991541	37.1203	40.3377	35.3786	51.1633	61.8841	36.3312	40.0549	42.8012	29.0314	68.8342
BnaA10g20920D	GSBRNA2G00135781001	chrA10:14484785-14486561	1249	5.53182	6.85531	6.50769	8.41944	13.7283	15.4926	7.01157	7.76112	10.4963	12.3915	15.3752
BnaA10g22680D	GSBRNA2G00135993001	chrA10:15220363-15221445	917	10.5701	17.2032	8.73332	17.7906	19.7373	29.602	10.0965	14.5268	20.1239	19.0546	15.9642
BnaA10g23320D	GSBRNA2G00136073001	chrA10:15433841-15435720	980	9.38886	10.25	12.4769	11.9514	24.6273	8.32517	13.989	12.0048	12.7322	13.2106	16.8068
BnaA10g23500D	GSBRNA2G00136092001	chrA10:15521446-15523745	1604	22.7962	17.4205	28.3679	34.9713	67.1925	24.6658	30.4576	24.4881	39.9705	36.0094	60.0065
BnaA10g23540D	GSBRNA2G00136099001	chrA10:15535553-15536876	1323	0.513209	2.9068	1.56558	3.57467	7.12851	6.69132	0.835328	4.76766	10.1021	4.37327	1.83346
BnaA10g23820D	GSBRNA2G00136131001	chrA10:15668015-15669789	1206	36.2579	39.7261	39.5694	54.5394	120.292	116.577	39.9811	44.6913	55.4129	99.497	171.996
BnaA10g23860D	GSBRNA2G00136135001	chrA10:15680728-15682706	1442	2.66668	26.0783	72.8101	17.8445	81.1768	149.299	30.1068	35.4504	25.0364	16.5672	51.9097
BnaA10g23870D	GSBRNA2G00136136001	chrA10:15683922-15685873	1399	5.43187	73.4271	193.72	61.2737	225.144	427.903	92.4708	122.711	101.147	42.4741	91.7291
BnaA10g23880D	GSBRNA2G00136137001	chrA10:15687854-15689806	1489	10.6676	136.319	124.011	113.708	170.259	197.88	111.745	142.292	146.332	99.3876	229.016
BnaA10g25000D	GSBRNA2G00136263001	chrA10:16202092-16203647	1346	6.19202	7.45298	6.59732	10.3531	16.0023	17.2043	7.82465	8.66349	9.85926	10.2991	13.0943
BnaA10g25120D	GSBRNA2G00136280001	chrA10:16236346-16237773	1059	9.78066	15.2649	17.5964	17.5567	39.878	13.0747	6.97987	7.7085	8.20878	10.9487	22.0381
BnaA10g25430D	GSBRNA2G00136315001	chrA10:16359236-16362401	2535	62.0048	41.8337	48.7713	36.0837	19.3409	15.9547	38.5082	44.7819	28.7467	49.4892	11.484
BnaA10g25720D	GSBRNA2G00136352001	chrA10:16498409-16502047	2524	4.72073	10.1329	11.3979	8.81711	10.5014	13.7987	9.68754	10.5317	10.0569	8.58636	12.6587
BnaA10g26020D	GSBRNA2G00136391001	chrA10:16659270-16660991	1149	1.65564	106.045	96.0681	87.531	153.979	181.299	87.7992	108.895	110.07	80.3025	202.728
BnaA10g29660D	GSBRNA2G00096006001	chrA10_random:1856429-1858119	1690	10.3941	26.3494	30.3297	25.8925	35.1802	42.7148	28.8734	28.7143	31.2482	26.4415	43.8872
BnaAnng01300D	GSBRNA2G00119675001	chrAnn_random:792696-794589	1027	951.565	719.076	567.481	326.03	52.697	170.895	254.84	576	695.844	85.9095	2.8858
BnaAnng01320D	GSBRNA2G00119678001	chrAnn_random:808196-809979	1332	0.640904	2.16028	2.00488	5.97751	13.2961	25.5126	2.02983	5.41906	9.20273	9.69138	9.88101
BnaAnng03040D	GSBRNA2G00006014001	chrAnn_random:2447363-2450653	1796	1.60311	6.73114	8.09192	6.45058	8.10175	8.08874	7.50489	7.93306	8.37186	4.82724	8.38466
BnaAnng03110D	GSBRNA2G00006022001	chrAnn_random:2479088-2480144	1056	1.18725	57.8537	56.9748	52.7344	77.7989	89.8101	56.7434	63.6765	64.6752	40.5463	100.552
BnaAnng03120D	GSBRNA2G00006023001	chrAnn_random:2481793-2483609	1669	0.683867	16.4164	15.7526	14.3706	16.8124	20.1297	14.7016	18.4108	18.5151	9.78726	23.2371
BnaAnng03830D	GSBRNA2G00045893001	chrAnn_random:3911476-3912435	959	4.93298	7.59734	9.60811	12.5346	13.5099	22.9029	10.7039	14.8111	17.6915	12.7897	14.1478
BnaAnng04790D	GSBRNA2G00064760001	chrAnn_random:5434670-5435120	450	15.8036	29.973	26.1465	38.9185	74.4832	97.6626	24.708	46.2669	56.8974	61.9134	63.2656
BnaAnng07270D	GSBRNA2G00076684001	chrAnn_random:7144690-7148827	3258	0.926933	3.53153	3.69454	3.02557	5.25221	7.84229	3.67986	3.46792	5.70108	4.23035	6.74486
BnaAnng07690D	GSBRNA2G00077251001	chrAnn_random:7427276-7429367	1093	0.955374	71.5152	74.1379	66.867	79.384	96.3566	66.3232	79.0668	83.7342	43.5083	108.877
BnaAnng08350D	GSBRNA2G00086654001	chrAnn_random:8935212-8937883	1515	5.09795	8.47635	4.35289	7.98383	21.4589	33.7476	4.25215	5.5482	14.5293	18.5713	41.3161
BnaAnng08580D	GSBRNA2G00086893001	chrAnn_random:9056399-9059481	1657	0.368849	26.3224	28.8181	25.7837	31.1444	37.6756	25.6231	28.8572	32.7923	17.5492	45.1676
BnaAnng08970D	GSBRNA2G00087557001	chrAnn_random:9548820-9549645	651	121.4	101.085	97.1974	90.1708	42.9322	55.5174	70.6295	96.6487	105.753	49.2379	21.956
BnaAnng09500D	GSBRNA2G00088436001	chrAnn_random:10010549-10011457	650	22.8067	55.2476	23.3421	56.1777	149.057	176.025	20.2871	36.9152	73.0333	106.106	151.988
BnaAnng10520D	GSBRNA2G00097429001	chrAnn_random:11460953-11463020	1596	0.80887	4.30467	5.06433	4.03907	5.89604	5.5931	4.32879	4.41293	5.5257	3.13136	5.16838
BnaAnng10550D	GSBRNA2G00097432001	chrAnn_random:11467979-11469049	994	1.73365	97.579	102.808	100.604	127.993	149.637	95.5327	106.439	123.892	69.754	170.811
BnaAnng10720D	GSBRNA2G00097453001	chrAnn_random:11535724-11538895	2423	10.6563	7.99055	8.68523	6.94858	3.68861	4.99024	8.64094	8.85472	7.65421	5.27649	2.08459
BnaAnng11370D	GSBRNA2G00005168001	chrAnn_random:12327596-12329902	823	2.83054	203.843	178.077	167.041	234.359	241.837	149.86	195.934	213.676	113.739	277.074
BnaAnng11580D	GSBRNA2G00007444001	chrAnn_random:12538994-12541173	1740	28.5713	54.8741	46.3236	43.3496	48.9114	88.4623	41.8932	49.7305	64.0443	60.5617	41.5782
BnaAnng12170D	GSBRNA2G00008748001	chrAnn_random:13184824-13189220	2916	0.447188	20.7463	26.9871	19.0798	30.5483	38.4626	21.5366	24.8262	22.0978	17.3943	43.8065
BnaAnng12200D	GSBRNA2G00008753001	chrAnn_random:13197917-13200091	1782	1.06976	64.5861	64.3486	56.3483	82.4855	88.7346	54.9219	63.3066	68.3833	43.0587	113.931
BnaAnng13040D	GSBRNA2G00013964001	chrAnn_random:14023985-14025010	821	13.9159	20.7482	7.37494	7.77317	32.824	50.468	4.73495	3.01583	8.1735	12.6379	19.9281
BnaAnng13710D	GSBRNA2G00016475001	chrAnn_random:14645653-14647511	1491	3.69061	189.586	167.993	151.824	309.578	335.63	166.173	193.335	184.953	163.761	409.643
BnaAnng14710D	GSBRNA2G00022399001	chrAnn_random:15775907-15777000	1093	16.2042	22.8037	16.0505	32.5049	46.2717	48.2685	8.53366	13.0829	29.2525	47.7784	35.226
BnaAnng17740D	GSBRNA2G00034354001	chrAnn_random:18721674-18729506	3228	4.52142	9.17414	14.2512	7.56631	17.3468	27.7773	8.59463	10.6893	8.08833	6.46077	10.5224
BnaAnng17910D	GSBRNA2G00034514001	chrAnn_random:18849865-18850848	702	41.1654	96.7744	22.5284	48.8201	180.646	303.111	31.5143	19.5682	66.8811	122.358	385.772
BnaAnng17960D	GSBRNA2G00034550001	chrAnn_random:18867356-18871014	3237	0.727528	2.4994	3.79584	2.99797	3.73242	5.08608	2.66685	2.98908	2.87585	2.33454	4.45186
BnaAnng19370D	GSBRNA2G00041259001	chrAnn_random:20952150-20953388	1152	1.76532	4.09737	2.37983	3.72775	9.34527	11.8471	2.2917	3.46117	4.46816	10.957	14.9819
BnaAnng20550D	GSBRNA2G00046647001	chrAnn_random:22606183-22608620	1298	1.96581	3.19281	3.20306	3.31967	9.72061	6.0887	3.00973	3.17847	4.26751	2.60392	1.78063
BnaAnng20740D	GSBRNA2G00046898001	chrAnn_random:22912676-22913131	455	21.1689	34.6391	41.3902	57.6506	102.564	104.178	39.7707	55.7373	68.6354	68.4486	114.356
BnaAnng21170D	GSBRNA2G00050923001	chrAnn_random:23550039-23552691	2085	0.982205	60.6976	59.075	54.4703	90.9037	113.665	57.597	60.094	60.8556	51.4142	144.258
BnaAnng21760D	GSBRNA2G00052216001	chrAnn_random:24185721-24188357	1647	10.9033	15.0239	3.54253	55.679	58.3985	93.1558	32.5266	57.4362	15.0792	51.062	92.8869
BnaAnng22680D	GSBRNA2G00055532001	chrAnn_random:25500169-25503459	1761	0.567214	2.72765	3.74258	2.59572	2.66563	3.98676	2.85966	3.21138	3.77541	1.8624	4.08631
BnaAnng24430D	GSBRNA2G00064342001	chrAnn_random:28281560-28284540	1108	6.74316	3.08974	4.71466	1.56528	0.934387	0.684357	3.37601	3.10445	2.03058	2.03547	0
BnaAnng24780D	GSBRNA2G00065186001	chrAnn_random:28652830-28655114	1716	1.88089	88.7345	95.2983	77.54	123.728	155.046	85.1619	81.579	101.295	71.7268	183.061
BnaAnng25230D	GSBRNA2G00066886001	chrAnn_random:29253826-29255946	1806	0.520252	32.9521	37.327	29.6287	48.8911	59.436	32.691	33.5833	34.0034	27.1721	60.3306
BnaAnng25560D	GSBRNA2G00067672001	chrAnn_random:29605147-29607181	1490	9.76771	11.4736	9.01489	8.51085	3.13464	3.49028	10.7213	10.5079	8.60703	4.36129	3.87631
BnaAnng27090D	GSBRNA2G00073550001	chrAnn_random:31013163-31013767	604	45.2823	40.5845	33.0403	31.5461	14.7398	19.9046	32.0246	38.9993	31.5622	18.9874	2.38433
BnaAnng27200D	GSBRNA2G00074181001	chrAnn_random:31132743-31133980	1237	3.38444	8.49878	7.76471	7.33727	9.60905	10.5438	5.57918	5.06695	11.5543	10.8135	5.71003
BnaAnng28400D	GSBRNA2G00079842001	chrAnn_random:32449232-32452545	2879	0.378503	10.4528	13.6684	7.05498	19.6208	30.2981	9.77931	12.3146	11.2368	8.26862	17.2986
BnaAnng29030D	GSBRNA2G00081968001	chrAnn_random:33214618-33215637	879	37.7409	62.7357	37.3978	67.9957	199.026	136.995	27.9992	56.2763	90.0722	109.129	214.73
BnaAnng29470D	GSBRNA2G00083506001	chrAnn_random:33725266-33726375	954	4.22183	5.66111	4.93598	7.03656	14.6931	4.89026	6.03405	4.7663	5.03159	7.9664	17.3028
BnaAnng29590D	GSBRNA2G00083867001	chrAnn_random:33798587-33800320	1127	7.92062	7.71608	8.7644	11.4087	21.163	21.5281	8.86805	13.2457	12.5829	23.5781	22.834
BnaAnng31270D	GSBRNA2G00091795001	chrAnn_random:35771541-35773640	1910	2.65669	6.22843	6.14131	6.06175	5.35759	7.56142	5.43332	6.374	6.54964	5.13589	6.63585
BnaAnng31630D	GSBRNA2G00092809001	chrAnn_random:36218513-36220929	1890	7.85977	7.59254	7.11812	5.19343	0.773234	1.45136	5.56886	7.03694	6.83309	1.22772	0.112841
BnaAnng31850D	GSBRNA2G00093336001	chrAnn_random:36425122-36427929	1464	0.838596	45.5329	46.3373	42.4558	65.1978	78.4615	44.1295	45.7596	52.9817	36.6299	82.0014
BnaAnng31880D	GSBRNA2G00093341001	chrAnn_random:36440984-36442424	1293	2.21736	13.6757	16.0705	11.1917	20.3135	23.0478	14.8187	13.7876	16.7005	10.7406	22.3304
BnaAnng32290D	GSBRNA2G00094256001	chrAnn_random:36906612-36907964	1167	3.97724	2.98261	5.11239	3.77298	6.18429	13.0549	3.49011	4.33306	6.13693	7.58173	13.3451
BnaAnng32610D	GSBRNA2G00096312001	chrAnn_random:37214973-37217602	1102	1.78371	2.23994	1.75258	4.4569	10.8178	8.83038	1.47013	2.86316	7.61702	8.28613	7.85574
BnaAnng32690D	GSBRNA2G00096589001	chrAnn_random:37363825-37365833	1047	7.20394	9.09304	8.52689	13.2462	23.6668	11.4178	10.3655	16.4001	17.9095	20.075	21.559
BnaAnng33440D	GSBRNA2G00098228001	chrAnn_random:38122166-38123202	778	69.6557	116.069	136.13	153.11	315.021	100.148	113.193	94.066	103.572	154.575	355.988
BnaAnng34650D	GSBRNA2G00005321001	chrAnn_random:39413765-39415784	1208	5.31617	9.51939	10.7802	10.9639	16.7429	15.9729	8.86236	10.3496	10.9944	9.58553	17.3686
BnaAnng35410D	GSBRNA2G00008166001	chrAnn_random:40135194-40136341	694	1.42181	164.286	153.744	151.622	151.274	164.227	59.3781	60.0598	66.0512	81.8206	209.57
BnaAnng36730D	GSBRNA2G00013694001	chrAnn_random:41694432-41696063	920	5.11613	4.74724	2.59987	25.2532	48.4615	75.4564	20.2826	49.7199	7.56465	37.2263	73.2534
BnaAnng37080D	GSBRNA2G00014359001	chrAnn_random:42025653-42027183	1066	13.9113	26.3553	22.4845	19.0584	58.4761	20.0601	20.109	12.8701	17.4704	19.909	53.8501
BnaAnng37270D	GSBRNA2G00014569001	chrAnn_random:42243549-42244305	756	5.77272	8.98953	19.7884	11.4641	39.0695	5.55134	5.2036	3.74481	8.9858	7.07475	18.9596
BnaAnng40320D	GSBRNA2G00025663001	chrAnn_random:46022866-46024392	1081	9.60529	7.30606	8.20295	7.93295	17.381	24.8422	8.86527	7.06519	8.75845	9.9224	19.4852
BnaC01g00200D	GSBRNA2G00075114001	chrC01:61976-64152	2043	0.233961	14.2737	18.4495	14.2285	20.5571	24.9321	14.7284	16.375	16.3516	12.5853	29.4192
BnaC01g02870D	GSBRNA2G00130956001	chrC01:1511473-1523983	7923	1.78762	5.48314	5.63312	5.21111	5.93462	7.03201	5.39646	5.32325	6.88419	3.81824	7.34601
BnaC01g02960D	GSBRNA2G00130944001	chrC01:1544537-1545293	756	1.78973	81.1754	107.944	104.069	69.7653	142.103	101.109	93.946	109.22	57.2233	202.624
BnaC01g03410D	GSBRNA2G00130897001	chrC01:1759947-1761661	1216	53.9569	48.897	45.0803	40.9779	14.8703	20.6974	45.7899	40.4698	51.0181	17.4725	14.3594
BnaC01g03500D	GSBRNA2G00130886001	chrC01:1811440-1815719	2829	2.19364	54.1731	60.5937	51.2877	71.2502	82.6566	56.7916	62.3499	71.9971	43.1351	97.4751
BnaC01g04350D	GSBRNA2G00130773001	chrC01:2275873-2278006	1959	1.72121	100.229	120.263	85.1711	149.064	159.404	103.741	115.543	113.382	77.9852	165.928
BnaC01g04460D	GSBRNA2G00130760001	chrC01:2355371-2361388	1736	25.2638	32.9399	29.8617	36.62	67.9382	33.9904	25.7519	20.1617	28.7011	34.0488	60.1521
BnaC01g04860D	GSBRNA2G00130715001	chrC01:2519610-2523491	2314	3.58009	8.84547	7.26936	9.06417	8.89519	8.96023	10.5357	7.45806	13.6638	17.6022	4.39134
BnaC01g07220D	GSBRNA2G00130425001	chrC01:3747123-3749622	1215	5.34136	13.3375	12.7103	9.07148	14.1626	17.422	10.127	13.122	11.9883	9.138	17.8567
BnaC01g07540D	GSBRNA2G00130380001	chrC01:3948709-3950523	1156	2.36476	7.90251	11.3201	8.56036	13.599	15.4793	12.3385	11.4351	12.1429	9.08001	15.9609
BnaC01g08130D	GSBRNA2G00130296001	chrC01:4310574-4311915	1133	15.4091	12.2367	8.71508	9.52337	2.63267	8.18709	9.7833	7.02635	16.0871	4.57812	0.561803
BnaC01g09700D	GSBRNA2G00123151001	chrC01:5683763-5686252	1238	12.9403	14.8945	15.3964	21.4361	41.1712	24.3455	13.9806	15.5044	13.4651	18.7215	24.1102
BnaC01g11000D	GSBRNA2G00107791001	chrC01:6789782-6790301	519	3.79607	219.581	195.346	171.167	294.919	328.407	183.627	219.404	226.32	140.605	341.167
BnaC01g11030D	GSBRNA2G00107786001	chrC01:6877408-6879116	1589	1.22774	3.20816	4.29761	3.42255	4.21217	6.79898	3.73484	3.17685	3.76821	3.18363	5.33627
BnaC01g11140D	GSBRNA2G00107772001	chrC01:6928622-6930098	1407	10.581	31.8297	34.7818	27.9912	45.9981	51.473	30.7175	34.7643	33.7643	27.9763	58.843
BnaC01g11450D	GSBRNA2G00107732001	chrC01:7089966-7092777	1864	7.17924	8.43198	7.88006	9.51621	15.8799	24.8494	8.54334	9.05237	14.0203	15.8385	18.6197
BnaC01g11610D	GSBRNA2G00107711001	chrC01:7269389-7270910	992	17.1542	22.2826	14.8637	18.559	45.0072	58.7701	12.8916	18.5133	23.3461	41.2363	62.9691
BnaC01g12360D	GSBRNA2G00138114001	chrC01:7831974-7834255	1173	36.9835	137.461	129.145	119.161	164.85	164.52	114.872	134.237	137.893	107.635	202.133
BnaC01g12370D	GSBRNA2G00138115001	chrC01:7840626-7842121	1495	8.37137	13.3012	13.695	13.4411	24.1763	26.2262	12.6477	14.0437	16.9985	17.7267	28.3516
BnaC01g13480D	GSBRNA2G00138275001	chrC01:8805327-8806398	1071	19.3904	15.1812	16.9575	12.1433	3.95289	5.27846	12.1439	17.4965	12.2986	6.62194	1.06893
BnaC01g13940D	GSBRNA2G00138339001	chrC01:9071985-9072396	411	59.4332	81.993	90.2833	116.868	219.293	79.5585	88.0859	82.6438	64.0847	72.2546	87.038
BnaC01g15640D	GSBRNA2G00116202001	chrC01:10738096-10739377	1108	0.718449	6.17888	1.50661	4.42923	6.56829	6.71777	1.02564	2.3176	6.96115	7.93489	1.25499
BnaC01g16430D	GSBRNA2G00116091001	chrC01:11270970-11271918	948	3.13483	3.76066	3.90874	7.27016	12.8698	13.7995	5.08939	7.11486	8.55637	10.9429	11.0618
BnaC01g16500D	GSBRNA2G00116083001	chrC01:11313530-11314792	884	11.3081	501.163	459.544	387.197	672.365	833.602	429.071	512.392	516.985	273.822	704.258
BnaC01g17020D	GSBRNA2G00116014001	chrC01:11667277-11669523	1167	100.776	125.143	83.0507	84.3161	25.1241	51.3509	69.7099	126.197	67.415	19.3323	63.2597
BnaC01g17060D	GSBRNA2G00116010001	chrC01:11677579-11679172	1226	2.43065	11.0644	11.6368	10.9816	12.7282	17.371	10.5355	14.4205	15.3443	8.83323	15.3113
BnaC01g17710D	GSBRNA2G00157553001	chrC01:12160414-12161790	1005	41.6111	73.4314	64.9098	95.5134	183.357	246.237	39.9189	67.7798	101.416	175.343	186.337
BnaC01g17820D	GSBRNA2G00157538001	chrC01:12247230-12251456	1142	1.13483	33.7705	47.7838	24.7402	62.4795	94.3651	35.2198	40.2445	34.762	21.8407	54.268
BnaC01g19520D	GSBRNA2G00042255001	chrC01:13501793-13503644	1096	13.9467	30.29	29.3818	26.5745	36.9903	47.6698	25.4255	29.739	28.3828	24.6696	44.366
BnaC01g19800D	GSBRNA2G00069849001	chrC01:13754977-13756966	1989	11.2173	18.4244	21.8175	18.8093	22.6913	26.0382	19.6115	22.2213	20.8344	17.9912	26.5882
BnaC01g20450D	GSBRNA2G00006277001	chrC01:14284156-14285767	1247	0.496111	25.219	26.2482	21.9102	42.6268	49.3914	25.6618	25.0797	25.1453	23.9758	57.889
BnaC01g20780D	GSBRNA2G00006228001	chrC01:14510075-14511913	1229	13.4508	15.7302	19.2027	16.9656	34.1693	11.4845	13.5858	14.9045	17.3852	15.8793	31.3772
BnaC01g20890D	GSBRNA2G00006211001	chrC01:14587436-14588861	1149	12.7783	11.9617	9.83022	6.03491	2.07079	3.87993	3.94875	9.9361	8.57088	4.50521	1.64299
BnaC01g24660D	GSBRNA2G00125763001	chrC01:19795400-19796947	1326	2.47522	6.49412	4.23197	6.72493	6.05085	8.76005	4.29769	4.67979	10.1546	9.249	3.67943
BnaC01g27440D	GSBRNA2G00050459001	chrC01:25064446-25065708	1182	19.8907	21.5025	23.5825	26.9809	46.4164	56.3743	21.1009	26.0747	28.3088	45.3994	59.0586
BnaC01g27710D	GSBRNA2G00086320001	chrC01:25347034-25348589	1350	1.35144	55.0399	57.7734	45.2614	95.5549	112.572	61.4527	56.4862	58.849	49.1786	109.816
BnaC01g29540D	GSBRNA2G00117293001	chrC01:27908007-27908235	228	10.1636	453.367	354.638	334.565	551.835	607.211	401.613	404.767	476.842	232.664	765.529
BnaC01g29960D	GSBRNA2G00029427001	chrC01:28368543-28370450	1552	0.761203	47.247	43.4853	40.6463	49.6825	56.2539	37.685	43.9745	49.3206	27.4633	69.7093
BnaC01g30750D	GSBRNA2G00001133001	chrC01:29225672-29226558	886	23.4262	21.8986	21.356	19.6288	7.87123	9.78849	18.1761	22.6095	20.5511	10.0096	9.0773
BnaC01g32200D	GSBRNA2G00038218001	chrC01:31336085-31342280	3510	1.07028	4.10935	4.94161	3.6554	4.76855	8.54972	4.58489	4.29716	5.64517	2.94832	6.95173
BnaC01g32590D	GSBRNA2G00095866001	chrC01:31841911-31843983	1358	3.51961	5.17342	2.93946	5.02124	11.2421	1.85274	4.6974	3.17013	4.94627	5.37878	9.33004
BnaC01g33660D	GSBRNA2G00101250001	chrC01:32860482-32863240	2076	0.484191	22.7431	27.8754	17.6171	31.3226	33.7363	22.8536	26.0886	22.5125	16.3407	29.7498
BnaC01g33860D	GSBRNA2G00101294001	chrC01:33064622-33067890	2128	1.57566	76.5618	80.0893	66.7285	127.413	144.056	73.155	80.1408	85.412	64.7901	169.695
BnaC01g36720D	GSBRNA2G00051878001	chrC01:35924261-35927605	2360	1.34754	2.50906	2.00948	2.67319	7.5902	13.1369	2.42506	2.20661	5.66057	7.21902	14.5117
BnaC01g37680D	GSBRNA2G00026279001	chrC01:36968831-36971523	1965	6.70844	340.037	300.453	286.409	466.133	488.111	287.011	332.451	372.424	242.581	589.841
BnaC01g37690D	GSBRNA2G00026282001	chrC01:36983193-36985284	1750	0.359332	3.20094	6.15624	3.21331	9.36779	13.8245	4.50287	5.88902	3.21195	2.69916	4.69065
BnaC01g38800D	GSBRNA2G00018647001	chrC01:37700123-37701047	666	23.663	21.0595	17.0775	12.8598	5.554	7.05519	23.0785	32.0209	21.8233	4.67344	2.1132
BnaC01g39610D	GSBRNA2G00018531001	chrC01:38241332-38243163	1485	5.62162	25.2934	79.117	20.7242	78.2284	177.085	39.6484	34.9848	26.8129	20.0241	59.3215
BnaC01g40400D	GSBRNA2G00044486001	chrC01:38711818-38713213	1127	11.5702	14.6707	11.2218	11.5752	4.09226	2.88121	12.4219	14.0905	11.6218	5.93236	4.98512
BnaC01g42990D	GSBRNA2G00028379001	chrC01_random:2306274-2309997	1787	17.5137	10.774	12.6065	11.5395	6.70756	8.19416	11.4099	15.4769	12.737	10.7366	4.68689
BnaC01g44940D	GSBRNA2G00064375001	chrC01_random:4423307-4425395	1668	1.94073	4.12541	4.37252	3.52267	5.73431	6.75101	5.98838	6.32336	6.7111	3.46637	5.88268
BnaC02g00130D	GSBRNA2G00069041001	chrC02:33252-35278	1434	9.64666	2.59366	1.34849	2.67457	1.28989	1.15967	4.93904	2.50618	1.05998	5.79129	1.90332
BnaC02g00740D	GSBRNA2G00080823001	chrC02:307719-309703	1134	40.3323	48.1391	35.724	32.7271	23.2417	14.7979	50.1695	45.0701	37.8219	25.654	28.6152
BnaC02g01620D	GSBRNA2G00078573001	chrC02:659607-661469	1461	2.69475	164.697	168.989	137.933	248.222	282.991	155.058	188.577	189.114	125.6	355.183
BnaC02g04170D	GSBRNA2G00151985001	chrC02:2121743-2125617	2903	0.615395	24.0583	28.4108	23.6297	38.2381	42.5553	25.0053	26.2507	28.5216	20.5286	48.0716
BnaC02g04560D	GSBRNA2G00151930001	chrC02:2419659-2421380	1189	9.37742	14.6127	11.4154	17.8797	29.7579	32.7462	13.7843	15.7597	25.1867	28.5086	42.8953
BnaC02g05070D	GSBRNA2G00151868001	chrC02:2648397-2649984	1320	14.3102	24.5809	23.0778	24.2805	52.8306	18.6896	13.8308	9.21698	11.8446	17.4731	37.7329
BnaC02g06390D	GSBRNA2G00065417001	chrC02:3417337-3419373	1584	0.46207	24.1529	39.2936	38.7168	21.5554	42.2592	37.657	35.0178	43.4529	18.4736	79.7412
BnaC02g06930D	GSBRNA2G00065347001	chrC02:3698435-3703165	2763	0.595679	0.963641	0.872031	0.874357	2.58539	5.19197	0.848032	0.930683	1.97143	3.34129	5.45574
BnaC02g08380D	GSBRNA2G00114719001	chrC02:4555546-4558437	1706	0.36341	22.3905	22.316	20.5579	24.15	26.8721	19.7945	22.8857	24.9484	12.8396	30.6963
BnaC02g08600D	GSBRNA2G00114674001	chrC02:4790984-4792201	1134	14.631	14.2015	15.9788	19.1889	4.40453	10.5395	20.1939	17.2487	25.7616	6.05074	2.91584
BnaC02g09390D	GSBRNA2G00059074001	chrC02:5168957-5169874	917	1.23091	3.80954	2.18303	9.65912	7.22081	10.9646	3.48035	7.59381	15.3396	7.56405	3.10145
BnaC02g09510D	GSBRNA2G00059090001	chrC02:5248885-5250152	789	37.0222	42.9241	48.0366	72.5477	159.64	64.7542	104.22	59.9394	78.1458	100.891	263.091
BnaC02g10060D	GSBRNA2G00115099001	chrC02:5726266-5727222	956	6.51257	8.66875	9.61844	9.58786	25.9515	7.1041	11.7402	16.6474	7.30628	15.3721	28.3695
BnaC02g11010D	GSBRNA2G00114961001	chrC02:6390677-6393782	2392	0.724113	45.541	48.1446	38.2756	62.2697	70.0598	46.4848	49.7365	53.0115	33.4299	77.9047
BnaC02g12030D	GSBRNA2G00053102001	chrC02:7422997-7427787	2616	5.9149	56.3218	57.8994	52.7386	71.7007	85.5983	51.7982	58.6873	64.9352	43.9097	103.496
BnaC02g12100D	GSBRNA2G00073693001	chrC02:7599033-7602242	1129	0.454456	3.10029	4.35579	3.04705	4.38168	6.46247	2.45331	3.42004	4.23349	1.42053	3.89134
BnaC02g12730D	GSBRNA2G00122669001	chrC02:8102753-8105962	2446	4.08655	62.6349	63.9365	50.6267	80.553	92.1009	59.6294	58.8977	63.3601	45.3874	96.6945
BnaC02g13820D	GSBRNA2G00073646001	chrC02:9142507-9146099	1848	3.10748	37.6205	38.4081	32.7716	51.7487	59.7568	35.4942	38.9327	43.3145	28.1167	70.0295
BnaC02g14450D	GSBRNA2G00102296001	chrC02:9883452-9884071	520	3.07884	24.3337	27.4647	17.927	49.3303	50.0885	30.999	20.5785	25.1101	17.4181	43.9715
BnaC02g15950D	GSBRNA2G00152962001	chrC02:11600160-11603654	2703	0.755972	1.0446	3.94006	2.73714	3.99856	0.458322	0.814114	1.3945	2.14868	1.57662	2.39907
BnaC02g16640D	GSBRNA2G00076869001	chrC02:12212652-12213803	962	16.148	22.832	22.123	22.9787	29.008	46.8939	21.9952	27.2235	30.8151	28.0307	28.0729
BnaC02g17750D	GSBRNA2G00135080001	chrC02:13362886-13364063	1177	0.912703	43.6253	41.0249	36.3347	59.1434	61.0393	37.5444	45.7404	48.6216	31.6026	70.5662
BnaC02g18150D	GSBRNA2G00135152001	chrC02:13930342-13932671	1716	6.67822	7.2645	8.52106	10.9183	13.8401	17.4259	7.94892	9.53025	12.0984	14.9078	13.3439
BnaC02g22250D	GSBRNA2G00137084001	chrC02:19100902-19101865	864	7.31362	33.9874	36.1936	72.0764	108.306	162.604	32.4062	59.2576	85.0786	95.2674	89.9397
BnaC02g26030D	GSBRNA2G00018765001	chrC02:23284720-23287093	1194	0.996305	7.61353	3.59136	5.26301	15.7266	19.3765	2.12018	8.50692	18.4515	14.7338	1.55159
BnaC02g27050D	GSBRNA2G00152544001	chrC02:25001443-25004211	1713	17.4714	22.1939	19.9114	23.1389	51.8676	64.602	14.6286	18.8779	28.7769	49.0595	82.7523
BnaC02g28140D	GSBRNA2G00113116001	chrC02:26444382-26445280	825	2.1404	141.683	123.967	130.884	172.904	188.534	102.583	128.211	143.04	96.0554	220.272
BnaC02g31870D	GSBRNA2G00146835001	chrC02:34279328-34282508	2094	0.41937	2.67827	3.47888	2.65997	3.12784	4.16716	3.57378	3.41701	3.53766	2.53715	5.01668
BnaC02g31900D	GSBRNA2G00146830001	chrC02:34338309-34339960	866	2.21616	159.815	129.131	127.286	196.923	204.078	114.147	151.363	156.834	86.1981	223.196
BnaC02g32000D	GSBRNA2G00146817001	chrC02:34417373-34420090	1201	11.0976	12.5601	12.1911	14.6394	31.3688	15.7552	11.8414	10.5111	10.35	14.8005	19.248
BnaC02g33330D	GSBRNA2G00069886001	chrC02:35808713-35811283	1514	13.2407	29.9792	28.2572	26.2556	31.5518	43.5602	28.317	30.451	33.5115	22.0877	39.8426
BnaC02g34540D	GSBRNA2G00090171001	chrC02:37121418-37124000	1397	1.14234	2.46983	2.20291	3.13077	6.86841	5.62995	1.80148	1.72856	4.60945	5.85755	9.31373
BnaC02g34750D	GSBRNA2G00073359001	chrC02:37391216-37393552	1605	1.18948	43.1068	45.1122	42.5894	66.6051	76.8621	43.0023	48.6864	54.8287	37.6885	87.5605
BnaC02g34840D	GSBRNA2G00073348001	chrC02:37456416-37460343	1981	6.05053	12.1218	13.3501	12.2093	20.2328	25.0741	13.1942	15.0826	15.3509	16.1432	24.9184
BnaC02g35530D	GSBRNA2G00108427001	chrC02:38245450-38250737	3741	1.12141	2.34083	0.970303	1.589	1.90746	3.59572	1.36026	1.2592	3.0393	3.65915	1.09782
BnaC02g36110D	GSBRNA2G00108289001	chrC02:39194921-39196047	600	72.8708	104.701	24.1757	392.336	364.574	577.119	180.33	338.712	106.455	343.771	645.665
BnaC02g36770D	GSBRNA2G00040382001	chrC02:39788769-39790625	993	2.96827	8.61982	6.58078	11.8314	34.1538	60.8952	8.67431	11.5786	23.0725	34.5166	46.6703
BnaC02g37260D	GSBRNA2G00117563001	chrC02:40191560-40193786	1374	3.68186	3.71115	4.41905	5.0972	10.1105	12.0759	3.0832	3.69675	5.13658	12.289	16.6682
BnaC02g38360D	GSBRNA2G00120717001	chrC02:41340976-41342766	1533	5.94136	35.1081	112.857	27.3372	169.563	295.806	56.3768	52.3253	33.3749	27.9714	81.8484
BnaC02g38460D	GSBRNA2G00120696001	chrC02:41454600-41456647	1216	7.17471	10.5309	7.09627	10.5212	12.8643	20.653	11.7646	7.933	13.6481	4.13289	3.84239
BnaC02g38520D	GSBRNA2G00120687001	chrC02:41481579-41484424	2489	5.89259	13.0399	6.67274	10.2027	14.2058	15.5694	6.76877	8.08703	14.8364	13.0483	5.62072
BnaC02g39030D	GSBRNA2G00120614001	chrC02:42022703-42028747	2717	3.49222	1.81527	1.40671	3.05993	0.506251	0.518282	2.40476	1.86933	1.80229	1.07405	0.869168
BnaC02g39100D	GSBRNA2G00120598001	chrC02:42115793-42118378	2223	9.32643	8.19975	8.39941	7.52572	2.81487	4.86028	4.30064	6.35611	11.2203	4.39564	2.49349
BnaC02g39350D	GSBRNA2G00120565001	chrC02:42281995-42284945	2565	0.266543	17.0845	19.1985	15.5076	20.8582	28.8512	16.9505	18.6234	20.715	12.8405	30.4004
BnaC02g39630D	GSBRNA2G00028880001	chrC02:42505853-42510267	2327	3.04655	6.73386	7.92036	8.03587	7.57883	9.76395	7.464	6.77868	8.14286	5.00054	9.86325
BnaC02g41520D	GSBRNA2G00079776001	chrC02:44381594-44384530	1602	11.6916	13.3069	12.5993	18.7935	36.2397	15.6007	13.9387	11.8058	13.7471	18.2848	31.0785
BnaC02g42100D	GSBRNA2G00086539001	chrC02:44873792-44875533	952	3.59704	6.70361	4.89339	7.91889	12.7519	20.3367	7.5385	5.53466	9.61214	13.5676	24.115
BnaC02g42230D	GSBRNA2G00082682001	chrC02:44912864-44915189	1909	0.543627	31.3333	30.0665	23.938	53.7523	57.7517	29.1743	30.5024	28.4652	26.6877	63.3189
BnaC02g43000D	GSBRNA2G00086221001	chrC02:45418873-45419570	697	45.466	60.7577	69.7517	95.063	139.498	116.838	49.573	84.8574	88.1093	136.76	106.325
BnaC02g43880D	GSBRNA2G00055780001	chrC02:45990312-45993085	1887	0.652657	10.7071	9.84321	8.74595	16.0228	21.202	9.45965	11.1692	10.5747	10.3193	21.8803
BnaC02g44910D	GSBRNA2G00016586001	chrC02_random:703214-707021	2433	0.46571	21.4677	20.1301	19.1051	32.1489	39.8771	21.7376	24.4278	24.866	16.8579	44.9786
BnaC02g45000D	GSBRNA2G00028146001	chrC02_random:819383-820702	961	9.76682	12.1357	17.8637	18.1081	39.1469	11.4443	13.7947	4.852	4.73862	8.06306	8.75941
BnaC02g47880D	GSBRNA2G00044096001	chrC02_random:3985651-3988687	1515	0.362274	3.86578	3.34969	7.18205	29.4612	50.0076	4.16456	7.98064	15.7059	29.6786	45.849
BnaC02g47960D	GSBRNA2G00007829001	chrC02_random:4073097-4075518	1441	1.42425	74.7051	64.0018	67.6859	98.6672	104.94	62.8867	71.6742	81.9275	48.5801	116.969
BnaC02g48560D	GSBRNA2G00014798001	chrC02_random:4849280-4851685	1423	43.1316	59.7757	49.6378	66.9111	130.635	67.9573	79.6334	55.2318	66.6511	90.4717	190.9
BnaC02g48610D	GSBRNA2G00014805001	chrC02_random:4865612-4867355	1387	1.99904	8.51299	11.8201	8.67932	9.49358	16.2115	5.47651	7.32353	6.98746	4.07958	8.36592
BnaC02g48820D	GSBRNA2G00039577001	chrC02_random:5025593-5026724	1131	8.84823	13.3014	10.9659	13.7469	19.162	25.4053	5.86896	11.0743	19.6444	23.8667	25.7684
BnaC03g01430D	GSBRNA2G00134289001	chrC03:663491-665442	1227	32.8616	25.3248	23.446	12.2215	5.23104	8.09209	7.94602	17.8505	21.2526	3.30382	0
BnaC03g03040D	GSBRNA2G00134487001	chrC03:1481727-1483588	1331	0.45596	40.1073	31.8719	30.1191	49.9597	56.8163	35.6056	40.346	46.4008	25.9495	59.5939
BnaC03g03510D	GSBRNA2G00134543001	chrC03:1712806-1713415	609	24.5029	9.8064	10.3839	12.6362	1.85298	2.38205	4.65224	10.2479	12.2636	2.49404	0.742802
BnaC03g03520D	GSBRNA2G00134544001	chrC03:1714808-1717419	1528	9.47734	10.2687	7.70849	7.78652	2.40197	3.53598	7.01549	8.71844	9.13755	3.54497	6.10605
BnaC03g06120D	GSBRNA2G00140359001	chrC03:2968009-2969560	1253	19.7576	24.2149	25.6397	23.2944	61.2475	22.5885	10.9473	11.902	13.3366	16.5411	34.6532
BnaC03g06470D	GSBRNA2G00140403001	chrC03:3114002-3114431	429	5.48778	351.411	379.353	274.23	760.357	641.364	304.031	424.164	375.483	341.778	824.631
BnaC03g06740D	GSBRNA2G00140434001	chrC03:3225420-3227665	1801	0.830413	18.2782	27.54	12.4838	40.3445	63.1115	21.4924	23.4171	22.219	12.3237	37.2002
BnaC03g06790D	GSBRNA2G00140439001	chrC03:3239798-3241618	1194	1.24512	16.452	31.3325	12.7649	46.5469	77.172	20.5609	19.4158	14.5722	13.5997	33.5939
BnaC03g06930D	GSBRNA2G00140453001	chrC03:3309427-3310828	1401	0.488193	6.73568	7.31719	5.99562	7.86759	9.41646	5.69189	7.07841	7.34003	3.42445	8.31753
BnaC03g06960D	GSBRNA2G00140456001	chrC03:3315513-3318860	2412	6.44845	17.178	20.8055	17.377	18.324	24.465	17.7945	17.7956	20.6398	13.4462	24.412
BnaC03g08040D	GSBRNA2G00140587001	chrC03:3796613-3798689	1101	8.47887	12.4582	10.4483	12.7185	15.8428	28.0366	11.1181	11.7539	16.5865	19.5144	25.9667
BnaC03g09740D	GSBRNA2G00140791001	chrC03:4686940-4689410	1687	12.0198	44.6936	44.1222	40.4952	67.0331	78.8702	42.5204	46.2686	47.2587	41.225	88.1855
BnaC03g11570D	GSBRNA2G00141024001	chrC03:5629712-5630189	477	4.45589	12.1331	7.61308	26.5372	40.5517	27.8601	11.5993	23.4352	24.8837	33.2279	37.4682
BnaC03g11820D	GSBRNA2G00141053001	chrC03:5734068-5738266	3052	2.66857	4.02945	4.01605	6.0528	6.19991	6.52614	4.06801	6.32725	6.00461	6.55246	4.51638
BnaC03g11850D	GSBRNA2G00141057001	chrC03:5744771-5746435	1327	6.4805	3.48083	1.70138	4.89542	1.86764	1.24178	4.28594	3.59975	0.650553	4.27367	2.3136
BnaC03g13310D	GSBRNA2G00060745001	chrC03:6446695-6449759	1543	3.89064	17.6577	20.8302	16.2686	20.2914	26.3167	17.8868	19.4215	22.9196	14.0484	27.7994
BnaC03g13600D	GSBRNA2G00060780001	chrC03:6568308-6573493	2125	3.75188	11.4992	14.1526	12.1219	10.9984	13.9045	11.2474	12.0193	12.2691	9.01933	16.0662
BnaC03g13800D	GSBRNA2G00060803001	chrC03:6659998-6661352	1023	0.50231	6.6936	6.63337	6.91937	8.1667	9.89391	7.71737	7.08042	5.86782	4.94698	12.3092
BnaC03g14350D	GSBRNA2G00060864001	chrC03:6890820-6892591	1575	3.36246	3.82333	5.16136	6.89497	14.0089	8.0087	5.22997	7.15669	8.96292	7.13744	17.2517
BnaC03g14470D	GSBRNA2G00077323001	chrC03:6961709-6962488	692	44.1521	44.9409	36.2483	34.3063	10.2422	24.7599	22.9844	38.3289	35.6745	18.3818	3.16159
BnaC03g14810D	GSBRNA2G00010809001	chrC03:7212246-7214403	2085	2.06495	3.39902	3.53471	3.83721	6.55616	5.57048	2.35542	3.82835	5.4946	4.54626	5.57742
BnaC03g16990D	GSBRNA2G00024508001	chrC03:8642738-8645726	1698	33.8538	34.1796	28.3691	19.9515	3.10062	5.66988	21.3994	35.6515	31.2917	5.42995	0.487529
BnaC03g17520D	GSBRNA2G00024443001	chrC03:8957043-8960297	2050	0.71258	41.5648	41.261	35.3528	63.3616	70.0994	40.0746	39.9778	46.2606	34.9039	78.766
BnaC03g18040D	GSBRNA2G00132209001	chrC03:9240264-9241232	899	11.7485	16.7043	17.5699	18.0327	29.7867	14.3503	19.8908	14.8846	16.209	15.9876	29.5119
BnaC03g18390D	GSBRNA2G00132252001	chrC03:9437152-9439607	1374	8.11281	6.80531	10.3089	6.68841	1.81552	1.36618	9.11841	9.69328	9.03176	3.78122	3.56936
BnaC03g18590D	GSBRNA2G00132273001	chrC03:9524961-9528275	2215	1.63639	2.86073	2.22361	3.58311	4.67318	8.76688	2.79693	3.38488	5.30485	4.90169	4.34325
BnaC03g18640D	GSBRNA2G00132279001	chrC03:9542708-9547073	2982	0.23103	13.6415	17.8527	12.1956	17.8246	24.6769	15.4012	15.4178	16.2457	11.3229	28.9681
BnaC03g19130D	GSBRNA2G00132340001	chrC03:9906507-9908826	845	2.39037	26.7155	25.064	21.2421	27.5994	33.2351	14.9145	19.2923	30.8049	16.6966	36.6308
BnaC03g21360D	GSBRNA2G00079135001	chrC03:11540402-11542689	1794	3.80567	13.1247	7.09347	14.8156	13.8103	19.1151	8.86437	11.8393	24.7305	24.6914	8.03135
BnaC03g21390D	GSBRNA2G00079131001	chrC03:11555612-11557663	1345	1.80674	6.54485	7.00616	6.87349	9.50908	10.1739	7.77479	6.98377	7.57081	6.04254	13.0758
BnaC03g22030D	GSBRNA2G00028767001	chrC03:12056373-12059169	2180	7.77622	7.67858	12.5555	15.171	21.2099	7.00984	6.5263	5.99764	11.8589	9.41128	7.99259
BnaC03g22200D	GSBRNA2G00028749001	chrC03:12128932-12130252	926	8.9048	5.05631	5.47811	13.5335	30.568	13.4527	4.93374	10.9799	13.9761	20.88	5.24285
BnaC03g22390D	GSBRNA2G00028728001	chrC03:12284160-12285547	1387	2.05216	5.00876	5.46814	10.266	15.9193	15.7952	3.59426	12.8582	14.5546	13.312	6.57022
BnaC03g22940D	GSBRNA2G00019044001	chrC03:12717997-12719997	1913	0.467282	20.5335	26.1125	18.4459	34.5401	44.7489	23.6084	23.3467	29.5885	19.1094	44.7323
BnaC03g22990D	GSBRNA2G00019051001	chrC03:12743159-12744040	638	20.6258	10.9047	12.4093	8.05255	2.98146	2.49856	2.67684	13.2244	12.9073	2.81519	0.225985
BnaC03g23020D	GSBRNA2G00019054001	chrC03:12744834-12746079	1146	12.8691	5.63525	8.03563	3.56395	0.395241	0.90982	0.947252	7.66648	6.36177	0.325808	0.120126
BnaC03g23030D	GSBRNA2G00019055001	chrC03:12746233-12747367	772	15.3653	7.48547	9.28784	4.44772	1.13002	1.34878	0.855646	10.674	8.25843	1.60767	0.186261
BnaC03g23130D	GSBRNA2G00019073001	chrC03:12822611-12823525	818	18.4356	27.5952	20.5083	24.8091	52.2977	62.8747	16.0011	22.7474	34.0545	53.3322	67.3845
BnaC03g23540D	GSBRNA2G00019139001	chrC03:13126441-13127773	1332	1.14975	41.9192	33.7725	28.5891	52.7206	60.7395	27.7848	33.8783	33.8769	26.9557	56.7665
BnaC03g25270D	GSBRNA2G00101528001	chrC03:14200552-14201860	1308	0.896248	3.37093	3.96817	3.35604	7.03194	6.08888	3.01034	3.14207	3.05637	2.45128	5.29691
BnaC03g26740D	GSBRNA2G00066162001	chrC03:15296379-15298757	1812	1.1236	69.6764	72.6804	62.4487	92.4245	111.098	65.5	71.7823	83.3105	53.8966	123.668
BnaC03g27140D	GSBRNA2G00015903001	chrC03:15656750-15658327	1219	10.4548	19.8141	13.9269	27.5248	35.8718	40.3521	15.0944	25.9578	33.8241	34.5962	33.0969
BnaC03g27410D	GSBRNA2G00015860001	chrC03:15898419-15899631	1212	0.597631	35.5297	36.5718	30.4578	52.943	65.7926	33.4825	38.4815	33.9864	22.1352	57.6168
BnaC03g27530D	GSBRNA2G00015842001	chrC03:16008363-16009604	1173	0.554761	24.0927	28.4795	22.3751	37.7806	42.5085	24.8578	29.4968	27.7717	17.2466	45.1196
BnaC03g27970D	GSBRNA2G00055882001	chrC03:16339160-16341317	1905	2.55024	14.1711	18.0105	13.993	22.6569	24.7256	17.4655	16.9628	17.5586	14.3926	28.3756
BnaC03g30070D	GSBRNA2G00015665001	chrC03:18189495-18190738	1068	22.4335	25.0114	30.6703	38.3955	51.7841	47.5447	21.2734	35.0247	32.4864	54.421	46.2227
BnaC03g30130D	GSBRNA2G00015674001	chrC03:18238171-18240043	1209	1.92982	6.17401	8.04464	6.52319	6.49797	8.65183	5.03324	6.72489	6.90033	3.17077	6.21476
BnaC03g31100D	GSBRNA2G00153402001	chrC03:19061903-19068974	4187	3.15095	3.90856	3.61073	3.59901	4.14306	8.91905	3.91518	3.30047	3.56232	5.10577	6.59674
BnaC03g32350D	GSBRNA2G00153567001	chrC03:19884600-19887518	2408	1.37413	81.7636	68.9449	61.4344	94.1434	107.788	48.0331	54.8193	53.8132	44.0071	107.584
BnaC03g32510D	GSBRNA2G00153585001	chrC03:19959936-19966952	3275	10.8045	10.8516	8.97219	7.83248	1.81965	5.62242	6.18768	8.50741	10.1276	2.96096	0.214314
BnaC03g32550D	GSBRNA2G00153589001	chrC03:19975600-19978003	1836	3.55141	182.456	169.519	147.82	262.936	316.094	156.29	168.705	179.39	130.522	323.754
BnaC03g32570D	GSBRNA2G00153591001	chrC03:19982073-19982460	387	2.48513	130.199	105.161	95.4898	158.337	168.236	89.6829	112.804	128.056	73.9454	193.26
BnaC03g32580D	GSBRNA2G00153592001	chrC03:19984286-19984883	597	2.02921	11.9297	8.92827	9.72463	30.6507	23.9046	10.2249	11.3369	10.3022	14.1535	19.3867
BnaC03g32590D	GSBRNA2G00153593001	chrC03:19989404-19990113	709	3.41428	225.052	187.232	163.417	173.224	211.754	145.117	185.753	239.068	87.5197	232.615
BnaC03g32670D	GSBRNA2G00153606001	chrC03:20021785-20027056	3354	0.347442	15.1832	17.5883	15.1757	21.0606	27.0052	15.5612	16.9265	16.9546	10.3895	29.027
BnaC03g33160D	GSBRNA2G00153670001	chrC03:20253717-20256112	1880	0.590862	31.9162	38.1958	33.3097	42.5929	53.1424	33.84	37.3775	39.1536	24.5561	63.2437
BnaC03g33190D	GSBRNA2G00153674001	chrC03:20262702-20266788	2490	4.08305	3.5211	3.47682	1.6192	0.847999	0.827904	2.0988	2.55797	1.99665	2.15396	0.296097
BnaC03g33650D	GSBRNA2G00153733001	chrC03:20497290-20501091	1404	20.2706	12.3916	21.2053	22.0786	6.27593	12.4804	24.3317	15.9496	15.6802	12.5487	8.14149
BnaC03g33680D	GSBRNA2G00153737001	chrC03:20512237-20513413	1152	25.4437	44.7219	62.4337	43.9835	58.0096	69.037	49.6301	53.4666	53.1907	53.0147	85.1048
BnaC03g33810D	GSBRNA2G00071543001	chrC03:20585726-20587639	1248	7.68345	20.8328	22.6286	20.1971	23.797	29.6708	19.2173	23.0038	21.609	14.2942	34.3761
BnaC03g33860D	GSBRNA2G00071549001	chrC03:20600155-20601719	1049	1.7606	73.9435	79.3484	72.7566	94.6404	105.837	63.0691	74.4765	81.6499	52.2203	123.888
BnaC03g34350D	GSBRNA2G00071611001	chrC03:20837015-20839335	1748	4.20086	172.343	164.67	135.559	316.789	330.387	141.429	163.087	153.817	158.935	379.598
BnaC03g34360D	GSBRNA2G00071612001	chrC03:20839388-20840047	582	2.36636	126.626	122.49	97.7765	132.76	161.625	107.92	124.5	130.575	69.4305	182.846
BnaC03g34580D	GSBRNA2G00125323001	chrC03:20973434-20975192	1758	0.800836	14.4542	13.6285	11.7667	11.7447	14.783	12.2862	14.8781	15.4195	5.13975	18.4356
BnaC03g35490D	GSBRNA2G00125192001	chrC03:21548269-21549696	1260	7.52577	292.111	262.895	233.795	545.017	625.336	292.93	302.977	331.753	280.092	669.613
BnaC03g35500D	GSBRNA2G00125190001	chrC03:21557259-21558509	1066	4.56235	27.96	85.0624	23.5005	93.8054	182.98	40.5745	40.8763	28.6313	22.083	76.9344
BnaC03g37900D	GSBRNA2G00123615001	chrC03:23187171-23189541	2045	0.92302	19.019	29.9594	15.3514	53.6777	62.636	21.5781	25.07	20.8143	15.7377	40.6391
BnaC03g37910D	GSBRNA2G00123616001	chrC03:23193115-23195975	1890	5.04052	291.273	258.002	232.833	404.952	428.859	229.5	280.79	267.909	205.368	485.175
BnaC03g38600D	GSBRNA2G00123724001	chrC03:23750412-23751808	623	2.33991	69.6604	70.1619	63.5065	102.223	111.299	67.4664	80.8387	82.3672	49.0441	116.671
BnaC03g39000D	GSBRNA2G00123774001	chrC03:24045120-24046110	969	2.4233	8.0219	7.51259	19.9034	24.1517	16.042	5.65744	14.4557	23.5222	18.7822	11.7045
BnaC03g39170D	GSBRNA2G00123798001	chrC03:24167654-24169149	987	3.6802	4.13899	4.76019	10.718	22.6474	19.2593	5.90803	8.26238	10.3267	13.8241	29.2774
BnaC03g39840D	GSBRNA2G00123903001	chrC03:24856755-24858851	1278	2.56209	155.247	147.847	140.288	200.282	227.006	121.596	150.269	166.629	108.981	263.165
BnaC03g40170D	GSBRNA2G00123961001	chrC03:25175370-25176807	691	13.0449	16.2872	15.7853	14.3184	38.0187	60.006	15.514	18.9701	24.583	34.5738	60.2128
BnaC03g41310D	GSBRNA2G00059896001	chrC03:26262558-26268073	2694	3.52242	5.37743	6.1019	5.66601	8.17883	11.1991	6.30573	6.62372	7.85816	8.86361	10.1539
BnaC03g41470D	GSBRNA2G00059872001	chrC03:26429525-26431892	2225	1.21372	16.8454	20.3323	15.2916	24.8439	28.4834	17.334	18.9295	15.6217	13.8333	34.7402
BnaC03g41680D	GSBRNA2G00059842001	chrC03:26574668-26577368	2097	0.628303	38.5574	39.4328	35.1967	56.8526	65.3809	37.9819	39.3965	42.6172	31.6118	81.3239
BnaC03g42260D	GSBRNA2G00026392001	chrC03:27048428-27050334	1366	6.4143	42.266	52.8643	40.0643	52.5825	58.6601	45.9465	50.3408	56.0666	33.5906	73.6387
BnaC03g44780D	GSBRNA2G00085280001	chrC03:29892346-29896303	3026	1.28954	5.72986	7.37446	5.57889	6.47585	10.2522	6.01344	6.85544	7.08429	5.12578	11.6944
BnaC03g45190D	GSBRNA2G00149961001	chrC03:30197603-30198824	1221	0.654622	21.3917	22.9698	17.7519	35.5909	48.2714	23.6022	21.7676	24.0673	17.4398	49.9713
BnaC03g45950D	GSBRNA2G00150081001	chrC03:30969615-30972158	2355	0.593286	22.9638	30.3067	15.8447	42.9522	59.3303	24.6427	25.0842	23.4531	19.7963	40.2275
BnaC03g46580D	GSBRNA2G00150173001	chrC03:31570991-31577619	3423	0.416225	8.25247	13.0571	5.71146	19.2828	29.5598	9.75117	9.85399	8.17351	6.44193	16.5083
BnaC03g47090D	GSBRNA2G00047291001	chrC03:32086054-32086688	634	5.15036	7.33147	6.585	10.8488	20.3412	12.8342	7.07421	8.97462	9.7406	8.33273	8.74307
BnaC03g48070D	GSBRNA2G00124960001	chrC03:33049751-33051748	1528	32.2548	52.4645	33.3216	49.4439	138.806	184.047	34.0618	36.684	74.8267	98.3505	200.894
BnaC03g48540D	GSBRNA2G00062164001	chrC03:33516649-33518707	1518	20.0139	35.3778	35.8203	33.5702	45.0213	46.9874	30.7471	37.8339	38.6504	36.923	48.5171
BnaC03g48600D	GSBRNA2G00062171001	chrC03:33534509-33536336	967	18.3937	33.3098	32.4945	29.8132	39.0457	45.3275	30.3245	35.1267	35.3191	27.1099	46.2779
BnaC03g48810D	GSBRNA2G00079332001	chrC03:33632883-33635337	1578	0.72413	20.0203	19.7224	17.1149	22.7355	27.1815	15.9699	20.0317	21.2804	11.4193	30.8123
BnaC03g49470D	GSBRNA2G00079220001	chrC03:34346934-34348400	874	4.39491	6.21313	5.22641	4.92868	7.5323	15.4257	5.54775	3.95178	4.94891	7.65719	8.19467
BnaC03g50220D	GSBRNA2G00141693001	chrC03:34901995-34905678	2670	0.245873	5.94644	8.92992	5.57395	13.1971	18.8399	6.89972	7.08025	6.70502	5.57886	12.1716
BnaC03g51470D	GSBRNA2G00141491001	chrC03:36041198-36046903	2552	4.85044	22.5975	24.5754	18.7448	49.9827	63.31	27.737	25.5723	20.7046	23.986	54.0908
BnaC03g52390D	GSBRNA2G00145795001	chrC03:37231662-37232303	566	26.0517	42.2198	35.6661	58.1349	103.951	134.325	39.4094	60.6483	72.3074	101.273	137.659
BnaC03g52400D	GSBRNA2G00145796001	chrC03:37235459-37237976	2250	8.07681	12.6863	11.3782	15.6087	28.6781	37.1381	11.3222	14.371	23.7103	29.4878	36.4535
BnaC03g54030D	GSBRNA2G00015444001	chrC03:40739586-40742471	1937	0.442634	18.0048	15.5715	16.0259	32.6984	35.6058	18.5086	19.4028	19.9772	16.4738	42.7916
BnaC03g54480D	GSBRNA2G00147238001	chrC03:42276624-42279681	2002	0.818489	16.0373	20.8903	11.7478	42.2863	54.1295	17.6657	16.4983	16.1496	14.1338	41.6719
BnaC03g54940D	GSBRNA2G00000566001	chrC03:43284668-43285508	840	3.1433	14.5315	12.291	23.516	18.2511	23.2169	9.94281	27.2849	28.559	18.0908	2.91256
BnaC03g56160D	GSBRNA2G00144134001	chrC03:45417699-45419695	1069	33.0694	33.0543	35.3712	41.6527	80.8856	103.387	33.5353	41.1706	46.2168	75.3169	105.485
BnaC03g56180D	GSBRNA2G00144142001	chrC03:45519111-45521089	1738	1.09323	4.45461	3.81232	3.81839	6.63989	7.76319	4.02252	4.71384	5.19948	4.15059	7.2279
BnaC03g56410D	GSBRNA2G00144176001	chrC03:45704065-45706175	2019	6.53053	8.48293	8.79068	10.3447	17.0692	15.8041	8.53867	10.6454	12.599	15.0607	13.1924
BnaC03g56970D	GSBRNA2G00057040001	chrC03:46167485-46169576	1895	10.2803	10.9353	12.3846	14.8338	23.8007	32.7386	11.1828	14.3522	18.0997	21.2598	23.0405
BnaC03g57350D	GSBRNA2G00024705001	chrC03:46749346-46750239	645	1.68155	8.87072	11.776	8.07633	12.4624	13.7988	7.8864	10.2309	8.76447	6.81007	17.2355
BnaC03g58590D	GSBRNA2G00059172001	chrC03:47884308-47887895	2879	0.542505	1.88136	0.720757	1.345	3.20483	2.92422	0.678137	1.74532	2.86285	2.76937	0.906203
BnaC03g58640D	GSBRNA2G00059181001	chrC03:47923963-47924499	453	2.91007	64.2693	51.5046	58.9205	110.052	103.18	66.6411	72.8548	61.3122	63.179	167.742
BnaC03g58650D	GSBRNA2G00059182001	chrC03:47932195-47933972	1416	1.21711	73.948	69.3197	73.9244	94.1252	131.02	82.4798	94.2646	84.9631	84.7161	141.049
BnaC03g58660D	GSBRNA2G00059183001	chrC03:47939396-47941032	1236	0.739354	23.7911	24.6039	21.5616	38.5922	49.8106	24.096	29.2928	28.6371	21.7452	51.8068
BnaC03g58870D	GSBRNA2G00076363001	chrC03:48154193-48155877	947	3.8975	5.79088	5.49991	6.72271	12.5853	20.3005	5.61115	6.81304	8.51611	13.0674	18.1218
BnaC03g58910D	GSBRNA2G00076367001	chrC03:48164432-48165553	732	3.25745	36.4374	54.6071	30.7513	71.1942	95.3727	39.1039	52.7322	43.5894	25.5632	68.6196
BnaC03g59280D	GSBRNA2G00058242001	chrC03:48577893-48581149	2057	2.33581	4.18788	3.01949	5.16323	7.09654	7.42841	2.45016	4.22764	6.20539	5.79155	3.86644
BnaC03g60270D	GSBRNA2G00061090001	chrC03:49433600-49435518	948	19.8818	14.7401	16.9553	10.0402	6.2872	7.27956	8.49939	13.1378	9.74143	17.6154	4.72269
BnaC03g60370D	GSBRNA2G00061111001	chrC03:49558760-49561334	2574	0.637905	23.8048	29.6347	21.8876	34.6861	41.0539	24.8857	27.3859	28.7634	19.1721	45.1988
BnaC03g60420D	GSBRNA2G00061117001	chrC03:49575467-49578085	1740	0.576325	19.4758	18.3549	15.992	29.61	34.2572	18.1242	17.4308	20.5955	13.1613	32.1457
BnaC03g61550D	GSBRNA2G00018975001	chrC03:50726556-50727646	1003	9.44234	10.0045	9.82415	8.47807	2.10331	2.48539	9.92349	9.77546	10.8838	2.5455	1.18023
BnaC03g62750D	GSBRNA2G00055941001	chrC03:51995539-51996921	842	2.03716	121.611	111.166	97.6564	134.668	154.976	84.9223	125.349	127.202	64.9275	162.12
BnaC03g62800D	GSBRNA2G00055929001	chrC03:52086799-52091108	1679	11.7296	31.3054	34.1061	28.6262	43.2114	48.8754	32.7884	31.7387	35.0815	28.7011	52.2609
BnaC03g63960D	GSBRNA2G00047657001	chrC03:53450631-53452738	1409	6.32046	39.7531	39.3518	35.3959	43.1001	48.2046	36.7833	41.478	35.9501	26.5219	58.1969
BnaC03g66270D	GSBRNA2G00040108001	chrC03:56035833-56037719	1479	21.7159	35.7031	35.8056	55.7835	76.6269	101.103	32.1818	50.166	64.179	72.9113	52.6358
BnaC03g67980D	GSBRNA2G00116244001	chrC03:57586078-57587828	1118	11.4818	10.277	9.00211	9.67456	1.74025	4.59052	5.4461	4.7282	9.27909	4.75901	1.34712
BnaC03g69350D	GSBRNA2G00087589001	chrC03:59058831-59059722	737	53.9198	85.0662	52.0959	54.2091	36.7348	17.0877	50.0443	70.8273	53.1021	29.6956	27.6047
BnaC03g69560D	GSBRNA2G00033068001	chrC03:59391824-59394400	1353	17.5779	40.6233	39.1006	36.1028	48.8268	55.2756	32.8228	38.9454	38.3828	36.3644	49.5169
BnaC03g70650D	GSBRNA2G00032509001	chrC03:60268300-60271136	2003	1.53982	87.9707	95.7105	82.1469	113.899	136.451	87.1296	102.256	107.806	65.1656	175.509
BnaC03g71790D	GSBRNA2G00007279001	chrC03_random:334992-338193	1517	2.36019	29.4824	29.839	27.8495	37.9843	47.7293	29.8199	29.5153	34.0039	23.1881	49.8132
BnaC03g72320D	GSBRNA2G00028505001	chrC03_random:650556-651249	693	38.9734	45.3924	47.4124	55.2246	115.735	174.671	38.5729	39.071	68.5904	54.3374	48.9842
BnaC03g72420D	GSBRNA2G00097760001	chrC03_random:705618-707609	1704	9.73113	530.158	483.822	445.014	717.014	828.813	454.142	510.444	578.949	370.911	878.735
BnaC03g73380D	GSBRNA2G00019772001	chrC03_random:1513099-1514275	753	0.76731	48.1461	48.7015	46.6589	59.8725	66.3533	42.8532	54.5749	59.0429	33.9328	75.0722
BnaC03g73820D	GSBRNA2G00034665001	chrC03_random:1813888-1817148	2289	0.341047	19.1104	21.7558	16.1124	27.8302	32.079	19.0558	19.877	19.109	15.6432	37.9116
BnaC03g73850D	GSBRNA2G00008436001	chrC03_random:1882002-1885293	3291	0.386503	19.1778	25.5419	14.6106	26.552	35.3481	21.7482	23.2003	20.7797	15.2936	26.8825
BnaC03g73930D	GSBRNA2G00045306001	chrC03_random:1920759-1921566	807	3.02965	8.86185	10.0676	16.7473	28.0156	32.2932	10.8832	21.4832	19.1454	23.8185	6.1976
BnaC03g74630D	GSBRNA2G00033906001	chrC03_random:2632478-2636297	2119	2.01451	5.06854	5.19217	4.9398	8.20825	8.71341	4.35223	4.77098	5.15722	4.72868	7.50235
BnaC03g74760D	GSBRNA2G00033738001	chrC03_random:2844106-2845609	1288	1.63548	18.9407	12.5773	21.7404	78.1235	170.632	16.7632	20.4399	56.5667	88.5555	142.383
BnaC03g76390D	GSBRNA2G00034378001	chrC03_random:5028567-5029362	795	1.11877	68.1897	77.9861	60.1863	99.6749	99.0109	64.0903	75.5969	75.7232	49.7311	117.703
BnaC03g77110D	GSBRNA2G00004423001	chrC03_random:5673744-5675889	1974	1.20851	68.7646	88.3079	56.7686	114.763	125.143	79.5163	76.7186	77.4211	60.9773	118.296
BnaC03g78270D	GSBRNA2G00033887001	chrC03_random:6450628-6451586	722	5.28897	6.5107	8.8629	11.2434	22.3816	23.069	10.4411	7.64439	13.8434	18.6244	27.0126
BnaC04g00090D	GSBRNA2G00008339001	chrC04:31311-31998	687	83.8735	71.7235	59.204	41.1624	30.1382	39.3707	33.1492	63.4766	59.2365	29.853	1.60487
BnaC04g00440D	GSBRNA2G00064716001	chrC04:365363-366014	651	63.7691	284.399	280.919	238.719	286.075	304.081	221.85	303.784	325.453	155.751	355.555
BnaC04g00460D	GSBRNA2G00064714001	chrC04:370686-372710	1770	5.85478	311.846	324.541	272.051	397.163	480.022	285.788	324.392	361.638	215.848	523.652
BnaC04g00950D	GSBRNA2G00074030001	chrC04:778955-780317	1221	1.03002	45.3243	46.5885	40.2793	71.6269	76.0287	46.2904	50.5198	50.6571	37.9867	94.344
BnaC04g01980D	GSBRNA2G00024256001	chrC04:1521843-1523901	1605	4.00117	6.77221	4.98599	7.76465	7.99812	16.1219	4.49105	8.03321	13.8282	9.34489	3.28104
BnaC04g02260D	GSBRNA2G00091684001	chrC04:1742828-1744781	1425	0.383014	11.7243	13.1047	11.6215	14.6257	20.2727	12.1241	12.0772	13.9086	9.34791	19.3087
BnaC04g02280D	GSBRNA2G00091687001	chrC04:1749059-1749306	247	23.412	909.114	757.923	754.012	1918.58	2130.44	794.778	736.337	822.068	827.884	2283.31
BnaC04g03750D	GSBRNA2G00087932001	chrC04:2700836-2704186	1457	4.49682	7.53077	7.15472	6.85561	16.0657	9.8675	4.63499	4.31615	4.60437	8.12628	14.5566
BnaC04g05270D	GSBRNA2G00012629001	chrC04:3733319-3736868	1611	2.13369	56.7775	50.9472	47.1735	63.8858	73.4549	45.597	50.2716	53.9731	33.5882	79.2226
BnaC04g05790D	GSBRNA2G00012553001	chrC04:4113149-4114855	1294	12.6387	17.4243	16.3582	18.7108	30.8856	49.5992	15.4158	19.0099	29.4961	34.6186	38.5815
BnaC04g06800D	GSBRNA2G00152815001	chrC04:4910116-4912485	1669	0.510834	5.00826	2.32804	5.20335	11.8497	14.8899	2.24703	3.8115	9.70776	11.7415	6.16809
BnaC04g07740D	GSBRNA2G00152677001	chrC04:5741580-5744303	1253	3.66694	3.71881	5.08989	4.17563	12.5258	4.78435	2.81683	3.42429	3.22113	4.20429	7.01284
BnaC04g09250D	GSBRNA2G00141196001	chrC04:7005379-7007460	1096	1.10826	56.414	55.8101	50.0964	83.2348	101.619	50.266	62.2659	63.0131	43.0631	116.333
BnaC04g11500D	GSBRNA2G00009018001	chrC04:8987934-8991938	3034	0.481827	37.5549	48.936	33.7112	43.1301	53.2142	37.5001	41.3875	46.8525	26.4817	61.8861
BnaC04g14700D	GSBRNA2G00113369001	chrC04:12140442-12142176	1173	16.7833	10.141	11.5494	9.29733	5.97796	4.56941	6.86217	11.0967	9.04953	8.37944	2.05564
BnaC04g14770D	GSBRNA2G00113357001	chrC04:12216371-12217862	1491	10.5335	5.74954	6.51476	5.34111	4.51309	3.40185	6.42263	6.51938	4.32044	8.30033	4.18711
BnaC04g15370D	GSBRNA2G00090065001	chrC04:13147538-13148458	920	1.79106	3.7472	9.71841	3.64046	17.8833	1.50947	1.83975	1.42495	2.62264	2.42047	6.65391
BnaC04g17620D	GSBRNA2G00148478001	chrC04:16144086-16145639	1108	10.9344	12.6909	9.74151	15.2013	25.2701	40.5844	17.1395	10.5543	18.4531	10.5216	12.8115
BnaC04g19100D	GSBRNA2G00124091001	chrC04:19276819-19278348	989	0.893868	33.3967	35.1029	31.5977	37.8224	48.439	24.8097	28.5087	34.1165	17.9301	42.106
BnaC04g19370D	GSBRNA2G00000439001	chrC04:19972793-19974051	1164	43.5361	34.1148	35.1327	24.5545	14.3961	19.7073	29.7194	33.9337	28.1128	25.8223	6.99082
BnaC04g22130D	GSBRNA2G00089350001	chrC04:23268052-23270133	1074	0.526817	15.4701	23.2052	14.5149	34.0967	52.1521	20.1509	24.3485	15.8845	12.3196	31.4906
BnaC04g23900D	GSBRNA2G00087884001	chrC04:24993779-24995144	1365	1.94851	5.80734	5.94349	11.7553	16.7265	19.9913	4.82112	8.96198	17.557	12.9754	13.1085
BnaC04g24260D	GSBRNA2G00047035001	chrC04:25270462-25272216	920	8.29888	13.0987	11.9401	11.1111	16.3949	21.5817	12.076	13.4123	12.7584	16.1218	20.546
BnaC04g24800D	GSBRNA2G00087282001	chrC04:25690221-25690932	711	4.64842	16.0866	9.81663	22.8819	23.0214	26.6047	9.31022	20.5502	29.05	27.0715	10.384
BnaC04g25500D	GSBRNA2G00115206001	chrC04:26635738-26638091	1644	3.8262	140.202	159.253	127.368	194.12	232.248	136.834	170.192	190.047	115.464	284.907
BnaC04g25940D	GSBRNA2G00115121001	chrC04:27173449-27177743	2601	0.841086	51.4752	54.1891	44.7081	67.376	80.5786	48.5768	52.6007	57.534	38.3121	83.7167
BnaC04g26710D	GSBRNA2G00071030001	chrC04:28039602-28041266	1281	6.42532	9.1016	7.40478	10.289	11.2311	19.507	9.6029	10.2309	13.8284	12.9578	17.2621
BnaC04g27770D	GSBRNA2G00101094001	chrC04:29155884-29158705	1483	10.8236	17.1467	11.6193	12.9397	23.0864	35.029	14.4244	17.4358	24.4816	30.6219	8.57097
BnaC04g27800D	GSBRNA2G00101088001	chrC04:29196787-29198000	1186	23.1311	35.2964	29.2189	31.5443	51.9751	56.2511	30.1805	37.563	42.4469	49.8849	48.8735
BnaC04g28060D	GSBRNA2G00101037001	chrC04:29471180-29473081	1374	3.14865	114.041	135.538	86.3972	204.882	276.567	122.173	118.349	132.949	82.0506	204.15
BnaC04g28220D	GSBRNA2G00101008001	chrC04:29682847-29683475	628	4.20743	12.1817	8.06625	17.2424	38.2687	32.9962	5.82637	15.306	17.7264	32.6862	27.2998
BnaC04g28260D	GSBRNA2G00101001001	chrC04:29726485-29727295	716	5.87466	23.5404	23.0749	23.2592	22.9605	31.9057	23.6937	26.7078	25.6212	15.1192	32.4946
BnaC04g29740D	GSBRNA2G00087117001	chrC04:31411513-31414099	1367	8.24864	12.7306	9.07809	15.2115	18.7242	22.8941	8.49231	12.1991	18.1912	20.2823	8.24982
BnaC04g31430D	GSBRNA2G00064823001	chrC04:33318014-33320723	1549	0.384112	18.7909	21.3274	17.9069	21.58	29.7971	17.8322	22.0722	25.1935	13.8634	31.3609
BnaC04g32770D	GSBRNA2G00060412001	chrC04:34522351-34525285	1879	2.15126	3.7325	2.03446	2.90815	4.83949	9.93852	2.88058	3.08028	6.23459	6.1052	9.79542
BnaC04g32950D	GSBRNA2G00060441001	chrC04:34643698-34646031	1644	1.30628	1.97838	2.01705	3.52836	8.77309	4.73117	1.65507	3.34454	3.47561	2.59412	1.64376
BnaC04g33430D	GSBRNA2G00108084001	chrC04:35061282-35064864	2471	5.06253	17.3598	17.5878	15.8391	23.6972	29.8679	16.1864	17.431	19.1266	17.6144	29.6206
BnaC04g33890D	GSBRNA2G00108140001	chrC04:35390685-35392686	1195	1.10723	26.4054	32.2249	22.2285	28.5983	40.4284	21.757	34.7888	48.4339	13.5015	34.0813
BnaC04g34320D	GSBRNA2G00108220001	chrC04:35892180-35895552	1482	41.4874	30.0834	25.5266	27.4066	9.35534	8.89296	22.4713	35.1455	34.3339	17.1952	4.35181
BnaC04g34480D	GSBRNA2G00108256001	chrC04:36074991-36075468	477	141.874	162.094	177.249	205.133	369.961	421.76	139.353	204.104	252.251	344.58	360.059
BnaC04g36920D	GSBRNA2G00012167001	chrC04:38375692-38377595	1464	1.70155	18.9978	44.8182	11.8552	65.4085	105.829	17.8325	16.0683	12.9536	8.57158	19.7693
BnaC04g38330D	GSBRNA2G00127608001	chrC04:39538094-39540762	1926	3.76401	5.3286	5.63516	5.2567	10.146	6.46589	5.87316	5.01155	5.54485	6.97326	19.4983
BnaC04g38620D	GSBRNA2G00127643001	chrC04:39815361-39816307	946	9.23421	22.3828	23.8299	35.2468	65.0723	96.0981	19.7023	35.518	48.2601	62.2597	49.8524
BnaC04g40810D	GSBRNA2G00105188001	chrC04:41626211-41627764	1398	0.944825	3.10353	2.18157	6.92303	4.93987	6.56997	2.62651	6.29154	8.25035	4.40746	2.03102
BnaC04g41140D	GSBRNA2G00105134001	chrC04:41925610-41927968	1697	15.8832	18.6656	17.5956	19.1711	43.2168	69.3888	16.7573	21.8197	29.9493	39.7716	59.6387
BnaC04g42320D	GSBRNA2G00085697001	chrC04:42891175-42894233	1978	0.774248	21.3781	24.1767	21.5968	30.3736	37.6587	21.4662	24.7384	26.4395	17.5708	40.922
BnaC04g43390D	GSBRNA2G00024144001	chrC04:43692796-43695186	1557	12.869	9.32987	14.0017	14.0927	2.68373	2.22547	8.12698	13.0492	15.9634	6.36181	4.82927
BnaC04g43840D	GSBRNA2G00024068001	chrC04:44098354-44102576	2994	0.323106	14.2475	18.6927	13.1613	17.6591	23.4617	15.1983	16.5152	17.7633	10.4668	28.7433
BnaC04g43980D	GSBRNA2G00024047001	chrC04:44198730-44200214	1123	3.27586	7.7659	3.81096	8.56797	10.139	11.9929	3.44347	6.0055	10.9037	13.9772	5.15157
BnaC04g45600D	GSBRNA2G00155313001	chrC04:45210395-45215662	2280	1.87627	5.32474	6.84532	4.33865	8.00634	9.8928	5.79757	5.96708	5.53248	4.46471	8.05021
BnaC04g46450D	GSBRNA2G00155208001	chrC04:45785929-45788337	1704	11.0847	20.9375	21.2685	19.407	26.5566	29.6042	19.9885	22.4655	21.596	19.4236	26.2652
BnaC04g46690D	GSBRNA2G00155183001	chrC04:45921785-45931498	1734	2.6549	22.7285	22.0833	18.0197	35.4513	39.7185	21.3816	21.8341	23.539	17.0459	39.0271
BnaC04g46980D	GSBRNA2G00155140001	chrC04:46119323-46122079	1580	18.315	10.3249	10.1875	11.9106	5.21619	8.10413	6.47405	11.3775	11.5787	6.0539	1.07029
BnaC04g47440D	GSBRNA2G00084595001	chrC04:46420608-46422489	1762	0.456616	23.0115	24.3349	21.0501	28.3398	35.9972	22.289	25.725	29.603	14.8644	36.9196
BnaC04g48490D	GSBRNA2G00084739001	chrC04:47080865-47081712	847	1.61721	7.49391	6.6052	16.0506	22.7642	27.9198	4.60814	11.9981	21.1568	14.9121	20.0503
BnaC04g48670D	GSBRNA2G00084762001	chrC04:47173672-47178707	3372	10.108	21.0188	25.93	19.7879	29.8798	39.6766	22.8663	21.0861	22.205	23.4069	35.4657
BnaC04g48730D	GSBRNA2G00021941001	chrC04:47239159-47241726	1708	0.563008	37.6074	33.7164	32.3491	42.8102	46.6791	28.9063	36.3085	39.6353	26.1163	57.7168
BnaC04g50020D	GSBRNA2G00037356001	chrC04:47847070-47848258	760	0.827888	28.6925	36.5869	36.6422	36.1228	70.093	30.7039	32.6958	34.8594	20.9414	87.0565
BnaC04g50470D	GSBRNA2G00037295001	chrC04:48136286-48137631	852	0.751349	18.7524	25.2104	15.6281	49.0918	57.0435	25.3455	29.1239	24.3797	14.46	37.0877
BnaC04g50490D	GSBRNA2G00037293001	chrC04:48140797-48142422	793	15.6534	24.5591	20.4926	24.4327	47.3922	65.369	24.5348	23.9014	33.096	32.036	73.2339
BnaC04g50850D	GSBRNA2G00037256001	chrC04:48304335-48306343	1752	22.3542	43.6546	49.8356	41.9566	55.0932	60.9058	46.3003	51.7118	52.9858	47.5417	74.3292
BnaC04g51500D	GSBRNA2G00038181001	chrC04:48806540-48807479	939	5.34099	251.177	227.114	214.531	311.268	336.89	206.874	245.219	269.104	171.358	412.231
BnaC04g55020D	GSBRNA2G00007760001	chrC04_random:2637550-2639752	1298	80.981	215.008	215.268	181.424	292.395	314.612	224.181	244.923	277.16	243.475	453.739
BnaC04g56100D	GSBRNA2G00046896001	chrC04_random:3768176-3771920	2633	2.46114	2.57494	2.45191	3.03639	7.09887	3.86544	1.3967	2.10513	2.71239	5.24183	2.61835
BnaC05g00310D	GSBRNA2G00085323001	chrC05:150985-152587	915	0.581281	12.0529	11.3007	10.3158	16.5538	19.544	11.9126	13.3104	14.4832	10.6091	20.785
BnaC05g00650D	GSBRNA2G00085370001	chrC05:348189-348909	720	1.76486	85.1477	94.8797	73.2407	131.837	162.014	82.9618	93.7869	97.4925	69.6476	177.047
BnaC05g01430D	GSBRNA2G00085465001	chrC05:746688-748532	1580	6.03372	237.328	239.499	217.932	367.708	447.839	228.148	275.469	292.841	206.453	506.937
BnaC05g01680D	GSBRNA2G00002667001	chrC05:854357-856305	1401	0.448385	19.3767	25.1939	17.5729	24.0111	36.2718	18.0425	24.3346	24.9187	12.9597	34.5108
BnaC05g02570D	GSBRNA2G00002764001	chrC05:1250504-1254969	3078	0.299894	10.9734	14.5691	8.89166	15.4135	19.8494	13.0114	11.9266	12.5203	7.16786	16.8753
BnaC05g03710D	GSBRNA2G00031936001	chrC05:1805020-1808250	2601	0.576318	30.2714	36.0906	27.8631	46.2782	52.146	31.4123	34.1952	33.9114	24.3147	61.2341
BnaC05g04080D	GSBRNA2G00031979001	chrC05:1988936-1993604	2745	0.478101	11.817	12.5303	10.6362	15.1087	16.6352	10.6214	11.4721	13.0127	8.15799	17.4901
BnaC05g04600D	GSBRNA2G00032039001	chrC05:2260658-2262854	1201	1.79529	35.3878	35.0045	29.259	38.4326	47.6254	31.3836	37.2186	40.8225	20.5714	47.6999
BnaC05g06220D	GSBRNA2G00100569001	chrC05:3057621-3059236	1442	24.0307	22.7894	20.3517	15.4605	8.95603	10.2181	27.4756	19.758	15.6528	21.4921	18.4483
BnaC05g08260D	GSBRNA2G00008834001	chrC05:4337958-4338465	507	2.709	100.229	92.7983	77.5909	122.71	136.31	80.352	107.8	116.787	54.4292	143.519
BnaC05g09840D	GSBRNA2G00044572001	chrC05:5493257-5495571	1502	21.2	53.248	65.3823	51.28	72.5204	75.0007	65.2674	66.5831	60.2944	40.603	79.3687
BnaC05g09910D	GSBRNA2G00044564001	chrC05:5516925-5518912	1727	1.6967	3.68159	4.06027	5.22144	18.1411	20.3865	4.90245	5.25634	12.5801	18.4141	33.1292
BnaC05g09920D	GSBRNA2G00044563001	chrC05:5518993-5521927	1161	6.45832	8.43955	8.00635	8.22408	15.7114	22.7827	9.39928	6.99586	12.0533	18.2142	37.2834
BnaC05g10210D	GSBRNA2G00062035001	chrC05:5736645-5739548	1909	0.949487	27.7845	25.0535	25.9155	27.2048	29.9138	22.1595	27.3044	32.1414	13.469	33.3658
BnaC05g10520D	GSBRNA2G00067747001	chrC05:6030821-6032433	1191	22.8598	49.0129	51.2373	49.8036	75.3287	79.5838	52.9536	55.5319	52.484	59.1508	87.9503
BnaC05g10650D	GSBRNA2G00067730001	chrC05:6125134-6127180	1682	3.60877	176.814	199.218	171.058	249.817	282.843	182.804	188.313	211.967	145.012	355.782
BnaC05g10770D	GSBRNA2G00067715001	chrC05:6194067-6195705	1398	21.6718	34.1193	36.633	46.7661	70.115	68.7196	48.7465	61.5685	61.4623	101.089	177.287
BnaC05g12390D	GSBRNA2G00054182001	chrC05:7168046-7171596	1566	0.431849	11.9865	11.9401	10.6075	14.3292	20.2053	11.6697	12.2011	14.2063	9.05898	21.2127
BnaC05g12500D	GSBRNA2G00054167001	chrC05:7294146-7295715	1569	0.686183	2.34778	0.694697	1.96632	9.29532	15.9876	0.699305	0.992378	2.45957	4.50287	3.79397
BnaC05g14050D	GSBRNA2G00006501001	chrC05:8132533-8133570	945	3.97923	7.74079	10.5903	12.9609	15.0226	15.3215	6.99256	13.6583	11.207	10.554	9.06885
BnaC05g14670D	GSBRNA2G00006585001	chrC05:8656458-8658208	1675	0.559101	31.7383	30.8302	25.6452	43.6306	49.673	27.1453	32.0869	35.4452	21.9845	59.015
BnaC05g14980D	GSBRNA2G00072347001	chrC05:8949568-8950277	567	3.33037	12.7514	37.2253	11.8659	44.5036	101.096	16.9718	14.7136	9.49177	10.0875	31.7515
BnaC05g15590D	GSBRNA2G00079688001	chrC05:9417630-9418723	1093	14.7882	16.7037	11.2807	17.6634	35.2547	39.6286	4.34961	13.0606	22.7422	29.5987	36.4878
BnaC05g17150D	GSBRNA2G00119283001	chrC05:10776391-10777750	1192	7.21178	9.64144	8.52456	11.0385	15.2677	19.4892	8.72567	8.95121	12.6748	10.0261	16.2726
BnaC05g17480D	GSBRNA2G00065567001	chrC05:11179841-11181269	1078	10.3977	19.1326	17.3345	22.6894	33.8617	42.6084	21.9319	23.3128	28.8038	44.0386	29.2837
BnaC05g17530D	GSBRNA2G00065573001	chrC05:11197505-11200322	1542	8.68713	15.054	13.8335	12.9779	17.8636	22.0114	13.4052	14.5355	14.7642	13.9634	19.6432
BnaC05g18500D	GSBRNA2G00119391001	chrC05:12230899-12233256	1856	8.53306	5.80782	6.55664	4.11572	2.59883	3.30263	2.72724	7.19266	8.52017	4.35067	0.640993
BnaC05g19630D	GSBRNA2G00084513001	chrC05:13111051-13115612	2022	17.498	22.0502	20.3282	29.2702	47.328	54.3565	19.2943	28.7416	37.4939	42.8271	45.4179
BnaC05g21480D	GSBRNA2G00142236001	chrC05:15206539-15207473	934	2.46347	9.76607	4.67921	12.6939	14.4295	14.6317	7.04998	12.7226	18.9629	16.0123	5.96182
BnaC05g22110D	GSBRNA2G00108466001	chrC05:15994031-15995493	846	1.74423	25.4168	45.2667	25.1235	62.7261	83.8631	27.2685	39.1847	25.7085	18.2423	44.0158
BnaC05g23490D	GSBRNA2G00031184001	chrC05:17582274-17584181	1280	1.34776	2.58403	2.15325	3.44365	11.5496	6.77294	1.58293	2.96838	4.07262	2.57818	1.06731
BnaC05g24240D	GSBRNA2G00019229001	chrC05:18566060-18568851	2712	2.65783	5.09951	6.8086	5.02176	5.64928	7.20399	5.33238	5.62111	5.90061	5.16968	7.41533
BnaC05g25300D	GSBRNA2G00032952001	chrC05:20165477-20167896	2340	1.49038	4.20677	4.9747	4.16034	4.59747	5.85643	4.54272	4.77263	4.81378	3.53943	5.6939
BnaC05g25430D	GSBRNA2G00032981001	chrC05:20368932-20370444	903	0.923607	5.2555	5.50756	5.48018	7.66399	10.7066	4.74414	5.36051	6.27527	4.96754	8.4535
BnaC05g29750D	GSBRNA2G00032154001	chrC05:28658311-28661206	1441	0.942286	37.3796	37.0044	32.0961	46.0255	59.3354	31.6939	36.1689	38.6458	26.9381	62.0941
BnaC05g30810D	GSBRNA2G00095844001	chrC05:29913038-29919180	3488	0.276983	3.03465	4.35094	2.73337	5.11951	7.34781	3.88253	3.88165	4.02556	2.16867	5.84588
BnaC05g32670D	GSBRNA2G00026919001	chrC05:32183880-32185027	875	2.41232	7.68755	7.2187	6.10784	14.6326	16.8167	9.40478	9.05173	9.4088	9.03944	15.1442
BnaC05g33160D	GSBRNA2G00107391001	chrC05:32659895-32660958	1021	2.89571	13.7604	12.9529	26.76	35.0738	30.6978	8.16607	24.7864	27.723	27.1702	8.95427
BnaC05g33800D	GSBRNA2G00107515001	chrC05:33309343-33311956	1506	16.8117	19.3866	18.388	21.0179	32.6359	50.6133	19.1225	20.731	27.0579	34.9774	39.7735
BnaC05g35370D	GSBRNA2G00101719001	chrC05:34656836-34657873	957	1.19371	60.6323	69.4411	65.5377	82.8294	91.308	57.4948	69.2776	82.0906	43.5067	115.132
BnaC05g35510D	GSBRNA2G00101740001	chrC05:34873172-34878384	2547	2.78819	20.3547	22.2471	16.2338	24.6758	32.5273	17.3762	23.3285	25.6175	14.2652	31.5874
BnaC05g35890D	GSBRNA2G00101786001	chrC05:35102646-35104795	967	0.622961	14.8591	16.864	12.7418	19.3179	23.7088	14.9631	18.952	19.9749	11.1734	26.4612
BnaC05g36000D	GSBRNA2G00101801001	chrC05:35200837-35204750	1875	2.83008	9.92824	8.41124	9.78317	11.7119	13.412	10.7831	9.12379	11.3223	9.31984	16.5674
BnaC05g36370D	GSBRNA2G00101876001	chrC05:35601131-35602624	1064	0.495145	9.86432	13.7708	8.18499	23.839	28.9194	9.90836	10.6341	9.65647	7.08691	16.4818
BnaC05g36540D	GSBRNA2G00101902001	chrC05:35815166-35816653	1056	45.7063	34.4674	36.684	39.909	14.6608	18.6876	28.78	36.5441	32.3166	25.926	4.04136
BnaC05g36760D	GSBRNA2G00076064001	chrC05:36024618-36027890	610	21.4433	21.2498	27.3445	35.4087	68.1511	21.0166	14.4406	12.2864	25.2396	23.7503	26.2028
BnaC05g37000D	GSBRNA2G00044742001	chrC05:36193469-36197696	2670	2.3738	1.79143	1.78303	1.31958	0.167928	0.105922	1.6373	1.60658	1.8395	0.45626	0.353842
BnaC05g37800D	GSBRNA2G00020115001	chrC05:36663674-36664754	987	48.1288	90.6117	46.4487	36.439	6.68708	35.201	72.8441	48.6486	47.4095	36.4022	26.0446
BnaC05g38940D	GSBRNA2G00106108001	chrC05:37493099-37504117	6334	11.579	10.3782	7.4472	59.6306	80.0543	119.92	46.7939	71.1696	12.6158	86.0803	242.811
BnaC05g39020D	GSBRNA2G00106094001	chrC05:37582230-37592373	5856	15.2523	17.4529	10.291	10.6373	4.58862	7.46393	7.32629	11.1486	14.2145	6.03303	2.14243
BnaC05g39970D	GSBRNA2G00023808001	chrC05:38307762-38310436	1941	5.43714	302.066	317.443	265.387	422.792	446.907	260.633	315.919	351.688	230.9	563.334
BnaC05g39980D	GSBRNA2G00023807001	chrC05:38312815-38315047	1913	2.57468	88.1133	105.259	67.0971	167.999	215.496	87.0245	105.523	92.0303	68.7007	174.136
BnaC05g40510D	GSBRNA2G00074358001	chrC05:38661297-38663262	1329	0.566736	21.4082	28.4525	17.0447	26.0448	38.086	20.0381	29.118	28.8004	12.2823	27.6091
BnaC05g42780D	GSBRNA2G00110925001	chrC05:39967994-39972586	2484	160.864	121.256	121.381	88.1713	41.7178	59.6675	74.5677	97.8747	82.7122	70.734	13.9419
BnaC05g45340D	GSBRNA2G00120093001	chrC05:41286428-41289120	1479	4.86618	9.13559	10.2457	8.90723	12.3713	15.7215	8.81267	11.1725	10.7113	7.45451	12.1249
BnaC05g45900D	GSBRNA2G00120022001	chrC05:41622474-41623403	841	1.34997	8.20212	15.0435	7.28499	19.021	26.2155	13.4845	18.8917	13.3115	3.78528	6.29435
BnaC05g46960D	GSBRNA2G00073888001	chrC05:42202842-42205701	2213	8.69272	6.50499	6.61796	5.4042	2.34745	4.47446	7.38692	7.41898	6.41472	3.61036	1.68495
BnaC05g47160D	GSBRNA2G00073863001	chrC05:42289742-42291766	1245	1.79325	10.0357	11.8328	9.69364	15.6588	15.1596	8.11299	10.6744	11.7812	7.23298	15.1637
BnaC05g47350D	GSBRNA2G00075652001	chrC05:42370882-42374401	1377	1.53224	3.23646	4.42084	5.16975	11.5368	1.7051	1.58	1.95396	2.99051	3.02096	5.65779
BnaC05g47720D	GSBRNA2G00043838001	chrC05:42589490-42591211	1141	24.6882	27.1893	22.0757	18.9964	4.69109	7.86113	17.2508	24.4549	21.6965	7.79087	3.35209
BnaC05g48240D	GSBRNA2G00076258001	chrC05:42805947-42809057	1667	14.8421	13.6898	16.7276	18.1366	46.5129	60.6237	18.2695	19.9642	22.8289	50.3582	78.6125
BnaC05g48570D	GSBRNA2G00076298001	chrC05:43003795-43006637	2113	5.5367	11.5842	13.0843	12.4561	13.9863	16.7513	12.3212	12.7916	15.3884	10.2583	17.4309
BnaC05g48590D	GSBRNA2G00076300001	chrC05:43015086-43020684	3467	0.220341	12.6023	14.5039	11.0793	17.3904	21.7747	12.84	13.9738	15.0815	10.5194	24.2639
BnaC05g50160D	GSBRNA2G00043765001	chrC05_random:820150-821543	1393	1.08546	6.72208	4.62089	10.0362	11.7107	13.5757	3.72125	10.2911	15.501	9.88892	6.74367
BnaC05g50380D	GSBRNA2G00017623001	chrC05_random:1131732-1132437	610	1.45538	14.583	11.7124	12.1971	17.4337	18.0344	11.1161	12.8201	12.6452	7.90848	16.5149
BnaC05g50860D	GSBRNA2G00003959001	chrC05_random:1684787-1687953	2314	0.455571	20.396	23.9766	18.0855	33.1443	38.0185	21.5645	22.685	21.4786	18.0942	39.0912
BnaC05g51340D	GSBRNA2G00014756001	chrC05_random:2313774-2314164	390	20.4416	35.022	39.8148	44.5744	69.0831	60.0335	21.0392	46.1386	48.1575	50.8787	14.104
BnaC06g00180D	GSBRNA2G00095097001	chrC06:279020-281085	1641	8.8648	19.4196	22.2946	20.0027	23.1704	23.0208	17.4687	22.6753	21.8536	16.3208	29.1219
BnaC06g04530D	GSBRNA2G00093856001	chrC06:5185273-5185794	521	40.2444	68.0695	43.1241	35.8105	12.7006	9.53683	28.2315	59.4248	42.6782	16.7657	13.8325
BnaC06g05410D	GSBRNA2G00069080001	chrC06:6137001-6138659	1107	4.79045	15.6794	18.174	15.0059	21.8792	26.018	13.488	17.5177	18.0443	12.5741	27.4279
BnaC06g05990D	GSBRNA2G00033566001	chrC06:6493883-6495189	925	11.3079	17.565	7.59526	6.84882	1.50438	8.61332	4.49444	6.54991	11.1581	5.78079	0.403431
BnaC06g06860D	GSBRNA2G00053746001	chrC06:7431999-7435319	1559	4.26083	9.97377	11.5842	10.6958	13.163	14.1278	8.9236	12.1665	11.5003	8.51545	18.1849
BnaC06g09380D	GSBRNA2G00147102001	chrC06:11302708-11303719	558	178.817	165.731	135.648	116.813	58.1102	58.2236	91.0999	149.839	130.563	66.0796	8.73774
BnaC06g10490D	GSBRNA2G00034799001	chrC06:12652823-12653908	630	1.71375	53.8511	44.9856	50.7213	98.3467	111.265	46.3497	61.3893	54.9033	44.9753	116.254
BnaC06g12160D	GSBRNA2G00036788001	chrC06:14492749-14497614	1676	5.86259	9.64273	8.13704	8.46854	15.8307	9.73895	5.31421	6.5687	6.54508	7.6232	10.7385
BnaC06g12590D	GSBRNA2G00063187001	chrC06:15163559-15166457	2252	0.356767	17.2354	21.2345	17.9991	28.8448	35.647	18.2805	18.283	20.6115	17.7529	43.0531
BnaC06g12920D	GSBRNA2G00049848001	chrC06:15605710-15608767	2163	9.60361	8.30763	8.60696	5.31913	3.27592	4.96526	5.68209	6.51647	6.12008	3.81539	2.12784
BnaC06g13430D	GSBRNA2G00049947001	chrC06:16154369-16156908	1415	0.935112	5.8645	4.257	5.74516	6.37337	8.38823	4.71406	4.76939	6.47113	2.96073	6.53951
BnaC06g14040D	GSBRNA2G00071362001	chrC06:16889001-16890615	1614	3.60895	174.294	173.213	137.392	243.733	286.16	153.821	177.553	175.283	128.401	317.592
BnaC06g14100D	GSBRNA2G00071356001	chrC06:16927423-16928779	1248	11.0067	16.5438	19.1029	17.6545	31.1284	34.3472	16.723	20.6478	24.9108	31.1246	29.7801
BnaC06g14690D	GSBRNA2G00124689001	chrC06:17442236-17443353	1117	11.0618	10.818	5.50135	64.7871	104.955	177.516	51.2749	137.348	13.2744	102.059	89.5341
BnaC06g15040D	GSBRNA2G00124625001	chrC06:17769645-17772312	1658	1.5681	6.27421	6.44778	6.87927	9.64812	9.38666	7.12785	7.30444	7.1548	5.69702	9.51891
BnaC06g15410D	GSBRNA2G00124570001	chrC06:18076976-18080931	2552	0.483725	25.5898	27.1763	22.2612	40.34	50.3426	27.7001	24.4351	29.3425	18.6939	47.152
BnaC06g16600D	GSBRNA2G00105839001	chrC06:19523106-19525394	1560	16.3301	27.6397	26.7514	25.2407	31.9638	38.6296	27.3681	28.033	28.2522	25.6226	38.2312
BnaC06g17580D	GSBRNA2G00105980001	chrC06:20172595-20175616	1775	0.873494	5.72121	4.71738	4.65923	8.99017	11.767	6.67215	6.60883	8.21193	4.0755	12.9664
BnaC06g18540D	GSBRNA2G00028981001	chrC06:20889429-20891103	1674	4.48725	7.21285	7.35452	6.94513	10.4707	11.6343	8.96951	8.55728	8.51222	8.22042	11.4956
BnaC06g18580D	GSBRNA2G00028989001	chrC06:20929704-20932437	2017	1.4033	18.4035	18.0114	17.9818	24.9446	33.1264	21.1775	20.9627	24.1992	21.552	48.4598
BnaC06g18960D	GSBRNA2G00132123001	chrC06:21314284-21317081	1959	0.586257	32.1937	37.6588	31.8991	43.0522	54.8461	30.3812	35.9904	36.5451	24.8772	70.8995
BnaC06g21690D	GSBRNA2G00143822001	chrC06:23854502-23855042	540	1.24303	5.52077	4.34299	8.88876	16.2286	15.4578	2.95171	6.11871	12.0492	10.2455	4.9468
BnaC06g21970D	GSBRNA2G00143776001	chrC06:24121428-24122509	963	13.222	22.839	14.5482	26.6256	65.4127	31.5857	31.5659	24.623	39.78	47.4152	105.258
BnaC06g22480D	GSBRNA2G00143692001	chrC06:24518086-24519269	1001	20.5393	13.4377	16.6042	12.6168	5.50487	8.85022	14.5507	14.9295	11.0446	8.01096	2.57732
BnaC06g23310D	GSBRNA2G00049043001	chrC06:25225649-25228780	2322	6.79349	9.28531	10.2332	10.172	12.9511	18.1623	8.42316	10.4829	11.4774	12.7008	14.182
BnaC06g23370D	GSBRNA2G00049050001	chrC06:25252072-25257113	3299	0.20409	19.924	22.6771	20.2764	23.6281	29.3801	20.3685	21.4951	24.8411	13.8884	37.1242
BnaC06g23520D	GSBRNA2G00049073001	chrC06:25339784-25344960	1810	8.70055	3.75177	5.83231	7.60298	4.93001	2.23867	8.17633	8.70934	7.41047	5.3826	2.89058
BnaC06g23720D	GSBRNA2G00049104001	chrC06:25484119-25486354	1653	6.64648	9.00292	9.17188	11.4506	22.4166	36.8224	8.98425	10.1546	14.9085	23.9591	39.3948
BnaC06g24480D	GSBRNA2G00022100001	chrC06:26245213-26247077	837	3.01952	8.4265	11.7321	7.84991	11.3537	13.5467	7.32062	10.4435	10.8057	6.68662	12.2694
BnaC06g26190D	GSBRNA2G00117902001	chrC06:27891316-27895515	2670	1.42083	2.13491	3.37269	3.66899	7.86066	1.79132	1.44696	2.27202	4.38129	3.55336	3.72838
BnaC06g26300D	GSBRNA2G00041514001	chrC06:28027991-28029689	1115	27.272	16.2704	20.4016	17.4747	7.18221	4.72468	19.0456	22.0896	25.1995	7.95517	6.02924
BnaC06g27130D	GSBRNA2G00067510001	chrC06:28600095-28603609	1520	0.316903	1.23371	2.30733	1.17189	3.09195	5.12704	1.68043	1.65937	1.4433	0.889442	2.03309
BnaC06g27490D	GSBRNA2G00060115001	chrC06:28788585-28789842	1257	1.93277	7.2647	6.31687	9.12247	16.042	17.1434	4.96731	8.81948	11.0499	11.3503	11.1878
BnaC06g28370D	GSBRNA2G00112943001	chrC06:29585338-29587436	1871	0.818559	8.48519	16.5785	7.18912	17.8193	28.0815	10.7683	12.0214	9.00119	6.6025	17.5101
BnaC06g29240D	GSBRNA2G00113071001	chrC06:30267734-30268808	1074	0.730413	34.7224	37.6577	33.0222	50.5462	46.3017	34.3125	36.9613	41.3131	25.3481	56.3472
BnaC06g31000D	GSBRNA2G00049773001	chrC06:31665762-31667048	1173	0.907348	1.25462	1.22068	1.34192	4.15524	7.17386	0.9941	1.23513	2.37803	2.78712	4.63397
BnaC06g31180D	GSBRNA2G00049744001	chrC06:31811608-31812760	1152	5.54669	10.8113	7.84406	14.8409	27.1571	24.8347	8.29005	13.4749	14.7612	21.506	22.0124
BnaC06g31250D	GSBRNA2G00049736001	chrC06:31826898-31829229	2331	0.68591	1.95985	1.00714	1.42613	3.29715	4.0428	0.71601	2.75049	4.87235	3.27891	0.820833
BnaC06g31750D	GSBRNA2G00049666001	chrC06:32205319-32205690	371	18.1704	722.473	999.999	585.262	840.015	1096.61	934.231	995.175	932.063	321.877	846.951
BnaC06g31880D	GSBRNA2G00049647001	chrC06:32266135-32268279	1717	11.553	14.9101	16.8634	25.9176	33.8704	35.6677	14.36	22.5658	27.3982	34.7405	22.2534
BnaC06g31940D	GSBRNA2G00049638001	chrC06:32312003-32312669	564	17.098	24.5284	21.4602	36.3535	64.6847	83.8201	27.1564	34.9785	54.6501	49.126	55.7082
BnaC06g31950D	GSBRNA2G00049634001	chrC06:32324393-32326110	876	8.84896	27.9455	26.6005	27.828	33.6768	33.8843	24.5177	31.1489	31.5781	23.342	47.0051
BnaC06g32670D	GSBRNA2G00103209001	chrC06:32786064-32788006	1451	8.28246	17.9141	17.5898	23.3134	49.2735	68.6855	20.9654	22.6901	34.2076	47.1902	69.6328
BnaC06g36590D	GSBRNA2G00103705001	chrC06:35060231-35063049	1304	4.36873	6.23737	7.81824	8.62905	18.3919	7.34231	3.44167	4.1543	5.11681	5.80311	12.4991
BnaC06g36880D	GSBRNA2G00103742001	chrC06:35172304-35173301	854	41.2487	50.4874	35.193	55.4284	96.9065	99.8131	44.1397	39.863	70.0888	79.1489	159.811
BnaC06g37510D	GSBRNA2G00147809001	chrC06:35503145-35505533	1314	1.1724	3.53825	2.51236	3.02887	7.68344	6.14529	2.04104	3.23509	7.04282	6.30915	4.08474
BnaC06g37750D	GSBRNA2G00147846001	chrC06:35644119-35644878	759	2.8409	98.2543	101.4	76.246	159.006	203.166	82.8336	107.99	100.73	73.3406	171.69
BnaC06g37960D	GSBRNA2G00147874001	chrC06:35745130-35746977	1847	5.93905	8.81182	9.37618	9.25925	18.8445	7.08942	6.13771	3.73255	5.90551	8.09645	13.6611
BnaC06g38020D	GSBRNA2G00147880001	chrC06:35785837-35790110	2327	1.99154	3.3237	4.07937	3.60348	3.97609	5.86094	3.92961	4.14352	4.2115	3.28731	6.58407
BnaC06g38300D	GSBRNA2G00147913001	chrC06:35923407-35926713	2685	9.36331	12.963	12.2902	16.9882	42.0527	27.1016	7.98434	10.0312	19.6662	17.3809	9.79254
BnaC06g40000D	GSBRNA2G00148118001	chrC06:36863231-36864073	842	6.21044	14.1744	16.6801	14.1644	18.7978	19.215	12.0564	20.6475	21.0527	13.547	14.371
BnaC06g40170D	GSBRNA2G00148137001	chrC06:36908724-36910577	1173	5.72655	23.4235	10.0721	24.0064	52.2402	59.7134	6.31494	21.9293	47.2014	66.1815	23.4728
BnaC06g43540D	GSBRNA2G00017189001	chrC06_random:2960187-2963969	1954	6.58035	9.9759	10.4344	15.8888	21.1444	19.4342	8.69135	17.6141	15.8501	17.232	10.9563
BnaC06g43940D	GSBRNA2G00081462001	chrC06_random:3312288-3313185	803	2.61631	16.0289	15.4541	25.893	52.6045	60.2676	11.776	24.6175	39.0226	33.2797	29.4658
BnaC07g02460D	GSBRNA2G00137826001	chrC07:3143863-3145102	1239	12.7806	12.4697	11.1457	9.65506	2.175	3.83522	9.3289	10.6673	11.5821	3.98474	0.791352
BnaC07g03950D	GSBRNA2G00084060001	chrC07:5328028-5332040	1580	8.84525	7.60293	8.85812	5.76032	2.04842	5.11237	4.30577	4.40003	4.81789	8.16502	1.28675
BnaC07g05090D	GSBRNA2G00144813001	chrC07:8124938-8127124	1949	1.74985	2.20688	2.16903	5.4938	14.9706	7.37779	1.65037	4.07347	4.72154	3.85987	1.74687
BnaC07g08430D	GSBRNA2G00142513001	chrC07:13365952-13366512	560	9.30252	21.0392	15.9196	25.76	52.0579	75.1792	16.853	28.9969	39.4057	54.6972	65.312
BnaC07g09400D	GSBRNA2G00105568001	chrC07:14697797-14698601	804	64.7931	103.056	66.0021	48.8928	30.4671	23.8743	50.6099	92.9439	58.3374	41.2315	18.0168
BnaC07g11270D	GSBRNA2G00117390001	chrC07:16942829-16945848	2063	6.22076	6.51339	7.23625	8.02866	16.0068	11.9073	6.25128	7.63755	8.12681	8.82455	7.27114
BnaC07g14830D	GSBRNA2G00076628001	chrC07:20753503-20754587	1084	13.4859	18.6049	17.6273	29.5581	37.032	43.3846	10.3986	14.7987	32.5926	45.5938	21.4554
BnaC07g16820D	GSBRNA2G00046212001	chrC07:22867137-22870547	2262	1.3581	3.63689	2.56184	5.30389	5.42075	5.00437	2.82076	3.35168	7.84456	6.75796	3.07986
BnaC07g17400D	GSBRNA2G00158141001	chrC07:23625024-23628223	2452	3.97168	3.95852	5.93943	5.88666	9.57765	9.99297	4.6679	3.89237	6.86433	10.7844	11.6365
BnaC07g18740D	GSBRNA2G00128546001	chrC07:25406272-25407506	896	3.30723	267.453	239.742	210.687	326.04	350.133	192.699	229.751	222.848	158.238	363.959
BnaC07g19810D	GSBRNA2G00128737001	chrC07:26565125-26566118	789	1.01043	62.6245	54.9393	50.0062	85.8821	102.644	54.3407	62.5976	67.7646	39.6008	120.748
BnaC07g20290D	GSBRNA2G00128813001	chrC07:26975422-26977948	1600	16.9166	55.6705	52.5397	47.145	72.9354	82.3697	52.286	60.2914	60.161	44.6414	85.984
BnaC07g21450D	GSBRNA2G00115423001	chrC07:28107864-28109599	1399	2.37582	6.36144	6.28273	5.72247	8.14865	8.85117	6.19917	6.94398	6.41569	5.06569	8.51307
BnaC07g21510D	GSBRNA2G00115416001	chrC07:28165275-28166217	611	10.4658	17.3856	23.1719	21.8357	46.4828	12.0453	18.3399	16.4621	17.1813	23.5858	29.3569
BnaC07g21980D	GSBRNA2G00115350001	chrC07:28500558-28504204	1778	4.72117	7.14329	7.41799	7.70269	10.2978	12.7613	7.76683	6.56467	7.55191	9.37378	11.1084
BnaC07g22030D	GSBRNA2G00115339001	chrC07:28550782-28553655	2173	21.2665	76.6022	80.3387	68.9604	95.92	117.253	73.1204	79.4436	83.8788	64.9486	125.042
BnaC07g22090D	GSBRNA2G00115328001	chrC07:28598121-28600488	1845	4.71145	6.81187	6.48647	7.30183	14.6923	25.209	6.74835	6.37163	13.0236	17.8193	29.8031
BnaC07g23090D	GSBRNA2G00139222001	chrC07:29738806-29741086	1125	17.7509	29.607	28.1793	29.7246	41.2304	49.126	26.4868	28.9869	31.3853	33.4332	46.37
BnaC07g24080D	GSBRNA2G00139365001	chrC07:30476858-30479286	1264	12.8724	20.7157	17.4406	22.112	44.3247	66.767	18.3637	23.5425	33.3535	47.7918	80.0582
BnaC07g25020D	GSBRNA2G00142799001	chrC07:31193613-31194705	1092	6.64359	10.1934	11.4472	17.3287	27.6982	26.0126	7.47033	15.6529	16.7952	21.6969	13.8912
BnaC07g25300D	GSBRNA2G00142849001	chrC07:31457934-31459374	1164	6.28887	235.015	256.939	185.765	391.899	472.072	256.798	279.065	275.639	228.018	496.854
BnaC07g25330D	GSBRNA2G00142853001	chrC07:31475071-31477711	2096	2.75545	14.5611	46.0094	15.3179	34.5584	67.3525	17.4779	22.545	14.9069	9.52682	24.0351
BnaC07g26010D	GSBRNA2G00142946001	chrC07:32070270-32072697	1718	10.3739	9.76774	8.02455	6.85219	3.42821	4.71009	5.69813	7.43599	7.18283	5.1364	2.55072
BnaC07g27160D	GSBRNA2G00143088001	chrC07:32759180-32763739	2770	14.3093	0.291918	0.141115	0.220467	0.047748	0.0676463	0.972073	0.164069	0.070651	3.71423	0.184263
BnaC07g27480D	GSBRNA2G00091526001	chrC07:32987070-32988476	1191	0.953914	76.1788	71.0666	66.061	81.4717	91.0391	65.8102	80.4585	83.5538	45.3744	106.956
BnaC07g28310D	GSBRNA2G00133749001	chrC07:33479806-33482229	2037	0.420018	11.786	19.6797	8.62287	27.7616	47.1535	13.9317	15.0358	12.8724	11.4032	30.5064
BnaC07g28380D	GSBRNA2G00133735001	chrC07:33525598-33531418	3168	0.141936	3.13427	4.2196	3.13475	4.69526	6.54849	4.03325	4.12844	4.19624	2.79673	7.06577
BnaC07g29340D	GSBRNA2G00133614001	chrC07:34137045-34140090	2133	0.227389	7.77559	8.11375	6.81104	10.5871	12.2758	7.26421	7.61864	8.87234	6.1657	13.6574
BnaC07g30310D	GSBRNA2G00133481001	chrC07:34854462-34855444	683	3.36042	221.715	212.95	188.557	278.631	267.574	195.726	236.179	245.739	129.523	356.896
BnaC07g30390D	GSBRNA2G00133471001	chrC07:34889866-34891235	855	9.97627	9.65383	12.6411	12.4796	19.4229	28.1258	7.97347	10.997	13.5417	23.6737	22.7701
BnaC07g33060D	GSBRNA2G00031454001	chrC07:36390301-36396061	3188	5.83422	46.0424	53.1047	42.713	59.5913	75.5034	44.5207	46.8883	49.8569	39.1449	85.3356
BnaC07g35070D	GSBRNA2G00112540001	chrC07:37591113-37592081	618	46.174	46.3421	47.6724	47.3213	106.462	125.787	38.7035	46.3679	64.3548	115.34	180.476
BnaC07g36660D	GSBRNA2G00156918001	chrC07:38634414-38637827	2523	0.948026	60.6386	59.4491	54.1562	88.3422	100.649	57.0027	62.9595	67.1256	52.1057	126.072
BnaC07g36670D	GSBRNA2G00156919001	chrC07:38642450-38646115	2400	3.48113	79.4623	79.3089	68.1526	94.0002	115.059	70.7973	80.3259	84.2466	61.6689	147.857
BnaC07g36760D	GSBRNA2G00156932001	chrC07:38704270-38704737	467	39.8914	31.1735	35.8977	24.3929	8.11136	10.5417	26.9931	34.8813	38.2716	10.5012	66.0141
BnaC07g38360D	GSBRNA2G00157138001	chrC07:39674199-39676975	1691	0.315252	3.49562	6.2677	1.56687	10.2557	19.4013	4.25209	4.99298	4.09645	2.06009	3.75115
BnaC07g40160D	GSBRNA2G00154580001	chrC07:40688287-40691192	1285	24.1404	76.4802	63.4964	65.8993	57.285	91.0116	55.5237	62.1327	82.5355	46.6898	77.8233
BnaC07g41150D	GSBRNA2G00154693001	chrC07:41127461-41131252	2115	0.515691	2.1683	2.82056	2.28337	3.13201	4.63715	2.3511	2.46666	2.7223	1.61815	2.37267
BnaC07g42500D	GSBRNA2G00099688001	chrC07:41922784-41924191	1114	17.833	11.3948	9.17632	6.44953	5.09687	4.95188	5.41101	9.23229	9.42698	5.46528	2.87584
BnaC07g42640D	GSBRNA2G00099706001	chrC07:42041241-42042716	1475	22.4963	32.0772	33.0639	43.6797	79.2026	97.7711	27.3972	38.3734	47.651	64.7691	49.0275
BnaC07g43490D	GSBRNA2G00099817001	chrC07:42526219-42527527	1028	4.90584	6.89753	8.71359	12.9332	31.0262	30.2046	5.51098	10.4093	25.0515	28.2933	15.0634
BnaC07g44740D	GSBRNA2G00099964001	chrC07:43145605-43147815	1084	32.3122	39.4798	45.7051	51.6053	77.3674	82.8775	37.9417	51.6637	60.6438	87.959	81.6428
BnaC07g45340D	GSBRNA2G00100044001	chrC07:43470227-43474640	3013	2.40905	120.593	120.734	105.205	166.609	201.581	112.268	117.156	134.406	91.2532	217.739
BnaC07g45430D	GSBRNA2G00100055001	chrC07:43513132-43516657	1124	83.9146	132.819	94.5003	77.8236	25.9892	33.7724	50.5452	78.6715	71.86	20.6246	2.61222
BnaC07g45470D	GSBRNA2G00100059001	chrC07:43528788-43530787	1662	0.545823	25.4891	23.657	20.7483	34.3609	40.6577	23.9802	24.3297	27.5314	16.9203	44.1927
BnaC07g45620D	GSBRNA2G00100077001	chrC07:43603020-43603593	573	14.9099	24.3057	16.8536	22.2432	41.7781	47.6281	22.888	24.0076	29.6649	36.8447	40.9929
BnaC07g45900D	GSBRNA2G00100106001	chrC07:43721409-43725880	1857	1.80011	3.91942	2.79789	4.42754	16.3607	24.0793	3.4926	4.36023	10.1403	14.8229	24.5239
BnaC07g46910D	GSBRNA2G00100243001	chrC07:44433888-44436052	1512	18.9405	15.503	11.8506	10.814	1.6711	3.59067	1.75089	9.929	15.1111	3.06496	0.857428
BnaC07g47260D	GSBRNA2G00100296001	chrC07:44578855-44580583	1381	19.3013	28.5427	30.3187	37.0418	85.422	27.5394	25.6731	19.0827	22.508	33.1046	76.2441
BnaC07g47300D	GSBRNA2G00100301001	chrC07:44591927-44595165	2481	0.744389	4.58174	6.11398	4.87749	3.25842	5.42916	4.77005	4.64708	5.3071	4.22453	11.1133
BnaC07g47390D	GSBRNA2G00100311001	chrC07:44623201-44625811	2568	0.846038	27.9206	32.7576	24.4516	41.5959	46.597	30.4203	31.1094	32.9917	21.5411	49.138
BnaC07g47480D	GSBRNA2G00100324001	chrC07:44673928-44675502	963	10.6729	6.93796	8.11565	5.42903	2.39806	2.67351	5.60423	8.21499	5.00173	6.4428	2.23579
BnaC07g48760D	GSBRNA2G00022297001	chrC07_random:1402795-1404036	1241	2.95964	5.361	5.07825	7.62168	11.6188	11.3883	5.00546	6.59921	9.3953	10.2371	4.7218
BnaC07g49180D	GSBRNA2G00014247001	chrC07_random:1794300-1796090	1491	5.14827	223.985	219.81	194.541	392.547	445.604	198.869	221.464	235.733	191.578	458.013
BnaC07g49750D	GSBRNA2G00034574001	chrC07_random:2175682-2177797	1706	2.03604	5.42096	4.59653	11.1276	11.9749	15.7584	3.8192	8.7855	14.3331	8.81992	8.38118
BnaC07g49810D	GSBRNA2G00025015001	chrC07_random:2209614-2216181	4100	0.360181	1.27463	1.76581	1.32552	2.15326	1.92466	1.41955	1.49316	1.68111	1.15389	2.64311
BnaC08g00120D	GSBRNA2G00145376001	chrC08:49305-53872	3036	1.41801	7.27092	7.72016	6.19255	8.72147	12.1997	6.50921	7.62869	8.09849	5.35891	11.3095
BnaC08g01080D	GSBRNA2G00145241001	chrC08:745976-751630	2373	1.57827	6.36184	5.82936	5.18975	6.04229	6.70129	5.63039	6.2803	7.13061	4.10003	8.67009
BnaC08g01520D	GSBRNA2G00145168001	chrC08:1194668-1197423	1626	0.379874	14.222	15.57	12.485	19.3289	24.8714	13.2746	15.8639	17.117	11.3683	28.1874
BnaC08g01580D	GSBRNA2G00145161001	chrC08:1220457-1225549	2994	0.303122	3.5773	3.76439	3.5626	4.42198	5.31441	3.94401	3.23524	4.15473	2.46563	6.326
BnaC08g01920D	GSBRNA2G00145118001	chrC08:1378103-1380948	1611	17.2006	31.0406	33.64	30.8052	33.9483	40.2433	31.154	36.8893	37.5406	25.8583	43.6666
BnaC08g03520D	GSBRNA2G00128048001	chrC08:3316297-3317457	699	0.950659	56.3474	46.2482	51.0464	88.8046	104.328	54.5353	63.5908	68.3112	50.1222	115.537
BnaC08g03920D	GSBRNA2G00128143001	chrC08:4093752-4094286	534	4.82697	232.435	180.899	185.367	298.193	294.195	160.888	221.372	219.042	143.611	361.82
BnaC08g05510D	GSBRNA2G00133996001	chrC08:7393684-7395545	1335	0.79205	40.9001	46.9691	40.7433	79.8555	94.7212	51.0407	52.4791	57.1804	38.9379	100.781
BnaC08g06180D	GSBRNA2G00153186001	chrC08:8693343-8694262	849	1.04204	19.8366	18.6145	15.1053	24.3373	26.0006	17.153	19.7252	22.3086	11.0411	34.297
BnaC08g07580D	GSBRNA2G00139997001	chrC08:10747018-10748791	1590	2.40223	5.16623	4.26352	8.35698	10.2289	8.39492	4.44639	7.53504	10.1292	10.5182	8.98262
BnaC08g08210D	GSBRNA2G00061593001	chrC08:12194225-12196714	1350	10.7891	19.0301	18.5562	29.1933	75.2873	23.2248	34.6315	26.408	24.6919	43.5007	99.6442
BnaC08g13980D	GSBRNA2G00012845001	chrC08:18962419-18965784	2466	20.2898	26.288	23.4637	27.2144	67.7023	117.163	25.5039	22.7105	43.6679	75.6839	130.346
BnaC08g14510D	GSBRNA2G00012779001	chrC08:19262328-19264900	1803	22.699	15.0847	17.5984	12.9251	8.01384	14.3389	16.5302	15.6188	13.0832	10.7373	4.59908
BnaC08g16080D	GSBRNA2G00139858001	chrC08:20257415-20259058	1188	6.06109	26.3047	28.4388	26.0763	37.4	40.3973	25.7409	31.4851	31.549	26.1026	46.5896
BnaC08g17460D	GSBRNA2G00139673001	chrC08:21083998-21084778	780	16.356	18.8691	18.2335	23.9696	40.8511	44.0767	19.5949	26.5659	31.6428	41.5964	36.5635
BnaC08g17850D	GSBRNA2G00139622001	chrC08:21295136-21295837	701	10.5436	12.4767	15.5644	20.0188	36.4537	16.0311	14.5502	20.2851	19.5044	18.2765	15.8523
BnaC08g17880D	GSBRNA2G00139619001	chrC08:21320781-21322083	1058	0.576139	6.26002	7.48624	7.96497	7.12249	8.63294	6.43694	9.16062	12.1561	5.52899	8.82439
BnaC08g18580D	GSBRNA2G00139534001	chrC08:21678867-21682369	2604	0.59658	3.26436	3.83546	3.20775	4.85211	5.84487	3.80813	3.69981	4.36162	2.396	5.29509
BnaC08g18640D	GSBRNA2G00139525001	chrC08:21708922-21710629	1194	3.00595	7.64756	4.37829	6.93292	7.14437	11.856	5.89352	4.09458	8.80065	6.00601	8.76022
BnaC08g19730D	GSBRNA2G00055044001	chrC08:22561391-22565482	3027	3.06621	4.33313	4.77258	5.62231	13.0952	19.7049	3.12061	4.25852	6.68885	12.3095	10.6845
BnaC08g20810D	GSBRNA2G00121706001	chrC08:23415999-23421543	1062	7.76741	12.9059	12.3617	12.4917	28.3341	9.4346	12.5285	11.7656	11.2557	14.9277	15.2718
BnaC08g20840D	GSBRNA2G00121709001	chrC08:23451017-23453068	1496	0.410529	3.2351	6.8321	3.67732	8.75978	16.5017	4.62857	5.08315	4.42801	2.49451	4.93301
BnaC08g21160D	GSBRNA2G00121760001	chrC08:23748038-23750373	1877	11.5193	17.3266	15.0958	23.7302	35.0515	30.9702	15.2818	19.413	21.6125	33.0789	30.1738
BnaC08g21170D	GSBRNA2G00121761001	chrC08:23753409-23754167	663	12.7221	571.749	493.517	484.761	734.553	834.857	406.24	568.571	636.801	350.241	906.952
BnaC08g21320D	GSBRNA2G00121783001	chrC08:23934069-23936022	1283	57.1957	71.3088	71.3076	89.2858	193.526	234.605	70.8187	94.0997	118.838	176.678	246.307
BnaC08g22570D	GSBRNA2G00109355001	chrC08:25215897-25220432	3226	3.61849	11.1491	13.8887	10.6616	13.5279	18.5908	12.1163	11.5431	13.9278	10.0508	21.356
BnaC08g22640D	GSBRNA2G00109344001	chrC08:25256650-25258376	1260	23.5957	29.3328	32.9165	29.4606	64.0848	28.9021	19.3152	18.7917	19.4839	27.4808	45.2901
BnaC08g22920D	GSBRNA2G00109309001	chrC08:25397464-25398313	748	32.1313	41.5174	41.4524	50.5018	105.853	69.0788	49.3196	57.3841	60.6045	76.4724	165.168
BnaC08g24010D	GSBRNA2G00109160001	chrC08:26138915-26140208	1251	13.7399	27.4844	28.0696	39.268	61.6075	78.9379	29.1226	43.7998	50.8131	58.0583	57.7539
BnaC08g24040D	GSBRNA2G00109156001	chrC08:26149748-26153722	2080	22.8909	5.69036	16.4017	24.2358	15.6963	43.833	4.84597	21.96	7.72069	22.7826	18.0577
BnaC08g25010D	GSBRNA2G00109018001	chrC08:26922444-26924540	1170	3.62568	9.33862	4.4903	6.98642	12.5254	12.0159	6.29739	6.27248	14.5609	16.6169	16.4944
BnaC08g25500D	GSBRNA2G00108958001	chrC08:27185790-27187728	1636	1.89135	4.49573	5.62246	4.80219	5.85165	6.11652	5.2413	5.63538	4.39424	3.76347	8.34886
BnaC08g25550D	GSBRNA2G00108951001	chrC08:27233984-27238109	2534	1.10229	53.016	45.1952	47.8241	74.8977	84.0978	44.6807	45.7741	43.907	40.8781	99.1933
BnaC08g26190D	GSBRNA2G00072661001	chrC08:27679740-27681378	822	16.7065	30.2539	30.5604	29.2412	37.9268	44.4595	28.1558	37.0527	30.2862	26.3273	42.5275
BnaC08g26910D	GSBRNA2G00156011001	chrC08:28128341-28130632	2291	36.3975	80.2215	75.5032	116.796	136.884	144.247	68.7115	102.942	129.568	144.645	51.1653
BnaC08g27250D	GSBRNA2G00155973001	chrC08:28323932-28324907	643	17.363	14.473	13.2205	8.15508	11.3091	3.98202	13.8459	10.6134	5.31824	15.976	11.4398
BnaC08g27710D	GSBRNA2G00155905001	chrC08:28611161-28612025	864	2.88325	11.4124	10.0267	18.4787	19.5528	18.0726	9.22923	18.1073	26.5327	16.4339	8.13741
BnaC08g32060D	GSBRNA2G00127081001	chrC08:31234992-31235643	651	1.02257	46.2887	38.994	38.7426	52.8953	56.3807	37.9555	49.8163	55.4252	26.0962	66.0389
BnaC08g32350D	GSBRNA2G00127121001	chrC08:31318388-31318727	339	3.87579	85.3085	67.3523	78.8002	130.926	164.309	73.5769	85.9148	89.3345	66.2257	160.538
BnaC08g32370D	GSBRNA2G00127123001	chrC08:31333800-31336727	2490	4.31573	9.18001	10.0372	8.87535	17.3743	15.8456	10.8079	10.4864	11.2447	8.79835	19.3838
BnaC08g32450D	GSBRNA2G00127132001	chrC08:31389722-31392718	1746	14.2188	12.3892	9.52129	8.87854	3.45775	7.55952	6.05541	10.2856	10.993	5.16915	1.6574
BnaC08g32840D	GSBRNA2G00127182001	chrC08:31616323-31618400	1602	0.448726	2.35421	0.755341	2.7803	4.38386	1.94788	0.482653	0.853966	2.13871	3.31566	0.652281
BnaC08g32950D	GSBRNA2G00127193001	chrC08:31662579-31671855	3813	0.280894	3.41009	3.10356	2.97358	4.81605	6.30466	3.85784	3.84966	3.91613	2.71278	6.93056
BnaC08g34050D	GSBRNA2G00127322001	chrC08:32282738-32285617	1250	10.8453	14.6184	7.49684	6.16666	3.4457	5.52619	4.03063	7.30283	8.2257	4.12275	0.289273
BnaC08g35020D	GSBRNA2G00127441001	chrC08:33049370-33050670	1300	32.9313	56.2706	46.7844	69.7304	89.9769	79.925	38.5588	60.6432	79.6019	74.3347	47.1973
BnaC08g35620D	GSBRNA2G00137022001	chrC08:33369987-33372420	1344	3.00712	8.22552	8.03256	15.8486	42.8611	77.7653	9.42556	13.4422	29.5719	40.933	84.6951
BnaC08g35830D	GSBRNA2G00136998001	chrC08:33460662-33462091	860	34.453	26.6662	25.9841	22.2887	17.5805	11.3978	20.6198	26.5342	18.4121	33.7536	10.5941
BnaC08g36500D	GSBRNA2G00136918001	chrC08:33750555-33753773	1973	5.64113	64.9145	58.3506	59.2207	80.1257	89.1824	60.2612	69.4505	77.256	46.4721	109.333
BnaC08g36840D	GSBRNA2G00136878001	chrC08:33903716-33907885	1655	2.48576	5.93545	4.42614	9.60084	12.6302	16.4448	5.08645	8.46429	17.6476	11.8209	5.17541
BnaC08g37340D	GSBRNA2G00136814001	chrC08:34189335-34190189	540	42.8308	41.4751	34.5084	31.9944	12.9475	37.9973	25.8168	28.9977	26.5554	11.9095	1.17176
BnaC08g39210D	GSBRNA2G00136602001	chrC08:35026954-35027989	615	5.56362	9.38493	8.40215	12.4559	21.5429	10.6489	7.252	9.66512	15.3835	13.0001	8.84405
BnaC08g40000D	GSBRNA2G00090546001	chrC08:35413816-35416638	1846	0.405078	42.4325	38.2071	37.0924	36.6552	44.2927	38.4913	44.0583	50.8193	21.246	53.6108
BnaC08g41730D	GSBRNA2G00057066001	chrC08:36220375-36222133	1125	8.55832	20.6444	21.9587	18.8611	28.0583	26.7014	24.3722	25.1261	21.0936	16.0661	24.2244
BnaC08g41800D	GSBRNA2G00057073001	chrC08:36237022-36237743	721	58.1842	66.4303	72.2437	88.1081	156.933	79.2709	82.0785	70.3909	76.2311	96.0629	193.423
BnaC08g41880D	GSBRNA2G00057082001	chrC08:36260198-36260615	417	3.13189	128.428	110.57	98.0092	201.91	281.742	118.22	151.822	139.526	92.8886	267.775
BnaC08g42830D	GSBRNA2G00019319001	chrC08:36850906-36852118	1155	76.8113	110.462	98.5434	153.018	290.643	343.706	91.1689	147.632	188.443	246.053	316.063
BnaC08g45980D	GSBRNA2G00064043001	chrC08:38346551-38348225	1314	0.964319	2.34312	2.03991	1.67947	4.97412	6.39016	1.85016	2.47077	3.11717	1.07905	3.5547
BnaC08g46010D	GSBRNA2G00064046001	chrC08:38353499-38355951	1431	8.02425	13.3802	16.5357	15.5925	13.8589	19.8516	14.0063	15.5153	21.7141	11.7543	21.4695
BnaC08g46130D	GSBRNA2G00064062001	chrC08:38472004-38473852	1698	3.37031	4.37449	3.95635	4.13811	10.2228	5.24118	3.48694	2.13167	2.77974	3.50019	9.54916
BnaC08g46150D	GSBRNA2G00017233001	chrC08_random:50570-52783	1438	3.94054	6.99068	1.27685	21.3628	10.3158	16.4738	6.99423	11.1012	6.29207	8.422	16.8904
BnaC08g46700D	GSBRNA2G00048010001	chrC08_random:945064-946978	1628	6.48139	23.8285	26.5323	24.9507	31.0363	35.7635	24.4093	27.8135	27.2643	21.1638	42.053
BnaC08g46740D	GSBRNA2G00087775001	chrC08_random:978693-980285	1058	9.1867	12.0309	10.4257	15.6396	36.1629	46.8584	9.31855	11.997	20.9704	30.3899	50.8243
BnaC08g48010D	GSBRNA2G00097598001	chrC08_random:2963712-2964057	345	3.20947	93.7136	109.136	73.2668	242.164	287.818	152.129	129.571	91.1059	84.2206	222.159
BnaC08g48340D	GSBRNA2G00020988001	chrC08_random:3305684-3306622	725	9.39457	15.3225	11.7955	22.56	39.5573	32.484	12.1914	19.5045	22.1791	40.8626	26.8597
BnaC08g48860D	GSBRNA2G00022277001	chrC08_random:3821475-3823662	1791	1.89578	4.92318	2.94089	4.83682	9.52072	15.8022	2.98225	3.71372	9.61441	6.53308	11.024
BnaC08g49480D	GSBRNA2G00025437001	chrC08_random:4224862-4226008	1146	6.87185	13.4457	11.3379	18.7785	23.3723	33.4589	11.0844	20.2336	32.7333	23.7318	11.7536
BnaC08g50100D	GSBRNA2G00025694001	chrC08_random:4485976-4489932	2916	0.313944	23.1075	25.4949	20.4712	34.5425	46.0393	27.4754	27.808	30.5418	20.6794	50.6978
BnaC08g50140D	GSBRNA2G00025698001	chrC08_random:4498766-4500967	1782	0.791824	40.5439	33.275	35.4932	51.2444	54.2917	33.415	38.9632	41.6319	25.419	66.5195
BnaC09g00100D	GSBRNA2G00018226001	chrC09:55457-58259	1800	0.337965	16.3036	21.2049	16.1717	20.431	27.6198	16.2495	18.396	13.2624	12.848	29.321
BnaC09g00590D	GSBRNA2G00018283001	chrC09:293783-294242	459	2.69566	161.199	153.397	145.552	173.707	230.78	143.198	171.8	102.945	101.462	258.845
BnaC09g01160D	GSBRNA2G00109705001	chrC09:691230-692002	624	119.789	164.9	112.006	99.5016	48.4619	35.1195	196.132	163.557	122.795	53.7891	82.3813
BnaC09g01520D	GSBRNA2G00109662001	chrC09:834349-835666	1082	61.2929	75.5013	68.2465	49.9719	29.6034	20.1583	53.1641	70.4612	43.9021	51.8965	35.9575
BnaC09g03330D	GSBRNA2G00109435001	chrC09:1878892-1881342	2034	0.388037	9.42501	21.8984	6.52516	19.6802	43.1716	9.62017	14.935	14.2227	5.72171	13.2443
BnaC09g03550D	GSBRNA2G00145925001	chrC09:2044062-2044893	756	1.7887	111.448	100.92	87.7641	148.588	149.245	95.6436	117.699	119.972	67.6075	160.273
BnaC09g03610D	GSBRNA2G00145932001	chrC09:2060734-2060962	228	43.6515	1421.26	788.204	1150.2	2438.84	2587.2	1070.65	1261.57	1325.07	1099	3038.63
BnaC09g04500D	GSBRNA2G00146043001	chrC09:2573612-2575815	2124	2.14804	25.8752	27.8191	22.2798	30.5678	35.0948	25.2298	27.8968	29.4015	17.2359	43.2692
BnaC09g04570D	GSBRNA2G00146055001	chrC09:2623180-2624335	955	0.866992	24.5085	24.4015	20.0797	34.6929	41.5757	27.9638	28.6203	30.3079	18.4505	41.7829
BnaC09g04640D	GSBRNA2G00146068001	chrC09:2689282-2690230	873	16.8505	20.7879	12.7874	16.6138	33.1697	45.6623	11.8076	16.9535	20.3181	30.3157	43.0989
BnaC09g04840D	GSBRNA2G00146091001	chrC09:2798442-2799450	1008	77.997	51.7772	52.111	35.6101	25.9013	25.8011	37.0347	48.0106	33.9262	34.6528	5.85021
BnaC09g06210D	GSBRNA2G00134676001	chrC09:3749932-3751008	896	10.0996	14.4238	10.1749	9.73826	1.394	1.77203	7.75876	14.8438	11.1993	1.39167	1.70607
BnaC09g06650D	GSBRNA2G00134749001	chrC09:4089007-4091216	1232	0.736782	41.1382	44.3891	38.4892	58.4928	73.2948	35.3341	38.5221	41.1271	34.4858	79.2352
BnaC09g06860D	GSBRNA2G00134786001	chrC09:4246164-4246602	438	4.3657	16.3076	10.8666	25.0429	56.009	55.1218	8.52489	21.537	33.8192	49.9353	43.4943
BnaC09g08530D	GSBRNA2G00135025001	chrC09:5424420-5425647	1227	0.588701	18.3446	19.1117	18.9188	23.3898	29.9071	18.044	21.3386	21.3345	14.2318	35.2543
BnaC09g08620D	GSBRNA2G00135036001	chrC09:5495764-5507132	5799	0.100268	2.28988	3.80883	2.40111	3.55126	5.04163	2.47649	2.66293	2.76638	1.70183	3.77637
BnaC09g09390D	GSBRNA2G00035758001	chrC09:6095044-6097337	1500	1.12304	35.6622	37.0034	31.7475	58.472	62.4355	32.8201	35.2015	36.6503	30.5377	70.6746
BnaC09g10140D	GSBRNA2G00115928001	chrC09:6753820-6756780	1085	20.1207	18.5516	10.0872	8.09438	2.65505	11.8141	15.6644	9.46686	15.5843	9.81432	0.623249
BnaC09g10360D	GSBRNA2G00115898001	chrC09:6980026-6985284	2991	3.60254	7.35808	8.60906	6.9094	8.14012	12.458	9.20805	7.45575	8.87895	7.5567	10.9727
BnaC09g10680D	GSBRNA2G00115842001	chrC09:7208456-7209890	1334	21.726	15.2523	13.733	9.24263	5.17957	7.18619	11.1982	12.8024	12.0878	7.19315	4.27916
BnaC09g11080D	GSBRNA2G00084186001	chrC09:7702918-7704165	1247	1.35859	1.48975	1.03119	1.9163	6.7512	3.93813	1.81838	1.49183	5.43465	5.75634	14.828
BnaC09g11350D	GSBRNA2G00032750001	chrC09:7924402-7925738	975	5.64793	5.67072	7.74223	10.7072	19.5106	22.7123	5.99934	11.0844	12.2929	22.8948	30.7174
BnaC09g11360D	GSBRNA2G00032751001	chrC09:7929484-7936144	3491	1.72539	7.35262	9.16679	8.03981	9.32545	11.8881	8.38897	8.23671	8.99264	6.85286	14.9094
BnaC09g15570D	GSBRNA2G00042034001	chrC09:12390261-12391530	1269	0.798784	26.281	33.9306	23.7405	53.7706	56.7108	36.5555	32.2143	32.1627	24.1215	58.284
BnaC09g16820D	GSBRNA2G00100773001	chrC09:13623919-13624524	605	1.73135	3.91703	4.20413	11.6179	18.9606	15.6002	5.03998	6.69383	10.3059	12.0296	11.7148
BnaC09g19870D	GSBRNA2G00115620001	chrC09:16962480-16963464	984	0.912441	31.5149	37.169	28.2778	35.4785	46.2773	31.5802	39.4898	41.6912	20.4558	47.2829
BnaC09g21050D	GSBRNA2G00095567001	chrC09:18347822-18349647	1474	0.72121	30.1069	34.5605	26.879	53.3916	63.2882	31.51	34.0409	37.2398	25.5171	65.521
BnaC09g21800D	GSBRNA2G00067347001	chrC09:19037872-19040199	1639	1.03423	12.2351	9.43684	8.05471	13.8095	16.7075	9.15192	10.4593	11.3739	7.79203	16.9188
BnaC09g22170D	GSBRNA2G00053804001	chrC09:19459400-19462525	1331	3.1468	213.1	197.673	189.177	199.844	220.202	193.631	235.543	271.943	112.455	273.783
BnaC09g24050D	GSBRNA2G00071173001	chrC09:21919281-21921373	1816	3.27601	8.84474	6.89136	15.3162	10.1733	10.5856	6.40293	8.78907	15.6496	14.4574	5.32004
BnaC09g26890D	GSBRNA2G00152260001	chrC09:28175232-28176553	687	2.98714	3.62616	1.76873	15.9611	16.4344	26.6548	11.6469	18.4691	6.485	15.2231	19.7175
BnaC09g27860D	GSBRNA2G00108748001	chrC09:29720452-29724016	1766	1.35629	2.82291	3.15465	2.78701	3.02007	6.63729	2.0444	2.57775	3.43001	3.99588	5.05754
BnaC09g28100D	GSBRNA2G00108700001	chrC09:30227722-30230050	2328	1.3373	2.46113	2.47408	2.27999	5.68654	1.92359	2.76556	1.62542	1.78782	2.84721	5.08948
BnaC09g29270D	GSBRNA2G00009381001	chrC09:31848178-31849135	735	3.25796	2.88124	1.91225	11.6086	15.8437	25.409	6.59511	15.3915	3.91875	13.3703	26.7713
BnaC09g30100D	GSBRNA2G00010144001	chrC09:32879994-32881159	567	3.74722	5.16094	2.26681	22.549	28.6267	40.928	18.2101	26.163	6.34975	26.9222	35.5036
BnaC09g30110D	GSBRNA2G00010143001	chrC09:32881286-32882230	944	105.592	139.916	75.2672	831.642	1094.91	1579.92	607.776	908.805	152.661	889.251	1488.33
BnaC09g30560D	GSBRNA2G00002874001	chrC09:33549819-33554104	1343	30.4875	32.9912	29.0125	17.7355	9.86766	8.7652	7.7386	17.6981	18.2909	8.86496	4.3789
BnaC09g30620D	GSBRNA2G00002882001	chrC09:33617543-33619008	937	9.32866	18.3238	16.1929	12.04	19.9074	27.8547	13.0885	18.6625	18.5427	12.9457	19.5824
BnaC09g32640D	GSBRNA2G00033361001	chrC09:35796726-35798212	1335	26.0997	20.8587	19.8075	12.5455	7.94992	11.1572	10.0051	18.0648	14.9314	14.0491	2.52195
BnaC09g33280D	GSBRNA2G00053011001	chrC09:36436819-36439515	1276	2.3625	9.95028	13.031	10.0791	17.0759	18.6668	10.8576	12.6764	11.5676	8.96062	18.1055
BnaC09g33580D	GSBRNA2G00077447001	chrC09:36872443-36876313	2384	2.94966	22.6709	31.6694	18.6437	41.5994	53.2193	26.0908	28.5492	27.0528	16.2801	33.1408
BnaC09g33860D	GSBRNA2G00077402001	chrC09:37083475-37085647	1807	12.3707	18.4927	21.7562	18.0547	27.761	33.8736	21.3879	22.9806	20.0032	21.665	35.5893
BnaC09g35160D	GSBRNA2G00133177001	chrC09:38588255-38588781	526	12.096	26.0101	24.4922	41.9294	72.7842	60.5256	21.3936	48.8561	44.6415	60.6175	48.549
BnaC09g36590D	GSBRNA2G00094437001	chrC09:39939723-39942180	1765	20.5911	28.4418	26.4684	33.0081	64.1149	104.75	29.7487	34.6067	50.36	74.9127	127.487
BnaC09g37120D	GSBRNA2G00094352001	chrC09:40468112-40468952	840	8.86277	11.6756	21.0898	18.0569	37.3113	8.10874	15.9936	10.063	14.5843	16.8013	38.6542
BnaC09g38100D	GSBRNA2G00025406001	chrC09:41110266-41112599	1959	6.88748	328.976	345.456	253.852	492.905	585.542	273.315	338.603	353.93	232.545	542.594
BnaC09g38510D	GSBRNA2G00078480001	chrC09:41386228-41387766	772	0.968732	16.9194	15.3686	13.0131	15.4024	14.7105	13.3088	15.7566	17.9749	6.8545	17.8202
BnaC09g39170D	GSBRNA2G00078376001	chrC09:41829670-41832383	1455	6.06232	16.903	16.7762	15.055	13.7536	16.2652	16.3613	17.339	18.0731	10.0944	16.4594
BnaC09g40550D	GSBRNA2G00094844001	chrC09:42926596-42928084	1255	1.97413	6.34271	7.76584	6.97793	9.53776	12.9484	7.65913	8.10263	8.72726	6.17951	11.0173
BnaC09g40960D	GSBRNA2G00094903001	chrC09:43175641-43180476	3669	4.0773	5.0788	4.741	6.09409	12.0348	19.3385	4.89119	5.05899	9.37937	11.6155	12.2414
BnaC09g43110D	GSBRNA2G00031591001	chrC09:44447534-44447993	459	4.06351	63.4443	98.2261	49.8733	161.594	187.818	58.0921	90.1959	75.6889	57.0364	148.985
BnaC09g43250D	GSBRNA2G00031571001	chrC09:44565598-44567649	1976	8.81937	12.6802	13.274	12.5208	30.8009	10.7328	5.02029	3.27613	5.4084	6.61798	13.7076
BnaC09g43990D	GSBRNA2G00104229001	chrC09:45040570-45041967	1182	3.28898	5.3061	6.11081	6.58325	10.393	12.6616	6.21531	7.8304	8.05543	6.60562	9.10021
BnaC09g44510D	GSBRNA2G00104170001	chrC09:45288733-45291079	1876	0.363883	13.4876	17.4359	13.4812	21.5089	25.3884	15.3595	15.2638	16.5787	11.8975	31.9328
BnaC09g44650D	GSBRNA2G00104151001	chrC09:45367915-45371109	2540	1.35527	18.0119	20.7916	17.4725	23.9053	29.9672	18.1778	19.2255	20.8184	13.9179	35.7614
BnaC09g44950D	GSBRNA2G00104117001	chrC09:45516954-45518872	1386	9.09166	11.3653	12.4148	12.7305	20.1963	25.23	11.1636	10.7838	12.8428	20.1965	20.8848
BnaC09g45170D	GSBRNA2G00104090001	chrC09:45655370-45657448	1161	12.271	9.01186	9.2992	6.94751	1.51896	1.47567	5.71608	9.30786	8.95693	1.81611	0.313358
BnaC09g45480D	GSBRNA2G00104055001	chrC09:45807840-45808582	742	22.7717	51.0909	38.0766	55.643	111.997	184.247	37.2434	53.9364	88.4538	98.471	132.189
BnaC09g45790D	GSBRNA2G00104014001	chrC09:45968263-45968467	204	165.672	217.704	202.135	313.332	450.484	465.712	196.089	236.161	266.739	485.188	650.408
BnaC09g47250D	GSBRNA2G00016028001	chrC09:46697992-46699100	915	11.0518	15.4676	9.86711	19.5041	23.3792	28.1867	10.1881	13.7514	22.0362	19.1178	15.2955
BnaC09g47860D	GSBRNA2G00045443001	chrC09:46983331-46985296	1379	17.1329	140.192	134.346	120.434	172.115	196.798	115.615	144.684	149.397	99.521	214.312
BnaC09g48200D	GSBRNA2G00107138001	chrC09:47146074-47148435	1637	14.2775	11.4415	17.2126	22.5075	39.677	13.0195	20.6165	13.481	25.486	22.6984	48.3757
BnaC09g48600D	GSBRNA2G00107093001	chrC09:47328694-47330684	1408	3.34909	90.8473	119.632	69.8499	153.681	221.844	86.4087	104.203	87.4266	55.1284	132.216
BnaC09g49910D	GSBRNA2G00106945001	chrC09:48035078-48036202	1124	7.44449	3.82871	3.40768	1.82082	0.622616	1.0547	3.19385	2.27554	1.77125	1.321	0.20237
BnaC09g49920D	GSBRNA2G00106944001	chrC09:48039378-48041016	1421	2.30337	3.1759	2.4859	5.63522	8.22349	6.89415	2.73368	5.87122	4.39246	6.51801	5.38336
BnaC09g50050D	GSBRNA2G00106930001	chrC09:48083687-48085090	851	18.8926	24.1113	27.7397	27.7246	64.5079	22.0153	12.2767	11.9188	16.6921	19.8619	45.3197
BnaC09g50190D	GSBRNA2G00106914001	chrC09:48145932-48146988	1056	13.1453	15.1262	12.5836	9.70614	3.84389	7.25869	12.1594	13.9354	10.1267	5.43648	0.806861
BnaC09g51360D	GSBRNA2G00007569001	chrC09_random:502162-506944	690	3.87766	209.896	120.723	146.925	216.521	225.672	116.637	152.114	165.301	97.1439	252.909
BnaC09g51620D	GSBRNA2G00023510001	chrC09_random:781617-783242	1625	13.3153	20.9472	17.4582	17.4482	40.4608	18.6328	8.45643	6.70646	13.3641	14.6091	25.068
BnaC09g52000D	GSBRNA2G00046831001	chrC09_random:1247514-1249888	862	2.79968	180.33	164.762	154.344	228.39	231.622	137.729	178.913	200.004	114.576	252.72
BnaC09g52180D	GSBRNA2G00022692001	chrC09_random:1456185-1456512	327	493.176	434.669	533.158	423.324	161.875	219.736	762.426	552.925	483.128	284.893	75.4604
BnaC09g52640D	GSBRNA2G00025271001	chrC09_random:1978214-1981133	2169	7.28673	7.4637	8.01246	9.65856	1.40849	1.9798	7.52662	8.61815	7.39661	4.8154	2.47367
BnaCnng00770D	GSBRNA2G00110836001	chrCnn_random:978971-979916	823	1.83916	6.85434	6.48826	6.45632	7.92251	10.6256	6.86888	8.58408	5.18632	5.79117	13.9502
BnaCnng01200D	GSBRNA2G00123445001	chrCnn_random:1359889-1361831	1495	2.43901	6.91001	7.05807	5.7634	8.41405	9.94483	6.13235	6.77717	5.26656	6.62057	9.96094
BnaCnng01480D	GSBRNA2G00123482001	chrCnn_random:1604638-1606978	2340	2.48991	2.80967	3.1066	3.17638	6.13556	7.56023	3.02874	3.45232	3.86179	6.21059	6.54206
BnaCnng01720D	GSBRNA2G00123513001	chrCnn_random:1772445-1777817	2298	11.7577	12.6363	9.57754	7.85079	4.12339	5.10409	7.50453	9.43455	8.77022	4.46706	2.87521
BnaCnng01740D	GSBRNA2G00123517001	chrCnn_random:1819915-1821887	1809	39.0859	26.3877	28.0409	17.3638	8.99897	11.3274	15.3592	23.9891	21.0511	14.2071	2.70218
BnaCnng02170D	GSBRNA2G00123561001	chrCnn_random:2001542-2004828	2025	8.65575	16.2112	17.8064	14.7426	21.7643	26.3246	15.9814	18.4128	14.4944	18.3956	25.8368
BnaCnng02400D	GSBRNA2G00123587001	chrCnn_random:2146397-2148586	1760	0.97328	6.96402	10.3224	6.4831	13.4139	18.5691	6.96828	9.54675	6.25439	5.46062	12.0244
BnaCnng02420D	GSBRNA2G00123589001	chrCnn_random:2153709-2156008	1125	0.802347	7.01272	6.99008	6.69657	8.23373	9.3735	7.85591	6.84388	6.39219	4.335	10.0573
BnaCnng03810D	GSBRNA2G00032414001	chrCnn_random:2971180-2974364	1968	0.631139	1.29173	1.26689	1.4221	2.5909	3.82492	0.875833	1.27775	2.72917	2.11188	1.85186
BnaCnng04950D	GSBRNA2G00026681001	chrCnn_random:4526491-4526845	354	5.30235	221.991	187.775	192.651	450.311	362.808	201.743	225.43	230.935	198.632	417.163
BnaCnng05510D	GSBRNA2G00041290001	chrCnn_random:5117224-5118798	1163	9.69891	26.8211	11.7022	23.5388	34.3612	29.4104	11.8286	10.769	19.8388	32.9145	14.7952
BnaCnng05770D	GSBRNA2G00041321001	chrCnn_random:5346171-5348294	1790	5.87021	377.261	323.753	292.023	438.502	512.506	287.333	363.537	372.738	231.449	589.608
BnaCnng05800D	GSBRNA2G00041326001	chrCnn_random:5354794-5361680	2187	1.63238	115.164	110.623	106.179	103.095	130.08	93.3177	116.508	142.009	59.9883	158.527
BnaCnng06220D	GSBRNA2G00041374001	chrCnn_random:5572575-5576011	1869	1.75821	7.10183	7.87525	7.09524	9.89083	9.93736	7.28	7.85456	7.74239	4.93056	12.3248
BnaCnng06770D	GSBRNA2G00051546001	chrCnn_random:5830208-5831096	888	34.9404	46.7144	50.7884	53.9006	131.924	51.7754	26.5231	38.2611	40.4805	57.5228	94.7364
BnaCnng07050D	GSBRNA2G00053825001	chrCnn_random:6176478-6183374	1704	7.56145	9.62153	11.2824	8.48447	2.07018	3.26591	15.968	13.1209	8.40986	3.72799	0.726578
BnaCnng07700D	GSBRNA2G00062428001	chrCnn_random:7038005-7038658	653	35.9276	45.6614	26.02	16.3094	8.45062	15.4419	30.1507	36.7137	26.312	9.77913	0.840599
BnaCnng08080D	GSBRNA2G00063754001	chrCnn_random:7469653-7473057	2042	5.88666	35.053	35.2823	32.7994	39.7585	43.2627	32.5627	37.0658	41.1365	23.77	50.6843
BnaCnng08620D	GSBRNA2G00065055001	chrCnn_random:8079643-8080493	850	3.43856	6.58683	4.7121	7.04759	16.3096	6.16847	3.58618	6.54676	7.61627	6.85467	14.7534
BnaCnng08650D	GSBRNA2G00065059001	chrCnn_random:8087173-8087905	732	2.63889	136.883	132.738	122.394	166.885	211.093	128.639	148.329	152.574	95.6949	232.58
BnaCnng08770D	GSBRNA2G00065074001	chrCnn_random:8150521-8153228	1755	14.0426	14.7434	16.6333	17.4894	33.3413	23.9815	15.3988	13.6641	18.5662	23.995	52.0664
BnaCnng08890D	GSBRNA2G00065089001	chrCnn_random:8194479-8196157	1138	0.699814	18.2913	16.0929	15.5542	22.2351	23.321	14.3573	16.3071	19.8763	9.32082	24.9095
BnaCnng10290D	GSBRNA2G00072978001	chrCnn_random:9360808-9362430	1060	2.61334	91.2979	89.7236	77.3228	130.268	161.469	73.8231	97.0937	99.8569	62.4409	167.81
BnaCnng10780D	GSBRNA2G00075915001	chrCnn_random:9953939-9957781	2538	0.355467	18.9442	18.5704	16.9494	33.134	38.3982	21.9962	19.9766	21.7666	17.5104	44.9591
BnaCnng12640D	GSBRNA2G00082174001	chrCnn_random:11838741-11842019	1753	34.3804	24.7793	13.0547	184.023	184.142	271.733	101.223	150.084	45.1341	192.654	769.353
BnaCnng12720D	GSBRNA2G00082193001	chrCnn_random:11866193-11867217	1024	1.08167	0.7221	0.79363	7.20448	8.00152	9.8688	4.56548	9.15174	1.83409	8.16333	20.553
BnaCnng13510D	GSBRNA2G00082473001	chrCnn_random:12263113-12265791	1712	1.58252	103.877	110.226	96.4812	132.895	147.386	99.634	116.255	122.093	70.5055	185.804
BnaCnng13990D	GSBRNA2G00085819001	chrCnn_random:12749326-12751138	1245	4.28776	12.368	12.3707	11.94	14.0356	14.6989	12.2048	13.4198	13.0989	9.98872	15.5595
BnaCnng14120D	GSBRNA2G00085844001	chrCnn_random:12904437-12904623	186	45.7977	767.946	720.057	814.34	1401.48	1743.12	629.602	843.285	852.042	587.431	1488.11
BnaCnng14580D	GSBRNA2G00086218001	chrCnn_random:13512548-13513348	679	3.99118	184.892	189.532	154.16	260.75	304.953	178.2	207.289	220.574	131.241	353.36
BnaCnng18100D	GSBRNA2G00093820001	chrCnn_random:16892641-16893527	886	15.5909	11.5042	12.7602	9.11624	6.79712	4.85491	11.7892	11.5115	8.82032	7.6418	5.12519
BnaCnng18160D	GSBRNA2G00093833001	chrCnn_random:16936989-16938582	1593	2.61678	88.7824	89.5676	79.8065	143.894	152.285	86.8863	102.111	98.8905	80.328	209.865
BnaCnng19220D	GSBRNA2G00096612001	chrCnn_random:17903979-17904866	730	15.2876	296.961	286.422	260.512	348.853	372.064	244.189	309.219	209.904	190.525	434.735
BnaCnng19560D	GSBRNA2G00097496001	chrCnn_random:18348542-18350276	1107	3.74439	10.453	9.0397	8.94013	12.3868	14.9354	9.30034	9.03623	10.3442	8.5373	15.7953
BnaCnng20480D	GSBRNA2G00003111001	chrCnn_random:19243227-19245726	2345	1.83723	4.09827	4.19856	6.59896	15.8901	25.564	3.43161	5.81512	10.6452	14.7273	20.0059
BnaCnng20740D	GSBRNA2G00003230001	chrCnn_random:19445798-19447307	1509	0.765159	0.474474	0.796644	3.63883	4.66564	6.10731	1.77742	4.42895	0.909156	3.88147	4.7772
BnaCnng22570D	GSBRNA2G00007208001	chrCnn_random:21157997-21160836	1761	18.655	17.3158	20.6061	24.4674	38.9442	65.3254	20.8097	23.3948	34.0983	40.069	62.4876
BnaCnng23280D	GSBRNA2G00007840001	chrCnn_random:21839172-21839727	483	2.20204	87.7468	84.7824	73.5451	122.266	119.52	69.3149	91.3554	63.8121	55.792	151.907
BnaCnng23550D	GSBRNA2G00007895001	chrCnn_random:21959659-21960515	751	1.04964	10.8557	23.6021	7.67123	32.8612	64.8676	9.80774	10.6329	7.00061	7.60051	8.7039
BnaCnng24140D	GSBRNA2G00008518001	chrCnn_random:22725450-22726614	1087	148.886	212.817	142.085	134.48	63.5788	43.3209	118.503	187.618	136.65	92.7067	71.6564
BnaCnng26490D	GSBRNA2G00013603001	chrCnn_random:24966270-24967539	1173	3.00137	9.56026	5.4745	12.4627	16.0035	16.0915	4.11411	6.674	14.568	12.7285	7.29576
BnaCnng27960D	GSBRNA2G00014964001	chrCnn_random:26526738-26528933	1807	3.37545	9.40546	6.72926	9.5012	8.7183	11.5262	6.12853	6.99453	11.4657	11.334	2.28605
BnaCnng28420D	GSBRNA2G00016503001	chrCnn_random:26933801-26938640	3739	1.638	4.50211	6.0627	4.46052	5.77051	7.86205	6.22923	5.32709	5.82098	4.93481	11.5589
BnaCnng29100D	GSBRNA2G00017356001	chrCnn_random:27570085-27572816	2107	0.337401	16.5815	17.8692	14.2873	26.8581	34.0007	18.3281	19.0468	23.5701	15.0908	35.3458
BnaCnng29300D	GSBRNA2G00017387001	chrCnn_random:27756319-27759019	2104	19.8778	26.3653	21.9128	28.5762	61.4729	106.443	28.9366	24.8499	47.027	61.8989	111.417
BnaCnng30450D	GSBRNA2G00019633001	chrCnn_random:28963812-28966966	2473	14.3564	3.68273	4.06707	3.94514	2.14329	2.19592	6.33743	5.17214	3.25922	4.22975	4.31834
BnaCnng30550D	GSBRNA2G00019696001	chrCnn_random:29036251-29039848	1139	6.71708	49.3726	43.4711	48.4748	81.6261	86.474	42.0731	46.7753	46.1027	47.3659	97.3332
BnaCnng30830D	GSBRNA2G00019869001	chrCnn_random:29303764-29307039	2168	11.8095	15.3438	16.3272	20.9682	36.2356	45.0304	13.9208	16.0724	27.4114	37.2169	41.2
BnaCnng31830D	GSBRNA2G00020917001	chrCnn_random:30249218-30249483	265	23.6593	1239.92	898.422	1056.35	1505.08	1561.65	837.338	1059.12	1143.87	686.457	1659.63
BnaCnng36390D	GSBRNA2G00029705001	chrCnn_random:34862793-34863803	1010	26.6655	22.4726	24.2266	21.736	9.17055	13.3988	26.9024	20.3349	20.1434	11.8378	12.956
BnaCnng36540D	GSBRNA2G00029841001	chrCnn_random:34948255-34950107	1618	28.152	56.0943	58.11	51.026	71.1515	77.5343	55.4048	59.9175	61.4744	46.5254	82.8616
BnaCnng37520D	GSBRNA2G00033610001	chrCnn_random:36012144-36013668	1524	2.00987	8.46128	10.3333	20.7451	23.0872	26.2504	8.80684	21.4122	21.4278	17.7286	9.71485
BnaCnng37560D	GSBRNA2G00033615001	chrCnn_random:36036056-36038332	1327	2.91002	4.77285	4.40915	5.27264	5.51981	9.00683	5.27339	4.92822	5.24259	3.78814	4.0176
BnaCnng37990D	GSBRNA2G00034013001	chrCnn_random:36513677-36519018	3115	0.69614	0.936367	0.85527	0.707376	2.48623	3.33283	1.10492	0.855454	1.23857	2.26746	2.65982
BnaCnng38030D	GSBRNA2G00034021001	chrCnn_random:36547113-36550068	2876	9.12269	7.37353	9.03031	8.34197	3.16106	6.45268	8.70728	7.44112	8.67436	4.07594	1.51233
BnaCnng38150D	GSBRNA2G00034147001	chrCnn_random:36708762-36709998	1236	85.7824	80.3944	76.5193	66.0459	26.3683	52.4193	48.8828	64.24	64.2924	37.899	19.3631
BnaCnng39320D	GSBRNA2G00035996001	chrCnn_random:38028422-38032031	1198	20.0914	56.4073	56.7736	54.7009	93.9671	96.7629	51.0709	56.4698	52.2933	56.5593	106.636
BnaCnng39460D	GSBRNA2G00036040001	chrCnn_random:38121054-38122276	900	6.85378	10.6061	1.57503	11.8664	11.8277	30.1456	5.82001	6.02027	4.32437	6.93254	4.82665
BnaCnng39740D	GSBRNA2G00036115001	chrCnn_random:38336295-38337720	768	18.5384	17.1611	13.0015	13.8804	2.74349	5.67265	10.2204	12.8562	18.6822	5.24531	0.317006
BnaCnng40440D	GSBRNA2G00036396001	chrCnn_random:38992775-38993300	525	58.3878	37.3811	38.0891	33.4639	20.8916	28.2024	40.7985	39.834	44.892	25.6405	6.30423
BnaCnng40460D	GSBRNA2G00036429001	chrCnn_random:39004746-39006265	1326	1.17712	9.41517	23.053	6.3569	25.879	62.3854	13.8683	16.8063	12.9227	4.69004	5.976
BnaCnng41410D	GSBRNA2G00037942001	chrCnn_random:40227123-40227543	420	5.4849	294.569	230.623	225.985	357.797	386.301	192.939	268.184	280.57	175.59	414.144
BnaCnng41520D	GSBRNA2G00037967001	chrCnn_random:40335996-40336725	729	68.287	63.4634	77.3699	79.8047	177.637	159.866	67.9767	91.1869	83.2482	157.694	117.648
BnaCnng42530D	GSBRNA2G00039587001	chrCnn_random:41625519-41627260	1317	1.19907	2.48002	2.03264	2.11651	3.50248	9.98608	2.38754	1.92519	4.26191	4.16272	5.2995
BnaCnng42690D	GSBRNA2G00039631001	chrCnn_random:41740410-41742712	1798	0.504885	33.8151	36.5107	29.0308	53.1945	61.8051	34.0951	36.7503	37.5489	30.3278	64.4868
BnaCnng44030D	GSBRNA2G00042303001	chrCnn_random:43169546-43171387	1167	1.31076	6.21318	4.92921	9.15566	15.1037	21.7122	4.34143	10.9095	14.6057	17.5465	11.1023
BnaCnng46510D	GSBRNA2G00045562001	chrCnn_random:45837549-45840230	1559	0.523984	23.5745	20.8866	20.3511	38.3491	46.1688	27.262	25.3845	27.9344	20.4018	51.0204
BnaCnng47130D	GSBRNA2G00046590001	chrCnn_random:46541337-46544297	976	44.158	54.5306	56.2696	83.0353	157.759	125.936	60.422	76.9666	67.836	183.627	225.221
BnaCnng48740D	GSBRNA2G00048242001	chrCnn_random:48120787-48122618	1555	5.50144	236.362	207.355	187.212	442.865	486.22	212.967	239.717	248.165	220.538	519.306
BnaCnng51340D	GSBRNA2G00054513001	chrCnn_random:50783879-50785936	1127	5.59902	7.56292	9.83195	8.43162	22.7314	6.35094	2.88497	5.60321	3.9999	7.48108	6.88386
BnaCnng51430D	GSBRNA2G00054536001	chrCnn_random:50860091-50862240	1700	3.35505	11.5509	13.1824	10.8262	15.2649	17.1665	11.7356	13.4307	13.7986	9.41995	17.7281
BnaCnng51570D	GSBRNA2G00054617001	chrCnn_random:51032707-51035062	1958	0.807772	14.2163	25.8905	14.2475	28.3127	42.8832	17.3306	21.682	19.6632	11.3058	29.73
BnaCnng51910D	GSBRNA2G00055553001	chrCnn_random:51414351-51415645	1233	3.23567	5.56834	5.4809	7.91219	11.9742	10.3034	3.7264	7.60229	13.224	7.54515	5.57312
BnaCnng52120D	GSBRNA2G00055652001	chrCnn_random:51573312-51573705	393	3.41991	208.032	180.02	187.815	273.023	260.753	153.61	208.489	221.834	120.028	347.941
BnaCnng56620D	GSBRNA2G00066946001	chrCnn_random:56492498-56493752	1074	4.20859	7.40779	9.43575	13.3165	35.1561	21.1788	4.45892	9.13608	14.7284	9.04807	5.2121
BnaCnng57640D	GSBRNA2G00069259001	chrCnn_random:57387274-57389826	1131	0.553684	23.649	22.3034	21.0717	29.9455	35.1226	19.4584	21.4504	23.6922	17.222	43.0404
BnaCnng58090D	GSBRNA2G00072031001	chrCnn_random:57821450-57822991	1355	56.4076	63.9109	64.6482	79.3144	193.153	172.926	59.882	85.3106	82.1635	198.363	261.887
BnaCnng58640D	GSBRNA2G00073527001	chrCnn_random:58382886-58386098	1898	7.47669	5.13295	7.12417	5.60377	2.23825	3.14413	4.82853	5.12117	5.33241	3.87476	1.05696
BnaCnng58860D	GSBRNA2G00074142001	chrCnn_random:58538195-58540345	1514	61.2387	49.2844	48.7657	35.7884	21.3294	33.6573	33.2384	47.3838	46.1322	29.0342	14.4055
BnaCnng59120D	GSBRNA2G00074261001	chrCnn_random:58787830-58790301	2018	0.654948	5.37815	6.36065	5.21442	7.18417	11.5501	5.8409	5.97577	6.62947	5.70893	11.5382
BnaCnng59680D	GSBRNA2G00075985001	chrCnn_random:59438487-59442463	2713	6.06601	4.71411	5.56411	5.15644	2.1161	3.88338	4.57159	3.71612	5.20045	3.4295	1.53136
BnaCnng60280D	GSBRNA2G00077121001	chrCnn_random:60038806-60040960	1793	2.93594	144.851	139.744	130.952	192.796	216.386	130.985	143.142	162.049	105.527	257.967
BnaCnng61530D	GSBRNA2G00082566001	chrCnn_random:61392546-61395401	1752	0.340604	20.1721	23.3436	18.6236	27.1784	37.6853	20.0222	20.8922	26.4297	16.9347	41.4534
BnaCnng62150D	GSBRNA2G00083500001	chrCnn_random:61929553-61929996	443	39.9548	50.7448	48.5928	76.8699	110.563	101.226	48.608	70.6549	74.6943	86.3935	128.326
BnaCnng62360D	GSBRNA2G00083907001	chrCnn_random:62181987-62183029	761	1.22036	22.6046	32.0077	18.5062	49.3236	60.2093	25.6469	33.8864	24.7471	15.6512	36.7738
BnaCnng62910D	GSBRNA2G00086546001	chrCnn_random:62692213-62692766	553	24.8997	45.5548	33.8582	23.1714	4.23123	7.12431	22.8797	22.0787	24.4238	3.88133	4.87481
BnaCnng63480D	GSBRNA2G00087773001	chrCnn_random:63410034-63411368	1062	12.4183	12.9097	10.7238	8.49285	3.30769	4.72173	7.30524	8.87388	8.86128	6.15926	1.59853
BnaCnng64010D	GSBRNA2G00088502001	chrCnn_random:63759327-63762009	2378	7.06627	14.6238	8.82809	9.3024	13.4044	20.0306	10.1103	9.48635	20.2376	21.3555	6.33622
BnaCnng64550D	GSBRNA2G00089546001	chrCnn_random:64319926-64322246	1805	0.979273	71.5078	82.6061	62.9932	101.356	133.001	73.2645	65.5722	79.5038	61.7507	148.625
BnaCnng66900D	GSBRNA2G00096582001	chrCnn_random:66590503-66592591	1902	4.06567	44.216	48.672	28.5713	73.5377	150.641	28.5043	53.6713	46.8821	24.1228	45.0521
BnaCnng67100D	GSBRNA2G00097050001	chrCnn_random:66785262-66786909	1274	0.579069	10.9213	11.8478	8.21297	10.7785	14.6902	10.1346	10.9054	11.276	6.12369	15.2676
BnaCnng67300D	GSBRNA2G00097374001	chrCnn_random:67037376-67038899	1110	2.14357	1.57238	1.7609	1.28584	1.89543	10.1297	3.78418	6.15054	2.6407	2.59953	2.10814
BnaCnng70410D	GSBRNA2G00008409001	chrCnn_random:70436164-70437454	1290	1.74129	3.25702	3.79211	6.06521	7.46792	10.2673	4.00158	5.94118	7.4014	6.0067	4.08974
BnaCnng70940D	GSBRNA2G00010590001	chrCnn_random:71029524-71031727	1713	4.24312	6.58087	6.64526	8.1863	17.5441	34.0375	7.21612	7.77776	14.1124	18.1194	27.1856
BnaCnng71300D	GSBRNA2G00011180001	chrCnn_random:71480283-71481422	1048	2.68062	18.2642	51.5294	10.8364	101.255	155.161	26.3665	17.5831	9.07605	14.2634	38.2445
BnaCnng71320D	GSBRNA2G00011183001	chrCnn_random:71488765-71489530	511	132.131	146.729	171.25	210.215	343.455	384.034	124.201	235.859	217.488	318.027	138.057
BnaCnng71770D	GSBRNA2G00011949001	chrCnn_random:72040788-72042162	1027	3.16831	135.892	137.832	110.921	155.494	208.791	122.49	168.021	164.101	91.6858	239.1
BnaCnng72960D	GSBRNA2G00015050001	chrCnn_random:73408093-73408766	673	16.9532	18.1102	19.5189	23.2958	54.4258	52.5183	17.7677	23.4152	23.4968	61.5246	45.6565
BnaCnng73190D	GSBRNA2G00016719001	chrCnn_random:73683813-73684891	918	10.9523	589.67	574.732	500.005	862.792	1005.11	496.838	569.713	644.421	466.064	1117.64
BnaCnng73290D	GSBRNA2G00016876001	chrCnn_random:73823168-73824316	1148	64.7066	107.01	105.629	147.366	246.565	265.582	90.1505	137.645	164.455	238.219	297.628
BnaCnng73390D	GSBRNA2G00017079001	chrCnn_random:73943409-73943922	513	46.9175	33.106	29.7332	21.9193	6.92616	3.97931	11.3773	24.8243	19.8323	10.4812	0.338287
BnaCnng73470D	GSBRNA2G00017259001	chrCnn_random:74071303-74072988	1593	0.678552	6.76493	7.59183	6.55513	10.5354	14.848	7.06193	7.8053	8.31653	6.33766	11.5656
BnaCnng75130D	GSBRNA2G00022521001	chrCnn_random:76107204-76108909	1212	3.39733	150.128	156.816	132.841	237.77	297.04	146.826	163.585	166.811	135.675	341.373
BnaCnng76190D	GSBRNA2G00025217001	chrCnn_random:77279419-77279904	485	22.202	29.3959	38.6384	46.8758	65.4978	56.295	27.6293	43.9557	44.4862	44.7386	36.9313
BnaCnng76410D	GSBRNA2G00025657001	chrCnn_random:77586501-77588482	1825	15.4301	895.17	832.363	802.507	1088.22	1328.06	810.669	902.229	1007.03	608.88	1552.14
BnaUnng00020D	GSBRNA2G00038416001	chrUnn_random:12540-13020	480	154.624	212.527	225.513	293.911	516.675	569.758	183.75	299.717	334.149	484.961	536.894
BnaUnng03570D	GSBRNA2G00094264001	chrUnn_random:5067934-5068651	717	128.953	150.665	97.369	90.0419	19.2382	43.7548	53.2456	108.409	120.427	50.8697	7.08612

## Sheet: UP VS PI
Bna_gene_id	gene_short_name	locus	length	UP_FPKM	PC2_FPKM	PC5_FPKM	PC10_FPKM	PC20_FPKM	PC30_FPKM	PI2_FPKM	PI5_FPKM	PI10_FPKM	PI20_FPKM	PI30_FPKM
BnaA01g00010D	GSBRNA2G00121640001	chrA01:830-1437	607	49.448	40.5766	43.3326	45.8651	65.6096	49.0763	42.8455	51.5031	39.547	67.6949	91.6819
BnaA01g00150D	GSBRNA2G00121623001	chrA01:48078-51257	1089	5.7902	7.8137	5.17149	7.6207	4.06466	4.05538	6.24251	6.20962	6.97573	5.77662	1.86843
BnaA01g00670D	GSBRNA2G00121554001	chrA01:360233-361364	1044	13.1158	15.5211	14.9803	12.7756	6.3612	10.929	16.0571	14.5918	19.9048	7.7905	3.42186
BnaA01g00690D	GSBRNA2G00121552001	chrA01:379802-381866	1347	202.121	183.963	166.716	146.38	105.494	207.63	184.642	205.985	191.821	172.677	28.7807
BnaA01g00730D	GSBRNA2G00121547001	chrA01:430858-432758	1232	2.78999	1.84613	2.36057	4.14794	3.80234	4.2356	3.53786	2.36324	3.72987	2.95952	6.21545
BnaA01g01140D	GSBRNA2G00121497001	chrA01:610363-612031	1446	20.6606	15.9582	21.7318	18.2812	19.3021	19.2271	22.976	24.7294	17.1588	28.0631	7.57379
BnaA01g01260D	GSBRNA2G00121483001	chrA01:652262-657730	2629	0.112097	5.99652	7.20092	5.23812	10.472	11.3697	6.61559	6.73898	6.873	4.56756	12.9761
BnaA01g01320D	GSBRNA2G00121476001	chrA01:687602-693550	1584	26.8574	28.7474	25.7058	27.0222	14.2593	24.4669	21.6621	26.761	27.4882	19.4287	9.13846
BnaA01g01340D	GSBRNA2G00121474001	chrA01:706695-715008	4311	2.29363	2.51728	2.39305	2.44275	2.52245	2.42411	2.63044	2.15041	2.55318	3.2255	5.29193
BnaA01g01350D	GSBRNA2G00121472001	chrA01:720685-722006	942	1.4196	1.02377	1.72887	2.25675	1.44589	1.15017	2.29566	1.8374	2.7129	1.28874	5.8678
BnaA01g01360D	GSBRNA2G00121471001	chrA01:724078-727023	1624	53.4386	49.9857	61.5992	52.6733	76.4264	94.7134	59.5807	50.5067	65.5961	84.5637	120.08
BnaA01g01690D	GSBRNA2G00121431001	chrA01:894402-895955	1177	50.7739	52.9577	49.8373	49.2513	70.7657	70.1577	47.8463	52.91	54.5266	82.1797	103.178
BnaA01g01750D	GSBRNA2G00121425001	chrA01:912922-924258	8151	1.21287	7.67843	8.91119	7.15316	10.8368	12.9162	8.71128	8.26331	8.18871	6.87091	16.0792
BnaA01g01830D	GSBRNA2G00121417001	chrA01:941867-942626	759	1.89412	112.217	122.158	124.429	104.712	200.137	91.7707	92.6645	115.321	51.57	154.139
BnaA01g01910D	GSBRNA2G00121409001	chrA01:970203-971701	940	4.1394	3.49017	3.37186	5.25056	9.64534	8.29077	4.68792	2.97477	5.2395	8.5442	9.64856
BnaA01g02060D	GSBRNA2G00121394001	chrA01:1028245-1029663	1200	40.598	27.78	36.8605	50.3442	37.9419	26.3799	64.7451	51.1302	49.9052	48.5499	16.8967
BnaA01g02210D	GSBRNA2G00121378001	chrA01:1135518-1137250	1209	9.24778	11.3695	6.74776	8.48604	1.65993	2.41237	6.24326	8.28606	8.01277	2.46114	0.397941
BnaA01g02230D	GSBRNA2G00121376001	chrA01:1142698-1147072	2878	6.89308	60.7476	51.7418	48.062	85.6753	102.676	46.4712	47.7851	56.1798	32.7764	71.9288
BnaA01g02240D	GSBRNA2G00121374001	chrA01:1150656-1151733	864	156.637	138.781	133.755	117.699	96.3217	118.776	112.758	142.348	121.894	97.2605	40.2106
BnaA01g02250D	GSBRNA2G00121373001	chrA01:1153360-1154296	734	47.5441	35.0188	28.3088	25.8425	10.02	16.721	18.8813	38.7987	30.0676	19.3219	0.815229
BnaA01g02530D	GSBRNA2G00121342001	chrA01:1270474-1271575	1029	44.6411	30.3863	45.4806	40.6263	64.7842	47.3393	48.2671	53.1965	35.2245	71.1451	112.998
BnaA01g02570D	GSBRNA2G00121337001	chrA01:1280573-1281038	465	159.554	149.26	148.895	133.796	93.3604	92.773	133.548	159.594	138.718	82.6151	47.1363
BnaA01g02780D	GSBRNA2G00121312001	chrA01:1369238-1372578	1686	9.52722	8.49028	9.22267	7.87294	6.19579	5.83326	6.71651	6.97558	7.82607	5.56826	2.21796
BnaA01g03040D	GSBRNA2G00121284001	chrA01:1467744-1469440	804	33.6809	36.3062	32.4923	34.6837	20.8963	21.8828	29.7963	37.4913	35.9776	19.338	14.9029
BnaA01g03050D	GSBRNA2G00121283001	chrA01:1469886-1473466	2310	33.0962	33.3175	32.3828	33.6915	42.3845	39.0767	32.3935	32.0468	33.8313	45.9347	73.4105
BnaA01g03090D	GSBRNA2G00121277001	chrA01:1492366-1494367	2001	2.07312	122.52	148.951	105.17	177.772	191.364	133.706	146.481	141.152	100.504	218.143
BnaA01g03200D	GSBRNA2G00121264001	chrA01:1539794-1547472	1730	22.6174	28.0976	25.1669	31.7987	54.287	29.2291	21.2091	16.6244	23.5604	29.2167	49.68
BnaA01g03500D	GSBRNA2G00121231001	chrA01:1643530-1646444	1498	8.56816	7.02252	6.88297	6.69328	7.29201	8.07555	7.42834	7.601	6.7645	6.99167	2.35838
BnaA01g03580D	GSBRNA2G00121222001	chrA01:1675528-1679500	2619	6.12901	10.5422	10.3031	11.0713	9.40653	11.1851	10.4612	9.56093	13.374	15.6157	4.91462
BnaA01g03620D	GSBRNA2G00121218001	chrA01:1693257-1696622	1554	1.59942	1.12903	1.58957	1.45585	2.10028	2.21945	2.31147	1.29471	2.45767	3.66259	15.4966
BnaA01g03830D	GSBRNA2G00121195001	chrA01:1775187-1775622	435	71.8574	59.9973	55.4754	46.1908	46.5757	49.6529	57.6081	60.9974	56.1132	50.617	30.0454
BnaA01g04120D	GSBRNA2G00121158001	chrA01:1895761-1897683	990	0.337798	3.45999	2.13801	2.49394	5.20757	5.83649	3.92599	5.14359	3.79749	3.20825	6.68675
BnaA01g04520D	GSBRNA2G00121111001	chrA01:2107640-2114667	4066	4.73907	11.4685	12.2792	10.749	12.1311	14.2793	11.0248	11.571	11.9777	8.4901	15.9544
BnaA01g04640D	GSBRNA2G00121096001	chrA01:2162637-2165507	2195	23.7527	18.5357	17.9049	15.7701	7.81742	12.0919	13.5222	16.2226	15.5171	10.7911	3.47914
BnaA01g04650D	GSBRNA2G00121095001	chrA01:2166452-2168298	1171	3.75296	4.56395	3.08455	3.2299	1.39109	1.57163	2.81661	4.34918	3.12337	0.917577	0.619659
BnaA01g05060D	GSBRNA2G00121042001	chrA01:2371396-2372853	1000	3.42036	6.56443	5.22609	11.1607	21.1015	22.4665	4.65865	8.09646	21.441	21.0477	16.1028
BnaA01g05270D	GSBRNA2G00073942001	chrA01:2463322-2466286	1488	4.08884	3.37437	3.46806	4.01172	2.00404	1.77384	3.90484	4.58659	4.42584	3.53406	1.32477
BnaA01g05280D	GSBRNA2G00073946001	chrA01:2484722-2488070	1868	6.6238	8.24786	8.02814	7.24777	5.58215	10.2081	6.61046	5.83857	6.39166	6.66135	1.61573
BnaA01g05290D	GSBRNA2G00073948001	chrA01:2489819-2491268	639	32.8979	35.9038	33.0948	29.2629	30.9896	60.0258	38.1067	37.3337	33.9868	29.8298	11.5269
BnaA01g05340D	GSBRNA2G00073954001	chrA01:2506614-2509194	2580	0.424993	24.5337	30.1448	23.2889	32.0796	37.5968	24.4099	28.453	29.2422	19.1986	49.864
BnaA01g05410D	GSBRNA2G00073961001	chrA01:2522159-2523212	639	43.6014	51.1205	36.0801	44.7752	42.1616	24.2369	32.7573	37.4544	40.9094	22.3991	13.5082
BnaA01g05660D	GSBRNA2G00073995001	chrA01:2633734-2636585	1874	87.6626	63.7835	80.9522	71.7102	120.829	131.619	71.4648	68.9251	73.7226	130.511	174.51
BnaA01g05900D	GSBRNA2G00039995001	chrA01:2737962-2740864	1705	5.94328	6.35165	6.43172	6.81545	5.95274	5.91916	7.8024	7.98337	7.50231	7.49231	11.4083
BnaA01g05960D	GSBRNA2G00039989001	chrA01:2760842-2763181	1183	2.45215	7.19589	5.84246	5.49171	7.06475	5.94671	6.00633	6.90858	6.48113	3.77837	6.0662
BnaA01g06120D	GSBRNA2G00039970001	chrA01:2829649-2832027	1826	18.7552	22.2098	24.926	24.2768	25.5268	33.9284	21.6058	24.2381	25.9322	40.0133	30.2378
BnaA01g06140D	GSBRNA2G00039968001	chrA01:2834349-2835072	408	9.32187	8.00301	13.4795	10.762	12.538	12.4939	10.5992	11.5247	11.8605	12.0523	26.3092
BnaA01g06150D	GSBRNA2G00039967001	chrA01:2835124-2836307	858	7.87124	8.30467	9.30597	9.42344	10.9901	9.89093	10.49	7.82034	9.31039	14.4057	17.4125
BnaA01g06170D	GSBRNA2G00039964001	chrA01:2841641-2844153	1232	5.70209	5.42013	4.81082	5.10945	3.08868	4.03845	4.55615	5.72828	3.88957	3.85607	1.73953
BnaA01g06270D	GSBRNA2G00039950001	chrA01:2902452-2904349	1194	2.71529	9.69824	11.6117	8.9173	15.6828	17.0798	11.1659	10.9436	11.1928	8.79164	15.6108
BnaA01g06370D	GSBRNA2G00039938001	chrA01:2936576-2941641	4029	6.8521	5.60055	5.75484	4.62019	2.89338	5.01291	3.85259	5.03874	4.89731	3.10556	1.47219
BnaA01g06640D	GSBRNA2G00039902001	chrA01:3083775-3084876	894	14.0157	13.0217	13.9647	13.9512	6.94963	9.66926	12.2305	14.0671	13.0697	8.67962	3.08221
BnaA01g06700D	GSBRNA2G00039895001	chrA01:3112351-3115459	1940	1.49667	1.83116	1.9627	2.41999	3.3241	2.12132	1.6083	1.01256	2.12876	1.67929	4.34652
BnaA01g06730D	GSBRNA2G00039891001	chrA01:3123722-3124923	1006	20.6181	23.3661	28.7164	28.8695	58.0819	49.2221	20.9733	22.9292	23.7399	52.6833	43.2234
BnaA01g06750D	GSBRNA2G00039889001	chrA01:3132438-3133759	1129	14.8849	12.9693	6.05288	12.4664	1.29111	4.27231	11.6215	5.3319	8.01958	4.87517	2.03371
BnaA01g06780D	GSBRNA2G00039886001	chrA01:3141838-3143714	1333	17.3063	16.2837	16.0465	15.5569	9.73529	12.8403	15.193	16.4258	15.767	12.0735	7.44435
BnaA01g06860D	GSBRNA2G00039872001	chrA01:3225653-3232338	5721	1.0889	1.21575	1.25859	1.24335	0.914939	0.788497	0.72623	0.738106	1.03428	0.652992	0.295756
BnaA01g07330D	GSBRNA2G00076794001	chrA01:3445747-3447421	998	13.6755	9.38635	12.2278	12.864	17.5321	10.3901	12.7317	12.5772	12.9819	17.7546	31.7837
BnaA01g07720D	GSBRNA2G00058180001	chrA01:3672193-3673333	1140	5.56189	4.17969	4.76746	7.83007	5.39143	3.13981	10.232	6.3921	6.52081	8.18487	1.58667
BnaA01g07750D	GSBRNA2G00058175001	chrA01:3676984-3685534	3339	8.48786	15.8454	19.2639	16.7874	23.9199	32.6554	18.1633	19.2289	18.0514	14.8033	23.7085
BnaA01g07910D	GSBRNA2G00058154001	chrA01:3737024-3741726	2606	34.2909	35.8464	32.0992	28.0584	20.4907	27.0715	30.6843	30.2924	32.3231	24.3024	15.4973
BnaA01g08120D	GSBRNA2G00058128001	chrA01:3845658-3848204	1293	11.2346	14.6968	13.5757	17.0229	37.5768	19.4096	13.91	12.8761	14.581	19.5126	41.2097
BnaA01g08240D	GSBRNA2G00058113001	chrA01:3925188-3929918	2221	38.5947	41.0265	29.6668	30.6085	34.2523	30.7339	26.3521	28.5484	21.6121	22.0899	6.66085
BnaA01g08410D	GSBRNA2G00058093001	chrA01:4021797-4022426	570	49.7535	45.0552	42.8711	46.6107	41.1641	69.916	41.0741	41.0544	47.1435	64.79	20.8108
BnaA01g08680D	GSBRNA2G00131268001	chrA01:4163480-4164859	1133	9.97296	16.056	16.0242	17.1404	23.4776	19.499	19.7525	18.498	17.2689	14.907	22.5797
BnaA01g08770D	GSBRNA2G00131280001	chrA01:4244335-4246535	1231	5.24755	8.22176	5.16878	4.98315	2.6412	4.33706	5.00738	5.45808	4.16317	3.11289	1.47183
BnaA01g08860D	GSBRNA2G00131289001	chrA01:4288488-4290081	1211	12.731	10.6126	10.2605	9.15145	6.43176	4.65806	6.58111	9.01216	11.8469	4.96537	1.19919
BnaA01g08870D	GSBRNA2G00131290001	chrA01:4290305-4291572	776	6.03707	6.2352	5.75956	4.64807	3.00276	3.02931	3.59159	4.01921	5.67376	3.2907	0.950503
BnaA01g08890D	GSBRNA2G00131294001	chrA01:4314467-4318372	2126	12.8177	11.3593	11.6778	12.7768	8.39652	11.0637	12.8845	12.9341	11.6218	10.9899	5.65579
BnaA01g08930D	GSBRNA2G00131298001	chrA01:4336238-4339607	2249	2.50642	2.46192	2.09171	2.60124	1.23165	1.17966	2.70232	2.33472	2.27711	1.58166	0.657007
BnaA01g09070D	GSBRNA2G00131315001	chrA01:4422831-4424612	1206	14.3603	9.68158	9.87788	5.69144	5.54931	7.107	5.48202	4.97316	6.00207	7.6871	0.924361
BnaA01g09140D	GSBRNA2G00131322001	chrA01:4465069-4465851	717	23.9835	22.888	22.0729	19.33	15.9154	19.756	18.4129	21.1424	18.0121	19.9062	8.56666
BnaA01g09150D	GSBRNA2G00131323001	chrA01:4465909-4466728	819	17.7571	16.9238	17.3954	13.6234	11.2039	14.5318	13.9431	18.0958	11.7801	17.0484	7.32108
BnaA01g09410D	GSBRNA2G00131351001	chrA01:4607771-4608290	519	4.87138	192.488	169.436	154.039	276.757	285.237	170.74	197.703	195.883	123.231	309.366
BnaA01g09480D	GSBRNA2G00131359001	chrA01:4643315-4646737	2446	2.64301	3.97292	4.61036	4.46866	4.14041	5.61354	4.74007	4.73537	5.60138	3.55392	6.25489
BnaA01g09520D	GSBRNA2G00131364001	chrA01:4672711-4674196	1404	17.9092	25.0379	29.5452	26.7871	41.9007	48.6761	28.2044	32.9841	30.78	36.8359	55.7278
BnaA01g09740D	GSBRNA2G00131394001	chrA01:4791577-4794321	1764	20.1281	24.6293	23.5415	27.196	50.1881	80.7063	22.7022	24.1837	41.3584	57.325	63.1502
BnaA01g09840D	GSBRNA2G00131406001	chrA01:4841682-4845723	3635	0.921042	1.10862	0.778322	1.03611	0.986889	0.331892	0.928811	0.571697	0.698246	0.406802	0.108105
BnaA01g09890D	GSBRNA2G00131413001	chrA01:4875009-4877755	1944	23.4987	29.7981	23.8805	23.4496	12.3056	15.3615	28.4455	27.3257	24.8649	14.1583	8.02734
BnaA01g09940D	GSBRNA2G00131419001	chrA01:4897671-4899199	991	7.70903	7.68746	6.44431	5.94973	15.3752	17.9267	6.34948	6.94504	7.50663	14.2589	17.4192
BnaA01g10000D	GSBRNA2G00131428001	chrA01:4969523-4976700	1626	69.4696	40.5277	57.8727	41.8292	26.093	37.5579	44.6343	43.9368	36.0642	30.6155	8.12661
BnaA01g10230D	GSBRNA2G00131457001	chrA01:5078289-5081411	2005	26.1566	24.2016	24.0953	21.8735	14.7104	20.7819	23.5876	22.1993	21.5771	20.4991	8.67622
BnaA01g10530D	GSBRNA2G00131506001	chrA01:5269983-5274643	2354	19.9934	25.5121	25.0305	28.8393	16.7828	19.3443	23.6697	23.8457	22.3841	22.0271	8.08934
BnaA01g10580D	GSBRNA2G00131511001	chrA01:5288016-5289864	1004	14.8636	21.7368	20.7397	20.1916	24.0741	25.5184	23.9273	24.4677	22.9695	22.3909	28.7386
BnaA01g10780D	GSBRNA2G00131539001	chrA01:5392561-5394801	1749	10.3568	39.4115	35.8398	36.1379	37.8965	38.1141	35.491	42.1775	41.2002	24.1128	45.7804
BnaA01g11090D	GSBRNA2G00131573001	chrA01:5523215-5526372	2086	5.82959	4.75869	5.76797	5.46756	7.78266	4.86202	6.46583	5.21226	5.93094	7.74136	12.0476
BnaA01g11700D	GSBRNA2G00131646001	chrA01:5839815-5840637	822	18.6966	18.6778	16.0022	9.99809	7.34125	13.4947	10.0655	14.5702	14.0583	8.76542	3.91196
BnaA01g11800D	GSBRNA2G00131658001	chrA01:5895774-5897782	1265	42.8556	49.9238	41.4327	82.2089	87.8632	27.507	79.9544	40.575	81.7763	85.4137	230.209
BnaA01g11840D	GSBRNA2G00131663001	chrA01:5912555-5914212	1482	19.8632	16.2487	16.5743	17.3862	10.1455	13.0251	10.9378	10.1329	16.7855	14.3128	5.91503
BnaA01g11930D	GSBRNA2G00131675001	chrA01:5991222-5995308	2521	9.23565	8.06714	10.035	11.2101	6.11681	5.11352	9.71753	8.68265	8.82684	7.80921	3.10194
BnaA01g11960D	GSBRNA2G00131679001	chrA01:6001929-6002661	638	20.29	23.0137	20.5792	19.3855	16.2047	17.8156	17.2587	24.7126	19.0448	12.792	3.8217
BnaA01g12020D	GSBRNA2G00131686001	chrA01:6021957-6025815	2589	1.44842	1.64049	1.42562	1.70949	2.21393	1.44119	3.09792	1.51682	1.89913	2.44317	8.58653
BnaA01g12190D	GSBRNA2G00131708001	chrA01:6093981-6094912	766	27.6362	26.9557	22.7393	26.2503	20.642	16.0111	23.3709	26.0282	23.4004	12.9392	8.8751
BnaA01g12340D	GSBRNA2G00131733001	chrA01:6165883-6166560	677	30.4892	39.1519	36.7249	44.4735	97.6392	93.529	36.3188	56.8381	49.5019	112.937	81.8156
BnaA01g12810D	GSBRNA2G00072682001	chrA01:6406897-6410995	1469	99.0086	85.2659	92.3769	101.968	57.6544	78.043	82.3475	85.2447	84.3401	77.3041	19.9593
BnaA01g12820D	GSBRNA2G00072680001	chrA01:6415877-6418010	1386	2.98486	2.63635	2.6939	2.64117	2.24499	1.8875	3.18653	3.11327	2.73479	1.87142	0.571847
BnaA01g13040D	GSBRNA2G00079527001	chrA01:6525257-6528861	1236	9.6158	9.80669	7.84563	9.01197	5.85767	4.66926	8.7068	9.03053	8.23245	5.7517	3.49385
BnaA01g13110D	GSBRNA2G00079538001	chrA01:6572653-6573367	641	45.3702	40.978	22.7694	19.0445	7.49518	13.7538	14.7081	32.4353	35.1998	6.1697	0.683539
BnaA01g13130D	GSBRNA2G00079541001	chrA01:6592410-6595503	1714	13.3232	11.9949	11.9859	12.5803	10.2338	9.17952	13.5203	12.4025	13.2842	12.5535	5.70774
BnaA01g13220D	GSBRNA2G00079555001	chrA01:6643653-6649076	3394	2.41201	2.61518	2.32016	2.37435	1.47502	2.39439	1.73899	2.06725	2.53104	1.38785	0.782455
BnaA01g13460D	GSBRNA2G00087833001	chrA01:6846836-6849897	1498	1.26357	1.4285	1.94393	2.07226	3.02089	2.20704	2.4483	1.49413	2.31149	2.24459	6.07585
BnaA01g13620D	GSBRNA2G00056286001	chrA01:6926887-6930505	1636	0.466089	1.09443	1.04102	1.50584	2.29172	1.34598	2.10952	1.41225	1.59549	2.32114	5.88769
BnaA01g13890D	GSBRNA2G00056317001	chrA01:7049347-7051996	2026	17.4728	16.0744	16.4516	14.1233	8.71875	13.7569	17.0322	14.777	14.7221	11.0643	4.28718
BnaA01g13950D	GSBRNA2G00056325001	chrA01:7087664-7088722	1058	0.712194	4.71484	3.71284	9.48772	9.36824	10.0572	3.66917	7.77928	12.7715	8.77068	4.32942
BnaA01g14010D	GSBRNA2G00056333001	chrA01:7116843-7118074	859	15.2865	657.398	645.604	518.735	943.878	1137.26	546.368	686.24	677.247	379.271	933.639
BnaA01g14080D	GSBRNA2G00056344001	chrA01:7159254-7162029	931	5.09167	4.12115	4.81873	4.72183	5.70806	5.93923	5.37898	4.74371	4.77275	6.8165	12.9366
BnaA01g14130D	GSBRNA2G00056349001	chrA01:7182265-7184135	1551	6.26218	2.87956	2.70726	7.25003	5.082	2.3065	4.01526	2.92807	3.89272	4.53689	12.931
BnaA01g14240D	GSBRNA2G00056360001	chrA01:7213300-7216393	2161	2.70987	2.07102	2.82988	2.92514	1.48027	1.68498	2.91527	2.01425	2.55642	2.14695	0.703562
BnaA01g14270D	GSBRNA2G00056363001	chrA01:7222057-7223180	906	39.4456	34.5333	39.4503	37.9845	58.2141	45.5894	36.3142	41.6777	38.2814	56.4277	87.3236
BnaA01g14450D	GSBRNA2G00056381001	chrA01:7296381-7299947	1342	62.1086	85.9927	48.3881	47.5057	9.2264	26.2171	36.5982	89.4115	34.5457	7.21236	26.4257
BnaA01g14490D	GSBRNA2G00056385001	chrA01:7306476-7308003	1251	2.23931	10.3077	13.9828	11.2728	13.221	17.5202	11.2522	15.0287	15.508	8.17648	19.8142
BnaA01g14690D	GSBRNA2G00149672001	chrA01:7393829-7395712	873	1.93376	1.52107	2.03414	1.67437	2.91451	2.51949	2.66799	1.2451	2.44848	2.84459	6.86937
BnaA01g14720D	GSBRNA2G00149668001	chrA01:7417401-7420350	1682	9.76784	9.4562	10.5577	12.2897	12.9162	7.97944	4.53054	5.97948	8.55456	6.86098	3.82733
BnaA01g14860D	GSBRNA2G00149647001	chrA01:7502403-7504799	1221	56.4152	53.1244	50.4862	58.7122	52.8039	46.5266	35.2234	43.601	48.4628	34.1089	20.7078
BnaA01g14870D	GSBRNA2G00149646001	chrA01:7505306-7509090	1801	6.93436	6.44649	7.69673	7.48792	5.68352	6.93727	6.84681	7.4732	5.89256	5.40447	2.14063
BnaA01g15000D	GSBRNA2G00149628001	chrA01:7620768-7622405	1016	50.9971	67.3898	78.6675	97.939	183.614	243.72	43.9056	67.9683	100.474	189.302	230.72
BnaA01g15040D	GSBRNA2G00149623001	chrA01:7654324-7658644	1293	0.484151	0.73989	0.663291	1.02814	1.99843	1.872	1.05711	1.22714	1.23099	1.4713	11.2778
BnaA01g15090D	GSBRNA2G00149616001	chrA01:7692787-7696164	1156	1.24926	38.5824	58.1133	31.223	72.9443	110.217	43.787	48.6135	47.2456	25.3928	64.5636
BnaA01g15110D	GSBRNA2G00149613001	chrA01:7699569-7702740	2060	6.32528	4.07611	4.83343	3.75537	3.33917	5.4964	4.39484	4.00035	4.63547	4.66875	1.15602
BnaA01g15130D	GSBRNA2G00149611001	chrA01:7705582-7711689	3991	2.02393	2.93496	2.57426	2.96851	4.36952	2.55411	2.7821	1.74553	2.41338	2.68442	5.01196
BnaA01g15330D	GSBRNA2G00149589001	chrA01:7838363-7845883	2378	1.96572	1.34009	1.68029	1.98235	0.741918	0.92266	2.2427	1.71993	1.47154	1.0263	0.536668
BnaA01g15430D	GSBRNA2G00149576001	chrA01:7910385-7911375	939	61.5649	70.7506	51.8303	53.4994	38.3065	39.1616	54.7826	62.5046	53.4881	27.8482	12.2797
BnaA01g15870D	GSBRNA2G00149521001	chrA01:8150161-8152894	1457	11.3164	10.4571	11.3035	10.8717	13.7519	15.4242	12.0191	14.3633	11.7718	15.6234	21.5921
BnaA01g16070D	GSBRNA2G00149500001	chrA01:8227777-8237311	7278	1.50892	1.5089	1.67849	1.59725	0.877213	1.11506	0.804451	0.931563	1.40331	0.724423	0.424053
BnaA01g16370D	GSBRNA2G00149459001	chrA01:8442364-8444225	1102	14.159	33.1732	35.8593	28.8477	46.2102	57.1535	32.8647	35.623	35.3956	27.2397	55.7746
BnaA01g16530D	GSBRNA2G00149436001	chrA01:8561351-8562486	1049	17.7107	17.8875	13.3282	18.6634	24.883	23.9532	22.3926	16.8969	20.7206	16.9519	35.2149
BnaA01g16600D	GSBRNA2G00149424001	chrA01:8591893-8594531	2090	4.87617	8.86896	9.56473	7.69318	9.02341	9.65239	9.90267	8.94185	9.23395	7.33831	9.55208
BnaA01g16670D	GSBRNA2G00149415001	chrA01:8692976-8694694	1351	0.86352	31.2958	33.4313	29.2037	47.8202	57.6277	30.6766	31.0524	36.6469	23.8244	64.6306
BnaA01g17140D	GSBRNA2G00051722001	chrA01:9007656-9011549	2550	2.10768	1.65902	2.18519	2.26989	3.73373	2.09477	1.65506	1.55134	2.08426	3.93615	6.14586
BnaA01g17560D	GSBRNA2G00051664001	chrA01:9282574-9284696	1285	45.9331	36.6819	41.046	36.4277	61.6259	49.1253	35.8703	40.7562	37.0726	59.2309	110.425
BnaA01g17710D	GSBRNA2G00051643001	chrA01:9388224-9388847	623	2.31773	2.44011	3.79747	5.5346	8.35863	5.89274	3.2223	2.85198	2.908	5.40728	9.32305
BnaA01g18050D	GSBRNA2G00075726001	chrA01:9544373-9545090	717	1.2859	2.17844	2.97522	2.50548	2.62718	0.375427	5.41042	3.36061	2.88659	2.7803	8.13262
BnaA01g18510D	GSBRNA2G00021283001	chrA01:10010956-10011814	705	12.5021	5.38455	9.40873	6.25001	5.89889	3.76372	3.90919	6.56034	7.37743	9.88046	2.40514
BnaA01g18660D	GSBRNA2G00021310001	chrA01:10171435-10172779	1344	8.03236	6.01277	6.85756	7.10645	9.77345	9.49757	7.62963	5.35558	6.13763	9.9082	16.3588
BnaA01g18740D	GSBRNA2G00021319001	chrA01:10229859-10230735	876	19.4122	10.388	8.92949	22.3807	16.6169	23.4177	40.1099	18.5671	42.8928	41.905	52.7071
BnaA01g18970D	GSBRNA2G00043626001	chrA01:10419899-10424889	4683	1.21314	1.09364	1.15479	1.30418	0.317464	0.308704	1.30551	1.08254	1.17865	0.443756	0.16162
BnaA01g19040D	GSBRNA2G00043617001	chrA01:10512286-10513794	1028	0.787775	0.805902	0.182716	1.04518	1.31735	2.04208	2.52438	1.35044	2.32845	2.07931	14.7261
BnaA01g19230D	GSBRNA2G00043579001	chrA01:10787600-10791817	2508	14.3853	13.0115	13.2727	14.1853	6.20975	9.76537	13.0541	13.8538	14.5952	8.80882	3.53734
BnaA01g19350D	GSBRNA2G00054038001	chrA01:10880347-10883199	502	1.49935	2.84442	3.5739	2.6854	8.7822	2.35584	2.9708	1.75578	3.47796	5.34801	10.0256
BnaA01g19590D	GSBRNA2G00054065001	chrA01:10995229-10996312	1083	1.85916	2.02284	2.09551	1.87321	3.48113	3.53386	1.29516	1.9551	2.26696	3.1411	5.3811
BnaA01g19790D	GSBRNA2G00138404001	chrA01:11274036-11279544	3736	9.91953	7.62928	9.52372	12.3271	10.9002	10.0191	12.0915	8.98218	12.6122	14.6533	18.9566
BnaA01g19850D	GSBRNA2G00138420001	chrA01:11464957-11467265	1386	1.0949	23.3503	26.7409	20.4829	35.8911	42.5238	21.0008	25.9859	28.0425	17.3925	44.2129
BnaA01g19870D	GSBRNA2G00138423001	chrA01:11512471-11514458	1987	6.54379	11.9085	10.3691	16.247	15.5646	18.4264	11.6953	12.5918	20.878	18.9588	12.7933
BnaA01g20020D	GSBRNA2G00138447001	chrA01:11619685-11621360	1313	0.0561503	1.31231	2.05092	1.61228	1.96795	3.46165	1.61445	1.87306	1.22326	1.30538	2.80753
BnaA01g20450D	GSBRNA2G00138533001	chrA01:12328140-12329223	1083	4.17608	4.03959	2.78263	2.56791	3.7114	4.4064	3.09395	3.71865	3.64099	4.13069	9.17706
BnaA01g20560D	GSBRNA2G00138546001	chrA01:12446013-12447219	1206	14.6312	7.32848	11.7612	10.4942	9.77093	14.03	10.83	8.65862	11.4668	7.6002	3.6926
BnaA01g20660D	GSBRNA2G00138557001	chrA01:12506390-12514305	1165	0.801841	0.43068	0.507316	0.30952	1.27749	3.22832	0.481874	0.706599	1.14248	2.09665	4.7295
BnaA01g21090D	GSBRNA2G00138619001	chrA01:12967972-12968687	537	0.877862	4.88852	3.46396	8.41714	22.5848	65.3774	2.73122	5.80551	18.0031	23.6549	33.875
BnaA01g21220D	GSBRNA2G00138638001	chrA01:13078763-13079978	1215	25.4723	21.7233	29.9627	26.9761	52.7391	47.6133	30.7094	23.7562	21.6527	56.6946	70.0952
BnaA01g21510D	GSBRNA2G00024195001	chrA01:13675326-13679595	2748	0.935503	1.01789	1.24815	1.36017	1.66723	1.77292	1.21791	1.29724	1.3292	1.40297	2.52402
BnaA01g21610D	GSBRNA2G00024213001	chrA01:13888425-13889250	825	0.793046	45.123	54.2959	38.0183	76.5782	97.8155	47.522	46.8501	53.6221	38.3244	89.7734
BnaA01g22050D	GSBRNA2G00026799001	chrA01:14377156-14379673	2430	2.66034	3.44297	3.05881	4.48595	4.57182	6.17134	2.82992	3.94323	4.46683	5.79475	5.12668
BnaA01g22460D	GSBRNA2G00026859001	chrA01:14832528-14834836	1283	6.14868	6.18805	5.58594	4.86814	4.07615	3.64342	4.91178	5.40358	5.5179	4.67489	1.98624
BnaA01g22500D	GSBRNA2G00026863001	chrA01:14849828-14851375	1081	7.87164	7.07804	6.98839	7.74196	5.62484	5.10503	5.27786	5.92057	6.54833	4.06255	2.63054
BnaA01g22670D	GSBRNA2G00087676001	chrA01:14967793-14969028	1059	24.7286	32.702	21.5072	22.0264	15.5426	8.94212	19.7752	29.8103	20.9927	14.8822	7.99139
BnaA01g22700D	GSBRNA2G00087683001	chrA01:15012168-15012396	228	21.6446	1230.71	834.272	950.335	1338.75	1339.69	884.721	1139.21	945.794	629.896	1636.36
BnaA01g22900D	GSBRNA2G00086855001	chrA01:15244579-15246305	1383	0.703469	35.0294	32.5245	31.2524	38.2746	43.3412	28.3804	32.7357	32.8282	21.8267	57.779
BnaA01g22920D	GSBRNA2G00086858001	chrA01:15254816-15263397	1938	34.8991	29.8716	23.9451	23.1594	17.9823	24.1958	23.0568	24.6361	30.3774	33.9611	9.98522
BnaA01g23120D	GSBRNA2G00083394001	chrA01:15516331-15519295	1324	5.09325	6.04484	5.07942	6.33861	3.7013	3.28474	5.10021	5.98127	4.85606	3.6373	1.45031
BnaA01g23600D	GSBRNA2G00002593001	chrA01:15935459-15936632	1010	11.2263	9.57432	10.8154	11.5498	6.23625	6.919	11.6788	11.1228	9.45625	8.67831	3.18135
BnaA01g23660D	GSBRNA2G00002609001	chrA01:16094116-16096020	1196	8.65193	7.68079	7.34095	8.56113	8.30874	5.64927	5.20761	6.8161	7.78361	5.71457	3.75094
BnaA01g24360D	GSBRNA2G00056215001	chrA01:16755149-16758203	3054	93.1979	103.954	104.923	115.569	183.81	224.962	93.236	105.616	121.442	210.682	201.517
BnaA01g24730D	GSBRNA2G00056281001	chrA01:17119906-17120721	815	125.066	126.029	100.399	101.02	73.9293	77.0414	107.194	121.827	107.748	79.2431	57.017
BnaA01g24820D	GSBRNA2G00068022001	chrA01:17183404-17187089	1762	21.7078	22.7074	16.751	16.4647	11.3563	13.836	15.0962	16.831	19.1124	15.2965	8.84086
BnaA01g25000D	GSBRNA2G00063794001	chrA01:17493143-17493894	751	13.3386	11.494	13.2119	17.8424	14.8309	9.37353	24.6438	14.1288	13.4218	15.8664	4.77223
BnaA01g25310D	GSBRNA2G00063834001	chrA01:17711929-17718009	3478	0.204037	3.02812	3.88251	2.39523	4.13673	6.56302	3.89708	3.02218	3.19201	2.37177	5.27329
BnaA01g25950D	GSBRNA2G00074412001	chrA01:18106774-18108338	812	6.17679	3.65508	2.94753	3.29086	2.5397	3.69913	4.47362	5.92074	5.36007	2.17499	1.94485
BnaA01g26320D	GSBRNA2G00005599001	chrA01:18388708-18391231	1917	0.598163	34.3776	41.6682	27.8105	55.0993	61.182	40.2788	40.2883	36.3073	27.4926	50.9582
BnaA01g26430D	GSBRNA2G00005582001	chrA01:18512329-18517546	1671	187.372	162.474	130.638	114.143	88.6469	107.429	101.883	129.439	118.94	150.869	33.0244
BnaA01g26480D	GSBRNA2G00005576001	chrA01:18549643-18553027	2254	0.795449	38.887	43.2479	33.2552	68.5278	79.0369	38.4291	39.4485	42.5478	37.059	92.7908
BnaA01g26600D	GSBRNA2G00005561001	chrA01:18643184-18647018	1983	5.77964	3.25147	4.44879	3.99794	2.12551	1.65228	4.01981	4.53745	5.40599	2.95207	0.631223
BnaA01g26720D	GSBRNA2G00005544001	chrA01:18729254-18731163	1909	47.8825	41.893	45.8392	49.5156	61.3923	44.9493	76.1446	51.5627	57.1401	64.4687	100.077
BnaA01g27570D	GSBRNA2G00057562001	chrA01:19277300-19278558	1023	216.021	199.419	201.168	210.52	213.934	213.075	189.74	254.026	144.134	274.444	87.6621
BnaA01g28120D	GSBRNA2G00010064001	chrA01:19628915-19630477	951	74.5102	51.0892	36.505	36.1394	49.1418	64.7502	27.9417	28.371	23.3449	42.8511	11.9181
BnaA01g28460D	GSBRNA2G00010023001	chrA01:19838761-19842559	2809	11.4161	10.6454	10.6421	11.4726	5.03977	5.29714	11.4685	10.9894	10.9378	6.41445	4.42029
BnaA01g28690D	GSBRNA2G00009992001	chrA01:19946504-19948041	1409	2.28096	5.01897	4.77544	9.73895	9.07129	9.16833	4.4862	9.57745	10.862	10.5708	3.48825
BnaA01g28710D	GSBRNA2G00009990001	chrA01:19953975-19955860	1535	5.144	2.85207	3.53743	2.15434	1.65251	2.5017	1.75251	2.77542	3.73734	2.12957	1.32542
BnaA01g28970D	GSBRNA2G00009958001	chrA01:20101167-20102186	1019	0.968548	1.56414	1.56718	1.96155	3.06924	2.5123	1.9255	2.22736	2.51563	3.24115	5.81827
BnaA01g29000D	GSBRNA2G00009955001	chrA01:20113530-20115119	1089	41.1622	30.1121	33.1773	23.5672	16.9727	23.4569	24.6747	25.3241	31.2807	25.2533	10.7119
BnaA01g29290D	GSBRNA2G00009921001	chrA01:20229660-20232769	2145	0.673592	1.50376	1.02745	1.78327	4.05438	7.38941	1.32872	1.38978	2.90583	4.65975	6.6452
BnaA01g29390D	GSBRNA2G00067283001	chrA01:20329203-20331002	1662	1.51645	1.62809	1.66569	3.47362	3.59134	2.28614	2.97438	3.37909	2.72537	5.48739	2.38031
BnaA01g29460D	GSBRNA2G00067270001	chrA01:20384060-20388440	2554	62.2894	50.5042	61.2168	60.1089	92.6544	99.3823	54.7488	55.4672	59.7663	120.243	119.178
BnaA01g29600D	GSBRNA2G00067250001	chrA01:20480045-20481394	604	1.82324	1.85136	2.17191	2.98469	5.85462	4.89414	1.93153	2.44344	5.65259	3.86058	6.46385
BnaA01g29610D	GSBRNA2G00067249001	chrA01:20482330-20484655	2028	3.70742	4.61507	4.80706	5.71878	6.01652	6.16261	4.59607	5.19042	6.6073	6.92181	7.21047
BnaA01g29630D	GSBRNA2G00067247001	chrA01:20485423-20487952	2529	79.4543	70.1075	71.4227	63.3767	52.8802	70.6859	67.1738	68.5878	65.4591	70.3795	35.2422
BnaA01g29640D	GSBRNA2G00067246001	chrA01:20488988-20489379	391	4.20031	3.78129	2.3557	5.04067	8.16009	10.0718	6.6585	4.03239	9.40497	7.80544	16.5027
BnaA01g29830D	GSBRNA2G00076418001	chrA01:20617654-20620584	1812	5.98168	331.604	320.777	280.968	455.727	468.36	281.064	327.281	366.764	227.626	552.551
BnaA01g29870D	GSBRNA2G00076422001	chrA01:20629015-20631958	1843	5.91909	6.88941	6.30253	7.37845	7.64403	8.93007	7.06763	7.33252	7.88801	11.0739	12.2403
BnaA01g30340D	GSBRNA2G00076481001	chrA01:20844512-20846132	1072	17.6327	18.8156	15.8684	15.3923	12.9064	9.25311	14.9642	19.384	16.2338	11.6422	5.03744
BnaA01g30380D	GSBRNA2G00096968001	chrA01:20865811-20868034	1719	0.555458	3.34427	3.44024	3.23455	6.48905	6.87194	4.09031	3.95019	4.31709	3.0958	7.00266
BnaA01g30490D	GSBRNA2G00096953001	chrA01:20924062-20926784	2025	2.34593	5.56439	4.81446	6.94226	5.91759	3.23344	2.55733	3.47598	5.56775	5.80359	6.08248
BnaA01g30570D	GSBRNA2G00096945001	chrA01:20946445-20947570	705	15.1978	16.7343	13.7037	13.8555	16.1813	13.174	19.0612	15.489	18.8427	18.0049	32.1115
BnaA01g30830D	GSBRNA2G00097000001	chrA01:21042513-21043895	1224	1.6485	2.37057	9.0742	4.11692	8.30885	1.89451	6.04468	2.01209	3.67217	4.17457	7.30991
BnaA01g31320D	GSBRNA2G00060256001	chrA01:21292551-21293392	841	30.1585	38.1906	44.4703	46.8023	63.1148	50.8825	32.1204	42.5765	28.2717	72.6925	100.184
BnaA01g32460D	GSBRNA2G00057489001	chrA01:21871502-21872528	747	1.39027	2.19453	1.7862	3.8417	11.245	10.3694	1.90273	2.78619	5.96799	6.17757	9.74783
BnaA01g32580D	GSBRNA2G00057504001	chrA01:21980100-21982473	1818	0.285304	11.0426	14.8877	12.1274	10.8761	17.052	10.1532	15.0008	24.2631	6.50158	17.1643
BnaA01g32740D	GSBRNA2G00057522001	chrA01:22124389-22125361	822	16.0205	16.2566	14.6881	12.0704	4.9557	6.74669	12.9341	16.3702	12.9557	5.91861	2.629
BnaA01g32760D	GSBRNA2G00057526001	chrA01:22129827-22133863	1715	9.65787	10.0092	8.80876	9.39788	2.55837	5.46877	10.1532	10.1349	8.67453	4.89123	2.1339
BnaA01g33120D	GSBRNA2G00057233001	chrA01:22395830-22398617	1799	5.62131	4.78112	5.52103	6.20136	3.70761	4.00692	6.31156	5.54031	6.00793	3.92444	1.98063
BnaA01g33220D	GSBRNA2G00057220001	chrA01:22550449-22553512	1917	14.8253	11.8972	11.0943	12.1392	9.69802	10.6279	12.9529	12.5082	13.3883	11.9498	6.49666
BnaA01g33270D	GSBRNA2G00057215001	chrA01:22565104-22567710	2032	0.222708	8.2336	10.3713	7.84043	9.68897	12.3186	7.98889	8.84741	6.43067	6.47886	14.6727
BnaA01g33290D	GSBRNA2G00057212001	chrA01:22572651-22574155	1290	2.10238	2.37927	2.17071	3.33789	3.9923	2.09834	2.26318	1.94349	2.36221	2.87501	6.04254
BnaA01g33910D	GSBRNA2G00015350001	chrA01:22953667-22954456	549	0.906679	24.5172	24.4243	23.4273	40.8199	47.8401	24.4354	27.0309	27.7516	20.3775	53.5796
BnaA01g34130D	GSBRNA2G00015374001	chrA01:23054503-23056098	1595	82.5496	86.0248	87.2055	76.6687	203.312	174.634	69.512	90.5899	45.4212	150.448	259.883
BnaA01g34170D	GSBRNA2G00015387001	chrA01:23073470-23074406	936	2.0571	1.60561	1.31321	12.9559	9.52696	10.6659	4.96141	9.39255	2.34928	7.20478	15.0722
BnaA01g34180D	GSBRNA2G00015388001	chrA01:23074474-23074943	450	2.58867	1.98371	1.48874	12.6811	9.86208	11.8011	6.77732	14.0989	3.27319	7.8626	14.92
BnaA01g34730D	GSBRNA2G00013852001	chrA01_random:91515-92811	845	17.2572	14.9287	15.2853	12.7369	6.5732	9.04471	9.20225	14.0337	13.5272	9.55292	6.07826
BnaA01g34740D	GSBRNA2G00093059001	chrA01_random:106041-108591	1665	7.87887	7.87671	6.53642	8.16556	7.93102	6.2744	5.08753	6.57471	7.7498	6.88697	3.27101
BnaA01g34970D	GSBRNA2G00068443001	chrA01_random:293111-294785	714	94.0205	113.182	83.2543	85.8447	54.5325	44.4472	77.7266	88.2918	89.2379	39.7967	15.0725
BnaA01g35000D	GSBRNA2G00025606001	chrA01_random:334355-335649	786	106.988	97.2895	97.1027	74.9417	61.0534	115.933	95.6391	120.004	100.104	83.8651	29.4
BnaA01g35060D	GSBRNA2G00053446001	chrA01_random:363569-366449	1272	13.6512	14.6629	10.0761	11.5737	3.99232	7.01845	9.92968	9.23159	15.2607	5.04318	1.15193
BnaA01g35070D	GSBRNA2G00055555001	chrA01_random:381248-385878	1698	23.8444	25.644	19.3297	16.7519	8.23499	11.1623	12.0317	20.4743	19.4352	6.66811	2.16367
BnaA01g35130D	GSBRNA2G00030393001	chrA01_random:418096-427796	4687	5.07318	5.2647	5.08838	5.73893	3.15069	3.5408	5.36148	5.56799	5.58727	3.43865	1.97037
BnaA01g35420D	GSBRNA2G00028280001	chrA01_random:593881-595767	1838	8.87155	14.8038	16.9213	15.4616	18.381	19.2091	14.5187	16.5249	18.6265	13.9162	23.6175
BnaA01g35580D	GSBRNA2G00092965001	chrA01_random:791249-794425	1556	8.75914	9.57519	6.76529	8.29407	4.01008	4.90236	7.3994	8.72112	8.49324	3.8333	2.10294
BnaA01g35710D	GSBRNA2G00096505001	chrA01_random:939483-941298	811	77.8088	68.4519	71.3301	64.8461	92.7304	85.6233	56.1795	76.2081	73.9857	88.9428	185.378
BnaA01g35910D	GSBRNA2G00005181001	chrA01_random:1411055-1413474	1128	23.5786	22.4042	25.7559	28.2303	47.4139	47.3733	24.8358	29.8625	27.202	49.013	54.0426
BnaA01g36300D	GSBRNA2G00027978001	chrA01_random:1748327-1749587	734	21.5077	20.5475	23.2334	19.9976	11.6079	14.8475	23.4743	21.6767	16.9591	16.4601	8.54862
BnaA01g36400D	GSBRNA2G00017053001	chrA01_random:1960991-1965651	2830	0.597549	22.2572	22.9419	18.8564	36.1783	40.0005	22.4108	22.7967	25.8311	19.959	45.1601
BnaA01g36880D	GSBRNA2G00019826001	chrA01_random:2336969-2337683	714	11.3303	13.4556	12.1758	15.3721	9.83435	15.366	11.1655	13.8944	12.6922	15.0562	3.62197
BnaA01g36890D	GSBRNA2G00033635001	chrA01_random:2353202-2355804	2277	64.9531	44.7689	57.9427	46.4695	31.9831	36.8838	55.1158	50.3212	40.9261	43.3932	16.1756
BnaA01g36950D	GSBRNA2G00037860001	chrA01_random:2394482-2398492	1707	5.27808	4.82128	5.42164	4.96706	5.79503	7.2878	3.84811	4.38858	3.91427	7.03386	13.1332
BnaA01g37010D	GSBRNA2G00067660001	chrA01_random:2426695-2428933	1429	5.38894	3.88712	4.14261	3.49837	2.07121	2.30353	3.11577	2.65561	2.38725	3.17666	0.606692
BnaA01g37180D	GSBRNA2G00004097001	chrA01_random:2528337-2529223	886	13.3892	12.5033	9.47993	11.5565	9.28712	14.5632	14.4267	10.4648	14.2906	9.79861	3.80898
BnaA01g37200D	GSBRNA2G00004099001	chrA01_random:2530807-2533759	1551	12.0376	11.202	12.0715	13.2347	7.05417	9.69078	10.4581	9.70597	10.6919	10.9662	2.4999
BnaA02g00140D	GSBRNA2G00143559001	chrA02:50114-50759	645	1.08506	1.61782	0.557416	0.503073	1.13394	2.28563	1.13648	0.864202	1.89714	2.23148	16.7739
BnaA02g00670D	GSBRNA2G00143498001	chrA02:252492-254660	1633	13.6077	11.1338	8.06801	8.56956	5.99272	3.95414	13.8451	10.8645	5.33076	11.4651	6.09838
BnaA02g01140D	GSBRNA2G00143441001	chrA02:498765-499547	593	3.59271	3.74968	4.84699	2.61839	5.83384	7.07326	3.8448	4.35663	3.85881	5.383	13.4323
BnaA02g01510D	GSBRNA2G00143397001	chrA02:693413-695117	1154	23.253	28.2397	23.9376	33.4797	59.7904	56.2391	23.6695	29.0459	36.8086	52.5991	90.0879
BnaA02g01520D	GSBRNA2G00143396001	chrA02:701551-703721	939	13.1598	10.4785	12.4898	11.7085	19.659	19.5403	11.2156	12.0051	12.8742	22.1717	25.529
BnaA02g01650D	GSBRNA2G00143380001	chrA02:763007-764991	1512	45.8245	34.8581	42.2785	39.8679	23.1124	27.3237	29.6998	37.3021	34.0306	32.7444	15.7288
BnaA02g01730D	GSBRNA2G00143370001	chrA02:798015-802011	3348	2.38935	2.16672	2.53381	2.06481	1.28403	1.60994	1.9889	1.93053	2.39494	1.98815	0.791011
BnaA02g01870D	GSBRNA2G00143355001	chrA02:852150-853992	1842	9.47154	6.98296	7.977	5.48717	5.20873	4.0198	6.35107	5.17025	4.78179	7.43205	4.17386
BnaA02g02290D	GSBRNA2G00143304001	chrA02:1008947-1013526	1466	614.722	626.861	549.97	513.745	349.534	430.475	604.411	627.902	568.591	427.047	238.289
BnaA02g02460D	GSBRNA2G00143287001	chrA02:1084193-1086329	1680	10.4384	11.2267	11.0423	11.0962	7.54004	8.99689	11.9006	12.5505	9.75435	9.29756	4.4488
BnaA02g02490D	GSBRNA2G00143284001	chrA02:1094121-1096340	1813	0.252713	6.91433	10.8414	6.15231	4.46065	10.4271	4.7055	9.38026	11.6608	1.83541	4.39352
BnaA02g02710D	GSBRNA2G00143255001	chrA02:1220661-1223001	1485	11.8614	10.7162	11.8083	14.283	19.216	19.4584	11.5594	13.7428	14.2385	18.8463	22.3936
BnaA02g02970D	GSBRNA2G00143224001	chrA02:1313417-1315459	1557	0.78056	33.7344	50.5436	49.31	33.2953	61.5888	46.0292	41.6393	52.6672	30.7512	129.848
BnaA02g03050D	GSBRNA2G00143215001	chrA02:1342359-1343163	630	57.0007	55.8346	54.6798	56.8207	108.816	127.329	39.5434	54.3342	63.5743	101.601	113.248
BnaA02g03310D	GSBRNA2G00143181001	chrA02:1469411-1475092	3297	0.277258	0.260949	0.322569	0.311439	0.530618	1.13198	0.344212	0.307989	0.547787	0.551802	0.971638
BnaA02g04080D	GSBRNA2G00010269001	chrA02:1832279-1839358	3538	5.99439	6.07385	8.06804	7.62059	8.81679	9.7008	7.57469	7.4706	9.0349	15.3756	12.0207
BnaA02g04170D	GSBRNA2G00081068001	chrA02:1865798-1868113	1803	1.03045	42.659	42.1957	38.0972	63.9954	78.6236	39.4384	40.7705	43.5845	34.9546	81.6454
BnaA02g04760D	GSBRNA2G00081382001	chrA02:2113033-2114146	756	3.37921	164.516	169.959	137.681	208.247	255.355	137.766	166.981	169.049	98.6657	261.03
BnaA02g05040D	GSBRNA2G00081347001	chrA02:2241137-2242470	1231	628.11	646.146	560.267	532.169	354.58	427.413	529.348	604.664	541.981	345.191	235.791
BnaA02g05240D	GSBRNA2G00001315001	chrA02:2381321-2385250	1991	23.0025	15.9889	18.4691	17.3401	16.39	13.2131	15.2475	20.8802	13.8391	16.6812	6.14806
BnaA02g05290D	GSBRNA2G00001321001	chrA02:2403186-2408757	3097	9.20582	8.30211	9.45725	8.56427	7.6063	9.86695	9.7601	9.22148	9.30524	10.1329	20.7747
BnaA02g05360D	GSBRNA2G00001330001	chrA02:2443829-2444921	1006	14.3106	18.2633	12.5256	13.3143	5.69985	9.49463	16.4275	15.6202	13.3883	9.04338	6.20266
BnaA02g05410D	GSBRNA2G00001337001	chrA02:2480806-2483472	1604	3.31788	31.4346	35.4006	30.8637	45.0482	50.0555	31.3201	34.7275	40.0157	26.7926	54.3829
BnaA02g05540D	GSBRNA2G00001356001	chrA02:2554637-2556318	1032	12.909	9.40682	10.3274	12.0349	6.92765	10.5251	10.8862	10.7574	9.90299	8.4189	4.29773
BnaA02g05700D	GSBRNA2G00001373001	chrA02:2619047-2622386	1545	0.577081	0.35253	0.796063	0.444522	0.710558	1.30873	0.377441	0.818809	0.837469	0.838504	4.94428
BnaA02g05780D	GSBRNA2G00001383001	chrA02:2659723-2661379	1635	9.95999	8.55151	7.96188	6.14486	8.41792	6.05031	4.40347	7.68819	6.30506	7.44505	3.94429
BnaA02g05840D	GSBRNA2G00001389001	chrA02:2690163-2692981	1246	34.4631	30.6953	33.8936	37.8065	38.8507	27.1859	21.2343	27.0296	32.4648	23.1227	12.769
BnaA02g06160D	GSBRNA2G00001429001	chrA02:2877205-2881485	2772	24.6429	17.2584	22.8781	17.2368	11.3613	19.6812	19.7097	16.4415	11.5183	24.5004	3.18089
BnaA02g06460D	GSBRNA2G00001471001	chrA02:3087994-3091920	1893	1.30565	1.03038	1.46149	1.69919	1.96595	1.23628	1.2706	0.839093	1.65505	1.26244	3.45787
BnaA02g06580D	GSBRNA2G00001485001	chrA02:3141347-3143631	1958	12.3406	7.27333	12.5363	15.4422	8.03882	6.12603	19.3954	12.945	12.1297	10.5474	3.83414
BnaA02g06790D	GSBRNA2G00048022001	chrA02:3233536-3234019	483	3.54142	10.0256	6.23651	18.7271	46.313	29.3879	7.56042	13.9089	13.1148	31.5958	32.3929
BnaA02g06880D	GSBRNA2G00029761001	chrA02:3265338-3267293	1751	2.54259	3.96998	3.04292	4.91651	8.45599	6.39303	3.08222	2.95904	4.46566	8.97248	8.83609
BnaA02g07040D	GSBRNA2G00010708001	chrA02:3343064-3344753	1066	48.7249	42.86	52.8036	56.9895	109.091	129.295	47.8513	78.2346	55.4809	145.81	130.464
BnaA02g07080D	GSBRNA2G00010703001	chrA02:3356024-3358401	1370	0.507716	21.6496	22.8009	20.0555	29.8422	36.3548	17.4786	22.0889	21.7371	14.6182	33.5524
BnaA02g07120D	GSBRNA2G00052690001	chrA02:3392424-3393327	767	18.4356	26.1013	29.1103	30.1829	56.8549	21.1389	30.3293	50.5012	16.7581	40.9511	86.7574
BnaA02g07500D	GSBRNA2G00052731001	chrA02:3572470-3575785	1905	8.78414	11.8242	13.8917	12.3585	13.303	16.302	13.4472	12.8828	13.6016	14.7709	16.4777
BnaA02g07920D	GSBRNA2G00052781001	chrA02:3750092-3753377	2577	1.60132	69.1393	78.6001	60.3969	98.7731	103.317	70.3702	75.8373	80.052	51.9262	128.686
BnaA02g07990D	GSBRNA2G00052790001	chrA02:3784850-3788310	2944	8.19325	8.40629	7.41223	7.50001	5.14073	5.3576	7.52128	8.30705	8.14722	5.51246	2.8756
BnaA02g08060D	GSBRNA2G00052800001	chrA02:3805092-3806466	1148	4.71949	5.29933	4.97947	6.16655	10.3702	11.4243	5.17793	5.91881	6.14243	11.3682	20.6351
BnaA02g08090D	GSBRNA2G00052803001	chrA02:3811394-3815386	2464	12.2555	13.8167	14.3402	14.5477	26.2466	17.7367	11.7823	9.59091	12.1135	12.9384	23.6903
BnaA02g08160D	GSBRNA2G00088553001	chrA02:3869185-3874606	3285	38.0622	37.6767	32.4318	29.2052	20.548	20.9944	32.8026	32.4304	33.3166	23.0421	9.17698
BnaA02g08480D	GSBRNA2G00012909001	chrA02:4133018-4137651	2463	1.97906	91.6805	93.3784	80.5915	116.416	141.492	86.0837	97.9643	103.653	70.2653	171.016
BnaA02g08880D	GSBRNA2G00012972001	chrA02:4424523-4426142	1346	0.262393	0.502478	0.485618	0.86975	1.70819	0.407879	1.31863	0.722435	0.940031	1.36719	5.06688
BnaA02g09450D	GSBRNA2G00041393001	chrA02:4683934-4686978	1727	1.18808	4.30665	5.40026	4.69816	3.38413	5.24512	3.899	5.35342	5.98602	2.97601	5.16081
BnaA02g09460D	GSBRNA2G00041394001	chrA02:4687126-4689273	1374	319.379	320.92	249.68	255.467	271.664	176.705	268.426	299.981	291.911	153.766	127.523
BnaA02g09520D	GSBRNA2G00041404001	chrA02:4725755-4727006	861	6.81841	6.46499	5.22815	4.68536	5.09311	3.47784	4.32005	4.76211	4.82257	3.37443	1.68867
BnaA02g09590D	GSBRNA2G00041412001	chrA02:4811612-4812202	590	10.7154	28.6027	22.8666	42.0989	41.383	42.2297	26.9332	44.2063	59.5917	36.2845	31.9768
BnaA02g09700D	GSBRNA2G00041426001	chrA02:4877375-4878353	771	20.6248	27.4377	17.8653	19.1267	13.5486	10.7597	13.353	24.1189	15.7802	15.4443	7.97901
BnaA02g09800D	GSBRNA2G00041437001	chrA02:4908408-4910182	1091	0.516516	29.4664	30.0536	25.7923	35.4413	42.9621	28.647	35.2252	35.6093	17.403	47.7898
BnaA02g09840D	GSBRNA2G00041442001	chrA02:4933995-4936840	1883	6.16439	6.29712	5.68695	6.08888	5.20336	4.52431	4.83331	5.92011	6.83817	4.52129	2.04023
BnaA02g09870D	GSBRNA2G00041446001	chrA02:4950702-4954201	1800	0.836376	19.9387	19.2281	18.122	25.5054	29.4128	18.8958	20.7466	22.2893	12.5596	33.6226
BnaA02g10360D	GSBRNA2G00092525001	chrA02:5301232-5301844	520	2.98178	34.5711	37.9577	24.3254	95.646	93.5655	43.7372	31.2492	31.9034	27.8391	74.0562
BnaA02g10760D	GSBRNA2G00036872001	chrA02:5562701-5566906	2297	15.1042	14.2587	13.669	16.5856	21.6708	22.6825	15.6174	15.1683	15.8855	24.8299	31.3081
BnaA02g10950D	GSBRNA2G00036893001	chrA02:5686964-5692238	1551	20.5877	35.8488	41.9257	41.2564	98.5006	55.0538	37.9503	32.1748	22.3101	31.5603	39.615
BnaA02g10970D	GSBRNA2G00036896001	chrA02:5700438-5703012	2101	62.9995	108.329	34.7457	63.7311	155.328	175.146	30.9103	21.2594	47.4045	55.6262	158.117
BnaA02g11430D	GSBRNA2G00090867001	chrA02:5995398-5998478	2286	0.936257	2.27395	4.79868	3.33213	5.64579	0.703545	1.50567	1.74674	4.11089	2.14401	2.72462
BnaA02g11540D	GSBRNA2G00090878001	chrA02:6032987-6036542	1245	0.377474	13.9947	16.505	12.7063	12.4326	18.2214	11.8925	15.6516	17.6537	7.97977	23.3012
BnaA02g11790D	GSBRNA2G00090908001	chrA02:6182711-6184239	1250	0.904171	17.2751	19.8237	15.825	18.6296	21.4297	15.4116	20.1766	21.1768	10.0003	20.1952
BnaA02g11890D	GSBRNA2G00090922001	chrA02:6239808-6242795	1965	22.0238	17.0559	20.4912	19.7596	31.2966	21.0892	18.2899	19.7574	18.4084	32.8535	44.0388
BnaA02g12120D	GSBRNA2G00090949001	chrA02:6356217-6358927	1356	111.676	104.643	110.734	112.079	177.721	160.369	89.027	92.8912	109.255	141.857	213.082
BnaA02g12210D	GSBRNA2G00090968001	chrA02:6460610-6461415	453	19.1838	20.2892	14.7482	15.2385	12.5713	11.091	17.9034	11.4933	12.6564	21.7528	3.71342
BnaA02g12290D	GSBRNA2G00090978001	chrA02:6496830-6497499	639	520.149	500.34	395.419	255.831	176.33	201.197	256.078	408.831	328.104	182.467	19.8407
BnaA02g12330D	GSBRNA2G00090984001	chrA02:6525026-6526217	915	647.228	734.916	548.383	504.218	387.102	401.113	584.536	741.153	565.952	412.672	234.164
BnaA02g12880D	GSBRNA2G00070124001	chrA02:6980981-7003368	15286	3.41999	3.45112	4.24323	3.99186	1.60874	2.63722	2.54675	2.29208	3.49325	2.19173	1.09499
BnaA02g13050D	GSBRNA2G00070150001	chrA02:7109253-7114694	3348	4.51361	5.64893	5.03023	4.89972	3.46895	4.08667	5.35875	4.64918	5.34056	4.41036	2.01349
BnaA02g13100D	GSBRNA2G00070155001	chrA02:7171516-7172567	973	8.92555	9.27135	9.06462	12.4337	15.5443	11.1974	13.1199	10.6725	8.97383	15.7316	20.831
BnaA02g13340D	GSBRNA2G00070188001	chrA02:7333457-7335568	1583	1.75834	1.17364	1.26001	2.8262	1.66321	0.444681	1.978	0.440707	1.81564	1.50789	5.2501
BnaA02g13590D	GSBRNA2G00070219001	chrA02:7458165-7459260	1095	0.812882	36.1861	36.5006	31.8316	52.6844	49.4395	30.1815	37.3869	42.5258	23.5589	64.8032
BnaA02g13820D	GSBRNA2G00081054001	chrA02:7602844-7605611	1837	2.74342	4.09009	4.08564	6.1024	9.7378	10.8265	3.68239	5.08966	7.11322	9.09857	9.42743
BnaA02g13920D	GSBRNA2G00081038001	chrA02:7743697-7745625	1715	17.0562	19.2969	17.5516	13.9168	9.93638	9.50848	20.6642	18.377	16.9464	9.08555	7.15373
BnaA02g14330D	GSBRNA2G00079491001	chrA02:8088021-8089554	528	16.3921	19.8994	21.0922	20.235	7.81533	13.1417	9.49556	12.6178	14.2883	14.0922	2.92992
BnaA02g14340D	GSBRNA2G00079492001	chrA02:8089628-8091374	1378	341.414	356.181	362.959	285.495	167.606	224.806	212.188	319.141	246.408	234.641	50.0527
BnaA02g14850D	GSBRNA2G00116581001	chrA02:8511296-8515384	1026	136.649	140.062	130.706	106.506	97.7378	129.722	122.176	157.689	129.748	125.496	57.4511
BnaA02g14990D	GSBRNA2G00116561001	chrA02:8623348-8626071	1390	245.42	220.774	205.279	187.3	131.724	168.068	184.74	229.552	209.199	162.735	43.4667
BnaA02g15980D	GSBRNA2G00116415001	chrA02:9432988-9433684	696	31.5615	22.5588	14.6836	14.5236	7.57003	11.2157	13.7206	19.2938	15.4242	10.0561	0.915537
BnaA02g16050D	GSBRNA2G00093932001	chrA02:9515654-9519320	1374	1.18396	1.38681	1.01069	0.90173	3.12591	3.00124	1.7292	1.26105	0.572469	3.39328	5.38031
BnaA02g16460D	GSBRNA2G00023444001	chrA02:9798811-9799775	863	23.3268	55.6297	59.8326	105.551	160.532	195.849	49.9948	94.3239	112.89	137.598	139.724
BnaA02g16580D	GSBRNA2G00088013001	chrA02:9887384-9888673	789	7.92253	9.04524	7.30871	10.8414	17.1691	22.2345	9.50179	9.64638	10.428	15.9987	27.1804
BnaA02g16670D	GSBRNA2G00088001001	chrA02:9958064-9959863	1142	0.970182	21.2492	25.4305	14.4094	51.1862	65.482	24.4752	26.3272	20.7954	18.3256	40.7859
BnaA02g17260D	GSBRNA2G00067173001	chrA02:10359769-10361978	1320	38.8599	25.0207	31.1988	25.6782	30.6136	14.3889	20.9007	25.4422	16.4477	19.1069	8.40157
BnaA02g17850D	GSBRNA2G00082962001	chrA02:10791532-10794166	1626	17.3118	17.3833	16.4319	14.0588	10.2552	12.6605	16.5799	18.0673	15.8973	13.2506	7.58663
BnaA02g18080D	GSBRNA2G00083097001	chrA02:10934335-10934896	561	27.5271	22.907	29.1705	28.3318	35.6931	24.8693	27.2092	38.0275	19.7586	25.9691	11.3042
BnaA02g18200D	GSBRNA2G00065726001	chrA02:11023887-11026724	1799	14.3472	17.6378	14.9324	15.0081	15.2779	13.2351	14.3173	11.4477	12.8288	7.55037	2.24384
BnaA02g18370D	GSBRNA2G00065747001	chrA02:11134566-11137519	1684	8.59846	5.19182	5.94997	7.85687	21.1762	11.4318	4.90333	5.56305	7.66773	11.9825	49.3016
BnaA02g18470D	GSBRNA2G00065759001	chrA02:11189274-11204069	1623	1.52991	1.49471	1.36511	1.76011	2.02236	1.93702	1.27739	1.09857	1.38206	2.73567	3.73861
BnaA02g18700D	GSBRNA2G00036507001	chrA02:11452378-11453377	921	16.4404	13.2086	10.0671	9.08061	4.76498	6.10753	3.29495	11.0256	10.5814	4.49258	0.260643
BnaA02g18750D	GSBRNA2G00036515001	chrA02:11537700-11538705	966	13.0426	10.3032	11.0195	7.57043	3.4691	5.50552	12.528	13.668	13.4832	4.04754	4.20252
BnaA02g18840D	GSBRNA2G00036527001	chrA02:11600899-11604005	1425	20.6341	22.3833	19.1247	15.7145	12.813	16.2711	16.0056	16.4573	17.8624	11.434	3.97813
BnaA02g18920D	GSBRNA2G00036543001	chrA02:11694151-11698160	2325	8.93179	8.8419	8.23933	8.19317	6.14792	6.74395	4.33409	7.03628	6.12526	9.09799	2.51803
BnaA02g19290D	GSBRNA2G00093740001	chrA02:11990974-11992749	1305	11.2132	14.7791	14.8686	14.7292	18.3058	18.8953	15.4803	15.8185	15.7015	18.9371	25.0616
BnaA02g19320D	GSBRNA2G00093736001	chrA02:11998104-12006450	4446	3.34803	2.53864	2.71408	3.02282	1.77782	1.75538	2.89539	2.18756	2.57674	2.41898	1.52497
BnaA02g19410D	GSBRNA2G00010242001	chrA02:12043005-12044366	1281	39.3292	35.3107	43.4237	46.8051	68.9656	62.8665	48.6062	51.2982	45.6987	80.5349	93.0591
BnaA02g19500D	GSBRNA2G00010229001	chrA02:12106618-12107869	841	9.11009	7.27902	7.91883	8.00942	3.9635	5.94241	7.27293	7.9352	7.78071	6.08653	3.04328
BnaA02g19700D	GSBRNA2G00064235001	chrA02:12224689-12226555	1866	7.5075	8.59476	10.2666	8.74091	11.7683	12.5452	8.72735	10.5866	8.70231	10.1865	15.6384
BnaA02g19720D	GSBRNA2G00064232001	chrA02:12233967-12236163	1680	0.648398	0.958787	0.689675	0.778928	1.32631	0.985234	1.25476	0.8061	1.42518	1.77702	6.21307
BnaA02g19850D	GSBRNA2G00064219001	chrA02:12285206-12287123	1661	38.3942	48.3765	67.2758	56.8922	65.3312	76.2565	60.5898	59.7311	62.0582	68.084	75.5266
BnaA02g19860D	GSBRNA2G00064218001	chrA02:12287285-12287904	538	39.8788	43.7008	58.3746	45.943	71.5167	84.3721	49.2468	57.1757	52.5648	65.4381	92.9814
BnaA02g20090D	GSBRNA2G00064185001	chrA02:12401411-12403698	1495	0.28174	7.40846	11.0095	6.93989	14.1413	20.9817	8.80204	10.4372	12.4268	7.92697	18.5623
BnaA02g20230D	GSBRNA2G00017871001	chrA02:12501415-12504614	1271	19.6462	19.2549	20.314	17.0666	26.3605	25.7527	22.6002	18.9991	20.1231	23.3755	39.042
BnaA02g20700D	GSBRNA2G00104319001	chrA02:13047934-13050542	1487	8.99772	10.9064	9.73916	10.0253	21.0541	31.0338	7.70381	6.98644	15.158	21.312	42.5971
BnaA02g20850D	GSBRNA2G00104341001	chrA02:13170645-13171343	582	27.0048	21.3816	16.4898	15.6253	3.83609	5.60849	10.9318	21.7664	15.0922	7.00949	2.22314
BnaA02g20890D	GSBRNA2G00104347001	chrA02:13225086-13227930	1617	7.1088	7.04858	8.2967	5.89429	2.85989	5.86236	6.39845	5.28363	7.41801	3.56247	2.46563
BnaA02g21750D	GSBRNA2G00029347001	chrA02:14145770-14148687	1327	3.0801	4.99177	4.99881	5.55428	6.05134	1.61503	4.12182	2.70897	7.40178	3.77486	13.435
BnaA02g21780D	GSBRNA2G00029338001	chrA02:14178220-14183438	2802	1.51519	1.50789	1.17102	1.18405	0.209941	0.340567	1.14878	1.35891	1.52942	0.358696	0.18947
BnaA02g22470D	GSBRNA2G00084824001	chrA02:15006338-15008337	995	32.8934	21.0109	18.4489	20.4359	9.67386	22.7293	26.6786	22.181	21.2816	22.298	6.82312
BnaA02g22810D	GSBRNA2G00084872001	chrA02:15331109-15333129	1373	90.8875	78.8208	74.0887	62.1939	58.664	59.4833	64.2734	72.2556	69.6639	54.9651	34.0199
BnaA02g23290D	GSBRNA2G00114020001	chrA02:16380809-16381835	1026	7.98495	7.3985	7.20059	5.66397	4.03662	5.52721	8.49294	7.70148	6.62662	3.65777	2.09503
BnaA02g23460D	GSBRNA2G00072498001	chrA02:16676771-16681351	3447	2.44276	1.8412	1.6276	1.18541	0.537752	0.64585	1.21522	1.36308	1.20484	0.671408	0.331131
BnaA02g23670D	GSBRNA2G00035184001	chrA02:16941237-16944515	2483	5.92459	3.18479	2.64615	4.32156	1.89118	0.959546	1.23134	2.20981	3.13426	2.88927	1.42267
BnaA02g23870D	GSBRNA2G00035145001	chrA02:17162682-17167100	1365	33.7888	55.0239	30.1084	31.8317	40.9818	47.9904	27.9873	24.7361	32.7186	39.7084	10.7501
BnaA02g24930D	GSBRNA2G00063445001	chrA02:18286888-18289693	1965	0.564287	0.775092	0.736024	0.71479	0.997887	1.67904	0.968273	0.818527	0.946114	1.08663	1.90743
BnaA02g24990D	GSBRNA2G00041694001	chrA02:18355947-18359444	1954	3.76645	2.98834	4.51772	4.84515	3.20779	3.93689	4.10611	3.90634	4.82026	4.77217	8.5343
BnaA02g25170D	GSBRNA2G00041668001	chrA02:18515873-18532420	2904	2.3524	2.21472	2.2778	2.44077	0.976153	1.48972	2.43094	1.73044	2.22211	1.35023	0.468736
BnaA02g25180D	GSBRNA2G00041667001	chrA02:18534376-18541215	2957	5.1757	5.29288	5.68115	5.94669	3.33459	2.81767	5.77302	5.85294	5.59831	3.27469	1.15935
BnaA02g25390D	GSBRNA2G00041638001	chrA02:18677327-18679445	1107	4.62512	3.95596	4.98082	5.59515	5.92009	3.39255	5.45729	4.88661	5.19018	5.90432	9.74463
BnaA02g25520D	GSBRNA2G00041623001	chrA02:18743698-18745201	1185	14.5979	12.7766	12.5364	12.894	7.05977	6.46042	9.34225	13.9603	10.991	8.56954	0.866533
BnaA02g25530D	GSBRNA2G00041622001	chrA02:18745450-18747973	1541	3.12671	6.1168	6.96024	5.66985	5.20127	7.22776	5.72918	7.24441	7.84881	4.04317	6.19551
BnaA02g26300D	GSBRNA2G00030855001	chrA02:19402479-19406384	1157	1.09075	5.12866	5.51063	12.4205	41.2492	72.9778	5.8687	14.7446	24.1157	48.8941	83.1591
BnaA02g26420D	GSBRNA2G00030840001	chrA02:19470507-19473244	1392	0.949502	1.5522	1.52917	1.50094	2.86435	2.62298	1.15851	1.04588	2.33605	2.76582	4.78278
BnaA02g26540D	GSBRNA2G00030817001	chrA02:19586983-19589684	1579	1.04497	50.8897	52.1366	44.9171	79.4019	90.9461	51.7497	53.8063	59.3276	48.1505	110.996
BnaA02g26590D	GSBRNA2G00030811001	chrA02:19633840-19635233	680	0.671326	1.10668	1.59707	2.00055	1.85338	0.617123	1.89306	0.332602	1.69513	1.41683	9.87135
BnaA02g26600D	GSBRNA2G00030810001	chrA02:19635748-19639697	2053	5.4309	8.30389	9.44156	8.1419	12.6779	15.3987	9.40687	9.8203	8.9799	10.2014	15.5765
BnaA02g26680D	GSBRNA2G00030800001	chrA02:19687755-19690278	1310	82.5113	63.5482	72.9506	73.3728	100.516	81.5836	78.0291	79.5981	71.2046	101.725	163.349
BnaA02g27010D	GSBRNA2G00069585001	chrA02:19945984-19947295	1311	4.21626	15.3162	14.2786	11.6079	19.7664	22.011	14.9984	15.0033	15.1063	12.5696	19.3953
BnaA02g27300D	GSBRNA2G00093587001	chrA02:20151749-20152831	872	23.6757	21.0364	17.8562	19.2055	18.1618	24.4122	18.3517	19.2955	19.4575	15.7178	10.8812
BnaA02g27380D	GSBRNA2G00093597001	chrA02:20184060-20186383	1347	1.4069	112.887	95.2715	102.235	141.292	142.98	89.2216	106.077	121.177	74.3347	174.095
BnaA02g27790D	GSBRNA2G00072265001	chrA02:20529416-20530169	753	1.61519	61.3235	73.6684	41.0647	124.1	166.251	58.5021	88.8662	69.8249	54.1515	121.227
BnaA02g27870D	GSBRNA2G00072278001	chrA02:20581800-20585715	1433	1.52843	3.92835	1.59825	2.56073	2.08643	3.09159	2.44346	1.18487	2.3579	4.61858	6.76301
BnaA02g27890D	GSBRNA2G00072281001	chrA02:20589788-20591472	1616	35.9889	26.3436	23.3165	22.0559	14.4187	12.1412	21.1336	19.5817	19.154	14.2329	10.1211
BnaA02g27980D	GSBRNA2G00072297001	chrA02:20675014-20677590	1375	336.314	388.741	317.421	295.422	283.345	178.473	291.702	328.037	312.386	176.737	121.782
BnaA02g27990D	GSBRNA2G00072298001	chrA02:20677824-20680307	1308	5.31221	17.7613	18.2116	15.6178	19.0345	24.204	17.9852	18.8263	20.6641	13.9356	25.226
BnaA02g28200D	GSBRNA2G00092174001	chrA02:20787777-20788559	613	50.7677	67.9316	44.5325	38.107	13.3525	14.3008	61.0705	64.1882	48.6688	12.6084	10.3313
BnaA02g28330D	GSBRNA2G00056200001	chrA02:20862267-20866749	2306	0.583042	0.57179	0.585669	0.642122	0.938499	0.394666	0.881428	0.427049	0.518733	1.17793	2.24888
BnaA02g28700D	GSBRNA2G00056151001	chrA02:21085844-21087849	977	3.43128	10.4137	7.99699	13.8039	28.7542	52.6916	8.3645	12.3968	28.2307	32.811	50.5181
BnaA02g28980D	GSBRNA2G00093777001	chrA02:21247052-21248778	871	41.9	44.7906	30.9348	27.7212	14.1303	24.6086	22.911	33.5959	31.8538	19.0614	4.77136
BnaA02g29480D	GSBRNA2G00080118001	chrA02:21528724-21535473	2581	12.7921	14.1426	12.5439	9.60649	7.28392	11.2845	12.2432	12.572	10.5865	9.76619	5.12878
BnaA02g29490D	GSBRNA2G00080116001	chrA02:21541175-21542959	1375	6.16526	5.88346	8.57998	7.56215	7.82966	10.3441	7.51718	5.8001	7.04365	9.55599	11.6674
BnaA02g29650D	GSBRNA2G00080092001	chrA02:21608647-21612852	2617	0.156077	15.5738	18.7341	14.6883	20.5436	23.7741	15.5194	15.9155	17.3697	12.0916	26.1695
BnaA02g29730D	GSBRNA2G00080081001	chrA02:21650014-21651737	743	15.1377	15.716	16.5205	16.8469	24.2034	24.5483	17.1665	18.9135	20.0781	27.1413	32.9476
BnaA02g29970D	GSBRNA2G00080049001	chrA02:21759296-21761579	2067	9.6774	9.9958	8.68931	7.23687	5.73057	5.97902	8.92757	10.5641	7.05878	4.44359	3.33124
BnaA02g30100D	GSBRNA2G00091655001	chrA02:21851127-21853921	2311	5.82402	11.0828	6.92987	10.3209	13.4392	14.413	7.26951	7.45152	11.6843	12.9105	4.73103
BnaA02g30190D	GSBRNA2G00091664001	chrA02:21887426-21888571	1041	8.46615	6.11087	7.58236	6.97755	3.89298	4.60698	6.80609	7.52822	7.05071	3.87389	2.61692
BnaA02g30200D	GSBRNA2G00091666001	chrA02:21890649-21891643	757	441.053	386.263	383.471	366.815	250	294.701	382.741	417.519	361.711	265.766	191.84
BnaA02g30470D	GSBRNA2G00055454001	chrA02:22042463-22045797	2484	73.2767	80.2176	71.0379	60.7922	41.0887	43.3038	51.7057	68.5817	56.9919	32.835	11.1096
BnaA02g30490D	GSBRNA2G00055451001	chrA02:22050522-22054346	1478	43.488	35.06	47.3507	40.8965	30.2472	41.5962	49.4206	43.8629	34.0595	44.5777	13.0628
BnaA02g30620D	GSBRNA2G00055435001	chrA02:22119789-22122345	1975	4.86519	240.763	266.685	225.782	334.591	399.12	222.897	243.655	264.035	197.422	482.41
BnaA02g30680D	GSBRNA2G00055427001	chrA02:22152891-22153781	890	2.48356	1.05773	2.26146	3.18618	2.9128	3.05803	3.85359	3.79332	3.91578	3.58611	9.14814
BnaA02g30740D	GSBRNA2G00055421001	chrA02:22180980-22185890	2799	8.70941	4.34858	5.56143	6.72804	2.24274	3.28961	8.74123	5.35432	6.44448	5.60311	3.53638
BnaA02g31020D	GSBRNA2G00055386001	chrA02:22407993-22410773	2526	0.265945	14.2411	16.4873	12.1218	18.8589	23.5972	14.1664	15.4954	16.0344	11.0649	25.9899
BnaA02g31040D	GSBRNA2G00055383001	chrA02:22421657-22423983	1183	486.288	493.768	458.795	443.544	348.43	430.304	354.291	478.297	394.466	325.121	69.1804
BnaA02g31380D	GSBRNA2G00120498001	chrA02:22631742-22635218	2301	3.30166	3.41274	1.98524	3.11322	2.13019	2.96106	1.54958	2.81538	4.07544	2.8369	1.13213
BnaA02g31570D	GSBRNA2G00120475001	chrA02:22775154-22778880	546	29.8108	21.4224	19.9042	22.0363	14.507	17.3095	28.1722	23.515	23.6931	19.3359	10.2821
BnaA02g31900D	GSBRNA2G00120429001	chrA02:23001727-23004056	1361	20.2169	28.7241	22.0636	31.9279	59.2051	30.2941	37.4926	29.0378	27.7375	44.5262	89.5762
BnaA02g31930D	GSBRNA2G00120425001	chrA02:23012533-23014309	1389	2.39893	8.25885	10.9772	8.46164	9.54051	12.8506	8.88714	11.548	11.7603	7.42365	12.8695
BnaA02g32440D	GSBRNA2G00120355001	chrA02:23327036-23328873	1132	281.578	224.949	242.755	195.95	150.454	168.571	201.332	235.725	170.552	238.181	62.2696
BnaA02g32550D	GSBRNA2G00120342001	chrA02:23411189-23413376	1607	17.4565	16.7722	15.0347	14.7916	14.8142	17.899	12.2219	15.1927	15.7995	12.7465	7.58599
BnaA02g33090D	GSBRNA2G00046018001	chrA02:23689594-23693777	3000	3.07629	3.94931	4.18588	4.19501	3.66816	5.61009	4.05946	3.28505	3.79936	4.93747	5.73365
BnaA02g33450D	GSBRNA2G00046070001	chrA02:23992559-23994350	1396	0.235421	0.862302	0.891302	2.86569	4.21426	8.98447	1.29849	2.48157	6.24226	4.93216	7.09564
BnaA02g33520D	GSBRNA2G00046078001	chrA02:24041126-24044914	2594	3.96441	4.10351	4.55132	5.21852	3.58436	3.04605	10.7398	5.86965	7.52893	7.23535	10.4333
BnaA02g33770D	GSBRNA2G00047557001	chrA02:24201545-24204724	1501	31.0313	28.0088	28.8752	30.0751	22.0154	17.7293	25.7146	31.4737	27.5706	22.881	12.4174
BnaA02g33920D	GSBRNA2G00047540001	chrA02:24261439-24266918	2359	4.69011	3.76587	5.39227	6.89549	3.996	3.5517	8.14323	5.37559	4.51086	5.11045	1.65677
BnaA02g33970D	GSBRNA2G00047532001	chrA02:24305578-24308949	2268	6.60369	6.57813	6.51821	6.3686	5.4962	5.55184	4.4504	6.08794	4.8165	7.78936	2.96765
BnaA02g34090D	GSBRNA2G00047514001	chrA02:24375655-24377349	1321	25.0925	23.5571	27.6469	28.5108	46.9162	66.5827	24.3478	31.2062	35.8325	55.701	61.9856
BnaA02g34110D	GSBRNA2G00047511001	chrA02:24386798-24389121	1417	5.21304	5.76868	4.73469	5.05434	3.9546	2.99272	4.71751	4.59609	4.79615	3.73803	1.60675
BnaA02g34120D	GSBRNA2G00047508001	chrA02:24398484-24399399	915	7.71885	8.94071	6.86247	9.49204	13.7961	23.5794	6.10367	7.73732	15.8066	21.0054	23.0064
BnaA02g34140D	GSBRNA2G00047504001	chrA02:24419465-24419985	520	14.5244	29.7198	32.6354	45.192	84.1831	84.2725	20.3141	30.2988	43.6027	77.4648	46.4825
BnaA02g34200D	GSBRNA2G00047495001	chrA02:24432153-24436423	2367	0.793517	1.79757	1.0991	1.44143	1.41368	1.3054	1.17516	0.732556	1.10242	1.69567	2.36684
BnaA02g34220D	GSBRNA2G00047492001	chrA02:24440828-24441668	840	9.67521	8.31599	7.45956	8.73566	9.04479	13.5419	10.5029	8.68864	8.84487	13.7984	20.0759
BnaA02g34510D	GSBRNA2G00047455001	chrA02:24582144-24586321	941	9.31518	8.96411	7.62047	8.21331	0.78573	0.828941	6.21782	7.25383	8.53983	0.638953	0.794304
BnaA02g34850D	GSBRNA2G00016402001	chrA02:24771146-24772305	571	14.0347	11.9384	10.8442	9.94301	5.68663	5.96583	7.76132	12.3351	9.78835	6.07022	1.53374
BnaA02g35050D	GSBRNA2G00023122001	chrA02_random:44701-46066	1239	5.5031	7.77264	5.35049	6.80794	6.92512	7.53469	8.27546	6.78004	7.53488	7.56404	13.9901
BnaA02g35410D	GSBRNA2G00043969001	chrA02_random:252434-255509	2262	5.31868	65.6467	68.0636	57.6803	80.5163	92.0361	65.549	74.0564	76.0576	48.8922	102.756
BnaA02g35530D	GSBRNA2G00023513001	chrA02_random:311839-313754	935	6.75188	5.77064	6.45293	7.09968	12.5774	4.08778	1.09189	0.861664	2.67896	3.51029	1.38642
BnaA02g35710D	GSBRNA2G00017801001	chrA02_random:482357-484245	1192	0.43212	2.04241	1.2199	3.14792	3.96393	4.13804	1.18696	2.02058	4.57321	4.2843	2.92083
BnaA02g35780D	GSBRNA2G00048272001	chrA02_random:527962-529848	1532	23.5494	26.7644	27.1938	28.0761	19.5106	28.5438	27.5774	26.876	21.1854	27.9488	8.25147
BnaA02g35880D	GSBRNA2G00042766001	chrA02_random:590037-593386	1953	9.35238	34.9906	36.0274	34.4554	38.7098	42.4666	32.3333	37.3456	40.8363	25.4505	47.3302
BnaA02g36030D	GSBRNA2G00066084001	chrA02_random:666513-667522	869	34.3177	60.4603	33.5927	68.2701	173.465	99.0562	27.4298	44.0317	90.7722	89.4525	148.927
BnaA02g36490D	GSBRNA2G00012061001	chrA02_random:980513-983735	1735	26.6925	23.2243	29.0535	27.6297	35.7653	51.0819	24.4499	22.8126	31.3446	45.8443	58.5557
BnaA02g36500D	GSBRNA2G00016770001	chrA02_random:984507-985252	745	16.0404	11.9494	11.6242	10.3562	25.04	23.1277	11.9162	12.1771	12.7399	20.9628	32.6544
BnaA02g36510D	GSBRNA2G00016772001	chrA02_random:996219-997101	789	3.44923	241.912	238.732	231.971	275.862	299.591	201.901	256.323	280.709	144.18	361.173
BnaA02g36580D	GSBRNA2G00026206001	chrA02_random:1101950-1103789	563	19.5458	21.1509	18.0624	14.7509	10.7374	15.3553	19.4666	15.4858	16.5597	15.6525	5.08454
BnaA02g36790D	GSBRNA2G00027405001	chrA02_random:1406633-1415275	1959	6.77314	7.55739	6.29849	5.99957	3.67997	7.03696	4.97611	5.1762	6.39971	4.38337	3.10546
BnaA02g37020D	GSBRNA2G00027985001	chrA02_random:1541701-1547395	1692	20.301	24.3817	15.9867	14.9916	7.58404	10.5905	12.6114	17.5003	16.5526	9.89436	1.7449
BnaA02g37060D	GSBRNA2G00027991001	chrA02_random:1578177-1580772	890	9.12471	10.1485	7.3025	6.81365	3.29755	4.03302	6.28779	7.21025	6.61324	3.69392	1.52104
BnaA03g00090D	GSBRNA2G00049185001	chrA03:23788-25769	1578	18.2362	14.0234	16.9168	21.513	17.4464	13.4297	26.0194	18.8636	19.3792	20.0698	7.70682
BnaA03g00190D	GSBRNA2G00049200001	chrA03:78230-79886	1629	28.098	35.4598	34.983	39.2405	62.2449	86.2008	36.6312	39.8447	46.7255	63.321	87.3545
BnaA03g00260D	GSBRNA2G00049208001	chrA03:103118-104803	1048	339.982	313.302	225.317	257.537	224.609	186.684	291.091	274.654	273.706	144.733	97.356
BnaA03g00400D	GSBRNA2G00049222001	chrA03:142921-144786	1382	9.78855	7.10809	9.44361	12.5245	9.15076	6.38296	15.2927	13.0848	10.0716	11.9119	4.03431
BnaA03g00640D	GSBRNA2G00049249001	chrA03:291350-293518	1241	33.9059	26.0294	27.7534	21.5847	17.7861	15.8901	22.3037	27.4521	21.7175	26.8714	13.5498
BnaA03g00770D	GSBRNA2G00049263001	chrA03:331527-334109	1512	4.72819	3.42571	4.04909	4.12837	3.54608	5.70089	3.90047	3.01123	3.00771	4.74201	1.47062
BnaA03g00800D	GSBRNA2G00049267001	chrA03:345043-345860	817	28.0809	21.4708	21.5762	16.8332	7.82356	7.13898	19.843	21.0794	16.7199	12.3059	6.50083
BnaA03g00870D	GSBRNA2G00049277001	chrA03:378519-380641	1494	14.0259	17.7508	10.6069	10.2806	3.92377	2.80674	4.84999	10.3765	11.4633	2.96732	2.51941
BnaA03g01040D	GSBRNA2G00049299001	chrA03:452883-457717	2270	5.66391	9.83962	10.8806	10.8717	22.9634	21.8638	15.7413	11.5718	13.2501	13.7844	25.3697
BnaA03g01070D	GSBRNA2G00049303001	chrA03:472765-475042	1104	107.619	74.3963	73.5785	37.8062	12.0227	20.4524	23.7283	64.9391	70.0003	8.98513	2.15466
BnaA03g01150D	GSBRNA2G00049312001	chrA03:549617-552620	2280	2.86361	8.03495	9.58079	7.64859	13.4736	14.7508	8.27939	8.24183	8.63482	7.94932	14.746
BnaA03g01440D	GSBRNA2G00049349001	chrA03:657604-660444	1587	29.3011	23.8245	33.0914	28.7988	17.4996	17.2219	38.2299	35.6353	25.3806	35.8945	12.3464
BnaA03g01480D	GSBRNA2G00049355001	chrA03:669654-671078	969	44.2687	44.3774	39.4685	47.2348	61.2817	51.2061	45.4898	44.0081	44.428	66.4362	84.0897
BnaA03g01590D	GSBRNA2G00049367001	chrA03:715331-718618	1782	2.67078	1.95794	3.10925	3.48314	4.74983	2.81218	5.88183	4.35684	5.40429	6.42407	5.49522
BnaA03g02030D	GSBRNA2G00129640001	chrA03:939751-941250	1033	2.20051	133.748	103.342	98.1554	221.993	264.86	121.218	142.888	141.511	123.713	281.697
BnaA03g02250D	GSBRNA2G00129668001	chrA03:1041052-1042636	1584	6.17227	4.02501	3.59548	5.10774	4.62915	4.1283	2.17668	3.01893	4.45404	2.49137	2.18298
BnaA03g02500D	GSBRNA2G00129695001	chrA03:1129248-1130013	765	26.9334	13.1163	12.6477	13.2623	2.87043	2.22808	8.50242	11.6964	14.8941	5.11023	0.923546
BnaA03g02780D	GSBRNA2G00129735001	chrA03:1339885-1341603	1341	0.0547873	1.15458	1.08459	1.1478	1.53713	2.11429	1.02244	1.08361	1.11043	0.503887	1.36058
BnaA03g02990D	GSBRNA2G00129763001	chrA03:1446502-1449852	1478	3.09177	5.31767	4.11871	3.36174	2.96789	6.54425	2.78956	2.06275	3.06954	3.4355	0.47339
BnaA03g03110D	GSBRNA2G00129777001	chrA03:1499678-1500876	1198	11.9153	12.3416	12.4826	15.628	22.7594	27.4398	12.6554	17.4215	21.4627	22.1035	27.125
BnaA03g03200D	GSBRNA2G00129790001	chrA03:1551217-1551930	713	10.4957	10.8062	12.0321	11.9522	8.85152	7.25809	12.9701	9.95254	16.494	12.6969	20.773
BnaA03g03340D	GSBRNA2G00129808001	chrA03:1609457-1610514	782	0.815098	20.3712	25.7914	15.8359	17.4586	23.4145	15.5981	26.957	26.3051	9.49951	23.3967
BnaA03g03680D	GSBRNA2G00129844001	chrA03:1742587-1743010	423	17.7328	40.3593	37.6526	40.632	39.9844	36.9671	36.8411	51.7787	35.7512	23.0083	48.638
BnaA03g04010D	GSBRNA2G00129886001	chrA03:1870927-1873042	1662	2.63375	2.11659	1.58522	2.45077	0.94048	0.74085	1.31066	1.96145	2.79342	0.721513	0.72516
BnaA03g04390D	GSBRNA2G00129929001	chrA03:2049789-2054408	2478	4.20275	3.50527	4.51031	3.98155	2.25521	3.1994	4.11864	2.91181	3.92174	3.54358	1.79378
BnaA03g04530D	GSBRNA2G00129945001	chrA03:2121011-2123366	1553	0.623513	0.688737	1.08794	0.94318	1.57888	0.454564	1.16412	0.954063	1.40171	0.989644	2.85287
BnaA03g04590D	GSBRNA2G00129952001	chrA03:2138890-2140466	1309	10.2452	14.9663	16.1707	16.2695	37.881	13.1026	6.85512	5.79081	8.14832	10.3768	20.0583
BnaA03g04640D	GSBRNA2G00129957001	chrA03:2161676-2163022	1118	86.2201	72.0053	85.9737	92.8139	117.079	119.923	80.8012	90.6959	84.0756	138.115	173.303
BnaA03g05110D	GSBRNA2G00130011001	chrA03:2338479-2342654	1630	3.06786	2.85291	2.86366	4.03842	3.10814	2.57415	5.46567	2.48922	6.1543	3.23404	8.94187
BnaA03g05130D	GSBRNA2G00130014001	chrA03:2349207-2351577	1848	1.91635	2.51902	2.78075	4.78959	4.68354	4.74653	3.75373	3.48126	6.59731	5.19684	6.58601
BnaA03g05190D	GSBRNA2G00130020001	chrA03:2389310-2391491	1749	0.702202	12.8863	26.1493	10.0206	32.7439	56.0131	15.2128	18.3211	17.0152	7.96025	24.0267
BnaA03g05250D	GSBRNA2G00130027001	chrA03:2421017-2422758	1103	1.00093	9.69022	23.8449	6.4251	30.9334	53.3949	11.213	11.1968	8.60675	7.0977	19.0954
BnaA03g05430D	GSBRNA2G00130048001	chrA03:2480623-2483968	2361	0.934546	3.18022	4.60103	3.38022	4.01988	5.1107	3.50261	3.92633	4.90845	2.47916	7.05587
BnaA03g05790D	GSBRNA2G00130091001	chrA03:2633749-2637372	2315	3.32583	2.79749	3.18315	3.44508	1.78693	1.83075	2.76994	2.46161	2.77132	1.96521	1.02681
BnaA03g05840D	GSBRNA2G00130097001	chrA03:2657796-2659266	799	60.4017	57.8565	54.0135	63.3866	56.3213	41.2173	48.2018	54.0197	57.3389	37.3059	21.5649
BnaA03g05860D	GSBRNA2G00130099001	chrA03:2666224-2667788	1212	3.68818	5.78199	3.90512	3.66111	3.56466	2.87378	3.34028	2.81464	3.86426	3.41938	0.550519
BnaA03g05930D	GSBRNA2G00130106001	chrA03:2705070-2706879	1488	27.8917	30.5461	28.3231	34.0463	45.2147	57.2522	28.2884	29.6191	39.9099	41.5174	64.5905
BnaA03g06030D	GSBRNA2G00130118001	chrA03:2731311-2732334	767	13.6939	11.7252	10.8754	12.1965	6.97583	5.47905	11.2411	11.9183	11.8652	7.20683	5.39732
BnaA03g06060D	GSBRNA2G00130121001	chrA03:2736491-2738683	1857	0.221164	11.2874	13.2012	10.8631	13.0682	16.4368	11.8288	13.2524	14.6068	7.77753	17.7584
BnaA03g06250D	GSBRNA2G00130141001	chrA03:2807260-2809443	1099	7.95825	7.86859	8.00651	9.14454	11.6773	12.0313	8.4579	8.54671	9.94266	11.8101	14.8231
BnaA03g06440D	GSBRNA2G00130160001	chrA03:2862001-2864677	1825	0.235766	0.457005	0.638076	0.554087	0.687536	0.717943	0.429935	0.512658	0.617036	0.547421	1.89539
BnaA03g06520D	GSBRNA2G00130171001	chrA03:2913346-2918001	1215	4.87957	3.39201	3.53921	3.41903	8.47691	11.2979	2.9931	4.07772	3.37142	10.3049	10.091
BnaA03g06610D	GSBRNA2G00130184001	chrA03:2952133-2957479	3116	4.62695	3.17535	4.39552	5.02158	3.26236	2.36714	6.83291	5.05388	4.94228	4.46421	1.81359
BnaA03g06640D	GSBRNA2G00130188001	chrA03:2966295-2968127	1419	3.73713	6.27415	3.58888	2.20204	3.5513	4.04194	4.30412	3.74309	3.54883	2.84896	0.768053
BnaA03g06680D	GSBRNA2G00130194001	chrA03:2990681-2992364	1007	48.4645	49.7159	42.9042	55.1286	98.2235	89.1048	48.9938	55.4585	58.0879	97.2329	161.699
BnaA03g07410D	GSBRNA2G00149004001	chrA03:3274613-3277353	1685	0.042202	2.03373	2.07519	1.73941	2.63432	3.93333	2.31507	1.96438	2.43793	1.83933	2.40032
BnaA03g07740D	GSBRNA2G00148964001	chrA03:3437115-3439760	1679	20.6812	58.7902	59.6019	52.0949	82.242	93.7651	55.8674	62.1841	60.8456	52.5748	93.1867
BnaA03g07830D	GSBRNA2G00148947001	chrA03:3493269-3494533	1264	5.43416	5.34414	5.27924	5.63068	10.8063	12.1119	6.12746	7.18958	6.53703	14.3077	14.9556
BnaA03g08110D	GSBRNA2G00148916001	chrA03:3651670-3655237	2481	6.60102	6.83331	5.11664	3.99943	1.5527	1.67478	5.26145	4.89698	5.21013	1.77651	1.08381
BnaA03g08320D	GSBRNA2G00148888001	chrA03:3759618-3764867	1736	6.57148	11.1087	11.499	11.599	13.9779	15.0223	11.4876	12.8795	12.4754	13.6159	19.484
BnaA03g08390D	GSBRNA2G00148879001	chrA03:3784973-3788549	1721	2.79748	2.99824	2.42195	3.00405	2.1275	0.912031	2.02255	2.11551	2.38588	1.81185	0.618674
BnaA03g08590D	GSBRNA2G00148852001	chrA03:3886166-3887669	1064	13.5827	12.7257	13.5924	14.4903	13.5461	7.96743	5.53215	7.37782	11.3544	4.87805	2.50197
BnaA03g08720D	GSBRNA2G00148835001	chrA03:3952993-3955305	1242	36.6382	37.6529	35.8117	38.4029	20.7192	28.4362	36.0532	38.5968	34.3283	26.6613	15.9812
BnaA03g08810D	GSBRNA2G00148825001	chrA03:3999756-4003901	2061	2.50335	1.81764	2.35305	3.20334	1.5411	1.20028	4.71083	2.97742	3.07056	2.83921	0.766954
BnaA03g08820D	GSBRNA2G00148824001	chrA03:4009486-4011031	900	135.142	99.3483	116.997	97.9174	82.4354	135.08	106.795	137.177	97.1514	123.125	50.2216
BnaA03g08850D	GSBRNA2G00148820001	chrA03:4014805-4015543	595	6.18734	475.955	417.316	361.337	450.737	472.574	334.233	456.093	493.071	207.528	516.986
BnaA03g08910D	GSBRNA2G00148814001	chrA03:4031324-4036605	525	2.86011	3.38197	3.05179	4.77812	3.04227	3.44148	8.05042	4.81301	5.91513	4.81679	10.4165
BnaA03g09250D	GSBRNA2G00148776001	chrA03:4154775-4155399	624	2.01883	3.01415	4.23442	6.53931	7.73123	5.16098	4.04828	5.84901	7.18556	6.54301	7.44034
BnaA03g09530D	GSBRNA2G00148744001	chrA03:4270443-4271227	634	16.6212	18.1319	26.2964	20.7868	65.8367	18.0502	51.4748	74.1568	14.2828	54.9107	69.3364
BnaA03g09580D	GSBRNA2G00148739001	chrA03:4286804-4287290	486	0.2117	6.73654	6.59505	7.09406	8.22534	11.8009	9.24527	8.94378	9.20654	6.10284	13.1351
BnaA03g09600D	GSBRNA2G00148736001	chrA03:4290059-4293190	1109	31.7102	24.462	23.5401	25.0556	18.3222	28.1774	24.1807	24.5069	23.0299	23.0392	11.6302
BnaA03g09610D	GSBRNA2G00148735001	chrA03:4295242-4296212	660	11.2627	12.7338	13.819	11.694	13.4537	17.4038	11.5771	18.6269	10.5626	21.8733	1.90837
BnaA03g10230D	GSBRNA2G00148663001	chrA03:4605418-4606865	954	55.3671	35.5564	45.2388	44.398	38.461	53.6435	56.5414	53.5785	40.8736	51.6737	11.8528
BnaA03g10420D	GSBRNA2G00148642001	chrA03:4688135-4690485	1778	2.14684	4.87783	4.53775	8.41505	13.8973	22.7913	5.35312	7.26327	13.3405	15.9247	16.5323
BnaA03g10550D	GSBRNA2G00148629001	chrA03:4749176-4751359	1078	5.74	1.87973	0.827249	2.06753	0.171992	0.150709	2.98262	1.01969	0.284286	2.14298	0.421843
BnaA03g10620D	GSBRNA2G00148620001	chrA03:4795742-4799004	1591	4.10141	45.302	45.8483	37.5249	49.8826	61.4904	38.1346	48.2317	49.6921	30.4069	68.4519
BnaA03g10920D	GSBRNA2G00062627001	chrA03:4899927-4906150	2503	1.41719	4.27667	4.39711	3.87877	4.30169	4.60709	4.36038	4.36854	3.60737	2.39094	4.00612
BnaA03g11060D	GSBRNA2G00062612001	chrA03:4969164-4972492	1909	0.41377	6.80678	5.90652	6.36341	11.2199	10.6131	6.00941	6.28031	8.09862	4.18506	8.69275
BnaA03g11370D	GSBRNA2G00062572001	chrA03:5111149-5113312	1770	0.0399353	0.630943	1.06175	1.14455	0.740673	1.54088	1.00122	0.651863	1.00128	0.430361	1.72516
BnaA03g11700D	GSBRNA2G00075848001	chrA03:5260774-5264151	1836	3.95123	18.706	20.3639	17.592	21.0917	26.106	19.3623	20.2759	22.8776	12.6955	27.9889
BnaA03g11770D	GSBRNA2G00075856001	chrA03:5295413-5296207	537	1060.64	941.492	970.626	743.604	594.805	888.497	774.593	927.836	823.129	769.442	223.026
BnaA03g11840D	GSBRNA2G00075864001	chrA03:5345047-5347451	2039	4.11418	5.61944	3.24807	3.92835	3.95286	6.26952	2.09273	2.18549	3.39143	3.89204	0.391127
BnaA03g12050D	GSBRNA2G00075891001	chrA03:5450009-5451562	1454	0.442578	0.59809	0.447922	0.463394	1.47464	1.01649	0.764878	0.46416	0.594659	1.29369	2.55523
BnaA03g12300D	GSBRNA2G00086683001	chrA03:5588449-5590367	1797	4.0811	4.23989	3.55945	3.83032	1.79157	3.3482	4.0332	3.73381	2.32034	2.42958	1.09213
BnaA03g12500D	GSBRNA2G00017893001	chrA03:5710156-5711198	948	4.14237	5.46674	5.99211	6.50431	11.9845	11.0864	5.87323	5.64306	7.09277	13.084	10.7869
BnaA03g12630D	GSBRNA2G00066766001	chrA03:5762414-5765818	1569	1.96632	3.41046	3.91132	3.81541	5.2963	4.28136	3.5356	3.36157	2.8959	3.5638	5.9722
BnaA03g12700D	GSBRNA2G00066758001	chrA03:5790951-5792010	1059	15.2622	9.67428	9.69412	6.47798	6.87561	6.19928	7.51824	8.92074	6.14865	10.788	5.99063
BnaA03g12810D	GSBRNA2G00066747001	chrA03:5817587-5823144	1221	5.93229	5.55404	4.62503	6.36944	4.39928	4.6447	4.75672	5.18037	5.15493	3.99949	1.78154
BnaA03g13140D	GSBRNA2G00066706001	chrA03:5966780-5967530	750	20.1405	7.74416	8.30186	14.0123	26.523	23.921	37.9022	27.4279	18.1045	35.1872	75.1961
BnaA03g13190D	GSBRNA2G00066701001	chrA03:5982083-5983746	1581	8.82745	8.43601	8.54793	7.45539	6.59079	9.0123	9.39326	8.83082	8.04291	7.72721	3.64214
BnaA03g13320D	GSBRNA2G00066686001	chrA03:6053112-6055294	1791	3.70598	5.02843	8.42546	7.26244	5.02859	8.53282	5.8635	6.35552	6.59898	5.43474	11.794
BnaA03g13410D	GSBRNA2G00142212001	chrA03:6087919-6089201	462	63.381	55.8797	54.0254	56.164	34.1998	35.2588	61.619	47.5815	49.0553	36.1651	17.8978
BnaA03g13510D	GSBRNA2G00142202001	chrA03:6151975-6153741	1299	0.358539	17.4545	22.9423	16.9446	31.4827	39.9039	24.5081	21.2067	22.5641	14.8147	37.1633
BnaA03g13530D	GSBRNA2G00142200001	chrA03:6164068-6165795	1221	59.217	113.497	50.7915	45.7425	25.4836	29.8126	35.3511	59.456	64.0923	33.167	2.34008
BnaA03g13550D	GSBRNA2G00142198001	chrA03:6183186-6185322	1122	1.90983	2.05912	3.28551	2.57773	3.87057	1.83829	2.30936	1.54629	2.61245	2.38136	4.88252
BnaA03g13580D	GSBRNA2G00142194001	chrA03:6199959-6201708	1447	5.37776	4.5923	4.16413	4.06381	3.11594	3.24281	3.23267	3.91568	3.45067	1.36735	0.824168
BnaA03g13650D	GSBRNA2G00142184001	chrA03:6248340-6249325	858	0.912567	4.46447	5.23941	12.618	16.2028	20.6018	4.18747	11.3214	17.6737	10.4114	6.15134
BnaA03g13740D	GSBRNA2G00142173001	chrA03:6307491-6309741	1071	5.64656	8.34167	5.07617	9.77791	19.9082	14.7026	5.24871	5.93716	14.0426	13.3343	10.7158
BnaA03g14030D	GSBRNA2G00142139001	chrA03:6429844-6432695	1891	76.5374	69.8398	59.0243	50.427	13.947	21.7564	43.8489	70.3582	61.2534	20.3687	3.43014
BnaA03g14480D	GSBRNA2G00142075001	chrA03:6666240-6669454	2053	0.541837	33.8084	35.2418	29.6394	45.3329	54.2695	31.8677	35.0011	38.4321	26.5181	57.7176
BnaA03g14550D	GSBRNA2G00142068001	chrA03:6689745-6691355	996	22.4931	19.8299	18.922	23.1572	12.1365	11.812	17.951	18.3148	20.8023	8.6446	7.38395
BnaA03g14580D	GSBRNA2G00142065001	chrA03:6696491-6698364	734	10.3554	9.08061	8.10798	11.66	12.5389	10.8749	12.0942	9.27528	10.619	9.40683	20.517
BnaA03g15020D	GSBRNA2G00142013001	chrA03:6925540-6926480	877	1.60804	3.06117	3.87765	4.1552	7.25659	2.59675	3.66557	1.95564	2.75023	4.19445	10.8379
BnaA03g15250D	GSBRNA2G00141986001	chrA03:7079749-7082273	1580	3.5286	3.27448	4.88438	3.33172	0.368519	0.688995	3.41027	4.00423	3.79216	1.07123	0.439531
BnaA03g15330D	GSBRNA2G00141977001	chrA03:7112072-7115439	1965	8.93329	8.99197	8.95795	9.90346	9.1745	6.11204	5.47766	7.42763	9.24827	7.32899	4.09759
BnaA03g15380D	GSBRNA2G00141972001	chrA03:7139281-7141488	1723	0.905961	1.5395	1.80067	3.08391	5.01628	8.58773	1.77634	2.96786	6.26615	4.77998	3.37251
BnaA03g15420D	GSBRNA2G00141968001	chrA03:7152518-7157108	2985	0.180728	10.9557	14.9384	10.2374	15.0548	19.5595	12.6226	12.9958	14.1334	9.34838	21.4236
BnaA03g15610D	GSBRNA2G00141946001	chrA03:7218726-7219609	676	91.2343	104.476	90.4075	121.955	98.2757	74.339	245.931	143.067	149.339	111.555	251.976
BnaA03g15750D	GSBRNA2G00141931001	chrA03:7290040-7295561	3495	0.632293	1.15317	1.0273	1.09977	3.15016	6.89947	1.10709	1.178	1.7428	3.04772	3.57019
BnaA03g15800D	GSBRNA2G00141921001	chrA03:7315112-7321657	4189	5.73298	5.45506	6.00187	6.07783	4.81674	4.65043	3.89146	4.51238	5.44983	4.15256	2.59617
BnaA03g15870D	GSBRNA2G00141914001	chrA03:7347296-7348623	785	9.92338	8.04882	8.59578	10.0201	6.84252	5.49457	5.17083	6.83039	7.15004	4.70453	2.31548
BnaA03g15930D	GSBRNA2G00141908001	chrA03:7371231-7373979	2144	2.11357	2.69422	1.53736	2.02871	1.63674	2.12429	1.74457	1.70263	2.21728	0.982213	0.562303
BnaA03g16020D	GSBRNA2G00141899001	chrA03:7407851-7409946	983	10.0616	45.3434	42.678	39.6562	49.1577	57.7803	40.0241	47.8066	54.2364	29.5656	59.7132
BnaA03g16160D	GSBRNA2G00141881001	chrA03:7494470-7496610	1247	18.7644	21.6002	20.8842	17.8064	9.66368	8.93784	15.105	21.763	16.9079	13.5737	5.96287
BnaA03g16370D	GSBRNA2G00141852001	chrA03:7643131-7645208	1341	20.85	19.5108	23.8368	24.6995	14.3376	26.2796	23.9934	19.7017	23.0731	21.4243	9.23462
BnaA03g16500D	GSBRNA2G00141837001	chrA03:7712441-7714700	1112	0.502516	30.0295	31.1036	25.1199	35.6885	47.2179	23.8405	28.5219	29.1162	17.8991	54.5492
BnaA03g16640D	GSBRNA2G00141820001	chrA03:7757616-7759993	1441	14.8951	12.6015	13.9984	12.6784	19.5269	21.0703	15.1864	15.7359	12.9077	22.9925	28.3621
BnaA03g16770D	GSBRNA2G00141803001	chrA03:7845989-7848249	2117	1.92509	2.63649	4.21734	4.12311	6.72551	1.61308	5.59833	2.18513	6.16008	4.11296	8.25872
BnaA03g16830D	GSBRNA2G00141794001	chrA03:7873583-7875074	1491	9.01963	9.08899	6.82996	7.61621	7.87468	10.3307	3.46046	6.63731	8.58849	5.82391	1.47789
BnaA03g16950D	GSBRNA2G00086074001	chrA03:7952122-7957094	3048	7.87985	7.37731	6.57934	8.18251	8.51978	11.5056	7.86408	6.11182	8.41749	8.94505	14.7747
BnaA03g16990D	GSBRNA2G00086079001	chrA03:7967904-7969561	1023	21.6288	21.7548	22.8534	25.4725	42.1887	44.2788	22.0861	30.1787	25.9355	36.8653	44.269
BnaA03g17000D	GSBRNA2G00086080001	chrA03:7971501-7973239	1040	5.30887	3.60106	2.71259	3.35273	1.52561	1.93533	4.06727	3.46357	2.89961	2.63775	1.4945
BnaA03g17020D	GSBRNA2G00086082001	chrA03:7983648-7985012	1087	17.3678	20.5157	11.3697	13.9582	23.25	18.103	10.0125	9.6381	9.24273	21.0704	35.6561
BnaA03g17030D	GSBRNA2G00086084001	chrA03:7987202-7988660	1151	9.41004	22.4029	5.58677	7.99	33.3364	21.3044	3.1491	6.19218	14.5608	23.7847	33.7272
BnaA03g17520D	GSBRNA2G00124886001	chrA03:8227706-8228312	582	24.7625	21.6401	19.4221	19.855	36.4539	32.4435	25.4251	22.0897	21.9371	33.668	66.4322
BnaA03g17820D	GSBRNA2G00124850001	chrA03:8415036-8417334	1804	1.44535	5.00436	2.69475	5.48015	3.98505	5.06312	3.48231	3.79901	9.31049	8.73469	3.50818
BnaA03g17850D	GSBRNA2G00124847001	chrA03:8424732-8426724	1347	0.256581	1.94129	2.24628	1.44717	2.11719	2.35531	2.091	2.11739	2.14673	1.4483	4.02398
BnaA03g18480D	GSBRNA2G00124774001	chrA03:8685098-8687480	1941	78.2036	92.417	79.5325	58.5923	56.8709	81.529	62.0331	78.2245	64.2073	73.0883	12.9737
BnaA03g18570D	GSBRNA2G00124764001	chrA03:8732265-8734897	2632	1.29898	1.21746	1.12803	1.10327	0.534969	0.771465	0.997233	1.14788	0.967209	0.705428	0.262363
BnaA03g18830D	GSBRNA2G00124730001	chrA03:8887636-8890608	2173	18.2753	17.1342	17.1634	14.0137	11.4139	14.2801	13.9872	17.5062	16.3518	12.3791	6.67146
BnaA03g18990D	GSBRNA2G00124709001	chrA03:8984143-8985718	1179	3.36096	2.9536	2.99312	3.02738	4.73649	5.76057	2.65895	3.03638	3.47316	6.07193	10.9296
BnaA03g19000D	GSBRNA2G00124708001	chrA03:8990792-8994179	1943	8.05407	6.86926	8.07318	8.55156	6.25468	6.92023	8.30383	7.9384	7.64758	7.8093	3.69512
BnaA03g19140D	GSBRNA2G00124693001	chrA03:9049906-9051849	1005	3.20644	3.06386	3.28573	3.04248	5.07681	5.95588	3.89866	4.44576	4.11967	5.4116	7.85117
BnaA03g19150D	GSBRNA2G00058447001	chrA03:9053889-9055010	691	9.96165	11.9384	7.99788	9.307	4.5186	5.64839	6.08659	8.92385	10.8866	3.30291	1.82554
BnaA03g19250D	GSBRNA2G00058434001	chrA03:9095209-9097196	1900	0.558408	26.3852	31.3834	24.8161	37.6486	46.4469	28.7468	29.1708	28.3494	19.9261	48.4403
BnaA03g19290D	GSBRNA2G00058430001	chrA03:9109164-9111517	1334	17.1654	7.27807	10.722	5.53382	2.07017	1.23777	4.83908	9.18889	6.00225	5.11219	0.48504
BnaA03g19320D	GSBRNA2G00058425001	chrA03:9130168-9131060	798	27.7182	36.4986	27.5141	35.3375	61.2222	66.0079	19.7419	30.4165	44.5563	56.6379	83.7434
BnaA03g19400D	GSBRNA2G00058414001	chrA03:9179761-9181920	1053	98.138	93.4475	91.4087	68.5373	43.8064	84.8751	58.8972	63.2353	61.6639	57.2037	22.4329
BnaA03g19650D	GSBRNA2G00058379001	chrA03:9316135-9316572	437	17.6467	908.518	726.58	647.598	1011.05	1131.95	638.045	831.37	825.672	496.393	1138.19
BnaA03g20210D	GSBRNA2G00139069001	chrA03:9616025-9618398	1398	2.15082	2.09202	2.6999	2.89178	2.65661	1.80871	2.85308	2.23629	3.70331	2.30422	5.05083
BnaA03g20780D	GSBRNA2G00139002001	chrA03:9855299-9856025	726	6.65118	16.5622	5.6605	7.9129	16.4529	14.549	5.08981	6.88257	9.30783	15.4945	15.0858
BnaA03g20980D	GSBRNA2G00138979001	chrA03:9941099-9942017	918	72.5388	54.174	62.8587	58.329	112.626	77.9222	65.8268	69.6827	57.634	105.552	150.563
BnaA03g21030D	GSBRNA2G00138973001	chrA03:9953678-9957137	2427	1.42498	1.29277	1.45345	1.93406	1.85702	1.4236	0.740444	0.926027	1.41334	0.734248	0.341226
BnaA03g21040D	GSBRNA2G00138972001	chrA03:9963917-9964889	936	21.1804	16.4224	17.3508	14.0411	10.6627	18.3669	17.9769	17.3063	16.0955	13.128	7.92381
BnaA03g21080D	GSBRNA2G00138967001	chrA03:9977442-9979509	2022	6.81647	7.20627	6.95917	7.88851	5.06831	5.64234	7.25613	6.83701	6.20886	4.56595	3.02842
BnaA03g21210D	GSBRNA2G00138951001	chrA03:10085703-10087242	1110	681.748	513.949	541.597	468.297	342.983	431.746	569.963	631.113	461.772	635.32	234.882
BnaA03g21310D	GSBRNA2G00138941001	chrA03:10118687-10120831	1786	10.8767	22.1018	24.9287	20.5707	27.9443	35.6935	23.7183	24.4906	26.8696	21.9966	37.4652
BnaA03g21360D	GSBRNA2G00138934001	chrA03:10142884-10147791	1854	18.7452	13.0789	13.4916	11.2746	8.44992	12.0955	13.6994	12.376	11.7922	11.5068	3.19505
BnaA03g21460D	GSBRNA2G00138923001	chrA03:10173562-10175159	945	2.4674	3.78094	3.40473	5.26588	6.21023	10.2696	3.78492	4.17689	5.43227	7.88776	6.53251
BnaA03g21590D	GSBRNA2G00138909001	chrA03:10232719-10234788	1783	5.85652	275.202	268.519	249.823	450.01	502.811	248.361	295.742	330.21	244.334	560.944
BnaA03g21600D	GSBRNA2G00138908001	chrA03:10239150-10239801	651	3.05101	212.74	204.534	190.719	266.268	262.753	184.657	226.95	249.033	141.319	343.908
BnaA03g21760D	GSBRNA2G00138892001	chrA03:10286056-10287159	538	20.2371	22.9726	17.6351	19.1486	15.6044	14.1753	21.0015	21.3428	19.6557	13.9704	6.73662
BnaA03g21800D	GSBRNA2G00138888001	chrA03:10297527-10300047	1326	155.884	122.253	146.439	140.404	216.348	196.15	134.443	139.187	143.482	182.564	292.141
BnaA03g21930D	GSBRNA2G00138871001	chrA03:10385361-10386765	1404	11.2972	9.78262	10.2537	7.61647	6.32687	8.73005	10.6784	9.70463	9.88674	6.29335	2.80324
BnaA03g22020D	GSBRNA2G00138860001	chrA03:10423617-10424040	423	61.3921	57.7102	54.7586	53.2877	39.3751	44.899	49.3548	57.5735	50.9361	43.8956	20.4554
BnaA03g22420D	GSBRNA2G00138815001	chrA03:10650718-10651117	399	10.5088	14.845	15.172	16.2578	34.5521	28.2818	10.2197	17.93	18.6025	36.4527	47.7524
BnaA03g22500D	GSBRNA2G00138807001	chrA03:10681807-10684654	815	0.956443	33.8674	33.9317	30.8778	53.3801	68.9818	37.2495	38.1707	36.3546	27.8733	71.3786
BnaA03g22710D	GSBRNA2G00138784001	chrA03:10799440-10801830	1901	1.27425	71.7643	71.5612	63.2258	104.635	126.384	67.1223	73.6666	79.1607	50.8423	126.69
BnaA03g23010D	GSBRNA2G00138746001	chrA03:10973596-10975155	1255	7.28742	14.8723	10.7936	23.6611	41.7052	38.8585	12.122	21.8629	23.736	40.6318	43.4195
BnaA03g23290D	GSBRNA2G00138707001	chrA03:11135067-11136172	1031	0.930858	21.3511	24.0874	18.2098	27.7755	31.9256	21.7971	24.0018	28.4178	15.6805	35.4737
BnaA03g23330D	GSBRNA2G00138703001	chrA03:11148018-11151160	1891	101.057	98.9689	84.4433	75.2174	56.0273	65.6948	75.9056	89.3456	84.1757	61.6387	37.7792
BnaA03g23340D	GSBRNA2G00138702001	chrA03:11151903-11154383	2328	13.5995	12.4265	12.084	10.1225	8.02059	7.37478	12.6709	10.6279	11.0946	7.68173	6.1784
BnaA03g23580D	GSBRNA2G00138676001	chrA03:11271408-11273915	2280	0.972957	13.6272	18.899	14.1347	22.7404	24.3287	15.5533	17.2129	18.1815	11.6228	24.2525
BnaA03g23610D	GSBRNA2G00138671001	chrA03:11303176-11306833	1209	31.5996	32.4566	26.6516	27.9232	20.1304	22.299	26.9637	27.4502	26.2358	20.8509	10.062
BnaA03g23660D	GSBRNA2G00138663001	chrA03:11345101-11347046	721	166.559	119.927	137.267	139.024	240.19	197.831	144.348	171.568	139.286	230.811	360.084
BnaA03g24240D	GSBRNA2G00151436001	chrA03:11660428-11661635	710	13.7659	13.4243	13.1432	13.933	30.1385	22.0166	12.9998	17.6756	15.9152	24.1885	35.7304
BnaA03g24370D	GSBRNA2G00151450001	chrA03:11714082-11722792	1684	3.72372	3.94935	4.34404	3.79176	5.46548	7.50237	5.53819	3.70212	4.25123	8.26378	15.7087
BnaA03g24410D	GSBRNA2G00151456001	chrA03:11752617-11758900	1259	32.92	25.5898	31.997	30.4879	65.238	58.842	26.2816	27.814	27.477	69.1424	79.7036
BnaA03g24470D	GSBRNA2G00151463001	chrA03:11787368-11790948	1553	11.111	10.0147	12.1995	10.4769	6.49864	7.98912	8.54577	9.07597	10.3634	9.14968	24.0058
BnaA03g24600D	GSBRNA2G00151477001	chrA03:11849343-11852925	2273	6.01603	6.91042	5.27989	4.83265	3.3823	5.72096	6.23293	6.89409	5.24271	5.51686	1.0448
BnaA03g24970D	GSBRNA2G00151527001	chrA03:12059435-12064106	2302	0.258209	0.321228	0.286366	0.3484	0.537479	0.748501	0.32802	0.416958	0.469239	0.739812	1.47928
BnaA03g25050D	GSBRNA2G00151535001	chrA03:12083222-12085218	1551	3.66021	2.30609	2.76793	2.1205	0.703939	0.257683	2.48805	3.50669	2.65089	0.580777	1.00307
BnaA03g25060D	GSBRNA2G00151536001	chrA03:12086164-12088269	1677	7.17097	5.80761	4.82921	4.05666	3.70808	2.85172	4.6459	5.70902	4.76163	3.5418	2.1755
BnaA03g25430D	GSBRNA2G00151581001	chrA03:12287493-12290325	1889	42.7463	36.0728	45.9521	37.9923	58.7894	63.1679	39.7173	35.9028	35.8623	72.6096	81.2199
BnaA03g25540D	GSBRNA2G00151596001	chrA03:12398350-12399935	1585	38.8698	43.2687	35.7013	33.3585	25.5065	18.5867	39.4326	39.1517	35.9217	20.4723	15.8843
BnaA03g25630D	GSBRNA2G00151606001	chrA03:12452672-12453915	1078	7.15562	11.1971	13.8422	16.6401	22.997	23.3772	8.13169	13.2542	19.4138	20.3111	18.0596
BnaA03g25640D	GSBRNA2G00151607001	chrA03:12454903-12456074	582	1.48856	1.968	1.5379	3.37078	9.28525	6.63014	3.47101	2.78723	2.08506	10.5702	7.61695
BnaA03g25700D	GSBRNA2G00151619001	chrA03:12539231-12539696	465	1.09483	37.1071	37.7759	31.4004	56.8433	70.8667	57.0076	53.5898	53.9356	30.8182	82.4668
BnaA03g25790D	GSBRNA2G00151629001	chrA03:12562037-12564737	1921	18.1124	14.3891	19.594	17.9871	13.8783	14.3626	20.025	16.3147	14.5741	13.0219	7.0939
BnaA03g25960D	GSBRNA2G00151651001	chrA03:12665454-12668281	2197	11.96	11.8913	10.8072	13.1093	14.1524	14.6613	11.3917	11.9544	12.8612	15.0436	23.1444
BnaA03g26210D	GSBRNA2G00151683001	chrA03:12829645-12833658	2212	1.55349	1.45727	1.90882	1.12947	0.646065	1.28714	2.13049	1.56119	1.44271	0.850055	0.136961
BnaA03g26220D	GSBRNA2G00151685001	chrA03:12840781-12841536	662	146.359	143.21	116.144	91.5089	70.2525	160.302	102.85	111.691	131.826	86.2293	8.98362
BnaA03g26600D	GSBRNA2G00112208001	chrA03:13046696-13047077	381	7.11519	25.4598	25.081	22.512	51.4276	52.1853	27.8641	27.9322	22.2636	19.5616	38.4359
BnaA03g27010D	GSBRNA2G00112149001	chrA03:13334907-13338162	1999	5.33847	8.75256	11.3694	9.5024	9.0722	11.0872	10.5284	11.0833	12.6428	11.7798	20.9861
BnaA03g27300D	GSBRNA2G00112110001	chrA03:13473348-13476537	2665	12.5208	17.636	12.3089	10.1352	7.97654	9.58211	15.8882	13.414	10.2753	6.74458	4.07499
BnaA03g27330D	GSBRNA2G00112107001	chrA03:13482441-13485855	2843	16.8569	14.2102	14.9587	12.2503	9.92829	13.9775	11.9804	14.1334	12.1909	12.2017	5.55222
BnaA03g27350D	GSBRNA2G00112105001	chrA03:13488872-13489461	384	9.06791	394.913	341.321	292.651	689.301	647.349	523.311	563.234	589.195	385.039	842.371
BnaA03g27360D	GSBRNA2G00112104001	chrA03:13490177-13493791	2861	2.35957	2.61372	2.11909	2.50926	3.00072	1.48747	2.29639	1.43492	1.78084	1.25861	0.673421
BnaA03g27540D	GSBRNA2G00112086001	chrA03:13552850-13555231	1828	2.82849	127.869	142.653	116.609	171.688	203.892	131.654	143.57	174.628	121.77	312.905
BnaA03g27560D	GSBRNA2G00112084001	chrA03:13562108-13562743	635	4.36246	273.489	251.953	246.512	257.148	305.819	181.514	221.563	268.542	146.286	419.763
BnaA03g27580D	GSBRNA2G00112082001	chrA03:13566390-13566771	381	1.60623	161.477	109.75	130.149	111.361	128.347	95.4574	124.026	155.109	43.5624	126.776
BnaA03g27650D	GSBRNA2G00112072001	chrA03:13589757-13592422	2151	0.312598	18.1483	19.8301	15.7176	26.0346	31.8829	19.9896	19.8841	20.301	13.9043	37.5614
BnaA03g27770D	GSBRNA2G00112057001	chrA03:13633435-13636441	2574	4.72301	3.91647	4.60676	5.08538	3.15281	2.4644	5.13309	4.3925	3.5771	2.75802	2.16276
BnaA03g27800D	GSBRNA2G00112054001	chrA03:13647141-13649470	1377	33.5901	29.4696	30.2516	26.5522	17.0782	21.093	25.685	33.0237	26.6702	17.3479	9.36133
BnaA03g28130D	GSBRNA2G00112015001	chrA03:13748463-13750949	1970	0.259922	26.9066	29.9286	25.3447	33.3362	37.9457	25.5282	28.4627	32.403	16.7955	45.8027
BnaA03g28480D	GSBRNA2G00111966001	chrA03:13905611-13907758	1348	8.13116	7.7945	7.9924	9.14508	10.7032	8.91662	10.4554	10.0408	9.34107	10.4368	15.0037
BnaA03g28510D	GSBRNA2G00111962001	chrA03:13916431-13920229	1162	5.5955	5.45597	5.14367	4.28208	2.75134	2.98963	6.30061	6.86779	5.80066	2.55954	1.57433
BnaA03g28540D	GSBRNA2G00111959001	chrA03:13926979-13928170	1164	0.442162	17.4737	13.2172	11.7083	32.1856	36.9233	13.301	16.1132	7.8003	6.84882	15.1167
BnaA03g28700D	GSBRNA2G00111939001	chrA03:13988824-13990887	1277	1.24845	8.95006	11.1779	10.6318	10.7791	10.2969	9.60054	10.8235	12.3693	7.88277	17.6998
BnaA03g28740D	GSBRNA2G00111935001	chrA03:14000826-14002404	1080	2.78345	211.671	217.24	213.28	246.663	268.224	174.69	209.316	241.63	125.608	303.703
BnaA03g28780D	GSBRNA2G00111931001	chrA03:14009780-14011244	773	1.57427	1.67322	1.82615	2.12101	4.12538	3.27178	2.62844	2.24726	3.557	6.5065	32.8208
BnaA03g29100D	GSBRNA2G00111896001	chrA03:14139727-14142333	2340	1.47903	75.9673	79.9738	65.7851	112.431	123.857	81.3427	96.0334	94.6778	76.3572	191.798
BnaA03g29240D	GSBRNA2G00111879001	chrA03:14224591-14225789	934	1.25822	24.6204	45.6931	22.4932	62.6999	80.7658	34.8897	39.575	24.6727	22.6553	58.9625
BnaA03g29440D	GSBRNA2G00111858001	chrA03:14316132-14320016	2816	27.2334	22.37	27.4741	22.8363	19.2613	27.8966	23.1098	22.9744	21.812	21.52	7.31478
BnaA03g29810D	GSBRNA2G00111814001	chrA03:14491308-14494216	2011	10.3726	11.0376	9.72046	11.212	11.5508	8.19815	6.48091	7.58983	8.69304	6.5636	4.28672
BnaA03g30000D	GSBRNA2G00111793001	chrA03:14578550-14581197	1942	1.95722	2.82517	1.90716	2.66959	2.66275	1.46577	1.74993	1.59348	1.72756	1.35517	0.439473
BnaA03g30060D	GSBRNA2G00111785001	chrA03:14597553-14600224	2321	1.44945	2.63937	2.68448	2.69009	3.34647	1.88749	2.68204	2.49914	3.07649	2.13391	3.50992
BnaA03g30180D	GSBRNA2G00111771001	chrA03:14640282-14642602	2124	2.24845	66.212	101.088	75.6492	75.6708	85.2509	144.929	152.245	147.785	195.951	459.047
BnaA03g30400D	GSBRNA2G00111741001	chrA03:14769681-14774468	3176	8.93796	10.0017	7.86715	8.25778	6.95457	6.52949	7.98453	9.18704	8.27463	6.79298	2.80337
BnaA03g30530D	GSBRNA2G00111727001	chrA03:14815773-14818944	1900	5.27659	7.95845	8.26107	7.147	8.40841	8.76813	7.35196	8.78628	8.10342	6.68331	9.81174
BnaA03g30760D	GSBRNA2G00111703001	chrA03:14892794-14894748	1350	1.45402	3.59525	3.92431	3.05411	3.17891	2.90487	3.55129	4.19598	3.30215	4.05512	7.67173
BnaA03g31030D	GSBRNA2G00111672001	chrA03:15001066-15005228	2459	0.188248	0.273026	0.227608	0.188649	0.162263	0.214615	0.655953	0.246007	0.961221	0.744063	1.663
BnaA03g31290D	GSBRNA2G00111644001	chrA03:15113711-15117560	2258	9.33028	9.47147	9.00766	8.73955	11.0419	6.81761	7.98072	7.7367	8.97201	7.00696	4.0821
BnaA03g31320D	GSBRNA2G00111641001	chrA03:15123962-15125449	911	24.8968	25.2779	22.7925	28.0775	39.2927	36.1728	23.2751	29.624	26.9345	42.7061	52.2462
BnaA03g31560D	GSBRNA2G00111610001	chrA03:15229364-15229841	477	52.9346	35.46	37.3524	28.0849	21.691	36.677	26.0089	40.8526	32.6343	26.9445	4.37825
BnaA03g31930D	GSBRNA2G00111559001	chrA03:15420095-15421395	855	1.0275	78.7106	69.2019	73.4608	86.5021	94.5673	57.8583	80.7185	88.2508	39.8073	110.491
BnaA03g31960D	GSBRNA2G00111556001	chrA03:15426636-15428603	1422	30.6881	28.3714	30.3146	33.0406	51.675	52.8555	28.4898	37.3057	38.1337	57.5625	74.2862
BnaA03g32080D	GSBRNA2G00111542001	chrA03:15485116-15487194	873	4.02733	2.36452	3.11763	3.30011	4.52027	6.75464	3.13482	3.40294	3.63242	4.93601	9.07413
BnaA03g32250D	GSBRNA2G00111521001	chrA03:15563729-15566374	1977	10.0194	9.68403	10.8511	10.1496	15.1106	14.9349	10.1166	11.4497	10.4448	15.6231	20.7791
BnaA03g32610D	GSBRNA2G00137727001	chrA03:15757831-15761860	1992	3.37089	3.4524	3.05768	2.52374	2.8226	3.12731	2.92012	3.2719	3.18393	3.20106	1.18967
BnaA03g32800D	GSBRNA2G00137700001	chrA03:15835061-15837447	2060	0.92004	21.38	28.6374	16.4332	48.9276	60.6587	23.171	25.4069	21.8188	15.9096	36.7963
BnaA03g32810D	GSBRNA2G00137699001	chrA03:15839251-15842058	1932	5.65339	292.02	261.32	234.907	429.056	448.48	237.997	286.727	306.537	211.904	537.251
BnaA03g33790D	GSBRNA2G00137580001	chrA03:16358257-16359218	940	13.7347	30.5734	27.5927	53.7847	74.6854	59.3355	20.3659	46.3702	58.3277	59.6689	35.3632
BnaA03g34230D	GSBRNA2G00137521001	chrA03:16685854-16687072	1089	1.23402	2.1516	2.10757	3.45138	6.3328	3.93525	2.53729	3.44268	4.33945	5.22689	5.53283
BnaA03g34240D	GSBRNA2G00137520001	chrA03:16690707-16691303	596	11.9054	11.2663	12.7623	12.8669	18.9132	17.5034	14.8859	12.6977	14.7596	20.4858	23.6993
BnaA03g34410D	GSBRNA2G00137501001	chrA03:16754313-16755968	1265	2.78983	173.818	148.462	153.833	220.958	235.075	130.333	159.228	177.431	122.427	290.987
BnaA03g34740D	GSBRNA2G00137467001	chrA03:16885015-16886324	612	1.26277	2.36177	1.02339	2.18112	7.20555	9.23878	1.10253	2.42029	2.192	5.32529	9.43548
BnaA03g34780D	GSBRNA2G00137462001	chrA03:16906496-16908478	1130	0.833819	0.595587	0.505179	0.325756	1.7561	1.2364	1.3109	0.806433	0.98644	1.55632	5.70655
BnaA03g34850D	GSBRNA2G00137454001	chrA03:17014758-17018134	1932	9.65706	9.37099	9.30171	9.522	10.1754	8.55605	6.11914	7.27671	8.59122	6.48422	2.90137
BnaA03g34920D	GSBRNA2G00137446001	chrA03:17039020-17041541	1545	0.913104	2.54198	2.66073	2.27577	2.52588	3.26721	2.55898	2.57634	2.08737	1.72524	3.35572
BnaA03g34960D	GSBRNA2G00137442001	chrA03:17053224-17056487	2289	0.53136	26.9146	28.1771	23.3938	35.7246	41.8049	26.2317	28.5437	28.3843	20.2258	49.0795
BnaA03g35510D	GSBRNA2G00137372001	chrA03:17336719-17343664	3591	5.34814	5.20874	5.56201	5.24359	3.37778	4.74948	5.35833	5.20076	4.8508	4.78601	2.21646
BnaA03g35520D	GSBRNA2G00137371001	chrA03:17345517-17348242	1809	4.99874	22.5679	24.6116	23.2032	38.9489	43.6494	24.7532	25.9195	30.5269	29.115	47.5363
BnaA03g35630D	GSBRNA2G00137360001	chrA03:17398863-17401047	2046	1.25531	19.5759	22.8174	16.8132	27.5146	31.1851	20.9941	20.2451	20.7666	15.1221	34.3231
BnaA03g35840D	GSBRNA2G00137338001	chrA03:17499785-17502483	2007	0.577361	38.5195	37.7227	32.4902	50.7782	59.886	37.2063	37.3896	40.3814	27.1661	65.8957
BnaA03g35880D	GSBRNA2G00137333001	chrA03:17528724-17530573	1623	2.04948	3.14641	2.53949	1.71498	2.34953	1.66839	4.26285	1.8809	1.64407	3.04584	5.8022
BnaA03g35940D	GSBRNA2G00137323001	chrA03:17578807-17578996	189	4.64564	66.7631	156.397	76.7942	302.182	464.858	130.403	88.9074	75.2578	12.9166	87.2504
BnaA03g35980D	GSBRNA2G00137319001	chrA03:17592028-17593794	1145	7.50703	7.37385	7.58289	9.22013	12.5445	12.2238	7.18199	8.16677	9.41461	14.1955	17.1335
BnaA03g36080D	GSBRNA2G00137306001	chrA03:17633981-17637490	1999	28.1982	24.7014	22.887	19.0105	9.76744	17.2814	19.2213	22.5231	23.2734	14.1517	3.62919
BnaA03g36390D	GSBRNA2G00154770001	chrA03:17814355-17816156	1305	7.43166	44.0593	58.6597	45.958	67.6082	73.6719	51.7398	59.4187	65.8844	36.0085	78.6997
BnaA03g36400D	GSBRNA2G00154771001	chrA03:17819474-17820757	779	16.2921	16.7222	11.5574	11.8407	8.1753	10.9503	5.67747	10.376	11.3609	8.16416	0.489114
BnaA03g36620D	GSBRNA2G00154805001	chrA03:17988397-17992403	1358	1.69989	1.20833	1.48921	1.87654	2.48257	2.4965	1.73215	1.44865	2.28051	1.96956	6.30262
BnaA03g36640D	GSBRNA2G00154809001	chrA03:18014957-18017182	1611	18.5522	16.8893	16.5587	14.774	10.6405	12.9179	16.2185	17.8553	16.3275	10.8847	6.76085
BnaA03g36810D	GSBRNA2G00154830001	chrA03:18085643-18087008	847	72.744	66.0184	61.3028	94.646	173.641	100.006	92.982	110.52	104.743	182.851	104.793
BnaA03g36950D	GSBRNA2G00154851001	chrA03:18202682-18204981	1163	20.3646	22.5104	15.791	16.1227	16.6919	10.7915	14.7407	19.8434	15.4021	13.4191	9.27708
BnaA03g37150D	GSBRNA2G00154879001	chrA03:18363031-18366620	2212	3.10114	2.10772	2.72418	3.89427	3.99826	2.37239	2.98324	2.57305	2.51955	3.68661	6.77488
BnaA03g37240D	GSBRNA2G00154888001	chrA03:18418553-18422075	1968	9.3302	9.19775	8.65718	10.1514	8.89335	6.61007	6.48627	7.39413	8.59626	7.44044	4.27828
BnaA03g37260D	GSBRNA2G00154891001	chrA03:18437241-18439520	1825	7.52182	12.3258	13.9983	11.4758	18.565	39.3507	13.9706	13.3664	17.7255	19.7255	26.6197
BnaA03g37560D	GSBRNA2G00154928001	chrA03:18625003-18628657	2958	0.130558	6.16413	7.71614	5.98224	7.16947	10.3715	5.41057	7.3776	7.93621	4.40744	13.0796
BnaA03g37660D	GSBRNA2G00154943001	chrA03:18679135-18680858	978	7.68613	8.10221	6.98731	6.81841	5.31405	4.02162	7.55759	6.87051	6.8939	4.58827	2.77095
BnaA03g37780D	GSBRNA2G00154962001	chrA03:18792098-18793897	1276	2.98391	3.00032	2.53313	3.04521	5.36635	3.88142	4.31693	2.23806	3.0637	3.62083	9.09662
BnaA03g38050D	GSBRNA2G00154994001	chrA03:18912550-18913766	737	4.47102	2.95048	4.20739	2.18889	4.22551	1.08326	4.10526	3.28196	2.23791	4.03203	10.1551
BnaA03g38350D	GSBRNA2G00155027001	chrA03:19055817-19057032	1215	0.341031	19.6386	18.9192	15.219	27.0966	33.9809	18.3314	19.3101	21.7927	14.0783	34.2407
BnaA03g38630D	GSBRNA2G00155060001	chrA03:19202988-19203618	630	14.816	12.7895	11.5862	13.9912	11.1832	14.9758	28.2467	0.29161	1.18706	58.2825	4.44745
BnaA03g38750D	GSBRNA2G00155074001	chrA03:19252750-19253605	638	174.019	236.952	133.363	127.092	96.6718	136.193	131.444	180.527	173.656	69.4213	16.6838
BnaA03g38910D	GSBRNA2G00113709001	chrA03:19347039-19349443	2102	0.638005	24.3351	32.0829	15.4863	43.7746	57.4866	25.8218	26.7579	24.8365	21.5071	37.8972
BnaA03g39260D	GSBRNA2G00113661001	chrA03:19570110-19575083	3124	0.426413	11.3383	17.0595	8.6965	27.3185	39.1635	12.6713	13.2235	11.3833	8.84501	23.2547
BnaA03g39380D	GSBRNA2G00113647001	chrA03:19618018-19620362	1567	66.6025	63.5985	46.5363	54.978	54.338	57.0907	37.0556	48.069	62.0226	51.0671	25.7476
BnaA03g39450D	GSBRNA2G00113639001	chrA03:19678551-19679859	1146	1.54292	2.77879	3.32666	4.84745	4.92752	4.39782	2.7274	3.70845	5.49171	8.06026	2.51042
BnaA03g39490D	GSBRNA2G00113633001	chrA03:19704426-19706651	1565	1.32122	63.6127	66.9723	57.2864	96.9797	107.29	60.779	69.598	73.2543	54.5418	138.834
BnaA03g39800D	GSBRNA2G00113597001	chrA03:19869668-19873655	2349	2.20197	2.13049	1.47293	0.949388	1.1751	1.09558	0.896379	1.19355	1.25522	2.84712	0.53804
BnaA03g39840D	GSBRNA2G00113591001	chrA03:19904739-19911257	4059	0.298117	0.666602	1.29014	0.980702	1.4109	1.26205	0.882949	0.982776	1.1791	0.949409	1.2977
BnaA03g39920D	GSBRNA2G00113580001	chrA03:19950314-19952033	1020	6.23326	5.21036	6.82182	6.9133	5.90686	3.68519	3.09118	4.72752	5.37278	3.12488	1.14754
BnaA03g39930D	GSBRNA2G00113579001	chrA03:19952317-19954531	2031	5.03014	5.10507	5.42177	4.50814	3.22415	3.17673	4.90034	5.21378	4.45824	3.38582	2.04742
BnaA03g39970D	GSBRNA2G00113575001	chrA03:19965465-19969594	1353	4.27917	3.43972	4.51715	5.1231	6.71452	5.74128	4.59112	4.67168	5.29712	7.89702	13.3531
BnaA03g39990D	GSBRNA2G00113572001	chrA03:19973330-19974415	707	19.9192	17.9267	20.0837	25.4224	25.8708	16.2005	13.9868	16.9287	19.0154	16.3339	8.88574
BnaA03g40020D	GSBRNA2G00113567001	chrA03:19999270-20001084	1449	9.35439	9.25177	9.77564	11.6376	17.1724	18.4199	9.90315	10.4596	11.7257	19.0131	29.814
BnaA03g40200D	GSBRNA2G00113545001	chrA03:20093859-20095203	1085	9.98192	12.4132	10.5281	10.0434	4.08676	9.52576	11.2509	9.30054	11.2678	8.12527	4.05362
BnaA03g40500D	GSBRNA2G00113509001	chrA03:20235011-20236815	1202	2.58716	27.521	52.2802	22.5127	79.6495	153.834	36.5263	40.46	29.1214	21.605	44.784
BnaA03g40550D	GSBRNA2G00113502001	chrA03:20262036-20265097	2910	3.59422	3.36262	3.19817	3.20408	2.31342	2.6939	3.16493	2.73791	3.18052	2.00056	1.12705
BnaA03g40660D	GSBRNA2G00113484001	chrA03:20320936-20321894	865	3.3008	4.28517	3.26978	6.33666	15.5846	7.75432	2.24187	3.83026	6.70116	6.19932	9.16421
BnaA03g40670D	GSBRNA2G00113482001	chrA03:20344632-20346241	1609	13.6102	14.0495	14.178	15.4596	14.1889	11.2222	9.85036	11.6431	13.5939	9.92535	5.91587
BnaA03g40730D	GSBRNA2G00113472001	chrA03:20375881-20378781	1783	2.78516	2.75704	2.6112	2.84351	3.19578	3.59324	3.22165	3.35524	3.08242	3.66829	5.65519
BnaA03g40940D	GSBRNA2G00151354001	chrA03:20495320-20496008	571	34.2073	51.5358	50.1835	57.3314	67.4426	86.9174	52.6782	75.4485	61.0678	86.7207	35.8491
BnaA03g41040D	GSBRNA2G00151334001	chrA03:20586900-20589106	1737	11.7633	17.4642	19.9016	17.4072	20.1038	24.3313	17.9221	20.7772	20.1646	19.1245	29.4032
BnaA03g41350D	GSBRNA2G00151295001	chrA03:20711307-20713211	1231	12.0249	11.8491	10.8382	7.87466	7.62105	11.727	10.301	10.8503	11.1447	10.0373	5.06034
BnaA03g41560D	GSBRNA2G00151269001	chrA03:20873767-20876322	1771	1.78957	1.85446	2.58589	2.54774	2.67931	2.08229	2.94666	2.21251	2.7977	2.85019	5.59024
BnaA03g41800D	GSBRNA2G00151240001	chrA03:20980109-20981012	903	0.56229	24.8707	31.5747	24.9263	24.0529	25.6198	27.3298	32.6911	29.7976	22.9044	47.7461
BnaA03g41830D	GSBRNA2G00151237001	chrA03:21002900-21009535	1718	3.79079	3.51286	3.38522	4.13712	3.02546	2.1057	3.47169	2.98669	3.97909	2.00734	1.23999
BnaA03g41960D	GSBRNA2G00151221001	chrA03:21074015-21079798	3183	10.3808	40.6639	42.2655	37.966	55.3472	67.9277	36.6719	41.4418	43.3044	27.3858	58.3556
BnaA03g42110D	GSBRNA2G00151204001	chrA03:21142637-21144423	1258	6.2693	5.39281	3.80278	6.94739	8.7753	14.401	6.42937	4.50429	10.9293	9.38957	13.9359
BnaA03g42280D	GSBRNA2G00151186001	chrA03:21222665-21223941	981	1.98108	1.58199	1.67927	2.03242	3.58408	2.53987	2.52092	2.11425	1.99575	2.32963	5.7445
BnaA03g42330D	GSBRNA2G00151180001	chrA03:21251454-21254957	2116	4.0205	5.1968	7.05626	5.40237	4.7111	5.78161	5.66081	6.93847	5.87929	8.09512	9.15375
BnaA03g43160D	GSBRNA2G00151077001	chrA03:21656092-21658698	1051	0.63261	1.22266	1.21376	1.93584	3.30132	11.9038	1.08945	2.0256	4.61429	5.47302	6.40832
BnaA03g43210D	GSBRNA2G00151072001	chrA03:21668803-21671156	2225	21.1217	28.7535	22.0834	24.8348	12.9636	13.4333	26.8068	24.0613	21.6531	10.6544	7.13259
BnaA03g43350D	GSBRNA2G00151056001	chrA03:21779150-21780989	1051	0.554795	13.3689	12.7835	9.02248	12.8907	15.0007	10.4749	11.7665	12.0228	6.66122	15.2387
BnaA03g43530D	GSBRNA2G00151035001	chrA03:21894894-21900824	2399	5.71415	5.02325	4.83767	4.37524	2.29197	2.66042	3.28587	4.94101	5.01975	3.29747	0.602804
BnaA03g43580D	GSBRNA2G00151030001	chrA03:21953244-21955187	1154	29.2821	29.8449	32.5293	32.7815	62.4694	72.1292	23.8209	31.4013	40.2925	61.0685	91.0729
BnaA03g43870D	GSBRNA2G00106633001	chrA03:22100555-22102677	1044	4.36133	3.78505	4.77923	4.18788	6.74767	7.67335	4.48248	3.81113	3.81348	7.19725	13.5473
BnaA03g43960D	GSBRNA2G00106651001	chrA03:22188553-22190997	1856	11.459	10.7112	10.1839	8.03291	12.6536	18.087	8.56342	10.3053	12.7607	11.3076	3.54346
BnaA03g44400D	GSBRNA2G00106708001	chrA03:22506081-22509266	1839	6.12026	6.47505	7.59848	7.37702	7.64914	7.23596	7.11601	8.00783	6.59923	7.60197	11.4455
BnaA03g45080D	GSBRNA2G00106793001	chrA03:22896024-22897680	1482	16.4543	12.5637	13.4891	14.6256	9.65533	10.4354	9.86689	8.78235	15.4438	13.3595	6.03994
BnaA03g45390D	GSBRNA2G00106829001	chrA03:23078716-23082048	801	38.9466	42.0824	35.4939	46.0258	24.2199	35.2184	33.4377	37.6629	32.6568	26.6801	11.8417
BnaA03g45520D	GSBRNA2G00106848001	chrA03:23168937-23170659	1245	3.41188	4.90994	3.16555	3.588	2.58173	2.30937	4.32838	4.67422	3.8741	1.89133	0.770501
BnaA03g45700D	GSBRNA2G00106871001	chrA03:23294015-23297428	2190	1.11244	1.07593	1.18659	1.36174	1.68445	2.33251	1.47821	1.02858	1.40106	2.06062	2.88417
BnaA03g45950D	GSBRNA2G00048856001	chrA03:23444589-23446032	1185	13.0468	10.9469	12.0278	16.98	11.1892	7.78367	21.785	16.4197	12.6986	14.3448	4.90156
BnaA03g46420D	GSBRNA2G00048928001	chrA03:23828310-23828938	628	25.1773	26.7684	32.199	24.991	49.9475	47.1896	31.6953	33.8427	35.2516	41.5662	48.321
BnaA03g46510D	GSBRNA2G00048937001	chrA03:23880652-23884164	2616	1.15736	0.633189	0.876211	1.19551	1.04793	1.06002	0.624514	0.779271	0.833129	0.979189	2.46195
BnaA03g47600D	GSBRNA2G00096119001	chrA03:24427989-24431905	2733	11.0019	10.5298	10.7164	11.0084	11.7016	9.84885	7.12541	8.1229	9.4373	6.42061	4.1398
BnaA03g47610D	GSBRNA2G00096118001	chrA03:24432494-24436681	900	15.8545	18.0427	13.705	15.6885	12.6232	11.7051	12.8185	14.072	15.7291	9.93952	6.40904
BnaA03g47910D	GSBRNA2G00075294001	chrA03:24653637-24656658	1281	16.5854	91.5245	76.724	77.7434	77.4003	111.083	63.9535	78.2433	99.4947	49.7559	114.972
BnaA03g48570D	GSBRNA2G00044271001	chrA03:24911780-24913426	1424	2.46523	4.62322	2.95078	5.48374	7.77982	12.0362	5.66963	6.25728	10.9279	12.1504	12.3505
BnaA03g48600D	GSBRNA2G00044274001	chrA03:24923357-24924691	807	31.2984	32.6622	28.6115	28.1846	23.6498	19.4847	26.9646	27.1662	29.0885	20.4316	8.36627
BnaA03g48610D	GSBRNA2G00044275001	chrA03:24925030-24928671	2163	29.0091	44.7142	28.5303	27.7797	20.7026	16.1813	27.8916	34.1773	29.5945	16.3482	12.2886
BnaA03g48660D	GSBRNA2G00044281001	chrA03:24953213-24953825	519	3.77294	147.991	125.097	114.763	202.345	232.325	120.09	144.616	156.198	97.4582	259.951
BnaA03g48940D	GSBRNA2G00044320001	chrA03:25159851-25163957	2106	0.19647	1.37814	1.66105	1.3224	1.85721	3.09212	1.50939	1.59864	1.75799	1.06667	2.07761
BnaA03g48950D	GSBRNA2G00044321001	chrA03:25164134-25165881	720	28.2765	35.1864	28.5972	26.1843	15.8814	22.4253	30.1421	33.3955	29.265	18.2132	11.8851
BnaA03g49190D	GSBRNA2G00044356001	chrA03:25319270-25320844	1149	104.24	84.5638	71.0245	59.6656	43.476	60.1319	49.3997	62.7991	57.4061	66.0937	21.2993
BnaA03g49570D	GSBRNA2G00044824001	chrA03:25584041-25586173	1498	6.64023	7.83695	5.60046	5.73824	3.74507	3.96134	5.26173	5.14811	6.75782	4.33028	2.24132
BnaA03g49910D	GSBRNA2G00044767001	chrA03:25832689-25836495	2881	50.8968	53.8529	53.4071	49.8755	40.2354	51.6235	61.5239	53.8164	48.7675	38.471	19.6972
BnaA03g50050D	GSBRNA2G00067401001	chrA03:25936683-25938103	1131	27.8213	22.9575	17.2187	16.2794	12.2661	17.2238	14.9159	13.8285	20.6539	21.277	7.60488
BnaA03g50120D	GSBRNA2G00067411001	chrA03:25984484-25985930	1389	0.455913	0.370895	0.300293	0.498308	0.583433	0.529252	0.473639	0.389876	0.485534	1.04751	2.31618
BnaA03g50170D	GSBRNA2G00067421001	chrA03:26032819-26034296	1477	6.67041	13.0749	14.2947	20.4557	42.5683	56.0497	11.3972	18.2487	26.1203	33.7495	34.1879
BnaA03g50190D	GSBRNA2G00067424001	chrA03:26047993-26059250	529	2.91684	2.15794	3.39874	4.33059	7.4812	8.15866	1.48057	3.49572	1.91568	3.98732	16.6346
BnaA03g50240D	GSBRNA2G00067431001	chrA03:26085420-26087234	1117	4.0532	3.27655	2.61193	5.42056	6.38601	5.53017	4.44827	3.37276	7.22391	7.69889	11.0041
BnaA03g50250D	GSBRNA2G00067432001	chrA03:26087830-26090699	2279	12.0029	11.1586	10.691	10.4477	6.16253	9.81731	9.90893	9.76602	9.50184	7.09987	2.75525
BnaA03g50770D	GSBRNA2G00092678001	chrA03:26372941-26375158	1899	0.75697	37.0168	47.0196	26.2339	50.1936	55.5437	36.7139	43.6582	37.8486	29.9724	50.083
BnaA03g50780D	GSBRNA2G00092679001	chrA03:26376351-26378241	1797	0.407204	22.1088	27.6352	17.6121	30.5664	29.7961	21.8899	25.2776	22.2706	16.9489	26.7583
BnaA03g50840D	GSBRNA2G00092686001	chrA03:26398085-26401803	2088	2.53404	2.02845	2.33321	2.98698	2.8444	2.18196	3.25177	3.25292	3.13885	3.26739	5.67954
BnaA03g50900D	GSBRNA2G00092692001	chrA03:26413783-26416153	1143	22.0119	28.8892	28.1338	32.8693	50.6373	52.6813	27.7875	33.4196	39.3478	52.262	55.8857
BnaA03g51290D	GSBRNA2G00077688001	chrA03:26623309-26627694	1998	4.33603	4.89137	4.11627	5.30559	4.62653	4.01539	3.06709	3.69365	4.29591	2.71242	1.30848
BnaA03g51590D	GSBRNA2G00077733001	chrA03:26810566-26812517	1451	3.45516	9.44533	4.7634	8.06585	11.5568	12.5334	5.1666	7.19433	10.9791	13.8969	3.60636
BnaA03g51820D	GSBRNA2G00077764001	chrA03:26980814-26983255	1485	7.84116	12.7481	8.25343	10.4791	9.66164	5.36937	7.92163	7.82593	10.1972	3.98028	0.825883
BnaA03g51830D	GSBRNA2G00077765001	chrA03:26983637-26986360	1952	3.6512	4.21669	3.71501	3.35631	2.71857	2.99428	3.61377	4.07028	3.20232	2.75596	1.41524
BnaA03g51900D	GSBRNA2G00077773001	chrA03:27019151-27020903	1300	7.14783	7.18179	6.55154	8.73404	12.1677	14.4844	6.59926	8.24325	9.28739	12.8888	16.7853
BnaA03g52800D	GSBRNA2G00081759001	chrA03:27574000-27575233	897	7.33006	6.95356	6.46695	7.82636	5.40719	7.34099	7.43032	6.03417	8.08357	7.0211	2.29593
BnaA03g52920D	GSBRNA2G00081775001	chrA03:27631824-27632536	712	234.687	227.94	206.158	181.618	131.812	124.297	183.355	233.478	184.839	122.424	56.2771
BnaA03g52940D	GSBRNA2G00081778001	chrA03:27658342-27665800	2058	11.1554	9.42063	9.16428	6.05661	3.76095	4.29192	5.16123	6.90401	6.12757	5.20546	1.07951
BnaA03g53010D	GSBRNA2G00081792001	chrA03:27706467-27708940	2473	52.2119	42.281	46.4234	44.8642	39.3888	36.8642	44.3896	41.0372	37.5356	39.2519	14.5275
BnaA03g53100D	GSBRNA2G00071521001	chrA03:27772937-27775498	2561	103.101	96.3527	97.2788	84.3921	64.8748	85.4419	102.473	103.971	87.5424	67.4819	33.6042
BnaA03g53130D	GSBRNA2G00071518001	chrA03:27788160-27792685	3026	1.28733	82.5481	81.5701	72.9758	109.576	134.465	74.3022	80.3665	94.2065	60.6155	148.811
BnaA03g53200D	GSBRNA2G00071506001	chrA03:27891413-27893438	1644	0.343333	12.9578	14.2305	12.4032	17.957	22.3967	11.7357	13.8174	14.6086	9.69855	19.8362
BnaA03g53460D	GSBRNA2G00075217001	chrA03:28047516-28048767	998	27.6546	20.709	23.2711	21.3599	8.69248	10.5254	24.5327	24.787	20.0428	12.6572	6.52051
BnaA03g53730D	GSBRNA2G00075258001	chrA03:28287607-28289684	1242	3.88633	4.70763	4.13322	3.92648	4.24893	9.33361	9.68139	4.97617	6.38689	11.776	46.0572
BnaA03g54160D	GSBRNA2G00043295001	chrA03:28665462-28670636	3467	9.58096	11.1188	9.66287	7.71237	7.8168	9.52392	8.94549	8.63626	8.79811	8.367	2.30472
BnaA03g54320D	GSBRNA2G00050163001	chrA03:28846998-28851054	1219	9.20085	11.6671	6.89303	5.88365	6.33528	5.03147	6.48788	6.62067	6.59774	4.37286	2.09454
BnaA03g54960D	GSBRNA2G00016416001	chrA03_random:93362-94584	1008	15.0261	16.1198	15.2753	16.5273	16.5177	13.5085	11.3397	12.6937	13.7994	9.48505	6.55593
BnaA03g55050D	GSBRNA2G00016425001	chrA03_random:122108-124620	1219	17.1821	16.5084	13.6584	14.1106	13.5874	11.4469	11.142	13.4354	14.8865	9.99157	5.95333
BnaA03g55080D	GSBRNA2G00098202001	chrA03_random:145838-147611	1512	4.07429	4.59122	3.32425	3.39225	2.84949	1.9497	3.61069	3.26843	3.67169	2.29203	1.46942
BnaA03g55180D	GSBRNA2G00004964001	chrA03_random:196206-198426	1609	4.91729	4.08518	4.2568	4.06979	1.93157	2.52845	4.73157	3.89084	4.77541	2.43991	1.32712
BnaA03g55320D	GSBRNA2G00017317001	chrA03_random:251175-251883	708	11.4149	29.1782	17.8983	40.152	109.608	108.571	15.0265	35.7368	55.4931	89.0878	71.438
BnaA03g55480D	GSBRNA2G00017334001	chrA03_random:303636-306083	1957	37.6207	37.3406	35.6973	34.813	28.0884	36.4287	32.0311	32.4339	33.1429	21.7039	12.0254
BnaA03g55560D	GSBRNA2G00025284001	chrA03_random:329240-331555	1638	6.93483	6.11812	15.3197	14.2649	31.6343	6.46441	9.30798	6.26544	12.9635	8.90563	15.3005
BnaA03g55860D	GSBRNA2G00019720001	chrA03_random:445806-451618	3872	1.69483	1.97929	2.82988	3.55574	9.24965	5.47185	2.11929	2.23932	4.24811	5.07517	5.81599
BnaA03g55940D	GSBRNA2G00019732001	chrA03_random:487337-489053	1202	22.4234	22.1504	20.6403	19.2762	15.4677	23.4712	17.1861	22.6902	17.7513	19.7045	5.44735
BnaA03g56350D	GSBRNA2G00060485001	chrA03_random:680995-682125	510	38.5303	29.2041	40.9058	41.618	30.0821	42.4159	40.1559	39.6552	36.0505	33.0313	12.8207
BnaA03g56650D	GSBRNA2G00023690001	chrA03_random:805704-806935	541	9.63999	5.9714	6.75512	6.38315	6.81002	5.98751	9.27068	8.2427	9.51406	7.24993	22.8492
BnaA03g56770D	GSBRNA2G00066780001	chrA03_random:864404-865712	1308	0.715516	5.99011	6.20744	6.04867	10.0963	11.3205	6.2271	6.36768	8.0951	4.51054	11.8977
BnaA03g56990D	GSBRNA2G00096788001	chrA03_random:950826-952038	1212	0.803824	35.196	35.7774	28.1869	57.5315	75.5626	37.0383	43.1585	39.8229	26.7306	70.3803
BnaA03g57170D	GSBRNA2G00035807001	chrA03_random:1028959-1034036	2370	3.40037	3.30934	3.05444	2.53544	4.21195	4.24391	3.50596	2.97863	3.34094	4.59958	7.58935
BnaA03g57190D	GSBRNA2G00035809001	chrA03_random:1038924-1040745	1081	4.81428	5.77352	4.61704	4.62495	1.62818	2.24914	3.4109	4.62332	3.78904	2.2373	1.09482
BnaA03g57420D	GSBRNA2G00023474001	chrA03_random:1138518-1140279	1761	0.406127	3.79551	4.32232	3.12928	4.2418	4.96721	5.705	4.805	5.96326	2.8848	8.40992
BnaA03g57520D	GSBRNA2G00023636001	chrA03_random:1206889-1209620	1134	30.6915	26.3553	28.359	25.5667	40.3931	45.4694	28.7977	29.5707	28.6267	42.9279	60.4597
BnaA03g57550D	GSBRNA2G00023639001	chrA03_random:1217668-1219507	1157	26.3816	34.9231	26.4323	32.0808	61.2974	31.3171	39.0579	36.2757	28.4417	39.7492	56.9344
BnaA03g57630D	GSBRNA2G00062822001	chrA03_random:1244001-1246418	1506	1.75802	1.92297	2.85853	2.73562	3.77926	2.96445	2.82501	2.6017	2.98445	2.91286	4.86538
BnaA03g57640D	GSBRNA2G00062823001	chrA03_random:1246525-1248202	1266	1.4686	2.10701	3.91652	2.68367	3.63955	3.03226	3.22819	2.75425	3.72251	2.12555	4.41548
BnaA03g57660D	GSBRNA2G00046687001	chrA03_random:1260798-1266916	2602	71.7872	62.5803	58.652	67.1906	47.4318	43.3917	66.5708	64.2377	58.6096	56.3072	31.7601
BnaA03g57690D	GSBRNA2G00006679001	chrA03_random:1276986-1279099	1347	2.91659	1.43919	2.79611	1.80663	3.54688	2.52982	0.737421	0.716635	1.09776	2.46934	0.72821
BnaA03g57940D	GSBRNA2G00017080001	chrA03_random:1393075-1395450	1877	3.62533	4.40914	4.43818	3.98466	4.4464	4.09665	5.66402	4.14844	4.5577	4.84152	7.62139
BnaA03g58260D	GSBRNA2G00017146001	chrA03_random:1610230-1613319	1564	25.7795	23.7611	21.7294	19.6922	15.4179	17.2865	15.4658	19.8029	18.6352	14.4757	5.33841
BnaA03g58390D	GSBRNA2G00036384001	chrA03_random:1661186-1665337	3188	20.7451	18.5043	15.2016	14.8776	6.79976	7.93248	15.1338	17.3485	19.0582	9.15822	3.9637
BnaA03g58450D	GSBRNA2G00003714001	chrA03_random:1686387-1689592	2391	3.5186	162.891	157.126	140.684	211.093	255.315	139.286	164.326	168	126.107	300.461
BnaA03g58460D	GSBRNA2G00023642001	chrA03_random:1696868-1700308	2527	0.822545	56.6731	57.4717	52.3303	84.8344	97.028	53.7805	58.8318	64.6115	50.1914	131.26
BnaA03g58750D	GSBRNA2G00067685001	chrA03_random:1884774-1885479	705	716.343	627.923	794.08	749.767	746.834	911.836	885.24	1054.77	624.313	991.169	257.537
BnaA03g59140D	GSBRNA2G00065297001	chrA03_random:2192474-2193317	843	297.795	331.478	252.712	209.502	62.6791	87.4198	183.801	261.187	269.525	61.0932	6.08747
BnaA03g59650D	GSBRNA2G00028596001	chrA03_random:3711565-3713635	1607	0.909756	59.7092	57.6909	53.9265	61.2582	78.9553	52.296	62.5212	71.9866	35.3101	88.5982
BnaA03g59850D	GSBRNA2G00028638001	chrA03_random:3998666-3999909	579	32.2014	17.6428	22.4643	17.3874	6.53131	8.69256	14.7211	22.9608	17.7244	14.1651	13.4117
BnaA03g59990D	GSBRNA2G00028674001	chrA03_random:4275087-4277419	1472	4.41586	4.28825	4.29842	4.1457	3.2451	4.12881	3.78958	4.36309	3.64535	3.31038	1.33081
BnaA03g60000D	GSBRNA2G00035030001	chrA03_random:4279723-4285483	2455	6.16995	5.00055	4.95005	5.073	3.21955	2.75543	2.63111	5.0485	4.37676	5.27626	0.433603
BnaA04g00410D	GSBRNA2G00149293001	chrA04:240976-243984	2121	44.4355	199.061	196.268	176.304	270.537	311.31	140.927	155.9	181.47	125.55	232.083
BnaA04g00440D	GSBRNA2G00149289001	chrA04:259516-262170	1505	17.8482	12.952	17.3636	17.2166	28.0797	15.5211	14.183	15.4075	16.6107	25.8	40.818
BnaA04g00630D	GSBRNA2G00149264001	chrA04:481474-483013	1539	15.8526	38.1534	41.7328	33.5396	60.9225	64.3219	39.8097	45.3141	46.093	37.1449	76.0648
BnaA04g00820D	GSBRNA2G00149240001	chrA04:559191-561018	1189	8.29939	7.04143	6.45122	7.32813	5.36055	3.21428	7.3353	6.96922	7.20792	5.28447	2.74588
BnaA04g01110D	GSBRNA2G00149204001	chrA04:724257-725519	810	62.8516	60.8204	54.401	61.6466	61.9147	42.5677	45.2369	52.5175	54.0053	40.103	28.2257
BnaA04g01730D	GSBRNA2G00149127001	chrA04:1114542-1121199	3519	22.0339	25.08	19.6863	20.7813	11.1837	15.0142	15.015	18.2611	21.1191	11.4338	7.05342
BnaA04g02200D	GSBRNA2G00149075001	chrA04:1424420-1427786	1321	20.1232	20.709	20.4655	21.0164	15.5293	13.3955	19.4459	23.6325	17.3528	14.1872	5.68243
BnaA04g02260D	GSBRNA2G00149065001	chrA04:1462057-1462243	186	85.0628	1036.42	711.62	747.062	1398.86	1648.41	827.896	1035.57	918.848	668.187	1517.34
BnaA04g02380D	GSBRNA2G00149049001	chrA04:1554740-1555034	294	3.97687	29.9412	34.0417	34.2756	21.4103	33.1995	26.6528	33.0193	33.1965	12.7909	36.4804
BnaA04g02430D	GSBRNA2G00149041001	chrA04:1587651-1589593	1202	4.60173	9.97229	12.5141	10.4474	12.6755	14.4914	9.75941	11.241	10.7782	7.97024	15.6751
BnaA04g02490D	GSBRNA2G00149035001	chrA04:1639069-1640462	1313	704.387	530.734	544.092	485.417	280.451	376.694	344.708	559.452	528.524	331.144	123.973
BnaA04g02500D	GSBRNA2G00126194001	chrA04:1646817-1647947	1130	211.506	209.296	167.323	139.566	75.4157	135.551	118.548	164.172	168.44	93.3771	23.2806
BnaA04g02760D	GSBRNA2G00126233001	chrA04:1845853-1847433	868	41.7253	60.4347	47.6883	60.9947	107.617	104.704	47.8471	57.1596	77.5637	82.7203	113.329
BnaA04g02800D	GSBRNA2G00126240001	chrA04:1875582-1876284	702	3.48615	16.0473	12.9662	26.8382	29.9315	22.4964	11.799	28.7963	35.0594	30.9546	12.459
BnaA04g02820D	GSBRNA2G00126242001	chrA04:1880940-1881948	779	18.6556	20.394	17.6503	16.0713	11.8543	5.49551	20.5727	19.5336	20.6955	8.54997	7.67246
BnaA04g03610D	GSBRNA2G00126366001	chrA04:2458405-2460621	1681	2.96522	158.582	152.134	141.803	210.468	223.33	137.042	174.516	169.072	120.068	293.055
BnaA04g03710D	GSBRNA2G00126378001	chrA04:2528355-2529688	1080	10.2569	12.3038	11.3123	9.71608	4.73222	5.96678	11.8987	12.6703	8.69672	5.50475	2.75449
BnaA04g03900D	GSBRNA2G00126410001	chrA04:2757930-2760248	1329	17.8012	22.3904	17.9127	15.0808	6.49524	13.097	11.1102	17.5035	16.1966	7.96976	1.44421
BnaA04g04400D	GSBRNA2G00126479001	chrA04:3251504-3254178	1532	59.6855	70.1002	57.3753	65.7339	115.253	175.096	57.3289	63.2272	85.8132	129.313	201.614
BnaA04g04420D	GSBRNA2G00126481001	chrA04:3262675-3264308	1266	61.8165	57.0634	62.3263	66.9205	71.1297	134.901	79.6967	79.9861	80.8247	99.4503	133.489
BnaA04g04550D	GSBRNA2G00126496001	chrA04:3350252-3352443	1944	16.8216	20.4141	23.9593	22.5433	26.1311	27.3976	23.883	27.3395	23.5067	24.017	34.8632
BnaA04g05160D	GSBRNA2G00126594001	chrA04:3852483-3855431	1653	38.3595	38.9439	35.7252	40.4307	31.1878	40.734	45.1308	44.3461	46.1099	44.6537	15.6038
BnaA04g05320D	GSBRNA2G00021776001	chrA04:4106721-4109488	1960	1.76763	73.7897	70.6856	53.6247	120.335	152.987	69.2938	70.8299	78.9913	49.7109	122.695
BnaA04g05380D	GSBRNA2G00021768001	chrA04:4132166-4133757	1591	91.7607	73.109	93.9962	81.7922	89.9608	110.137	108.984	104.055	82.7405	112.175	37.2378
BnaA04g05470D	GSBRNA2G00021754001	chrA04:4244816-4246287	1170	1.96906	4.14756	2.89095	6.75444	15.3914	12.2992	4.10577	5.35082	7.79457	13.2727	8.88868
BnaA04g05520D	GSBRNA2G00021747001	chrA04:4293408-4294221	732	6.58547	15.3744	16.7162	15.8141	18.9931	19.2217	16.8201	20.4981	16.0289	11.4612	25.5397
BnaA04g05850D	GSBRNA2G00021708001	chrA04:4501602-4502825	830	33.5815	30.6952	28.5228	34.081	49.726	50.6929	27.0094	30.0999	30.3997	58.4575	68.2285
BnaA04g05980D	GSBRNA2G00021689001	chrA04:4597915-4600108	1523	10.3522	5.84337	5.7512	11.5915	8.46154	5.72148	3.90505	4.88595	8.50437	6.83659	2.88468
BnaA04g06040D	GSBRNA2G00021681001	chrA04:4633418-4634381	963	2.78943	3.66979	4.02521	4.76269	11.2992	5.31412	4.13924	2.34586	3.9466	5.49926	15.1155
BnaA04g06350D	GSBRNA2G00111281001	chrA04:4898527-4899830	1057	2.54386	10.6821	4.54875	40.6073	36.4765	46.4121	14.3495	23.8138	3.51149	32.4379	52.193
BnaA04g06980D	GSBRNA2G00111182001	chrA04:5677116-5677875	759	46.8054	30.6485	28.1938	21.9783	8.79908	14.2987	14.3381	26.1441	24.9474	18.0734	1.85259
BnaA04g07520D	GSBRNA2G00114627001	chrA04:6452344-6454934	1368	28.5555	41.631	33.6031	47.318	82.5483	91.1072	30.0551	43.9397	61.1731	75.7969	47.1845
BnaA04g08040D	GSBRNA2G00114539001	chrA04:6995033-6999860	2888	3.83147	3.71253	3.91427	4.44847	4.09654	3.06819	2.61238	3.35531	3.96048	3.16966	1.66838
BnaA04g09420D	GSBRNA2G00114316001	chrA04:8424911-8427129	1377	142.182	140.931	146.434	155.886	250.391	262.204	156.377	173.494	182.305	235.068	329.841
BnaA04g09500D	GSBRNA2G00114305001	chrA04:8493665-8494265	600	7.80492	20.8238	18.0229	28.6217	30.1456	26.7544	25.5955	29.9996	30.1603	36.6062	18.3397
BnaA04g09570D	GSBRNA2G00114290001	chrA04:8574320-8575560	846	8.77186	11.0705	9.79041	11.5714	10.9577	6.64203	14.3986	9.02368	12.0246	8.2112	18.4248
BnaA04g09680D	GSBRNA2G00114273001	chrA04:8688664-8690223	1259	1.64191	3.77293	5.96449	3.89855	10.2797	17.9111	4.81893	5.20563	3.24053	3.65251	9.60497
BnaA04g09880D	GSBRNA2G00080535001	chrA04:8818647-8821293	1260	13.2228	17.4814	11.8632	11.7712	7.40544	10.2038	11.7091	16.1889	13.5534	10.8805	5.32462
BnaA04g10320D	GSBRNA2G00075080001	chrA04:9109517-9110963	1446	8.69708	7.65812	9.10359	6.51264	4.455	3.79902	8.28916	8.84827	7.25501	4.41696	2.09444
BnaA04g10460D	GSBRNA2G00075059001	chrA04:9171900-9173958	1181	0.50267	1.55277	1.77651	1.8324	2.09673	3.03302	1.95553	2.121	2.50628	1.94204	3.224
BnaA04g10500D	GSBRNA2G00075051001	chrA04:9234191-9237186	1951	6.09154	11.0543	9.50926	13.307	31.0235	60.3474	12.888	9.99114	23.8665	34.7896	63.2075
BnaA04g10600D	GSBRNA2G00007627001	chrA04:9308078-9311777	1768	20.2582	20.2899	21.4899	27.7651	28.9819	35.5823	36.6018	32.9466	34.5106	57.9247	29.7563
BnaA04g10650D	GSBRNA2G00007616001	chrA04:9350516-9352519	1617	4.49101	8.68033	7.38555	15.5797	45.4898	25.2731	5.67516	10.6635	17.1015	11.6793	3.7476
BnaA04g10950D	GSBRNA2G00068550001	chrA04:9513434-9514285	786	8.97658	7.68703	7.77969	7.1747	2.81576	4.77595	6.6368	7.40303	9.32809	4.91385	1.48842
BnaA04g11180D	GSBRNA2G00068521001	chrA04:9694944-9701129	3249	1.1659	2.41311	2.286	2.299	1.58796	3.35247	2.70528	1.7064	2.96787	3.53048	1.60306
BnaA04g11410D	GSBRNA2G00094012001	chrA04:9910378-9915274	2338	3.26597	2.73114	3.67693	3.01722	1.30641	2.39887	2.79556	2.43885	2.9171	2.33064	1.05274
BnaA04g11490D	GSBRNA2G00090342001	chrA04:9939473-9942138	1486	18.2981	14.5839	13.7105	12.1984	4.93333	7.94	8.56107	11.6135	12.1894	10.3657	1.18865
BnaA04g11700D	GSBRNA2G00090317001	chrA04:10073959-10076234	1312	2.94263	4.17139	3.5573	3.62479	2.37792	3.27546	3.37101	3.49615	3.43594	3.26469	0.726632
BnaA04g11770D	GSBRNA2G00090306001	chrA04:10113863-10116628	1933	2.68007	2.77019	2.63681	3.01549	2.73719	1.91686	2.36079	1.90218	2.66294	1.86401	0.797804
BnaA04g12240D	GSBRNA2G00090247001	chrA04:10419234-10422793	2475	1.26433	15.1086	11.9922	13.7544	22.8766	27.5228	14.7293	15.0962	13.7011	11.7495	26.8832
BnaA04g12570D	GSBRNA2G00090202001	chrA04:10604381-10606773	1238	45.661	47.9974	43.2932	43.1985	23.7594	26.5563	39.0674	45.7891	38.4081	31.2532	14.1753
BnaA04g12680D	GSBRNA2G00090185001	chrA04:10684810-10685677	630	0.142812	6.92395	8.14482	5.94049	13.9315	14.2138	6.77758	8.12418	5.81777	5.57123	16.2501
BnaA04g12770D	GSBRNA2G00032849001	chrA04:10768123-10773453	3398	11.1285	13.3824	12.5645	13.8805	12.5598	15.9923	17.2722	14.0132	15.4802	21.1852	21.5281
BnaA04g12920D	GSBRNA2G00032869001	chrA04:10900284-10900683	399	6.97836	6.19112	7.7145	12.4482	11.1393	13.9697	11.6789	10.5884	10.9329	15.0939	33.8244
BnaA04g12980D	GSBRNA2G00032880001	chrA04:10937416-10948679	8035	5.64625	5.24027	5.87752	4.93502	2.12182	4.39081	5.24357	4.51934	5.42568	3.79022	0.899067
BnaA04g13390D	GSBRNA2G00032942001	chrA04:11296727-11302393	4437	0.814316	0.755019	1.0401	0.70991	0.840552	0.880587	1.03699	0.686373	1.00701	0.921379	1.8234
BnaA04g13550D	GSBRNA2G00066979001	chrA04:11459430-11462069	2406	19.0449	12.7649	16.321	13.1809	10.5202	12.3584	16.9442	16.4423	12.4624	17.005	7.25072
BnaA04g13570D	GSBRNA2G00066984001	chrA04:11477606-11478734	915	15.8665	19.4957	18.1827	16.0384	31.3461	33.3556	14.2686	15.0949	19.5429	36.5342	35.5342
BnaA04g13840D	GSBRNA2G00068245001	chrA04:11689938-11693509	2565	5.14049	5.37226	4.32845	5.28025	3.02314	2.76755	5.78065	4.25897	5.10061	2.88668	1.79788
BnaA04g13950D	GSBRNA2G00068264001	chrA04:11809797-11811744	1478	1.04656	8.89688	11.0949	6.73595	38.2782	67.4229	12.6061	11.0249	7.97307	6.35926	15.4948
BnaA04g14230D	GSBRNA2G00083309001	chrA04:12028616-12031235	1827	4.17667	5.52625	4.93123	4.20801	2.44628	2.33466	3.817	3.78536	3.98504	2.77021	1.40409
BnaA04g14250D	GSBRNA2G00083311001	chrA04:12034462-12036954	1806	26.2674	22.5727	28.4554	26.088	42.0492	49.9344	25.7583	26.2684	27.3486	45.4736	55.5867
BnaA04g14490D	GSBRNA2G00082305001	chrA04:12173304-12174779	1030	6.30976	6.6731	6.14177	6.20637	2.95419	3.7693	5.93404	7.20881	5.16084	3.27693	2.23881
BnaA04g14770D	GSBRNA2G00058347001	chrA04:12410703-12412253	1288	10.2895	12.3863	11.3361	13.0778	17.2834	19.0708	10.9317	12.4839	15.7534	19.0895	19.3686
BnaA04g15310D	GSBRNA2G00058282001	chrA04:12724554-12726738	1360	7.99681	6.4567	6.8173	7.1644	5.73075	5.36798	6.11808	6.64154	6.75746	6.10456	3.30104
BnaA04g15380D	GSBRNA2G00058275001	chrA04:12759089-12761698	1949	9.09643	11.8703	10.9351	12.0625	20.1565	15.0453	13.6509	10.7115	10.7983	12.792	41.102
BnaA04g15520D	GSBRNA2G00089003001	chrA04:12867171-12873913	4580	3.91783	3.85602	3.84864	4.09765	5.21105	5.37573	4.16048	3.14467	4.2514	4.34873	10.6401
BnaA04g15600D	GSBRNA2G00089013001	chrA04:12903788-12904829	1041	15.2649	28.6628	29.7909	40.9639	93.9713	152.667	26.7033	42.3479	59.3208	91.1399	89.5267
BnaA04g16000D	GSBRNA2G00045254001	chrA04:13145684-13146625	708	7.56964	6.20765	6.01269	6.14097	2.42572	4.56883	9.64638	6.34843	6.89683	4.37234	2.02493
BnaA04g16150D	GSBRNA2G00045237001	chrA04:13213022-13214125	576	17.8627	14.1957	13.9959	14.3492	5.11524	7.0352	11.7834	16.0039	14.6623	5.33914	1.64676
BnaA04g16160D	GSBRNA2G00045236001	chrA04:13216686-13217500	580	19.4412	17.5734	15.6654	16.5657	10.1827	17.1275	14.6062	21.4764	14.5126	8.1483	2.77227
BnaA04g16260D	GSBRNA2G00045223001	chrA04:13273362-13275333	1547	5.97144	4.4002	4.96818	3.73792	1.99766	2.50007	5.79202	6.60062	4.68075	3.14631	1.96395
BnaA04g16530D	GSBRNA2G00050348001	chrA04:13510948-13515832	3280	1.28403	1.19614	1.53902	1.95676	1.21506	1.31262	1.7924	1.22792	2.13441	1.8152	2.73533
BnaA04g16900D	GSBRNA2G00050400001	chrA04:13783577-13787586	1798	7.13452	9.91323	7.6641	6.81736	6.31362	4.68962	7.85016	6.4754	5.82701	5.87588	3.14918
BnaA04g16920D	GSBRNA2G00050403001	chrA04:13798383-13802286	2669	2.80637	3.1055	2.38902	2.32491	1.52519	3.19791	1.85289	2.15385	3.04373	3.15782	0.313633
BnaA04g17070D	GSBRNA2G00050427001	chrA04:13912872-13917491	1735	64.8659	63.5693	55.4277	57.4383	23.0872	36.1958	46.0141	60.0753	47.8171	31.7619	7.26948
BnaA04g17080D	GSBRNA2G00050428001	chrA04:13920340-13922578	1833	24.0504	21.7724	19.0441	17.3994	10.7583	19.4262	17.4635	19.4473	20.1884	11.7058	4.61063
BnaA04g17100D	GSBRNA2G00050431001	chrA04:13949273-13951035	879	51.4362	42.2045	44.024	45.7834	105.489	103.598	64.2067	53.5319	48.734	121.45	117.295
BnaA04g17220D	GSBRNA2G00043485001	chrA04:14031031-14033477	1170	34.7085	38.6095	29.2088	27.4885	12.6998	17.9545	20.668	29.5069	26.879	16.4692	3.01069
BnaA04g17470D	GSBRNA2G00043448001	chrA04:14204210-14205527	1155	5.22896	6.20105	6.22603	6.82165	9.90379	12.2868	7.10053	8.17011	8.09405	8.83136	14.7306
BnaA04g17590D	GSBRNA2G00043432001	chrA04:14269925-14270894	969	0.475751	19.3253	13.6876	14.2003	23.1783	24.2706	18.062	19.0447	22.8816	10.1381	28.696
BnaA04g17620D	GSBRNA2G00043428001	chrA04:14277816-14280587	1648	1.05643	1.31948	0.948464	0.882795	1.62858	2.01457	1.15168	0.918342	1.43737	1.73909	4.73611
BnaA04g18040D	GSBRNA2G00006337001	chrA04:14536462-14537137	491	12.1968	19.1228	16.1187	23.2085	45.3518	53.0913	13.7125	20.9415	21.0482	39.4017	25.6528
BnaA04g18240D	GSBRNA2G00006359001	chrA04:14663071-14666035	1823	0.379141	11.6663	10.7575	9.77476	19.6897	25.7024	13.8929	12.7716	13.3983	10.9811	27.767
BnaA04g18330D	GSBRNA2G00006369001	chrA04:14689640-14690933	1061	7.65961	4.34502	6.95981	4.77916	2.87813	1.88143	4.31427	5.48867	3.83888	7.07899	2.65511
BnaA04g18610D	GSBRNA2G00006401001	chrA04:14808426-14811758	2544	0.131804	7.34237	6.20869	7.03318	12.2003	12.1639	7.52665	6.70336	6.67888	6.71855	14.2776
BnaA04g18980D	GSBRNA2G00006446001	chrA04:15097829-15099206	926	14.1962	16.2468	16.3699	15.8507	24.4551	17.255	15.4938	18.3702	13.5949	17.1079	27.8291
BnaA04g19010D	GSBRNA2G00006449001	chrA04:15107773-15109469	697	1.6776	2.53195	2.75794	3.23807	4.22025	2.20174	3.65924	2.41848	2.66773	3.2914	6.37511
BnaA04g19070D	GSBRNA2G00006457001	chrA04:15138133-15141593	2026	2.11172	2.87574	2.33154	2.88201	2.26083	1.16857	1.4262	1.4606	1.82644	0.580488	0.204986
BnaA04g19140D	GSBRNA2G00006466001	chrA04:15183800-15186805	1666	6.19221	4.42344	3.1707	4.18811	2.23062	2.28322	1.83593	2.91677	3.08738	2.30741	0.670826
BnaA04g19190D	GSBRNA2G00064653001	chrA04:15214682-15219085	3331	20.3074	18.2735	19.4985	18.6762	8.97647	13.6222	20.4083	19.9582	17.4456	15.5502	7.88033
BnaA04g19300D	GSBRNA2G00064640001	chrA04:15253966-15255956	1158	0.0651178	6.45715	7.0385	7.6637	9.78465	10.8381	7.49064	8.9008	8.80317	5.43929	12.646
BnaA04g19460D	GSBRNA2G00064623001	chrA04:15317986-15321550	2742	0.25627	7.59301	8.25351	7.19461	8.63685	11.5791	7.96544	8.73052	9.10346	4.94639	12.6836
BnaA04g19510D	GSBRNA2G00064617001	chrA04:15332947-15334064	800	0.696849	29.6316	27.831	31.0408	31.558	36.4242	27.7989	34.0992	34.4412	16.33	44.3428
BnaA04g19600D	GSBRNA2G00064608001	chrA04:15368332-15370330	1998	1.51088	4.2235	2.26588	4.90517	5.09643	6.69311	1.95581	3.0375	6.77917	6.77876	2.69504
BnaA04g19840D	GSBRNA2G00064576001	chrA04:15462652-15463366	628	7.90897	9.4459	9.56334	13.8858	9.75174	6.61205	9.39166	10.4931	13.1287	8.41918	15.5576
BnaA04g19880D	GSBRNA2G00064572001	chrA04:15470732-15471378	646	15.7303	13.3141	16.2056	12.7128	22.5006	19.4173	18.2718	18.8836	12.11	19.6789	35.6983
BnaA04g20020D	GSBRNA2G00064557001	chrA04:15529271-15531257	1986	116.201	98.2807	121.21	110.13	194.091	164.623	135.501	126.621	134.095	229.208	415.425
BnaA04g20050D	GSBRNA2G00077039001	chrA04:15544119-15546105	1986	85.0428	73.4285	94.6278	88.1108	172.933	142.801	115.306	106.602	100.842	212.391	430.189
BnaA04g20060D	GSBRNA2G00077038001	chrA04:15546324-15551071	2918	8.61474	8.52742	8.51038	7.77856	4.68147	6.98365	9.7122	7.81891	8.90903	7.13854	3.78305
BnaA04g20340D	GSBRNA2G00077003001	chrA04:15697498-15699770	1035	4.19376	108.763	97.9438	95.7757	166.041	173.574	102.175	109.666	117.112	75.7823	182.603
BnaA04g20350D	GSBRNA2G00077002001	chrA04:15702579-15704390	969	8.44818	7.53903	7.84922	9.88954	6.50056	4.00142	13.8283	8.21626	7.16507	7.37963	1.3758
BnaA04g20360D	GSBRNA2G00077001001	chrA04:15705732-15707918	969	3.05595	92.309	82.8077	79.63	115.646	117.106	72.9645	87.8972	93.609	56.5845	131.389
BnaA04g20380D	GSBRNA2G00076999001	chrA04:15709509-15711136	1108	3.8527	3.80483	4.14968	3.87816	3.29867	1.98509	6.68827	4.11227	3.36955	2.56438	0.659156
BnaA04g20580D	GSBRNA2G00069680001	chrA04:15814823-15818526	2310	7.24423	7.54681	6.71861	6.60322	4.18866	5.51009	6.69229	6.5821	6.59777	4.72091	1.8939
BnaA04g20720D	GSBRNA2G00069663001	chrA04:15904778-15908428	1485	2.45876	3.06804	3.72061	3.58784	6.50955	10.0448	2.59336	3.32178	3.36003	8.40693	8.12331
BnaA04g21240D	GSBRNA2G00005465001	chrA04:16186409-16187893	893	77.2843	67.1327	70.489	76.6077	55.5005	54.8507	88.54	75.7778	64.8889	103.106	21.5127
BnaA04g21260D	GSBRNA2G00005463001	chrA04:16198605-16201417	1299	2.23206	4.32405	4.41892	4.01824	4.41755	5.53049	4.53514	5.11943	4.44233	3.89431	6.31156
BnaA04g21420D	GSBRNA2G00005443001	chrA04:16329894-16333190	1595	11.0578	9.85316	10.4524	7.72811	4.15676	7.15449	5.86398	9.09779	10.8367	4.75977	2.21703
BnaA04g21820D	GSBRNA2G00005396001	chrA04:16555346-16557541	1087	16.8852	16.0808	14.8201	15.9144	10.0671	12.9309	14.4018	16.4891	13.9255	9.91945	6.45256
BnaA04g21960D	GSBRNA2G00005379001	chrA04:16651225-16652092	867	17.8629	15.7285	17.5252	14.0665	8.59991	8.4671	13.2622	12.0806	11.8122	6.76644	4.34606
BnaA04g22070D	GSBRNA2G00005367001	chrA04:16713201-16714313	834	24.0017	23.6501	23.6201	22.6582	85.301	36.7939	16.346	21.4896	12.925	28.0873	47.9881
BnaA04g22200D	GSBRNA2G00005354001	chrA04:16763649-16766348	1466	42.5054	35.3899	34.21	31.1417	26.8681	30.3754	34.8644	41.5731	38.7007	32.8577	19.3212
BnaA04g22430D	GSBRNA2G00123393001	chrA04:16914851-16917860	1878	9.87662	11.1182	9.92277	12.1448	19.6597	18.6334	10.612	10.6848	13.4874	21.0884	19.4997
BnaA04g22550D	GSBRNA2G00123378001	chrA04:16970783-16972751	1126	4.53673	3.76949	5.71142	4.69865	7.32447	5.9499	5.14229	5.66541	4.24564	9.16653	11.1608
BnaA04g22640D	GSBRNA2G00123369001	chrA04:17004613-17005280	667	14.0697	14.6229	13.4538	13.7317	12.4217	24.5443	32.6563	13.1609	19.1787	5.94988	3.73043
BnaA04g23070D	GSBRNA2G00123321001	chrA04:17196634-17199325	1278	0.388844	1.99648	2.50265	2.72549	4.02403	5.99259	2.42588	2.20198	3.03983	2.50469	8.33422
BnaA04g23210D	GSBRNA2G00123302001	chrA04:17265150-17269180	2817	7.42317	6.06282	7.07497	7.69865	1.78847	2.82265	4.14231	5.75173	6.54231	2.69842	2.6912
BnaA04g23260D	GSBRNA2G00123297001	chrA04:17345969-17350393	1749	10.8156	11.304	9.43441	8.2635	6.72122	9.40796	8.60463	7.4189	9.71291	9.74651	3.29072
BnaA04g23480D	GSBRNA2G00123273001	chrA04:17437094-17438999	1401	4.20036	7.87528	3.98048	4.85755	1.61243	3.83561	6.45948	5.21796	5.63133	4.59275	0.511412
BnaA04g23580D	GSBRNA2G00123261001	chrA04:17477747-17479573	1705	0.198136	14.5231	13.7327	12.986	16.3517	19.1001	13.8444	13.8787	18.8876	8.3936	22.9075
BnaA04g24000D	GSBRNA2G00123207001	chrA04:17686565-17691859	3311	2.78404	3.33533	3.17737	3.37987	4.31624	5.26404	5.36246	3.31495	3.94238	6.20501	9.84948
BnaA04g24070D	GSBRNA2G00123196001	chrA04:17725055-17726641	1125	13.7977	11.6739	11.3537	11.9799	23.4651	17.7381	11.1455	12.8157	12.2141	17.9942	29.6835
BnaA04g24080D	GSBRNA2G00123195001	chrA04:17732117-17733743	1285	41.3412	36.7762	37.2119	32.7702	16.7394	21.1291	34.71	35.4142	33.4417	20.5503	6.11228
BnaA04g24090D	GSBRNA2G00123194001	chrA04:17733813-17735277	1385	28.5709	24.5037	24.4741	26.2323	12.2042	14.6019	24.2856	28.5486	21.4882	12.7054	5.35445
BnaA04g24200D	GSBRNA2G00123181001	chrA04:17796499-17799652	2573	80.3653	46.9965	54.6931	43.8851	34.6661	41.8645	49.0223	51.0387	46.1562	50.2386	33.4751
BnaA04g24360D	GSBRNA2G00123164001	chrA04:17849850-17851372	1103	17.9478	26.292	17.4197	19.5362	11.9628	7.93826	13.9402	19.1573	18.3574	8.44312	6.83131
BnaA04g24790D	GSBRNA2G00045069001	chrA04:18040334-18042612	1722	2.09854	1.9297	1.76152	1.58524	0.969544	1.23314	1.3758	0.374482	0.441354	2.51578	0.186652
BnaA04g24900D	GSBRNA2G00045084001	chrA04:18111650-18114109	1617	0.587982	34.8357	27.3356	29.7581	47.1171	47.0486	29.6758	36.4703	40.4162	24.7823	58.1527
BnaA04g25040D	GSBRNA2G00045101001	chrA04:18170375-18171106	645	95.4815	65.4507	77.4667	59.3944	43.0368	43.3284	57.7698	72.4695	62.3901	54.4758	30.1706
BnaA04g25470D	GSBRNA2G00045150001	chrA04:18305172-18307660	956	544.187	512.131	475.711	361.537	337.7	470.606	438.596	496.791	393.38	534.012	170.295
BnaA04g26290D	GSBRNA2G00063260001	chrA04:18719372-18724151	3095	15.6658	14.4101	13.9692	10.865	7.27408	8.83762	11.3476	13.0821	12.0879	8.24257	3.67668
BnaA04g26440D	GSBRNA2G00063275001	chrA04:18770411-18771657	761	0.716252	9.51258	10.8413	10.6779	29.071	30.6515	12.1882	16.8701	10.516	9.23071	22.2481
BnaA04g26460D	GSBRNA2G00063277001	chrA04:18775130-18776802	786	7.47996	13.0719	10.9657	13.5586	29.3871	39.8279	14.7241	13.5137	20.5471	21.843	51.9084
BnaA04g26520D	GSBRNA2G00063283001	chrA04:18793082-18797332	3068	2.89697	3.66462	3.26799	3.19906	3.75292	4.34696	4.10017	3.21601	3.28177	5.46906	6.08944
BnaA04g26560D	GSBRNA2G00063287001	chrA04:18805105-18806845	1182	1272.52	1132.27	1093.52	886.744	655.826	835.452	983.109	1223.33	895.54	915.865	307.617
BnaA04g26890D	GSBRNA2G00088645001	chrA04:19011277-19012195	918	6.06679	302.402	234.17	263.415	370.557	421.358	258.633	318.259	361.115	207.019	506.088
BnaA04g27120D	GSBRNA2G00034270001	chrA04:19122951-19124358	1407	7.77599	9.23189	8.41494	9.86071	10.3341	6.05454	6.03624	5.73123	8.14121	5.57738	1.92403
BnaA04g27160D	GSBRNA2G00034274001	chrA04:19134952-19136796	1125	48.7832	46.2433	47.4964	46.9205	24.4486	39.8616	40.8139	43.915	41.633	36.2528	12.702
BnaA04g27260D	GSBRNA2G00053336001	chrA04_random:13561-14962	1401	0.732472	29.4161	40.3574	32.3402	33.3536	60.1963	32.0764	29.9552	36.4039	21.0292	85.9914
BnaA04g27560D	GSBRNA2G00034336001	chrA04_random:158321-159423	761	2.55426	6.3305	6.5718	14.06	18.4889	25.3592	5.58164	8.31269	20.7064	15.1874	12.0623
BnaA04g27680D	GSBRNA2G00042563001	chrA04_random:218842-220395	1111	0.944247	60.2031	55.7067	52.4039	83.422	90.8005	57.119	60.2704	53.6443	41.7027	100.2
BnaA04g27830D	GSBRNA2G00058712001	chrA04_random:369047-370737	1245	1.35104	2.17317	2.15373	2.47441	1.95182	3.00215	2.45764	2.39634	2.31468	1.30162	4.41087
BnaA04g27870D	GSBRNA2G00097650001	chrA04_random:403485-404968	679	32.6477	25.9781	28.3016	25.6809	26.103	34.6918	21.5042	33.356	22.96	22.6251	5.53188
BnaA04g28330D	GSBRNA2G00082616001	chrA04_random:761667-762301	459	77.1305	100.737	69.5497	77.1226	64.1427	63.7734	77.1332	96.1031	80.7639	99.8296	28.6977
BnaA04g28670D	GSBRNA2G00025422001	chrA04_random:930898-933843	1660	19.4195	16.8602	17.8794	19.428	17.4335	16.6998	16.4111	18.0792	18.2054	17.2629	8.34363
BnaA04g29360D	GSBRNA2G00008113001	chrA04_random:1342480-1344706	1547	6.90772	26.732	20.4817	21.9044	23.4603	27.4713	23.0351	23.8728	27.2755	13.0113	25.917
BnaA04g29490D	GSBRNA2G00016997001	chrA04_random:1397830-1399030	1031	15.5488	16.8321	14.9678	14.4803	22.073	18.139	21.9833	17.67	16.3214	18.6373	36.9219
BnaA04g29560D	GSBRNA2G00017007001	chrA04_random:1419468-1422404	1645	2.61401	3.38697	3.66648	3.08663	6.14576	2.40582	2.28796	1.55255	2.02511	2.76043	7.1709
BnaA04g29570D	GSBRNA2G00017008001	chrA04_random:1422837-1424102	805	37.8349	43.8745	35.0159	38.6171	31.9391	24.0878	37.8383	40.3935	41.504	27.3571	13.3487
BnaA04g29680D	GSBRNA2G00053353001	chrA04_random:1459717-1461937	2140	22.9161	43.537	47.5575	46.8877	58.2736	65.8071	38.2988	41.784	42.7578	44.8112	58.7436
BnaA05g00130D	GSBRNA2G00133051001	chrA05:79870-80296	426	36.7025	33.7757	33.5038	30.2755	41.3596	47.1349	28.8097	27.4979	24.7969	18.0214	8.89075
BnaA05g00310D	GSBRNA2G00133031001	chrA05:125175-130797	3293	2.00318	2.17774	1.68045	2.19094	1.64579	1.81	2.97644	2.07934	2.46989	2.15735	4.11218
BnaA05g00450D	GSBRNA2G00133013001	chrA05:212991-217563	3129	4.88838	5.58108	5.40308	4.69472	3.20652	3.17122	5.22322	5.07536	4.01221	3.8264	0.865248
BnaA05g00610D	GSBRNA2G00132993001	chrA05:285905-286214	309	73.0416	62.2737	63.7598	62.9459	33.3166	45.6247	59.6807	59.12	49.3219	47.3367	9.01922
BnaA05g00740D	GSBRNA2G00132977001	chrA05:409328-412724	2708	1.57968	1.14572	0.963145	1.00208	0.417495	0.416182	0.751076	1.29769	1.11592	0.387525	0.165951
BnaA05g00790D	GSBRNA2G00132970001	chrA05:463688-465813	1477	23.2926	24.2407	26.4962	30.7824	45.6162	46.8274	25.8267	27.1958	34.2753	50.986	61.8497
BnaA05g00800D	GSBRNA2G00132968001	chrA05:467360-468011	651	35.3205	313.942	305.626	271.909	355.897	372.794	257.86	322.52	354.498	231.593	436.915
BnaA05g00810D	GSBRNA2G00132966001	chrA05:471115-475305	3418	2.73876	171.206	180.513	149.909	219.501	256.429	158.058	180.684	195.557	119.715	292.389
BnaA05g01120D	GSBRNA2G00132927001	chrA05:632613-635615	1776	4.46891	5.11805	4.84772	5.16635	2.37963	4.00131	5.12226	5.55449	3.47118	3.73888	1.06555
BnaA05g01330D	GSBRNA2G00132901001	chrA05:798439-799903	1464	2.42508	3.14844	3.58891	5.11293	5.23367	4.34487	2.97475	2.59309	4.79276	3.29044	5.07942
BnaA05g01450D	GSBRNA2G00132887001	chrA05:843130-846310	1963	13.5977	13.262	13.2154	11.3993	6.51633	10.0819	12.7251	12.2187	11.793	8.07551	4.24699
BnaA05g01460D	GSBRNA2G00132885001	chrA05:851151-851834	600	0.718934	13.114	14.9803	13.2523	18.0427	22.687	13.1307	15.2652	15.9811	7.01289	24.1421
BnaA05g01480D	GSBRNA2G00132882001	chrA05:861481-862351	719	96.6159	68.7361	77.6098	78.5501	54.0293	68.7145	83.3612	84.9487	82.586	57.7912	27.0708
BnaA05g01610D	GSBRNA2G00132863001	chrA05:937117-938467	1209	0.548739	39.1937	38.6625	33.9983	49.0193	54.7833	38.8898	40.0772	42.9257	26.0386	62.7421
BnaA05g01650D	GSBRNA2G00132859001	chrA05:947977-948640	663	9.7685	7.75216	8.52536	8.25152	16.4246	14.591	8.75513	7.00319	8.53661	17.336	22.4418
BnaA05g01870D	GSBRNA2G00132831001	chrA05:1048380-1052006	1972	12.5274	10.3946	11.9478	9.35451	5.40593	8.65448	12.5779	9.44692	10.4221	8.21665	5.08802
BnaA05g01950D	GSBRNA2G00132823001	chrA05:1097232-1099475	1553	0.319097	8.91334	10.2511	8.7745	13.7963	14.5578	9.71898	10.7183	9.87101	6.43451	16.6695
BnaA05g01960D	GSBRNA2G00132822001	chrA05:1100363-1102886	1760	15.2965	13.9693	12.0831	10.2541	7.76523	8.48942	10.2309	11.646	11.1803	7.93762	3.05887
BnaA05g02000D	GSBRNA2G00132818001	chrA05:1119959-1123583	2266	11.2508	12.7266	11.0489	8.9763	5.87709	9.00612	10.0367	11.0639	9.14271	7.77994	3.61547
BnaA05g02180D	GSBRNA2G00132795001	chrA05:1236679-1237569	890	35.6649	36.9592	43.533	37.5039	55.8401	52.1531	49.4993	54.9175	47.3881	70.06	88.7695
BnaA05g02270D	GSBRNA2G00132785001	chrA05:1267258-1269523	1579	14.5312	16.3122	13.7363	12.201	7.21798	12.0797	11.2754	13.551	13.4183	7.80192	1.22144
BnaA05g02290D	GSBRNA2G00132783001	chrA05:1270206-1272410	1254	14.4735	20.1389	23.1231	21.6561	33.41	36.8725	23.253	25.3219	27.4854	25.8107	35.5699
BnaA05g02300D	GSBRNA2G00132782001	chrA05:1278019-1280077	1608	5.1531	8.13787	6.48914	9.06973	7.35589	14.7163	5.61739	11.1491	14.2575	7.80314	1.80278
BnaA05g02520D	GSBRNA2G00132757001	chrA05:1384992-1386814	916	1.54887	74.8055	60.1854	60.8717	103.136	122.975	53.4108	66.171	64.4755	50.7013	119.018
BnaA05g03020D	GSBRNA2G00132705001	chrA05:1629832-1633657	2513	12.5081	12.8952	12.6675	11.8335	5.80881	7.84323	12.0216	12.5465	12.2279	7.19639	5.38167
BnaA05g03270D	GSBRNA2G00132671001	chrA05:1832210-1833087	791	83.5592	72.3599	73.4689	68.6784	44.6604	49.7607	80.9999	84.0577	60.9026	48.7345	25.6494
BnaA05g03390D	GSBRNA2G00132655001	chrA05:1881275-1881889	511	24.5026	17.7949	15.9004	21.101	16.401	25.9408	34.9372	14.5492	30.9748	35.028	118.674
BnaA05g03420D	GSBRNA2G00132651001	chrA05:1888935-1890632	1028	12.3804	10.7312	12.7873	14.732	13.8519	13.0315	9.66891	5.10439	7.68583	14.8158	4.76966
BnaA05g03470D	GSBRNA2G00132641001	chrA05:1915514-1919273	2477	25.4776	24.0108	23.5448	21.6633	18.7848	20.8771	21.6602	24.8566	21.2017	19.6772	10.9249
BnaA05g03750D	GSBRNA2G00132609001	chrA05:2009528-2010844	483	21.9887	19.1942	18.8707	23.7183	12.4967	9.48275	16.7326	16.8999	23.2647	9.02078	5.08148
BnaA05g04210D	GSBRNA2G00116626001	chrA05:2274568-2276279	1512	9.47803	5.54828	8.32035	7.82059	10.5936	5.6103	7.57303	7.07521	6.25602	12.0728	17.814
BnaA05g04350D	GSBRNA2G00116645001	chrA05:2346458-2347761	949	13.2302	11.6388	12.2105	12.8659	12.2705	9.31387	9.04147	10.5043	12.7494	8.80093	5.02893
BnaA05g04510D	GSBRNA2G00116664001	chrA05:2411005-2415594	2555	4.02016	3.60514	3.71651	4.16378	3.20833	3.67662	3.04409	3.23621	4.39594	2.77088	1.38322
BnaA05g04540D	GSBRNA2G00116669001	chrA05:2429260-2430225	553	37.4369	26.1241	37.9394	37.9649	51.1859	37.5844	30.3913	36.7047	34.0855	52.684	86.7803
BnaA05g04600D	GSBRNA2G00116675001	chrA05:2454040-2457478	2343	3.79547	3.69875	3.43314	4.33614	2.69573	3.05901	2.10679	2.78806	3.46534	2.48903	1.22961
BnaA05g05020D	GSBRNA2G00116725001	chrA05:2637450-2638428	978	12.7756	10.232	10.9281	11.7801	8.03055	7.52878	12.127	12.222	8.68298	8.10072	3.05228
BnaA05g05390D	GSBRNA2G00116766001	chrA05:2779483-2781687	1672	8.14822	13.1136	9.405	7.46683	8.21513	7.49245	11.2247	9.68415	7.48352	6.04684	1.63175
BnaA05g05520D	GSBRNA2G00116780001	chrA05:2895786-2898975	2272	0.030318	3.50757	4.55352	3.17971	2.60891	4.23962	3.13932	4.84829	5.60483	1.85555	5.14019
BnaA05g05550D	GSBRNA2G00116783001	chrA05:2903352-2908788	2012	2.34284	22.8081	24.3972	21.6788	25.8772	30.3437	21.8424	25.0438	25.99	15.2437	30.8834
BnaA05g05600D	GSBRNA2G00116788001	chrA05:2930389-2931920	1096	19.533	17.4854	18.0755	18.1208	18.4023	18.9567	14.586	16.8147	18.1574	13.1967	7.83428
BnaA05g05700D	GSBRNA2G00116799001	chrA05:2977414-2979963	1422	5.90488	15.815	16.4605	13.8547	11.8519	16.4043	14.0833	18.3256	17.7244	8.59546	13.1505
BnaA05g05880D	GSBRNA2G00116823001	chrA05:3087488-3089961	1464	0.490033	0.606853	0.900962	0.680397	0.634091	0.601941	0.517432	1.11566	0.934558	0.714258	2.09321
BnaA05g05930D	GSBRNA2G00116830001	chrA05:3109881-3111970	1694	5.60902	8.29141	7.42881	7.97723	9.50455	16.6058	7.26494	7.86069	12.5604	10.5062	12.1217
BnaA05g06080D	GSBRNA2G00116851001	chrA05:3233728-3235603	1548	10.5752	11.7338	12.7857	13.9602	8.18751	9.31841	13.2148	14.1405	11.3169	9.26531	3.90929
BnaA05g06090D	GSBRNA2G00116853001	chrA05:3237007-3239407	2043	23.6724	28.2894	24.9932	23.3658	16.1364	22.8906	22.3881	26.8691	22.8087	20.8628	6.9538
BnaA05g06110D	GSBRNA2G00116855001	chrA05:3264275-3268577	1996	3.05556	3.70892	3.60132	3.54109	1.88471	1.37692	3.52148	3.49462	2.50512	1.29342	0.466471
BnaA05g06450D	GSBRNA2G00116898001	chrA05:3479611-3482656	1812	13.2927	9.81717	12.6625	12.6822	20.8123	23.4177	13.1538	11.0678	14.1503	25.1402	26.9377
BnaA05g06580D	GSBRNA2G00116913001	chrA05:3583500-3586306	1580	3.58308	4.22661	4.13433	5.05381	12.1851	5.55633	7.1789	5.3638	5.22218	6.95318	14.1644
BnaA05g06600D	GSBRNA2G00116915001	chrA05:3594776-3596527	1004	4.80173	5.07817	3.9099	4.01101	2.30645	2.9206	2.81224	3.94778	2.99475	2.39962	0.443506
BnaA05g06750D	GSBRNA2G00116932001	chrA05:3660651-3661394	743	0.78089	2.39211	0.912638	1.62763	3.31732	2.2631	6.22094	6.23933	1.27231	6.62648	12.2755
BnaA05g06830D	GSBRNA2G00116942001	chrA05:3710135-3714203	2113	3.46435	2.84	3.25004	4.10521	6.11631	3.82048	8.0133	4.63952	4.35652	5.74684	13.2974
BnaA05g06880D	GSBRNA2G00116948001	chrA05:3731717-3733979	1257	2.47462	3.33105	4.2567	3.17387	8.95795	2.76282	2.93385	2.41415	1.77513	3.60049	6.21471
BnaA05g07040D	GSBRNA2G00116965001	chrA05:3803813-3807012	1525	6.7752	8.9872	6.77254	7.42491	9.32425	4.58266	4.0489	5.22131	6.5196	6.44806	2.77706
BnaA05g07200D	GSBRNA2G00116988001	chrA05:3882394-3889427	4242	8.86214	10.5608	10.1774	12.611	5.5082	10.4386	8.70169	9.61974	9.07815	8.21389	1.63492
BnaA05g07300D	GSBRNA2G00117000001	chrA05:3932304-3933770	1187	8.31541	10.5082	5.71067	6.3871	11.6894	8.70528	7.11175	4.62999	5.49971	11.5168	19.2042
BnaA05g07580D	GSBRNA2G00117036001	chrA05:4120912-4122403	1368	46.4907	31.4507	33.9538	33.6521	23.8582	23.7851	21.7033	29.2553	29.5291	25.6341	14.6274
BnaA05g08250D	GSBRNA2G00117118001	chrA05:4548583-4551138	1512	26.6886	22.7422	28.2124	26.5166	17.51	24.9127	26.0807	21.3432	24.9085	17.5577	10.3564
BnaA05g08310D	GSBRNA2G00117126001	chrA05:4587941-4591572	2492	36.1396	31.1858	31.8624	26.9422	18.183	23.643	26.9191	24.7194	25.5898	25.897	8.80904
BnaA05g08730D	GSBRNA2G00050285001	chrA05:4834335-4836016	1483	2.64175	1.8452	2.03064	1.86948	1.65355	2.25164	1.83902	2.05547	2.41331	1.56874	0.647946
BnaA05g09010D	GSBRNA2G00050253001	chrA05:4953955-4954264	309	5044.32	4057.29	4953.95	4672.35	11984	9531.12	6635.04	6025.45	5718.64	12857.5	21325.2
BnaA05g09030D	GSBRNA2G00050251001	chrA05:4958948-4961816	1779	4.32702	6.37468	6.40597	8.56718	14.2899	26.3197	8.26943	7.75427	14.5307	13.0301	20.1352
BnaA05g09330D	GSBRNA2G00095334001	chrA05:5180911-5184160	1512	1.13004	1.63117	1.96918	1.95346	4.44613	1.42837	2.05633	1.03181	1.93124	1.92083	4.54359
BnaA05g09830D	GSBRNA2G00095271001	chrA05:5422849-5423730	656	15.0294	29.1589	15.5923	15.6173	13.2065	10.3035	42.7196	19.4868	19.1224	16.0147	28.1277
BnaA05g10140D	GSBRNA2G00095236001	chrA05:5541061-5542907	762	15.9337	13.7969	14.4993	13.1961	17.0817	8.48033	11.3212	13.1627	12.9105	8.74982	6.54015
BnaA05g10200D	GSBRNA2G00095230001	chrA05:5557795-5559364	1005	7.77028	7.87359	7.6586	7.36698	13.6682	4.18243	11.6193	7.062	6.53088	10.8024	21.3777
BnaA05g10330D	GSBRNA2G00095216001	chrA05:5622278-5623919	1536	2.99318	2.88404	2.64005	2.22913	2.16235	1.84253	2.6351	3.20248	2.14944	2.53563	0.858255
BnaA05g10500D	GSBRNA2G00095197001	chrA05:5743578-5747863	3040	0.553779	41.4541	48.0103	36.8811	66.0606	75.3136	45.3778	45.0315	47.8156	38.3827	93.4511
BnaA05g10680D	GSBRNA2G00095175001	chrA05:5831298-5834949	2511	4.40945	8.02132	8.03374	9.18664	23.0965	39.7918	8.3695	9.44921	15.1791	22.894	27.0355
BnaA05g10700D	GSBRNA2G00089162001	chrA05:5844993-5845756	510	9.5726	20.5699	17.7608	25.961	55.511	58.4884	16.8955	34.8908	29.4981	55.1465	38.4838
BnaA05g10730D	GSBRNA2G00089159001	chrA05:5850273-5856177	4520	13.8917	16.1028	14.3095	13.1873	7.05745	11.746	13.074	11.8683	12.7249	8.95098	2.50088
BnaA05g11020D	GSBRNA2G00074125001	chrA05:6140868-6151054	5987	12.6618	13.6381	11.8509	10.2171	5.73952	8.16158	11.8975	10.5314	11.3344	7.14303	4.61355
BnaA05g11910D	GSBRNA2G00048560001	chrA05:6765656-6766343	687	8.38976	5.56312	6.56047	8.99588	3.74412	1.74365	2.11192	6.73567	6.76724	3.16219	1.65702
BnaA05g11930D	GSBRNA2G00048557001	chrA05:6774398-6777447	1985	72.8502	44.8114	55.9341	45.1798	32.1397	28.4215	48.96	50.9972	41.2264	51.2859	20.1383
BnaA05g11980D	GSBRNA2G00048551001	chrA05:6808654-6812256	2923	3.62818	3.5495	3.53837	3.37787	2.53854	3.09871	3.48814	2.97388	3.3417	3.08242	1.58942
BnaA05g12100D	GSBRNA2G00048529001	chrA05:6930182-6932116	711	20.7034	15.6831	17.6581	15.3693	45.0102	48.4131	19.4915	20.228	14.4794	48.674	53.7679
BnaA05g12280D	GSBRNA2G00048498001	chrA05:7084229-7085964	1173	111.401	92.923	92.2462	74.4412	36.9934	42.9991	60.4549	90.6801	71.834	55.1651	10.9165
BnaA05g12290D	GSBRNA2G00048497001	chrA05:7091758-7093649	1089	87.5155	71.215	78.259	61.9095	40.2196	52.4128	61.4919	76.8184	60.3719	59.4345	14.7835
BnaA05g12320D	GSBRNA2G00048494001	chrA05:7113195-7114692	1497	6.18163	3.20011	3.92342	3.13925	3.22878	2.24824	2.78534	2.83175	2.23866	4.38848	2.37682
BnaA05g12340D	GSBRNA2G00048490001	chrA05:7131879-7136231	1394	0.70818	1.16434	1.59157	1.86797	3.39863	1.27618	1.39927	1.25769	1.56462	1.8581	3.72616
BnaA05g12490D	GSBRNA2G00082074001	chrA05:7224394-7226569	1596	38.4648	35.6611	41.9179	37.0742	23.4371	31.8535	39.1986	35.717	39.5048	27.7753	9.95005
BnaA05g12630D	GSBRNA2G00082051001	chrA05:7346325-7348118	789	213.31	200.249	160.384	127.702	73.2241	110.903	126.259	192.715	180.175	78.7125	14.1239
BnaA05g12950D	GSBRNA2G00066237001	chrA05:7623151-7625220	1317	18.7465	17.5991	19.8208	22.7487	17.1229	18.3561	23.6126	22.9767	18.6247	16.8907	6.73721
BnaA05g12980D	GSBRNA2G00066242001	chrA05:7658287-7663033	1703	2.47152	4.59241	5.12047	4.46213	9.71197	4.07287	2.36584	2.48931	2.45349	4.4153	8.01806
BnaA05g13030D	GSBRNA2G00066247001	chrA05:7682496-7687032	2904	2.9921	3.25231	2.91054	2.18707	2.20069	4.21194	2.63349	2.33658	3.03829	3.46419	0.686679
BnaA05g13790D	GSBRNA2G00125565001	chrA05:8365622-8367344	1013	4.06541	4.62768	5.00967	5.3351	6.44009	4.42719	5.29656	4.80652	5.27336	6.64034	12.2334
BnaA05g14020D	GSBRNA2G00125532001	chrA05:8546625-8547706	624	1.37537	65.9363	60.8074	59.5739	106.309	131.428	57.5777	73.939	68.6718	51.3321	143.6
BnaA05g14440D	GSBRNA2G00033288001	chrA05:8909360-8915806	3400	8.56596	8.94977	7.39567	6.52862	3.30902	6.59245	4.88379	5.92379	8.18832	4.57067	1.71058
BnaA05g14540D	GSBRNA2G00033305001	chrA05:8994373-8996696	1315	3.61378	7.37693	7.49519	7.29908	6.7917	7.67849	6.4858	7.62017	8.50388	4.68345	7.3077
BnaA05g14600D	GSBRNA2G00033315001	chrA05:9065111-9067805	2085	74.9605	84.0885	73.3913	85.2977	183.526	251.347	85.383	75.9501	113.12	168.674	321.898
BnaA05g15910D	GSBRNA2G00042880001	chrA05:10439957-10446175	3719	1.52058	1.73139	1.69348	1.68562	0.986378	1.22605	1.5192	1.31404	1.77316	1.25117	0.510346
BnaA05g16040D	GSBRNA2G00042901001	chrA05:10665326-10667143	1428	11.9904	11.3102	10.7456	8.52408	7.06785	9.79681	10.3052	10.8193	11.3428	12.6765	5.39243
BnaA05g16170D	GSBRNA2G00042919001	chrA05:10774153-10779061	2328	2.23088	2.98551	3.06381	3.89201	5.25431	3.42295	4.11366	1.96544	3.59083	3.70705	11.7378
BnaA05g16360D	GSBRNA2G00058611001	chrA05:11062718-11065605	1135	2.81137	8.4164	9.34322	6.64807	9.45894	11.07	6.02676	8.5078	9.29287	4.78247	9.21157
BnaA05g16430D	GSBRNA2G00058602001	chrA05:11130038-11131679	1096	15.4227	13.3142	13.6666	21.414	14.5556	8.81764	31.608	22.8173	15.9024	18.3426	6.94446
BnaA05g16450D	GSBRNA2G00058597001	chrA05:11157354-11161661	2764	20.9959	18.946	18.7927	17.5838	12.0492	16.1506	18.4438	18.5421	18.6853	12.989	6.98919
BnaA05g16680D	GSBRNA2G00048476001	chrA05:11341559-11342921	695	26.7021	26.3961	22.6222	23.0071	16.1161	14.1286	21.3824	24.7316	21.6786	15.799	10.6575
BnaA05g16820D	GSBRNA2G00048448001	chrA05:11527976-11531021	3045	0.21456	0.092323	0.0845702	0.20242	0.598982	0.634572	0.154231	0.163367	0.150108	0.358231	1.05793
BnaA05g16950D	GSBRNA2G00048429001	chrA05:11738028-11740890	1495	0.861202	34.031	34.5646	31.1507	48.9163	55.7658	27.5174	33.8793	37.0171	27.4517	67.6158
BnaA05g17210D	GSBRNA2G00048385001	chrA05:11925153-11927820	1809	24.7423	22.0197	21.2503	18.7981	16.875	18.1711	22.0927	22.7257	20.5341	17.3496	11.3253
BnaA05g17300D	GSBRNA2G00048370001	chrA05:12037188-12040366	1458	21.9518	33.1093	32.743	32.3287	34.3548	39.6709	31.0033	34.1961	35.9271	29.4942	42.8861
BnaA05g18100D	GSBRNA2G00036606001	chrA05:13343106-13347704	752	101.953	109.729	97.0091	94.6115	80.2234	62.3826	88.3519	112.976	87.3845	87.6931	36.0862
BnaA05g18320D	GSBRNA2G00040246001	chrA05:13631826-13633429	1337	34.6772	30.6004	32.6266	28.844	23.0637	30.1516	26.5585	32.7625	31.8279	26.4315	15.4369
BnaA05g18490D	GSBRNA2G00040218001	chrA05:13847409-13850934	3361	13.1296	9.09842	10.2672	9.0822	4.95301	7.52688	10.5242	8.76408	8.42063	7.03876	2.13842
BnaA05g18570D	GSBRNA2G00077370001	chrA05:13937174-13940024	2004	0.789763	2.37696	2.378	2.08952	4.26691	5.19148	2.4602	2.50694	2.6674	3.08954	5.6445
BnaA05g18690D	GSBRNA2G00029549001	chrA05:14183930-14185850	1441	21.4385	32.5808	17.033	17.7855	18.3821	11.8397	31.1691	21.5208	25.3211	11.6756	2.44444
BnaA05g18860D	GSBRNA2G00029528001	chrA05:14273815-14274169	354	3.79503	119.755	119.187	112.134	208.533	235.274	123.802	150.942	145.408	93.6852	269.69
BnaA05g19210D	GSBRNA2G00029484001	chrA05:14506315-14509076	1783	2.0497	6.82073	6.95554	7.81403	10.5791	13.0033	6.83442	9.03941	11.184	8.80503	9.25196
BnaA05g19230D	GSBRNA2G00029481001	chrA05:14524862-14533915	5395	3.66199	4.05525	4.57643	4.63214	2.59658	3.03462	5.11345	4.17728	3.61186	3.30877	1.40964
BnaA05g19250D	GSBRNA2G00029479001	chrA05:14543798-14546107	1806	10.4872	15.0637	9.61035	7.56151	4.90929	8.88555	8.95253	8.57711	9.08692	8.14159	4.56237
BnaA05g19400D	GSBRNA2G00066356001	chrA05:14792148-14793248	871	44.3063	35.0562	37.1493	24.2126	13.2301	12.6338	26.4417	35.2778	26.0302	22.5446	7.96467
BnaA05g19550D	GSBRNA2G00066331001	chrA05:14904810-14906750	1136	54.2833	51.5692	52.9442	49.6866	39.218	48.3507	45.0857	54.2093	47.1929	53.3588	14.1387
BnaA05g19630D	GSBRNA2G00066320001	chrA05:15023467-15025103	1636	6.95635	7.53111	8.03911	6.36461	15.1886	4.66147	4.93848	3.6086	4.73587	8.24524	13.0112
BnaA05g19640D	GSBRNA2G00066316001	chrA05:15036319-15037059	740	22.8337	15.2677	19.5752	26.2508	15.2217	12.2362	33.8181	24.5549	21.2792	16.6768	6.01513
BnaA05g19720D	GSBRNA2G00066304001	chrA05:15096995-15099069	1490	203.463	203.324	178.5	194.424	109.222	119.199	163.274	219.375	170.977	147.521	44.6678
BnaA05g19760D	GSBRNA2G00009220001	chrA05:15165235-15168320	1864	12.6476	10.8925	10.235	10.1677	8.96185	8.61326	11.4531	9.68777	8.88282	8.09058	5.08182
BnaA05g19820D	GSBRNA2G00009231001	chrA05:15246117-15249389	1985	0.873021	4.99421	6.2467	4.71021	6.38189	9.10021	5.53664	6.96595	7.55852	3.7782	8.45169
BnaA05g19830D	GSBRNA2G00009233001	chrA05:15250119-15256239	3499	0.163142	1.19947	2.17999	1.32958	1.92018	3.10927	1.55782	1.62876	2.25131	0.974545	1.98554
BnaA05g20100D	GSBRNA2G00009267001	chrA05:15559974-15562212	1529	17.1818	14.6185	15.53	20.2709	25.6729	34.058	37.5355	15.8474	21.2955	8.72483	4.301
BnaA05g20240D	GSBRNA2G00009284001	chrA05:15644137-15644862	641	15.7571	18.5541	27.61	26.9937	49.5626	18.223	17.5768	25.405	26.5316	23.276	32.9453
BnaA05g20800D	GSBRNA2G00154057001	chrA05:16150716-16153420	2253	6.54089	7.81578	7.64053	7.07349	3.06193	3.56752	5.55006	7.48812	6.01575	4.76834	2.56032
BnaA05g20840D	GSBRNA2G00154052001	chrA05:16175496-16177949	1442	0.536118	22.6903	24.2253	19.2068	31.9436	44.4809	21.2863	25.4033	28.8714	12.851	39.1739
BnaA05g20960D	GSBRNA2G00154039001	chrA05:16258725-16261112	2271	18.1222	19.697	19.8749	21.7288	32.6867	39.1952	20.1869	20.1019	25.4149	28.9276	37.7987
BnaA05g21020D	GSBRNA2G00154032001	chrA05:16299490-16300298	531	6.07919	5.55402	6.31761	7.45695	12.8765	13.6271	5.48585	7.62658	9.16814	12.7485	15.1861
BnaA05g21450D	GSBRNA2G00153982001	chrA05:16548086-16549445	1320	10.1794	13.9969	8.96902	13.2166	9.21512	14.1472	9.15081	13.7096	13.8034	11.2575	4.66293
BnaA05g22270D	GSBRNA2G00153882001	chrA05:17024725-17030088	2690	4.51835	35.2389	32.4955	28.6422	46.1089	49.1529	27.9409	35.1809	36.2977	25.489	56.4148
BnaA05g22400D	GSBRNA2G00153868001	chrA05:17088124-17090542	2145	1.55333	2.47151	2.39392	2.6535	3.80718	1.44638	3.71993	1.8622	2.96491	3.07585	3.96842
BnaA05g22470D	GSBRNA2G00153859001	chrA05:17125267-17126691	693	33.2839	35.8567	35.1643	39.7279	76.7848	98.0681	34.1034	39.5879	46.055	73.4978	117.766
BnaA05g22600D	GSBRNA2G00153846001	chrA05:17177954-17180112	966	0.537398	3.29312	5.01942	3.82258	5.59115	6.67017	3.96213	4.83562	5.10487	2.34647	6.84099
BnaA05g22710D	GSBRNA2G00153833001	chrA05:17234252-17238108	1784	0.590039	10.977	11.8589	10.2654	13.4282	16.3896	9.89701	10.2849	12.0251	7.703	20.2458
BnaA05g22760D	GSBRNA2G00153828001	chrA05:17264519-17267315	2404	23.3934	19.6187	20.4404	19.2328	15.7349	24.5661	17.0192	19.6347	17.4955	16.4255	10.7447
BnaA05g22940D	GSBRNA2G00153804001	chrA05:17422162-17423663	1064	0.459513	13.0397	16.1601	10.3697	29.1104	34.7365	12.1727	13.2041	13.8141	9.57482	29.4379
BnaA05g22990D	GSBRNA2G00153797001	chrA05:17452571-17459296	2755	15.8387	14.14	14.8921	13.7956	23.5522	25.5362	15.5114	10.657	12.9845	26.9511	36.2033
BnaA05g23020D	GSBRNA2G00153794001	chrA05:17468323-17470976	2011	9.21392	14.345	11.4319	13.5336	18.3775	19.5308	16.3183	14.8342	14.5445	18.3147	26.5745
BnaA05g23080D	GSBRNA2G00153787001	chrA05:17503994-17507803	2224	6.79357	6.78768	6.35015	7.03635	6.76387	4.77843	3.16752	3.78456	5.24164	3.66234	1.85615
BnaA05g23160D	GSBRNA2G00153777001	chrA05:17559583-17560729	1146	5.13304	6.6234	7.95267	10.3422	15.6478	14.7234	8.44447	11.8028	10.4813	15.5809	11.8626
BnaA05g23180D	GSBRNA2G00153775001	chrA05:17568270-17569555	734	0.115636	3.38593	3.35248	2.35736	3.37506	6.72604	2.33588	4.88233	4.20427	1.3473	2.86624
BnaA05g23260D	GSBRNA2G00153765001	chrA05:17600951-17601335	384	24.3144	21.7131	25.7165	24.5223	13.7896	17.1945	22.3707	22.505	28.3764	9.55511	6.66146
BnaA05g23300D	GSBRNA2G00153761001	chrA05:17617659-17619557	1287	12.7047	13.9225	10.4666	8.20019	6.0081	6.48433	7.08128	9.93655	9.60102	6.87422	2.30966
BnaA05g23330D	GSBRNA2G00153754001	chrA05:17644918-17649313	2207	1.10946	1.06445	1.20601	1.52635	2.64959	2.6485	1.84269	2.01683	1.24966	4.72207	8.6548
BnaA05g23420D	GSBRNA2G00104993001	chrA05:17736128-17736851	723	30.0569	22.9115	30.8205	28.017	25.5713	22.4757	32.5243	31.6717	27.3494	23.54	12.0935
BnaA05g23460D	GSBRNA2G00104989001	chrA05:17750142-17751914	1015	852.203	588.793	620.663	470.805	308.324	426.781	467.581	576.449	469.096	383.746	43.8442
BnaA05g23620D	GSBRNA2G00104972001	chrA05:17818285-17822812	2766	1.25928	1.95441	2.23781	2.05862	2.87399	3.62899	2.06266	2.02679	2.0156	1.94211	2.69257
BnaA05g23860D	GSBRNA2G00104941001	chrA05:17980892-17981752	772	1.6814	1.56533	2.048	2.8708	6.45192	5.61621	5.54475	4.27127	4.44335	5.96605	9.08461
BnaA05g23920D	GSBRNA2G00104932001	chrA05:18006931-18016036	2302	9.99864	8.68672	9.84611	9.6182	14.4086	12.3099	8.8594	10.3114	9.42018	16.5566	21.8006
BnaA05g24000D	GSBRNA2G00104918001	chrA05:18061975-18062553	578	6.72177	6.70974	7.39785	9.2131	16.4282	14.8772	4.49333	7.2296	10.7193	16.4193	22.0905
BnaA05g24160D	GSBRNA2G00104898001	chrA05:18167608-18168687	756	23.0184	25.7335	19.6986	27.4124	48.5357	81.7033	19.4441	26.3151	30.9887	60.7111	47.5137
BnaA05g24200D	GSBRNA2G00104894001	chrA05:18177870-18178669	586	233.66	241.939	217.452	188.697	110.895	105.628	171.753	246.257	246.216	104.539	68.418
BnaA05g24300D	GSBRNA2G00104881001	chrA05:18211839-18214211	1845	11.6868	10.5307	10.6698	10.9537	7.0644	8.85595	8.1145	11.4324	10.4002	6.95134	1.71131
BnaA05g24610D	GSBRNA2G00104838001	chrA05:18363084-18368202	2657	3.23586	3.91377	1.71763	1.50992	0.371677	1.27691	1.66282	2.45996	2.29211	0.865452	0.156635
BnaA05g24630D	GSBRNA2G00104836001	chrA05:18376313-18378125	1812	7.0716	6.69264	7.53944	6.57052	8.19487	4.78059	4.0206	4.53872	6.24326	3.63472	3.21409
BnaA05g24830D	GSBRNA2G00104813001	chrA05:18502207-18504741	1951	4.92017	6.33816	6.45892	7.57328	12.4693	19.5224	5.60065	7.93626	11.0673	12.7566	12.1763
BnaA05g24870D	GSBRNA2G00104809001	chrA05:18514074-18516225	1724	4.87634	7.22564	3.89118	5.71203	6.90252	8.8365	4.91327	4.36968	5.08012	6.83735	10.5419
BnaA05g24930D	GSBRNA2G00104803001	chrA05:18534257-18535894	865	24.168	26.5851	25.8595	29.3018	50.0346	54.7241	25.3265	32.748	25.9012	52.5694	61.4514
BnaA05g25030D	GSBRNA2G00104791001	chrA05:18611262-18613467	2205	11.2118	16.5037	16.5721	19.2246	19.2129	16.5594	13.8638	20.0206	15.7918	18.9318	4.72812
BnaA05g25120D	GSBRNA2G00104781001	chrA05:18660345-18665039	2700	13.7251	12.9072	12.8008	14.017	20.2744	22.9253	12.3122	12.4474	15.4212	20.3844	25.825
BnaA05g25240D	GSBRNA2G00104767001	chrA05:18719134-18721165	1429	19.8069	25.7047	10.848	11.4663	5.02039	6.66281	7.91484	19.3533	19.7121	4.88397	0.664574
BnaA05g25380D	GSBRNA2G00104752001	chrA05:18790597-18792526	1929	2.65879	4.91836	5.92236	4.8668	4.71791	5.47846	5.50771	6.07189	5.36481	4.14763	7.32511
BnaA05g25570D	GSBRNA2G00104729001	chrA05:18890547-18892392	1845	1.31404	1.73893	1.2168	1.46341	2.23991	1.53844	1.8402	1.34708	1.92249	2.04268	3.55149
BnaA05g25600D	GSBRNA2G00104726001	chrA05:18912000-18915121	1938	6.24196	8.61462	4.94381	7.34184	6.32965	11.6531	20.1178	9.70313	15.9323	20.2258	13.9973
BnaA05g25890D	GSBRNA2G00079391001	chrA05:19066481-19069161	1947	4.92643	298.387	295.916	255.896	385.321	401.465	248.282	305.896	332.664	205.865	518.319
BnaA05g25900D	GSBRNA2G00079392001	chrA05:19072075-19074317	1995	3.01579	112.813	132.663	84.7151	208.293	247.234	106.006	126.102	113.437	91.2227	235.707
BnaA05g25910D	GSBRNA2G00079393001	chrA05:19074404-19078352	3948	3.73086	2.89306	3.88211	2.68678	1.64078	1.79858	2.24221	2.76429	2.80243	2.12148	1.52054
BnaA05g26120D	GSBRNA2G00079422001	chrA05:19201968-19202401	433	7.65669	13.1052	14.0189	8.98385	19.3227	5.27074	16.1251	9.04937	10.5444	8.10289	20.9112
BnaA05g26420D	GSBRNA2G00000160001	chrA05:19369353-19370486	1062	26.7126	29.8399	24.5161	24.6745	30.9116	20.0043	21.0263	26.3515	23.3697	20.0742	6.78434
BnaA05g26490D	GSBRNA2G00000167001	chrA05:19394218-19396152	1329	1.01783	30.1665	33.7138	22.375	63.2545	80.1972	30.5983	39.3041	34.2328	28.0827	61.6408
BnaA05g26770D	GSBRNA2G00000202001	chrA05:19483652-19486324	1907	5.24497	5.11153	4.64052	5.04304	5.04444	3.80658	2.21628	3.10392	3.56372	2.55953	1.24658
BnaA05g27100D	GSBRNA2G00000242001	chrA05:19605217-19617365	5795	3.04479	2.87462	3.28068	3.42211	2.65224	2.62166	2.10475	2.14383	3.05762	2.33431	1.06695
BnaA05g27230D	GSBRNA2G00000257001	chrA05:19679598-19681985	1319	0.0558525	2.2039	2.71987	2.54005	3.91898	4.33237	2.50212	2.99111	2.84348	2.16219	5.16022
BnaA05g27280D	GSBRNA2G00000263001	chrA05:19700443-19702059	1256	3.55175	4.93425	4.54474	5.91989	10.2449	13.0335	3.87203	5.46657	5.98898	10.7447	10.7474
BnaA05g27390D	GSBRNA2G00000276001	chrA05:19733641-19734402	761	0.807894	32.7621	31.7566	28.5175	50.3321	57.4443	33.9066	39.0521	38.2904	26.729	57.7002
BnaA05g27460D	GSBRNA2G00000284001	chrA05:19781712-19782278	566	23.5963	18.2757	24.1537	19.718	28.611	32.9121	21.6957	25.1281	20.0134	38.9355	57.1756
BnaA05g27860D	GSBRNA2G00000332001	chrA05:19974304-19975107	803	32.2946	33.8815	30.0256	30.4333	27.7737	36.2039	23.2195	32.6061	34.8977	17.5376	10.6988
BnaA05g27950D	GSBRNA2G00000342001	chrA05:20001793-20003374	1081	104.051	93.0291	107.395	90.4855	185.128	167.846	98.1048	144.548	105.333	202.071	201.008
BnaA05g28100D	GSBRNA2G00000363001	chrA05:20061660-20063795	1134	4.38897	5.35415	4.42195	5.16459	5.54691	6.21156	4.88644	4.86565	6.26062	5.72409	9.17954
BnaA05g28470D	GSBRNA2G00000405001	chrA05:20209746-20213376	2313	135.613	101.967	112.509	84.4456	76.7934	79.7649	89.9683	89.9479	80.9594	100.179	55.7487
BnaA05g28580D	GSBRNA2G00014340001	chrA05:20270335-20272529	1938	61.45	107.38	95.2453	141.088	156.357	177.27	86.987	129.232	156.899	173.112	55.5258
BnaA05g28870D	GSBRNA2G00080698001	chrA05:20369399-20372057	1647	14.8336	11.0494	14.8427	10.6038	6.83435	5.07847	8.82276	11.777	9.36635	14.5896	5.78058
BnaA05g29350D	GSBRNA2G00080647001	chrA05:20532583-20535079	1887	19.136	8.85223	14.9166	13.7114	22.3868	10.3872	10.6302	11.3688	11.5196	19.2895	38.3396
BnaA05g29710D	GSBRNA2G00059537001	chrA05:20661723-20663477	1290	16.4755	10.9304	14.2201	24.936	20.9129	12.2834	34.5858	14.4725	32.8679	23.3234	53.5631
BnaA05g29800D	GSBRNA2G00059528001	chrA05:20690344-20692060	1194	8.09944	13.8462	15.4022	14.09	14.1351	15.0828	14.6176	16.0843	16.278	10.7965	16.9657
BnaA05g29810D	GSBRNA2G00059526001	chrA05:20745640-20747751	1754	2.06775	0.659827	4.80272	0.813576	1.90498	5.56202	0.968924	1.28717	0.314791	0.559302	0.496871
BnaA05g30530D	GSBRNA2G00027031001	chrA05:21082552-21086671	1646	32.6132	31.7992	37.0577	34.3406	25.2374	37.7227	51.7815	41.4182	33.924	30.1415	14.9661
BnaA05g30760D	GSBRNA2G00027055001	chrA05:21243642-21249103	2815	4.18161	4.03812	3.69464	3.33065	2.61796	3.11328	4.51751	3.79444	4.05332	2.76383	1.38747
BnaA05g30840D	GSBRNA2G00027066001	chrA05:21296712-21307970	6793	4.71052	4.99034	5.08584	5.64307	3.20515	3.75074	3.78424	3.81301	4.94964	3.11473	2.0059
BnaA05g30860D	GSBRNA2G00027068001	chrA05:21313294-21316964	2126	12.4037	16.6194	14.6362	16.0616	20.5573	26.3043	16.8816	15.9942	22.4392	23.6422	32.8237
BnaA05g30880D	GSBRNA2G00027071001	chrA05:21343616-21346299	1422	2.60633	8.31055	10.2128	6.26576	11.7636	14.9519	7.29287	10.592	8.72977	4.89886	8.3585
BnaA05g31120D	GSBRNA2G00027101001	chrA05:21521572-21524114	2500	7.48541	5.28687	5.75885	5.6131	4.44891	4.05477	5.70375	5.38416	4.99173	4.1291	2.92964
BnaA05g31150D	GSBRNA2G00027105001	chrA05:21533903-21535368	1128	107.074	108.495	107.137	97.2601	43.9537	62.0145	98.283	102.563	104.653	57.7996	34.9147
BnaA05g31200D	GSBRNA2G00038506001	chrA05:21554149-21557273	2053	81.4625	67.9453	75.7308	70.8862	41.9688	57.4485	64.6761	72.0664	66.269	53.7541	26.705
BnaA05g31420D	GSBRNA2G00038532001	chrA05:21642042-21644191	1607	7.24679	6.16577	7.23393	7.2349	3.52808	4.7598	9.37111	6.93592	7.82884	3.87521	2.58222
BnaA05g31630D	GSBRNA2G00038558001	chrA05:21797000-21798866	1570	7.5153	7.90327	9.08299	9.36658	13.685	14.6049	8.7073	8.84791	9.40852	15.4789	15.082
BnaA05g31720D	GSBRNA2G00038568001	chrA05:21872670-21874177	1013	2.01059	5.89178	3.38891	6.56912	18.7575	24.9616	2.98388	5.6317	9.16829	10.3412	11.676
BnaA05g31930D	GSBRNA2G00038590001	chrA05:21945185-21946465	701	43.4808	36.4228	40.7208	42.1273	59.2619	43.3251	40.9262	45.8493	41.6198	53.9885	90.4238
BnaA05g32260D	GSBRNA2G00076135001	chrA05:22116463-22119224	1731	0.76666	9.93427	10.4331	8.32891	15.537	20.6353	10.0926	10.6828	11.3233	8.84498	19.8719
BnaA05g32340D	GSBRNA2G00076127001	chrA05:22135673-22138998	1874	1.18948	7.82258	7.65269	6.88509	8.81843	13.2649	7.5681	8.39438	9.33876	5.97321	14.0955
BnaA05g32500D	GSBRNA2G00076108001	chrA05:22296952-22298086	666	15.9784	17.8436	15.3695	14.4366	13.6405	10.4949	12.7523	11.5229	12.9683	11.1227	4.42607
BnaA05g33110D	GSBRNA2G00092887001	chrA05:22539611-22543516	1722	2.0542	2.89375	4.45142	4.00934	9.61982	2.57555	2.62632	1.74879	2.59336	2.55932	5.69512
BnaA05g33180D	GSBRNA2G00092894001	chrA05:22563638-22566046	2267	5.76787	5.53505	5.11309	3.4739	3.86062	3.95403	5.1536	4.00823	3.88932	4.79106	1.98529
BnaA05g33280D	GSBRNA2G00003630001	chrA05:22598553-22602541	2490	0.126261	6.55436	7.31502	5.66577	8.03665	9.72638	6.3477	7.7035	7.63092	4.43314	10.1947
BnaA05g33400D	GSBRNA2G00003644001	chrA05:22634005-22635601	1542	1.20981	1.53136	1.72378	1.7177	2.64561	4.40364	2.20097	1.52464	1.88853	3.83938	7.00268
BnaA05g33490D	GSBRNA2G00022316001	chrA05:22673064-22676351	1812	18.6817	20.5336	23.8983	24.2303	45.7102	64.6377	27.1791	24.1695	27.7027	50.4594	84.8082
BnaA05g33510D	GSBRNA2G00022314001	chrA05:22681695-22683042	1347	83.2236	135.24	144.711	132.027	180.684	226.74	131.881	163.579	157.426	147.15	227.93
BnaA05g33520D	GSBRNA2G00022313001	chrA05:22683170-22684173	406	102.816	187.439	208.292	172.756	155.926	210.83	180.006	211.186	233.365	156.327	230.328
BnaA05g33680D	GSBRNA2G00064118001	chrA05:22736815-22737232	417	12.8044	585.547	562.926	470.383	1207.26	992.061	545.687	672.489	602.042	563.012	1152.17
BnaA05g33710D	GSBRNA2G00064121001	chrA05:22740668-22744023	2510	1.4859	1.94324	1.81311	2.21422	3.07905	1.23061	1.60482	1.23388	1.37776	0.983564	0.127166
BnaA05g33720D	GSBRNA2G00064122001	chrA05:22746184-22749460	2773	2.10779	3.2787	2.27116	2.7198	2.50888	1.23132	2.30504	2.12345	2.08011	1.34884	0.155686
BnaA05g33740D	GSBRNA2G00064124001	chrA05:22795676-22798893	1763	4.96763	3.68512	3.99837	3.71354	2.8552	3.16521	3.62016	3.78767	4.35809	4.17803	1.68585
BnaA05g33760D	GSBRNA2G00064126001	chrA05:22801676-22802932	1149	7.28704	5.6642	6.39583	4.91371	2.42155	3.33026	3.65095	4.8081	5.46099	5.70729	1.96521
BnaA05g33770D	GSBRNA2G00064127001	chrA05:22805745-22807215	606	449.24	315.341	300.072	230.198	141.692	167.651	246.742	314.02	238.471	280.409	94.4123
BnaA05g34110D	GSBRNA2G00064167001	chrA05:23031774-23037597	3495	0.376666	14.3398	15.9069	13.0392	18.8432	24.9942	13.7776	14.4674	16.4913	11.6851	27.0096
BnaA05g34130D	GSBRNA2G00064169001	chrA05:23044381-23047236	2103	3.99043	8.0395	9.75848	8.50153	9.1697	10.7104	7.5775	8.96938	10.1054	7.17361	10.3443
BnaA05g34180D	GSBRNA2G00064174001	chrA05:23058451-23061191	1607	0.749371	0.876058	1.29645	1.31094	2.73609	0.634127	1.62515	0.469681	0.73618	1.32981	3.97334
BnaA05g34410D	GSBRNA2G00016979001	chrA05_random:119224-119933	709	120.33	99.9787	86.4736	71.3636	34.1068	60.546	64.628	82.5659	81.4737	48.4136	67.1298
BnaA05g34540D	GSBRNA2G00011209001	chrA05_random:193266-195579	1927	1.36645	5.18644	2.59208	4.91637	6.12941	6.57644	2.11455	3.14098	7.57552	7.4784	1.27499
BnaA05g34600D	GSBRNA2G00011035001	chrA05_random:244691-246867	1312	0.972165	1.57099	1.37	1.394	0.787384	0.738395	0.973536	0.76302	1.29308	0.769236	3.41513
BnaA05g34640D	GSBRNA2G00011039001	chrA05_random:250588-256924	4227	10.0036	9.41272	10.1952	8.75364	4.84056	7.61786	8.86573	8.47274	8.87154	7.50129	4.40696
BnaA05g34930D	GSBRNA2G00045699001	chrA05_random:414151-415850	941	1.03155	1.43287	0.929502	1.30459	1.28419	1.07356	0.866786	0.736933	1.43763	1.73654	7.42192
BnaA05g35020D	GSBRNA2G00007245001	chrA05_random:535043-536372	1287	3.70451	5.477	4.35567	3.64382	2.31834	2.3414	4.27047	4.66471	4.39209	2.38008	0.81709
BnaA05g35030D	GSBRNA2G00007246001	chrA05_random:538797-541944	1631	86.1975	60.3636	74.8005	68.3208	128.195	99.5077	70.3635	67.2562	78.8769	108.222	225.497
BnaA05g35680D	GSBRNA2G00036022001	chrA05_random:1108041-1108633	592	4.14705	9.60334	7.10002	7.13627	10.8124	7.57014	9.21252	8.20093	8.93312	8.18171	12.3048
BnaA05g35760D	GSBRNA2G00057747001	chrA05_random:1172551-1176200	2126	2.70587	2.65473	2.63826	2.23172	1.47808	1.00684	2.26487	2.38876	2.03965	2.20379	0.595535
BnaA05g35800D	GSBRNA2G00091930001	chrA05_random:1274161-1277074	2073	17.6636	13.9223	13.6226	10.2858	11.8841	14.3236	9.61957	12.0523	10.6568	12.0289	7.80468
BnaA05g35860D	GSBRNA2G00014887001	chrA05_random:1331360-1333231	1138	0.519556	0.694622	1.47765	0.953946	1.67781	2.33449	0.648277	1.1991	1.10364	0.867045	2.6125
BnaA05g36120D	GSBRNA2G00014452001	chrA05_random:1687569-1693566	3070	3.32108	3.87659	3.34192	3.75753	4.30031	2.5939	1.99056	2.23207	2.9522	1.6683	1.09571
BnaA05g36400D	GSBRNA2G00028133001	chrA05_random:2355560-2358447	1591	27.8412	27.1562	26.6968	29.8949	31.9606	23.6446	15.2128	18.7697	24.0447	16.5269	10.3658
BnaA05g36440D	GSBRNA2G00028139001	chrA05_random:2378232-2380551	1620	16.8433	17.0875	14.0917	12.8296	9.07034	12.447	14.3204	14.9901	13.8331	12.0149	4.42812
BnaA05g37040D	GSBRNA2G00025774001	chrA05_random:2853787-2854080	293	61.4125	44.7866	42.483	59.0105	32.467	35.9039	51.2459	41.8339	48.8755	31.0134	16.6841
BnaA05g37270D	GSBRNA2G00097695001	chrA05_random:2940357-2945416	2987	4.99965	5.0145	5.13109	4.59205	2.33558	3.17721	5.75733	5.30965	4.83039	3.5119	2.15956
BnaA05g37400D	GSBRNA2G00097708001	chrA05_random:2979452-2981047	1249	15.7757	7.98907	10.2522	9.2934	2.59498	4.04408	6.03517	8.69715	7.59117	4.67257	0.598642
BnaA05g37460D	GSBRNA2G00069922001	chrA05_random:3006791-3007184	393	2.26191	204.692	200.902	187.079	250.373	258.237	187.605	221.925	239.281	125.586	305.591
BnaA06g00400D	GSBRNA2G00024572001	chrA06:209322-213023	2494	2.99985	3.56665	3.76774	3.70949	5.27147	2.42061	4.28467	2.42962	3.12855	4.03978	6.93809
BnaA06g00690D	GSBRNA2G00024611001	chrA06:453011-455493	1851	36.1959	32.3451	34.586	26.4123	18.289	32.4381	27.1592	32.3687	28.8194	27.6132	5.92929
BnaA06g00920D	GSBRNA2G00024641001	chrA06:630004-633590	2208	0.893544	0.762133	0.939615	0.994604	0.939303	1.05863	0.796879	0.552271	0.866377	1.00115	3.14878
BnaA06g01060D	GSBRNA2G00024657001	chrA06:685783-689040	2129	156.869	157.006	145.75	142.647	268.293	338.811	155.631	145.806	174.119	248.172	383.648
BnaA06g01180D	GSBRNA2G00024673001	chrA06:759467-760540	1073	6.19483	7.16069	12.9188	12.0676	20.2351	3.46547	8.04845	6.28264	10.2599	6.41822	16.9793
BnaA06g01350D	GSBRNA2G00003335001	chrA06:843096-844135	503	1.65624	64.4922	61.0569	57.2261	103.908	124.892	51.712	60.1949	57.2798	53.0863	138.267
BnaA06g01630D	GSBRNA2G00008256001	chrA06:996060-997848	1086	3.75179	4.32985	3.56188	2.15445	1.23033	1.58747	3.58577	4.2162	3.5472	1.67887	0.546479
BnaA06g01670D	GSBRNA2G00008260001	chrA06:1007954-1012393	1855	0.546385	2.38038	1.72872	1.71787	1.58271	1.94229	1.87954	2.15626	1.60671	1.11905	2.58685
BnaA06g01900D	GSBRNA2G00050987001	chrA06:1100614-1102287	1108	0.433117	11.2618	13.4043	11.6274	22.8267	20.7541	13.2683	14.4298	14.4068	10.1999	22.712
BnaA06g01920D	GSBRNA2G00029836001	chrA06:1115531-1119439	2714	1.8273	1.82858	1.67178	1.76733	1.30376	1.75524	1.30126	1.23342	1.42003	1.07344	0.346526
BnaA06g02010D	GSBRNA2G00021236001	chrA06:1171330-1173011	1128	7.51361	11.1094	6.36304	10.0735	8.51422	9.33093	7.05274	7.02949	9.57932	7.66218	2.09361
BnaA06g02350D	GSBRNA2G00021190001	chrA06:1357823-1359380	1557	4.84795	4.85803	4.8389	3.31351	2.29094	3.03146	3.61494	4.67046	3.92207	2.53422	1.35553
BnaA06g02370D	GSBRNA2G00021188001	chrA06:1367736-1368177	441	26.6666	40.3049	25.8051	23.136	5.11087	3.00503	23.3825	39.1551	28.1958	5.87287	7.40731
BnaA06g02520D	GSBRNA2G00021172001	chrA06:1440349-1442601	1411	17.7881	17.3456	15.6324	14.0205	9.36991	6.96276	11.7288	16.7356	14.3572	8.03265	6.22402
BnaA06g02680D	GSBRNA2G00021151001	chrA06:1612303-1615104	1520	27.0278	17.6359	19.7064	17.8396	7.01644	13.8408	21.6321	20.3759	17.6964	10.8899	2.65078
BnaA06g02700D	GSBRNA2G00021149001	chrA06:1620856-1623366	2192	23.2469	24.4563	21.5166	19.2587	16.0878	20.6222	21.773	20.9884	20.1339	16.7915	9.16221
BnaA06g02780D	GSBRNA2G00021141001	chrA06:1652887-1654307	796	3.43688	4.14676	5.48821	5.58194	5.61873	4.87516	6.97466	3.64217	5.7502	3.85877	15.2522
BnaA06g02890D	GSBRNA2G00021128001	chrA06:1758039-1760262	1628	0.0438719	0.323998	0.46388	0.569612	0.776413	1.10947	1.02507	0.425105	0.421741	0.474839	1.16141
BnaA06g02960D	GSBRNA2G00098069001	chrA06:1800240-1802998	2758	1.65293	2.13249	1.79488	2.30915	7.71114	10.2184	3.89744	9.44623	1.91873	8.16057	7.2011
BnaA06g03070D	GSBRNA2G00098084001	chrA06:1850475-1852962	1424	2.72485	2.03194	2.09181	3.57823	2.75794	1.11306	3.76518	2.741	2.97072	2.67411	5.99251
BnaA06g03080D	GSBRNA2G00098085001	chrA06:1858088-1861938	2337	13.0882	12.4319	12.8999	12.5018	14.1785	9.03454	9.32564	9.6503	11.7334	8.69765	5.49773
BnaA06g03110D	GSBRNA2G00098088001	chrA06:1878287-1879717	1113	12.2849	12.3876	12.09	12.4966	10.1194	10.231	9.46976	11.2795	11.4599	10.3873	3.50521
[truncated: 3,901 more rows]
