# Supplementary material for: Time-Course Transcriptome Analysis of Compatible and Incompatible Pollen-Stigma Interactions in Brassica napus L
Source: Front Plant Sci. 2017 May 3;8:682. doi: 10.3389/fpls.2017.00682 (PMC5413569; doi:10.3389/fpls.2017.00682)
Supplement: Supplementary file 10 [file DataSheet9.XLSX]

## Sheet: up-regulated PC
Bna_gene_id	UP	PCLFD2	PCLFD5	PCLFD10	PCLFD20	PCLFD30
BnaA06g37010D	0	0	0	0	0	1.96814
BnaA01g24530D	0	0	0	0	0	1.41666
BnaA01g19880D	0	0	0	0	0	1.32076
BnaC04g40810D	0	0	0	0	0	2.91518
BnaCnng03810D	0	0	0	0	0	2.71575
BnaC06g31250D	0	0	0	0	0	2.67643
BnaCnng70410D	0	0	0	0	0	2.67544
BnaA02g05510D	0	0	0	0	0	2.50533
BnaA08g09740D	0	0	0	0	0	2.48701
BnaA01g02430D	0	0	0	0	0	2.37652
BnaCnng67300D	0	0	0	0	0	2.35606
BnaCnng39460D	0	0	0	0	0	2.25402
BnaC04g01980D	0	0	0	0	0	2.12682
BnaA07g00460D	0	0	0	0	0	2.02928
BnaC04g17620D	0	0	0	0	0	2.00624
BnaAnng13040D	0	0	0	0	0	1.97612
BnaC03g49470D	0	0	0	0	0	1.92776
BnaA09g25760D	0	0	0	0	0	1.91411
BnaCnng37560D	0	0	0	0	0	1.74275
BnaC02g16640D	0	0	0	0	0	1.65398
BnaC02g38460D	0	0	0	0	0	1.63843
BnaA05g02300D	0	0	0	0	0	1.63006
BnaA08g14970D	0	0	0	0	0	1.62989
BnaA04g27220D	0	0	0	0	0	1.62323
BnaA10g22680D	0	0	0	0	0	1.60163
BnaA02g30040D	0	0	0	0	0	1.57415
BnaA02g20040D	0	0	0	0	0	1.52381
BnaC09g47250D	0	0	0	0	0	1.46585
BnaA08g22240D	0	0	0	0	0	1.43032
BnaA03g53320D	0	0	0	0	0	1.40004
BnaC07g47300D	0	2.62177	3.04547	2.6878	0	2.98147
BnaC03g72320D	0	0	0	0	1.6267	2.2787
BnaA01g06610D	0	0	0	0	1.36103	1.66534
BnaA03g56550D	0	0	0	0	0	3.52769
BnaA02g16020D	0	0	0	0	0	3.35987
BnaC01g15640D	0	0	0	0	0	3.34121
BnaA10g29660D	0	0	1.55258	0	1.81613	2.15432
BnaC03g21360D	0	0	0	1.93657	1.91686	2.44406
BnaA02g31930D	0	0	0	0	2.04788	2.53573
BnaA09g30300D	0	0	0	0	1.90443	2.89464
BnaA02g27990D	0	0	0	0	1.89712	2.30189
BnaA02g20030D	0	0	0	0	1.86581	2.19868
BnaA05g09030D	0	0	0	0	1.77946	2.71874
BnaC03g59280D	0	0	0	0	1.6601	1.78424
BnaCnng76190D	0	0	0	0	1.61816	1.45796
BnaC01g02870D	0	1.61697	1.66322	1.51945	1.78729	2.09023
BnaA06g32020D	0	0	1.94817	0	1.76699	2.10247
BnaCnng28420D	0	0	1.89529	0	1.87274	2.37709
BnaCnng26490D	0	0	0	0	2.47191	2.53805
BnaA05g10680D	0	0	0	0	2.4454	3.28837
BnaA07g29470D	0	0	0	0	2.4311	3.00218
BnaA05g19210D	0	0	0	0	2.4252	2.7811
BnaA06g31630D	0	0	0	0	2.4131	2.33719
BnaA04g10500D	0	0	0	0	2.40536	3.42349
BnaC08g36840D	0	0	0	0	2.40151	2.84044
BnaC08g48860D	0	0	0	0	2.38488	3.17405
BnaC04g24800D	0	0	0	0	2.36614	2.63311
BnaC09g45480D	0	0	0	0	2.35445	3.13079
BnaC08g24010D	0	0	0	0	2.22126	2.63705
BnaC01g32200D	0	0	0	0	2.20937	3.10972
BnaA07g28600D	0	0	0	0	2.11589	2.69823
BnaC07g16820D	0	0	0	0	2.05393	1.99684
BnaA07g36300D	0	0	0	0	2.01549	1.70404
BnaA02g09590D	0	0	0	0	2.00675	2.0942
BnaC06g31950D	0	0	0	0	1.98537	2.05245
BnaA09g26030D	0	0	0	0	1.81753	1.45587
BnaA01g10780D	0	1.92803	1.79814	1.77893	1.92711	1.9935
BnaA08g30600D	0	1.79485	1.72883	1.6254	1.81171	2.14672
BnaA09g47100D	0	1.78187	1.75516	0	2.178	2.48213
BnaC07g20290D	0	1.71847	1.6423	0	2.16436	2.39802
BnaC08g22570D	0	1.62347	1.94785	0	1.95888	2.47571
BnaC01g11140D	0	1.5889	1.72457	0	2.17754	2.39803
BnaCnng51430D	0	0	1.98154	0	2.24204	2.46959
BnaC08g27710D	0	0	0	2.65593	2.81809	2.7627
BnaA06g12890D	0	0	0	2.56351	2.6715	2.87375
BnaC07g49750D	0	0	0	2.42619	2.61245	3.06672
BnaA03g33790D	0	0	0	1.945	2.50059	2.22689
BnaC03g39000D	0	0	0	0	3.37538	2.84339
BnaA04g02800D	0	0	0	0	3.15864	2.80486
BnaC05g23490D	0	0	0	0	3.15551	2.4437
BnaC07g05090D	0	0	0	0	3.15446	2.19183
BnaA07g37360D	0	0	0	0	3.12542	2.53499
BnaCnng56620D	0	0	0	0	3.11782	2.4448
BnaC06g27490D	0	0	0	0	3.11044	3.26447
BnaC03g22390D	0	0	0	0	3.01288	3.05981
BnaA07g15770D	0	0	0	0	2.93775	2.96635
BnaA04g27560D	0	0	0	0	2.91137	3.42535
BnaA07g35260D	0	0	0	0	2.83705	2.81652
BnaA03g10420D	0	0	0	0	2.75012	3.52192
BnaA03g50170D	0	0	0	0	2.73132	3.18648
BnaA01g05060D	0	0	0	0	2.68326	2.83196
BnaA04g15600D	0	0	0	0	2.67916	3.43748
BnaC06g32670D	0	0	0	0	2.62959	3.16699
BnaA06g21090D	0	0	0	0	2.61001	2.95915
BnaC02g09390D	0	0	0	0	2.60888	3.26968
BnaC03g54940D	0	0	0	0	2.59632	3.00182
BnaAnng07270D	0	0	0	0	2.55893	3.19547
BnaC06g38300D	0	0	0	0	2.22568	1.65016
BnaA06g24410D	0	1.99998	2.17469	0	2.17639	2.31228
BnaA02g35880D	0	1.90356	1.95314	1.85713	2.10591	2.29773
BnaC01g12360D	0	1.89407	1.81148	1.66379	2.21277	2.26806
BnaC07g22030D	0	1.8488	1.92495	1.67301	2.22978	2.57768
BnaC04g33430D	0	1.77782	1.80404	1.62141	2.2832	2.67525
BnaA08g09560D	0	1.75634	1.87919	1.65527	2.13468	2.45575
BnaA02g16460D	0	0	0	2.15354	2.84013	3.18524
BnaC04g38620D	0	0	0	1.90809	2.87444	3.49514
BnaA03g55320D	0	0	0	0	3.32179	3.36638
BnaC06g40170D	0	0	0	0	3.24751	3.49868
BnaCnng20480D	0	0	0	0	3.16968	3.91388
BnaC04g23900D	0	0	0	0	3.15725	3.47262
BnaA02g28700D	0	0	0	0	3.1231	4.05505
BnaA06g05490D	0	0	0	0	2.95217	3.60086
BnaA10g07620D	0	0	0	0	2.90027	4.17943
BnaC04g00440D	0	2.15699	2.14599	1.88066	2.21981	2.36592
BnaC08g46700D	0	1.87831	2.04083	1.92052	2.31618	2.57889
BnaA06g35470D	0	1.82284	1.8303	1.68422	2.30384	2.63514
BnaA03g28700D	0	0	0	3.06583	3.16751	3.15973
BnaA07g25880D	0	0	0	2.35944	3.29158	3.45971
BnaC05g50160D	0	0	0	0	3.48866	3.76006
BnaC05g09910D	0	0	0	0	3.477	3.70365
BnaC06g17580D	0	0	0	0	3.41953	3.86601
BnaAnng36730D	0	0	0	0	3.30137	3.99842
BnaA10g11500D	0	0	0	0	3.15859	4.42539
BnaA09g10210D	0	0	2.36771	2.09666	2.39064	2.98385
BnaC09g43250D	0	0	0	0	1.86344	0
BnaC08g17850D	0	0	0	0	1.84754	0
BnaC05g36760D	0	0	0	0	1.72546	0
BnaC03g06120D	0	0	0	0	1.69107	0
BnaA09g15090D	0	0	0	0	1.52271	0
BnaC06g21690D	0	0	0	0	3.76424	0
BnaC08g32840D	0	0	0	0	3.34676	0
BnaC04g32950D	0	0	0	0	2.80325	0
BnaA08g10090D	0	0	0	0	2.73053	0
BnaA07g33680D	0	0	0	0	2.65214	0
BnaA07g33690D	0	0	0	0	2.5766	0
BnaAnng20550D	0	0	0	0	2.36264	0
BnaA07g24860D	0	0	0	0	2.14615	0
BnaA07g20840D	0	0	0	0	2.12572	0
BnaA08g23120D	0	0	0	0	2.12065	0
BnaCnng51340D	0	0	0	0	2.08004	0
BnaC02g45000D	0	0	0	0	2.06162	0
BnaC03g47090D	0	0	0	0	2.03791	0
BnaC08g39210D	0	0	0	0	2.01048	0
BnaCnng51910D	0	0	0	0	1.94431	0
BnaC01g13940D	0	0	0	0	1.93995	0
BnaA09g38900D	0	0	0	0	1.91648	0
BnaC04g07740D	0	0	0	0	1.83064	0
BnaC05g51340D	0	0	0	0	1.81435	0
BnaA07g33410D	0	0	0	0	1.8022	0
BnaC04g56100D	0	0	0	0	1.58601	0
BnaA09g35010D	0	0	0	0	1.56383	0
BnaC02g32000D	0	0	0	0	1.55754	0
BnaA09g52790D	0	0	0	0	1.5101	0
BnaC03g22030D	0	0	0	0	1.50452	0
BnaC06g12160D	0	0	0	0	1.48995	0
BnaA01g01570D	0	0	0	0	1.48323	0
BnaA02g30210D	0	0	0	0	1.45888	0
BnaA10g23320D	0	0	0	0	1.44678	0
BnaC07g11270D	0	0	0	0	1.42006	0
BnaA03g09170D	0	0	0	0	1.40457	0
BnaA10g12840D	0	0	0	0	1.35795	0
BnaCnng67100D	0	0	4.36278	0	4.2768	0
BnaA05g18570D	0	0	0	0	0	2.83273
BnaA08g11240D	0	0	0	0	0	2.79207
BnaC04g05790D	0	0	0	0	0	2.08762
BnaA10g18690D	0	0	0	0	0	2.01134
BnaA05g27280D	0	0	0	0	0	1.99143
BnaA09g51230D	0	0	0	0	0	1.94376
BnaA02g20700D	0	0	0	0	0	1.90083
BnaCnng27960D	0	0	0	0	0	1.88627
BnaC03g08040D	0	0	0	0	0	1.84008
BnaC08g25500D	0	0	0	0	0	1.80857
BnaC03g56970D	0	0	0	0	0	1.78613
BnaC03g41310D	0	0	0	0	0	1.78331
BnaA09g17090D	0	0	0	0	0	1.70552
BnaA06g21470D	0	0	0	0	0	1.6612
BnaA07g06460D	0	0	0	0	0	1.65383
BnaCnng64010D	0	0	0	0	0	1.61891
BnaC04g29740D	0	0	0	0	0	1.58838
BnaC09g33860D	0	0	0	0	0	1.56894
BnaA07g10650D	0	0	0	0	0	1.53834
BnaA02g07040D	0	0	0	0	0	1.52337
BnaC06g18540D	0	0	0	0	0	1.48916
BnaC05g17530D	0	0	0	0	0	1.45646
BnaA06g25030D	0	0	0	0	0	1.4302
BnaAnng22680D	0	0	0	0	0	2.92707
BnaC08g45980D	0	0	0	0	0	2.84321
BnaCnng00770D	0	0	0	0	0	2.64279
BnaA09g04420D	0	0	0	0	0	2.6283
BnaC01g11030D	0	0	0	0	0	2.58389
BnaA06g09880D	0	0	0	0	0	2.54624
BnaC03g18590D	0	0	0	0	0	2.53492
BnaC03g58870D	0	0	0	0	0	2.49527
BnaC09g27860D	0	0	0	0	0	2.40642
BnaA03g48570D	0	0	0	0	0	2.40202
BnaCnng37990D	0	0	0	0	0	2.37373
BnaAnng03830D	0	0	0	0	0	2.33155
BnaC04g32770D	0	0	0	0	0	2.32343
BnaC03g30130D	0	0	0	0	0	2.27795
BnaA04g19600D	0	0	0	0	0	2.26396
BnaA07g33470D	0	0	0	0	0	2.1862
BnaA09g47910D	0	0	0	0	0	2.18211
BnaA03g21460D	0	0	0	0	0	2.17147
BnaA06g17950D	0	0	0	0	0	2.16133
BnaA04g20720D	0	0	0	0	0	2.14615
BnaA08g25990D	0	0	0	0	0	2.14347
BnaCnng19560D	0	0	0	0	0	2.11153
BnaA07g30990D	0	0	0	0	0	2.09595
BnaC08g18640D	0	0	0	0	0	2.09437
BnaA05g16360D	0	0	0	0	0	2.09051
BnaC04g48670D	0	0	0	0	0	2.08831
BnaC05g25300D	0	0	0	0	0	2.08766
BnaC04g55020D	0	0	0	0	0	2.07404
BnaA08g22180D	0	0	0	0	0	2.07351
BnaC09g43990D	0	0	0	0	0	2.06161
BnaC04g43980D	0	0	0	0	0	1.98788
BnaA06g33910D	0	0	0	0	0	1.95982
BnaA05g24160D	0	0	0	0	0	1.94259
BnaC01g24660D	0	0	0	0	0	1.93817
BnaC05g09920D	0	0	0	0	0	1.9346
BnaCnng22570D	0	0	0	0	0	1.92247
BnaC01g44940D	0	0	0	0	0	1.91174
BnaC01g11450D	0	0	0	0	0	1.9062
BnaC09g10360D	0	0	0	0	0	1.90498
BnaA09g36730D	0	0	0	0	0	1.83318
BnaC02g33330D	0	0	0	0	0	1.83297
BnaC02g37260D	0	0	0	0	0	1.83038
BnaAnng32290D	0	0	0	0	0	1.8291
BnaA09g25690D	0	0	0	0	0	1.82802
BnaC04g27770D	0	0	0	0	0	1.81132
BnaC05g45340D	0	0	0	0	0	1.8058
BnaC02g35530D	0	0	0	0	0	1.79729
BnaC02g39630D	0	0	0	0	0	1.79467
BnaC07g45620D	0	0	0	0	0	1.79111
BnaA06g34530D	0	0	0	0	0	1.78993
BnaA09g30080D	0	0	0	0	0	1.77187
BnaA04g02430D	0	0	0	0	0	1.76816
BnaAnng27200D	0	0	0	0	0	1.75574
BnaA06g33960D	0	0	0	0	0	1.75048
BnaAnng11580D	0	0	0	0	0	1.74508
BnaC06g40000D	0	0	0	0	0	1.74317
BnaA07g38960D	0	0	0	0	0	1.73782
BnaA03g00190D	0	0	0	0	0	1.73239
BnaA02g34120D	0	0	0	0	0	1.72663
BnaCnng01480D	0	0	0	0	0	1.71699
BnaC04g26710D	0	0	0	0	0	1.71682
BnaA09g48680D	0	0	0	0	0	1.71506
BnaA09g21860D	0	0	0	0	0	1.71465
BnaC05g33800D	0	0	0	0	0	1.70505
BnaC09g30620D	0	0	0	0	0	1.69429
BnaA09g24630D	0	0	0	0	0	1.69172
BnaA09g44300D	0	0	0	0	0	1.68964
BnaA09g05080D	0	0	0	0	0	1.68928
BnaA05g05930D	0	0	0	0	0	1.68059
BnaA05g22470D	0	0	0	0	0	1.67434
BnaC06g38020D	0	0	0	0	0	1.67125
BnaA10g25720D	0	0	0	0	0	1.66236
BnaA07g17850D	0	0	0	0	0	1.65571
BnaA09g22670D	0	0	0	0	0	1.64634
BnaC02g48820D	0	0	0	0	0	1.63594
BnaA07g27960D	0	0	0	0	0	1.63005
BnaAnng31270D	0	0	0	0	0	1.62317
BnaA02g26600D	0	0	0	0	0	1.61833
BnaC01g27440D	0	0	0	0	0	1.61804
BnaC03g31100D	0	0	0	0	0	1.61568
BnaC07g30390D	0	0	0	0	0	1.6096
BnaA01g19870D	0	0	0	0	0	1.60844
BnaC09g45790D	0	0	0	0	0	1.60705
BnaA10g20920D	0	0	0	0	0	1.60097
BnaA05g05700D	0	0	0	0	0	1.58889
BnaC09g44950D	0	0	0	0	0	1.58774
BnaC07g23090D	0	0	0	0	0	1.58372
BnaCnng36540D	0	0	0	0	0	1.57671
BnaC04g50850D	0	0	0	0	0	1.56157
BnaC07g35070D	0	0	0	0	0	1.56097
BnaA01g09520D	0	0	0	0	0	1.55823
BnaC03g33680D	0	0	0	0	0	1.55549
BnaC09g04640D	0	0	0	0	0	1.55468
BnaC05g24240D	0	0	0	0	0	1.55358
BnaC05g17150D	0	0	0	0	0	1.54977
BnaC07g21980D	0	0	0	0	0	1.54942
BnaA05g34130D	0	0	0	0	0	1.53896
BnaC09g39170D	0	0	0	0	0	1.53761
BnaC05g15590D	0	0	0	0	0	1.53534
BnaC06g23310D	0	0	0	0	0	1.53315
BnaC04g46450D	0	0	0	0	0	1.53228
BnaC08g26190D	0	0	0	0	0	1.52667
BnaA02g34090D	0	0	0	0	0	1.52342
BnaC02g38520D	0	0	0	0	0	1.51725
BnaC02g18150D	0	0	0	0	0	1.49843
BnaC04g24260D	0	0	0	0	0	1.4933
BnaAnng40320D	0	0	0	0	0	1.48483
BnaC07g44740D	0	0	0	0	0	1.4737
BnaA05g02290D	0	0	0	0	0	1.46437
BnaA03g40940D	0	0	0	0	0	1.46075
BnaA10g07320D	0	0	0	0	0	1.45748
BnaC07g17400D	0	0	0	0	0	1.44511
BnaA08g13650D	0	0	0	0	0	1.43962
BnaC01g04860D	0	0	0	0	0	1.43929
BnaA02g30100D	0	0	0	0	0	1.42293
BnaC08g46010D	0	0	0	0	0	1.42136
BnaA08g28140D	0	0	0	0	0	1.41817
BnaC03g48600D	0	0	0	0	0	1.41576
BnaA09g51200D	0	0	0	0	0	1.40639
BnaC03g11820D	0	0	0	0	0	1.4047
BnaA08g17810D	0	0	0	0	0	1.39929
BnaC04g27800D	0	0	0	0	0	1.39657
BnaC06g36880D	0	0	0	0	0	1.39054
BnaA03g50900D	0	0	0	0	0	1.37384
BnaC06g16600D	0	0	0	0	0	1.357
BnaC03g48540D	0	0	0	0	0	1.34536
BnaA06g18440D	0	0	0	0	0	1.34414
BnaC08g01920D	0	0	0	0	0	1.34041
BnaC01g19800D	0	0	0	0	0	1.32958
BnaC07g40160D	0	1.66363	0	0	0	2.02928
BnaC08g46150D	0	0	0	2.41498	0	2.17566
BnaA06g35100D	0	0	0	0	1.77618	2.01905
BnaC05g48240D	0	0	0	0	1.70508	2.14554
BnaA09g30800D	0	0	0	0	1.69236	2.01116
BnaC03g33810D	0	0	0	0	1.68769	2.06415
BnaCnng30830D	0	0	0	0	1.67407	2.04576
BnaC04g50490D	0	0	0	0	1.65559	2.17777
BnaA07g28840D	0	0	0	0	1.65209	1.96195
BnaA08g24480D	0	0	0	0	1.65194	2.04693
BnaC02g27050D	0	0	0	0	1.62663	2.00158
BnaC09g40960D	0	0	0	0	1.61857	2.36105
BnaC03g40170D	0	0	0	0	1.59995	2.31654
BnaA04g07520D	0	0	0	0	1.58874	1.78929
BnaC01g12370D	0	0	0	0	1.58651	1.7621
BnaA06g08460D	0	0	0	0	1.57094	1.76466
BnaC03g23130D	0	0	0	0	1.56085	1.88477
BnaC06g14100D	0	0	0	0	1.55678	1.75694
BnaA01g07750D	0	0	0	0	1.55132	2.05861
BnaC03g69560D	0	0	0	0	1.53109	1.76828
BnaC07g14830D	0	0	0	0	1.51303	1.79958
BnaC04g41140D	0	0	0	0	1.50069	2.24197
BnaA06g33260D	0	0	0	0	1.49831	1.61707
BnaC05g19630D	0	0	0	0	1.49216	1.7501
BnaAnng29590D	0	0	0	0	1.47547	1.55839
BnaC01g19520D	0	0	0	0	1.46456	1.88871
BnaC01g07220D	0	0	0	0	1.46258	1.81954
BnaC01g11610D	0	0	0	0	1.44888	1.89203
BnaC06g00180D	0	0	0	0	1.44241	1.49123
BnaC04g34480D	0	0	0	0	1.43969	1.68695
BnaCnng71320D	0	0	0	0	1.43509	1.65441
BnaA10g25000D	0	0	0	0	1.42658	1.58926
BnaA04g02760D	0	0	0	0	1.42397	1.4426
BnaA02g01510D	0	0	0	0	1.41954	1.38941
BnaA03g21310D	0	0	0	0	1.41818	1.82948
BnaA09g30920D	0	0	0	0	1.4164	1.54715
BnaA01g04520D	0	0	0	0	1.41177	1.70511
BnaA05g24830D	0	0	0	0	1.3974	2.10229
BnaC05g48570D	0	0	0	0	1.39312	1.71153
BnaCnng02170D	0	0	0	0	1.38712	1.71977
BnaC08g17460D	0	0	0	0	1.37771	1.54557
BnaA01g09740D	0	0	0	0	1.37514	2.11868
BnaA06g15870D	0	0	0	0	1.36798	1.40044
BnaA03g37260D	0	0	0	0	1.36038	2.50239
BnaC03g56160D	0	0	0	0	1.34752	1.75983
BnaA05g33490D	0	0	0	0	1.34729	1.90532
BnaA03g43160D	0	0	0	0	0	4.34845
BnaC06g27130D	0	0	0	0	0	4.13054
BnaA03g48940D	0	0	0	0	0	4.08997
BnaA04g23070D	0	0	0	0	0	4.0604
BnaA09g53450D	0	0	0	0	0	4.05341
BnaC02g12100D	0	0	0	0	0	3.94383
BnaA03g57420D	0	0	0	0	0	3.72646
BnaCnng02420D	0	0	0	0	0	3.66038
BnaC05g25430D	0	0	0	0	0	3.65027
BnaA06g31300D	0	0	0	0	0	3.45806
BnaC02g31870D	0	0	0	0	0	3.42582
BnaCnng12720D	0	0	0	0	0	3.30631
BnaA06g24830D	0	0	0	0	0	3.28512
BnaCnng42530D	0	0	0	0	0	3.171
BnaC06g31000D	0	0	0	0	0	3.09837
BnaA04g29360D	0	1.95229	0	0	1.81871	2.1045
BnaC03g06960D	0	1.41354	1.69749	0	1.56362	2.0388
BnaC03g13600D	0	0	1.92275	0	1.6079	2.00432
BnaC05g09840D	0	0	1.6323	0	1.83095	1.93764
BnaC09g24050D	0	0	0	2.20065	1.69252	1.80809
BnaA08g22690D	0	0	0	1.88073	1.73867	2.21336
BnaC04g45600D	0	0	0	0	2.15169	2.51521
BnaA08g01830D	0	0	0	0	2.11629	2.35204
BnaC05g36000D	0	0	0	0	2.10648	2.36026
BnaC03g52390D	0	0	0	0	2.0534	2.48143
BnaC08g46740D	0	0	0	0	2.03399	2.466
BnaA04g26460D	0	0	0	0	2.03217	2.52903
BnaC04g28260D	0	0	0	0	2.02318	2.55603
BnaC08g01080D	0	0	0	0	1.99266	2.20014
BnaA06g17850D	0	0	0	0	1.98806	2.48058
BnaA06g25550D	0	0	0	0	1.98061	2.33287
BnaC08g42830D	0	0	0	0	1.97776	2.27795
BnaC06g31940D	0	0	0	0	1.97643	2.40851
BnaA08g11740D	0	0	0	0	1.97144	2.57782
BnaC06g24480D	0	0	0	0	1.96801	2.281
BnaA09g30760D	0	0	0	0	1.96532	2.41736
BnaA08g17380D	0	0	0	0	1.95692	2.64851
BnaA04g18040D	0	0	0	0	1.9512	2.2367
BnaA01g15000D	0	0	0	0	1.90527	2.37204
BnaC03g52400D	0	0	0	0	1.88467	2.31581
BnaA02g13820D	0	0	0	0	1.88433	2.09542
BnaC02g42100D	0	0	0	0	1.88249	2.61405
BnaC03g66270D	0	0	0	0	1.87614	2.33424
BnaC07g42640D	0	0	0	0	1.87323	2.23532
BnaC09g11350D	0	0	0	0	1.84585	2.1233
BnaCnng01200D	0	0	0	0	1.84219	2.14146
BnaC07g24080D	0	0	0	0	1.83964	2.4888
BnaC03g27140D	0	0	0	0	1.8351	2.06308
BnaC07g21450D	0	0	0	0	1.83458	2.01206
BnaA09g03100D	0	0	0	0	1.82524	2.4329
BnaC08g49480D	0	0	0	0	1.82322	2.39903
BnaC06g23720D	0	0	0	0	1.81085	2.58507
BnaA03g51590D	0	0	0	0	1.79918	1.97444
BnaC02g34840D	0	0	0	0	1.79842	2.16612
BnaUnng00020D	0	0	0	0	1.79775	1.99707
BnaC08g13980D	0	0	0	0	1.79563	2.6451
BnaA10g23820D	0	0	0	0	1.78771	1.80069
BnaC05g10520D	0	0	0	0	1.77724	1.91471
BnaA09g35450D	0	0	0	0	1.77094	2.17461
BnaC08g41730D	0	0	0	0	1.76964	1.75631
BnaCnng13990D	0	0	0	0	1.76791	1.89275
BnaA01g16370D	0	0	0	0	1.76411	2.12899
BnaC05g17480D	0	0	0	0	1.75998	2.14964
BnaA07g35800D	0	0	0	0	1.75717	1.90729
BnaC05g10770D	0	0	0	0	1.75143	1.78067
BnaCnng72960D	0	0	0	0	1.74042	1.7472
BnaC06g43540D	0	0	0	0	1.74017	1.67665
BnaA03g25630D	0	0	0	0	1.74013	1.82193
BnaA01g12340D	0	0	0	0	1.73625	1.73242
BnaA09g36820D	0	0	0	0	1.73431	1.8296
BnaA10g17590D	0	0	0	0	1.73195	2.36781
BnaC02g04560D	0	0	0	0	1.72362	1.91992
BnaAnng34650D	0	0	0	0	1.71178	1.70205
BnaC07g22090D	0	0	0	0	1.69742	2.53448
BnaC09g36590D	0	0	0	0	1.69538	2.46177
BnaCnng29300D	0	0	0	0	1.68611	2.53639
BnaC06g06860D	0	0	0	0	1.68415	1.8444
BnaA05g23160D	0	0	0	0	1.66606	1.63649
BnaC08g21160D	0	0	0	0	1.66247	1.54208
BnaA03g10920D	0	0	0	0	1.65824	1.81537
BnaC06g31880D	0	0	0	0	1.6084	1.74117
BnaAnng14710D	0	0	0	0	1.57014	1.68927
BnaCnng62150D	0	0	0	0	1.52569	1.45663
BnaC08g35020D	0	0	0	0	1.50674	1.39402
BnaA10g12720D	0	0	0	0	1.48676	1.50065
BnaC03g56410D	0	0	0	0	1.44296	1.39006
BnaC03g32570D	0	0	0	0	0	6.1981
BnaA01g32580D	0	0	0	0	0	6.01879
BnaC01g29540D	0	0	0	0	0	6.01815
BnaC05g36370D	0	0	0	0	0	5.9855
BnaA06g34760D	0	0	0	0	0	5.74146
BnaA05g01950D	0	0	0	0	0	5.62908
BnaC08g20840D	0	0	0	0	0	5.44681
BnaA10g10580D	0	1.73131	1.71414	0	1.80498	2.0639
BnaA03g07740D	0	1.50726	1.53457	0	2.04841	2.29579
BnaA09g41600D	0	0	1.74542	0	2.00956	1.9291
BnaAnng17740D	0	0	1.66368	0	1.99638	2.7338
BnaC03g62800D	0	0	1.54741	0	1.93811	2.17401
BnaC03g39170D	0	0	0	0	2.68003	2.50454
BnaC06g15040D	0	0	0	0	2.67784	2.69639
BnaC07g49810D	0	0	0	0	2.63586	2.5321
BnaC05g21480D	0	0	0	0	2.60805	2.68637
BnaA05g10700D	0	0	0	0	2.59334	2.72697
BnaA02g34140D	0	0	0	0	2.59083	2.6505
BnaC01g07540D	0	0	0	0	2.58074	2.82579
BnaA03g23010D	0	0	0	0	2.57374	2.52995
BnaCnng06220D	0	0	0	0	2.54727	2.61215
BnaA09g41810D	0	0	0	0	2.50894	2.31978
BnaA09g43130D	0	0	0	0	2.49009	2.72339
BnaAnng19370D	0	0	0	0	2.46046	2.86086
BnaC03g21390D	0	0	0	0	2.4529	2.6086
BnaA10g11710D	0	0	0	0	2.44242	2.515
BnaA10g08320D	0	0	0	0	2.43757	2.24267
BnaAnng17960D	0	0	0	0	2.41596	2.9206
BnaAnng03040D	0	0	0	0	2.39158	2.44732
BnaA09g31110D	0	0	0	0	2.34971	2.49826
BnaC06g31180D	0	0	0	0	2.34915	2.27841
BnaC09g29270D	0	0	0	0	2.3382	3.07781
BnaAnng20740D	0	0	0	0	2.33412	2.4149
BnaC09g40550D	0	0	0	0	2.32938	2.82864
BnaA07g12410D	0	0	0	0	2.31875	2.48095
BnaAnng04790D	0	0	0	0	2.293	2.74207
BnaA06g22060D	0	0	0	0	2.28757	2.48295
BnaA02g27010D	0	0	0	0	2.2856	2.49895
BnaCnng39320D	0	0	0	0	2.28393	2.38452
BnaA06g02960D	0	0	0	0	2.27981	2.74422
BnaA01g34170D	0	0	0	0	2.2689	2.49006
BnaA06g09070D	0	0	0	0	2.24963	2.21504
BnaA09g18500D	0	0	0	0	2.24578	2.37265
BnaC06g05410D	0	0	0	0	2.24504	2.553
BnaA06g10790D	0	0	0	0	2.24209	2.59257
BnaA05g30880D	0	0	0	0	2.22973	2.63386
BnaA05g34540D	0	0	0	0	2.22312	2.38293
BnaA06g35120D	0	0	0	0	2.2131	2.37095
BnaC01g17710D	0	0	0	0	2.1965	2.68009
BnaAnng17910D	0	0	0	0	2.19306	2.9981
BnaA10g12780D	0	0	0	0	2.17825	2.11235
BnaC02g06930D	0	0	0	0	2.17489	3.23901
BnaC03g48070D	0	0	0	0	2.16303	2.62827
BnaA03g05430D	0	0	0	0	2.1615	2.56605
BnaA06g11320D	0	0	0	0	2.15587	3.24083
BnaC08g19730D	0	0	0	0	2.15156	2.79929
BnaC08g07580D	0	0	0	0	2.14805	1.92125
BnaA09g51620D	0	0	0	0	2.14788	2.6142
BnaC03g78270D	0	0	0	0	2.13814	2.23998
BnaAnng08350D	0	0	0	0	2.13194	2.84343
BnaC08g48340D	0	0	0	0	2.13187	1.90592
BnaC07g25020D	0	0	0	0	2.11699	2.08462
BnaCnng70940D	0	0	0	0	2.10398	3.11828
BnaC01g16430D	0	0	0	0	2.09545	2.25433
BnaA06g23600D	0	0	0	0	2.09245	2.27674
BnaC03g74630D	0	0	0	0	2.08377	2.22815
BnaA03g01040D	0	0	0	0	2.07558	2.06295
BnaC08g32370D	0	0	0	0	2.06582	1.99112
BnaA01g28690D	0	0	0	0	2.049	2.12258
BnaC07g48760D	0	0	0	0	2.02934	2.05861
BnaA09g07140D	0	0	0	0	2.02811	2.20368
BnaA04g09500D	0	0	0	0	2.00658	1.89261
BnaA04g00630D	0	0	0	0	1.99948	2.13604
BnaA06g31640D	0	0	0	0	1.99919	1.86295
BnaC05g14050D	0	0	0	0	1.97346	2.06008
BnaCnng47130D	0	0	0	0	1.89375	1.62692
BnaCnng05510D	0	0	0	0	1.88271	1.71651
BnaC08g25010D	0	0	0	0	1.84674	1.84512
BnaCnng58090D	0	0	0	0	1.83343	1.7321
BnaA08g23150D	0	0	0	0	1.83335	1.7068
BnaA06g38470D	0	0	0	0	1.79935	1.80899
BnaC02g43000D	0	0	0	0	1.6728	1.47518
BnaC08g03520D	0	0	0	0	0	6.89518
BnaC01g00200D	0	0	0	0	0	6.85305
BnaA10g02600D	0	0	0	0	0	6.78526
BnaC03g73380D	0	0	0	0	0	6.55167
BnaA03g28540D	0	0	0	0	0	6.50131
BnaA03g01150D	0	0	1.74982	0	2.291	2.47985
BnaC02g36110D	0	0	0	2.40481	2.37772	3.09847
BnaCnng12640D	0	0	0	2.39575	2.47925	3.09889
BnaAnng21760D	0	0	0	2.32838	2.47677	3.20861
BnaA04g10650D	0	0	0	0	3.39631	2.6065
BnaC03g25270D	0	0	0	0	3.02963	2.88014
BnaA04g05470D	0	0	0	0	3.02536	2.76012
BnaA08g23020D	0	0	0	0	2.92914	3.28172
BnaAnng10520D	0	0	0	0	2.92159	2.90363
BnaA03g26600D	0	0	0	0	2.91146	2.99083
BnaA07g14070D	0	0	0	0	2.84367	2.98706
BnaC06g13430D	0	0	0	0	2.82516	3.27964
BnaC06g37510D	0	0	0	0	2.76992	2.50589
BnaAnng09500D	0	0	0	0	2.76661	3.0648
BnaA06g17960D	0	0	0	0	2.75125	2.84846
BnaC07g43490D	0	0	0	0	2.71996	2.73957
BnaA04g09680D	0	0	0	0	2.7055	3.56489
BnaCnng20740D	0	0	0	0	2.66772	3.11453
BnaAnng32610D	0	0	0	0	2.65946	2.42493
BnaC03g56180D	0	0	0	0	2.65854	2.94218
BnaC05g32670D	0	0	0	0	2.65848	2.91744
BnaC07g41150D	0	0	0	0	2.65705	3.28125
BnaC09g35160D	0	0	0	0	2.64724	2.43944
BnaA01g29290D	0	0	0	0	2.64605	3.57021
BnaC01g36720D	0	0	0	0	2.55089	3.40052
BnaC07g08430D	0	0	0	0	2.54279	3.1313
BnaA03g15380D	0	0	0	0	2.52542	3.35925
BnaC09g26890D	0	0	0	0	2.51605	3.2719
BnaA03g55860D	0	0	0	0	2.50658	1.8075
BnaA09g36180D	0	0	0	0	2.49878	2.18135
BnaAnng29030D	0	0	0	0	2.45714	1.97659
BnaA02g36030D	0	0	0	0	2.39573	1.64568
BnaA03g15750D	0	0	0	0	2.37294	3.56217
BnaA02g10950D	0	0	0	0	2.31685	1.53586
BnaA07g35790D	0	0	0	0	2.25118	1.84495
BnaC01g17060D	0	0	2.26664	0	2.4449	2.95173
BnaA01g06270D	0	0	2.10406	0	2.58726	2.76859
BnaC05g38940D	0	0	0	2.33983	2.84882	3.49019
BnaA05g31720D	0	0	0	0	3.28106	3.75165
BnaC03g73930D	0	0	0	0	3.26649	3.52973
BnaC04g28220D	0	0	0	0	3.24422	3.08869
BnaC07g45900D	0	0	0	0	3.24211	3.85794
BnaC08g18580D	0	0	0	0	3.07946	3.40614
BnaA07g03490D	0	0	0	0	3.03616	3.79343
BnaA08g22720D	0	0	0	0	3.00837	1.91765
BnaC09g30100D	0	0	0	0	2.98993	3.56383
BnaC02g48610D	0	0	2.57093	0	2.30296	3.13306
BnaA07g25350D	0	0	2.096	0	2.68467	3.13664
BnaC05g50380D	0	0	0	0	3.64072	3.74787
BnaA01g30380D	0	0	0	0	3.60454	3.74553
BnaA08g21940D	0	0	0	0	3.6424	3.84992
BnaC09g06860D	0	0	0	0	3.73866	3.77385
BnaC03g03040D	0	0	0	0	6.83459	0
BnaC09g00100D	0	0	0	0	5.97675	0
BnaA09g04280D	0	0	0	0	2.91279	0
BnaC06g21970D	0	0	0	0	2.36356	1.37146
BnaCnng08620D	0	0	0	0	2.30251	0
BnaA03g39840D	0	0	0	0	2.29879	0
BnaA05g33110D	0	0	0	0	2.28555	0
BnaAnng33440D	0	0	0	0	2.23529	0
BnaC07g21510D	0	0	0	0	2.20823	0
BnaA06g34320D	0	0	0	0	2.19582	0
BnaA10g25120D	0	0	0	0	2.08658	0
BnaA03g09530D	0	0	0	0	2.04152	0
BnaA09g15080D	0	0	0	0	2.00039	0
BnaA09g08810D	0	0	0	0	1.90625	0
BnaA10g00370D	0	0	0	0	1.78236	0
BnaAnng32690D	0	0	0	0	1.77428	0
BnaC01g32590D	0	0	0	0	1.7318	0
BnaC08g41800D	0	0	0	0	1.48861	0
BnaA06g34240D	0	0	0	0	1.33364	0
BnaA05g01610D	0	0	0	0	6.53993	0
BnaA07g32920D	0	0	0	0	6.23426	0
BnaC02g08380D	0	0	0	0	6.1132	0
BnaA09g47690D	0	0	0	0	6.10077	0
BnaA06g01350D	0	0	0	0	6.03013	0
BnaC04g31430D	0	0	0	0	5.87088	0
BnaCnng57640D	0	0	0	0	5.816	0
BnaC05g01680D	0	0	0	0	5.80183	0
BnaA02g06790D	0	0	0	0	3.76689	0
BnaC09g16820D	0	0	0	0	3.51056	0
BnaA09g43560D	0	0	0	0	3.40247	0
BnaC04g15370D	0	0	0	0	3.37664	0
BnaA09g27390D	0	0	0	0	3.37114	0
BnaC03g11570D	0	0	0	0	3.24484	0
BnaC05g47350D	0	0	0	0	2.97068	0
BnaC03g57350D	0	0	0	0	2.94669	0
BnaC08g08210D	0	0	0	0	2.86174	0
BnaAnng37270D	0	0	0	0	2.81586	0
BnaA02g11430D	0	0	0	0	2.64661	0
BnaC02g34540D	0	0	0	0	2.64585	0
BnaC03g58590D	0	0	0	0	2.62099	0
BnaC06g26190D	0	0	0	0	2.52542	0
BnaA09g08470D	0	0	0	0	2.48463	0
BnaC09g11080D	0	0	0	0	2.37	0
BnaA10g19670D	0	0	0	0	2.32718	0
BnaA07g38550D	0	0	0	0	2.30723	0
BnaA03g40660D	0	0	0	0	2.29526	0
BnaA03g55560D	0	0	0	0	2.24625	0
BnaC07g47260D	0	0	0	0	2.20334	0
BnaC02g09510D	0	0	0	0	2.16455	0
BnaA08g24680D	0	0	0	0	2.16232	0
BnaA06g40660D	0	0	0	0	2.15266	0
BnaC09g28100D	0	0	0	0	2.14592	0
BnaC06g36590D	0	0	0	0	2.13214	0
BnaC09g37120D	0	0	0	0	2.13058	0
BnaAnng37080D	0	0	0	0	2.12903	0
BnaC03g14350D	0	0	0	0	2.11625	0
BnaA10g07250D	0	0	0	0	2.09886	0
BnaA04g06040D	0	0	0	0	2.07545	0
BnaC02g10060D	0	0	0	0	2.0507	0
BnaA05g12980D	0	0	0	0	2.03168	0
BnaA10g14750D	0	0	0	0	2.00079	0
BnaCnng73290D	0	0	0	0	1.98676	0
BnaCnng06770D	0	0	0	0	1.97465	0
BnaC08g26910D	0	0	0	0	1.96818	0
BnaA03g04590D	0	0	0	0	1.94549	0
BnaC02g05070D	0	0	0	0	1.94321	0
BnaC08g20810D	0	0	0	0	1.92459	0
BnaC04g03750D	0	0	0	0	1.89587	0
BnaC09g49920D	0	0	0	0	1.89264	0
BnaA04g22070D	0	0	0	0	1.8876	0
BnaA03g17030D	0	0	0	0	1.88362	0
BnaA03g13740D	0	0	0	0	1.87575	0
BnaA03g16770D	0	0	0	0	1.86147	0
BnaAnng29470D	0	0	0	0	1.85737	0
BnaC03g22200D	0	0	0	0	1.83681	0
BnaC09g50050D	0	0	0	0	1.83026	0
BnaA05g06580D	0	0	0	0	1.82348	0
BnaA08g26490D	0	0	0	0	1.82153	0
BnaC08g21320D	0	0	0	0	1.81612	0
BnaA01g08120D	0	0	0	0	1.79975	0
BnaA02g06880D	0	0	0	0	1.7909	0
BnaA07g21490D	0	0	0	0	1.78077	0
BnaC08g22920D	0	0	0	0	1.77638	0
BnaA06g01180D	0	0	0	0	1.76287	0
BnaC01g09700D	0	0	0	0	1.72816	0
BnaC06g37960D	0	0	0	0	1.7241	0
BnaC03g14810D	0	0	0	0	1.72342	0
BnaA05g20240D	0	0	0	0	1.71044	0
BnaA10g07760D	0	0	0	0	1.70408	0
BnaC02g41520D	0	0	0	0	1.69009	0
BnaA02g07120D	0	0	0	0	1.68054	0
BnaA06g36710D	0	0	0	0	1.67027	0
BnaA07g14280D	0	0	0	0	1.6636	0
BnaC09g51620D	0	0	0	0	1.66188	0
BnaC08g46130D	0	0	0	0	1.65869	0
BnaC02g48560D	0	0	0	0	1.65694	0
BnaA06g06160D	0	0	0	0	1.63209	0
BnaA09g42610D	0	0	0	0	1.61722	0
BnaA10g23500D	0	0	0	0	1.61614	0
BnaA02g31900D	0	0	0	0	1.60849	0
BnaA01g06730D	0	0	0	0	1.55217	0
BnaA10g12960D	0	0	0	0	1.53946	0
BnaC09g48200D	0	0	0	0	1.5303	0
BnaC08g22640D	0	0	0	0	1.50009	0
BnaA08g15200D	0	0	0	0	1.4915	0
BnaC04g38330D	0	0	0	0	1.48799	0
BnaC01g04460D	0	0	0	0	1.48467	0
BnaA08g26170D	0	0	0	0	1.48145	0
BnaCnng41520D	0	0	0	0	1.43647	0
BnaA07g32220D	0	0	0	0	1.41292	0
BnaC01g20780D	0	0	0	0	1.40093	0
BnaC03g18040D	0	0	0	0	1.39989	0
BnaCnng08770D	0	0	0	0	1.30483	0
BnaA06g40080D	0	0	0	0	1.29034	0
BnaC03g30070D	0	0	0	0	1.26331	0
BnaA01g30830D	0	0	2.46795	0	2.38971	0
BnaC02g15950D	0	0	2.38848	0	2.4571	0
BnaC09g30110D	0	0	0	2.95272	3.43372	0
BnaA08g07360D	0	0	0	0	2.79432	1.53658

## Sheet: up-regulated PI
Bna_gene_id	UP	PILFD2	PILFD5	PILFD10	PILFD20	PILFD30
BnaA08g18440D	0	2.51356	0	0	2.62476	3.66267
BnaC04g21470D	0	0	0	0	5.1919	0
BnaC02g14450D	0	0	0	0	2.55902	3.95623
BnaA04g13950D	0	0	0	0	2.66333	4.00824
BnaC02g26030D	0	0	0	0	3.94595	0
BnaCnng41760D	0	0	0	0	2.80737	2.70886
BnaA09g04550D	0	0	0	0	2.60805	3.33619
BnaC03g33900D	0	0	0	0	2.14057	3.75592
BnaA09g15260D	0	0	0	0	2.291	2.84064
BnaC09g33280D	0	0	0	0	1.98035	3.0581
BnaA05g23330D	0	0	0	0	2.1488	3.08379
BnaC04g07070D	0	0	0	0	2.1445	3.19139
BnaC01g13370D	0	0	0	0	1.64755	3.48954
BnaA03g53730D	0	0	0	0	1.65481	3.68694
BnaC02g35980D	0	0	0	0	1.77879	3.688
BnaC03g60970D	0	0	0	0	2.44197	0
BnaA03g39450D	0	0	0	0	2.44422	0
BnaC02g22640D	0	0	0	0	2.47477	0
BnaC06g37650D	0	0	0	0	2.69975	0
BnaC06g05930D	0	0	0	0	2.87291	0
BnaC06g12460D	0	0	0	0	2.11885	1.5176
BnaA06g28070D	0	0	0	0	1.83467	1.60486
BnaC01g31340D	0	0	0	0	1.77389	1.67578
BnaA09g11070D	0	0	0	0	2.28216	1.69135
BnaCnng40210D	0	0	0	0	1.99439	1.71846
BnaC06g05910D	0	0	0	0	1.78549	1.78743
BnaC06g05920D	0	0	0	0	2.15987	1.92037
BnaC06g35790D	0	0	0	0	1.61419	2.203
BnaA03g22420D	0	0	0	0	1.85104	2.304
BnaA04g00410D	0	0	0	0	1.55708	2.50498
BnaA07g32420D	0	0	0	0	1.63548	2.90045
BnaC07g43320D	0	0	0	0	1.75777	0
BnaA08g00970D	0	0	0	0	1.78551	0
BnaC03g77080D	0	0	0	0	1.81341	0
BnaA01g29390D	0	0	0	0	1.9123	0
BnaCnng47740D	0	0	0	0	2.00711	0
BnaC03g24290D	0	0	0	0	2.09751	0
BnaC01g18570D	0	0	0	0	1.36097	1.08286
BnaC08g28520D	0	0	0	0	1.42938	1.08444
BnaA02g04080D	0	0	0	0	1.41594	1.12388
BnaC03g52080D	0	0	0	0	1.41773	1.21103
BnaA10g18700D	0	0	0	0	1.40253	1.24715
BnaC04g43540D	0	0	0	0	1.27682	1.25155
BnaA04g13570D	0	0	0	0	1.26095	1.2833
BnaA05g25600D	0	0	0	0	1.75389	1.28515
BnaCnng10920D	0	0	0	0	1.32233	1.30633
BnaC07g33400D	0	0	0	0	1.47116	1.30705
BnaA04g17100D	0	0	0	0	1.29797	1.30939
BnaA10g12460D	0	0	0	0	1.78702	1.33129
BnaC08g42940D	0	0	0	0	1.22255	1.33976
BnaC03g49860D	0	0	0	0	1.33603	1.35532
BnaC07g40860D	0	0	0	0	1.42538	1.39251
BnaC09g42430D	0	0	0	0	1.33672	1.40314
BnaC07g25000D	0	0	0	0	1.32496	1.43364
BnaC03g73490D	0	0	0	0	1.15797	1.47926
BnaC03g12050D	0	0	0	0	1.73077	1.47992
BnaA03g12500D	0	0	0	0	1.71627	1.50082
BnaCnng64970D	0	0	0	0	1.49414	1.50679
BnaA09g36860D	0	0	0	0	1.24922	1.52651
BnaA05g00790D	0	0	0	0	1.18715	1.52896
BnaC02g16530D	0	0	0	0	1.65677	1.54142
BnaC08g35060D	0	0	0	0	1.58868	1.55215
BnaA01g21220D	0	0	0	0	1.21267	1.58049
BnaC03g52210D	0	0	0	0	1.65266	1.71114
BnaA07g28470D	0	0	0	0	1.46096	1.72546
BnaC03g58140D	0	0	0	0	1.56427	1.72691
BnaC08g13120D	0	0	0	0	1.27738	1.74615
BnaA03g43580D	0	0	0	0	1.11675	1.75703
BnaC04g54340D	0	0	0	0	1.43783	1.75752
BnaC05g13120D	0	0	0	0	1.3063	1.80679
BnaCnng18530D	0	0	0	0	1.25238	1.8084
BnaA01g31320D	0	0	0	0	1.32735	1.8521
BnaC03g21720D	0	0	0	0	1.11652	1.90462
BnaA08g26630D	0	0	0	0	1.30039	1.99424
BnaC03g59660D	0	0	0	0	1.35381	2.25247
BnaA01g06120D	0	0	0	0	1.15017	0
BnaC04g11770D	0	0	0	0	1.16414	0
BnaCnng68320D	0	0	0	0	1.18613	0
BnaC01g21110D	0	0	0	0	1.20151	0
BnaA07g16850D	0	0	0	0	1.21507	0
BnaC05g01140D	0	0	0	0	1.23551	0
BnaC05g50840D	0	0	0	0	1.24544	0
BnaCnng08530D	0	0	0	0	1.25091	0
BnaC03g55440D	0	0	0	0	1.25189	0
BnaA07g19610D	0	0	0	0	1.25619	0
BnaC04g50920D	0	0	0	0	1.31451	0
BnaC07g42210D	0	0	0	0	1.32076	0
BnaC03g10000D	0	0	0	0	1.32688	0
BnaA03g36810D	0	0	0	0	1.38813	0
BnaA01g03580D	0	0	0	0	1.4061	0
BnaCnng12090D	0	0	0	0	1.47576	0
BnaC08g19190D	0	0	0	0	1.50229	0
BnaAnng26220D	0	0	0	0	1.5125	0
BnaA05g28580D	0	0	0	0	1.55161	0
BnaC03g45470D	0	0	0	0	1.55309	0
BnaC05g33170D	0	0	0	0	1.55711	0
BnaA04g10600D	0	0	0	0	1.57335	0
BnaA06g30520D	0	0	0	0	1.58193	0
BnaA06g14660D	0	0	0	0	1.60077	0
BnaC04g32870D	0	0	0	0	1.60615	0
BnaA04g11180D	0	0	0	0	1.65471	0
BnaC05g11500D	0	0	0	0	1.68105	0
BnaC08g17490D	0	0	0	0	1.70039	0
BnaA10g25550D	0	0	0	0	1.15413	1.13708
BnaC05g38860D	0	0	0	0	1.08276	1.21128
BnaC06g24500D	0	0	0	0	1.12664	1.21885
BnaA01g35910D	0	0	0	0	1.11284	1.31668
BnaC09g46280D	0	0	0	0	1.18313	1.34229
BnaC04g42420D	0	0	0	0	1.12301	1.3854
BnaA03g24410D	0	0	0	0	1.12833	1.39577
BnaC09g39490D	0	0	0	0	1.16106	1.39715
BnaAnng17540D	0	0	0	0	1.16498	1.42778
BnaA03g19320D	0	0	0	0	1.08737	1.71518
BnaA03g06680D	0	0	0	0	1.06109	1.85833
BnaAnng01320D	0	0	0	0	3.97479	4.06648
BnaC04g34700D	0	0	0	0	1.04755	0
BnaC05g11840D	0	0	0	0	0	1.93856
BnaA07g35620D	0	0	0	0	0	1.94914
BnaA10g10890D	0	0	0	0	0	1.98401
BnaA03g08910D	0	0	0	0	0	1.98469
BnaA06g03190D	0	0	0	0	0	2.0238
BnaA04g19010D	0	0	0	0	0	2.04607
BnaC03g42960D	0	0	0	0	0	2.04961
BnaA07g11880D	0	0	0	0	0	2.06199
BnaC06g32660D	0	0	0	0	0	2.06875
BnaA08g26530D	0	0	0	0	0	2.07331
BnaC05g07040D	0	0	0	0	0	2.08114
BnaCnng10250D	0	0	0	0	0	2.1084
BnaA06g09160D	0	0	0	0	0	2.12917
BnaA01g01350D	0	0	0	0	0	2.16737
BnaA09g50710D	0	0	0	0	0	2.18413
BnaC02g36630D	0	0	0	0	0	2.18952
BnaC02g08040D	0	0	0	0	0	2.19119
BnaC03g60110D	0	0	0	0	0	2.22353
BnaC08g30420D	0	0	0	0	0	2.24312
BnaA02g08060D	0	0	0	0	0	2.24846
BnaC07g50320D	0	0	0	0	0	2.26889
BnaA06g02780D	0	0	0	0	0	2.26982
BnaC01g04870D	0	0	0	0	0	2.27041
BnaC01g39540D	0	0	0	0	0	2.28645
BnaC09g12240D	0	0	0	0	0	2.30457
BnaC05g25290D	0	0	0	0	0	2.33213
BnaC07g42660D	0	0	0	0	0	2.35773
BnaCnng45270D	0	0	0	0	0	2.38151
BnaC03g16130D	0	0	0	0	0	2.39273
BnaCnng40460D	0	0	0	0	0	2.46409
BnaC03g71660D	0	0	0	0	0	2.49172
BnaC07g13850D	0	0	0	0	0	2.50324
BnaCnng34270D	0	0	0	0	0	2.55026
BnaA06g12220D	0	0	0	0	0	2.55141
BnaA09g48850D	0	0	0	0	0	2.66266
BnaA07g06850D	0	0	0	0	0	2.73254
BnaC03g06660D	0	0	0	0	0	2.77608
BnaA03g34780D	0	0	0	0	0	2.89489
BnaA01g32460D	0	0	0	0	0	2.92979
BnaCnng29240D	0	0	0	0	0	2.9954
BnaC03g36340D	0	0	0	0	0	3.00945
BnaC07g27080D	0	0	0	0	0	3.0107
BnaAnng29660D	0	0	0	0	0	3.04732
BnaC05g29600D	0	0	0	0	0	3.24769
BnaA08g05900D	0	0	0	0	0	3.2692
BnaA08g30750D	0	0	0	0	0	3.34239
BnaC03g43990D	0	0	0	0	0	3.35153
BnaC01g39620D	0	0	0	0	0	3.40704
BnaC08g39000D	0	0	0	0	0	3.49734
BnaC03g40740D	0	0	0	0	0	1.9228
BnaA06g36580D	0	0	0	0	0	1.92343
BnaC02g11170D	0	0	0	0	0	1.92704
BnaA02g03310D	0	0	0	0	0	1.92918
BnaA05g34600D	0	0	0	0	0	1.93262
BnaCnng09040D	0	0	0	0	0	1.9351
BnaA06g00920D	0	0	0	0	0	1.9372
BnaC01g08280D	0	0	0	0	0	1.93849
BnaC03g51800D	0	0	0	0	0	1.9395
BnaA04g24000D	0	0	0	0	0	1.94292
BnaA06g05290D	0	0	0	0	0	1.94565
BnaA01g29600D	0	0	0	0	0	1.94586
BnaA01g14690D	0	0	0	0	0	1.9488
BnaA09g27190D	0	0	0	0	0	1.95034
BnaA06g04160D	0	0	0	0	0	1.95324
BnaC08g25180D	0	0	0	0	0	1.9537
BnaA04g20020D	0	0	0	0	0	1.958
BnaCnng02620D	0	0	0	0	0	1.95913
BnaC07g29150D	0	0	0	0	0	1.96218
BnaA07g25980D	0	0	0	0	0	1.96248
BnaA06g09650D	0	0	0	0	0	1.96358
BnaC03g16040D	0	0	0	0	0	1.96991
BnaC03g39680D	0	0	0	0	0	1.97483
BnaA08g13980D	0	0	0	0	0	1.97557
BnaA08g04510D	0	0	0	0	0	1.98011
BnaC03g68070D	0	0	0	0	0	1.981
BnaCnng36750D	0	0	0	0	0	1.98983
BnaC07g06930D	0	0	0	0	0	1.99
BnaC09g51700D	0	0	0	0	0	1.993
BnaA06g31180D	0	0	0	0	0	1.99359
BnaC08g33450D	0	0	0	0	0	1.99735
BnaA03g34920D	0	0	0	0	0	1.99782
BnaA02g30680D	0	0	0	0	0	2.00105
BnaA03g09250D	0	0	0	0	0	2.002
BnaA10g02500D	0	0	0	0	0	2.00541
BnaC08g32020D	0	0	0	0	0	2.01013
BnaA03g36620D	0	0	0	0	0	2.01059
BnaCnng57900D	0	0	0	0	0	2.01394
BnaC04g21660D	0	0	0	0	0	2.01487
BnaC02g41110D	0	0	0	0	0	2.01936
BnaA09g19770D	0	0	0	0	0	2.01944
BnaA03g13140D	0	0	0	0	0	2.02055
BnaC05g15340D	0	0	0	0	0	2.02208
BnaA02g01140D	0	0	0	0	0	2.02261
BnaC08g48080D	0	0	0	0	0	2.02318
BnaC07g05690D	0	0	0	0	0	2.02509
BnaC04g39750D	0	0	0	0	0	2.02946
BnaC02g04270D	0	0	0	0	0	2.02994
BnaA09g40640D	0	0	0	0	0	2.02998
BnaC06g21310D	0	0	0	0	0	2.03071
BnaA06g15270D	0	0	0	0	0	2.03784
BnaA10g22470D	0	0	0	0	0	2.03806
BnaC09g51110D	0	0	0	0	0	2.03958
BnaC03g49210D	0	0	0	0	0	2.0414
BnaCnng25150D	0	0	0	0	0	2.04951
BnaC02g08550D	0	0	0	0	0	2.04972
BnaC02g00890D	0	0	0	0	0	2.05008
BnaC03g18820D	0	2.43985	0	0	0	2.05264
BnaA09g35410D	0	0	0	0	0	2.0534
BnaA05g06830D	0	0	0	0	0	2.06057
BnaC04g37870D	0	0	0	0	0	2.0635
BnaA02g28330D	0	0	0	0	0	2.06757
BnaA07g21340D	0	0	0	0	0	2.068
BnaCnng60520D	0	0	0	0	0	2.07054
BnaC06g15000D	0	0	0	0	0	2.07182
BnaC07g48220D	0	0	0	0	0	2.07236
BnaA09g07300D	0	0	0	0	0	2.0741
BnaA04g05520D	0	0	0	0	0	2.0754
BnaUnng00130D	0	0	0	0	0	2.07691
BnaC06g43160D	0	0	0	0	0	2.08172
BnaC03g09370D	0	0	0	0	0	2.08262
BnaA07g15670D	0	0	0	0	0	2.08713
BnaC03g04520D	0	0	0	0	0	2.08867
BnaA01g29640D	0	0	0	0	0	2.09428
BnaA03g27010D	0	0	0	0	0	2.09498
BnaC04g50860D	0	0	0	0	0	2.09852
BnaC06g34390D	0	0	0	0	0	2.10159
BnaC09g41120D	0	0	0	0	0	2.10535
BnaC09g41570D	0	0	0	0	0	2.10957
BnaC06g17680D	0	0	0	0	0	2.11135
BnaC01g26000D	0	0	0	0	0	2.11303
BnaC07g35060D	0	0	0	0	0	2.11402
BnaC08g45240D	0	0	0	0	0	2.121
BnaC09g46070D	0	0	0	0	0	2.12443
BnaA05g09330D	0	0	0	0	0	2.12752
BnaA01g17710D	0	0	0	0	0	2.12814
BnaCnng04500D	0	0	0	0	0	2.13452
BnaC09g36830D	0	0	0	0	0	2.13496
BnaCnng78190D	0	0	0	0	0	2.14875
BnaC08g01230D	0	0	0	0	0	2.15078
BnaC04g35770D	0	0	0	0	0	2.15554
BnaC04g44230D	0	0	0	0	0	2.16247
BnaCnng13080D	0	0	0	0	0	2.16486
BnaC08g39360D	0	0	0	0	0	2.16955
BnaCnng09890D	0	0	0	0	0	2.17126
BnaC02g05680D	0	0	0	0	0	2.17362
BnaC09g02560D	0	0	0	0	0	2.17444
BnaC04g18260D	0	0	0	0	0	2.17615
BnaC06g03670D	0	0	0	0	0	2.17796
BnaAnng37440D	0	0	0	0	0	2.17872
BnaAnng00240D	0	0	0	0	0	2.18005
BnaCnng09770D	0	0	0	0	0	2.181
BnaC06g43870D	0	0	0	0	0	2.18199
BnaA06g19390D	0	0	0	0	0	2.18203
BnaC03g76850D	0	0	0	0	0	2.19102
BnaA03g24370D	0	0	0	0	0	2.19678
BnaC01g17770D	0	0	0	0	0	2.19762
BnaA05g09010D	0	0	0	0	0	2.19991
BnaC06g36460D	0	0	0	0	0	2.21173
BnaC04g14790D	0	0	0	0	0	2.214
BnaA05g05880D	0	0	0	0	0	2.21475
BnaAnng05850D	0	0	0	0	0	2.21665
BnaAnng03730D	0	0	0	0	0	2.22094
BnaAnng36070D	0	0	0	0	0	2.22215
BnaA05g14600D	0	0	0	0	0	2.22246
BnaA09g09670D	0	0	0	0	0	2.22571
BnaCnng19190D	0	0	0	0	0	2.22941
BnaA02g09450D	0	0	0	0	0	2.23894
BnaC03g71570D	0	0	0	0	0	2.24264
BnaC06g37420D	0	0	0	0	0	2.24415
BnaA02g21750D	0	0	0	0	0	2.24489
BnaC05g13990D	0	0	0	0	0	2.2464
BnaC03g36890D	0	0	0	0	0	2.26088
BnaA06g26710D	0	0	0	0	0	2.26327
BnaA02g27870D	0	0	0	0	0	2.26573
BnaA07g03670D	0	0	0	0	0	2.27421
BnaC06g27930D	0	0	0	0	0	2.27791
BnaA04g17620D	0	0	0	0	0	2.28455
BnaA03g34230D	0	0	0	0	0	2.28475
BnaA06g39520D	0	0	0	0	0	2.29435
BnaA04g15380D	0	0	0	0	0	2.29593
BnaC08g44150D	0	0	0	0	0	2.29721
BnaC01g01450D	0	0	0	0	0	2.29766
BnaCnng02180D	0	0	0	0	0	2.30012
BnaCnng01470D	0	0	0	0	0	2.30136
BnaC08g34610D	0	0	0	0	0	2.30185
BnaA02g16050D	0	0	0	0	0	2.30423
BnaCnng64120D	0	0	0	0	0	2.30568
BnaA03g04530D	0	0	0	0	0	2.31393
BnaC03g49410D	0	0	0	0	0	2.31666
BnaA07g38040D	0	0	0	0	0	2.31813
BnaC06g02550D	0	0	0	0	0	2.33709
BnaA08g03050D	0	0	0	0	0	2.33957
BnaC05g45900D	0	0	0	0	0	2.34113
BnaC01g20970D	0	0	0	0	0	2.34227
BnaA06g31810D	0	0	0	0	0	2.3466
BnaC01g07370D	0	0	0	0	0	2.35575
BnaA06g01670D	0	0	0	0	0	2.36321
BnaC03g44180D	0	0	0	0	0	2.36416
BnaC01g10510D	0	0	0	0	0	2.36895
BnaA07g03270D	0	0	0	0	0	2.38198
BnaA01g13460D	0	0	0	0	0	2.38565
BnaC02g37250D	0	0	0	0	0	2.39111
BnaA05g03390D	0	0	0	0	0	2.39599
BnaA08g14830D	0	0	0	0	0	2.39657
BnaA04g12920D	0	0	0	0	0	2.39714
BnaUnng03420D	0	0	0	0	0	2.40147
BnaA06g26230D	0	0	0	0	0	2.40272
BnaC09g11030D	0	0	0	0	0	2.40684
BnaC05g25310D	0	0	0	0	0	2.40879
BnaC07g10580D	0	0	0	0	0	2.4093
BnaC08g44600D	0	0	0	0	0	2.41814
BnaA05g16820D	0	0	0	0	0	2.42195
BnaC03g48670D	0	0	0	0	0	2.42213
BnaC05g05720D	0	0	0	0	0	2.43211
BnaC07g03580D	0	0	0	0	0	2.44338
BnaAnng11660D	0	0	0	0	0	2.4474
BnaA05g35860D	0	0	0	0	0	2.4501
BnaA02g26420D	0	0	0	0	0	2.45268
BnaA04g20050D	0	0	0	0	0	2.45877
BnaA03g50120D	0	0	0	0	0	2.46497
BnaA03g25640D	0	0	0	0	0	2.47545
BnaC03g05060D	0	0	0	0	0	2.47633
BnaA09g32940D	0	0	0	0	0	2.48611
BnaA06g32540D	0	0	0	0	0	2.48715
BnaC08g17050D	0	0	0	0	0	2.49978
BnaC03g60170D	0	0	0	0	0	2.50525
BnaC04g16900D	0	0	0	0	0	2.50796
BnaC07g20260D	0	0	0	0	0	2.51407
BnaA07g33590D	0	0	0	0	0	2.51538
BnaA05g16170D	0	0	0	0	0	2.5155
BnaA05g12340D	0	0	0	0	0	2.51561
BnaAnng31050D	0	0	0	0	0	2.51829
BnaC07g28690D	0	0	0	0	0	2.51847
BnaA03g30760D	0	0	0	0	0	2.5195
BnaC03g01440D	0	0	0	0	0	2.51985
BnaA10g03670D	0	0	0	0	0	2.52261
BnaA05g34180D	0	0	0	0	0	2.52668
BnaC03g64870D	0	0	0	0	0	2.52671
BnaC08g44210D	0	0	0	0	0	2.52783
BnaC06g01580D	0	0	0	0	0	2.53286
BnaA01g11800D	0	0	0	0	0	2.54539
BnaC07g42580D	0	0	0	0	0	2.55192
BnaC03g16220D	0	0	0	0	0	2.55376
BnaA05g23860D	0	0	0	0	0	2.55386
BnaC05g11890D	0	0	0	0	0	2.56636
BnaA09g31690D	0	0	0	0	0	2.57477
BnaC03g07650D	0	0	0	0	0	2.57533
BnaC06g38200D	0	0	0	0	0	2.57675
BnaA09g42180D	0	0	0	0	0	2.58262
BnaC05g12500D	0	0	0	0	0	2.58722
BnaA09g32240D	0	0	0	0	0	2.58774
BnaA09g48570D	0	0	0	0	0	2.60147
BnaC09g09080D	0	0	0	0	0	2.60289
BnaC03g06070D	0	0	0	0	0	2.60477
BnaC07g43260D	0	0	0	0	0	2.61332
BnaC02g36400D	0	0	0	0	0	2.62521
BnaA03g50190D	0	0	0	0	0	2.63181
BnaC03g01910D	0	0	0	0	0	2.63571
BnaA03g24970D	0	0	0	0	0	2.6383
BnaA02g18370D	0	0	0	0	0	2.6396
BnaA01g34180D	0	0	0	0	0	2.64707
BnaA03g12050D	0	0	0	0	0	2.64958
BnaA05g33400D	0	0	0	0	0	2.65325
BnaC09g08170D	0	0	0	0	0	2.65855
BnaA07g19910D	0	0	0	0	0	2.66611
BnaCnng19230D	0	0	0	0	0	2.67831
BnaA01g20660D	0	0	0	0	0	2.68042
BnaC09g43980D	0	0	0	0	0	2.68665
BnaA01g12020D	0	0	0	0	0	2.68765
BnaA09g41080D	0	0	0	0	0	2.70077
BnaC07g35830D	0	0	0	0	0	2.7008
BnaA01g28970D	0	0	0	0	0	2.70672
BnaUnng02380D	0	0	0	0	0	2.71225
BnaCnng76140D	0	0	0	0	0	2.71875
BnaCnng66250D	0	0	0	0	0	2.71967
BnaA01g13950D	0	0	0	0	0	2.7239
BnaCnng13690D	0	0	0	0	0	2.72418
BnaAnng34060D	0	0	0	0	0	2.74416
BnaA06g40890D	0	0	0	0	0	2.75057
BnaA07g36520D	0	0	0	0	0	2.75536
BnaC09g16770D	0	0	0	0	0	2.76244
BnaAnng31310D	0	0	0	0	0	2.76523
BnaC07g30740D	0	0	0	0	0	2.77607
BnaC07g35670D	0	0	0	0	0	2.77754
BnaCnng53390D	0	0	0	0	0	2.78091
BnaA01g18050D	0	0	0	0	0	2.78093
BnaA06g23810D	0	0	0	0	0	2.79531
BnaCnng03640D	0	0	0	0	0	2.79538
BnaA04g10460D	0	0	0	0	0	2.80112
BnaC06g09830D	0	0	0	0	0	2.80217
BnaC06g41560D	0	0	0	0	0	2.81543
BnaA06g40760D	0	0	0	0	0	2.82059
BnaC03g43300D	0	0	0	0	0	2.83143
BnaC06g42250D	0	0	0	0	0	2.83244
BnaC06g26450D	0	0	0	0	0	2.8587
BnaC03g53090D	0	0	0	0	0	2.86035
BnaA01g19350D	0	0	0	0	0	2.86138
BnaA06g10760D	0	0	0	0	0	2.86286
BnaC02g21070D	0	0	0	0	0	2.86431
BnaC05g20880D	0	0	0	0	0	2.87264
BnaA03g15020D	0	0	0	0	0	2.87281
BnaA03g13650D	0	0	0	0	0	2.87295
BnaA02g35710D	0	0	0	0	0	2.87699
BnaC03g20240D	0	0	0	0	0	2.87819
BnaCnng47320D	0	0	0	0	0	2.9059
BnaCnng45350D	0	0	0	0	0	2.90644
BnaC09g12360D	0	0	0	0	0	2.9124
BnaA09g23770D	0	0	0	0	0	2.91717
BnaA06g12450D	0	0	0	0	0	2.91727
BnaC06g30120D	0	0	0	0	0	2.92565
BnaC09g42730D	0	0	0	0	0	2.93736
BnaA06g27460D	0	0	0	0	0	2.93824
BnaC09g18260D	0	0	0	0	0	2.94332
BnaA07g13160D	0	0	0	0	0	2.95239
BnaA10g27610D	0	0	0	0	0	2.9668
BnaA05g34930D	0	0	0	0	0	2.96692
BnaC03g67380D	0	0	0	0	0	2.98231
BnaA08g02780D	0	0	0	0	0	2.99443
BnaAnng12900D	0	0	0	0	0	3.00551
BnaC04g28680D	0	0	0	0	0	3.01194
BnaA03g34740D	0	0	0	0	0	3.02161
BnaA09g45510D	0	0	0	0	0	3.04399
BnaCnng17350D	0	0	0	0	0	3.06778
BnaAnng09680D	0	0	0	0	0	3.08497
BnaA06g18900D	0	0	0	0	0	3.08966
BnaC06g24090D	0	0	0	0	0	3.11707
BnaC02g23840D	0	0	0	0	0	3.12424
BnaA03g06440D	0	0	0	0	0	3.12706
BnaC03g66890D	0	0	0	0	0	3.12896
BnaC03g06020D	0	0	0	0	0	3.14717
BnaCnng23550D	0	0	0	0	0	3.17194
BnaC07g01900D	0	0	0	0	0	3.19009
BnaCnng48520D	0	0	0	0	0	3.19081
BnaCnng12780D	0	0	0	0	0	3.19086
BnaAnng05710D	0	0	0	0	0	3.19227
BnaA09g33470D	0	0	0	0	0	3.19884
BnaA02g05700D	0	0	0	0	0	3.21901
BnaCnng12510D	0	0	0	0	0	3.21905
BnaC07g17600D	0	0	0	0	0	3.22421
BnaC05g25320D	0	0	0	0	0	3.25014
BnaC06g31870D	0	0	0	0	0	3.25068
BnaC08g17710D	0	0	0	0	0	3.25632
BnaA03g31030D	0	0	0	0	0	3.26304
BnaC01g22900D	0	0	0	0	0	3.27636
BnaA06g29680D	0	0	0	0	0	3.2764
BnaA06g13700D	0	0	0	0	0	3.28018
BnaCnng23250D	0	0	0	0	0	3.29638
BnaC04g04210D	0	0	0	0	0	3.30386
BnaCnng52180D	0	0	0	0	0	3.31119
BnaA04g02380D	0	0	0	0	0	3.31743
BnaA07g28440D	0	0	0	0	0	3.32283
BnaC01g36330D	0	0	0	0	0	3.32758
BnaA09g11970D	0	0	0	0	0	3.34035
BnaC05g09770D	0	0	0	0	0	3.34114
BnaA07g28820D	0	0	0	0	0	3.3433
BnaA10g19040D	0	0	0	0	0	3.34448
BnaA07g25640D	0	0	0	0	0	3.35694
BnaAnng32670D	0	0	0	0	0	3.37173
BnaC05g14980D	0	0	0	0	0	3.37325
BnaC03g32580D	0	0	0	0	0	3.37619
BnaA02g19720D	0	0	0	0	0	3.3803
BnaC02g10050D	0	0	0	0	0	3.3891
BnaA01g03620D	0	0	0	0	0	3.39645
BnaA07g23430D	0	0	0	0	0	3.39967
BnaC01g39520D	0	0	0	0	0	3.40666
BnaC04g45500D	0	0	0	0	0	3.42423
BnaA08g13860D	0	0	0	0	0	3.44279
BnaC05g50940D	0	0	0	0	0	3.45052
BnaA09g17060D	0	0	0	0	0	3.48538
BnaA08g14900D	0	0	0	0	0	3.48755
BnaC07g41280D	0	0	0	0	0	3.54347
BnaAnng26570D	0	0	0	0	0	3.59303
BnaCnng53700D	0	0	0	0	0	3.65396
BnaA08g11370D	0	0	0	0	0	3.66729
BnaC05g02810D	0	0	0	0	0	1.25251
BnaA06g35630D	0	0	0	0	0	1.25305
BnaA02g36490D	0	0	0	0	0	1.25341
BnaC05g00460D	0	0	0	0	0	1.25431
BnaA01g03200D	0	0	0	0	0	1.25531
BnaC03g52250D	0	0	0	0	0	1.25574
BnaA01g20450D	0	0	0	0	0	1.25587
BnaC08g34170D	0	0	0	0	0	1.25653
BnaA06g03070D	0	0	0	0	0	1.25698
BnaA08g22060D	0	0	0	0	0	1.25728
BnaA09g48250D	0	0	0	0	0	1.25767
BnaAnng22500D	0	0	0	0	0	1.25789
BnaC09g50570D	0	0	0	0	0	1.25926
BnaC01g32640D	0	0	0	0	0	1.26039
BnaC07g27870D	0	0	0	0	0	1.26042
BnaA06g39430D	0	0	0	0	0	1.26072
BnaC01g07700D	0	0	0	0	0	1.26101
BnaC08g25640D	0	0	0	0	0	1.26105
BnaC07g50110D	0	0	0	0	0	1.26194
BnaC01g06320D	0	0	0	0	0	1.26199
BnaA08g14670D	0	0	0	0	0	1.26216
BnaC07g03480D	0	0	0	0	0	1.26315
BnaC05g51160D	0	0	0	0	0	1.26345
BnaC09g34020D	0	0	0	0	0	1.2637
BnaA09g34280D	0	0	0	0	0	1.26428
BnaC03g76260D	0	0	0	0	0	1.26428
BnaC01g12590D	0	0	0	0	0	1.26451
BnaC02g27560D	0	0	0	0	0	1.26503
BnaA01g06150D	0	0	0	0	0	1.26547
BnaC05g06780D	0	0	0	0	0	1.26643
BnaA01g14270D	0	0	0	0	0	1.26656
BnaAnng17350D	0	0	0	0	0	1.26683
BnaC04g02360D	0	0	0	0	0	1.26685
BnaA07g32020D	0	0	0	0	0	1.26742
BnaC05g33790D	0	0	0	0	0	1.26756
BnaC04g06760D	0	0	0	0	0	1.2684
BnaA01g03050D	0	0	0	0	0	1.26936
BnaA10g15220D	0	0	0	0	0	1.27007
BnaA03g42110D	0	0	0	0	0	1.27244
BnaC09g05340D	0	0	0	0	0	1.27384
BnaA08g23110D	0	0	0	0	0	1.27526
BnaA01g00730D	0	0	0	0	0	1.27557
BnaAnng12480D	0	0	0	0	0	1.27574
BnaC03g36350D	0	0	0	0	0	1.27691
BnaC05g18130D	0	0	0	0	0	1.27691
BnaC01g19020D	0	0	0	0	0	1.27704
BnaA06g25920D	0	0	0	0	0	1.27803
BnaA03g57170D	0	0	0	0	0	1.27832
BnaA02g19290D	0	0	0	0	0	1.28032
BnaAnng15100D	0	0	0	0	0	1.28218
BnaC03g28080D	0	0	0	0	0	1.28235
BnaA04g13390D	0	0	0	0	0	1.28292
BnaA05g33520D	0	0	0	0	0	1.28352
BnaC04g11790D	0	0	0	0	0	1.28362
BnaA03g50840D	0	0	0	0	0	1.28437
BnaA09g25400D	0	0	0	0	0	1.28485
BnaC03g13760D	0	0	0	0	0	1.2853
BnaC01g28530D	0	0	0	0	0	1.28608
BnaCnng49870D	0	0	0	0	0	1.2871
BnaA08g28750D	0	0	0	0	0	1.2872
BnaC07g24460D	0	0	0	0	0	1.28763
BnaC03g28800D	0	0	0	0	0	1.28779
BnaA10g00170D	0	0	0	0	0	1.28792
BnaA01g01360D	0	0	0	0	0	1.28809
BnaC04g31360D	0	0	0	0	0	1.28903
BnaC03g36700D	0	0	0	0	0	1.2902
BnaC01g21340D	0	0	0	0	0	1.2918
BnaA03g32080D	0	0	0	0	0	1.29199
BnaA09g42590D	0	0	0	0	0	1.29199
BnaC09g44540D	0	0	0	0	0	1.2924
BnaCnng58510D	0	0	0	0	0	1.29384
BnaA02g05290D	0	0	0	0	0	1.29418
BnaA09g01250D	0	0	0	0	0	1.29432
BnaC05g44540D	0	0	0	0	0	1.29517
BnaCnng30840D	0	0	0	0	0	1.2952
BnaA01g09940D	0	0	0	0	0	1.29615
BnaC09g07340D	0	0	0	0	0	1.29757
BnaC05g00240D	0	0	0	0	0	1.29776
BnaA01g08680D	0	0	0	0	0	1.29896
BnaC04g15750D	0	0	0	0	0	1.2995
BnaC09g48560D	0	0	0	0	0	1.29991
BnaC06g19600D	0	0	0	0	0	1.3
BnaA02g24990D	0	0	0	0	0	1.3001
BnaC09g38410D	0	0	0	0	0	1.30017
BnaA03g20780D	0	0	0	0	0	1.30161
BnaA04g19880D	0	0	0	0	0	1.30235
BnaC05g00420D	0	0	0	0	0	1.30352
BnaA03g38050D	0	0	0	0	0	1.30358
BnaC02g21670D	0	0	0	0	0	1.30425
BnaA03g03110D	0	0	0	0	0	1.30682
BnaA03g42330D	0	0	0	0	0	1.30705
BnaA09g15320D	0	0	0	0	0	1.30829
BnaA06g15400D	0	0	0	0	0	1.30905
BnaC04g29410D	0	0	0	0	0	1.30964
BnaA09g26270D	0	0	0	0	0	1.3102
BnaCnng11120D	0	0	0	0	0	1.31034
BnaC02g45740D	0	0	0	0	0	1.31043
BnaA03g35980D	0	0	0	0	0	1.31052
BnaC09g18810D	0	0	0	0	0	1.31056
BnaC06g25830D	0	0	0	0	0	1.31071
BnaA08g02470D	0	0	0	0	0	1.31112
BnaA05g22990D	0	0	0	0	0	1.31275
BnaA04g00440D	0	0	0	0	0	1.3135
BnaC09g51740D	0	0	0	0	0	1.3137
BnaA06g17170D	0	0	0	0	0	1.31654
BnaC03g71890D	0	0	0	0	0	1.31735
BnaC01g04390D	0	0	0	0	0	1.31742
BnaAnng07030D	0	0	0	0	0	1.31814
BnaC03g70460D	0	0	0	0	0	1.31827
BnaC05g41950D	0	0	0	0	0	1.31828
BnaC04g38520D	0	0	0	0	0	1.31844
BnaC03g31970D	0	0	0	0	0	1.31892
BnaC09g48570D	0	0	0	0	0	1.31945
BnaA05g01650D	0	0	0	0	0	1.32008
BnaC08g06550D	0	0	0	0	0	1.32129
BnaC04g50930D	0	0	0	0	0	1.32183
BnaC03g14720D	0	0	0	0	0	1.32381
BnaC05g21240D	0	0	0	0	0	1.32382
BnaC01g09820D	0	0	0	0	0	1.32441
BnaC09g02930D	0	0	0	0	0	1.32566
BnaA01g01340D	0	0	0	0	0	1.32617
BnaAnng21710D	0	0	0	0	0	1.32685
BnaA05g07300D	0	0	0	0	0	1.32766
BnaC07g38780D	0	0	0	0	0	1.32865
BnaA06g00400D	0	0	0	0	0	1.32971
BnaC05g05570D	0	0	0	0	0	1.33091
BnaA03g05930D	0	0	0	0	0	1.3315
BnaC05g11520D	0	0	0	0	0	1.33167
BnaC04g52100D	0	0	0	0	0	1.33295
BnaA05g04540D	0	0	0	0	0	1.33296
BnaC08g11140D	0	0	0	0	0	1.33403
BnaA04g09420D	0	0	0	0	0	1.3341
BnaC09g47040D	0	0	0	0	0	1.33431
BnaA06g37970D	0	0	0	0	0	1.33485
BnaA07g04370D	0	0	0	0	0	1.33491
BnaC08g43760D	0	0	0	0	0	1.33637
BnaAnng25360D	0	0	0	0	0	1.33648
BnaA01g07330D	0	0	0	0	0	1.33677
BnaC09g38440D	0	0	0	0	0	1.33711
BnaC04g01060D	0	0	0	0	0	1.33715
BnaC05g12920D	0	0	0	0	0	1.33735
BnaCnng57490D	0	0	0	0	0	1.33785
BnaC06g17360D	0	0	0	0	0	1.33941
BnaA09g35590D	0	0	0	0	0	1.34007
BnaC04g49800D	0	0	0	0	0	1.3408
BnaA01g01910D	0	0	0	0	0	1.34096
BnaA02g19860D	0	0	0	0	0	1.34138
BnaC03g07000D	0	0	0	0	0	1.34174
BnaA02g13100D	0	0	0	0	0	1.34281
BnaA09g54780D	0	0	0	0	0	1.3429
BnaA07g37590D	0	0	0	0	0	1.34311
BnaA07g03740D	0	0	0	0	0	1.34342
BnaA07g32210D	0	0	0	0	0	1.34345
BnaC07g15950D	0	0	0	0	0	1.34535
BnaC03g21930D	0	0	0	0	0	1.34557
BnaC04g00430D	0	0	0	0	0	1.34609
BnaC05g48120D	0	0	0	0	0	1.34798
BnaA06g22800D	0	0	0	0	0	1.34849
BnaC09g09070D	0	0	0	0	0	1.34983
BnaA09g01310D	0	0	0	0	0	1.35056
BnaA03g20210D	0	0	0	0	0	1.35158
BnaA03g51900D	0	0	0	0	0	1.3517
BnaC02g41040D	0	0	0	0	0	1.35191
BnaA08g28350D	0	0	0	0	0	1.3526
BnaCnng06060D	0	0	0	0	0	1.35275
BnaC04g08100D	0	0	0	0	0	1.35276
BnaC06g05350D	0	0	0	0	0	1.35322
BnaC05g33690D	0	0	0	0	0	1.3533
BnaA09g27350D	0	0	0	0	0	1.35487
BnaC07g22100D	0	0	0	0	0	1.35612
BnaC05g44140D	0	0	0	0	0	1.35682
BnaA06g35560D	0	0	0	0	0	1.35862
BnaC06g39200D	0	0	0	0	0	1.3611
BnaC05g00450D	0	0	0	0	0	1.36133
BnaA02g19410D	0	0	0	0	0	1.3626
BnaA01g09480D	0	0	0	0	0	1.3628
BnaC08g27590D	0	0	0	0	0	1.36456
BnaC02g01070D	0	0	0	0	0	1.36487
BnaA03g56650D	0	0	0	0	0	1.36505
BnaC06g27650D	0	0	0	0	0	1.36591
BnaC02g43960D	0	0	0	0	0	1.3664
BnaC05g49490D	0	0	0	0	0	1.36743
BnaA04g29490D	0	0	0	0	0	1.36767
BnaA08g20730D	0	0	0	0	0	1.36843
BnaC01g38510D	0	0	0	0	0	1.3688
BnaC04g42550D	0	0	0	0	0	1.36898
BnaC07g38560D	0	0	0	0	0	1.37093
BnaC06g01160D	0	0	0	0	0	1.37105
BnaA01g35710D	0	0	0	0	0	1.37248
BnaC04g52580D	0	0	0	0	0	1.37359
BnaA09g49660D	0	0	0	0	0	1.37415
BnaC01g43040D	0	0	0	0	0	1.37417
BnaC04g10990D	0	0	0	0	0	1.37417
BnaC01g33110D	0	0	0	0	0	1.37769
BnaC04g14080D	0	0	0	0	0	1.38056
BnaC02g07050D	0	0	0	0	0	1.38058
BnaA09g51190D	0	0	0	0	0	1.3809
BnaC02g40790D	0	0	0	0	0	1.38334
BnaA09g31620D	0	0	0	0	0	1.38429
BnaC04g45430D	0	0	0	0	0	1.38459
BnaA01g17560D	0	0	0	0	0	1.38552
BnaC04g36140D	0	0	0	0	0	1.38652
BnaC04g24980D	0	0	0	0	0	1.38835
BnaC03g29100D	0	0	0	0	0	1.38878
BnaA08g04360D	0	0	0	0	0	1.3892
BnaC08g32010D	0	0	0	0	0	1.38969
BnaA07g21530D	0	0	0	0	0	1.39017
BnaC06g42780D	0	0	0	0	0	1.39284
BnaA10g22750D	0	0	0	0	0	1.39339
BnaC07g22990D	0	0	0	0	0	1.39351
BnaC09g31380D	0	0	0	0	0	1.3938
BnaA03g31960D	0	0	0	0	0	1.39546
BnaA03g30060D	0	0	0	0	0	1.39594
BnaCnng06680D	0	0	0	0	0	1.39643
BnaA05g27460D	0	0	0	0	0	1.39688
BnaC06g26320D	0	0	0	0	0	1.39769
BnaA08g18750D	0	0	0	0	0	1.39773
BnaA10g29520D	0	0	0	0	0	1.39843
BnaC04g07090D	0	0	0	0	0	1.39944
BnaC05g02100D	0	0	0	0	0	1.39945
BnaC04g02990D	0	0	0	0	0	1.3996
BnaC07g31080D	0	0	0	0	0	1.40143
BnaC04g36570D	0	0	0	0	0	1.40207
BnaC09g38370D	0	0	0	0	0	1.4023
BnaC01g26640D	0	0	0	0	0	1.40234
BnaC05g07350D	0	0	0	0	0	1.40374
BnaA09g12290D	0	0	0	0	0	1.40521
BnaA09g45580D	0	0	0	0	0	1.40691
BnaC06g36810D	0	0	0	0	0	1.40706
BnaC08g17560D	0	0	0	0	0	1.40783
BnaA09g39240D	0	0	0	0	0	1.40878
BnaC02g05800D	0	0	0	0	0	1.40895
BnaA02g18470D	0	0	0	0	0	1.40913
BnaCnng05580D	0	0	0	0	0	1.40947
BnaA08g01170D	0	0	0	0	0	1.41001
BnaC07g17390D	0	0	0	0	0	1.41024
BnaA06g01060D	0	0	0	0	0	1.41026
BnaC09g47970D	0	0	0	0	0	1.41039
BnaA03g19140D	0	0	0	0	0	1.41195
BnaC07g08240D	0	0	0	0	0	1.41238
BnaC03g38870D	0	0	0	0	0	1.41323
BnaCnng19430D	0	0	0	0	0	1.41333
BnaC08g26820D	0	0	0	0	0	1.41359
BnaC05g47780D	0	0	0	0	0	1.41377
BnaA06g12810D	0	0	0	0	0	1.41384
BnaCnng04240D	0	0	0	0	0	1.4151
BnaA09g39530D	0	0	0	0	0	1.41519
BnaC03g50700D	0	0	0	0	0	1.41583
BnaA08g22920D	0	0	0	0	0	1.41612
BnaC05g05330D	0	0	0	0	0	1.41764
BnaA04g22550D	0	0	0	0	0	1.41876
BnaC05g51350D	0	0	0	0	0	1.41921
BnaAnng07530D	0	0	0	0	0	1.41952
BnaC04g02450D	0	0	0	0	0	1.41979
BnaA09g15970D	0	0	0	0	0	1.42349
BnaA09g34120D	0	0	0	0	0	1.42396
BnaA10g20190D	0	0	0	0	0	1.42408
BnaA09g03960D	0	0	0	0	0	1.42447
BnaA06g13080D	0	0	0	0	0	1.42565
BnaC09g48580D	0	0	0	0	0	1.42573
BnaC07g11630D	0	0	0	0	0	1.42592
BnaA01g05960D	0	0	0	0	0	1.42672
BnaC09g46870D	0	0	0	0	0	1.42798
BnaA01g15130D	0	0	0	0	0	1.42826
BnaC09g11190D	0	0	0	0	0	1.4286
BnaC04g11110D	0	0	0	0	0	1.43124
BnaA09g56490D	0	0	0	0	0	1.43149
BnaCnng06580D	0	0	0	0	0	1.43299
BnaC04g39630D	0	0	0	0	0	1.43326
BnaC07g43650D	0	0	0	0	0	1.43346
BnaA01g36950D	0	0	0	0	0	1.43517
BnaA05g02180D	0	0	0	0	0	1.43561
BnaC04g05050D	0	0	0	0	0	1.43674
BnaCnng29270D	0	0	0	0	0	1.43713
BnaC01g03050D	0	0	0	0	0	1.43741
BnaC08g37500D	0	0	0	0	0	1.43767
BnaC01g38380D	0	0	0	0	0	1.43909
BnaC06g05840D	0	0	0	0	0	1.44029
BnaC03g31140D	0	0	0	0	0	1.44055
BnaA05g21020D	0	0	0	0	0	1.4409
BnaA03g41040D	0	0	0	0	0	1.44171
BnaC01g16120D	0	0	0	0	0	1.44306
BnaC04g50310D	0	0	0	0	0	1.44312
BnaC07g46250D	0	0	0	0	0	1.44416
BnaC01g04620D	0	0	0	0	0	1.44438
BnaC04g52230D	0	0	0	0	0	1.44669
BnaA02g10970D	0	0	0	0	0	1.44772
BnaA05g06880D	0	0	0	0	0	1.44859
BnaC05g03020D	0	0	0	0	0	1.44873
BnaC07g32860D	0	0	0	0	0	1.44921
BnaC01g12800D	0	0	0	0	0	1.44962
BnaC02g12950D	0	0	0	0	0	1.45522
BnaA06g14220D	0	0	0	0	0	1.45557
BnaC07g06580D	0	0	0	0	0	1.45595
BnaC05g44610D	0	0	0	0	0	1.45607
BnaC06g36580D	0	0	0	0	0	1.45779
BnaA01g02530D	0	0	0	0	0	1.45994
BnaC05g03010D	0	0	0	0	0	1.46016
BnaC07g19470D	0	0	0	0	0	1.4623
BnaC07g13840D	0	0	0	0	0	1.46263
BnaCnng36160D	0	0	0	0	0	1.46284
BnaA06g32440D	0	0	0	0	0	1.46388
BnaA01g14080D	0	0	0	0	0	1.46526
BnaA02g35050D	0	0	0	0	0	1.4661
BnaA05g24930D	0	0	0	0	0	1.46641
BnaC03g67710D	0	0	0	0	0	1.47029
BnaA10g11080D	0	0	0	0	0	1.47145
BnaC08g37780D	0	0	0	0	0	1.47235
BnaC02g37590D	0	0	0	0	0	1.47242
BnaA09g48160D	0	0	0	0	0	1.47318
BnaA05g22400D	0	0	0	0	0	1.47322
BnaAnng25490D	0	0	0	0	0	1.47336
BnaC03g09860D	0	0	0	0	0	1.47377
BnaA03g13550D	0	0	0	0	0	1.47424
BnaA10g10190D	0	0	0	0	0	1.47441
BnaAnng41650D	0	0	0	0	0	1.47521
BnaC09g49610D	0	0	0	0	0	1.47528
BnaA06g07220D	0	0	0	0	0	1.47554
BnaC02g37740D	0	0	0	0	0	1.47626
BnaA04g29680D	0	0	0	0	0	1.47814
BnaA08g28190D	0	0	0	0	0	1.479
BnaC06g22310D	0	0	0	0	0	1.48486
BnaCnng58360D	0	0	0	0	0	1.48515
BnaCnng52390D	0	0	0	0	0	1.4881
BnaC03g50820D	0	0	0	0	0	1.48866
BnaA08g27280D	0	0	0	0	0	1.48873
BnaA08g06260D	0	0	0	0	0	1.4896
BnaC06g22050D	0	0	0	0	0	1.49433
BnaA03g45700D	0	0	0	0	0	1.49448
BnaA01g30490D	0	0	0	0	0	1.4945
BnaA09g45520D	0	0	0	0	0	1.49583
BnaA03g24240D	0	0	0	0	0	1.49618
BnaA05g12100D	0	0	0	0	0	1.497
BnaC09g53480D	0	0	0	0	0	1.4975
BnaA10g28610D	0	0	0	0	0	1.49804
BnaCnng19200D	0	0	0	0	0	1.49886
BnaC03g43680D	0	0	0	0	0	1.49983
BnaC04g54510D	0	0	0	0	0	1.50164
BnaC05g31560D	0	0	0	0	0	1.50384
BnaA09g30490D	0	0	0	0	0	1.50406
BnaC04g21990D	0	0	0	0	0	1.50462
BnaC01g00540D	0	0	0	0	0	1.50597
BnaA05g35030D	0	0	0	0	0	1.50751
BnaC06g30040D	0	0	0	0	0	1.51037
BnaC04g05740D	0	0	0	0	0	1.5111
BnaCnng01360D	0	0	0	0	0	1.51317
BnaA10g18410D	0	0	0	0	0	1.51469
BnaA02g33520D	0	0	0	0	0	1.51598
BnaAnng15990D	0	0	0	0	0	1.51638
BnaA06g19660D	0	0	0	0	0	1.52018
BnaC05g31250D	0	0	0	0	0	1.52162
BnaA06g27590D	0	0	0	0	0	1.52276
BnaA05g30860D	0	0	0	0	0	1.52396
BnaA09g54290D	0	0	0	0	0	1.52501
BnaA02g06460D	0	0	0	0	0	1.52512
BnaAnng13520D	0	0	0	0	0	1.52549
BnaC01g02130D	0	0	0	0	0	1.52574
BnaA07g38610D	0	0	0	0	0	1.5272
BnaC01g04180D	0	0	0	0	0	1.52739
BnaCnng73250D	0	0	0	0	0	1.52783
BnaC03g25530D	0	0	0	0	0	1.5283
BnaC09g25140D	0	0	0	0	0	1.52931
BnaC09g22400D	0	0	0	0	0	1.53029
BnaC08g35970D	0	0	0	0	0	1.53123
BnaA01g35420D	0	0	0	0	0	1.53263
BnaA10g17890D	0	0	0	0	0	1.53293
BnaA06g15610D	0	0	0	0	0	1.53386
BnaA06g09170D	0	0	0	0	0	1.53502
BnaA09g28000D	0	0	0	0	0	1.53661
BnaC09g41010D	0	0	0	0	0	1.53872
BnaA07g05850D	0	0	0	0	0	1.53966
BnaC07g21770D	0	0	0	0	0	1.54178
BnaC02g04420D	0	0	0	0	0	1.5419
BnaA06g06150D	0	0	0	0	0	1.54381
BnaA03g17520D	0	0	0	0	0	1.54383
BnaC03g14710D	0	0	0	0	0	1.54641
BnaCnng33370D	0	0	0	0	0	1.5515
BnaA01g21510D	0	0	0	0	0	1.55198
BnaC01g30100D	0	0	0	0	0	1.55225
BnaC07g04210D	0	0	0	0	0	1.55369
BnaA05g25570D	0	0	0	0	0	1.55444
BnaC06g05650D	0	0	0	0	0	1.55633
BnaC05g09390D	0	0	0	0	0	1.55653
BnaC05g03430D	0	0	0	0	0	1.55829
BnaAnng03740D	0	0	0	0	0	1.55865
BnaC05g46550D	0	0	0	0	0	1.55934
BnaC07g26120D	0	0	0	0	0	1.5603
BnaA03g50240D	0	0	0	0	0	1.56095
BnaA01g18740D	0	0	0	0	0	1.56102
BnaA04g15520D	0	0	0	0	0	1.56145
BnaA09g00480D	0	0	0	0	0	1.5621
BnaC02g43080D	0	0	0	0	0	1.56436
BnaC03g00120D	0	0	0	0	0	1.56472
BnaA07g29460D	0	0	0	0	0	1.56487
BnaC09g02380D	0	0	0	0	0	1.56606
BnaCnng18810D	0	0	0	0	0	1.56625
BnaC04g10730D	0	0	0	0	0	1.569
BnaA05g26120D	0	0	0	0	0	1.56947
BnaC03g36390D	0	0	0	0	0	1.56998
BnaA09g56660D	0	0	0	0	0	1.57111
BnaCnng23020D	0	0	0	0	0	1.57128
BnaCnng49530D	0	0	0	0	0	1.57141
BnaC01g08040D	0	0	0	0	0	1.57146
BnaAnng16720D	0	0	0	0	0	1.57189
BnaA08g12600D	0	0	0	0	0	1.57233
BnaC07g35500D	0	0	0	0	0	1.57301
BnaA05g33510D	0	0	0	0	0	1.57356
BnaA03g03680D	0	0	0	0	0	1.5757
BnaA04g29560D	0	0	0	0	0	1.57599
BnaAnng13240D	0	0	0	0	0	1.57637
BnaA07g35640D	0	0	0	0	0	1.57759
BnaAnng42010D	0	0	0	0	0	1.57963
BnaA05g10200D	0	0	0	0	0	1.58012
BnaA03g07830D	0	0	0	0	0	1.58066
BnaA05g25380D	0	0	0	0	0	1.58211
BnaC03g57180D	0	0	0	0	0	1.58237
BnaA09g51970D	0	0	0	0	0	1.58281
BnaA07g22900D	0	0	0	0	0	1.58304
BnaA03g15610D	0	0	0	0	0	1.58559
BnaA03g57630D	0	0	0	0	0	1.58864
BnaC03g21580D	0	0	0	0	0	1.58894
BnaC02g00470D	0	0	0	0	0	1.5894
BnaA07g18050D	0	0	0	0	0	1.58961
BnaA08g17820D	0	0	0	0	0	1.59057
BnaA10g17050D	0	0	0	0	0	1.59402
BnaA09g18190D	0	0	0	0	0	1.59473
BnaC01g36080D	0	0	0	0	0	1.59586
BnaC09g15940D	0	0	0	0	0	1.59602
BnaA06g32060D	0	0	0	0	0	1.59793
BnaCnng49470D	0	0	0	0	0	1.59893
BnaC04g40450D	0	0	0	0	0	1.60072
BnaA08g05730D	0	0	0	0	0	1.60143
BnaA06g24870D	0	0	0	0	0	1.60274
BnaC04g23510D	0	0	0	0	0	1.60608
BnaA10g15800D	0	0	0	0	0	1.60624
BnaCnng52400D	0	0	0	0	0	1.60629
BnaC08g38360D	0	0	0	0	0	1.60718
BnaA07g20320D	0	0	0	0	0	1.60822
BnaCnng25880D	0	0	0	0	0	1.60837
BnaC03g57570D	0	0	0	0	0	1.60912
BnaAnng26590D	0	0	0	0	0	1.60947
BnaC09g26860D	0	0	0	0	0	1.61233
BnaA04g17470D	0	0	0	0	0	1.61427
BnaC03g59270D	0	0	0	0	0	1.6146
BnaA09g08790D	0	0	0	0	0	1.61491
BnaC07g29460D	0	0	0	0	0	1.6164
BnaA01g06140D	0	0	0	0	0	1.61692
BnaC02g15270D	0	0	0	0	0	1.61916
BnaA04g21260D	0	0	0	0	0	1.6196
BnaA07g35030D	0	0	0	0	0	1.62031
BnaC01g17890D	0	0	0	0	0	1.62072
BnaA03g35880D	0	0	0	0	0	1.62144
BnaC09g32680D	0	0	0	0	0	1.62299
BnaC06g21190D	0	0	0	0	0	1.62344
BnaCnng42990D	0	0	0	0	0	1.62383
BnaA07g13930D	0	0	0	0	0	1.62389
BnaCnng71390D	0	0	0	0	0	1.62473
BnaA10g20530D	0	0	0	0	0	1.62525
BnaC02g42680D	0	0	0	0	0	1.62577
BnaC08g17230D	0	0	0	0	0	1.62707
BnaC02g39460D	0	0	0	0	0	1.63132
BnaC05g16140D	0	0	0	0	0	1.63608
BnaA09g46610D	0	0	0	0	0	1.637
BnaA07g10590D	0	0	0	0	0	1.63879
BnaC08g19320D	0	0	0	0	0	1.63889
BnaA08g00740D	0	0	0	0	0	1.6392
BnaA09g00130D	0	0	0	0	0	1.64053
BnaC08g18860D	0	0	0	0	0	1.64216
BnaA06g14360D	0	0	0	0	0	1.64226
BnaA06g24170D	0	0	0	0	0	1.64241
BnaA01g33290D	0	0	0	0	0	1.64315
BnaA06g16950D	0	0	0	0	0	1.64332
BnaC03g73080D	0	0	0	0	0	1.64609
BnaC08g07230D	0	0	0	0	0	1.64766
BnaA05g23020D	0	0	0	0	0	1.6482
BnaC09g29290D	0	0	0	0	0	1.65149
BnaA01g19590D	0	0	0	0	0	1.65327
BnaA07g10040D	0	0	0	0	0	1.65332
BnaA03g42280D	0	0	0	0	0	1.65598
BnaA01g06700D	0	0	0	0	0	1.65818
BnaA09g27680D	0	0	0	0	0	1.65832
BnaC08g05600D	0	0	0	0	0	1.65897
BnaC05g36380D	0	0	0	0	0	1.66004
BnaA08g00140D	0	0	0	0	0	1.6603
BnaA07g33420D	0	0	0	0	0	1.66266
BnaC01g19960D	0	0	0	0	0	1.66331
BnaA03g05110D	0	0	0	0	0	1.66333
BnaA01g17140D	0	0	0	0	0	1.66406
BnaC06g24700D	0	0	0	0	0	1.66624
BnaAnng30990D	0	0	0	0	0	1.66632
BnaA06g06810D	0	0	0	0	0	1.66654
BnaA08g21750D	0	0	0	0	0	1.66702
BnaA07g02870D	0	0	0	0	0	1.66775
BnaA10g01930D	0	0	0	0	0	1.66996
BnaCnng25280D	0	0	0	0	0	1.67296
BnaC08g12300D	0	0	0	0	0	1.67348
BnaCnng09020D	0	0	0	0	0	1.67507
BnaA09g26420D	0	0	0	0	0	1.67529
BnaAnng07130D	0	0	0	0	0	1.67831
BnaC06g32630D	0	0	0	0	0	1.67985
BnaC08g01760D	0	0	0	0	0	1.68238
BnaA07g19820D	0	0	0	0	0	1.68386
BnaC06g21250D	0	0	0	0	0	1.68481
BnaA08g06540D	0	0	0	0	0	1.68524
BnaA03g08320D	0	0	0	0	0	1.68804
BnaA05g35680D	0	0	0	0	0	1.68903
BnaC07g16550D	0	0	0	0	0	1.69112
BnaCnng21490D	0	0	0	0	0	1.6922
BnaC05g05190D	0	0	0	0	0	1.6961
BnaA02g34200D	0	0	0	0	0	1.69675
BnaA02g13340D	0	0	0	0	0	1.69802
BnaC03g25540D	0	0	0	0	0	1.70029
BnaC03g31070D	0	0	0	0	0	1.70036
BnaC09g08090D	0	0	0	0	0	1.70215
BnaC09g20030D	0	0	0	0	0	1.70335
BnaA08g13840D	0	0	0	0	0	1.70415
BnaC09g43060D	0	0	0	0	0	1.70629
BnaC05g04350D	0	0	0	0	0	1.70685
BnaA07g08530D	0	0	0	0	0	1.70735
BnaA03g57640D	0	0	0	0	0	1.70817
BnaA05g13790D	0	0	0	0	0	1.70939
BnaC03g12510D	0	0	0	0	0	1.71335
BnaA09g40490D	0	0	0	0	0	1.71349
BnaA07g35370D	0	0	0	0	0	1.71633
BnaC05g09400D	0	0	0	0	0	1.71752
BnaC02g47540D	0	0	0	0	0	1.71813
BnaC04g09650D	0	0	0	0	0	1.72153
BnaC03g06640D	0	0	0	0	0	1.72158
BnaA09g27660D	0	0	0	0	0	1.7218
BnaA03g12630D	0	0	0	0	0	1.72283
BnaA06g31950D	0	0	0	0	0	1.72309
BnaA06g10590D	0	0	0	0	0	1.72386
BnaA10g21890D	0	0	0	0	0	1.72701
BnaA03g37780D	0	0	0	0	0	1.7282
BnaC03g71050D	0	0	0	0	0	1.72954
BnaC02g41120D	0	0	0	0	0	1.7316
BnaA08g18340D	0	0	0	0	0	1.73254
BnaC07g10150D	0	0	0	0	0	1.7339
BnaC03g34540D	0	0	0	0	0	1.7345
BnaC08g19040D	0	0	0	0	0	1.73465
BnaCnng59650D	0	0	0	0	0	1.73859
BnaC07g44600D	0	0	0	0	0	1.74408
BnaA06g04070D	0	0	0	0	0	1.74505
BnaA06g34350D	0	0	0	0	0	1.74558
BnaA06g32320D	0	0	0	0	0	1.74612
BnaA07g29550D	0	0	0	0	0	1.74999
BnaA07g34660D	0	0	0	0	0	1.75096
BnaA03g43870D	0	0	0	0	0	1.75524
BnaC09g34350D	0	0	0	0	0	1.7613
BnaA03g39970D	0	0	0	0	0	1.76177
BnaA06g36080D	0	0	0	0	0	1.76293
BnaA03g41560D	0	0	0	0	0	1.76329
BnaA08g04620D	0	0	0	0	0	1.7639
BnaA06g39100D	0	0	0	0	0	1.76402
BnaA08g09330D	0	0	0	0	0	1.76519
BnaA10g23330D	0	0	0	0	0	1.7654
BnaC07g17300D	0	0	0	0	0	1.76722
BnaC05g19270D	0	0	0	0	0	1.7673
BnaCnng78620D	0	0	0	0	0	1.76869
BnaAnng02190D	0	0	0	0	0	1.76958
BnaC08g21640D	0	0	0	0	0	1.7697
BnaCnng22350D	0	0	0	0	0	1.77262
BnaC08g11400D	0	0	0	0	0	1.77273
BnaC05g37730D	0	0	0	0	0	1.77282
BnaA01g34130D	0	0	0	0	0	1.77471
BnaC05g12590D	0	0	0	0	0	1.77612
BnaC09g35440D	0	0	0	0	0	1.77818
BnaCnng05190D	0	0	0	0	0	1.77946
BnaCnng15830D	0	0	0	0	0	1.78001
BnaA09g10390D	0	0	0	0	0	1.78126
BnaA06g23380D	0	0	0	0	0	1.78331
BnaA06g25970D	0	0	0	0	0	1.78374
BnaA10g10950D	0	0	0	0	0	1.7844
BnaA07g32870D	0	0	0	0	0	1.78445
BnaC03g12390D	0	0	0	0	0	1.78776
BnaA03g13320D	0	0	0	0	0	1.79016
BnaA03g40020D	0	0	0	0	0	1.79232
BnaC05g07890D	0	0	0	0	0	1.7952
BnaC07g24800D	0	0	0	0	0	1.7979
BnaC08g25050D	0	0	0	0	0	1.80169
BnaC01g16760D	0	0	0	0	0	1.80291
BnaC05g14600D	0	0	0	0	0	1.80551
BnaA10g11120D	0	0	0	0	0	1.80784
BnaC09g29420D	0	0	0	0	0	1.81481
BnaCnng39600D	0	0	0	0	0	1.81561
BnaC09g20050D	0	0	0	0	0	1.81819
BnaC03g48750D	0	0	0	0	0	1.81924
BnaA05g29710D	0	0	0	0	0	1.82089
BnaA03g18990D	0	0	0	0	0	1.82136
BnaAnng04970D	0	0	0	0	0	1.82214
BnaA04g27830D	0	0	0	0	0	1.82707
BnaAnng38640D	0	0	0	0	0	1.83151
BnaC07g42720D	0	0	0	0	0	1.83537
BnaA08g16960D	0	0	0	0	0	1.83599
BnaA05g24000D	0	0	0	0	0	1.83652
BnaCnng06700D	0	0	0	0	0	1.84079
BnaA09g02950D	0	0	0	0	0	1.84374
BnaC08g41160D	0	0	0	0	0	1.84779
BnaCnng37450D	0	0	0	0	0	1.84935
BnaC04g45690D	0	0	0	0	0	1.85008
BnaC03g51830D	0	0	0	0	0	1.85369
BnaA10g24440D	0	0	0	0	0	1.85529
BnaC02g00070D	0	0	0	0	0	1.85938
BnaAnng23710D	0	0	0	0	0	1.8613
BnaC03g71690D	0	0	0	0	0	1.86162
BnaCnng64710D	0	0	0	0	0	1.8631
BnaC04g33730D	0	0	0	0	0	1.8639
BnaC09g20850D	0	0	0	0	0	1.86762
BnaA09g35480D	0	0	0	0	0	1.86972
BnaC04g31650D	0	0	0	0	0	1.86993
BnaC05g03580D	0	0	0	0	0	1.87024
BnaA09g32150D	0	0	0	0	0	1.87255
BnaA06g17590D	0	0	0	0	0	1.87369
BnaA04g04400D	0	0	0	0	0	1.87621
BnaAnng37740D	0	0	0	0	0	1.8768
BnaA02g24930D	0	0	0	0	0	1.87715
BnaAnng27610D	0	0	0	0	0	1.87732
BnaA09g56870D	0	0	0	0	0	1.87767
BnaC01g25860D	0	0	0	0	0	1.87908
BnaC03g72010D	0	0	0	0	0	1.87957
BnaC06g13910D	0	0	0	0	0	1.88625
BnaC03g72550D	0	0	0	0	0	1.88708
BnaC08g33100D	0	0	0	0	0	1.89002
BnaA07g01950D	0	0	0	0	0	1.89291
BnaA08g25620D	0	0	0	0	0	1.89398
BnaC07g09690D	0	0	0	0	0	1.8943
BnaA02g16580D	0	0	0	0	0	1.8986
BnaA03g05130D	0	0	0	0	0	1.9011
BnaC04g40990D	0	0	0	0	0	1.90435
BnaC05g07900D	0	0	0	0	0	1.90544
BnaA09g42250D	0	0	0	0	0	1.90896
BnaA06g21110D	0	0	0	0	0	1.91066
BnaA07g21940D	0	0	0	0	0	1.9119
BnaA09g50650D	0	0	0	0	0	1.91225
BnaC09g04040D	0	0	0	0	0	1.9127
BnaA09g55020D	0	0	0	0	0	1.91323
BnaAnng28530D	0	0	0	0	0	1.91995
BnaUnng03250D	0	0	0	0	0	1.00124
BnaC05g13800D	0	0	0	0	0	1.002
BnaAnng36340D	0	0	0	0	0	1.00276
BnaC03g67410D	0	0	0	0	0	1.0028
BnaC08g17160D	0	0	0	0	0	1.00314
BnaA03g28480D	0	0	0	0	0	1.00383
BnaA06g37270D	0	0	0	0	0	1.00441
BnaA07g38760D	0	0	0	0	0	1.00444
BnaAnng31500D	0	0	0	0	0	1.00589
BnaC05g30280D	0	0	0	0	0	1.00609
BnaC08g23330D	0	0	0	0	0	1.00658
BnaC02g42690D	0	0	0	0	0	1.00679
BnaC03g50270D	0	0	0	0	0	1.00714
BnaA07g19020D	0	0	0	0	0	1.00757
BnaA09g34030D	0	0	0	0	0	1.00815
BnaC03g28320D	0	0	0	0	0	1.00901
BnaC06g38580D	0	0	0	0	0	1.01008
BnaC04g25820D	0	0	0	0	0	1.01021
BnaA01g00010D	0	0	0	0	0	1.01076
BnaC03g20950D	0	0	0	0	0	1.01092
BnaAnng21800D	0	0	0	0	0	1.011
BnaC02g33830D	0	0	0	0	0	1.01163
BnaC01g25760D	0	0	0	0	0	1.01197
BnaC05g06710D	0	0	0	0	0	1.01224
BnaC09g49020D	0	0	0	0	0	1.01291
BnaC08g24780D	0	0	0	0	0	1.01427
BnaCnng16760D	0	0	0	0	0	1.01489
BnaA03g30530D	0	0	0	0	0	1.01492
BnaC09g47840D	0	0	0	0	0	1.01528
BnaC08g02410D	0	0	0	0	0	1.01538
BnaC07g03550D	0	0	0	0	0	1.01541
BnaCnng19730D	0	0	0	0	0	1.01591
BnaC05g32790D	0	0	0	0	0	1.01635
BnaC09g02080D	0	0	0	0	0	1.01639
BnaC01g15560D	0	0	0	0	0	1.0167
BnaA03g06250D	0	0	0	0	0	1.01735
BnaA02g33090D	0	0	0	0	0	1.01829
BnaC08g34420D	0	0	0	0	0	1.01867
BnaA10g09470D	0	0	0	0	0	1.01919
BnaA10g23270D	0	0	0	0	0	1.01985
BnaC04g26670D	0	0	0	0	0	1.01995
BnaC03g05780D	0	0	0	0	0	1.02128
BnaC02g12750D	0	0	0	0	0	1.02137
BnaA03g44400D	0	0	0	0	0	1.02314
BnaA07g34370D	0	0	0	0	0	1.02329
BnaA05g19630D	0	0	0	0	0	1.02345
BnaA05g09830D	0	0	0	0	0	1.02418
BnaCnng43180D	0	0	0	0	0	1.02425
BnaC04g54960D	0	0	0	0	0	1.02454
BnaC09g31680D	0	0	0	0	0	1.02521
BnaC03g30720D	0	0	0	0	0	1.0259
BnaC03g39420D	0	0	0	0	0	1.02614
BnaC04g01400D	0	0	0	0	0	1.02615
BnaA03g21800D	0	0	0	0	0	1.02628
BnaA03g16950D	0	0	0	0	0	1.02695
BnaC01g03610D	0	0	0	0	0	1.02739
BnaA02g07500D	0	0	0	0	0	1.02757
BnaC05g49730D	0	0	0	0	0	1.0277
BnaC04g35500D	0	0	0	0	0	1.02811
BnaC09g45200D	0	0	0	0	0	1.02816
BnaA08g24150D	0	0	0	0	0	1.02916
BnaC04g16450D	0	0	0	0	0	1.02964
BnaC07g31950D	0	0	0	0	0	1.02964
BnaCnng12150D	0	0	0	0	0	1.02977
BnaC05g14000D	0	0	0	0	0	1.0298
BnaC06g00540D	0	0	0	0	0	1.02992
BnaA07g38880D	0	0	0	0	0	1.03003
BnaA05g04210D	0	0	0	0	0	1.03044
BnaC09g33030D	0	0	0	0	0	1.03126
BnaA05g25120D	0	0	0	0	0	1.03199
BnaA04g14770D	0	0	0	0	0	1.03259
BnaC08g47980D	0	0	0	0	0	1.03263
BnaA07g35060D	0	0	0	0	0	1.03356
BnaA02g02710D	0	0	0	0	0	1.03688
BnaC05g14920D	0	0	0	0	0	1.03737
BnaCnng17310D	0	0	0	0	0	1.03769
BnaA07g10570D	0	0	0	0	0	1.0377
BnaA06g22770D	0	0	0	0	0	1.03891
BnaA06g14560D	0	0	0	0	0	1.03909
BnaC02g46710D	0	0	0	0	0	1.03929
BnaA02g29490D	0	0	0	0	0	1.04027
BnaCnng63240D	0	0	0	0	0	1.04044
BnaC06g10900D	0	0	0	0	0	1.04198
BnaC03g50130D	0	0	0	0	0	1.04544
BnaA03g01480D	0	0	0	0	0	1.0457
BnaA09g03060D	0	0	0	0	0	1.04595
BnaA09g27690D	0	0	0	0	0	1.04608
BnaA03g25430D	0	0	0	0	0	1.04609
BnaC09g21180D	0	0	0	0	0	1.04616
BnaC06g00380D	0	0	0	0	0	1.04641
BnaCnng57130D	0	0	0	0	0	1.04662
BnaC08g05950D	0	0	0	0	0	1.04728
BnaC07g50680D	0	0	0	0	0	1.0475
BnaCnng16060D	0	0	0	0	0	1.04777
BnaC09g19270D	0	0	0	0	0	1.04784
BnaA03g16640D	0	0	0	0	0	1.04919
BnaA07g07430D	0	0	0	0	0	1.04925
BnaCnng20770D	0	0	0	0	0	1.04943
BnaA09g33230D	0	0	0	0	0	1.05063
BnaA01g15870D	0	0	0	0	0	1.05211
BnaA02g12120D	0	0	0	0	0	1.05215
BnaA08g22930D	0	0	0	0	0	1.05259
BnaC01g29320D	0	0	0	0	0	1.05264
BnaC07g33180D	0	0	0	0	0	1.05302
BnaC03g58880D	0	0	0	0	0	1.05311
BnaC09g36820D	0	0	0	0	0	1.05338
BnaA10g25790D	0	0	0	0	0	1.05366
BnaC04g45620D	0	0	0	0	0	1.05435
BnaA01g19790D	0	0	0	0	0	1.05439
BnaA09g11230D	0	0	0	0	0	1.05509
BnaAnng00990D	0	0	0	0	0	1.05579
BnaA01g29460D	0	0	0	0	0	1.0561
BnaCnng24950D	0	0	0	0	0	1.05612
BnaC07g44090D	0	0	0	0	0	1.05623
BnaC06g38420D	0	0	0	0	0	1.05628
BnaA09g02880D	0	0	0	0	0	1.05861
BnaC05g44210D	0	0	0	0	0	1.05887
BnaC08g25900D	0	0	0	0	0	1.05918
BnaA07g12110D	0	0	0	0	0	1.05987
BnaC01g42090D	0	0	0	0	0	1.06046
BnaA03g46420D	0	0	0	0	0	1.06057
BnaA01g05900D	0	0	0	0	0	1.06077
BnaC09g07640D	0	0	0	0	0	1.06165
BnaC06g18970D	0	0	0	0	0	1.06177
BnaA09g56530D	0	0	0	0	0	1.06285
BnaA09g33560D	0	0	0	0	0	1.06313
BnaC09g05190D	0	0	0	0	0	1.06322
BnaC02g00380D	0	0	0	0	0	1.06404
BnaC07g23920D	0	0	0	0	0	1.06419
BnaC04g05480D	0	0	0	0	0	1.06514
BnaC09g25130D	0	0	0	0	0	1.06555
BnaA09g49350D	0	0	0	0	0	1.06581
BnaA01g22050D	0	0	0	0	0	1.06646
BnaC05g44000D	0	0	0	0	0	1.06804
BnaA05g27950D	0	0	0	0	0	1.07004
BnaC01g39330D	0	0	0	0	0	1.07089
BnaA02g08090D	0	0	0	0	0	1.07098
BnaA01g10580D	0	0	0	0	0	1.07123
BnaA04g12770D	0	0	0	0	0	1.07199
BnaA03g25960D	0	0	0	0	0	1.07245
BnaC04g03960D	0	0	0	0	0	1.07399
BnaC05g44130D	0	0	0	0	0	1.07417
BnaC09g23480D	0	0	0	0	0	1.07425
BnaA06g13230D	0	0	0	0	0	1.07527
BnaC08g43650D	0	0	0	0	0	1.07566
BnaC01g20500D	0	0	0	0	0	1.07585
BnaA02g01520D	0	0	0	0	0	1.07603
BnaC09g08100D	0	0	0	0	0	1.07627
BnaC08g40500D	0	0	0	0	0	1.07642
BnaC09g06170D	0	0	0	0	0	1.07661
BnaC03g20310D	0	0	0	0	0	1.07772
BnaCnng57670D	0	0	0	0	0	1.07784
BnaC03g37540D	0	0	0	0	0	1.07838
BnaC01g05650D	0	0	0	0	0	1.079
BnaA07g18360D	0	0	0	0	0	1.0791
BnaAnng22440D	0	0	0	0	0	1.07914
BnaA01g29610D	0	0	0	0	0	1.07969
BnaC07g20190D	0	0	0	0	0	1.08025
BnaC01g08580D	0	0	0	0	0	1.08175
BnaC08g45010D	0	0	0	0	0	1.08272
BnaC07g21670D	0	0	0	0	0	1.08287
BnaC02g44050D	0	0	0	0	0	1.08329
BnaCnng38440D	0	0	0	0	0	1.08359
BnaC04g30790D	0	0	0	0	0	1.08524
BnaC05g39300D	0	0	0	0	0	1.08538
BnaA05g17300D	0	0	0	0	0	1.08618
BnaC08g06440D	0	0	0	0	0	1.08662
BnaA06g32690D	0	0	0	0	0	1.08857
BnaA01g16600D	0	0	0	0	0	1.09006
BnaC01g38550D	0	0	0	0	0	1.09052
BnaA04g18980D	0	0	0	0	0	1.09115
BnaA08g30020D	0	0	0	0	0	1.09129
BnaC07g50310D	0	0	0	0	0	1.09168
BnaCnng24910D	0	0	0	0	0	1.09168
BnaA09g34930D	0	0	0	0	0	1.09182
BnaAnng12130D	0	0	0	0	0	1.093
BnaC08g17590D	0	0	0	0	0	1.09455
BnaC05g20420D	0	0	0	0	0	1.09501
BnaA06g23370D	0	0	0	0	0	1.09549
BnaA07g29140D	0	0	0	0	0	1.0958
BnaA04g19840D	0	0	0	0	0	1.09601
BnaA02g19850D	0	0	0	0	0	1.09614
BnaA08g26010D	0	0	0	0	0	1.09659
BnaC05g41220D	0	0	0	0	0	1.09689
BnaC08g36980D	0	0	0	0	0	1.09705
BnaC01g36990D	0	0	0	0	0	1.0975
BnaC06g40040D	0	0	0	0	0	1.09812
BnaA03g57520D	0	0	0	0	0	1.09819
BnaA10g15650D	0	0	0	0	0	1.09938
BnaC05g30260D	0	0	0	0	0	1.10029
BnaA04g22430D	0	0	0	0	0	1.10144
BnaC05g46990D	0	0	0	0	0	1.10289
BnaA09g27270D	0	0	0	0	0	1.10322
BnaA03g03200D	0	0	0	0	0	1.10496
BnaC02g42250D	0	0	0	0	0	1.1052
BnaC07g11980D	0	0	0	0	0	1.10532
BnaA02g26680D	0	0	0	0	0	1.10535
BnaCnng03040D	0	0	0	0	0	1.10607
BnaA03g14580D	0	0	0	0	0	1.1065
BnaA02g25530D	0	0	0	0	0	1.10656
BnaA09g44810D	0	0	0	0	0	1.10805
BnaC08g34700D	0	0	0	0	0	1.10897
BnaC08g42510D	0	0	0	0	0	1.10935
BnaC06g29110D	0	0	0	0	0	1.10986
BnaA02g03050D	0	0	0	0	0	1.11047
BnaC01g11040D	0	0	0	0	0	1.11052
BnaA02g20230D	0	0	0	0	0	1.11081
BnaC07g11210D	0	0	0	0	0	1.11121
BnaA01g16530D	0	0	0	0	0	1.11157
BnaC07g48490D	0	0	0	0	0	1.11314
BnaA03g34240D	0	0	0	0	0	1.1133
BnaA01g05660D	0	0	0	0	0	1.11333
BnaC01g04280D	0	0	0	0	0	1.11441
BnaC07g36250D	0	0	0	0	0	1.11443
BnaC05g18480D	0	0	0	0	0	1.11482
BnaC05g45070D	0	0	0	0	0	1.11593
BnaA09g52410D	0	0	0	0	0	1.11617
BnaA06g34210D	0	0	0	0	0	1.11629
BnaA08g17020D	0	0	0	0	0	1.1165
BnaA02g11890D	0	0	0	0	0	1.11979
BnaC08g00600D	0	0	0	0	0	1.12005
BnaAnng00800D	0	0	0	0	0	1.12059
BnaC08g10200D	0	0	0	0	0	1.1206
BnaC05g44290D	0	0	0	0	0	1.12066
BnaA06g23210D	0	0	0	0	0	1.12107
BnaC08g19950D	0	0	0	0	0	1.12114
BnaA08g22020D	0	0	0	0	0	1.1216
BnaA05g29350D	0	0	0	0	0	1.12265
BnaC06g06210D	0	0	0	0	0	1.12394
BnaC01g02070D	0	0	0	0	0	1.12441
BnaA05g31630D	0	0	0	0	0	1.12494
BnaA07g10420D	0	0	0	0	0	1.12496
BnaA07g13430D	0	0	0	0	0	1.12515
BnaC05g07800D	0	0	0	0	0	1.12541
BnaA03g04640D	0	0	0	0	0	1.12722
BnaC03g73280D	0	0	0	0	0	1.1273
BnaC06g26680D	0	0	0	0	0	1.1273
BnaCnng62280D	0	0	0	0	0	1.12767
BnaA10g15830D	0	0	0	0	0	1.12797
BnaC03g60240D	0	0	0	0	0	1.12919
BnaA08g16320D	0	0	0	0	0	1.13035
BnaC02g34830D	0	0	0	0	0	1.13047
BnaC05g22710D	0	0	0	0	0	1.13053
BnaA09g45450D	0	0	0	0	0	1.13077
BnaC06g06250D	0	0	0	0	0	1.1308
BnaCnng29120D	0	0	0	0	0	1.13325
BnaC03g18600D	0	0	0	0	0	1.13368
BnaA08g13380D	0	0	0	0	0	1.13408
BnaA05g14540D	0	0	0	0	0	1.13592
BnaA06g26790D	0	0	0	0	0	1.13595
BnaC01g24140D	0	0	0	0	0	1.13708
BnaC08g33560D	0	0	0	0	0	1.13778
BnaA05g06450D	0	0	0	0	0	1.13913
BnaA09g26960D	0	0	0	0	0	1.13968
BnaC08g33050D	0	0	0	0	0	1.14031
BnaA09g55850D	0	0	0	0	0	1.14054
BnaA07g31010D	0	0	0	0	0	1.14061
BnaA03g40730D	0	0	0	0	0	1.14189
BnaC03g16650D	0	0	0	0	0	1.14241
BnaC01g44140D	0	0	0	0	0	1.14267
BnaA04g05850D	0	0	0	0	0	1.14278
BnaC05g09070D	0	0	0	0	0	1.14283
BnaA01g01690D	0	0	0	0	0	1.14299
BnaA10g02180D	0	0	0	0	0	1.14381
BnaA07g31410D	0	0	0	0	0	1.14446
BnaCnng02250D	0	0	0	0	0	1.14557
BnaA02g36500D	0	0	0	0	0	1.14566
BnaA01g18660D	0	0	0	0	0	1.14621
BnaA09g28100D	0	0	0	0	0	1.14633
BnaA08g04350D	0	0	0	0	0	1.14637
BnaC03g34690D	0	0	0	0	0	1.1464
BnaAnng15620D	0	0	0	0	0	1.14731
BnaAnng00720D	0	0	0	0	0	1.14847
BnaAnng12470D	0	0	0	0	0	1.14874
BnaA06g30390D	0	0	0	0	0	1.15003
BnaC04g37590D	0	0	0	0	0	1.15054
BnaC07g13450D	0	0	0	0	0	1.15109
BnaC06g36100D	0	0	0	0	0	1.15122
BnaC04g53720D	0	0	0	0	0	1.15127
BnaC02g02650D	0	0	0	0	0	1.15136
BnaC06g13860D	0	0	0	0	0	1.15216
BnaAnng00040D	0	0	0	0	0	1.15218
BnaC05g02740D	0	0	0	0	0	1.15222
BnaC06g37130D	0	0	0	0	0	1.15248
BnaC03g78170D	0	0	0	0	0	1.15265
BnaCnng15960D	0	0	0	0	0	1.15296
BnaC08g39680D	0	0	0	0	0	1.15328
BnaA03g16990D	0	0	0	0	0	1.15341
BnaC07g07290D	0	0	0	0	0	1.15614
BnaAnng03940D	0	0	0	0	0	1.15667
BnaA05g00310D	0	0	0	0	0	1.15764
BnaA03g17020D	0	0	0	0	0	1.15788
BnaA09g04940D	0	0	0	0	0	1.15812
BnaC07g13660D	0	0	0	0	0	1.15951
BnaA09g51790D	0	0	0	0	0	1.15954
BnaC02g08820D	0	0	0	0	0	1.16019
BnaA03g01590D	0	0	0	0	0	1.16098
BnaC05g21260D	0	0	0	0	0	1.1615
BnaC03g25650D	0	0	0	0	0	1.1616
BnaA08g27650D	0	0	0	0	0	1.16167
BnaC03g26070D	0	0	0	0	0	1.16187
BnaA06g03860D	0	0	0	0	0	1.16188
BnaA07g26810D	0	0	0	0	0	1.16209
BnaC03g25840D	0	0	0	0	0	1.16324
BnaC05g00510D	0	0	0	0	0	1.1641
BnaUnng00720D	0	0	0	0	0	1.16415
BnaC09g42440D	0	0	0	0	0	1.16432
BnaC05g41610D	0	0	0	0	0	1.16521
BnaA09g31440D	0	0	0	0	0	1.16551
BnaA01g14130D	0	0	0	0	0	1.16604
BnaC04g15330D	0	0	0	0	0	1.16612
BnaA10g00330D	0	0	0	0	0	1.16614
BnaA10g26390D	0	0	0	0	0	1.16672
BnaA01g11090D	0	0	0	0	0	1.16731
BnaC07g27240D	0	0	0	0	0	1.16752
BnaC02g08370D	0	0	0	0	0	1.16804
BnaA01g29870D	0	0	0	0	0	1.16822
BnaA03g06520D	0	0	0	0	0	1.16837
BnaAnng02310D	0	0	0	0	0	1.16953
BnaC03g37090D	0	0	0	0	0	1.16993
BnaA04g04550D	0	0	0	0	0	1.17144
BnaA02g10760D	0	0	0	0	0	1.17165
BnaC07g26280D	0	0	0	0	0	1.17176
BnaA03g32250D	0	0	0	0	0	1.17238
BnaC02g43800D	0	0	0	0	0	1.17252
BnaA02g34220D	0	0	0	0	0	1.17315
BnaA07g15390D	0	0	0	0	0	1.1732
BnaA03g20980D	0	0	0	0	0	1.17363
BnaA09g40600D	0	0	0	0	0	1.17425
BnaA08g08540D	0	0	0	0	0	1.17442
BnaC08g18790D	0	0	0	0	0	1.17458
BnaC09g02300D	0	0	0	0	0	1.17483
BnaA09g21110D	0	0	0	0	0	1.17533
BnaA05g31930D	0	0	0	0	0	1.17638
BnaA09g05630D	0	0	0	0	0	1.177
BnaA09g07030D	0	0	0	0	0	1.17829
BnaA02g19700D	0	0	0	0	0	1.17872
BnaC03g64590D	0	0	0	0	0	1.17942
BnaC08g22980D	0	0	0	0	0	1.18
BnaA05g20960D	0	0	0	0	0	1.18062
BnaC03g29850D	0	0	0	0	0	1.18071
BnaC01g37230D	0	0	0	0	0	1.18127
BnaC04g22040D	0	0	0	0	0	1.18204
BnaA01g26720D	0	0	0	0	0	1.18356
BnaA07g05940D	0	0	0	0	0	1.1839
BnaC02g47770D	0	0	0	0	0	1.18441
BnaA05g28100D	0	0	0	0	0	1.18455
BnaC08g27270D	0	0	0	0	0	1.18546
BnaA08g10030D	0	0	0	0	0	1.18555
BnaA09g16040D	0	0	0	0	0	1.18564
BnaA06g05280D	0	0	0	0	0	1.18568
BnaA05g01330D	0	0	0	0	0	1.18669
BnaA05g29800D	0	0	0	0	0	1.18671
BnaA06g21300D	0	0	0	0	0	1.18757
BnaCnng10730D	0	0	0	0	0	1.1876
BnaC03g72350D	0	0	0	0	0	1.18776
BnaA07g22650D	0	0	0	0	0	1.188
BnaA06g22070D	0	0	0	0	0	1.18841
BnaC09g15510D	0	0	0	0	0	1.18843
BnaC04g01070D	0	0	0	0	0	1.1888
BnaA09g52450D	0	0	0	0	0	1.18936
BnaA03g31320D	0	0	0	0	0	1.18942
BnaC03g09470D	0	0	0	0	0	1.18952
BnaA04g09570D	0	0	0	0	0	1.19073
BnaC03g22170D	0	0	0	0	0	1.19091
BnaA04g26520D	0	0	0	0	0	1.19181
BnaA03g57940D	0	0	0	0	0	1.19197
BnaC01g02400D	0	0	0	0	0	1.19382
BnaC03g08550D	0	0	0	0	0	1.19423
BnaAnng18240D	0	0	0	0	0	1.19452
BnaA02g25390D	0	0	0	0	0	1.19515
BnaC07g31660D	0	0	0	0	0	1.19575
BnaCnng40390D	0	0	0	0	0	1.19607
BnaC01g39730D	0	0	0	0	0	1.19642
BnaA07g35130D	0	0	0	0	0	1.19759
BnaC07g28790D	0	0	0	0	0	1.19789
BnaA09g38190D	0	0	0	0	0	1.19822
BnaAnng37460D	0	0	0	0	0	1.19916
BnaAnng14330D	0	0	0	0	0	1.19918
BnaA01g30570D	0	0	0	0	0	1.19921
BnaA07g12060D	0	0	0	0	0	1.19949
BnaA09g50330D	0	0	0	0	0	1.1996
BnaA10g21090D	0	0	0	0	0	1.2013
BnaA04g14250D	0	0	0	0	0	1.20153
BnaC05g12030D	0	0	0	0	0	1.204
BnaA07g16170D	0	0	0	0	0	1.20507
BnaC01g41760D	0	0	0	0	0	1.20577
BnaC01g03790D	0	0	0	0	0	1.20654
BnaA03g46510D	0	0	0	0	0	1.20898
BnaA10g28060D	0	0	0	0	0	1.21075
BnaA04g16530D	0	0	0	0	0	1.21101
BnaC04g05380D	0	0	0	0	0	1.21103
BnaC08g46000D	0	0	0	0	0	1.21112
BnaA07g32360D	0	0	0	0	0	1.21173
BnaA10g09180D	0	0	0	0	0	1.21353
BnaC04g21240D	0	0	0	0	0	1.21364
BnaC08g42890D	0	0	0	0	0	1.21405
BnaA08g04220D	0	0	0	0	0	1.21425
BnaCnng07380D	0	0	0	0	0	1.21456
BnaC03g17440D	0	0	0	0	0	1.21465
BnaC07g00560D	0	0	0	0	0	1.21543
BnaA05g23620D	0	0	0	0	0	1.21638
BnaC03g20050D	0	0	0	0	0	1.21672
BnaC02g34800D	0	0	0	0	0	1.21699
BnaC05g01130D	0	0	0	0	0	1.2179
BnaC03g69760D	0	0	0	0	0	1.21875
BnaCnng64600D	0	0	0	0	0	1.22157
BnaC01g20120D	0	0	0	0	0	1.2224
BnaA06g31800D	0	0	0	0	0	1.22256
BnaC09g44670D	0	0	0	0	0	1.22495
BnaA04g24070D	0	0	0	0	0	1.22527
BnaC05g04750D	0	0	0	0	0	1.22584
BnaA07g32230D	0	0	0	0	0	1.22596
BnaA09g00350D	0	0	0	0	0	1.22698
BnaCnng62490D	0	0	0	0	0	1.22738
BnaA07g24600D	0	0	0	0	0	1.22865
BnaC02g06510D	0	0	0	0	0	1.2297
BnaA07g23850D	0	0	0	0	0	1.22974
BnaA03g57550D	0	0	0	0	0	1.22988
BnaA04g04420D	0	0	0	0	0	1.23071
BnaA07g30000D	0	0	0	0	0	1.23072
BnaAnng16300D	0	0	0	0	0	1.23089
BnaA03g24470D	0	0	0	0	0	1.23135
BnaC04g42540D	0	0	0	0	0	1.2315
BnaA05g24870D	0	0	0	0	0	1.23228
BnaA10g10300D	0	0	0	0	0	1.23239
BnaA03g23660D	0	0	0	0	0	1.2324
BnaC08g50020D	0	0	0	0	0	1.2325
BnaA01g24360D	0	0	0	0	0	1.23257
BnaC01g02780D	0	0	0	0	0	1.23323
BnaC08g03570D	0	0	0	0	0	1.23422
BnaC09g36920D	0	0	0	0	0	1.23564
BnaC05g40000D	0	0	0	0	0	1.23629
BnaC01g02370D	0	0	0	0	0	1.23702
BnaC05g27530D	0	0	0	0	0	1.23795
BnaC03g19280D	0	0	0	0	0	1.23804
BnaC03g34330D	0	0	0	0	0	1.2393
BnaA10g10760D	0	0	0	0	0	1.2397
BnaC08g30150D	0	0	0	0	0	1.23972
BnaC09g11490D	0	0	0	0	0	1.24138
BnaA02g29730D	0	0	0	0	0	1.24207
BnaC09g41580D	0	0	0	0	0	1.24216
BnaC09g16320D	0	0	0	0	0	1.24322
BnaA05g23920D	0	0	0	0	0	1.24461
BnaC05g21590D	0	0	0	0	0	1.24564
BnaA10g23790D	0	0	0	0	0	1.24737
BnaA03g37150D	0	0	0	0	0	1.24747
BnaAnng13880D	0	0	0	0	0	1.24807
BnaC09g38120D	0	0	0	0	0	1.24875
BnaC06g16920D	0	0	0	0	0	1.25062
BnaC04g28440D	0	0	0	0	0	1.25237
BnaCnng73390D	0	0	0	0	-2.10693	0
BnaCnng55190D	0	0	0	0	-1.93127	0
BnaC07g36760D	0	0	0	0	-1.87264	0
BnaA02g18700D	0	-2.32663	0	0	-1.81739	0
BnaCnng39740D	0	0	0	0	-1.76676	0
BnaC03g45960D	0	0	0	0	-1.71619	0
BnaA08g24180D	0	-2.20824	0	0	-1.41421	0
BnaA05g34410D	0	0	0	0	-1.25823	0
BnaC04g03400D	0	0	0	0	-1.24236	0
BnaA06g26510D	0	0	0	0	-2.98263	0
BnaC03g22990D	0	0	0	0	-2.81993	0
BnaA06g33560D	0	0	0	0	-2.68986	0
BnaAnng31630D	0	0	0	0	-2.62531	0
BnaC09g37240D	0	0	0	0	-2.43947	0
BnaC09g49910D	0	0	0	0	-2.43578	0
BnaC01g17020D	0	0	0	0	-2.3289	0
BnaC04g04080D	0	0	0	0	-2.27781	0
BnaA08g20230D	0	0	0	0	-4.58124	0
BnaC03g01430D	0	-2.05652	0	0	-3.26073	0
BnaC03g23030D	0	0	0	0	-3.20335	0
BnaA03g37560D	0	0	0	0	5.13422	6.76654
BnaA07g19700D	0	0	0	0	5.38456	6.79251
BnaA05g14020D	0	0	0	0	5.28224	6.82628
BnaC07g28380D	0	0	0	0	4.35736	5.75759
BnaA02g07080D	0	0	0	0	4.90786	6.16643
BnaA08g31700D	0	0	0	0	4.73897	6.32581
BnaC05g00310D	0	0	0	0	4.24563	5.28019
BnaC05g35890D	0	0	0	0	4.21948	5.52855
BnaC08g49130D	0	0	0	0	0	8.00256
BnaA06g27700D	0	0	0	0	3.96218	4.98927
BnaCnng62360D	0	0	0	0	3.73999	5.03343
BnaA06g23180D	0	0	0	0	3.76067	5.04203
BnaCnng14120D	0	0	0	0	3.74026	5.14222
BnaCnng06010D	0	0	0	0	0	7.38247
BnaA09g38810D	0	0	0	0	0	7.45237
BnaA02g29650D	0	0	0	0	0	7.50967
BnaA03g28130D	0	0	0	0	0	7.58138
BnaA03g11060D	0	0	0	0	3.39437	4.51294
BnaC06g28370D	0	0	0	0	3.07181	4.53913
BnaA02g10360D	0	0	0	0	3.28145	4.75448
BnaA01g25310D	0	0	0	0	3.59454	4.8118
BnaC03g06790D	0	0	0	0	3.50935	4.87403
BnaCnng40600D	0	0	0	0	0	6.13142
BnaC08g32060D	0	0	0	0	0	6.13323
BnaA01g33270D	0	0	0	0	0	6.16201
BnaA02g20090D	0	0	0	0	0	6.16203
BnaA08g25390D	0	0	0	0	0	6.16373
BnaC08g48010D	0	0	0	0	0	6.2333
BnaA07g19230D	0	0	0	0	0	6.2578
BnaC02g35900D	0	0	0	0	0	6.2621
BnaA05g18860D	0	0	0	0	0	6.27123
BnaA05g27390D	0	0	0	0	0	6.27839
BnaAnng02720D	0	0	0	0	0	6.27964
BnaC08g01590D	0	0	0	0	0	6.2849
BnaC02g32690D	0	0	0	0	0	6.29147
BnaC04g45990D	0	0	0	0	0	6.29187
BnaC08g42150D	0	0	0	0	0	6.29529
BnaC07g50340D	0	0	0	0	0	6.30995
BnaA04g18240D	0	0	0	0	0	6.31467
BnaUnng03380D	0	0	0	0	0	6.32196
BnaA07g32910D	0	0	0	0	0	6.32261
BnaA07g31360D	0	0	0	0	0	6.34949
BnaA03g25700D	0	0	0	0	0	6.35519
BnaA10g20490D	0	0	0	0	0	6.42007
BnaA03g27580D	0	0	0	0	0	6.42258
BnaC08g33320D	0	0	0	0	0	6.43118
BnaA06g28050D	0	0	0	0	0	6.4313
BnaA03g06060D	0	0	0	0	0	6.4474
BnaA05g33280D	0	0	0	0	0	6.45537
BnaCnng17400D	0	0	0	0	0	6.46967
BnaA09g07000D	0	0	0	0	0	6.50359
BnaA03g41800D	0	0	0	0	0	6.52805
BnaC01g32740D	0	0	0	0	0	6.55356
BnaA07g04970D	0	0	0	0	0	6.58742
BnaA09g00690D	0	0	0	0	0	6.59472
BnaCnng17930D	0	0	0	0	0	6.64723
BnaAnng15700D	0	0	0	0	0	6.66115
BnaC03g21230D	0	0	0	0	0	6.67447
BnaC05g41510D	0	0	0	0	0	6.68555
BnaC07g11050D	0	0	0	0	0	6.68709
BnaA02g31020D	0	0	0	0	0	6.73085
BnaA03g38350D	0	0	0	0	0	6.7698
BnaC05g10990D	0	0	0	0	0	6.77374
BnaC04g13100D	0	0	0	0	0	6.81285
BnaA03g13510D	0	0	0	0	0	6.81577
BnaCnng39520D	0	0	0	0	0	6.81807
BnaC09g38230D	0	0	0	0	0	6.81815
BnaA09g53530D	0	0	0	0	0	6.82017
BnaC04g50020D	0	0	0	0	0	6.83656
BnaCnng52530D	0	0	0	0	0	6.85971
BnaA04g18610D	0	0	0	0	0	6.87938
BnaA03g16500D	0	0	0	0	0	6.88241
BnaA08g02640D	0	0	0	0	0	6.89669
BnaC08g09430D	0	0	0	0	0	6.89695
BnaA08g31690D	0	0	0	0	0	6.9029
BnaC04g21430D	0	0	0	0	0	6.91645
BnaAnng32640D	0	0	0	0	0	6.9417
BnaA01g21610D	0	0	0	0	0	6.94292
BnaC09g41430D	0	0	0	0	0	6.96831
BnaA04g23580D	0	0	0	0	0	6.97332
BnaA01g01260D	0	0	0	0	0	6.97513
BnaC01g20450D	0	0	0	0	0	6.98665
BnaCnng65620D	0	0	0	0	0	6.99084
BnaA03g15420D	0	0	0	0	0	7.00942
BnaA09g30960D	0	0	0	0	0	7.01039
BnaC01g40450D	0	0	0	0	0	7.06969
BnaC02g37670D	0	0	0	0	0	7.08877
BnaC01g02280D	0	0	0	0	0	7.1698
BnaA05g37460D	0	0	0	0	0	7.19806
BnaA08g10070D	0	0	0	0	0	7.22009
BnaC07g46420D	0	0	0	0	1.75645	4.00801
BnaC04g52990D	0	0	0	0	1.75952	4.15057
BnaA09g19780D	0	0	0	0	0	4.28472
BnaC09g38510D	0	0	0	0	0	4.32128
BnaA01g19040D	0	0	0	0	0	4.34455
BnaA03g05250D	0	0	0	0	0	4.37399
BnaUnng03950D	0	0	0	0	0	4.38129
BnaA02g08880D	0	0	0	0	0	4.39135
BnaAnng37370D	0	0	0	0	0	4.41358
BnaA01g04120D	0	0	0	0	0	4.42711
BnaA07g17280D	0	0	0	0	0	4.45236
BnaCnng07860D	0	0	0	0	0	4.4877
BnaA03g28780D	0	0	0	0	0	4.50201
BnaC05g30810D	0	0	0	0	0	4.51972
BnaC08g41860D	0	0	0	0	0	4.54543
BnaC09g31990D	0	0	0	0	0	4.5472
BnaC04g21290D	0	0	0	0	0	4.5973
BnaA08g00950D	0	0	0	0	0	4.65943
BnaA01g15040D	0	0	0	0	0	4.66202
BnaC03g34440D	0	0	0	0	0	4.66659
BnaC03g13800D	0	0	0	0	0	4.73506
BnaC05g37320D	0	0	0	0	0	4.74555
BnaC08g23690D	0	0	0	0	0	4.7628
BnaC02g33350D	0	0	0	0	0	4.80268
BnaA08g31640D	0	0	0	0	0	4.80588
BnaA03g43350D	0	0	0	0	0	4.89967
BnaC04g06780D	0	0	0	0	0	4.94885
BnaA03g03340D	0	0	0	0	0	4.96334
BnaC07g43210D	0	0	0	0	0	4.99297
BnaA02g33450D	0	0	0	0	0	5.03369
BnaCnng06140D	0	0	0	0	0	5.05407
BnaA04g26440D	0	0	0	0	0	5.07725
BnaAnng35930D	0	0	0	0	0	5.10497
BnaA09g17180D	0	0	0	0	0	5.1128
BnaA06g29230D	0	0	0	0	0	5.13223
BnaC08g06180D	0	0	0	0	0	5.16066
BnaA05g01460D	0	0	0	0	0	5.18967
BnaA06g17770D	0	0	0	0	0	5.28925
BnaA07g08200D	0	0	0	0	0	5.30839
BnaC08g36160D	0	0	0	0	0	5.3749
BnaA01g21090D	0	0	0	0	0	5.39013
BnaA10g17960D	0	0	0	0	0	5.40416
BnaC03g13830D	0	0	0	0	0	5.43948
BnaC08g32350D	0	0	0	0	0	5.49244
BnaC08g27500D	0	0	0	0	0	5.51813
BnaA07g28890D	0	0	0	0	0	5.55665
BnaA08g07080D	0	0	0	0	0	5.6442
BnaC04g52260D	0	0	0	0	0	5.67117
BnaC03g25670D	0	0	0	0	0	5.69807
BnaC04g50470D	0	0	0	0	0	5.74548
BnaA04g19460D	0	0	0	0	0	5.74933
BnaC04g02260D	0	0	0	0	0	5.77589
BnaA09g54450D	0	0	0	0	0	5.78725
BnaC06g37490D	0	0	0	0	0	5.7968
BnaCnng52010D	0	0	0	0	0	5.80667
BnaC09g19870D	0	0	0	0	0	5.81563
BnaA06g01900D	0	0	0	0	0	5.83269
BnaAnng02900D	0	0	0	0	0	5.83761
BnaA09g40510D	0	0	0	0	0	5.84007
BnaA07g37210D	0	0	0	0	0	5.84866
BnaA07g36770D	0	0	0	0	0	5.8949
BnaCnng46190D	0	0	0	0	0	5.90929
BnaA06g28420D	0	0	0	0	0	5.91491
BnaCnng43540D	0	0	0	0	0	5.93375
BnaA03g53200D	0	0	0	0	0	5.97254
BnaA01g33910D	0	0	0	0	0	6.00508
BnaC03g16390D	0	0	0	0	0	6.013
BnaC04g22130D	0	0	0	0	0	6.02164
BnaC07g29340D	0	0	0	0	0	6.02857
BnaA04g17590D	0	0	0	0	0	6.03466
BnaC04g56270D	0	0	0	0	0	6.03905
BnaC02g02780D	0	0	0	0	0	6.06448
BnaA02g11540D	0	0	0	0	0	6.06805
BnaA08g19840D	0	0	0	0	0	6.07009
BnaC07g22020D	0	0	0	0	0	6.09029
BnaA07g15460D	0	0	0	0	0	6.10784
BnaA04g19510D	0	0	0	0	0	6.11185
BnaA05g22940D	0	0	0	0	0	6.12159
BnaA09g53050D	0	0	0	0	0	3.92939
BnaC01g18970D	0	0	0	0	0	3.95368
BnaCnng12800D	0	0	0	0	0	3.99419
BnaA02g26590D	0	0	0	0	0	3.99808
BnaC08g17880D	0	0	0	0	0	4.05696
BnaA02g00140D	0	0	0	0	0	4.07033
BnaC07g29210D	0	0	0	0	0	4.07087
BnaA03g17850D	0	0	0	0	0	4.09119
BnaA05g06750D	0	0	0	0	0	4.09467
BnaC08g04570D	0	0	0	0	0	4.09614
BnaC01g39350D	0	0	0	0	0	4.12833
BnaA03g56770D	0	0	0	0	0	4.17561
BnaA09g22150D	0	0	0	0	0	4.19446
BnaC03g06930D	0	0	0	0	0	4.21064
BnaA02g02490D	0	0	0	0	0	4.23999
BnaCnng13110D	0	0	0	0	0	4.2454
BnaC05g15020D	0	0	0	0	0	3.77825
BnaA01g13620D	0	0	0	0	0	3.77903
BnaA05g22600D	0	0	0	0	0	3.79008
BnaA09g13330D	0	0	0	0	0	3.81797
BnaC02g45610D	0	0	0	0	0	3.81828
BnaA07g26300D	0	0	0	0	0	3.82096
BnaC01g37690D	0	0	0	0	0	3.82657
BnaC04g15570D	0	0	0	0	0	3.72324
BnaA05g19830D	0	0	0	0	0	3.72538
BnaCnng07580D	0	0	0	0	0	3.74373
BnaC01g42000D	0	0	0	0	0	3.70486
BnaA07g20240D	0	0	0	0	0	3.69153
BnaC07g38360D	0	0	0	0	0	3.69294
BnaAnng21760D	0	0	2.42046	0	2.28289	3.2107
BnaA06g02960D	0	0	2.53783	0	2.36192	2.24329
BnaC03g11570D	0	0	0	0	2.9581	3.19203
BnaA02g06790D	0	0	0	0	3.21558	3.31338
BnaC09g30100D	0	0	0	0	2.90138	3.36412
BnaA07g14070D	0	0	0	0	2.78791	3.36431
BnaA08g23020D	0	0	0	0	2.82686	3.4025
BnaA01g29290D	0	0	0	0	2.84686	3.4224
BnaC09g06860D	0	0	0	0	3.57329	3.43662
BnaC07g45900D	0	0	0	0	3.10012	3.88815
BnaC09g30110D	0	0	0	0	3.13436	3.93731
BnaA09g36180D	0	0	0	2.54363	2.04867	0
BnaA08g01830D	0	0	0	2.43479	2.11818	0
BnaC09g24050D	0	0	0	2.25597	2.19988	0
BnaC01g04860D	0	0	0	1.93237	2.35548	0
BnaA09g21860D	0	0	0	2.1364	2.37566	0
BnaA08g21940D	0	0	0	0	4.1009	0
BnaA08g11740D	0	0	0	1.84153	1.74621	1.26167
BnaC03g66270D	0	0	0	1.56389	1.8046	1.39734
BnaC03g27140D	0	0	0	1.69506	1.78287	1.78258
BnaA04g05470D	0	0	0	0	2.81232	2.29461
BnaA03g23010D	0	0	0	0	2.53627	2.69493
BnaC04g28220D	0	0	0	0	3.01742	2.81805
BnaC09g16820D	0	0	0	0	2.85443	2.87845
BnaC07g08430D	0	0	0	0	2.61465	2.93178
BnaA09g41810D	0	0	0	0	2.60522	3.01696
BnaC02g34540D	0	0	0	0	2.41654	3.14747
BnaC05g10770D	0	0	0	0	2.27955	3.15228
BnaAnng19370D	0	0	0	0	2.68994	3.20525
BnaC02g36110D	0	0	0	0	2.29259	3.26733
BnaC02g06930D	0	0	0	0	2.5451	3.31524
BnaC01g36720D	0	0	0	0	2.47873	3.54887
BnaC08g49480D	0	0	0	2.25238	1.84545	0
BnaA09g36820D	0	0	0	1.75243	2.0087	0
BnaC03g73930D	0	0	0	0	3.03262	0
BnaA01g19870D	0	0	0	1.6747	1.59141	1.08724
BnaC07g43490D	0	0	0	0	2.58761	1.73864
BnaA02g34140D	0	0	0	0	2.47069	1.7982
BnaA06g09880D	0	0	0	0	2.7367	1.81951
BnaC06g37510D	0	0	0	0	2.48593	1.92087
BnaA03g15380D	0	0	0	0	2.45579	2.01632
BnaA09g30760D	0	0	0	0	2.41098	2.05968
BnaC09g35160D	0	0	0	0	2.38379	2.12503
BnaA05g10700D	0	0	0	0	2.58414	2.12736
BnaAnng32610D	0	0	0	0	2.2755	2.25902
BnaC03g62800D	0	0	0	1.58127	1.34793	2.27562
BnaC01g17710D	0	0	0	0	2.13214	2.28293
BnaA03g07740D	0	1.42828	1.61142	0	1.40302	2.29187
BnaC08g25010D	0	0	0	0	2.255	2.30578
BnaA06g22060D	0	0	0	0	2.1876	2.3542
BnaA04g00630D	0	0	0	1.54018	1.28589	2.38258
BnaA03g48570D	0	0	0	0	2.35744	2.44479
BnaCnng47130D	0	0	0	0	2.11291	2.47065
BnaA10g08320D	0	0	0	0	2.44612	2.51569
BnaC03g52390D	0	0	0	0	2.0159	2.52171
BnaC09g11350D	0	0	0	0	2.07687	2.56334
BnaA06g09070D	0	1.67551	0	0	1.68973	2.57132
BnaA03g15750D	0	0	0	0	2.32519	2.61736
BnaC05g36000D	0	1.92505	0	0	1.77714	2.66951
BnaA09g35450D	0	0	0	0	2.04769	2.71045
BnaC06g15040D	0	0	0	0	1.91785	2.72182
BnaC09g36590D	0	0	0	0	1.92001	2.75029
BnaC07g24080D	0	0	0	0	1.94814	2.75675
BnaC07g22090D	0	0	0	0	1.97585	2.78126
BnaCnng70940D	0	0	0	0	2.15048	2.79967
BnaA08g17380D	0	0	0	0	1.9627	2.80142
BnaC08g13980D	0	0	0	0	1.95662	2.80359
BnaC09g26890D	0	0	0	0	2.40553	2.84267
BnaAnng09500D	0	0	0	0	2.27672	2.85655
BnaC02g42100D	0	0	0	0	1.972	2.86509
BnaC01g07540D	0	0	0	0	1.99816	2.87484
BnaA09g43130D	0	0	0	0	2.29428	2.94488
BnaC02g09510D	0	1.48705	0	0	1.50246	2.94911
BnaA07g38550D	0	0	0	0	1.79588	2.97044
BnaA08g07360D	0	0	0	0	1.89857	2.99601
BnaC03g39170D	0	0	0	0	1.96843	3.11206
BnaC06g21970D	0	0	0	0	1.89948	3.11296
BnaAnng08350D	0	0	0	0	1.92394	3.13885
BnaC08g08210D	0	0	0	0	2.07101	3.32737
BnaAnng17910D	0	0	0	0	1.63178	3.34842
BnaA09g51620D	0	0	0	0	1.81222	3.49712
BnaA04g10650D	0	0	0	1.93069	1.43458	0
BnaA09g47910D	0	0	0	0	2.29839	0
BnaC03g58590D	0	0	0	0	2.41082	0
BnaA05g34540D	0	0	0	0	2.51046	0
BnaC05g21480D	0	0	0	0	2.75856	0
BnaA09g18500D	0	0	0	0	1.96759	1.28068
BnaA04g09500D	0	0	0	0	2.2869	1.35257
BnaA01g12340D	0	0	0	0	1.94641	1.54414
BnaCnng72960D	0	0	0	0	1.91762	1.54936
BnaA10g12780D	0	0	0	0	2.17351	1.59153
BnaC05g17480D	0	0	0	0	2.13914	1.61387
BnaC08g48340D	0	0	0	0	2.17908	1.63565
BnaA08g22720D	0	0	0	0	1.90086	1.63923
BnaA07g35800D	0	0	0	0	1.78645	1.71367
BnaA05g27280D	0	0	0	0	1.65489	1.71747
BnaA06g35100D	0	0	0	0	1.97651	1.76837
BnaA06g21470D	0	0	0	0	1.76592	1.7767
BnaA09g07140D	0	0	0	0	1.87232	1.82386
BnaA04g20720D	0	0	0	0	1.83139	1.84423
BnaA03g55860D	0	0	0	0	1.64113	1.89901
BnaA02g13820D	0	0	0	0	1.78646	1.90093
BnaA10g12720D	0	0	0	0	1.67513	1.91253
BnaUnng00020D	0	0	0	0	1.70658	1.91596
BnaA02g06880D	0	0	0	0	1.87664	1.91717
BnaC08g19730D	0	0	0	0	2.06247	1.92105
BnaCnng30830D	0	0	0	0	1.71268	1.92274
BnaA08g13650D	0	0	0	0	1.59587	1.97571
BnaC03g23130D	0	0	0	0	1.58917	1.98997
BnaC08g07580D	0	0	0	0	2.18867	2.02286
BnaC09g45790D	0	0	0	0	1.60823	2.0931
BnaC06g31180D	0	0	0	0	2.01285	2.10869
BnaA08g25990D	0	0	0	0	1.51319	2.1195
BnaAnng04790D	0	0	0	0	2.02632	2.1212
BnaC08g42830D	0	0	0	0	1.73787	2.16092
BnaC02g34840D	0	0	0	0	1.47277	2.16213
BnaA03g09530D	0	0	0	0	1.77953	2.18058
BnaC03g13600D	0	1.5779	0	0	1.32167	2.21837
BnaC08g21320D	0	0	0	0	1.68501	2.22656
BnaA09g03100D	0	0	0	0	1.72502	2.24947
BnaA03g01040D	0	1.46849	0	0	1.33922	2.28325
BnaC03g52400D	0	0	0	0	1.92488	2.29426
BnaA01g15000D	0	0	0	0	1.94946	2.29772
BnaC02g37260D	0	0	0	0	1.79785	2.29872
BnaA05g33490D	0	0	0	0	1.4899	2.30261
BnaC02g04560D	0	0	0	0	1.66206	2.31365
BnaCnng73290D	0	0	0	0	1.93718	2.32158
BnaA02g27010D	0	1.82509	0	0	1.63254	2.32169
BnaC03g40170D	0	0	0	0	1.46301	2.32663
BnaCnng58090D	0	0	0	0	1.87215	2.33509
BnaC03g58870D	0	0	0	0	1.80151	2.33712
BnaC02g27050D	0	0	0	0	1.54644	2.36386
BnaA10g23820D	0	0	0	0	1.51419	2.36609
BnaA10g17590D	0	0	0	0	1.70567	2.43109
BnaC03g78270D	0	0	0	0	1.87314	2.47262
BnaA03g01150D	0	0	0	0	1.52986	2.48447
BnaA07g21490D	0	0	0	0	1.67965	2.48849
BnaA10g12960D	0	0	0	0	1.68389	2.5093
BnaC05g48240D	0	0	0	0	1.81987	2.52513
BnaCnng39320D	0	0	0	0	1.55204	2.52818
BnaAnng20740D	0	0	0	0	1.751	2.55361
BnaC08g46740D	0	0	0	0	1.78325	2.58796
BnaC04g55020D	0	0	0	0	1.64635	2.60632
BnaCnng29300D	0	0	0	0	1.69631	2.60682
BnaA09g31110D	0	0	0	0	1.59754	2.6074
BnaAnng29030D	0	0	0	0	1.59073	2.62845
BnaC05g09920D	0	0	0	0	1.55381	2.64939
BnaA06g17850D	0	0	0	0	1.87071	2.6634
BnaC06g23720D	0	0	0	0	1.90699	2.6874
BnaC03g48070D	0	0	0	0	1.66626	2.75892
BnaA06g25550D	0	0	0	0	1.59345	2.80079
BnaA04g26460D	0	0	0	0	1.60459	2.91497
BnaAnng27200D	0	0	0	0	1.73433	0
BnaA04g18040D	0	0	0	0	1.74833	0
BnaC02g35530D	0	0	0	0	1.76468	0
BnaCnng27960D	0	0	0	0	1.80382	0
BnaC07g14830D	0	0	0	0	1.81292	0
BnaCnng05510D	0	0	0	0	1.82102	0
BnaC07g48760D	0	0	0	0	1.84668	0
BnaC01g24660D	0	0	0	0	1.95839	0
BnaC08g26910D	0	0	0	0	2.04794	0
BnaA06g23600D	0	0	0	0	2.05989	0
BnaA03g51590D	0	0	0	0	2.06542	0
BnaA06g35120D	0	0	0	0	2.09088	0
BnaA07g12410D	0	0	0	0	2.14249	0
BnaC04g43980D	0	0	0	0	2.15081	0
BnaA04g19600D	0	0	0	0	2.22453	0
BnaA01g28690D	0	0	0	0	2.26994	0
BnaC06g31880D	0	0	0	0	1.64505	1.06579
BnaA08g17810D	0	0	0	0	1.29642	1.12584
BnaA07g35790D	0	0	0	0	1.81616	1.13099
BnaA09g42610D	0	0	0	0	1.38503	1.15994
BnaC03g30070D	0	0	0	0	1.33498	1.16298
BnaA05g24160D	0	0	0	0	1.45607	1.1656
BnaA06g11320D	0	0	0	0	1.63402	1.17149
BnaC07g25020D	0	0	0	0	1.7649	1.1842
BnaA01g06730D	0	0	0	0	1.41184	1.18801
BnaAnng14710D	0	0	0	0	1.61636	1.24032
BnaC07g42640D	0	0	0	0	1.58323	1.24397
BnaA10g18690D	0	0	0	0	1.68617	1.27732
BnaC08g17460D	0	0	0	0	1.40399	1.28066
BnaA06g31640D	0	0	0	0	1.56614	1.28904
BnaC07g30390D	0	0	0	0	1.30277	1.31059
BnaC09g44950D	0	0	0	0	1.20866	1.31989
BnaA08g24480D	0	0	0	0	1.45117	1.32108
BnaA05g23160D	0	0	0	0	1.66029	1.32865
BnaC02g43000D	0	0	0	0	1.64396	1.3456
BnaA02g34090D	0	0	0	0	1.20798	1.42475
BnaA05g24830D	0	0	0	0	1.43012	1.4273
BnaA03g25630D	0	0	0	0	1.5608	1.45563
BnaC07g44740D	0	0	0	0	1.50143	1.45727
BnaC04g34480D	0	0	0	0	1.33729	1.46369
BnaA03g50900D	0	0	0	0	1.30419	1.46423
BnaC01g11450D	0	0	0	0	1.19831	1.49497
BnaC05g19630D	0	0	0	0	1.34805	1.49612
BnaA09g48680D	0	0	0	0	1.505	1.49757
BnaC08g21160D	0	0	0	0	1.57907	1.5093
BnaA07g28840D	0	0	0	0	1.74283	1.51587
BnaC03g18590D	0	0	0	0	1.63774	1.52823
BnaA02g07040D	0	0	0	0	1.63877	1.54098
BnaC06g14100D	0	0	0	0	1.55674	1.55602
BnaC03g41310D	0	0	0	0	1.38773	1.64742
BnaAnng29590D	0	0	0	0	1.63169	1.64758
BnaA09g25690D	0	0	0	0	1.38141	1.64791
[truncated: 338 more rows]

## Sheet: up-regulated PI specific
Bna_gene_id	UP	PILFD2	PILFD5	PILFD10	PILFD20	PILFD30
BnaA08g18440D	0	2.51356	0	0	2.62476	3.66267
BnaC04g21470D	0	0	0	0	5.1919	0
BnaC02g14450D	0	0	0	0	2.55902	3.95623
BnaA04g13950D	0	0	0	0	2.66333	4.00824
BnaC02g26030D	0	0	0	0	3.94595	0
BnaCnng41760D	0	0	0	0	2.80737	2.70886
BnaA09g04550D	0	0	0	0	2.60805	3.33619
BnaC03g33900D	0	0	0	0	2.14057	3.75592
BnaA09g15260D	0	0	0	0	2.291	2.84064
BnaC09g33280D	0	0	0	0	1.98035	3.0581
BnaA05g23330D	0	0	0	0	2.1488	3.08379
BnaC04g07070D	0	0	0	0	2.1445	3.19139
BnaC01g13370D	0	0	0	0	1.64755	3.48954
BnaA03g53730D	0	0	0	0	1.65481	3.68694
BnaC02g35980D	0	0	0	0	1.77879	3.688
BnaC03g60970D	0	0	0	0	2.44197	0
BnaA03g39450D	0	0	0	0	2.44422	0
BnaC02g22640D	0	0	0	0	2.47477	0
BnaC06g37650D	0	0	0	0	2.69975	0
BnaC06g05930D	0	0	0	0	2.87291	0
BnaC06g12460D	0	0	0	0	2.11885	1.5176
BnaA06g28070D	0	0	0	0	1.83467	1.60486
BnaC01g31340D	0	0	0	0	1.77389	1.67578
BnaA09g11070D	0	0	0	0	2.28216	1.69135
BnaCnng40210D	0	0	0	0	1.99439	1.71846
BnaC06g05910D	0	0	0	0	1.78549	1.78743
BnaC06g05920D	0	0	0	0	2.15987	1.92037
BnaC06g35790D	0	0	0	0	1.61419	2.203
BnaA03g22420D	0	0	0	0	1.85104	2.304
BnaA04g00410D	0	0	0	0	1.55708	2.50498
BnaA07g32420D	0	0	0	0	1.63548	2.90045
BnaC07g43320D	0	0	0	0	1.75777	0
BnaA08g00970D	0	0	0	0	1.78551	0
BnaC03g77080D	0	0	0	0	1.81341	0
BnaA01g29390D	0	0	0	0	1.9123	0
BnaCnng47740D	0	0	0	0	2.00711	0
BnaC03g24290D	0	0	0	0	2.09751	0
BnaC01g18570D	0	0	0	0	1.36097	1.08286
BnaC08g28520D	0	0	0	0	1.42938	1.08444
BnaA02g04080D	0	0	0	0	1.41594	1.12388
BnaC03g52080D	0	0	0	0	1.41773	1.21103
BnaA10g18700D	0	0	0	0	1.40253	1.24715
BnaC04g43540D	0	0	0	0	1.27682	1.25155
BnaA04g13570D	0	0	0	0	1.26095	1.2833
BnaA05g25600D	0	0	0	0	1.75389	1.28515
BnaCnng10920D	0	0	0	0	1.32233	1.30633
BnaC07g33400D	0	0	0	0	1.47116	1.30705
BnaA04g17100D	0	0	0	0	1.29797	1.30939
BnaA10g12460D	0	0	0	0	1.78702	1.33129
BnaC08g42940D	0	0	0	0	1.22255	1.33976
BnaC03g49860D	0	0	0	0	1.33603	1.35532
BnaC07g40860D	0	0	0	0	1.42538	1.39251
BnaC09g42430D	0	0	0	0	1.33672	1.40314
BnaC07g25000D	0	0	0	0	1.32496	1.43364
BnaC03g73490D	0	0	0	0	1.15797	1.47926
BnaC03g12050D	0	0	0	0	1.73077	1.47992
BnaA03g12500D	0	0	0	0	1.71627	1.50082
BnaCnng64970D	0	0	0	0	1.49414	1.50679
BnaA09g36860D	0	0	0	0	1.24922	1.52651
BnaA05g00790D	0	0	0	0	1.18715	1.52896
BnaC02g16530D	0	0	0	0	1.65677	1.54142
BnaC08g35060D	0	0	0	0	1.58868	1.55215
BnaA01g21220D	0	0	0	0	1.21267	1.58049
BnaC03g52210D	0	0	0	0	1.65266	1.71114
BnaA07g28470D	0	0	0	0	1.46096	1.72546
BnaC03g58140D	0	0	0	0	1.56427	1.72691
BnaC08g13120D	0	0	0	0	1.27738	1.74615
BnaA03g43580D	0	0	0	0	1.11675	1.75703
BnaC04g54340D	0	0	0	0	1.43783	1.75752
BnaC05g13120D	0	0	0	0	1.3063	1.80679
BnaCnng18530D	0	0	0	0	1.25238	1.8084
BnaA01g31320D	0	0	0	0	1.32735	1.8521
BnaC03g21720D	0	0	0	0	1.11652	1.90462
BnaA08g26630D	0	0	0	0	1.30039	1.99424
BnaC03g59660D	0	0	0	0	1.35381	2.25247
BnaA01g06120D	0	0	0	0	1.15017	0
BnaC04g11770D	0	0	0	0	1.16414	0
BnaCnng68320D	0	0	0	0	1.18613	0
BnaC01g21110D	0	0	0	0	1.20151	0
BnaA07g16850D	0	0	0	0	1.21507	0
BnaC05g01140D	0	0	0	0	1.23551	0
BnaC05g50840D	0	0	0	0	1.24544	0
BnaCnng08530D	0	0	0	0	1.25091	0
BnaC03g55440D	0	0	0	0	1.25189	0
BnaA07g19610D	0	0	0	0	1.25619	0
BnaC04g50920D	0	0	0	0	1.31451	0
BnaC07g42210D	0	0	0	0	1.32076	0
BnaC03g10000D	0	0	0	0	1.32688	0
BnaA03g36810D	0	0	0	0	1.38813	0
BnaA01g03580D	0	0	0	0	1.4061	0
BnaCnng12090D	0	0	0	0	1.47576	0
BnaC08g19190D	0	0	0	0	1.50229	0
BnaAnng26220D	0	0	0	0	1.5125	0
BnaA05g28580D	0	0	0	0	1.55161	0
BnaC03g45470D	0	0	0	0	1.55309	0
BnaC05g33170D	0	0	0	0	1.55711	0
BnaA04g10600D	0	0	0	0	1.57335	0
BnaA06g30520D	0	0	0	0	1.58193	0
BnaA06g14660D	0	0	0	0	1.60077	0
BnaC04g32870D	0	0	0	0	1.60615	0
BnaA04g11180D	0	0	0	0	1.65471	0
BnaC05g11500D	0	0	0	0	1.68105	0
BnaC08g17490D	0	0	0	0	1.70039	0
BnaA10g25550D	0	0	0	0	1.15413	1.13708
BnaC05g38860D	0	0	0	0	1.08276	1.21128
BnaC06g24500D	0	0	0	0	1.12664	1.21885
BnaA01g35910D	0	0	0	0	1.11284	1.31668
BnaC09g46280D	0	0	0	0	1.18313	1.34229
BnaC04g42420D	0	0	0	0	1.12301	1.3854
BnaA03g24410D	0	0	0	0	1.12833	1.39577
BnaC09g39490D	0	0	0	0	1.16106	1.39715
BnaAnng17540D	0	0	0	0	1.16498	1.42778
BnaA03g19320D	0	0	0	0	1.08737	1.71518
BnaA03g06680D	0	0	0	0	1.06109	1.85833
BnaAnng01320D	0	0	0	0	3.97479	4.06648
BnaC04g34700D	0	0	0	0	1.04755	0
BnaC05g11840D	0	0	0	0	0	1.93856
BnaA07g35620D	0	0	0	0	0	1.94914
BnaA10g10890D	0	0	0	0	0	1.98401
BnaA03g08910D	0	0	0	0	0	1.98469
BnaA06g03190D	0	0	0	0	0	2.0238
BnaA04g19010D	0	0	0	0	0	2.04607
BnaC03g42960D	0	0	0	0	0	2.04961
BnaA07g11880D	0	0	0	0	0	2.06199
BnaC06g32660D	0	0	0	0	0	2.06875
BnaA08g26530D	0	0	0	0	0	2.07331
BnaC05g07040D	0	0	0	0	0	2.08114
BnaCnng10250D	0	0	0	0	0	2.1084
BnaA06g09160D	0	0	0	0	0	2.12917
BnaA01g01350D	0	0	0	0	0	2.16737
BnaA09g50710D	0	0	0	0	0	2.18413
BnaC02g36630D	0	0	0	0	0	2.18952
BnaC02g08040D	0	0	0	0	0	2.19119
BnaC03g60110D	0	0	0	0	0	2.22353
BnaC08g30420D	0	0	0	0	0	2.24312
BnaA02g08060D	0	0	0	0	0	2.24846
BnaC07g50320D	0	0	0	0	0	2.26889
BnaA06g02780D	0	0	0	0	0	2.26982
BnaC01g04870D	0	0	0	0	0	2.27041
BnaC01g39540D	0	0	0	0	0	2.28645
BnaC09g12240D	0	0	0	0	0	2.30457
BnaC05g25290D	0	0	0	0	0	2.33213
BnaC07g42660D	0	0	0	0	0	2.35773
BnaCnng45270D	0	0	0	0	0	2.38151
BnaC03g16130D	0	0	0	0	0	2.39273
BnaCnng40460D	0	0	0	0	0	2.46409
BnaC03g71660D	0	0	0	0	0	2.49172
BnaC07g13850D	0	0	0	0	0	2.50324
BnaCnng34270D	0	0	0	0	0	2.55026
BnaA06g12220D	0	0	0	0	0	2.55141
BnaA09g48850D	0	0	0	0	0	2.66266
BnaA07g06850D	0	0	0	0	0	2.73254
BnaC03g06660D	0	0	0	0	0	2.77608
BnaA03g34780D	0	0	0	0	0	2.89489
BnaA01g32460D	0	0	0	0	0	2.92979
BnaCnng29240D	0	0	0	0	0	2.9954
BnaC03g36340D	0	0	0	0	0	3.00945
BnaC07g27080D	0	0	0	0	0	3.0107
BnaAnng29660D	0	0	0	0	0	3.04732
BnaC05g29600D	0	0	0	0	0	3.24769
BnaA08g05900D	0	0	0	0	0	3.2692
BnaA08g30750D	0	0	0	0	0	3.34239
BnaC03g43990D	0	0	0	0	0	3.35153
BnaC01g39620D	0	0	0	0	0	3.40704
BnaC08g39000D	0	0	0	0	0	3.49734
BnaC03g40740D	0	0	0	0	0	1.9228
BnaA06g36580D	0	0	0	0	0	1.92343
BnaC02g11170D	0	0	0	0	0	1.92704
BnaA02g03310D	0	0	0	0	0	1.92918
BnaA05g34600D	0	0	0	0	0	1.93262
BnaCnng09040D	0	0	0	0	0	1.9351
BnaA06g00920D	0	0	0	0	0	1.9372
BnaC01g08280D	0	0	0	0	0	1.93849
BnaC03g51800D	0	0	0	0	0	1.9395
BnaA04g24000D	0	0	0	0	0	1.94292
BnaA06g05290D	0	0	0	0	0	1.94565
BnaA01g29600D	0	0	0	0	0	1.94586
BnaA01g14690D	0	0	0	0	0	1.9488
BnaA09g27190D	0	0	0	0	0	1.95034
BnaA06g04160D	0	0	0	0	0	1.95324
BnaC08g25180D	0	0	0	0	0	1.9537
BnaA04g20020D	0	0	0	0	0	1.958
BnaCnng02620D	0	0	0	0	0	1.95913
BnaC07g29150D	0	0	0	0	0	1.96218
BnaA07g25980D	0	0	0	0	0	1.96248
BnaA06g09650D	0	0	0	0	0	1.96358
BnaC03g16040D	0	0	0	0	0	1.96991
BnaC03g39680D	0	0	0	0	0	1.97483
BnaA08g13980D	0	0	0	0	0	1.97557
BnaA08g04510D	0	0	0	0	0	1.98011
BnaC03g68070D	0	0	0	0	0	1.981
BnaCnng36750D	0	0	0	0	0	1.98983
BnaC07g06930D	0	0	0	0	0	1.99
BnaC09g51700D	0	0	0	0	0	1.993
BnaA06g31180D	0	0	0	0	0	1.99359
BnaC08g33450D	0	0	0	0	0	1.99735
BnaA03g34920D	0	0	0	0	0	1.99782
BnaA02g30680D	0	0	0	0	0	2.00105
BnaA03g09250D	0	0	0	0	0	2.002
BnaA10g02500D	0	0	0	0	0	2.00541
BnaC08g32020D	0	0	0	0	0	2.01013
BnaA03g36620D	0	0	0	0	0	2.01059
BnaCnng57900D	0	0	0	0	0	2.01394
BnaC04g21660D	0	0	0	0	0	2.01487
BnaC02g41110D	0	0	0	0	0	2.01936
BnaA09g19770D	0	0	0	0	0	2.01944
BnaA03g13140D	0	0	0	0	0	2.02055
BnaC05g15340D	0	0	0	0	0	2.02208
BnaA02g01140D	0	0	0	0	0	2.02261
BnaC08g48080D	0	0	0	0	0	2.02318
BnaC07g05690D	0	0	0	0	0	2.02509
BnaC04g39750D	0	0	0	0	0	2.02946
BnaC02g04270D	0	0	0	0	0	2.02994
BnaA09g40640D	0	0	0	0	0	2.02998
BnaC06g21310D	0	0	0	0	0	2.03071
BnaA06g15270D	0	0	0	0	0	2.03784
BnaA10g22470D	0	0	0	0	0	2.03806
BnaC09g51110D	0	0	0	0	0	2.03958
BnaC03g49210D	0	0	0	0	0	2.0414
BnaCnng25150D	0	0	0	0	0	2.04951
BnaC02g08550D	0	0	0	0	0	2.04972
BnaC02g00890D	0	0	0	0	0	2.05008
BnaC03g18820D	0	2.43985	0	0	0	2.05264
BnaA09g35410D	0	0	0	0	0	2.0534
BnaA05g06830D	0	0	0	0	0	2.06057
BnaC04g37870D	0	0	0	0	0	2.0635
BnaA02g28330D	0	0	0	0	0	2.06757
BnaA07g21340D	0	0	0	0	0	2.068
BnaCnng60520D	0	0	0	0	0	2.07054
BnaC06g15000D	0	0	0	0	0	2.07182
BnaC07g48220D	0	0	0	0	0	2.07236
BnaA09g07300D	0	0	0	0	0	2.0741
BnaA04g05520D	0	0	0	0	0	2.0754
BnaUnng00130D	0	0	0	0	0	2.07691
BnaC06g43160D	0	0	0	0	0	2.08172
BnaC03g09370D	0	0	0	0	0	2.08262
BnaA07g15670D	0	0	0	0	0	2.08713
BnaC03g04520D	0	0	0	0	0	2.08867
BnaA01g29640D	0	0	0	0	0	2.09428
BnaA03g27010D	0	0	0	0	0	2.09498
BnaC04g50860D	0	0	0	0	0	2.09852
BnaC06g34390D	0	0	0	0	0	2.10159
BnaC09g41120D	0	0	0	0	0	2.10535
BnaC09g41570D	0	0	0	0	0	2.10957
BnaC06g17680D	0	0	0	0	0	2.11135
BnaC01g26000D	0	0	0	0	0	2.11303
BnaC07g35060D	0	0	0	0	0	2.11402
BnaC08g45240D	0	0	0	0	0	2.121
BnaC09g46070D	0	0	0	0	0	2.12443
BnaA05g09330D	0	0	0	0	0	2.12752
BnaA01g17710D	0	0	0	0	0	2.12814
BnaCnng04500D	0	0	0	0	0	2.13452
BnaC09g36830D	0	0	0	0	0	2.13496
BnaCnng78190D	0	0	0	0	0	2.14875
BnaC08g01230D	0	0	0	0	0	2.15078
BnaC04g35770D	0	0	0	0	0	2.15554
BnaC04g44230D	0	0	0	0	0	2.16247
BnaCnng13080D	0	0	0	0	0	2.16486
BnaC08g39360D	0	0	0	0	0	2.16955
BnaCnng09890D	0	0	0	0	0	2.17126
BnaC02g05680D	0	0	0	0	0	2.17362
BnaC09g02560D	0	0	0	0	0	2.17444
BnaC04g18260D	0	0	0	0	0	2.17615
BnaC06g03670D	0	0	0	0	0	2.17796
BnaAnng37440D	0	0	0	0	0	2.17872
BnaAnng00240D	0	0	0	0	0	2.18005
BnaCnng09770D	0	0	0	0	0	2.181
BnaC06g43870D	0	0	0	0	0	2.18199
BnaA06g19390D	0	0	0	0	0	2.18203
BnaC03g76850D	0	0	0	0	0	2.19102
BnaA03g24370D	0	0	0	0	0	2.19678
BnaC01g17770D	0	0	0	0	0	2.19762
BnaA05g09010D	0	0	0	0	0	2.19991
BnaC06g36460D	0	0	0	0	0	2.21173
BnaC04g14790D	0	0	0	0	0	2.214
BnaA05g05880D	0	0	0	0	0	2.21475
BnaAnng05850D	0	0	0	0	0	2.21665
BnaAnng03730D	0	0	0	0	0	2.22094
BnaAnng36070D	0	0	0	0	0	2.22215
BnaA05g14600D	0	0	0	0	0	2.22246
BnaA09g09670D	0	0	0	0	0	2.22571
BnaCnng19190D	0	0	0	0	0	2.22941
BnaA02g09450D	0	0	0	0	0	2.23894
BnaC03g71570D	0	0	0	0	0	2.24264
BnaC06g37420D	0	0	0	0	0	2.24415
BnaA02g21750D	0	0	0	0	0	2.24489
BnaC05g13990D	0	0	0	0	0	2.2464
BnaC03g36890D	0	0	0	0	0	2.26088
BnaA06g26710D	0	0	0	0	0	2.26327
BnaA02g27870D	0	0	0	0	0	2.26573
BnaA07g03670D	0	0	0	0	0	2.27421
BnaC06g27930D	0	0	0	0	0	2.27791
BnaA04g17620D	0	0	0	0	0	2.28455
BnaA03g34230D	0	0	0	0	0	2.28475
BnaA06g39520D	0	0	0	0	0	2.29435
BnaA04g15380D	0	0	0	0	0	2.29593
BnaC08g44150D	0	0	0	0	0	2.29721
BnaC01g01450D	0	0	0	0	0	2.29766
BnaCnng02180D	0	0	0	0	0	2.30012
BnaCnng01470D	0	0	0	0	0	2.30136
BnaC08g34610D	0	0	0	0	0	2.30185
BnaA02g16050D	0	0	0	0	0	2.30423
BnaCnng64120D	0	0	0	0	0	2.30568
BnaA03g04530D	0	0	0	0	0	2.31393
BnaC03g49410D	0	0	0	0	0	2.31666
BnaA07g38040D	0	0	0	0	0	2.31813
BnaC06g02550D	0	0	0	0	0	2.33709
BnaA08g03050D	0	0	0	0	0	2.33957
BnaC05g45900D	0	0	0	0	0	2.34113
BnaC01g20970D	0	0	0	0	0	2.34227
BnaA06g31810D	0	0	0	0	0	2.3466
BnaC01g07370D	0	0	0	0	0	2.35575
BnaA06g01670D	0	0	0	0	0	2.36321
BnaC03g44180D	0	0	0	0	0	2.36416
BnaC01g10510D	0	0	0	0	0	2.36895
BnaA07g03270D	0	0	0	0	0	2.38198
BnaA01g13460D	0	0	0	0	0	2.38565
BnaC02g37250D	0	0	0	0	0	2.39111
BnaA05g03390D	0	0	0	0	0	2.39599
BnaA08g14830D	0	0	0	0	0	2.39657
BnaA04g12920D	0	0	0	0	0	2.39714
BnaUnng03420D	0	0	0	0	0	2.40147
BnaA06g26230D	0	0	0	0	0	2.40272
BnaC09g11030D	0	0	0	0	0	2.40684
BnaC05g25310D	0	0	0	0	0	2.40879
BnaC07g10580D	0	0	0	0	0	2.4093
BnaC08g44600D	0	0	0	0	0	2.41814
BnaA05g16820D	0	0	0	0	0	2.42195
BnaC03g48670D	0	0	0	0	0	2.42213
BnaC05g05720D	0	0	0	0	0	2.43211
BnaC07g03580D	0	0	0	0	0	2.44338
BnaAnng11660D	0	0	0	0	0	2.4474
BnaA05g35860D	0	0	0	0	0	2.4501
BnaA02g26420D	0	0	0	0	0	2.45268
BnaA04g20050D	0	0	0	0	0	2.45877
BnaA03g50120D	0	0	0	0	0	2.46497
BnaA03g25640D	0	0	0	0	0	2.47545
BnaC03g05060D	0	0	0	0	0	2.47633
BnaA09g32940D	0	0	0	0	0	2.48611
BnaA06g32540D	0	0	0	0	0	2.48715
BnaC08g17050D	0	0	0	0	0	2.49978
BnaC03g60170D	0	0	0	0	0	2.50525
BnaC04g16900D	0	0	0	0	0	2.50796
BnaC07g20260D	0	0	0	0	0	2.51407
BnaA07g33590D	0	0	0	0	0	2.51538
BnaA05g16170D	0	0	0	0	0	2.5155
BnaA05g12340D	0	0	0	0	0	2.51561
BnaAnng31050D	0	0	0	0	0	2.51829
BnaC07g28690D	0	0	0	0	0	2.51847
BnaA03g30760D	0	0	0	0	0	2.5195
BnaC03g01440D	0	0	0	0	0	2.51985
BnaA10g03670D	0	0	0	0	0	2.52261
BnaA05g34180D	0	0	0	0	0	2.52668
BnaC03g64870D	0	0	0	0	0	2.52671
BnaC08g44210D	0	0	0	0	0	2.52783
BnaC06g01580D	0	0	0	0	0	2.53286
BnaA01g11800D	0	0	0	0	0	2.54539
BnaC07g42580D	0	0	0	0	0	2.55192
BnaC03g16220D	0	0	0	0	0	2.55376
BnaA05g23860D	0	0	0	0	0	2.55386
BnaC05g11890D	0	0	0	0	0	2.56636
BnaA09g31690D	0	0	0	0	0	2.57477
BnaC03g07650D	0	0	0	0	0	2.57533
BnaC06g38200D	0	0	0	0	0	2.57675
BnaA09g42180D	0	0	0	0	0	2.58262
BnaC05g12500D	0	0	0	0	0	2.58722
BnaA09g32240D	0	0	0	0	0	2.58774
BnaA09g48570D	0	0	0	0	0	2.60147
BnaC09g09080D	0	0	0	0	0	2.60289
BnaC03g06070D	0	0	0	0	0	2.60477
BnaC07g43260D	0	0	0	0	0	2.61332
BnaC02g36400D	0	0	0	0	0	2.62521
BnaA03g50190D	0	0	0	0	0	2.63181
BnaC03g01910D	0	0	0	0	0	2.63571
BnaA03g24970D	0	0	0	0	0	2.6383
BnaA02g18370D	0	0	0	0	0	2.6396
BnaA01g34180D	0	0	0	0	0	2.64707
BnaA03g12050D	0	0	0	0	0	2.64958
BnaA05g33400D	0	0	0	0	0	2.65325
BnaC09g08170D	0	0	0	0	0	2.65855
BnaA07g19910D	0	0	0	0	0	2.66611
BnaCnng19230D	0	0	0	0	0	2.67831
BnaA01g20660D	0	0	0	0	0	2.68042
BnaC09g43980D	0	0	0	0	0	2.68665
BnaA01g12020D	0	0	0	0	0	2.68765
BnaA09g41080D	0	0	0	0	0	2.70077
BnaC07g35830D	0	0	0	0	0	2.7008
BnaA01g28970D	0	0	0	0	0	2.70672
BnaUnng02380D	0	0	0	0	0	2.71225
BnaCnng76140D	0	0	0	0	0	2.71875
BnaCnng66250D	0	0	0	0	0	2.71967
BnaA01g13950D	0	0	0	0	0	2.7239
BnaCnng13690D	0	0	0	0	0	2.72418
BnaAnng34060D	0	0	0	0	0	2.74416
BnaA06g40890D	0	0	0	0	0	2.75057
BnaA07g36520D	0	0	0	0	0	2.75536
BnaC09g16770D	0	0	0	0	0	2.76244
BnaAnng31310D	0	0	0	0	0	2.76523
BnaC07g30740D	0	0	0	0	0	2.77607
BnaC07g35670D	0	0	0	0	0	2.77754
BnaCnng53390D	0	0	0	0	0	2.78091
BnaA01g18050D	0	0	0	0	0	2.78093
BnaA06g23810D	0	0	0	0	0	2.79531
BnaCnng03640D	0	0	0	0	0	2.79538
BnaA04g10460D	0	0	0	0	0	2.80112
BnaC06g09830D	0	0	0	0	0	2.80217
BnaC06g41560D	0	0	0	0	0	2.81543
BnaA06g40760D	0	0	0	0	0	2.82059
BnaC03g43300D	0	0	0	0	0	2.83143
BnaC06g42250D	0	0	0	0	0	2.83244
BnaC06g26450D	0	0	0	0	0	2.8587
BnaC03g53090D	0	0	0	0	0	2.86035
BnaA01g19350D	0	0	0	0	0	2.86138
BnaA06g10760D	0	0	0	0	0	2.86286
BnaC02g21070D	0	0	0	0	0	2.86431
BnaC05g20880D	0	0	0	0	0	2.87264
BnaA03g15020D	0	0	0	0	0	2.87281
BnaA03g13650D	0	0	0	0	0	2.87295
BnaA02g35710D	0	0	0	0	0	2.87699
BnaC03g20240D	0	0	0	0	0	2.87819
BnaCnng47320D	0	0	0	0	0	2.9059
BnaCnng45350D	0	0	0	0	0	2.90644
BnaC09g12360D	0	0	0	0	0	2.9124
BnaA09g23770D	0	0	0	0	0	2.91717
BnaA06g12450D	0	0	0	0	0	2.91727
BnaC06g30120D	0	0	0	0	0	2.92565
BnaC09g42730D	0	0	0	0	0	2.93736
BnaA06g27460D	0	0	0	0	0	2.93824
BnaC09g18260D	0	0	0	0	0	2.94332
BnaA07g13160D	0	0	0	0	0	2.95239
BnaA10g27610D	0	0	0	0	0	2.9668
BnaA05g34930D	0	0	0	0	0	2.96692
BnaC03g67380D	0	0	0	0	0	2.98231
BnaA08g02780D	0	0	0	0	0	2.99443
BnaAnng12900D	0	0	0	0	0	3.00551
BnaC04g28680D	0	0	0	0	0	3.01194
BnaA03g34740D	0	0	0	0	0	3.02161
BnaA09g45510D	0	0	0	0	0	3.04399
BnaCnng17350D	0	0	0	0	0	3.06778
BnaAnng09680D	0	0	0	0	0	3.08497
BnaA06g18900D	0	0	0	0	0	3.08966
BnaC06g24090D	0	0	0	0	0	3.11707
BnaC02g23840D	0	0	0	0	0	3.12424
BnaA03g06440D	0	0	0	0	0	3.12706
BnaC03g66890D	0	0	0	0	0	3.12896
BnaC03g06020D	0	0	0	0	0	3.14717
BnaCnng23550D	0	0	0	0	0	3.17194
BnaC07g01900D	0	0	0	0	0	3.19009
BnaCnng48520D	0	0	0	0	0	3.19081
BnaCnng12780D	0	0	0	0	0	3.19086
BnaAnng05710D	0	0	0	0	0	3.19227
BnaA09g33470D	0	0	0	0	0	3.19884
BnaA02g05700D	0	0	0	0	0	3.21901
BnaCnng12510D	0	0	0	0	0	3.21905
BnaC07g17600D	0	0	0	0	0	3.22421
BnaC05g25320D	0	0	0	0	0	3.25014
BnaC06g31870D	0	0	0	0	0	3.25068
BnaC08g17710D	0	0	0	0	0	3.25632
BnaA03g31030D	0	0	0	0	0	3.26304
BnaC01g22900D	0	0	0	0	0	3.27636
BnaA06g29680D	0	0	0	0	0	3.2764
BnaA06g13700D	0	0	0	0	0	3.28018
BnaCnng23250D	0	0	0	0	0	3.29638
BnaC04g04210D	0	0	0	0	0	3.30386
BnaCnng52180D	0	0	0	0	0	3.31119
BnaA04g02380D	0	0	0	0	0	3.31743
BnaA07g28440D	0	0	0	0	0	3.32283
BnaC01g36330D	0	0	0	0	0	3.32758
BnaA09g11970D	0	0	0	0	0	3.34035
BnaC05g09770D	0	0	0	0	0	3.34114
BnaA07g28820D	0	0	0	0	0	3.3433
BnaA10g19040D	0	0	0	0	0	3.34448
BnaA07g25640D	0	0	0	0	0	3.35694
BnaAnng32670D	0	0	0	0	0	3.37173
BnaC05g14980D	0	0	0	0	0	3.37325
BnaC03g32580D	0	0	0	0	0	3.37619
BnaA02g19720D	0	0	0	0	0	3.3803
BnaC02g10050D	0	0	0	0	0	3.3891
BnaA01g03620D	0	0	0	0	0	3.39645
BnaA07g23430D	0	0	0	0	0	3.39967
BnaC01g39520D	0	0	0	0	0	3.40666
BnaC04g45500D	0	0	0	0	0	3.42423
BnaA08g13860D	0	0	0	0	0	3.44279
BnaC05g50940D	0	0	0	0	0	3.45052
BnaA09g17060D	0	0	0	0	0	3.48538
BnaA08g14900D	0	0	0	0	0	3.48755
BnaC07g41280D	0	0	0	0	0	3.54347
BnaAnng26570D	0	0	0	0	0	3.59303
BnaCnng53700D	0	0	0	0	0	3.65396
BnaA08g11370D	0	0	0	0	0	3.66729
BnaC05g02810D	0	0	0	0	0	1.25251
BnaA06g35630D	0	0	0	0	0	1.25305
BnaA02g36490D	0	0	0	0	0	1.25341
BnaC05g00460D	0	0	0	0	0	1.25431
BnaA01g03200D	0	0	0	0	0	1.25531
BnaC03g52250D	0	0	0	0	0	1.25574
BnaA01g20450D	0	0	0	0	0	1.25587
BnaC08g34170D	0	0	0	0	0	1.25653
BnaA06g03070D	0	0	0	0	0	1.25698
BnaA08g22060D	0	0	0	0	0	1.25728
BnaA09g48250D	0	0	0	0	0	1.25767
BnaAnng22500D	0	0	0	0	0	1.25789
BnaC09g50570D	0	0	0	0	0	1.25926
BnaC01g32640D	0	0	0	0	0	1.26039
BnaC07g27870D	0	0	0	0	0	1.26042
BnaA06g39430D	0	0	0	0	0	1.26072
BnaC01g07700D	0	0	0	0	0	1.26101
BnaC08g25640D	0	0	0	0	0	1.26105
BnaC07g50110D	0	0	0	0	0	1.26194
BnaC01g06320D	0	0	0	0	0	1.26199
BnaA08g14670D	0	0	0	0	0	1.26216
BnaC07g03480D	0	0	0	0	0	1.26315
BnaC05g51160D	0	0	0	0	0	1.26345
BnaC09g34020D	0	0	0	0	0	1.2637
BnaA09g34280D	0	0	0	0	0	1.26428
BnaC03g76260D	0	0	0	0	0	1.26428
BnaC01g12590D	0	0	0	0	0	1.26451
BnaC02g27560D	0	0	0	0	0	1.26503
BnaA01g06150D	0	0	0	0	0	1.26547
BnaC05g06780D	0	0	0	0	0	1.26643
BnaA01g14270D	0	0	0	0	0	1.26656
BnaAnng17350D	0	0	0	0	0	1.26683
BnaC04g02360D	0	0	0	0	0	1.26685
BnaA07g32020D	0	0	0	0	0	1.26742
BnaC05g33790D	0	0	0	0	0	1.26756
BnaC04g06760D	0	0	0	0	0	1.2684
BnaA01g03050D	0	0	0	0	0	1.26936
BnaA10g15220D	0	0	0	0	0	1.27007
BnaA03g42110D	0	0	0	0	0	1.27244
BnaC09g05340D	0	0	0	0	0	1.27384
BnaA08g23110D	0	0	0	0	0	1.27526
BnaA01g00730D	0	0	0	0	0	1.27557
BnaAnng12480D	0	0	0	0	0	1.27574
BnaC03g36350D	0	0	0	0	0	1.27691
BnaC05g18130D	0	0	0	0	0	1.27691
BnaC01g19020D	0	0	0	0	0	1.27704
BnaA06g25920D	0	0	0	0	0	1.27803
BnaA03g57170D	0	0	0	0	0	1.27832
BnaA02g19290D	0	0	0	0	0	1.28032
BnaAnng15100D	0	0	0	0	0	1.28218
BnaC03g28080D	0	0	0	0	0	1.28235
BnaA04g13390D	0	0	0	0	0	1.28292
BnaA05g33520D	0	0	0	0	0	1.28352
BnaC04g11790D	0	0	0	0	0	1.28362
BnaA03g50840D	0	0	0	0	0	1.28437
BnaA09g25400D	0	0	0	0	0	1.28485
BnaC03g13760D	0	0	0	0	0	1.2853
BnaC01g28530D	0	0	0	0	0	1.28608
BnaCnng49870D	0	0	0	0	0	1.2871
BnaA08g28750D	0	0	0	0	0	1.2872
BnaC07g24460D	0	0	0	0	0	1.28763
BnaC03g28800D	0	0	0	0	0	1.28779
BnaA10g00170D	0	0	0	0	0	1.28792
BnaA01g01360D	0	0	0	0	0	1.28809
BnaC04g31360D	0	0	0	0	0	1.28903
BnaC03g36700D	0	0	0	0	0	1.2902
BnaC01g21340D	0	0	0	0	0	1.2918
BnaA03g32080D	0	0	0	0	0	1.29199
BnaA09g42590D	0	0	0	0	0	1.29199
BnaC09g44540D	0	0	0	0	0	1.2924
BnaCnng58510D	0	0	0	0	0	1.29384
BnaA02g05290D	0	0	0	0	0	1.29418
BnaA09g01250D	0	0	0	0	0	1.29432
BnaC05g44540D	0	0	0	0	0	1.29517
BnaCnng30840D	0	0	0	0	0	1.2952
BnaA01g09940D	0	0	0	0	0	1.29615
BnaC09g07340D	0	0	0	0	0	1.29757
BnaC05g00240D	0	0	0	0	0	1.29776
BnaA01g08680D	0	0	0	0	0	1.29896
BnaC04g15750D	0	0	0	0	0	1.2995
BnaC09g48560D	0	0	0	0	0	1.29991
BnaC06g19600D	0	0	0	0	0	1.3
BnaA02g24990D	0	0	0	0	0	1.3001
BnaC09g38410D	0	0	0	0	0	1.30017
BnaA03g20780D	0	0	0	0	0	1.30161
BnaA04g19880D	0	0	0	0	0	1.30235
BnaC05g00420D	0	0	0	0	0	1.30352
BnaA03g38050D	0	0	0	0	0	1.30358
BnaC02g21670D	0	0	0	0	0	1.30425
BnaA03g03110D	0	0	0	0	0	1.30682
BnaA03g42330D	0	0	0	0	0	1.30705
BnaA09g15320D	0	0	0	0	0	1.30829
BnaA06g15400D	0	0	0	0	0	1.30905
BnaC04g29410D	0	0	0	0	0	1.30964
BnaA09g26270D	0	0	0	0	0	1.3102
BnaCnng11120D	0	0	0	0	0	1.31034
BnaC02g45740D	0	0	0	0	0	1.31043
BnaA03g35980D	0	0	0	0	0	1.31052
BnaC09g18810D	0	0	0	0	0	1.31056
BnaC06g25830D	0	0	0	0	0	1.31071
BnaA08g02470D	0	0	0	0	0	1.31112
BnaA05g22990D	0	0	0	0	0	1.31275
BnaA04g00440D	0	0	0	0	0	1.3135
BnaC09g51740D	0	0	0	0	0	1.3137
BnaA06g17170D	0	0	0	0	0	1.31654
BnaC03g71890D	0	0	0	0	0	1.31735
BnaC01g04390D	0	0	0	0	0	1.31742
BnaAnng07030D	0	0	0	0	0	1.31814
BnaC03g70460D	0	0	0	0	0	1.31827
BnaC05g41950D	0	0	0	0	0	1.31828
BnaC04g38520D	0	0	0	0	0	1.31844
BnaC03g31970D	0	0	0	0	0	1.31892
BnaC09g48570D	0	0	0	0	0	1.31945
BnaA05g01650D	0	0	0	0	0	1.32008
BnaC08g06550D	0	0	0	0	0	1.32129
BnaC04g50930D	0	0	0	0	0	1.32183
BnaC03g14720D	0	0	0	0	0	1.32381
BnaC05g21240D	0	0	0	0	0	1.32382
BnaC01g09820D	0	0	0	0	0	1.32441
BnaC09g02930D	0	0	0	0	0	1.32566
BnaA01g01340D	0	0	0	0	0	1.32617
BnaAnng21710D	0	0	0	0	0	1.32685
BnaA05g07300D	0	0	0	0	0	1.32766
BnaC07g38780D	0	0	0	0	0	1.32865
BnaA06g00400D	0	0	0	0	0	1.32971
BnaC05g05570D	0	0	0	0	0	1.33091
BnaA03g05930D	0	0	0	0	0	1.3315
BnaC05g11520D	0	0	0	0	0	1.33167
BnaC04g52100D	0	0	0	0	0	1.33295
BnaA05g04540D	0	0	0	0	0	1.33296
BnaC08g11140D	0	0	0	0	0	1.33403
BnaA04g09420D	0	0	0	0	0	1.3341
BnaC09g47040D	0	0	0	0	0	1.33431
BnaA06g37970D	0	0	0	0	0	1.33485
BnaA07g04370D	0	0	0	0	0	1.33491
BnaC08g43760D	0	0	0	0	0	1.33637
BnaAnng25360D	0	0	0	0	0	1.33648
BnaA01g07330D	0	0	0	0	0	1.33677
BnaC09g38440D	0	0	0	0	0	1.33711
BnaC04g01060D	0	0	0	0	0	1.33715
BnaC05g12920D	0	0	0	0	0	1.33735
BnaCnng57490D	0	0	0	0	0	1.33785
BnaC06g17360D	0	0	0	0	0	1.33941
BnaA09g35590D	0	0	0	0	0	1.34007
BnaC04g49800D	0	0	0	0	0	1.3408
BnaA01g01910D	0	0	0	0	0	1.34096
BnaA02g19860D	0	0	0	0	0	1.34138
BnaC03g07000D	0	0	0	0	0	1.34174
BnaA02g13100D	0	0	0	0	0	1.34281
BnaA09g54780D	0	0	0	0	0	1.3429
BnaA07g37590D	0	0	0	0	0	1.34311
BnaA07g03740D	0	0	0	0	0	1.34342
BnaA07g32210D	0	0	0	0	0	1.34345
BnaC07g15950D	0	0	0	0	0	1.34535
BnaC03g21930D	0	0	0	0	0	1.34557
BnaC04g00430D	0	0	0	0	0	1.34609
BnaC05g48120D	0	0	0	0	0	1.34798
BnaA06g22800D	0	0	0	0	0	1.34849
BnaC09g09070D	0	0	0	0	0	1.34983
BnaA09g01310D	0	0	0	0	0	1.35056
BnaA03g20210D	0	0	0	0	0	1.35158
BnaA03g51900D	0	0	0	0	0	1.3517
BnaC02g41040D	0	0	0	0	0	1.35191
BnaA08g28350D	0	0	0	0	0	1.3526
BnaCnng06060D	0	0	0	0	0	1.35275
BnaC04g08100D	0	0	0	0	0	1.35276
BnaC06g05350D	0	0	0	0	0	1.35322
BnaC05g33690D	0	0	0	0	0	1.3533
BnaA09g27350D	0	0	0	0	0	1.35487
BnaC07g22100D	0	0	0	0	0	1.35612
BnaC05g44140D	0	0	0	0	0	1.35682
BnaA06g35560D	0	0	0	0	0	1.35862
BnaC06g39200D	0	0	0	0	0	1.3611
BnaC05g00450D	0	0	0	0	0	1.36133
BnaA02g19410D	0	0	0	0	0	1.3626
BnaA01g09480D	0	0	0	0	0	1.3628
BnaC08g27590D	0	0	0	0	0	1.36456
BnaC02g01070D	0	0	0	0	0	1.36487
BnaA03g56650D	0	0	0	0	0	1.36505
BnaC06g27650D	0	0	0	0	0	1.36591
BnaC02g43960D	0	0	0	0	0	1.3664
BnaC05g49490D	0	0	0	0	0	1.36743
BnaA04g29490D	0	0	0	0	0	1.36767
BnaA08g20730D	0	0	0	0	0	1.36843
BnaC01g38510D	0	0	0	0	0	1.3688
BnaC04g42550D	0	0	0	0	0	1.36898
BnaC07g38560D	0	0	0	0	0	1.37093
BnaC06g01160D	0	0	0	0	0	1.37105
BnaA01g35710D	0	0	0	0	0	1.37248
BnaC04g52580D	0	0	0	0	0	1.37359
BnaA09g49660D	0	0	0	0	0	1.37415
BnaC01g43040D	0	0	0	0	0	1.37417
BnaC04g10990D	0	0	0	0	0	1.37417
BnaC01g33110D	0	0	0	0	0	1.37769
BnaC04g14080D	0	0	0	0	0	1.38056
BnaC02g07050D	0	0	0	0	0	1.38058
BnaA09g51190D	0	0	0	0	0	1.3809
BnaC02g40790D	0	0	0	0	0	1.38334
BnaA09g31620D	0	0	0	0	0	1.38429
BnaC04g45430D	0	0	0	0	0	1.38459
BnaA01g17560D	0	0	0	0	0	1.38552
BnaC04g36140D	0	0	0	0	0	1.38652
BnaC04g24980D	0	0	0	0	0	1.38835
BnaC03g29100D	0	0	0	0	0	1.38878
BnaA08g04360D	0	0	0	0	0	1.3892
BnaC08g32010D	0	0	0	0	0	1.38969
BnaA07g21530D	0	0	0	0	0	1.39017
BnaC06g42780D	0	0	0	0	0	1.39284
BnaA10g22750D	0	0	0	0	0	1.39339
BnaC07g22990D	0	0	0	0	0	1.39351
BnaC09g31380D	0	0	0	0	0	1.3938
BnaA03g31960D	0	0	0	0	0	1.39546
BnaA03g30060D	0	0	0	0	0	1.39594
BnaCnng06680D	0	0	0	0	0	1.39643
BnaA05g27460D	0	0	0	0	0	1.39688
BnaC06g26320D	0	0	0	0	0	1.39769
BnaA08g18750D	0	0	0	0	0	1.39773
BnaA10g29520D	0	0	0	0	0	1.39843
BnaC04g07090D	0	0	0	0	0	1.39944
BnaC05g02100D	0	0	0	0	0	1.39945
BnaC04g02990D	0	0	0	0	0	1.3996
BnaC07g31080D	0	0	0	0	0	1.40143
BnaC04g36570D	0	0	0	0	0	1.40207
BnaC09g38370D	0	0	0	0	0	1.4023
BnaC01g26640D	0	0	0	0	0	1.40234
BnaC05g07350D	0	0	0	0	0	1.40374
BnaA09g12290D	0	0	0	0	0	1.40521
BnaA09g45580D	0	0	0	0	0	1.40691
BnaC06g36810D	0	0	0	0	0	1.40706
BnaC08g17560D	0	0	0	0	0	1.40783
BnaA09g39240D	0	0	0	0	0	1.40878
BnaC02g05800D	0	0	0	0	0	1.40895
BnaA02g18470D	0	0	0	0	0	1.40913
BnaCnng05580D	0	0	0	0	0	1.40947
BnaA08g01170D	0	0	0	0	0	1.41001
BnaC07g17390D	0	0	0	0	0	1.41024
BnaA06g01060D	0	0	0	0	0	1.41026
BnaC09g47970D	0	0	0	0	0	1.41039
BnaA03g19140D	0	0	0	0	0	1.41195
BnaC07g08240D	0	0	0	0	0	1.41238
BnaC03g38870D	0	0	0	0	0	1.41323
BnaCnng19430D	0	0	0	0	0	1.41333
BnaC08g26820D	0	0	0	0	0	1.41359
BnaC05g47780D	0	0	0	0	0	1.41377
BnaA06g12810D	0	0	0	0	0	1.41384
BnaCnng04240D	0	0	0	0	0	1.4151
BnaA09g39530D	0	0	0	0	0	1.41519
BnaC03g50700D	0	0	0	0	0	1.41583
BnaA08g22920D	0	0	0	0	0	1.41612
BnaC05g05330D	0	0	0	0	0	1.41764
BnaA04g22550D	0	0	0	0	0	1.41876
BnaC05g51350D	0	0	0	0	0	1.41921
BnaAnng07530D	0	0	0	0	0	1.41952
BnaC04g02450D	0	0	0	0	0	1.41979
BnaA09g15970D	0	0	0	0	0	1.42349
BnaA09g34120D	0	0	0	0	0	1.42396
BnaA10g20190D	0	0	0	0	0	1.42408
BnaA09g03960D	0	0	0	0	0	1.42447
BnaA06g13080D	0	0	0	0	0	1.42565
BnaC09g48580D	0	0	0	0	0	1.42573
BnaC07g11630D	0	0	0	0	0	1.42592
BnaA01g05960D	0	0	0	0	0	1.42672
BnaC09g46870D	0	0	0	0	0	1.42798
BnaA01g15130D	0	0	0	0	0	1.42826
BnaC09g11190D	0	0	0	0	0	1.4286
BnaC04g11110D	0	0	0	0	0	1.43124
BnaA09g56490D	0	0	0	0	0	1.43149
BnaCnng06580D	0	0	0	0	0	1.43299
BnaC04g39630D	0	0	0	0	0	1.43326
BnaC07g43650D	0	0	0	0	0	1.43346
BnaA01g36950D	0	0	0	0	0	1.43517
BnaA05g02180D	0	0	0	0	0	1.43561
BnaC04g05050D	0	0	0	0	0	1.43674
BnaCnng29270D	0	0	0	0	0	1.43713
BnaC01g03050D	0	0	0	0	0	1.43741
BnaC08g37500D	0	0	0	0	0	1.43767
BnaC01g38380D	0	0	0	0	0	1.43909
BnaC06g05840D	0	0	0	0	0	1.44029
BnaC03g31140D	0	0	0	0	0	1.44055
BnaA05g21020D	0	0	0	0	0	1.4409
BnaA03g41040D	0	0	0	0	0	1.44171
BnaC01g16120D	0	0	0	0	0	1.44306
BnaC04g50310D	0	0	0	0	0	1.44312
BnaC07g46250D	0	0	0	0	0	1.44416
BnaC01g04620D	0	0	0	0	0	1.44438
BnaC04g52230D	0	0	0	0	0	1.44669
BnaA02g10970D	0	0	0	0	0	1.44772
BnaA05g06880D	0	0	0	0	0	1.44859
BnaC05g03020D	0	0	0	0	0	1.44873
BnaC07g32860D	0	0	0	0	0	1.44921
BnaC01g12800D	0	0	0	0	0	1.44962
BnaC02g12950D	0	0	0	0	0	1.45522
BnaA06g14220D	0	0	0	0	0	1.45557
BnaC07g06580D	0	0	0	0	0	1.45595
BnaC05g44610D	0	0	0	0	0	1.45607
BnaC06g36580D	0	0	0	0	0	1.45779
BnaA01g02530D	0	0	0	0	0	1.45994
BnaC05g03010D	0	0	0	0	0	1.46016
BnaC07g19470D	0	0	0	0	0	1.4623
BnaC07g13840D	0	0	0	0	0	1.46263
BnaCnng36160D	0	0	0	0	0	1.46284
BnaA06g32440D	0	0	0	0	0	1.46388
BnaA01g14080D	0	0	0	0	0	1.46526
BnaA02g35050D	0	0	0	0	0	1.4661
BnaA05g24930D	0	0	0	0	0	1.46641
BnaC03g67710D	0	0	0	0	0	1.47029
BnaA10g11080D	0	0	0	0	0	1.47145
BnaC08g37780D	0	0	0	0	0	1.47235
BnaC02g37590D	0	0	0	0	0	1.47242
BnaA09g48160D	0	0	0	0	0	1.47318
BnaA05g22400D	0	0	0	0	0	1.47322
BnaAnng25490D	0	0	0	0	0	1.47336
BnaC03g09860D	0	0	0	0	0	1.47377
BnaA03g13550D	0	0	0	0	0	1.47424
BnaA10g10190D	0	0	0	0	0	1.47441
BnaAnng41650D	0	0	0	0	0	1.47521
BnaC09g49610D	0	0	0	0	0	1.47528
BnaA06g07220D	0	0	0	0	0	1.47554
BnaC02g37740D	0	0	0	0	0	1.47626
BnaA04g29680D	0	0	0	0	0	1.47814
BnaA08g28190D	0	0	0	0	0	1.479
BnaC06g22310D	0	0	0	0	0	1.48486
BnaCnng58360D	0	0	0	0	0	1.48515
BnaCnng52390D	0	0	0	0	0	1.4881
BnaC03g50820D	0	0	0	0	0	1.48866
BnaA08g27280D	0	0	0	0	0	1.48873
BnaA08g06260D	0	0	0	0	0	1.4896
BnaC06g22050D	0	0	0	0	0	1.49433
BnaA03g45700D	0	0	0	0	0	1.49448
BnaA01g30490D	0	0	0	0	0	1.4945
BnaA09g45520D	0	0	0	0	0	1.49583
BnaA03g24240D	0	0	0	0	0	1.49618
BnaA05g12100D	0	0	0	0	0	1.497
BnaC09g53480D	0	0	0	0	0	1.4975
BnaA10g28610D	0	0	0	0	0	1.49804
BnaCnng19200D	0	0	0	0	0	1.49886
BnaC03g43680D	0	0	0	0	0	1.49983
BnaC04g54510D	0	0	0	0	0	1.50164
BnaC05g31560D	0	0	0	0	0	1.50384
BnaA09g30490D	0	0	0	0	0	1.50406
BnaC04g21990D	0	0	0	0	0	1.50462
BnaC01g00540D	0	0	0	0	0	1.50597
BnaA05g35030D	0	0	0	0	0	1.50751
BnaC06g30040D	0	0	0	0	0	1.51037
BnaC04g05740D	0	0	0	0	0	1.5111
BnaCnng01360D	0	0	0	0	0	1.51317
BnaA10g18410D	0	0	0	0	0	1.51469
BnaA02g33520D	0	0	0	0	0	1.51598
BnaAnng15990D	0	0	0	0	0	1.51638
BnaA06g19660D	0	0	0	0	0	1.52018
BnaC05g31250D	0	0	0	0	0	1.52162
BnaA06g27590D	0	0	0	0	0	1.52276
BnaA05g30860D	0	0	0	0	0	1.52396
BnaA09g54290D	0	0	0	0	0	1.52501
BnaA02g06460D	0	0	0	0	0	1.52512
BnaAnng13520D	0	0	0	0	0	1.52549
BnaC01g02130D	0	0	0	0	0	1.52574
BnaA07g38610D	0	0	0	0	0	1.5272
BnaC01g04180D	0	0	0	0	0	1.52739
BnaCnng73250D	0	0	0	0	0	1.52783
BnaC03g25530D	0	0	0	0	0	1.5283
BnaC09g25140D	0	0	0	0	0	1.52931
BnaC09g22400D	0	0	0	0	0	1.53029
BnaC08g35970D	0	0	0	0	0	1.53123
BnaA01g35420D	0	0	0	0	0	1.53263
BnaA10g17890D	0	0	0	0	0	1.53293
BnaA06g15610D	0	0	0	0	0	1.53386
BnaA06g09170D	0	0	0	0	0	1.53502
BnaA09g28000D	0	0	0	0	0	1.53661
BnaC09g41010D	0	0	0	0	0	1.53872
BnaA07g05850D	0	0	0	0	0	1.53966
BnaC07g21770D	0	0	0	0	0	1.54178
BnaC02g04420D	0	0	0	0	0	1.5419
BnaA06g06150D	0	0	0	0	0	1.54381
BnaA03g17520D	0	0	0	0	0	1.54383
BnaC03g14710D	0	0	0	0	0	1.54641
BnaCnng33370D	0	0	0	0	0	1.5515
BnaA01g21510D	0	0	0	0	0	1.55198
BnaC01g30100D	0	0	0	0	0	1.55225
BnaC07g04210D	0	0	0	0	0	1.55369
BnaA05g25570D	0	0	0	0	0	1.55444
BnaC06g05650D	0	0	0	0	0	1.55633
BnaC05g09390D	0	0	0	0	0	1.55653
BnaC05g03430D	0	0	0	0	0	1.55829
BnaAnng03740D	0	0	0	0	0	1.55865
BnaC05g46550D	0	0	0	0	0	1.55934
BnaC07g26120D	0	0	0	0	0	1.5603
BnaA03g50240D	0	0	0	0	0	1.56095
BnaA01g18740D	0	0	0	0	0	1.56102
BnaA04g15520D	0	0	0	0	0	1.56145
BnaA09g00480D	0	0	0	0	0	1.5621
BnaC02g43080D	0	0	0	0	0	1.56436
BnaC03g00120D	0	0	0	0	0	1.56472
BnaA07g29460D	0	0	0	0	0	1.56487
BnaC09g02380D	0	0	0	0	0	1.56606
BnaCnng18810D	0	0	0	0	0	1.56625
BnaC04g10730D	0	0	0	0	0	1.569
BnaA05g26120D	0	0	0	0	0	1.56947
BnaC03g36390D	0	0	0	0	0	1.56998
BnaA09g56660D	0	0	0	0	0	1.57111
BnaCnng23020D	0	0	0	0	0	1.57128
BnaCnng49530D	0	0	0	0	0	1.57141
BnaC01g08040D	0	0	0	0	0	1.57146
BnaAnng16720D	0	0	0	0	0	1.57189
BnaA08g12600D	0	0	0	0	0	1.57233
BnaC07g35500D	0	0	0	0	0	1.57301
BnaA05g33510D	0	0	0	0	0	1.57356
BnaA03g03680D	0	0	0	0	0	1.5757
BnaA04g29560D	0	0	0	0	0	1.57599
BnaAnng13240D	0	0	0	0	0	1.57637
BnaA07g35640D	0	0	0	0	0	1.57759
BnaAnng42010D	0	0	0	0	0	1.57963
BnaA05g10200D	0	0	0	0	0	1.58012
BnaA03g07830D	0	0	0	0	0	1.58066
BnaA05g25380D	0	0	0	0	0	1.58211
BnaC03g57180D	0	0	0	0	0	1.58237
BnaA09g51970D	0	0	0	0	0	1.58281
BnaA07g22900D	0	0	0	0	0	1.58304
BnaA03g15610D	0	0	0	0	0	1.58559
BnaA03g57630D	0	0	0	0	0	1.58864
BnaC03g21580D	0	0	0	0	0	1.58894
BnaC02g00470D	0	0	0	0	0	1.5894
BnaA07g18050D	0	0	0	0	0	1.58961
BnaA08g17820D	0	0	0	0	0	1.59057
BnaA10g17050D	0	0	0	0	0	1.59402
BnaA09g18190D	0	0	0	0	0	1.59473
BnaC01g36080D	0	0	0	0	0	1.59586
BnaC09g15940D	0	0	0	0	0	1.59602
BnaA06g32060D	0	0	0	0	0	1.59793
BnaCnng49470D	0	0	0	0	0	1.59893
BnaC04g40450D	0	0	0	0	0	1.60072
BnaA08g05730D	0	0	0	0	0	1.60143
BnaA06g24870D	0	0	0	0	0	1.60274
BnaC04g23510D	0	0	0	0	0	1.60608
BnaA10g15800D	0	0	0	0	0	1.60624
BnaCnng52400D	0	0	0	0	0	1.60629
BnaC08g38360D	0	0	0	0	0	1.60718
BnaA07g20320D	0	0	0	0	0	1.60822
BnaCnng25880D	0	0	0	0	0	1.60837
BnaC03g57570D	0	0	0	0	0	1.60912
BnaAnng26590D	0	0	0	0	0	1.60947
BnaC09g26860D	0	0	0	0	0	1.61233
BnaA04g17470D	0	0	0	0	0	1.61427
BnaC03g59270D	0	0	0	0	0	1.6146
BnaA09g08790D	0	0	0	0	0	1.61491
BnaC07g29460D	0	0	0	0	0	1.6164
BnaA01g06140D	0	0	0	0	0	1.61692
BnaC02g15270D	0	0	0	0	0	1.61916
BnaA04g21260D	0	0	0	0	0	1.6196
BnaA07g35030D	0	0	0	0	0	1.62031
BnaC01g17890D	0	0	0	0	0	1.62072
BnaA03g35880D	0	0	0	0	0	1.62144
BnaC09g32680D	0	0	0	0	0	1.62299
BnaC06g21190D	0	0	0	0	0	1.62344
BnaCnng42990D	0	0	0	0	0	1.62383
BnaA07g13930D	0	0	0	0	0	1.62389
BnaCnng71390D	0	0	0	0	0	1.62473
BnaA10g20530D	0	0	0	0	0	1.62525
BnaC02g42680D	0	0	0	0	0	1.62577
BnaC08g17230D	0	0	0	0	0	1.62707
BnaC02g39460D	0	0	0	0	0	1.63132
BnaC05g16140D	0	0	0	0	0	1.63608
BnaA09g46610D	0	0	0	0	0	1.637
BnaA07g10590D	0	0	0	0	0	1.63879
BnaC08g19320D	0	0	0	0	0	1.63889
BnaA08g00740D	0	0	0	0	0	1.6392
BnaA09g00130D	0	0	0	0	0	1.64053
BnaC08g18860D	0	0	0	0	0	1.64216
BnaA06g14360D	0	0	0	0	0	1.64226
BnaA06g24170D	0	0	0	0	0	1.64241
BnaA01g33290D	0	0	0	0	0	1.64315
BnaA06g16950D	0	0	0	0	0	1.64332
BnaC03g73080D	0	0	0	0	0	1.64609
BnaC08g07230D	0	0	0	0	0	1.64766
BnaA05g23020D	0	0	0	0	0	1.6482
BnaC09g29290D	0	0	0	0	0	1.65149
BnaA01g19590D	0	0	0	0	0	1.65327
BnaA07g10040D	0	0	0	0	0	1.65332
BnaA03g42280D	0	0	0	0	0	1.65598
BnaA01g06700D	0	0	0	0	0	1.65818
BnaA09g27680D	0	0	0	0	0	1.65832
BnaC08g05600D	0	0	0	0	0	1.65897
BnaC05g36380D	0	0	0	0	0	1.66004
BnaA08g00140D	0	0	0	0	0	1.6603
BnaA07g33420D	0	0	0	0	0	1.66266
BnaC01g19960D	0	0	0	0	0	1.66331
BnaA03g05110D	0	0	0	0	0	1.66333
BnaA01g17140D	0	0	0	0	0	1.66406
BnaC06g24700D	0	0	0	0	0	1.66624
BnaAnng30990D	0	0	0	0	0	1.66632
BnaA06g06810D	0	0	0	0	0	1.66654
BnaA08g21750D	0	0	0	0	0	1.66702
BnaA07g02870D	0	0	0	0	0	1.66775
BnaA10g01930D	0	0	0	0	0	1.66996
BnaCnng25280D	0	0	0	0	0	1.67296
BnaC08g12300D	0	0	0	0	0	1.67348
BnaCnng09020D	0	0	0	0	0	1.67507
BnaA09g26420D	0	0	0	0	0	1.67529
BnaAnng07130D	0	0	0	0	0	1.67831
BnaC06g32630D	0	0	0	0	0	1.67985
BnaC08g01760D	0	0	0	0	0	1.68238
BnaA07g19820D	0	0	0	0	0	1.68386
BnaC06g21250D	0	0	0	0	0	1.68481
BnaA08g06540D	0	0	0	0	0	1.68524
BnaA03g08320D	0	0	0	0	0	1.68804
BnaA05g35680D	0	0	0	0	0	1.68903
BnaC07g16550D	0	0	0	0	0	1.69112
BnaCnng21490D	0	0	0	0	0	1.6922
BnaC05g05190D	0	0	0	0	0	1.6961
BnaA02g34200D	0	0	0	0	0	1.69675
BnaA02g13340D	0	0	0	0	0	1.69802
BnaC03g25540D	0	0	0	0	0	1.70029
BnaC03g31070D	0	0	0	0	0	1.70036
BnaC09g08090D	0	0	0	0	0	1.70215
BnaC09g20030D	0	0	0	0	0	1.70335
BnaA08g13840D	0	0	0	0	0	1.70415
BnaC09g43060D	0	0	0	0	0	1.70629
BnaC05g04350D	0	0	0	0	0	1.70685
BnaA07g08530D	0	0	0	0	0	1.70735
BnaA03g57640D	0	0	0	0	0	1.70817
BnaA05g13790D	0	0	0	0	0	1.70939
BnaC03g12510D	0	0	0	0	0	1.71335
BnaA09g40490D	0	0	0	0	0	1.71349
BnaA07g35370D	0	0	0	0	0	1.71633
BnaC05g09400D	0	0	0	0	0	1.71752
BnaC02g47540D	0	0	0	0	0	1.71813
BnaC04g09650D	0	0	0	0	0	1.72153
BnaC03g06640D	0	0	0	0	0	1.72158
BnaA09g27660D	0	0	0	0	0	1.7218
BnaA03g12630D	0	0	0	0	0	1.72283
BnaA06g31950D	0	0	0	0	0	1.72309
BnaA06g10590D	0	0	0	0	0	1.72386
BnaA10g21890D	0	0	0	0	0	1.72701
BnaA03g37780D	0	0	0	0	0	1.7282
BnaC03g71050D	0	0	0	0	0	1.72954
BnaC02g41120D	0	0	0	0	0	1.7316
BnaA08g18340D	0	0	0	0	0	1.73254
BnaC07g10150D	0	0	0	0	0	1.7339
BnaC03g34540D	0	0	0	0	0	1.7345
BnaC08g19040D	0	0	0	0	0	1.73465
BnaCnng59650D	0	0	0	0	0	1.73859
BnaC07g44600D	0	0	0	0	0	1.74408
BnaA06g04070D	0	0	0	0	0	1.74505
BnaA06g34350D	0	0	0	0	0	1.74558
BnaA06g32320D	0	0	0	0	0	1.74612
BnaA07g29550D	0	0	0	0	0	1.74999
BnaA07g34660D	0	0	0	0	0	1.75096
BnaA03g43870D	0	0	0	0	0	1.75524
BnaC09g34350D	0	0	0	0	0	1.7613
BnaA03g39970D	0	0	0	0	0	1.76177
BnaA06g36080D	0	0	0	0	0	1.76293
BnaA03g41560D	0	0	0	0	0	1.76329
BnaA08g04620D	0	0	0	0	0	1.7639
BnaA06g39100D	0	0	0	0	0	1.76402
BnaA08g09330D	0	0	0	0	0	1.76519
BnaA10g23330D	0	0	0	0	0	1.7654
BnaC07g17300D	0	0	0	0	0	1.76722
BnaC05g19270D	0	0	0	0	0	1.7673
BnaCnng78620D	0	0	0	0	0	1.76869
BnaAnng02190D	0	0	0	0	0	1.76958
BnaC08g21640D	0	0	0	0	0	1.7697
BnaCnng22350D	0	0	0	0	0	1.77262
BnaC08g11400D	0	0	0	0	0	1.77273
BnaC05g37730D	0	0	0	0	0	1.77282
BnaA01g34130D	0	0	0	0	0	1.77471
BnaC05g12590D	0	0	0	0	0	1.77612
BnaC09g35440D	0	0	0	0	0	1.77818
BnaCnng05190D	0	0	0	0	0	1.77946
BnaCnng15830D	0	0	0	0	0	1.78001
BnaA09g10390D	0	0	0	0	0	1.78126
BnaA06g23380D	0	0	0	0	0	1.78331
BnaA06g25970D	0	0	0	0	0	1.78374
BnaA10g10950D	0	0	0	0	0	1.7844
BnaA07g32870D	0	0	0	0	0	1.78445
BnaC03g12390D	0	0	0	0	0	1.78776
BnaA03g13320D	0	0	0	0	0	1.79016
BnaA03g40020D	0	0	0	0	0	1.79232
BnaC05g07890D	0	0	0	0	0	1.7952
BnaC07g24800D	0	0	0	0	0	1.7979
BnaC08g25050D	0	0	0	0	0	1.80169
BnaC01g16760D	0	0	0	0	0	1.80291
BnaC05g14600D	0	0	0	0	0	1.80551
BnaA10g11120D	0	0	0	0	0	1.80784
BnaC09g29420D	0	0	0	0	0	1.81481
BnaCnng39600D	0	0	0	0	0	1.81561
BnaC09g20050D	0	0	0	0	0	1.81819
BnaC03g48750D	0	0	0	0	0	1.81924
BnaA05g29710D	0	0	0	0	0	1.82089
BnaA03g18990D	0	0	0	0	0	1.82136
BnaAnng04970D	0	0	0	0	0	1.82214
BnaA04g27830D	0	0	0	0	0	1.82707
BnaAnng38640D	0	0	0	0	0	1.83151
BnaC07g42720D	0	0	0	0	0	1.83537
BnaA08g16960D	0	0	0	0	0	1.83599
BnaA05g24000D	0	0	0	0	0	1.83652
BnaCnng06700D	0	0	0	0	0	1.84079
BnaA09g02950D	0	0	0	0	0	1.84374
BnaC08g41160D	0	0	0	0	0	1.84779
BnaCnng37450D	0	0	0	0	0	1.84935
BnaC04g45690D	0	0	0	0	0	1.85008
BnaC03g51830D	0	0	0	0	0	1.85369
BnaA10g24440D	0	0	0	0	0	1.85529
BnaC02g00070D	0	0	0	0	0	1.85938
BnaAnng23710D	0	0	0	0	0	1.8613
BnaC03g71690D	0	0	0	0	0	1.86162
BnaCnng64710D	0	0	0	0	0	1.8631
BnaC04g33730D	0	0	0	0	0	1.8639
BnaC09g20850D	0	0	0	0	0	1.86762
BnaA09g35480D	0	0	0	0	0	1.86972
BnaC04g31650D	0	0	0	0	0	1.86993
BnaC05g03580D	0	0	0	0	0	1.87024
BnaA09g32150D	0	0	0	0	0	1.87255
BnaA06g17590D	0	0	0	0	0	1.87369
BnaA04g04400D	0	0	0	0	0	1.87621
BnaAnng37740D	0	0	0	0	0	1.8768
BnaA02g24930D	0	0	0	0	0	1.87715
BnaAnng27610D	0	0	0	0	0	1.87732
BnaA09g56870D	0	0	0	0	0	1.87767
BnaC01g25860D	0	0	0	0	0	1.87908
BnaC03g72010D	0	0	0	0	0	1.87957
BnaC06g13910D	0	0	0	0	0	1.88625
BnaC03g72550D	0	0	0	0	0	1.88708
BnaC08g33100D	0	0	0	0	0	1.89002
BnaA07g01950D	0	0	0	0	0	1.89291
BnaA08g25620D	0	0	0	0	0	1.89398
BnaC07g09690D	0	0	0	0	0	1.8943
BnaA02g16580D	0	0	0	0	0	1.8986
BnaA03g05130D	0	0	0	0	0	1.9011
BnaC04g40990D	0	0	0	0	0	1.90435
BnaC05g07900D	0	0	0	0	0	1.90544
BnaA09g42250D	0	0	0	0	0	1.90896
BnaA06g21110D	0	0	0	0	0	1.91066
BnaA07g21940D	0	0	0	0	0	1.9119
BnaA09g50650D	0	0	0	0	0	1.91225
BnaC09g04040D	0	0	0	0	0	1.9127
BnaA09g55020D	0	0	0	0	0	1.91323
BnaAnng28530D	0	0	0	0	0	1.91995
BnaUnng03250D	0	0	0	0	0	1.00124
BnaC05g13800D	0	0	0	0	0	1.002
BnaAnng36340D	0	0	0	0	0	1.00276
BnaC03g67410D	0	0	0	0	0	1.0028
BnaC08g17160D	0	0	0	0	0	1.00314
BnaA03g28480D	0	0	0	0	0	1.00383
BnaA06g37270D	0	0	0	0	0	1.00441
BnaA07g38760D	0	0	0	0	0	1.00444
BnaAnng31500D	0	0	0	0	0	1.00589
BnaC05g30280D	0	0	0	0	0	1.00609
BnaC08g23330D	0	0	0	0	0	1.00658
BnaC02g42690D	0	0	0	0	0	1.00679
BnaC03g50270D	0	0	0	0	0	1.00714
BnaA07g19020D	0	0	0	0	0	1.00757
BnaA09g34030D	0	0	0	0	0	1.00815
BnaC03g28320D	0	0	0	0	0	1.00901
BnaC06g38580D	0	0	0	0	0	1.01008
BnaC04g25820D	0	0	0	0	0	1.01021
BnaA01g00010D	0	0	0	0	0	1.01076
BnaC03g20950D	0	0	0	0	0	1.01092
BnaAnng21800D	0	0	0	0	0	1.011
BnaC02g33830D	0	0	0	0	0	1.01163
BnaC01g25760D	0	0	0	0	0	1.01197
BnaC05g06710D	0	0	0	0	0	1.01224
BnaC09g49020D	0	0	0	0	0	1.01291
BnaC08g24780D	0	0	0	0	0	1.01427
BnaCnng16760D	0	0	0	0	0	1.01489
BnaA03g30530D	0	0	0	0	0	1.01492
BnaC09g47840D	0	0	0	0	0	1.01528
BnaC08g02410D	0	0	0	0	0	1.01538
BnaC07g03550D	0	0	0	0	0	1.01541
BnaCnng19730D	0	0	0	0	0	1.01591
BnaC05g32790D	0	0	0	0	0	1.01635
BnaC09g02080D	0	0	0	0	0	1.01639
BnaC01g15560D	0	0	0	0	0	1.0167
BnaA03g06250D	0	0	0	0	0	1.01735
BnaA02g33090D	0	0	0	0	0	1.01829
BnaC08g34420D	0	0	0	0	0	1.01867
BnaA10g09470D	0	0	0	0	0	1.01919
BnaA10g23270D	0	0	0	0	0	1.01985
BnaC04g26670D	0	0	0	0	0	1.01995
BnaC03g05780D	0	0	0	0	0	1.02128
BnaC02g12750D	0	0	0	0	0	1.02137
BnaA03g44400D	0	0	0	0	0	1.02314
BnaA07g34370D	0	0	0	0	0	1.02329
BnaA05g19630D	0	0	0	0	0	1.02345
BnaA05g09830D	0	0	0	0	0	1.02418
BnaCnng43180D	0	0	0	0	0	1.02425
BnaC04g54960D	0	0	0	0	0	1.02454
BnaC09g31680D	0	0	0	0	0	1.02521
BnaC03g30720D	0	0	0	0	0	1.0259
BnaC03g39420D	0	0	0	0	0	1.02614
BnaC04g01400D	0	0	0	0	0	1.02615
BnaA03g21800D	0	0	0	0	0	1.02628
BnaA03g16950D	0	0	0	0	0	1.02695
BnaC01g03610D	0	0	0	0	0	1.02739
BnaA02g07500D	0	0	0	0	0	1.02757
BnaC05g49730D	0	0	0	0	0	1.0277
BnaC04g35500D	0	0	0	0	0	1.02811
BnaC09g45200D	0	0	0	0	0	1.02816
BnaA08g24150D	0	0	0	0	0	1.02916
BnaC04g16450D	0	0	0	0	0	1.02964
BnaC07g31950D	0	0	0	0	0	1.02964
BnaCnng12150D	0	0	0	0	0	1.02977
BnaC05g14000D	0	0	0	0	0	1.0298
BnaC06g00540D	0	0	0	0	0	1.02992
BnaA07g38880D	0	0	0	0	0	1.03003
BnaA05g04210D	0	0	0	0	0	1.03044
BnaC09g33030D	0	0	0	0	0	1.03126
BnaA05g25120D	0	0	0	0	0	1.03199
BnaA04g14770D	0	0	0	0	0	1.03259
BnaC08g47980D	0	0	0	0	0	1.03263
BnaA07g35060D	0	0	0	0	0	1.03356
BnaA02g02710D	0	0	0	0	0	1.03688
BnaC05g14920D	0	0	0	0	0	1.03737
BnaCnng17310D	0	0	0	0	0	1.03769
BnaA07g10570D	0	0	0	0	0	1.0377
BnaA06g22770D	0	0	0	0	0	1.03891
BnaA06g14560D	0	0	0	0	0	1.03909
BnaC02g46710D	0	0	0	0	0	1.03929
BnaA02g29490D	0	0	0	0	0	1.04027
BnaCnng63240D	0	0	0	0	0	1.04044
BnaC06g10900D	0	0	0	0	0	1.04198
BnaC03g50130D	0	0	0	0	0	1.04544
BnaA03g01480D	0	0	0	0	0	1.0457
BnaA09g03060D	0	0	0	0	0	1.04595
BnaA09g27690D	0	0	0	0	0	1.04608
BnaA03g25430D	0	0	0	0	0	1.04609
BnaC09g21180D	0	0	0	0	0	1.04616
BnaC06g00380D	0	0	0	0	0	1.04641
BnaCnng57130D	0	0	0	0	0	1.04662
BnaC08g05950D	0	0	0	0	0	1.04728
BnaC07g50680D	0	0	0	0	0	1.0475
BnaCnng16060D	0	0	0	0	0	1.04777
BnaC09g19270D	0	0	0	0	0	1.04784
BnaA03g16640D	0	0	0	0	0	1.04919
BnaA07g07430D	0	0	0	0	0	1.04925
BnaCnng20770D	0	0	0	0	0	1.04943
BnaA09g33230D	0	0	0	0	0	1.05063
BnaA01g15870D	0	0	0	0	0	1.05211
BnaA02g12120D	0	0	0	0	0	1.05215
BnaA08g22930D	0	0	0	0	0	1.05259
BnaC01g29320D	0	0	0	0	0	1.05264
BnaC07g33180D	0	0	0	0	0	1.05302
BnaC03g58880D	0	0	0	0	0	1.05311
BnaC09g36820D	0	0	0	0	0	1.05338
BnaA10g25790D	0	0	0	0	0	1.05366
BnaC04g45620D	0	0	0	0	0	1.05435
BnaA01g19790D	0	0	0	0	0	1.05439
BnaA09g11230D	0	0	0	0	0	1.05509
BnaAnng00990D	0	0	0	0	0	1.05579
BnaA01g29460D	0	0	0	0	0	1.0561
BnaCnng24950D	0	0	0	0	0	1.05612
BnaC07g44090D	0	0	0	0	0	1.05623
BnaC06g38420D	0	0	0	0	0	1.05628
BnaA09g02880D	0	0	0	0	0	1.05861
BnaC05g44210D	0	0	0	0	0	1.05887
BnaC08g25900D	0	0	0	0	0	1.05918
BnaA07g12110D	0	0	0	0	0	1.05987
BnaC01g42090D	0	0	0	0	0	1.06046
BnaA03g46420D	0	0	0	0	0	1.06057
BnaA01g05900D	0	0	0	0	0	1.06077
BnaC09g07640D	0	0	0	0	0	1.06165
BnaC06g18970D	0	0	0	0	0	1.06177
BnaA09g56530D	0	0	0	0	0	1.06285
BnaA09g33560D	0	0	0	0	0	1.06313
BnaC09g05190D	0	0	0	0	0	1.06322
BnaC02g00380D	0	0	0	0	0	1.06404
BnaC07g23920D	0	0	0	0	0	1.06419
BnaC04g05480D	0	0	0	0	0	1.06514
BnaC09g25130D	0	0	0	0	0	1.06555
BnaA09g49350D	0	0	0	0	0	1.06581
BnaA01g22050D	0	0	0	0	0	1.06646
BnaC05g44000D	0	0	0	0	0	1.06804
BnaA05g27950D	0	0	0	0	0	1.07004
BnaC01g39330D	0	0	0	0	0	1.07089
BnaA02g08090D	0	0	0	0	0	1.07098
BnaA01g10580D	0	0	0	0	0	1.07123
BnaA04g12770D	0	0	0	0	0	1.07199
BnaA03g25960D	0	0	0	0	0	1.07245
BnaC04g03960D	0	0	0	0	0	1.07399
BnaC05g44130D	0	0	0	0	0	1.07417
BnaC09g23480D	0	0	0	0	0	1.07425
BnaA06g13230D	0	0	0	0	0	1.07527
BnaC08g43650D	0	0	0	0	0	1.07566
BnaC01g20500D	0	0	0	0	0	1.07585
BnaA02g01520D	0	0	0	0	0	1.07603
BnaC09g08100D	0	0	0	0	0	1.07627
BnaC08g40500D	0	0	0	0	0	1.07642
BnaC09g06170D	0	0	0	0	0	1.07661
BnaC03g20310D	0	0	0	0	0	1.07772
BnaCnng57670D	0	0	0	0	0	1.07784
BnaC03g37540D	0	0	0	0	0	1.07838
BnaC01g05650D	0	0	0	0	0	1.079
BnaA07g18360D	0	0	0	0	0	1.0791
BnaAnng22440D	0	0	0	0	0	1.07914
BnaA01g29610D	0	0	0	0	0	1.07969
BnaC07g20190D	0	0	0	0	0	1.08025
BnaC01g08580D	0	0	0	0	0	1.08175
BnaC08g45010D	0	0	0	0	0	1.08272
BnaC07g21670D	0	0	0	0	0	1.08287
BnaC02g44050D	0	0	0	0	0	1.08329
BnaCnng38440D	0	0	0	0	0	1.08359
BnaC04g30790D	0	0	0	0	0	1.08524
BnaC05g39300D	0	0	0	0	0	1.08538
BnaA05g17300D	0	0	0	0	0	1.08618
BnaC08g06440D	0	0	0	0	0	1.08662
BnaA06g32690D	0	0	0	0	0	1.08857
BnaA01g16600D	0	0	0	0	0	1.09006
BnaC01g38550D	0	0	0	0	0	1.09052
BnaA04g18980D	0	0	0	0	0	1.09115
BnaA08g30020D	0	0	0	0	0	1.09129
BnaC07g50310D	0	0	0	0	0	1.09168
BnaCnng24910D	0	0	0	0	0	1.09168
BnaA09g34930D	0	0	0	0	0	1.09182
BnaAnng12130D	0	0	0	0	0	1.093
BnaC08g17590D	0	0	0	0	0	1.09455
BnaC05g20420D	0	0	0	0	0	1.09501
BnaA06g23370D	0	0	0	0	0	1.09549
BnaA07g29140D	0	0	0	0	0	1.0958
BnaA04g19840D	0	0	0	0	0	1.09601
BnaA02g19850D	0	0	0	0	0	1.09614
BnaA08g26010D	0	0	0	0	0	1.09659
BnaC05g41220D	0	0	0	0	0	1.09689
BnaC08g36980D	0	0	0	0	0	1.09705
BnaC01g36990D	0	0	0	0	0	1.0975
BnaC06g40040D	0	0	0	0	0	1.09812
BnaA03g57520D	0	0	0	0	0	1.09819
BnaA10g15650D	0	0	0	0	0	1.09938
BnaC05g30260D	0	0	0	0	0	1.10029
BnaA04g22430D	0	0	0	0	0	1.10144
BnaC05g46990D	0	0	0	0	0	1.10289
BnaA09g27270D	0	0	0	0	0	1.10322
BnaA03g03200D	0	0	0	0	0	1.10496
BnaC02g42250D	0	0	0	0	0	1.1052
BnaC07g11980D	0	0	0	0	0	1.10532
BnaA02g26680D	0	0	0	0	0	1.10535
BnaCnng03040D	0	0	0	0	0	1.10607
BnaA03g14580D	0	0	0	0	0	1.1065
BnaA02g25530D	0	0	0	0	0	1.10656
BnaA09g44810D	0	0	0	0	0	1.10805
BnaC08g34700D	0	0	0	0	0	1.10897
BnaC08g42510D	0	0	0	0	0	1.10935
BnaC06g29110D	0	0	0	0	0	1.10986
BnaA02g03050D	0	0	0	0	0	1.11047
BnaC01g11040D	0	0	0	0	0	1.11052
BnaA02g20230D	0	0	0	0	0	1.11081
BnaC07g11210D	0	0	0	0	0	1.11121
BnaA01g16530D	0	0	0	0	0	1.11157
BnaC07g48490D	0	0	0	0	0	1.11314
BnaA03g34240D	0	0	0	0	0	1.1133
BnaA01g05660D	0	0	0	0	0	1.11333
BnaC01g04280D	0	0	0	0	0	1.11441
BnaC07g36250D	0	0	0	0	0	1.11443
BnaC05g18480D	0	0	0	0	0	1.11482
BnaC05g45070D	0	0	0	0	0	1.11593
BnaA09g52410D	0	0	0	0	0	1.11617
BnaA06g34210D	0	0	0	0	0	1.11629
BnaA08g17020D	0	0	0	0	0	1.1165
BnaA02g11890D	0	0	0	0	0	1.11979
BnaC08g00600D	0	0	0	0	0	1.12005
BnaAnng00800D	0	0	0	0	0	1.12059
BnaC08g10200D	0	0	0	0	0	1.1206
BnaC05g44290D	0	0	0	0	0	1.12066
BnaA06g23210D	0	0	0	0	0	1.12107
BnaC08g19950D	0	0	0	0	0	1.12114
BnaA08g22020D	0	0	0	0	0	1.1216
BnaA05g29350D	0	0	0	0	0	1.12265
BnaC06g06210D	0	0	0	0	0	1.12394
BnaC01g02070D	0	0	0	0	0	1.12441
BnaA05g31630D	0	0	0	0	0	1.12494
BnaA07g10420D	0	0	0	0	0	1.12496
BnaA07g13430D	0	0	0	0	0	1.12515
BnaC05g07800D	0	0	0	0	0	1.12541
BnaA03g04640D	0	0	0	0	0	1.12722
BnaC03g73280D	0	0	0	0	0	1.1273
BnaC06g26680D	0	0	0	0	0	1.1273
BnaCnng62280D	0	0	0	0	0	1.12767
BnaA10g15830D	0	0	0	0	0	1.12797
BnaC03g60240D	0	0	0	0	0	1.12919
BnaA08g16320D	0	0	0	0	0	1.13035
BnaC02g34830D	0	0	0	0	0	1.13047
BnaC05g22710D	0	0	0	0	0	1.13053
BnaA09g45450D	0	0	0	0	0	1.13077
BnaC06g06250D	0	0	0	0	0	1.1308
BnaCnng29120D	0	0	0	0	0	1.13325
BnaC03g18600D	0	0	0	0	0	1.13368
BnaA08g13380D	0	0	0	0	0	1.13408
BnaA05g14540D	0	0	0	0	0	1.13592
BnaA06g26790D	0	0	0	0	0	1.13595
BnaC01g24140D	0	0	0	0	0	1.13708
BnaC08g33560D	0	0	0	0	0	1.13778
BnaA05g06450D	0	0	0	0	0	1.13913
BnaA09g26960D	0	0	0	0	0	1.13968
BnaC08g33050D	0	0	0	0	0	1.14031
BnaA09g55850D	0	0	0	0	0	1.14054
BnaA07g31010D	0	0	0	0	0	1.14061
BnaA03g40730D	0	0	0	0	0	1.14189
BnaC03g16650D	0	0	0	0	0	1.14241
BnaC01g44140D	0	0	0	0	0	1.14267
BnaA04g05850D	0	0	0	0	0	1.14278
BnaC05g09070D	0	0	0	0	0	1.14283
BnaA01g01690D	0	0	0	0	0	1.14299
BnaA10g02180D	0	0	0	0	0	1.14381
BnaA07g31410D	0	0	0	0	0	1.14446
BnaCnng02250D	0	0	0	0	0	1.14557
BnaA02g36500D	0	0	0	0	0	1.14566
BnaA01g18660D	0	0	0	0	0	1.14621
BnaA09g28100D	0	0	0	0	0	1.14633
BnaA08g04350D	0	0	0	0	0	1.14637
BnaC03g34690D	0	0	0	0	0	1.1464
BnaAnng15620D	0	0	0	0	0	1.14731
BnaAnng00720D	0	0	0	0	0	1.14847
BnaAnng12470D	0	0	0	0	0	1.14874
BnaA06g30390D	0	0	0	0	0	1.15003
BnaC04g37590D	0	0	0	0	0	1.15054
BnaC07g13450D	0	0	0	0	0	1.15109
BnaC06g36100D	0	0	0	0	0	1.15122
BnaC04g53720D	0	0	0	0	0	1.15127
BnaC02g02650D	0	0	0	0	0	1.15136
BnaC06g13860D	0	0	0	0	0	1.15216
BnaAnng00040D	0	0	0	0	0	1.15218
BnaC05g02740D	0	0	0	0	0	1.15222
BnaC06g37130D	0	0	0	0	0	1.15248
BnaC03g78170D	0	0	0	0	0	1.15265
BnaCnng15960D	0	0	0	0	0	1.15296
BnaC08g39680D	0	0	0	0	0	1.15328
BnaA03g16990D	0	0	0	0	0	1.15341
BnaC07g07290D	0	0	0	0	0	1.15614
BnaAnng03940D	0	0	0	0	0	1.15667
BnaA05g00310D	0	0	0	0	0	1.15764
BnaA03g17020D	0	0	0	0	0	1.15788
BnaA09g04940D	0	0	0	0	0	1.15812
BnaC07g13660D	0	0	0	0	0	1.15951
BnaA09g51790D	0	0	0	0	0	1.15954
BnaC02g08820D	0	0	0	0	0	1.16019
BnaA03g01590D	0	0	0	0	0	1.16098
BnaC05g21260D	0	0	0	0	0	1.1615
BnaC03g25650D	0	0	0	0	0	1.1616
BnaA08g27650D	0	0	0	0	0	1.16167
BnaC03g26070D	0	0	0	0	0	1.16187
BnaA06g03860D	0	0	0	0	0	1.16188
BnaA07g26810D	0	0	0	0	0	1.16209
BnaC03g25840D	0	0	0	0	0	1.16324
BnaC05g00510D	0	0	0	0	0	1.1641
BnaUnng00720D	0	0	0	0	0	1.16415
BnaC09g42440D	0	0	0	0	0	1.16432
BnaC05g41610D	0	0	0	0	0	1.16521
BnaA09g31440D	0	0	0	0	0	1.16551
BnaA01g14130D	0	0	0	0	0	1.16604
BnaC04g15330D	0	0	0	0	0	1.16612
BnaA10g00330D	0	0	0	0	0	1.16614
BnaA10g26390D	0	0	0	0	0	1.16672
BnaA01g11090D	0	0	0	0	0	1.16731
BnaC07g27240D	0	0	0	0	0	1.16752
BnaC02g08370D	0	0	0	0	0	1.16804
BnaA01g29870D	0	0	0	0	0	1.16822
BnaA03g06520D	0	0	0	0	0	1.16837
BnaAnng02310D	0	0	0	0	0	1.16953
BnaC03g37090D	0	0	0	0	0	1.16993
BnaA04g04550D	0	0	0	0	0	1.17144
BnaA02g10760D	0	0	0	0	0	1.17165
BnaC07g26280D	0	0	0	0	0	1.17176
BnaA03g32250D	0	0	0	0	0	1.17238
BnaC02g43800D	0	0	0	0	0	1.17252
BnaA02g34220D	0	0	0	0	0	1.17315
BnaA07g15390D	0	0	0	0	0	1.1732
BnaA03g20980D	0	0	0	0	0	1.17363
BnaA09g40600D	0	0	0	0	0	1.17425
BnaA08g08540D	0	0	0	0	0	1.17442
BnaC08g18790D	0	0	0	0	0	1.17458
BnaC09g02300D	0	0	0	0	0	1.17483
BnaA09g21110D	0	0	0	0	0	1.17533
BnaA05g31930D	0	0	0	0	0	1.17638
BnaA09g05630D	0	0	0	0	0	1.177
BnaA09g07030D	0	0	0	0	0	1.17829
BnaA02g19700D	0	0	0	0	0	1.17872
BnaC03g64590D	0	0	0	0	0	1.17942
BnaC08g22980D	0	0	0	0	0	1.18
BnaA05g20960D	0	0	0	0	0	1.18062
BnaC03g29850D	0	0	0	0	0	1.18071
BnaC01g37230D	0	0	0	0	0	1.18127
BnaC04g22040D	0	0	0	0	0	1.18204
BnaA01g26720D	0	0	0	0	0	1.18356
BnaA07g05940D	0	0	0	0	0	1.1839
BnaC02g47770D	0	0	0	0	0	1.18441
BnaA05g28100D	0	0	0	0	0	1.18455
BnaC08g27270D	0	0	0	0	0	1.18546
BnaA08g10030D	0	0	0	0	0	1.18555
BnaA09g16040D	0	0	0	0	0	1.18564
BnaA06g05280D	0	0	0	0	0	1.18568
BnaA05g01330D	0	0	0	0	0	1.18669
BnaA05g29800D	0	0	0	0	0	1.18671
BnaA06g21300D	0	0	0	0	0	1.18757
BnaCnng10730D	0	0	0	0	0	1.1876
BnaC03g72350D	0	0	0	0	0	1.18776
BnaA07g22650D	0	0	0	0	0	1.188
BnaA06g22070D	0	0	0	0	0	1.18841
BnaC09g15510D	0	0	0	0	0	1.18843
BnaC04g01070D	0	0	0	0	0	1.1888
BnaA09g52450D	0	0	0	0	0	1.18936
BnaA03g31320D	0	0	0	0	0	1.18942
BnaC03g09470D	0	0	0	0	0	1.18952
BnaA04g09570D	0	0	0	0	0	1.19073
BnaC03g22170D	0	0	0	0	0	1.19091
BnaA04g26520D	0	0	0	0	0	1.19181
BnaA03g57940D	0	0	0	0	0	1.19197
BnaC01g02400D	0	0	0	0	0	1.19382
BnaC03g08550D	0	0	0	0	0	1.19423
BnaAnng18240D	0	0	0	0	0	1.19452
BnaA02g25390D	0	0	0	0	0	1.19515
BnaC07g31660D	0	0	0	0	0	1.19575
BnaCnng40390D	0	0	0	0	0	1.19607
BnaC01g39730D	0	0	0	0	0	1.19642
BnaA07g35130D	0	0	0	0	0	1.19759
BnaC07g28790D	0	0	0	0	0	1.19789
BnaA09g38190D	0	0	0	0	0	1.19822
BnaAnng37460D	0	0	0	0	0	1.19916
BnaAnng14330D	0	0	0	0	0	1.19918
BnaA01g30570D	0	0	0	0	0	1.19921
BnaA07g12060D	0	0	0	0	0	1.19949
BnaA09g50330D	0	0	0	0	0	1.1996
BnaA10g21090D	0	0	0	0	0	1.2013
BnaA04g14250D	0	0	0	0	0	1.20153
BnaC05g12030D	0	0	0	0	0	1.204
BnaA07g16170D	0	0	0	0	0	1.20507
BnaC01g41760D	0	0	0	0	0	1.20577
BnaC01g03790D	0	0	0	0	0	1.20654
BnaA03g46510D	0	0	0	0	0	1.20898
BnaA10g28060D	0	0	0	0	0	1.21075
BnaA04g16530D	0	0	0	0	0	1.21101
BnaC04g05380D	0	0	0	0	0	1.21103
BnaC08g46000D	0	0	0	0	0	1.21112
BnaA07g32360D	0	0	0	0	0	1.21173
BnaA10g09180D	0	0	0	0	0	1.21353
BnaC04g21240D	0	0	0	0	0	1.21364
BnaC08g42890D	0	0	0	0	0	1.21405
BnaA08g04220D	0	0	0	0	0	1.21425
BnaCnng07380D	0	0	0	0	0	1.21456
BnaC03g17440D	0	0	0	0	0	1.21465
BnaC07g00560D	0	0	0	0	0	1.21543
BnaA05g23620D	0	0	0	0	0	1.21638
BnaC03g20050D	0	0	0	0	0	1.21672
BnaC02g34800D	0	0	0	0	0	1.21699
BnaC05g01130D	0	0	0	0	0	1.2179
BnaC03g69760D	0	0	0	0	0	1.21875
BnaCnng64600D	0	0	0	0	0	1.22157
BnaC01g20120D	0	0	0	0	0	1.2224
BnaA06g31800D	0	0	0	0	0	1.22256
BnaC09g44670D	0	0	0	0	0	1.22495
BnaA04g24070D	0	0	0	0	0	1.22527
BnaC05g04750D	0	0	0	0	0	1.22584
BnaA07g32230D	0	0	0	0	0	1.22596
BnaA09g00350D	0	0	0	0	0	1.22698
BnaCnng62490D	0	0	0	0	0	1.22738
BnaA07g24600D	0	0	0	0	0	1.22865
BnaC02g06510D	0	0	0	0	0	1.2297
BnaA07g23850D	0	0	0	0	0	1.22974
BnaA03g57550D	0	0	0	0	0	1.22988
BnaA04g04420D	0	0	0	0	0	1.23071
BnaA07g30000D	0	0	0	0	0	1.23072
BnaAnng16300D	0	0	0	0	0	1.23089
BnaA03g24470D	0	0	0	0	0	1.23135
BnaC04g42540D	0	0	0	0	0	1.2315
BnaA05g24870D	0	0	0	0	0	1.23228
BnaA10g10300D	0	0	0	0	0	1.23239
BnaA03g23660D	0	0	0	0	0	1.2324
BnaC08g50020D	0	0	0	0	0	1.2325
BnaA01g24360D	0	0	0	0	0	1.23257
BnaC01g02780D	0	0	0	0	0	1.23323
BnaC08g03570D	0	0	0	0	0	1.23422
BnaC09g36920D	0	0	0	0	0	1.23564
BnaC05g40000D	0	0	0	0	0	1.23629
BnaC01g02370D	0	0	0	0	0	1.23702
BnaC05g27530D	0	0	0	0	0	1.23795
BnaC03g19280D	0	0	0	0	0	1.23804
BnaC03g34330D	0	0	0	0	0	1.2393
BnaA10g10760D	0	0	0	0	0	1.2397
BnaC08g30150D	0	0	0	0	0	1.23972
BnaC09g11490D	0	0	0	0	0	1.24138
BnaA02g29730D	0	0	0	0	0	1.24207
BnaC09g41580D	0	0	0	0	0	1.24216
BnaC09g16320D	0	0	0	0	0	1.24322
BnaA05g23920D	0	0	0	0	0	1.24461
BnaC05g21590D	0	0	0	0	0	1.24564
BnaA10g23790D	0	0	0	0	0	1.24737
BnaA03g37150D	0	0	0	0	0	1.24747
BnaAnng13880D	0	0	0	0	0	1.24807
BnaC09g38120D	0	0	0	0	0	1.24875
BnaC06g16920D	0	0	0	0	0	1.25062
BnaC04g28440D	0	0	0	0	0	1.25237
BnaCnng73390D	0	0	0	0	-2.10693	0
BnaCnng55190D	0	0	0	0	-1.93127	0
BnaC07g36760D	0	0	0	0	-1.87264	0
BnaA02g18700D	0	-2.32663	0	0	-1.81739	0
BnaCnng39740D	0	0	0	0	-1.76676	0
BnaC03g45960D	0	0	0	0	-1.71619	0
BnaA08g24180D	0	-2.20824	0	0	-1.41421	0
BnaA05g34410D	0	0	0	0	-1.25823	0
BnaC04g03400D	0	0	0	0	-1.24236	0
BnaA06g26510D	0	0	0	0	-2.98263	0
BnaC03g22990D	0	0	0	0	-2.81993	0
BnaA06g33560D	0	0	0	0	-2.68986	0
BnaAnng31630D	0	0	0	0	-2.62531	0
BnaC09g37240D	0	0	0	0	-2.43947	0
BnaC09g49910D	0	0	0	0	-2.43578	0
BnaC01g17020D	0	0	0	0	-2.3289	0
BnaC04g04080D	0	0	0	0	-2.27781	0
BnaA08g20230D	0	0	0	0	-4.58124	0
BnaC03g01430D	0	-2.05652	0	0	-3.26073	0
BnaC03g23030D	0	0	0	0	-3.20335	0
BnaA03g37560D	0	0	0	0	5.13422	6.76654
BnaA07g19700D	0	0	0	0	5.38456	6.79251
BnaA05g14020D	0	0	0	0	5.28224	6.82628
BnaC07g28380D	0	0	0	0	4.35736	5.75759
BnaA02g07080D	0	0	0	0	4.90786	6.16643
BnaA08g31700D	0	0	0	0	4.73897	6.32581
BnaC05g00310D	0	0	0	0	4.24563	5.28019
BnaC05g35890D	0	0	0	0	4.21948	5.52855
BnaC08g49130D	0	0	0	0	0	8.00256
BnaA06g27700D	0	0	0	0	3.96218	4.98927
BnaCnng62360D	0	0	0	0	3.73999	5.03343
BnaA06g23180D	0	0	0	0	3.76067	5.04203
BnaCnng14120D	0	0	0	0	3.74026	5.14222
BnaCnng06010D	0	0	0	0	0	7.38247
BnaA09g38810D	0	0	0	0	0	7.45237
BnaA02g29650D	0	0	0	0	0	7.50967
BnaA03g28130D	0	0	0	0	0	7.58138
BnaA03g11060D	0	0	0	0	3.39437	4.51294
BnaC06g28370D	0	0	0	0	3.07181	4.53913
BnaA02g10360D	0	0	0	0	3.28145	4.75448
BnaA01g25310D	0	0	0	0	3.59454	4.8118
BnaC03g06790D	0	0	0	0	3.50935	4.87403
BnaCnng40600D	0	0	0	0	0	6.13142
BnaC08g32060D	0	0	0	0	0	6.13323
BnaA01g33270D	0	0	0	0	0	6.16201
BnaA02g20090D	0	0	0	0	0	6.16203
BnaA08g25390D	0	0	0	0	0	6.16373
BnaC08g48010D	0	0	0	0	0	6.2333
BnaA07g19230D	0	0	0	0	0	6.2578
BnaC02g35900D	0	0	0	0	0	6.2621
BnaA05g18860D	0	0	0	0	0	6.27123
BnaA05g27390D	0	0	0	0	0	6.27839
BnaAnng02720D	0	0	0	0	0	6.27964
BnaC08g01590D	0	0	0	0	0	6.2849
BnaC02g32690D	0	0	0	0	0	6.29147
BnaC04g45990D	0	0	0	0	0	6.29187
BnaC08g42150D	0	0	0	0	0	6.29529
BnaC07g50340D	0	0	0	0	0	6.30995
BnaA04g18240D	0	0	0	0	0	6.31467
BnaUnng03380D	0	0	0	0	0	6.32196
BnaA07g32910D	0	0	0	0	0	6.32261
BnaA07g31360D	0	0	0	0	0	6.34949
BnaA03g25700D	0	0	0	0	0	6.35519
BnaA10g20490D	0	0	0	0	0	6.42007
BnaA03g27580D	0	0	0	0	0	6.42258
BnaC08g33320D	0	0	0	0	0	6.43118
BnaA06g28050D	0	0	0	0	0	6.4313
BnaA03g06060D	0	0	0	0	0	6.4474
BnaA05g33280D	0	0	0	0	0	6.45537
BnaCnng17400D	0	0	0	0	0	6.46967
BnaA09g07000D	0	0	0	0	0	6.50359
BnaA03g41800D	0	0	0	0	0	6.52805
BnaC01g32740D	0	0	0	0	0	6.55356
BnaA07g04970D	0	0	0	0	0	6.58742
BnaA09g00690D	0	0	0	0	0	6.59472
BnaCnng17930D	0	0	0	0	0	6.64723
BnaAnng15700D	0	0	0	0	0	6.66115
BnaC03g21230D	0	0	0	0	0	6.67447
BnaC05g41510D	0	0	0	0	0	6.68555
BnaC07g11050D	0	0	0	0	0	6.68709
BnaA02g31020D	0	0	0	0	0	6.73085
BnaA03g38350D	0	0	0	0	0	6.7698
BnaC05g10990D	0	0	0	0	0	6.77374
BnaC04g13100D	0	0	0	0	0	6.81285
BnaA03g13510D	0	0	0	0	0	6.81577
BnaCnng39520D	0	0	0	0	0	6.81807
BnaC09g38230D	0	0	0	0	0	6.81815
BnaA09g53530D	0	0	0	0	0	6.82017
BnaC04g50020D	0	0	0	0	0	6.83656
BnaCnng52530D	0	0	0	0	0	6.85971
BnaA04g18610D	0	0	0	0	0	6.87938
BnaA03g16500D	0	0	0	0	0	6.88241
BnaA08g02640D	0	0	0	0	0	6.89669
BnaC08g09430D	0	0	0	0	0	6.89695
BnaA08g31690D	0	0	0	0	0	6.9029
BnaC04g21430D	0	0	0	0	0	6.91645
BnaAnng32640D	0	0	0	0	0	6.9417
BnaA01g21610D	0	0	0	0	0	6.94292
BnaC09g41430D	0	0	0	0	0	6.96831
BnaA04g23580D	0	0	0	0	0	6.97332
BnaA01g01260D	0	0	0	0	0	6.97513
BnaC01g20450D	0	0	0	0	0	6.98665
BnaCnng65620D	0	0	0	0	0	6.99084
BnaA03g15420D	0	0	0	0	0	7.00942
BnaA09g30960D	0	0	0	0	0	7.01039
BnaC01g40450D	0	0	0	0	0	7.06969
BnaC02g37670D	0	0	0	0	0	7.08877
BnaC01g02280D	0	0	0	0	0	7.1698
BnaA05g37460D	0	0	0	0	0	7.19806
BnaA08g10070D	0	0	0	0	0	7.22009
BnaC07g46420D	0	0	0	0	1.75645	4.00801
BnaC04g52990D	0	0	0	0	1.75952	4.15057
BnaA09g19780D	0	0	0	0	0	4.28472
BnaC09g38510D	0	0	0	0	0	4.32128
BnaA01g19040D	0	0	0	0	0	4.34455
BnaA03g05250D	0	0	0	0	0	4.37399
BnaUnng03950D	0	0	0	0	0	4.38129
BnaA02g08880D	0	0	0	0	0	4.39135
BnaAnng37370D	0	0	0	0	0	4.41358
BnaA01g04120D	0	0	0	0	0	4.42711
BnaA07g17280D	0	0	0	0	0	4.45236
BnaCnng07860D	0	0	0	0	0	4.4877
BnaA03g28780D	0	0	0	0	0	4.50201
BnaC05g30810D	0	0	0	0	0	4.51972
BnaC08g41860D	0	0	0	0	0	4.54543
BnaC09g31990D	0	0	0	0	0	4.5472
BnaC04g21290D	0	0	0	0	0	4.5973
BnaA08g00950D	0	0	0	0	0	4.65943
BnaA01g15040D	0	0	0	0	0	4.66202
BnaC03g34440D	0	0	0	0	0	4.66659
BnaC03g13800D	0	0	0	0	0	4.73506
BnaC05g37320D	0	0	0	0	0	4.74555
BnaC08g23690D	0	0	0	0	0	4.7628
BnaC02g33350D	0	0	0	0	0	4.80268
BnaA08g31640D	0	0	0	0	0	4.80588
BnaA03g43350D	0	0	0	0	0	4.89967
BnaC04g06780D	0	0	0	0	0	4.94885
BnaA03g03340D	0	0	0	0	0	4.96334
BnaC07g43210D	0	0	0	0	0	4.99297
BnaA02g33450D	0	0	0	0	0	5.03369
BnaCnng06140D	0	0	0	0	0	5.05407
BnaA04g26440D	0	0	0	0	0	5.07725
BnaAnng35930D	0	0	0	0	0	5.10497
BnaA09g17180D	0	0	0	0	0	5.1128
BnaA06g29230D	0	0	0	0	0	5.13223
BnaC08g06180D	0	0	0	0	0	5.16066
BnaA05g01460D	0	0	0	0	0	5.18967
BnaA06g17770D	0	0	0	0	0	5.28925
BnaA07g08200D	0	0	0	0	0	5.30839
BnaC08g36160D	0	0	0	0	0	5.3749
BnaA01g21090D	0	0	0	0	0	5.39013
BnaA10g17960D	0	0	0	0	0	5.40416
BnaC03g13830D	0	0	0	0	0	5.43948
BnaC08g32350D	0	0	0	0	0	5.49244
BnaC08g27500D	0	0	0	0	0	5.51813
BnaA07g28890D	0	0	0	0	0	5.55665
BnaA08g07080D	0	0	0	0	0	5.6442
BnaC04g52260D	0	0	0	0	0	5.67117
BnaC03g25670D	0	0	0	0	0	5.69807
BnaC04g50470D	0	0	0	0	0	5.74548
BnaA04g19460D	0	0	0	0	0	5.74933
BnaC04g02260D	0	0	0	0	0	5.77589
BnaA09g54450D	0	0	0	0	0	5.78725
BnaC06g37490D	0	0	0	0	0	5.7968
BnaCnng52010D	0	0	0	0	0	5.80667
BnaC09g19870D	0	0	0	0	0	5.81563
BnaA06g01900D	0	0	0	0	0	5.83269
BnaAnng02900D	0	0	0	0	0	5.83761
BnaA09g40510D	0	0	0	0	0	5.84007
BnaA07g37210D	0	0	0	0	0	5.84866
BnaA07g36770D	0	0	0	0	0	5.8949
BnaCnng46190D	0	0	0	0	0	5.90929
BnaA06g28420D	0	0	0	0	0	5.91491
BnaCnng43540D	0	0	0	0	0	5.93375
BnaA03g53200D	0	0	0	0	0	5.97254
BnaA01g33910D	0	0	0	0	0	6.00508
BnaC03g16390D	0	0	0	0	0	6.013
BnaC04g22130D	0	0	0	0	0	6.02164
BnaC07g29340D	0	0	0	0	0	6.02857
BnaA04g17590D	0	0	0	0	0	6.03466
BnaC04g56270D	0	0	0	0	0	6.03905
BnaC02g02780D	0	0	0	0	0	6.06448
BnaA02g11540D	0	0	0	0	0	6.06805
BnaA08g19840D	0	0	0	0	0	6.07009
BnaC07g22020D	0	0	0	0	0	6.09029
BnaA07g15460D	0	0	0	0	0	6.10784
BnaA04g19510D	0	0	0	0	0	6.11185
BnaA05g22940D	0	0	0	0	0	6.12159
BnaA09g53050D	0	0	0	0	0	3.92939
BnaC01g18970D	0	0	0	0	0	3.95368
BnaCnng12800D	0	0	0	0	0	3.99419
BnaA02g26590D	0	0	0	0	0	3.99808
BnaC08g17880D	0	0	0	0	0	4.05696
BnaA02g00140D	0	0	0	0	0	4.07033
BnaC07g29210D	0	0	0	0	0	4.07087
BnaA03g17850D	0	0	0	0	0	4.09119
BnaA05g06750D	0	0	0	0	0	4.09467
BnaC08g04570D	0	0	0	0	0	4.09614
BnaC01g39350D	0	0	0	0	0	4.12833
BnaA03g56770D	0	0	0	0	0	4.17561
BnaA09g22150D	0	0	0	0	0	4.19446
BnaC03g06930D	0	0	0	0	0	4.21064
BnaA02g02490D	0	0	0	0	0	4.23999
BnaCnng13110D	0	0	0	0	0	4.2454
BnaC05g15020D	0	0	0	0	0	3.77825
BnaA01g13620D	0	0	0	0	0	3.77903
BnaA05g22600D	0	0	0	0	0	3.79008
BnaA09g13330D	0	0	0	0	0	3.81797
BnaC02g45610D	0	0	0	0	0	3.81828
BnaA07g26300D	0	0	0	0	0	3.82096
BnaC01g37690D	0	0	0	0	0	3.82657
BnaC04g15570D	0	0	0	0	0	3.72324
BnaA05g19830D	0	0	0	0	0	3.72538
BnaCnng07580D	0	0	0	0	0	3.74373
BnaC01g42000D	0	0	0	0	0	3.70486
BnaA07g20240D	0	0	0	0	0	3.69153
BnaC07g38360D	0	0	0	0	0	3.69294

## Sheet: up-regulated PC specific
Bna_gene_id	UP	PCLFD2	PCLFD5	PCLFD10	PCLFD20	PCLFD30
BnaA06g37010D	0	0	0	0	0	1.96814
BnaA01g24530D	0	0	0	0	0	1.41666
BnaA01g19880D	0	0	0	0	0	1.32076
BnaC04g40810D	0	0	0	0	0	2.91518
BnaCnng03810D	0	0	0	0	0	2.71575
BnaC06g31250D	0	0	0	0	0	2.67643
BnaCnng70410D	0	0	0	0	0	2.67544
BnaA02g05510D	0	0	0	0	0	2.50533
BnaA08g09740D	0	0	0	0	0	2.48701
BnaA01g02430D	0	0	0	0	0	2.37652
BnaCnng67300D	0	0	0	0	0	2.35606
BnaCnng39460D	0	0	0	0	0	2.25402
BnaC04g01980D	0	0	0	0	0	2.12682
BnaA07g00460D	0	0	0	0	0	2.02928
BnaC04g17620D	0	0	0	0	0	2.00624
BnaAnng13040D	0	0	0	0	0	1.97612
BnaC03g49470D	0	0	0	0	0	1.92776
BnaA09g25760D	0	0	0	0	0	1.91411
BnaCnng37560D	0	0	0	0	0	1.74275
BnaC02g16640D	0	0	0	0	0	1.65398
BnaC02g38460D	0	0	0	0	0	1.63843
BnaA05g02300D	0	0	0	0	0	1.63006
BnaA08g14970D	0	0	0	0	0	1.62989
BnaA04g27220D	0	0	0	0	0	1.62323
BnaA10g22680D	0	0	0	0	0	1.60163
BnaA02g30040D	0	0	0	0	0	1.57415
BnaA02g20040D	0	0	0	0	0	1.52381
BnaC09g47250D	0	0	0	0	0	1.46585
BnaA08g22240D	0	0	0	0	0	1.43032
BnaA03g53320D	0	0	0	0	0	1.40004
BnaC07g47300D	0	2.62177	3.04547	2.6878	0	2.98147
BnaC03g72320D	0	0	0	0	1.6267	2.2787
BnaA01g06610D	0	0	0	0	1.36103	1.66534
BnaA03g56550D	0	0	0	0	0	3.52769
BnaA02g16020D	0	0	0	0	0	3.35987
BnaC01g15640D	0	0	0	0	0	3.34121
BnaA10g29660D	0	0	1.55258	0	1.81613	2.15432
BnaC03g21360D	0	0	0	1.93657	1.91686	2.44406
BnaA02g31930D	0	0	0	0	2.04788	2.53573
BnaA09g30300D	0	0	0	0	1.90443	2.89464
BnaA02g27990D	0	0	0	0	1.89712	2.30189
BnaA02g20030D	0	0	0	0	1.86581	2.19868
BnaA05g09030D	0	0	0	0	1.77946	2.71874
BnaC03g59280D	0	0	0	0	1.6601	1.78424
BnaCnng76190D	0	0	0	0	1.61816	1.45796
BnaC01g02870D	0	1.61697	1.66322	1.51945	1.78729	2.09023
BnaA06g32020D	0	0	1.94817	0	1.76699	2.10247
BnaCnng28420D	0	0	1.89529	0	1.87274	2.37709
BnaCnng26490D	0	0	0	0	2.47191	2.53805
BnaA05g10680D	0	0	0	0	2.4454	3.28837
BnaA07g29470D	0	0	0	0	2.4311	3.00218
BnaA05g19210D	0	0	0	0	2.4252	2.7811
BnaA06g31630D	0	0	0	0	2.4131	2.33719
BnaA04g10500D	0	0	0	0	2.40536	3.42349
BnaC08g36840D	0	0	0	0	2.40151	2.84044
BnaC08g48860D	0	0	0	0	2.38488	3.17405
BnaC04g24800D	0	0	0	0	2.36614	2.63311
BnaC09g45480D	0	0	0	0	2.35445	3.13079
BnaC08g24010D	0	0	0	0	2.22126	2.63705
BnaC01g32200D	0	0	0	0	2.20937	3.10972
BnaA07g28600D	0	0	0	0	2.11589	2.69823
BnaC07g16820D	0	0	0	0	2.05393	1.99684
BnaA07g36300D	0	0	0	0	2.01549	1.70404
BnaA02g09590D	0	0	0	0	2.00675	2.0942
BnaC06g31950D	0	0	0	0	1.98537	2.05245
BnaA09g26030D	0	0	0	0	1.81753	1.45587
BnaA01g10780D	0	1.92803	1.79814	1.77893	1.92711	1.9935
BnaA08g30600D	0	1.79485	1.72883	1.6254	1.81171	2.14672
BnaA09g47100D	0	1.78187	1.75516	0	2.178	2.48213
BnaC07g20290D	0	1.71847	1.6423	0	2.16436	2.39802
BnaC08g22570D	0	1.62347	1.94785	0	1.95888	2.47571
BnaC01g11140D	0	1.5889	1.72457	0	2.17754	2.39803
BnaCnng51430D	0	0	1.98154	0	2.24204	2.46959
BnaC08g27710D	0	0	0	2.65593	2.81809	2.7627
BnaA06g12890D	0	0	0	2.56351	2.6715	2.87375
BnaC07g49750D	0	0	0	2.42619	2.61245	3.06672
BnaA03g33790D	0	0	0	1.945	2.50059	2.22689
BnaC03g39000D	0	0	0	0	3.37538	2.84339
BnaA04g02800D	0	0	0	0	3.15864	2.80486
BnaC05g23490D	0	0	0	0	3.15551	2.4437
BnaC07g05090D	0	0	0	0	3.15446	2.19183
BnaA07g37360D	0	0	0	0	3.12542	2.53499
BnaCnng56620D	0	0	0	0	3.11782	2.4448
BnaC06g27490D	0	0	0	0	3.11044	3.26447
BnaC03g22390D	0	0	0	0	3.01288	3.05981
BnaA07g15770D	0	0	0	0	2.93775	2.96635
BnaA04g27560D	0	0	0	0	2.91137	3.42535
BnaA07g35260D	0	0	0	0	2.83705	2.81652
BnaA03g10420D	0	0	0	0	2.75012	3.52192
BnaA03g50170D	0	0	0	0	2.73132	3.18648
BnaA01g05060D	0	0	0	0	2.68326	2.83196
BnaA04g15600D	0	0	0	0	2.67916	3.43748
BnaC06g32670D	0	0	0	0	2.62959	3.16699
BnaA06g21090D	0	0	0	0	2.61001	2.95915
BnaC02g09390D	0	0	0	0	2.60888	3.26968
BnaC03g54940D	0	0	0	0	2.59632	3.00182
BnaAnng07270D	0	0	0	0	2.55893	3.19547
BnaC06g38300D	0	0	0	0	2.22568	1.65016
BnaA06g24410D	0	1.99998	2.17469	0	2.17639	2.31228
BnaA02g35880D	0	1.90356	1.95314	1.85713	2.10591	2.29773
BnaC01g12360D	0	1.89407	1.81148	1.66379	2.21277	2.26806
BnaC07g22030D	0	1.8488	1.92495	1.67301	2.22978	2.57768
BnaC04g33430D	0	1.77782	1.80404	1.62141	2.2832	2.67525
BnaA08g09560D	0	1.75634	1.87919	1.65527	2.13468	2.45575
BnaA02g16460D	0	0	0	2.15354	2.84013	3.18524
BnaC04g38620D	0	0	0	1.90809	2.87444	3.49514
BnaA03g55320D	0	0	0	0	3.32179	3.36638
BnaC06g40170D	0	0	0	0	3.24751	3.49868
BnaCnng20480D	0	0	0	0	3.16968	3.91388
BnaC04g23900D	0	0	0	0	3.15725	3.47262
BnaA02g28700D	0	0	0	0	3.1231	4.05505
BnaA06g05490D	0	0	0	0	2.95217	3.60086
BnaA10g07620D	0	0	0	0	2.90027	4.17943
BnaC04g00440D	0	2.15699	2.14599	1.88066	2.21981	2.36592
BnaC08g46700D	0	1.87831	2.04083	1.92052	2.31618	2.57889
BnaA06g35470D	0	1.82284	1.8303	1.68422	2.30384	2.63514
BnaA03g28700D	0	0	0	3.06583	3.16751	3.15973
BnaA07g25880D	0	0	0	2.35944	3.29158	3.45971
BnaC05g50160D	0	0	0	0	3.48866	3.76006
BnaC05g09910D	0	0	0	0	3.477	3.70365
BnaC06g17580D	0	0	0	0	3.41953	3.86601
BnaAnng36730D	0	0	0	0	3.30137	3.99842
BnaA10g11500D	0	0	0	0	3.15859	4.42539
BnaA09g10210D	0	0	2.36771	2.09666	2.39064	2.98385
BnaC09g43250D	0	0	0	0	1.86344	0
BnaC08g17850D	0	0	0	0	1.84754	0
BnaC05g36760D	0	0	0	0	1.72546	0
BnaC03g06120D	0	0	0	0	1.69107	0
BnaA09g15090D	0	0	0	0	1.52271	0
BnaC06g21690D	0	0	0	0	3.76424	0
BnaC08g32840D	0	0	0	0	3.34676	0
BnaC04g32950D	0	0	0	0	2.80325	0
BnaA08g10090D	0	0	0	0	2.73053	0
BnaA07g33680D	0	0	0	0	2.65214	0
BnaA07g33690D	0	0	0	0	2.5766	0
BnaAnng20550D	0	0	0	0	2.36264	0
BnaA07g24860D	0	0	0	0	2.14615	0
BnaA07g20840D	0	0	0	0	2.12572	0
BnaA08g23120D	0	0	0	0	2.12065	0
BnaCnng51340D	0	0	0	0	2.08004	0
BnaC02g45000D	0	0	0	0	2.06162	0
BnaC03g47090D	0	0	0	0	2.03791	0
BnaC08g39210D	0	0	0	0	2.01048	0
BnaCnng51910D	0	0	0	0	1.94431	0
BnaC01g13940D	0	0	0	0	1.93995	0
BnaA09g38900D	0	0	0	0	1.91648	0
BnaC04g07740D	0	0	0	0	1.83064	0
BnaC05g51340D	0	0	0	0	1.81435	0
BnaA07g33410D	0	0	0	0	1.8022	0
BnaC04g56100D	0	0	0	0	1.58601	0
BnaA09g35010D	0	0	0	0	1.56383	0
BnaC02g32000D	0	0	0	0	1.55754	0
BnaA09g52790D	0	0	0	0	1.5101	0
BnaC03g22030D	0	0	0	0	1.50452	0
BnaC06g12160D	0	0	0	0	1.48995	0
BnaA01g01570D	0	0	0	0	1.48323	0
BnaA02g30210D	0	0	0	0	1.45888	0
BnaA10g23320D	0	0	0	0	1.44678	0
BnaC07g11270D	0	0	0	0	1.42006	0
BnaA03g09170D	0	0	0	0	1.40457	0
BnaA10g12840D	0	0	0	0	1.35795	0
BnaCnng67100D	0	0	4.36278	0	4.2768	0

## Sheet: up-regulated PI PC common
Bna_gene_id	UP	PILFD2	PILFD5	PILFD10	PILFD20	PILFD30	PCLFD2	PCLFD5	PCLFD10	PCLFD20	PCLFD30
BnaA01g04520D	0	0	0	0	0	1.87127	0	0	0	1.41177	1.70511
BnaA01g06270D	0	0	0	0	0	2.64343	0	2.10406	0	2.58726	2.76859
BnaA01g06730D	0	0	0	0	1.41184	1.18801	0	0	0	1.55217	0
BnaA01g07750D	0	0	0	0	0	1.60196	0	0	0	1.55132	2.05861
BnaA01g08120D	0	0	0	0	0	1.99515	0	0	0	1.79975	0
BnaA01g09520D	0	0	0	0	1.09817	1.75778	0	0	0	0	1.55823
BnaA01g09740D	0	0	0	0	1.56711	1.76963	0	0	0	1.37514	2.11868
BnaA01g12340D	0	0	0	0	1.94641	1.54414	0	0	0	1.73625	1.73242
BnaA01g15000D	0	0	0	0	1.94946	2.29772	0	0	0	1.90527	2.37204
BnaA01g16370D	0	0	0	0	0	2.09798	0	0	0	1.76411	2.12899
BnaA01g19870D	0	0	0	1.6747	1.59141	1.08724	0	0	0	0	1.60844
BnaA01g28690D	0	0	0	0	2.26994	0	0	0	0	2.049	2.12258
BnaA01g29290D	0	0	0	0	2.84686	3.4224	0	0	0	2.64605	3.57021
BnaA01g30380D	0	0	0	0	0	3.77628	0	0	0	3.60454	3.74553
BnaA01g30830D	0	0	0	0	0	2.26874	0	2.46795	0	2.38971	0
BnaA01g32580D	0	0	0	0	0	6.03094	0	0	0	0	6.01879
BnaA01g34170D	0	0	0	0	0	2.9933	0	0	0	2.2689	2.49006
BnaA02g01510D	0	0	0	0	1.23482	2.07399	0	0	0	1.41954	1.38941
BnaA02g06790D	0	0	0	0	3.21558	3.31338	0	0	0	3.76689	0
BnaA02g06880D	0	0	0	0	1.87664	1.91717	0	0	0	1.7909	0
BnaA02g07040D	0	0	0	0	1.63877	1.54098	0	0	0	0	1.52337
BnaA02g07120D	0	0	0	0	1.20699	2.3545	0	0	0	1.68054	0
BnaA02g10950D	0	0	0	0	0	1.0644	0	0	0	2.31685	1.53586
BnaA02g11430D	0	0	0	0	0	1.66102	0	0	0	2.64661	0
BnaA02g13820D	0	0	0	0	1.78646	1.90093	0	0	0	1.88433	2.09542
BnaA02g20700D	0	0	0	0	1.30049	2.36316	0	0	0	0	1.90083
BnaA02g26600D	0	0	0	0	0	1.64014	0	0	0	0	1.61833
BnaA02g27010D	0	1.82509	0	0	1.63254	2.32169	0	0	0	2.2856	2.49895
BnaA02g30100D	0	0	0	0	1.20612	0	0	0	0	0	1.42293
BnaA02g31900D	0	0	0	0	1.19792	2.26768	0	0	0	1.60849	0
BnaA02g34090D	0	0	0	0	1.20798	1.42475	0	0	0	0	1.52342
BnaA02g34120D	0	0	0	0	1.50187	1.69566	0	0	0	0	1.72663
BnaA02g34140D	0	0	0	0	2.47069	1.7982	0	0	0	2.59083	2.6505
BnaA02g36030D	0	0	0	0	1.44072	2.23769	0	0	0	2.39573	1.64568
BnaA03g00190D	0	0	0	0	1.22931	1.75647	0	0	0	0	1.73239
BnaA03g01040D	0	1.46849	0	0	1.33922	2.28325	0	0	0	2.07558	2.06295
BnaA03g01150D	0	0	0	0	1.52986	2.48447	0	1.74982	0	2.291	2.47985
BnaA03g04590D	0	0	0	0	0	1.08941	0	0	0	1.94549	0
BnaA03g05430D	0	0	0	0	0	3.03653	0	0	0	2.1615	2.56605
BnaA03g07740D	0	1.42828	1.61142	0	1.40302	2.29187	1.50726	1.53457	0	2.04841	2.29579
BnaA03g09530D	0	0	0	0	1.77953	2.18058	0	0	0	2.04152	0
BnaA03g10920D	0	0	0	0	0	1.61921	0	0	0	1.65824	1.81537
BnaA03g13740D	0	0	0	0	0	1.04439	0	0	0	1.87575	0
BnaA03g15380D	0	0	0	0	2.45579	2.01632	0	0	0	2.52542	3.35925
BnaA03g15750D	0	0	0	0	2.32519	2.61736	0	0	0	2.37294	3.56217
BnaA03g16770D	0	0	0	0	0	2.22103	0	0	0	1.86147	0
BnaA03g17030D	0	0	0	0	1.39718	1.96179	0	0	0	1.88362	0
BnaA03g21310D	0	0	0	0	0	1.90437	0	0	0	1.41818	1.82948
BnaA03g21460D	0	0	0	0	0	1.52465	0	0	0	0	2.17147
BnaA03g23010D	0	0	0	0	2.53627	2.69493	0	0	0	2.57374	2.52995
BnaA03g25630D	0	0	0	0	1.5608	1.45563	0	0	0	1.74013	1.82193
BnaA03g26600D	0	0	0	0	0	2.55358	0	0	0	2.91146	2.99083
BnaA03g28540D	0	0	0	0	0	5.21559	0	0	0	0	6.50131
BnaA03g37260D	0	0	0	0	1.448	1.94339	0	0	0	1.36038	2.50239
BnaA03g39840D	0	0	0	0	0	2.24202	0	0	0	2.29879	0
BnaA03g40660D	0	0	0	0	0	1.59321	0	0	0	2.29526	0
BnaA03g40940D	0	0	0	0	1.39945	0	0	0	0	0	1.46075
BnaA03g43160D	0	0	0	0	0	3.4606	0	0	0	0	4.34845
BnaA03g48570D	0	0	0	0	2.35744	2.44479	0	0	0	0	2.40202
BnaA03g48940D	0	0	0	0	0	3.52253	0	0	0	0	4.08997
BnaA03g50900D	0	0	0	0	1.30419	1.46423	0	0	0	0	1.37384
BnaA03g51590D	0	0	0	0	2.06542	0	0	0	0	1.79918	1.97444
BnaA03g55560D	0	0	0	0	0	1.2617	0	0	0	2.24625	0
BnaA03g55860D	0	0	0	0	1.64113	1.89901	0	0	0	2.50658	1.8075
BnaA03g57420D	0	0	0	0	0	4.49209	0	0	0	0	3.72646
BnaA04g00630D	0	0	0	1.54018	1.28589	2.38258	0	0	0	1.99948	2.13604
BnaA04g02430D	0	0	0	0	0	1.88818	0	0	0	0	1.76816
BnaA04g02760D	0	0	0	0	0	1.5616	0	0	0	1.42397	1.4426
BnaA04g05470D	0	0	0	0	2.81232	2.29461	0	0	0	3.02536	2.76012
BnaA04g06040D	0	0	0	0	0	2.55807	0	0	0	2.07545	0
BnaA04g07520D	0	0	0	0	1.46586	0	0	0	0	1.58874	1.78929
BnaA04g09500D	0	0	0	0	2.2869	1.35257	0	0	0	2.00658	1.89261
BnaA04g09680D	0	0	0	0	0	2.66857	0	0	0	2.7055	3.56489
BnaA04g10650D	0	0	0	1.93069	1.43458	0	0	0	0	3.39631	2.6065
BnaA04g18040D	0	0	0	0	1.74833	0	0	0	0	1.9512	2.2367
BnaA04g19600D	0	0	0	0	2.22453	0	0	0	0	0	2.26396
BnaA04g20720D	0	0	0	0	1.83139	1.84423	0	0	0	0	2.14615
BnaA04g22070D	0	0	0	0	0	1.11966	0	0	0	1.8876	0
BnaA04g23070D	0	0	0	0	0	4.54181	0	0	0	0	4.0604
BnaA04g26460D	0	0	0	0	1.60459	2.91497	0	0	0	2.03217	2.52903
BnaA04g29360D	0	1.7299	0	1.98411	0	2.02758	1.95229	0	0	1.81871	2.1045
BnaA05g01610D	0	0	0	0	5.62785	6.95732	0	0	0	6.53993	0
BnaA05g01950D	0	0	0	0	0	5.82724	0	0	0	0	5.62908
BnaA05g02290D	0	0	0	0	0	1.4173	0	0	0	0	1.46437
BnaA05g05700D	0	0	0	0	0	1.27518	0	0	0	0	1.58889
BnaA05g05930D	0	0	0	0	0	1.23183	0	0	0	0	1.68059
BnaA05g06580D	0	0	0	0	0	2.10309	0	0	0	1.82348	0
BnaA05g10700D	0	0	0	0	2.58414	2.12736	0	0	0	2.59334	2.72697
BnaA05g12980D	0	0	0	0	0	1.81793	0	0	0	2.03168	0
BnaA05g16360D	0	0	0	0	0	1.83213	0	0	0	0	2.09051
BnaA05g18570D	0	0	0	0	0	2.95745	0	0	0	0	2.83273
BnaA05g20240D	0	0	0	0	0	1.18416	0	0	0	1.71044	0
BnaA05g22470D	0	0	0	0	1.20024	1.9431	0	0	0	0	1.67434
BnaA05g23160D	0	0	0	0	1.66029	1.32865	0	0	0	1.66606	1.63649
BnaA05g24160D	0	0	0	0	1.45607	1.1656	0	0	0	0	1.94259
BnaA05g24830D	0	0	0	0	1.43012	1.4273	0	0	0	1.3974	2.10229
BnaA05g27280D	0	0	0	0	1.65489	1.71747	0	0	0	0	1.99143
BnaA05g30880D	0	0	0	0	0	1.8012	0	0	0	2.22973	2.63386
BnaA05g31720D	0	0	0	0	0	2.65803	0	0	0	3.28106	3.75165
BnaA05g33110D	0	0	0	0	0	1.59127	0	0	0	2.28555	0
BnaA05g33490D	0	0	0	0	1.4899	2.30261	0	0	0	1.34729	1.90532
BnaA05g34130D	0	0	0	0	0	1.49425	0	0	0	0	1.53896
BnaA05g34540D	0	0	0	0	2.51046	0	0	0	0	2.22312	2.38293
BnaA06g01180D	0	0	0	0	0	1.57463	0	0	0	1.76287	0
BnaA06g01350D	0	0	0	0	0	6.50356	0	0	0	6.03013	0
BnaA06g02960D	0	0	2.53783	0	2.36192	2.24329	0	0	0	2.27981	2.74422
BnaA06g06160D	0	0	0	0	0	2.32067	0	0	0	1.63209	0
BnaA06g08460D	0	0	0	0	0	1.78765	0	0	0	1.57094	1.76466
BnaA06g09070D	0	1.67551	0	0	1.68973	2.57132	0	0	0	2.24963	2.21504
BnaA06g09880D	0	0	0	0	2.7367	1.81951	0	0	0	0	2.54624
BnaA06g10790D	0	0	0	0	0	2.46744	0	0	0	2.24209	2.59257
BnaA06g11320D	0	0	0	0	1.63402	1.17149	0	0	0	2.15587	3.24083
BnaA06g15870D	0	0	0	0	1.49305	1.67186	0	0	0	1.36798	1.40044
BnaA06g17850D	0	0	0	0	1.87071	2.6634	0	0	0	1.98806	2.48058
BnaA06g17950D	0	0	0	0	0	1.32585	0	0	0	0	2.16133
BnaA06g17960D	0	0	0	0	0	1.78941	0	0	0	2.75125	2.84846
BnaA06g18440D	0	0	0	0	1.63651	0	0	0	0	0	1.34414
BnaA06g21470D	0	0	0	0	1.76592	1.7767	0	0	0	0	1.6612
BnaA06g22060D	0	0	0	0	2.1876	2.3542	0	0	0	2.28757	2.48295
BnaA06g23600D	0	0	0	0	2.05989	0	0	0	0	2.09245	2.27674
BnaA06g24830D	0	0	0	0	0	2.92874	0	0	0	0	3.28512
BnaA06g25030D	0	0	0	0	0	1.21674	0	0	0	0	1.4302
BnaA06g25550D	0	0	0	0	1.59345	2.80079	0	0	0	1.98061	2.33287
BnaA06g31300D	0	0	0	0	0	3.0634	0	0	0	0	3.45806
BnaA06g31640D	0	0	0	0	1.56614	1.28904	0	0	0	1.99919	1.86295
BnaA06g33260D	0	0	0	0	0	1.674	0	0	0	1.49831	1.61707
BnaA06g33910D	0	0	0	0	1.17511	1.86922	0	0	0	0	1.95982
BnaA06g33960D	0	0	0	0	0	1.43426	0	0	0	0	1.75048
BnaA06g34240D	0	0	0	0	0	1.18267	0	0	0	1.33364	0
BnaA06g34320D	0	0	0	0	0	1.5855	0	0	0	2.19582	0
BnaA06g34530D	0	0	0	0	1.31369	0	0	0	0	0	1.78993
BnaA06g34760D	0	0	0	0	0	6.19808	0	0	0	0	5.74146
BnaA06g35100D	0	0	0	0	1.97651	1.76837	0	0	0	1.77618	2.01905
BnaA06g35120D	0	0	0	0	2.09088	0	0	0	0	2.2131	2.37095
BnaA06g36710D	0	0	0	0	1.62401	0	0	0	0	1.67027	0
BnaA06g38470D	0	0	0	0	1.4441	1.92688	0	0	0	1.79935	1.80899
BnaA06g40080D	0	0	0	0	0	1.12703	0	0	0	1.29034	0
BnaA06g40660D	0	0	0	0	0	2.33824	0	0	0	2.15266	0
BnaA07g03490D	0	0	0	0	0	2.55723	0	0	0	3.03616	3.79343
BnaA07g06460D	0	0	0	0	0	1.35046	0	0	0	0	1.65383
BnaA07g10650D	0	0	0	0	0	1.41902	0	0	0	0	1.53834
BnaA07g12410D	0	0	0	0	2.14249	0	0	0	0	2.31875	2.48095
BnaA07g14070D	0	0	0	0	2.78791	3.36431	0	0	0	2.84367	2.98706
BnaA07g14280D	0	0	0	0	0	1.72483	0	0	0	1.6636	0
BnaA07g17850D	0	0	0	0	0	1.31941	0	0	0	0	1.65571
BnaA07g21490D	0	0	0	0	1.67965	2.48849	0	0	0	1.78077	0
BnaA07g25350D	0	1.94507	0	0	0	2.80199	0	2.096	0	2.68467	3.13664
BnaA07g27960D	0	0	0	0	0	1.74253	0	0	0	0	1.63005
BnaA07g28840D	0	0	0	0	1.74283	1.51587	0	0	0	1.65209	1.96195
BnaA07g30990D	0	0	0	0	0	1.60253	0	0	0	0	2.09595
BnaA07g32220D	0	0	0	0	0	1.32963	0	0	0	1.41292	0
BnaA07g32920D	0	0	0	0	0	6.88743	0	0	0	6.23426	0
BnaA07g33470D	0	0	0	0	0	1.88042	0	0	0	0	2.1862
BnaA07g35790D	0	0	0	0	1.81616	1.13099	0	0	0	2.25118	1.84495
BnaA07g35800D	0	0	0	0	1.78645	1.71367	0	0	0	1.75717	1.90729
BnaA07g38550D	0	0	0	0	1.79588	2.97044	0	0	0	2.30723	0
BnaA07g38960D	0	0	0	0	0	2.29691	0	0	0	0	1.73782
BnaA08g01830D	0	0	0	2.43479	2.11818	0	0	0	0	2.11629	2.35204
BnaA08g07360D	0	0	0	0	1.89857	2.99601	0	0	0	2.79432	1.53658
BnaA08g11240D	0	0	0	0	0	2.57394	0	0	0	0	2.79207
BnaA08g11740D	0	0	0	1.84153	1.74621	1.26167	0	0	0	1.97144	2.57782
BnaA08g13650D	0	0	0	0	1.59587	1.97571	0	0	0	0	1.43962
BnaA08g15200D	0	0	0	0	0	1.56152	0	0	0	1.4915	0
BnaA08g17380D	0	0	0	0	1.9627	2.80142	0	0	0	1.95692	2.64851
BnaA08g17810D	0	0	0	0	1.29642	1.12584	0	0	0	0	1.39929
BnaA08g21940D	0	0	0	0	4.1009	0	0	0	0	3.6424	3.84992
BnaA08g22180D	0	0	0	0	0	1.31704	0	0	0	0	2.07351
BnaA08g22690D	0	0	0	2.09941	0	1.18833	0	0	1.88073	1.73867	2.21336
BnaA08g22720D	0	0	0	0	1.90086	1.63923	0	0	0	3.00837	1.91765
BnaA08g23020D	0	0	0	0	2.82686	3.4025	0	0	0	2.92914	3.28172
BnaA08g23150D	0	0	0	0	1.6478	1.648	0	0	0	1.83335	1.7068
BnaA08g24480D	0	0	0	0	1.45117	1.32108	0	0	0	1.65194	2.04693
BnaA08g24680D	0	0	0	0	0	2.23388	0	0	0	2.16232	0
BnaA08g25990D	0	0	0	0	1.51319	2.1195	0	0	0	0	2.14347
BnaA08g26170D	0	0	0	0	0	1.44634	0	0	0	1.48145	0
BnaA08g26490D	0	0	0	0	0	1.65206	0	0	0	1.82153	0
BnaA08g28140D	0	0	0	0	0	1.88186	0	0	0	0	1.41817
BnaA09g03100D	0	0	0	0	1.72502	2.24947	0	0	0	1.82524	2.4329
BnaA09g04280D	0	0	0	0	0	1.6831	0	0	0	2.91279	0
BnaA09g04420D	0	0	0	0	0	2.74314	0	0	0	0	2.6283
BnaA09g05080D	0	0	0	0	0	1.65743	0	0	0	0	1.68928
BnaA09g07140D	0	0	0	0	1.87232	1.82386	0	0	0	2.02811	2.20368
BnaA09g08470D	0	0	0	0	0	1.60295	0	0	0	2.48463	0
BnaA09g08810D	0	0	0	0	0	1.80305	0	0	0	1.90625	0
BnaA09g15080D	0	0	0	0	0	1.29248	0	0	0	2.00039	0
BnaA09g17090D	0	0	0	0	0	1.83908	0	0	0	0	1.70552
BnaA09g18500D	0	0	0	0	1.96759	1.28068	0	0	0	2.24578	2.37265
BnaA09g21860D	0	0	0	2.1364	2.37566	0	0	0	0	0	1.71465
BnaA09g22670D	0	0	0	0	0	1.56693	0	0	0	0	1.64634
BnaA09g24630D	0	0	0	0	0	1.15206	0	0	0	0	1.69172
BnaA09g25690D	0	0	0	0	1.38141	1.64791	0	0	0	0	1.82802
BnaA09g27390D	0	0	0	0	0	2.87884	0	0	0	3.37114	0
BnaA09g30080D	0	0	0	0	0	1.44236	0	0	0	0	1.77187
BnaA09g30760D	0	0	0	0	2.41098	2.05968	0	0	0	1.96532	2.41736
BnaA09g30800D	0	0	0	0	1.21837	1.85439	0	0	0	1.69236	2.01116
BnaA09g30920D	0	0	0	0	1.29298	0	0	0	0	1.4164	1.54715
BnaA09g31110D	0	0	0	0	1.59754	2.6074	0	0	0	2.34971	2.49826
BnaA09g35450D	0	0	0	0	2.04769	2.71045	0	0	0	1.77094	2.17461
BnaA09g36180D	0	0	0	2.54363	2.04867	0	0	0	0	2.49878	2.18135
BnaA09g36730D	0	0	0	0	0	2.03854	0	0	0	0	1.83318
BnaA09g36820D	0	0	0	1.75243	2.0087	0	0	0	0	1.73431	1.8296
BnaA09g41600D	0	1.83758	0	0	0	2.29988	0	1.74542	0	2.00956	1.9291
BnaA09g41810D	0	0	0	0	2.60522	3.01696	0	0	0	2.50894	2.31978
BnaA09g42610D	0	0	0	0	1.38503	1.15994	0	0	0	1.61722	0
BnaA09g43130D	0	0	0	0	2.29428	2.94488	0	0	0	2.49009	2.72339
BnaA09g43560D	0	0	0	0	3.16182	4.83732	0	0	0	3.40247	0
BnaA09g44300D	0	0	0	0	1.31349	0	0	0	0	0	1.68964
BnaA09g47690D	0	0	0	0	0	6.65668	0	0	0	6.10077	0
BnaA09g47910D	0	0	0	0	2.29839	0	0	0	0	0	2.18211
BnaA09g48680D	0	0	0	0	1.505	1.49757	0	0	0	0	1.71506
BnaA09g51200D	0	0	0	0	0	1.43015	0	0	0	0	1.40639
BnaA09g51230D	0	0	0	0	1.22306	1.0309	0	0	0	0	1.94376
BnaA09g51620D	0	0	0	0	1.81222	3.49712	0	0	0	2.14788	2.6142
BnaA09g53450D	0	0	0	0	0	3.5071	0	0	0	0	4.05341
BnaA10g00370D	0	0	0	0	0	1.87654	0	0	0	1.78236	0
BnaA10g02600D	0	0	0	0	0	6.91819	0	0	0	0	6.78526
BnaA10g07250D	0	0	0	0	0	2.28119	0	0	0	2.09886	0
BnaA10g07320D	0	0	0	0	0	1.12305	0	0	0	0	1.45748
BnaA10g07760D	0	0	0	0	0	1.51625	0	0	0	1.70408	0
BnaA10g08320D	0	0	0	0	2.44612	2.51569	0	0	0	2.43757	2.24267
BnaA10g10580D	0	0	0	1.70355	0	1.92974	1.73131	1.71414	0	1.80498	2.0639
BnaA10g11710D	0	0	0	0	0	2.457	0	0	0	2.44242	2.515
BnaA10g12720D	0	0	0	0	1.67513	1.91253	0	0	0	1.48676	1.50065
BnaA10g12780D	0	0	0	0	2.17351	1.59153	0	0	0	2.17825	2.11235
BnaA10g12960D	0	0	0	0	1.68389	2.5093	0	0	0	1.53946	0
BnaA10g14750D	0	0	0	0	0	2.46148	0	0	0	2.00079	0
BnaA10g17590D	0	0	0	0	1.70567	2.43109	0	0	0	1.73195	2.36781
BnaA10g18690D	0	0	0	0	1.68617	1.27732	0	0	0	0	2.01134
BnaA10g19670D	0	0	0	0	0	1.1814	0	0	0	2.32718	0
BnaA10g20920D	0	0	0	0	0	1.59484	0	0	0	0	1.60097
BnaA10g23500D	0	0	0	0	0	1.51638	0	0	0	1.61614	0
BnaA10g23820D	0	0	0	0	1.51419	2.36609	0	0	0	1.78771	1.80069
BnaA10g25000D	0	0	0	0	0	1.20051	0	0	0	1.42658	1.58926
BnaA10g25120D	0	0	0	0	0	1.29216	0	0	0	2.08658	0
BnaA10g25720D	0	0	0	0	0	1.54307	0	0	0	0	1.66236
BnaAnng03040D	0	0	0	0	0	2.50682	0	0	0	2.39158	2.44732
BnaAnng03830D	0	0	0	0	0	1.64016	0	0	0	0	2.33155
BnaAnng04790D	0	0	0	0	2.02632	2.1212	0	0	0	2.293	2.74207
BnaAnng08350D	0	0	0	0	1.92394	3.13885	0	0	0	2.13194	2.84343
BnaAnng09500D	0	0	0	0	2.27672	2.85655	0	0	0	2.76661	3.0648
BnaAnng10520D	0	0	0	0	0	2.79574	0	0	0	2.92159	2.90363
BnaAnng11580D	0	0	0	0	1.14025	0	0	0	0	0	1.74508
BnaAnng14710D	0	0	0	0	1.61636	1.24032	0	0	0	1.57014	1.68927
BnaAnng17740D	0	0	0	0	0	1.33865	0	1.66368	0	1.99638	2.7338
BnaAnng17910D	0	0	0	0	1.63178	3.34842	0	0	0	2.19306	2.9981
BnaAnng17960D	0	0	0	0	0	2.73338	0	0	0	2.41596	2.9206
BnaAnng19370D	0	0	0	0	2.68994	3.20525	0	0	0	2.46046	2.86086
BnaAnng20740D	0	0	0	0	1.751	2.55361	0	0	0	2.33412	2.4149
BnaAnng21760D	0	0	2.42046	0	2.28289	3.2107	0	0	2.32838	2.47677	3.20861
BnaAnng22680D	0	0	0	0	0	2.96883	0	0	0	0	2.92707
BnaAnng27200D	0	0	0	0	1.73433	0	0	0	0	0	1.75574
BnaAnng29030D	0	0	0	0	1.59073	2.62845	0	0	0	2.45714	1.97659
BnaAnng29470D	0	0	0	0	0	2.15518	0	0	0	1.85737	0
BnaAnng29590D	0	0	0	0	1.63169	1.64758	0	0	0	1.47547	1.55839
BnaAnng31270D	0	0	0	0	0	1.44067	0	0	0	0	1.62317
BnaAnng32290D	0	0	0	0	0	1.86649	0	0	0	0	1.8291
BnaAnng32610D	0	0	0	0	2.2755	2.25902	0	0	0	2.65946	2.42493
BnaAnng32690D	0	0	0	0	1.5373	1.70156	0	0	0	1.77428	0
BnaAnng33440D	0	0	0	0	1.2086	2.47363	0	0	0	2.23529	0
BnaAnng34650D	0	0	0	0	0	1.82807	0	0	0	1.71178	1.70205
BnaAnng37080D	0	0	0	0	0	2.07278	0	0	0	2.12903	0
BnaAnng37270D	0	0	0	0	0	1.83568	0	0	0	2.81586	0
BnaAnng40320D	0	0	0	0	0	1.14049	0	0	0	0	1.48483
BnaC01g00200D	0	0	0	0	0	7.09451	0	0	0	0	6.85305
BnaC01g04460D	0	0	0	0	0	1.37163	0	0	0	1.48467	0
BnaC01g04860D	0	0	0	1.93237	2.35548	0	0	0	0	0	1.43929
BnaC01g07220D	0	0	0	0	0	1.86118	0	0	0	1.46258	1.81954
BnaC01g07540D	0	0	0	0	1.99816	2.87484	0	0	0	2.58074	2.82579
BnaC01g09700D	0	0	0	0	0	1.01792	0	0	0	1.72816	0
BnaC01g11030D	0	0	0	0	0	2.23986	0	0	0	0	2.58389
BnaC01g11450D	0	0	0	0	1.19831	1.49497	0	0	0	0	1.9062
BnaC01g11610D	0	0	0	0	1.32287	1.99615	0	0	0	1.44888	1.89203
BnaC01g12370D	0	0	0	0	0	1.87992	0	0	0	1.58651	1.7621
BnaC01g16430D	0	0	0	0	0	1.93922	0	0	0	2.09545	2.25433
BnaC01g17060D	0	0	0	0	0	2.7752	0	2.26664	0	2.4449	2.95173
BnaC01g17710D	0	0	0	0	2.13214	2.28293	0	0	0	2.1965	2.68009
BnaC01g19520D	0	0	0	0	0	1.78961	0	0	0	1.46456	1.88871
BnaC01g19800D	0	0	0	0	0	1.36507	0	0	0	0	1.32958
BnaC01g20780D	0	0	0	0	0	1.34204	0	0	0	1.40093	0
BnaC01g24660D	0	0	0	0	1.95839	0	0	0	0	0	1.93817
BnaC01g27440D	0	0	0	0	1.2476	1.69011	0	0	0	0	1.61804
BnaC01g29540D	0	0	0	0	0	6.35514	0	0	0	0	6.01815
BnaC01g32590D	0	0	0	0	0	1.52651	0	0	0	1.7318	0
BnaC01g36720D	0	0	0	0	2.47873	3.54887	0	0	0	2.55089	3.40052
BnaC01g44940D	0	0	0	0	0	1.71983	0	0	0	0	1.91174
BnaC02g04560D	0	0	0	0	1.66206	2.31365	0	0	0	1.72362	1.91992
BnaC02g05070D	0	0	0	0	0	1.51893	0	0	0	1.94321	0
BnaC02g06930D	0	0	0	0	2.5451	3.31524	0	0	0	2.17489	3.23901
BnaC02g08380D	0	0	0	0	0	6.52048	0	0	0	6.1132	0
BnaC02g09510D	0	1.48705	0	0	1.50246	2.94911	0	0	0	2.16455	0
BnaC02g10060D	0	0	0	0	0	2.24309	0	0	0	2.0507	0
BnaC02g12100D	0	0	0	0	0	3.21807	0	0	0	0	3.94383
BnaC02g15950D	0	0	0	0	0	1.78599	0	2.38848	0	2.4571	0
BnaC02g18150D	0	0	0	0	1.21514	1.11867	0	0	0	0	1.49843
BnaC02g27050D	0	0	0	0	1.54644	2.36386	0	0	0	1.62663	2.00158
BnaC02g31870D	0	0	0	0	0	3.70042	0	0	0	0	3.42582
BnaC02g33330D	0	0	0	0	0	1.70939	0	0	0	0	1.83297
BnaC02g34540D	0	0	0	0	2.41654	3.14747	0	0	0	2.64585	0
BnaC02g34840D	0	0	0	0	1.47277	2.16213	0	0	0	1.79842	2.16612
BnaC02g35530D	0	0	0	0	1.76468	0	0	0	0	0	1.79729
BnaC02g36110D	0	0	0	0	2.29259	3.26733	0	0	2.40481	2.37772	3.09847
BnaC02g37260D	0	0	0	0	1.79785	2.29872	0	0	0	0	1.83038
BnaC02g38520D	0	0	0	0	1.2044	0	0	0	0	0	1.51725
BnaC02g39630D	0	0	0	0	0	1.81492	0	0	0	0	1.79467
BnaC02g41520D	0	0	0	0	0	1.53055	0	0	0	1.69009	0
BnaC02g42100D	0	0	0	0	1.972	2.86509	0	0	0	1.88249	2.61405
BnaC02g43000D	0	0	0	0	1.64396	1.3456	0	0	0	1.6728	1.47518
BnaC02g48560D	0	0	0	0	0	2.26612	0	0	0	1.65694	0
BnaC02g48610D	0	0	0	0	0	2.18517	0	2.57093	0	2.30296	3.13306
BnaC02g48820D	0	0	0	0	1.48756	1.66217	0	0	0	0	1.63594
BnaC03g03040D	0	0	0	0	5.89017	7.15027	0	0	0	6.83459	0
BnaC03g06960D	0	1.45906	0	1.67908	0	2.04062	1.41354	1.69749	0	1.56362	2.0388
BnaC03g08040D	0	0	0	0	0	1.73476	0	0	0	0	1.84008
BnaC03g11570D	0	0	0	0	2.9581	3.19203	0	0	0	3.24484	0
BnaC03g11820D	0	0	0	0	1.35232	0	0	0	0	0	1.4047
BnaC03g13600D	0	1.5779	0	0	1.32167	2.21837	0	1.92275	0	1.6079	2.00432
BnaC03g14350D	0	0	0	0	0	2.47925	0	0	0	2.11625	0
BnaC03g14810D	0	0	0	0	0	1.55354	0	0	0	1.72342	0
BnaC03g18040D	0	0	0	0	0	1.44889	0	0	0	1.39989	0
BnaC03g18590D	0	0	0	0	1.63774	1.52823	0	0	0	0	2.53492
BnaC03g21390D	0	0	0	0	0	2.97548	0	0	0	2.4529	2.6086
BnaC03g22200D	0	0	0	0	1.28718	0	0	0	0	1.83681	0
BnaC03g23130D	0	0	0	0	1.58917	1.98997	0	0	0	1.56085	1.88477
BnaC03g25270D	0	0	0	0	0	2.68328	0	0	0	3.02963	2.88014
BnaC03g27140D	0	0	0	1.69506	1.78287	1.78258	0	0	0	1.8351	2.06308
BnaC03g30070D	0	0	0	0	1.33498	1.16298	0	0	0	1.26331	0
BnaC03g30130D	0	0	0	0	0	1.80721	0	0	0	0	2.27795
BnaC03g31100D	0	0	0	0	0	1.186	0	0	0	0	1.61568
BnaC03g32570D	0	0	0	0	0	6.40122	0	0	0	0	6.1981
BnaC03g33680D	0	0	0	0	1.11651	1.86199	0	0	0	0	1.55549
BnaC03g33810D	0	0	0	0	0	2.28163	0	0	0	1.68769	2.06415
BnaC03g39170D	0	0	0	0	1.96843	3.11206	0	0	0	2.68003	2.50454
BnaC03g40170D	0	0	0	0	1.46301	2.32663	0	0	0	1.59995	2.31654
BnaC03g41310D	0	0	0	0	1.38773	1.64742	0	0	0	0	1.78331
BnaC03g48070D	0	0	0	0	1.66626	2.75892	0	0	0	2.16303	2.62827
BnaC03g48540D	0	0	0	0	0	1.3975	0	0	0	0	1.34536
BnaC03g48600D	0	0	0	0	0	1.45115	0	0	0	0	1.41576
BnaC03g52390D	0	0	0	0	2.0159	2.52171	0	0	0	2.0534	2.48143
BnaC03g52400D	0	0	0	0	1.92488	2.29426	0	0	0	1.88467	2.31581
BnaC03g56160D	0	0	0	0	1.2448	1.79351	0	0	0	1.34752	1.75983
BnaC03g56180D	0	0	0	0	0	2.845	0	0	0	2.65854	2.94218
BnaC03g56410D	0	0	0	0	1.26248	1.13448	0	0	0	1.44296	1.39006
BnaC03g56970D	0	0	0	0	1.10519	1.28432	0	0	0	0	1.78613
BnaC03g57350D	0	0	0	0	0	3.47757	0	0	0	2.94669	0
BnaC03g58590D	0	0	0	0	2.41082	0	0	0	0	2.62099	0
BnaC03g58870D	0	0	0	0	1.80151	2.33712	0	0	0	0	2.49527
BnaC03g62800D	0	0	0	1.58127	1.34793	2.27562	0	1.54741	0	1.93811	2.17401
BnaC03g66270D	0	0	0	1.56389	1.8046	1.39734	0	0	0	1.87614	2.33424
BnaC03g69560D	0	0	0	0	1.10615	1.61423	0	0	0	1.53109	1.76828
BnaC03g73380D	0	0	0	0	0	6.73249	0	0	0	0	6.55167
BnaC03g73930D	0	0	0	0	3.03262	0	0	0	0	3.26649	3.52973
BnaC03g74630D	0	0	0	0	0	2.01698	0	0	0	2.08377	2.22815
BnaC03g78270D	0	0	0	0	1.87314	2.47262	0	0	0	2.13814	2.23998
BnaC04g03750D	0	0	0	0	0	1.81484	0	0	0	1.89587	0
BnaC04g05790D	0	0	0	0	1.51077	1.73013	0	0	0	0	2.08762
BnaC04g15370D	0	0	0	0	0	2.01346	0	0	0	3.37664	0
BnaC04g24260D	0	0	0	0	0	1.42788	0	0	0	0	1.4933
BnaC04g26710D	0	0	0	0	0	1.54582	0	0	0	0	1.71682
BnaC04g27770D	0	0	0	0	1.55959	0	0	0	0	0	1.81132
BnaC04g27800D	0	0	0	0	1.1651	1.19925	0	0	0	0	1.39657
BnaC04g28220D	0	0	0	0	3.01742	2.81805	0	0	0	3.24422	3.08869
BnaC04g28260D	0	0	0	0	0	2.58766	0	0	0	2.02318	2.55603
BnaC04g29740D	0	0	0	0	1.35566	0	0	0	0	0	1.58838
BnaC04g31430D	0	0	0	0	0	6.47145	0	0	0	5.87088	0
BnaC04g32770D	0	0	0	0	0	2.307	0	0	0	0	2.32343
BnaC04g34480D	0	0	0	0	1.33729	1.46369	0	0	0	1.43969	1.68695
BnaC04g38330D	0	0	0	0	0	2.49309	0	0	0	1.48799	0
BnaC04g41140D	0	0	0	0	1.38089	2.02878	0	0	0	1.50069	2.24197
BnaC04g43980D	0	0	0	0	2.15081	0	0	0	0	0	1.98788
BnaC04g45600D	0	0	0	0	0	2.22128	0	0	0	2.15169	2.51521
BnaC04g46450D	0	0	0	0	0	1.36463	0	0	0	0	1.53228
BnaC04g48670D	0	0	0	0	1.26897	1.931	0	0	0	0	2.08831
BnaC04g50490D	0	0	0	0	0	2.34612	0	0	0	1.65559	2.17777
BnaC04g50850D	0	0	0	0	1.14619	1.85346	0	0	0	0	1.56157
BnaC04g55020D	0	0	0	0	1.64635	2.60632	0	0	0	0	2.07404
BnaC05g01680D	0	0	0	0	0	6.38633	0	0	0	5.80183	0
BnaC05g09840D	0	1.61665	1.6743	0	0	2.02454	0	1.6323	0	1.83095	1.93764
BnaC05g09920D	0	0	0	0	1.55381	2.64939	0	0	0	0	1.9346
BnaC05g10520D	0	0	0	0	1.42856	2.06393	0	0	0	1.77724	1.91471
BnaC05g10770D	0	0	0	0	2.27955	3.15228	0	0	0	1.75143	1.78067
BnaC05g14050D	0	0	0	0	0	1.30847	0	0	0	1.97346	2.06008
BnaC05g15590D	0	0	0	0	0	1.42293	0	0	0	0	1.53534
BnaC05g17150D	0	0	0	0	0	1.29408	0	0	0	0	1.54977
BnaC05g17480D	0	0	0	0	2.13914	1.61387	0	0	0	1.75998	2.14964
BnaC05g17530D	0	0	0	0	0	1.29713	0	0	0	0	1.45646
BnaC05g19630D	0	0	0	0	1.34805	1.49612	0	0	0	1.49216	1.7501
BnaC05g21480D	0	0	0	0	2.75856	0	0	0	0	2.60805	2.68637
BnaC05g24240D	0	0	0	0	0	1.60031	0	0	0	0	1.55358
BnaC05g25300D	0	0	0	0	0	2.05371	0	0	0	0	2.08766
BnaC05g25430D	0	0	0	0	0	3.31425	0	0	0	0	3.65027
BnaC05g32670D	0	0	0	0	0	2.77037	0	0	0	2.65848	2.91744
BnaC05g33800D	0	0	0	0	1.11386	1.36239	0	0	0	0	1.70505
BnaC05g36000D	0	1.92505	0	0	1.77714	2.66951	0	0	0	2.10648	2.36026
BnaC05g36370D	0	0	0	0	0	5.17704	0	0	0	0	5.9855
BnaC05g38940D	0	0	0	0	2.95428	4.51043	0	0	2.33983	2.84882	3.49019
BnaC05g45340D	0	0	0	0	0	1.43709	0	0	0	0	1.8058
BnaC05g47350D	0	0	0	0	0	2.00472	0	0	0	2.97068	0
BnaC05g48240D	0	0	0	0	1.81987	2.52513	0	0	0	1.70508	2.14554
BnaC05g48570D	0	0	0	0	0	1.77456	0	0	0	1.39312	1.71153
BnaC05g50380D	0	0	0	0	0	3.62442	0	0	0	3.64072	3.74787
BnaC06g00180D	0	0	0	0	0	1.83597	0	0	0	1.44241	1.49123
BnaC06g05410D	0	0	0	0	0	2.6373	0	0	0	2.24504	2.553
BnaC06g06860D	0	0	0	0	0	2.21359	0	0	0	1.68415	1.8444
BnaC06g13430D	0	0	0	0	0	2.926	0	0	0	2.82516	3.27964
BnaC06g14100D	0	0	0	0	1.55674	1.55602	0	0	0	1.55678	1.75694
BnaC06g15040D	0	0	0	0	1.91785	2.72182	0	0	0	2.67784	2.69639
BnaC06g16600D	0	0	0	0	0	1.34726	0	0	0	0	1.357
BnaC06g18540D	0	0	0	0	0	1.47719	0	0	0	0	1.48916
BnaC06g21970D	0	0	0	0	1.89948	3.11296	0	0	0	2.36356	1.37146
BnaC06g23310D	0	0	0	0	0	1.18186	0	0	0	0	1.53315
BnaC06g23720D	0	0	0	0	1.90699	2.6874	0	0	0	1.81085	2.58507
BnaC06g24480D	0	0	0	0	0	2.14273	0	0	0	1.96801	2.281
BnaC06g26190D	0	0	0	0	0	1.51191	0	0	0	2.52542	0
BnaC06g27130D	0	0	0	0	0	2.8016	0	0	0	0	4.13054
BnaC06g31000D	0	0	0	0	0	2.47259	0	0	0	0	3.09837
BnaC06g31180D	0	0	0	0	2.01285	2.10869	0	0	0	2.34915	2.27841
BnaC06g31880D	0	0	0	0	1.64505	1.06579	0	0	0	1.6084	1.74117
BnaC06g31940D	0	0	0	0	1.57961	1.82412	0	0	0	1.97643	2.40851
BnaC06g36590D	0	0	0	0	0	1.63667	0	0	0	2.13214	0
BnaC06g36880D	0	0	0	0	0	2.07401	0	0	0	0	1.39054
BnaC06g37510D	0	0	0	0	2.48593	1.92087	0	0	0	2.76992	2.50589
BnaC06g37960D	0	0	0	0	0	1.3219	0	0	0	1.7241	0
BnaC06g38020D	0	0	0	0	0	1.84508	0	0	0	0	1.67125
BnaC06g40000D	0	0	0	0	0	1.33039	0	0	0	0	1.74317
BnaC06g43540D	0	0	0	0	1.4449	0	0	0	0	1.74017	1.67665
BnaC07g08430D	0	0	0	0	2.61465	2.93178	0	0	0	2.54279	3.1313
BnaC07g14830D	0	0	0	0	1.81292	0	0	0	0	1.51303	1.79958
BnaC07g17400D	0	0	0	0	1.49678	1.67085	0	0	0	0	1.44511
BnaC07g21450D	0	0	0	0	0	1.96129	0	0	0	1.83458	2.01206
BnaC07g21510D	0	0	0	0	0	1.60809	0	0	0	2.20823	0
BnaC07g21980D	0	0	0	0	0	1.35448	0	0	0	0	1.54942
BnaC07g22090D	0	0	0	0	1.97585	2.78126	0	0	0	1.69742	2.53448
BnaC07g23090D	0	0	0	0	0	1.50534	0	0	0	0	1.58372
BnaC07g24080D	0	0	0	0	1.94814	2.75675	0	0	0	1.83964	2.4888
BnaC07g25020D	0	0	0	0	1.7649	1.1842	0	0	0	2.11699	2.08462
BnaC07g30390D	0	0	0	0	1.30277	1.31059	0	0	0	0	1.6096
BnaC07g35070D	0	0	0	0	1.37781	2.08671	0	0	0	0	1.56097
BnaC07g40160D	0	0	0	0	0	1.80879	1.66363	0	0	0	2.02928
BnaC07g41150D	0	0	0	0	0	2.32186	0	0	0	2.65705	3.28125
BnaC07g42640D	0	0	0	0	1.58323	1.24397	0	0	0	1.87323	2.23532
BnaC07g43490D	0	0	0	0	2.58761	1.73864	0	0	0	2.71996	2.73957
BnaC07g44740D	0	0	0	0	1.50143	1.45727	0	0	0	0	1.4737
BnaC07g45620D	0	0	0	0	0	1.57919	0	0	0	0	1.79111
BnaC07g45900D	0	0	0	0	3.10012	3.88815	0	0	0	3.24211	3.85794
BnaC07g47260D	0	0	0	0	0	2.10201	0	0	0	2.20334	0
BnaC07g48760D	0	0	0	0	1.84668	0	0	0	0	2.02934	2.05861
BnaC07g49810D	0	0	0	0	0	2.99546	0	0	0	2.63586	2.5321
BnaC08g01080D	0	0	0	0	0	2.5777	0	0	0	1.99266	2.20014
BnaC08g01920D	0	0	0	0	0	1.46408	0	0	0	0	1.34041
BnaC08g03520D	0	0	0	0	0	7.04537	0	0	0	0	6.89518
BnaC08g07580D	0	0	0	0	2.18867	2.02286	0	0	0	2.14805	1.92125
BnaC08g08210D	0	0	0	0	2.07101	3.32737	0	0	0	2.86174	0
BnaC08g13980D	0	0	0	0	1.95662	2.80359	0	0	0	1.79563	2.6451
BnaC08g17460D	0	0	0	0	1.40399	1.28066	0	0	0	1.37771	1.54557
BnaC08g18580D	0	0	0	0	0	3.26987	0	0	0	3.07946	3.40614
BnaC08g18640D	0	0	0	0	0	1.66319	0	0	0	0	2.09437
BnaC08g19730D	0	0	0	0	2.06247	1.92105	0	0	0	2.15156	2.79929
BnaC08g20810D	0	0	0	0	0	1.09545	0	0	0	1.92459	0
BnaC08g20840D	0	0	0	0	0	3.70709	0	0	0	0	5.44681
BnaC08g21160D	0	0	0	0	1.57907	1.5093	0	0	0	1.66247	1.54208
BnaC08g21320D	0	0	0	0	1.68501	2.22656	0	0	0	1.81612	0
BnaC08g22640D	0	0	0	0	0	1.06081	0	0	0	1.50009	0
BnaC08g22920D	0	0	0	0	1.30731	2.48189	0	0	0	1.77638	0
BnaC08g25010D	0	0	0	0	2.255	2.30578	0	0	0	1.84674	1.84512
BnaC08g25500D	0	0	0	0	0	2.26222	0	0	0	0	1.80857
BnaC08g26190D	0	0	0	0	0	1.46802	0	0	0	0	1.52667
BnaC08g26910D	0	0	0	0	2.04794	0	0	0	0	1.96818	0
BnaC08g32370D	0	0	0	0	0	2.2872	0	0	0	2.06582	1.99112
BnaC08g35020D	0	0	0	0	1.23129	0	0	0	0	1.50674	1.39402
BnaC08g41730D	0	0	0	0	0	1.6211	0	0	0	1.76964	1.75631
BnaC08g41800D	0	0	0	0	0	1.85313	0	0	0	1.48861	0
BnaC08g42830D	0	0	0	0	1.73787	2.16092	0	0	0	1.97776	2.27795
BnaC08g45980D	0	0	0	0	0	2.0022	0	0	0	0	2.84321
BnaC08g46010D	0	0	0	0	0	1.53989	0	0	0	0	1.42136
BnaC08g46130D	0	0	0	0	0	1.6226	0	0	0	1.65869	0
BnaC08g46150D	0	0	0	0	0	2.21963	0	0	2.41498	0	2.17566
BnaC08g46740D	0	0	0	0	1.78325	2.58796	0	0	0	2.03399	2.466
BnaC08g48340D	0	0	0	0	2.17908	1.63565	0	0	0	2.13187	1.90592
BnaC08g49480D	0	0	0	2.25238	1.84545	0	0	0	0	1.82322	2.39903
BnaC09g00100D	0	0	0	0	0	6.55908	0	0	0	5.97675	0
BnaC09g04640D	0	0	0	0	0	1.47497	0	0	0	0	1.55468
BnaC09g06860D	0	0	0	0	3.57329	3.43662	0	0	0	3.73866	3.77385
BnaC09g10360D	0	0	0	0	0	1.72689	0	0	0	0	1.90498
BnaC09g11080D	0	0	0	0	0	3.56819	0	0	0	2.37	0
BnaC09g11350D	0	0	0	0	2.07687	2.56334	0	0	0	1.84585	2.1233
BnaC09g16820D	0	0	0	0	2.85443	2.87845	0	0	0	3.51056	0
BnaC09g24050D	0	0	0	2.25597	2.19988	0	0	0	2.20065	1.69252	1.80809
BnaC09g26890D	0	0	0	0	2.40553	2.84267	0	0	0	2.51605	3.2719
BnaC09g27860D	0	0	0	0	0	2.01885	0	0	0	0	2.40642
BnaC09g28100D	0	0	0	0	0	2.04829	0	0	0	2.14592	0
BnaC09g29270D	0	0	0	0	0	3.15869	0	0	0	2.3382	3.07781
BnaC09g30100D	0	0	0	0	2.90138	3.36412	0	0	0	2.98993	3.56383
BnaC09g30110D	0	0	0	0	3.13436	3.93731	0	0	2.95272	3.43372	0
BnaC09g30620D	0	0	0	0	0	1.18992	0	0	0	0	1.69429
BnaC09g33860D	0	0	0	0	0	1.6446	0	0	0	0	1.56894
BnaC09g35160D	0	0	0	0	2.38379	2.12503	0	0	0	2.64724	2.43944
BnaC09g36590D	0	0	0	0	1.92001	2.75029	0	0	0	1.69538	2.46177
BnaC09g37120D	0	0	0	0	0	2.24484	0	0	0	2.13058	0
BnaC09g39170D	0	0	0	0	0	1.56097	0	0	0	0	1.53761
BnaC09g40550D	0	0	0	0	0	2.60053	0	0	0	2.32938	2.82864
BnaC09g40960D	0	0	0	0	1.56759	1.70615	0	0	0	1.61857	2.36105
BnaC09g43990D	0	0	0	0	0	1.58839	0	0	0	0	2.06161
BnaC09g44950D	0	0	0	0	1.20866	1.31989	0	0	0	0	1.58774
BnaC09g45790D	0	0	0	0	1.60823	2.0931	0	0	0	0	1.60705
BnaC09g48200D	0	0	0	0	0	1.88054	0	0	0	1.5303	0
BnaC09g49920D	0	0	0	0	0	1.3448	0	0	0	1.89264	0
BnaC09g50050D	0	0	0	0	0	1.38246	0	0	0	1.83026	0
BnaC09g51620D	0	0	0	0	0	1.03289	0	0	0	1.66188	0
BnaCnng00770D	0	0	0	0	0	3.0431	0	0	0	0	2.64279
BnaCnng01200D	0	0	0	0	0	2.14998	0	0	0	1.84219	2.14146
BnaCnng01480D	0	0	0	0	0	1.51368	0	0	0	0	1.71699
BnaCnng02170D	0	0	0	0	1.14464	1.69775	0	0	0	1.38712	1.71977
BnaCnng02420D	0	0	0	0	0	3.76788	0	0	0	0	3.66038
BnaCnng05510D	0	0	0	0	1.82102	0	0	0	0	1.88271	1.71651
BnaCnng06220D	0	0	0	0	0	2.92936	0	0	0	2.54727	2.61215
BnaCnng06770D	0	0	0	0	0	1.55913	0	0	0	1.97465	0
BnaCnng08620D	0	0	0	0	0	2.22121	0	0	0	2.30251	0
BnaCnng08770D	0	0	0	0	0	2.01062	0	0	0	1.30483	0
BnaCnng12640D	0	0	0	0	2.54488	4.6041	0	0	2.39575	2.47925	3.09889
BnaCnng12720D	0	0	0	0	0	4.36814	0	0	0	0	3.30631
BnaCnng13990D	0	0	0	0	0	1.97956	0	0	0	1.76791	1.89275
BnaCnng19560D	0	0	0	0	0	2.19677	0	0	0	0	2.11153
BnaCnng20740D	0	0	0	0	0	2.76251	0	0	0	2.66772	3.11453
BnaCnng22570D	0	0	0	0	1.1591	1.86404	0	0	0	0	1.92247
BnaCnng27960D	0	0	0	0	1.80382	0	0	0	0	0	1.88627
BnaCnng29300D	0	0	0	0	1.69631	2.60682	0	0	0	1.68611	2.53639
BnaCnng30830D	0	0	0	0	1.71268	1.92274	0	0	0	1.67407	2.04576
BnaCnng36540D	0	0	0	0	0	1.67752	0	0	0	0	1.57671
BnaCnng37990D	0	0	0	0	0	2.0539	0	0	0	0	2.37373
BnaCnng39320D	0	0	0	0	1.55204	2.52818	0	0	0	2.28393	2.38452
BnaCnng41520D	0	0	0	0	1.26487	0	0	0	0	1.43647	0
BnaCnng42530D	0	0	0	0	0	2.26391	0	0	0	0	3.171
BnaCnng47130D	0	0	0	0	2.11291	2.47065	0	0	0	1.89375	1.62692
BnaCnng57640D	0	0	0	0	0	6.40064	0	0	0	5.816	0
BnaCnng58090D	0	0	0	0	1.87215	2.33509	0	0	0	1.83343	1.7321
BnaCnng62150D	0	0	0	0	0	1.80345	0	0	0	1.52569	1.45663
BnaCnng64010D	0	0	0	0	1.65335	0	0	0	0	0	1.61891
BnaCnng70940D	0	0	0	0	2.15048	2.79967	0	0	0	2.10398	3.11828
BnaCnng71320D	0	0	0	0	1.32426	0	0	0	0	1.43509	1.65441
BnaCnng72960D	0	0	0	0	1.91762	1.54936	0	0	0	1.74042	1.7472
BnaCnng73290D	0	0	0	0	1.93718	2.32158	0	0	0	1.98676	0
BnaUnng00020D	0	0	0	0	1.70658	1.91596	0	0	0	1.79775	1.99707

## Sheet: down-regulated PI
Bna_gene_id	UP	PILFD2	PILFD5	PILFD10	PILFD20	PILFD30
BnaC07g36770D	0	0	0	0	0	-4.14231
BnaC07g22770D	0	0	0	0	0	-3.86894
BnaA07g24460D	0	0	0	0	0	-3.85654
BnaA09g33610D	0	0	0	0	0	-3.84634
BnaC06g06610D	0	0	0	0	0	-3.70183
BnaC05g15230D	0	0	0	0	0	-3.60099
BnaC01g01500D	0	0	0	0	0	-3.49399
BnaA07g24790D	0	0	0	0	0	-3.49249
BnaA06g23270D	0	0	0	0	0	-3.4494
BnaAnng37680D	0	0	0	0	0	-3.43913
BnaA08g04980D	0	0	0	0	0	-3.35696
BnaA03g11840D	0	0	0	0	0	-3.2748
BnaA03g51820D	0	0	0	0	0	-3.12708
BnaC05g34410D	0	0	0	0	0	-3.10065
BnaA04g16920D	0	0	0	0	0	-3.04152
BnaA01g37010D	0	0	0	0	0	-3.03085
BnaA05g18690D	0	0	0	0	0	-3.01264
BnaC05g49600D	0	0	0	0	0	-3.01096
BnaA10g01510D	0	0	0	0	0	-2.98732
BnaC05g46390D	0	0	0	0	0	-2.97781
BnaC04g05720D	0	0	0	0	0	-2.96614
BnaA05g00610D	0	0	0	0	0	-2.89761
BnaA08g21960D	0	0	0	0	0	-2.86585
BnaA07g11930D	0	0	0	0	-1.84275	-2.86545
BnaAnng13950D	0	0	0	0	0	-2.85287
BnaCnng45670D	0	0	0	0	0	-2.81158
BnaA10g12540D	0	0	0	0	0	-2.80815
BnaC01g14580D	0	0	0	0	0	-2.80223
BnaC01g03470D	0	0	0	0	0	-2.80202
BnaC02g42140D	0	0	0	0	0	-2.77137
BnaC06g30920D	0	0	0	0	0	-2.76081
BnaC08g28170D	0	0	0	0	0	-2.74316
BnaA09g05570D	0	0	0	0	0	-2.7304
BnaA01g00690D	0	0	0	0	0	-2.69199
BnaA04g16160D	0	0	0	0	0	-2.68999
BnaC02g39370D	0	0	0	0	0	-2.68209
BnaA08g13200D	0	0	0	0	0	-2.67827
BnaAnng27140D	0	0	0	0	0	-2.67636
BnaA08g26110D	0	0	0	0	0	-2.65248
BnaC03g59010D	0	0	0	0	0	-2.65038
BnaC07g15280D	0	0	0	0	0	-2.60373
BnaA06g31250D	0	0	0	0	0	-2.58947
BnaCnng62690D	0	0	0	0	0	-2.57434
BnaC04g52190D	0	0	0	0	0	-2.52855
BnaA01g34970D	0	0	0	0	-1.18589	-2.52111
BnaC07g25390D	0	0	0	0	0	-2.51238
BnaC07g18940D	0	0	0	0	0	-2.50674
BnaC01g11750D	0	0	0	0	0	-2.50246
BnaA09g28990D	0	0	0	0	-1.32351	-2.48321
BnaC04g44870D	0	0	0	0	0	-2.4423
BnaA04g27870D	0	0	0	0	0	-2.44105
BnaA09g47290D	0	0	0	0	0	-2.43816
BnaA04g20380D	0	0	0	0	0	-2.42717
BnaA01g26430D	0	0	0	0	0	-2.38425
BnaC07g35800D	0	0	0	0	0	-2.36465
BnaC09g46170D	0	0	0	0	0	-2.3316
BnaC03g65700D	0	0	0	0	0	-2.31417
BnaC02g11560D	0	0	0	0	0	-2.3092
BnaC01g08910D	0	0	0	0	0	-2.30829
BnaA09g30120D	0	0	0	0	0	-2.23442
BnaC03g78090D	0	0	0	0	0	-2.21263
BnaC08g26410D	0	0	0	0	0	-2.2075
BnaAnng09460D	0	0	0	0	0	-2.19418
BnaCnng61850D	0	0	0	0	0	-2.1776
BnaA08g04950D	0	0	0	0	0	-2.17281
BnaC02g18120D	0	0	0	0	0	-2.16659
BnaA06g14510D	0	0	0	0	0	-2.164
BnaA01g37200D	0	0	0	0	0	-2.14753
BnaC07g36640D	0	0	0	0	0	-2.1418
BnaAnng01940D	0	0	0	0	0	-2.14132
BnaA03g10230D	0	0	0	0	0	-2.1037
BnaC07g48400D	0	0	0	0	0	-2.09762
BnaA05g19720D	0	0	0	0	0	-2.06745
BnaA08g05350D	0	0	0	0	0	-2.04704
BnaA06g22560D	0	0	0	0	0	-2.0408
BnaCnng68450D	0	0	0	0	0	-2.03967
BnaC04g56200D	0	0	0	0	0	-2.03843
BnaA03g45520D	0	0	0	0	0	-2.02674
BnaC03g61940D	0	0	0	0	0	-2.02242
BnaC02g16350D	0	0	0	0	0	-2.0139
BnaA08g21920D	0	0	0	0	0	-2.00993
BnaA05g03750D	0	0	0	0	0	-1.99348
BnaC01g41150D	0	0	0	0	0	-1.98154
BnaC09g48680D	0	0	0	0	0	-1.9563
BnaC08g18330D	0	0	0	0	0	-1.94681
BnaA02g08160D	0	0	0	0	0	-1.9323
BnaC03g14930D	0	0	0	0	0	-1.92935
BnaC08g47390D	0	0	0	0	0	-1.89821
BnaC04g05470D	0	0	0	0	0	-1.88988
BnaC08g31950D	0	0	0	0	0	-1.88132
BnaC05g34400D	0	0	0	0	0	-1.85998
BnaA05g26420D	0	0	0	0	0	-1.85721
BnaC03g14450D	0	0	0	0	0	-1.85577
BnaA10g24060D	0	0	0	0	0	-1.85062
BnaC09g32850D	0	0	0	0	0	-1.83459
BnaC06g17690D	0	0	0	0	0	-1.83229
BnaA01g00670D	0	0	0	0	0	-1.81838
BnaA10g00970D	0	0	0	0	0	-1.80566
BnaA10g05120D	0	0	0	0	0	-1.79827
BnaA03g48600D	0	0	0	0	0	-1.78345
BnaC08g11780D	0	0	0	0	0	-1.782
BnaA05g23260D	0	0	0	0	0	-1.74784
BnaA08g04230D	0	0	0	0	0	-1.74771
BnaA01g35000D	0	0	0	0	0	-1.74357
BnaC08g39110D	0	0	0	0	0	-1.73868
BnaC02g23440D	0	0	0	0	0	-1.73726
BnaA07g07560D	0	0	0	0	0	-1.73111
BnaA09g05360D	0	0	0	0	0	-1.72436
BnaA06g02010D	0	0	0	0	0	-1.72351
BnaA08g31150D	0	0	0	0	0	-1.71728
BnaA05g01480D	0	0	0	0	0	-1.71551
BnaA03g28510D	0	0	0	0	0	-1.70953
BnaC06g21530D	0	0	0	0	0	-1.70949
BnaA01g37180D	0	0	0	0	0	-1.6936
BnaA10g30410D	0	0	0	0	0	-1.69136
BnaA01g30340D	0	0	0	0	0	-1.68752
BnaA06g28320D	0	0	0	0	0	-1.68146
BnaA10g14220D	0	0	0	0	0	-1.67935
BnaA07g28200D	0	0	0	0	0	-1.67484
BnaA05g24200D	0	0	0	0	0	-1.65201
BnaCnng21080D	0	0	0	0	0	-1.65056
BnaA05g06090D	0	0	0	0	0	-1.64731
BnaC06g15910D	0	0	0	0	0	-1.64225
BnaC05g30560D	0	0	0	0	0	-1.62804
BnaC04g06690D	0	0	0	0	0	-1.61993
BnaA10g05030D	0	0	0	0	0	-1.61311
BnaC08g42910D	0	0	0	0	0	-1.60276
BnaA06g40430D	0	0	0	0	0	-1.60243
BnaC04g51910D	0	0	0	0	0	-1.59967
BnaA03g45390D	0	0	0	0	0	-1.5976
BnaA08g25410D	0	0	0	0	0	-1.59648
BnaC08g32290D	0	0	0	0	0	-1.58184
BnaC07g29570D	0	0	0	0	0	-1.57742
BnaC06g24400D	0	0	0	0	0	-1.56927
BnaA04g12570D	0	0	0	0	0	-1.56756
BnaA02g06580D	0	0	0	0	0	-1.56646
BnaC03g34980D	0	0	0	0	0	-1.55456
BnaA01g36880D	0	0	0	0	0	-1.52534
BnaC07g15170D	0	0	0	0	0	-1.51187
BnaC06g29080D	0	0	0	0	0	-1.5041
BnaC02g13790D	0	0	0	0	0	-1.50125
BnaC08g15380D	0	0	0	0	0	-1.4997
BnaA03g53100D	0	0	0	0	0	-1.49733
BnaC09g13080D	0	0	0	0	0	-1.48904
BnaA02g05540D	0	0	0	0	0	-1.46669
BnaC06g16270D	0	0	0	0	0	-1.46407
BnaA08g29500D	0	0	0	0	0	-1.45421
BnaC09g41090D	0	0	0	0	0	-1.44846
BnaA05g33740D	0	0	0	0	0	-1.43908
BnaC03g75690D	0	0	0	0	0	-1.43271
BnaC05g47610D	0	0	0	0	0	-1.42728
BnaA02g01650D	0	0	0	0	0	-1.42266
BnaA07g02730D	0	0	0	0	0	-1.42176
BnaA10g23380D	0	0	0	0	0	-1.42103
BnaA05g33180D	0	0	0	0	0	-1.41858
BnaA09g22890D	0	0	0	0	0	-1.41853
BnaC03g22680D	0	0	0	0	0	-1.40978
BnaC01g32800D	0	0	0	0	0	-1.40898
BnaA04g18330D	0	0	0	0	0	-1.40848
BnaA06g39210D	0	0	0	0	0	-1.40782
BnaAnng21020D	0	0	0	0	0	-1.39455
BnaA05g27100D	0	0	0	0	0	-1.39283
BnaAnng06240D	0	0	0	0	0	-1.39173
BnaA09g12410D	0	0	0	0	0	-1.3866
BnaA01g34730D	0	0	0	0	0	-1.38552
BnaC01g38150D	0	0	0	0	0	-1.37315
BnaA08g28590D	0	0	0	0	0	-1.37026
BnaAnng19200D	0	0	0	0	0	-1.36992
BnaA08g15260D	0	0	0	0	0	-1.35736
BnaA05g12950D	0	0	0	0	0	-1.3564
BnaA06g11890D	0	0	0	0	0	-1.35216
BnaC08g48530D	0	0	0	0	0	-1.344
BnaC09g15370D	0	0	0	0	0	-1.33747
BnaCnng76220D	0	0	0	0	0	-1.33727
BnaC08g15340D	0	0	0	0	0	-1.33602
BnaC05g44310D	0	0	0	0	0	-1.33269
BnaA09g07690D	0	0	0	0	0	-1.33121
BnaC04g10770D	0	0	0	0	0	-1.32474
BnaA07g28390D	0	0	0	0	0	-1.32435
BnaA07g16710D	0	0	0	0	0	-1.3241
BnaC07g30960D	0	0	0	0	0	-1.31761
BnaA09g25030D	0	0	0	0	0	-1.31201
BnaCnng45710D	0	0	0	0	0	-1.31199
BnaA07g01210D	0	0	0	0	0	-1.31186
BnaC02g35940D	0	0	0	0	0	-1.30639
BnaA08g21600D	0	0	0	0	0	-1.28668
BnaC09g41840D	0	0	0	0	0	-1.28362
BnaA06g21680D	0	0	0	0	0	-1.28267
BnaA08g16180D	0	0	0	0	0	-1.28066
BnaCnng55470D	0	0	0	0	0	-1.27826
BnaC01g11650D	0	0	0	0	0	-1.27694
BnaA05g04350D	0	0	0	0	0	-1.27552
BnaA07g38790D	0	0	0	0	0	-1.27434
BnaA04g24360D	0	0	0	0	0	-1.27362
BnaC03g19000D	0	0	0	0	0	-1.25572
BnaC08g22930D	0	0	0	0	0	-1.25088
BnaAnng10570D	0	0	0	0	0	-1.24851
BnaC08g05450D	0	0	0	0	0	-1.248
BnaC03g71040D	0	0	0	0	0	-1.24006
BnaC06g22380D	0	0	0	0	0	-1.23795
BnaC02g48740D	0	0	0	0	0	-1.23289
BnaA03g25790D	0	0	0	0	0	-1.23225
BnaC01g22400D	0	0	0	0	0	-1.23187
BnaCnng04610D	0	0	0	0	0	-1.231
BnaC04g28400D	0	0	0	0	0	-1.2273
BnaC07g47240D	0	0	0	0	0	-1.226
BnaC05g03040D	0	0	0	0	0	-1.22574
BnaA03g06030D	0	0	0	0	0	-1.22322
BnaC06g30180D	0	0	0	0	0	-1.22102
BnaC07g35270D	0	0	0	0	0	-1.21539
BnaC03g25140D	0	0	0	0	0	-1.21462
BnaA01g36300D	0	0	0	0	0	-1.21104
BnaC04g23100D	0	0	0	0	0	-1.20657
BnaC09g00690D	0	0	0	0	0	-1.18272
BnaC06g37990D	0	0	0	0	0	-1.18204
BnaA04g05380D	0	0	0	0	0	-1.18102
BnaA07g32310D	0	0	0	0	0	-1.17873
BnaC07g41980D	0	0	0	0	0	-1.16626
BnaA10g24080D	0	0	0	0	0	-1.15582
BnaA07g20280D	0	0	0	0	0	-1.15304
BnaC03g72370D	0	0	0	0	0	-1.14927
BnaA01g34740D	0	0	0	0	0	-1.14822
BnaA01g02060D	0	0	0	0	0	-1.14465
BnaC03g52570D	0	0	0	0	0	-1.14357
BnaC08g20880D	0	0	0	0	0	-1.14059
BnaA01g08410D	0	0	0	0	0	-1.13741
BnaA09g07820D	0	0	0	0	0	-1.13356
BnaA02g14850D	0	0	0	0	0	-1.13004
BnaA05g25030D	0	0	0	0	0	-1.12562
BnaAnng33720D	0	0	0	0	0	-1.12561
BnaA08g25730D	0	0	0	0	0	-1.12203
BnaC03g59440D	0	0	0	0	0	-1.12029
BnaA03g48610D	0	0	0	0	0	-1.1192
BnaC02g05940D	0	0	0	0	0	-1.11355
BnaAnng40400D	0	0	0	0	0	-1.11286
BnaA09g07170D	0	0	0	0	0	-1.1126
BnaC04g09850D	0	0	0	0	0	-1.10496
BnaC03g60710D	0	0	0	0	0	-1.10378
BnaA09g45540D	0	0	0	0	0	-1.08536
BnaC05g15170D	0	0	0	0	0	-1.08489
BnaA02g32550D	0	0	0	0	0	-1.08237
BnaA07g19460D	0	0	0	0	0	-1.07607
BnaC03g70570D	0	0	0	0	0	-1.07555
BnaCnng63870D	0	0	0	0	0	-1.0704
BnaA09g44980D	0	0	0	0	0	-1.06824
BnaA04g20060D	0	0	0	0	0	-1.06724
BnaA10g24600D	0	0	0	0	0	-1.06444
BnaA07g10140D	0	0	0	0	0	-1.06221
BnaA01g03040D	0	0	0	0	0	-1.05638
BnaC08g20070D	0	0	0	0	0	-1.05499
BnaA08g05990D	0	0	0	0	0	-1.05344
BnaA02g13050D	0	0	0	0	0	-1.04457
BnaC09g45450D	0	0	0	0	0	-1.035
BnaA04g01110D	0	0	0	0	0	-1.03495
BnaC03g65070D	0	0	0	0	0	-1.03067
BnaC03g39300D	0	0	0	0	0	-1.02749
BnaA03g15800D	0	0	0	0	0	-1.02289
BnaA02g19320D	0	0	0	0	0	-1.01451
BnaC07g37780D	0	0	0	0	0	-1.00647
BnaC07g27160D	0	-3.88239	0	0	-1.8856	-6.15886
BnaA03g36400D	0	0	0	0	0	-4.93784
BnaCnng67130D	0	0	0	0	0	-4.70653
BnaA02g12290D	0	0	0	0	-1.45481	-4.59236
BnaA03g13530D	0	0	0	0	0	-4.54144
BnaC05g09040D	0	0	0	0	0	-4.51996
BnaA08g01090D	0	0	0	0	0	-4.46099
BnaC07g09260D	0	0	0	0	0	-4.43548
BnaC04g45080D	0	0	0	0	0	-4.37976
BnaAnng00920D	0	0	0	0	0	-4.36243
BnaC07g45370D	0	0	0	0	-1.72783	-4.29506
BnaC03g53210D	0	0	0	0	0	-4.27887
BnaC04g40570D	0	0	0	0	0	-4.26519
BnaC09g03730D	0	0	0	0	0	-4.26409
BnaC02g02350D	0	-1.6829	-1.62806	0	0	-4.17507
BnaC04g14070D	0	0	0	0	-1.65382	-4.17058
BnaA05g23460D	0	0	0	0	0	-4.16067
BnaC02g35830D	0	0	0	0	-2.02654	-4.1384
BnaC06g33610D	0	0	0	0	0	-4.11652
BnaAnng30540D	0	0	0	0	0	-4.10798
BnaA10g16150D	0	0	0	0	0	-4.05496
BnaCnng22400D	0	0	0	0	0	-4.00297
BnaCnng32820D	0	0	0	0	0	-4.00293
BnaCnng69510D	0	0	0	0	0	-3.97936
BnaC03g16550D	0	0	0	0	0	-3.96334
BnaC03g07600D	0	0	0	0	0	-3.95811
BnaA02g25520D	0	0	0	0	0	-3.95435
BnaC03g10330D	0	0	0	0	0	-3.9361
BnaCnng39650D	0	0	0	0	0	-3.91284
BnaA03g26220D	0	0	0	0	0	-3.90602
BnaA06g39330D	0	0	0	0	0	-3.9032
BnaA07g27980D	0	0	0	0	0	-3.86622
BnaA01g09070D	0	0	0	0	0	-3.83732
BnaA06g34490D	0	0	0	0	0	-3.80446
BnaA06g13800D	0	0	0	0	0	-3.79945
BnaA05g12630D	0	0	0	0	-1.38347	-3.79678
BnaA09g32060D	0	0	0	0	0	-3.75085
BnaC09g41590D	0	0	0	0	0	-3.72296
BnaA03g60000D	0	0	0	0	0	-3.71073
BnaC01g41400D	0	0	0	0	0	-3.65479
BnaC02g31120D	0	0	0	0	0	-3.64637
BnaA03g10550D	0	0	0	0	0	-3.64609
BnaA05g33720D	0	0	0	0	0	-3.63898
BnaA10g04260D	0	0	0	0	0	-3.63851
BnaC04g16100D	0	0	0	0	-2.07081	-3.61235
BnaA06g27030D	0	0	0	0	0	-3.59613
BnaC06g05340D	0	0	0	0	0	-3.5722
BnaA07g05630D	0	0	0	0	0	-3.56156
BnaA09g06120D	0	0	0	0	0	-3.5595
BnaC07g34230D	0	0	0	0	0	-3.55268
BnaC03g23610D	0	0	0	0	0	-3.50407
BnaA09g29600D	0	0	0	0	0	-3.50227
BnaA07g16680D	0	0	0	0	0	-3.48714
BnaA03g31560D	0	0	0	0	0	-3.4757
BnaC03g61910D	0	0	0	0	0	-3.47526
BnaCnng09400D	0	0	0	0	0	-3.46982
BnaC02g42740D	0	0	0	0	0	-3.46523
BnaC02g37180D	0	0	0	0	0	-3.45294
BnaC08g05020D	0	0	0	0	0	-3.4525
BnaA05g02270D	0	0	0	0	0	-3.45249
BnaC04g40860D	0	0	0	0	0	-3.451
BnaC09g51580D	0	0	0	0	0	-3.44933
BnaC09g17280D	0	0	0	0	0	-3.44091
BnaC04g53030D	0	0	0	0	0	-3.43882
BnaA05g33710D	0	0	0	0	0	-3.42644
BnaA10g18090D	0	0	0	0	0	-3.42635
BnaC07g13200D	0	0	0	0	0	-3.42527
BnaC09g04900D	0	0	0	0	0	-3.40804
BnaA03g26210D	0	0	0	0	0	-3.38361
BnaA09g41470D	0	0	0	0	0	-3.37411
BnaAnng28010D	0	0	0	0	0	-3.37359
BnaA09g52740D	0	0	0	0	0	-3.37249
BnaA04g24790D	0	0	0	0	0	-3.37079
BnaAnng37050D	0	0	0	0	0	-3.36674
BnaA06g33810D	0	0	0	0	0	-3.3516
BnaA07g21130D	0	0	0	0	0	-3.35073
BnaAnng15440D	0	0	0	0	0	-3.33774
BnaC05g41910D	0	0	0	0	0	-3.32942
BnaA04g16150D	0	0	0	0	0	-3.31928
BnaA05g06600D	0	0	0	0	0	-3.31647
BnaAnng09400D	0	0	0	0	0	-3.316
BnaA01g08860D	0	0	0	0	0	-3.28815
BnaC03g14480D	0	0	0	0	0	-3.27119
BnaA03g38750D	0	0	0	0	-1.27023	-3.26273
BnaC03g13250D	0	0	0	0	0	-3.25928
BnaA04g19070D	0	0	0	0	0	-3.24477
BnaA06g16720D	0	0	0	0	0	-3.24133
BnaA10g25110D	0	0	0	0	0	-3.23691
BnaC05g01280D	0	0	0	0	0	-3.22893
BnaC09g06840D	0	0	0	0	0	-3.21623
BnaA06g26060D	0	0	0	0	0	-3.2051
BnaC02g24720D	0	0	0	0	0	-3.19206
BnaAnng31610D	0	0	0	0	0	-3.1663
BnaA10g14840D	0	0	0	0	0	-3.16622
BnaCnng66150D	0	0	0	0	0	-3.13425
BnaC01g10530D	0	0	0	0	-1.04946	-3.13421
BnaA05g00740D	0	0	0	0	0	-3.13086
BnaA03g43530D	0	0	0	0	0	-3.12473
BnaC09g15860D	0	0	0	0	0	-3.10442
BnaC02g14020D	0	0	0	0	0	-3.09602
BnaA08g17480D	0	0	0	0	0	-3.09029
BnaA04g19140D	0	0	0	0	0	-3.08639
BnaC05g13140D	0	0	0	0	0	-3.08247
BnaA01g26600D	0	0	0	0	0	-3.07483
BnaA02g34850D	0	0	0	0	0	-3.07386
BnaC04g45640D	0	0	0	0	0	-3.06665
BnaC03g54440D	0	0	0	0	0	-3.06551
BnaA04g02500D	0	0	0	0	0	-3.0635
BnaC01g03450D	0	0	0	0	0	-3.05701
BnaC03g38830D	0	0	0	0	0	-3.04441
BnaA06g03530D	0	0	0	0	0	-3.03026
BnaA10g25070D	0	0	0	0	0	-3.02669
BnaC01g34040D	0	0	0	0	0	-3.02265
BnaC04g24330D	0	0	0	0	0	-3.01323
BnaC05g23720D	0	0	0	0	0	-3.00301
BnaC04g51100D	0	0	0	0	0	-3.00019
BnaC03g14570D	0	0	0	0	-2.46551	-2.98833
BnaC04g06190D	0	0	0	0	0	-2.98146
BnaA01g10000D	0	0	0	0	0	-2.97557
BnaC08g23920D	0	0	0	0	0	-2.97373
BnaA01g09840D	0	0	0	0	0	-2.97073
BnaC02g33320D	0	0	0	0	0	-2.96803
BnaC05g23580D	0	0	0	0	0	-2.95949
BnaA09g36610D	0	0	0	0	0	-2.94312
BnaC06g25520D	0	0	0	0	0	-2.94113
BnaC01g37470D	0	0	0	0	0	-2.93899
BnaA07g24470D	0	0	0	0	0	-2.93454
BnaC07g28970D	0	0	0	0	0	-2.93061
BnaC01g06770D	0	0	0	0	0	-2.92727
BnaA04g23480D	0	0	0	0	0	-2.91788
BnaA10g30260D	0	0	0	0	0	-2.91631
BnaA09g03180D	0	0	0	0	0	-2.90924
BnaA10g28150D	0	0	0	0	0	-2.89384
BnaA03g15250D	0	0	0	0	0	-2.88513
BnaC04g35020D	0	0	0	0	0	-2.88187
BnaA02g21780D	0	0	0	0	0	-2.87956
BnaA07g11430D	0	0	0	0	0	-2.86297
BnaC09g04450D	0	0	0	0	0	-2.86011
BnaC07g30860D	0	0	0	0	0	-2.84505
BnaAnng11630D	0	0	0	0	0	-2.84251
BnaC09g38990D	0	0	0	0	0	-2.83459
BnaA02g06160D	0	0	0	0	0	-2.83352
BnaA09g50420D	0	0	0	0	0	-2.83189
BnaCnng63980D	0	0	0	0	0	-2.82611
BnaC07g13290D	0	0	0	0	0	-2.82537
BnaA06g31210D	0	0	0	0	0	-2.82464
BnaC08g19610D	0	0	0	0	0	-2.81137
BnaA08g17860D	0	0	0	0	0	-2.80655
BnaAnng31190D	0	0	0	0	0	-2.80293
BnaC09g36390D	0	0	0	0	0	-2.79882
BnaC03g14650D	0	0	0	0	0	-2.79002
BnaA01g18970D	0	0	0	0	0	-2.78813
BnaA09g47380D	0	0	0	0	0	-2.77947
BnaC03g11160D	0	0	0	0	0	-2.7785
BnaAnng18440D	0	0	0	0	0	-2.77751
BnaA07g14610D	0	0	0	0	0	-2.77663
BnaC04g07940D	0	0	0	0	0	-2.77495
BnaAnng17710D	0	0	0	0	0	-2.77445
BnaAnng37410D	0	0	0	0	0	-2.7656
BnaC07g05770D	0	0	0	0	0	-2.75047
BnaC09g28950D	0	0	0	0	0	-2.75018
BnaA06g20760D	0	0	0	0	0	-2.74702
BnaA07g05760D	0	0	0	0	0	-2.74219
BnaC08g22710D	0	0	0	0	0	-2.74091
BnaC01g19760D	0	0	0	0	0	-2.73677
BnaA07g29770D	0	0	0	0	0	-2.73446
BnaAnng41580D	0	0	0	0	0	-2.73252
BnaCnng47940D	0	0	0	0	0	-2.72994
BnaC08g46530D	0	0	0	0	0	-2.72946
BnaC03g21960D	0	0	0	0	0	-2.72807
BnaC04g24310D	0	0	0	0	0	-2.72034
BnaC09g29910D	0	0	0	0	0	-2.71865
BnaA09g02390D	0	0	0	0	0	-2.71471
BnaC08g27340D	0	0	0	0	0	-2.70924
BnaA08g04430D	0	0	0	0	0	-2.6976
BnaC03g45610D	0	0	0	0	0	-2.69685
BnaA02g31040D	0	0	0	0	0	-2.69333
BnaC08g30910D	0	0	0	0	0	-2.6931
BnaA10g19750D	0	0	0	0	0	-2.68435
BnaCnng18850D	0	0	0	0	0	-2.68371
BnaC09g54190D	0	0	0	0	0	-2.68037
BnaA07g12500D	0	0	0	0	0	-2.67804
BnaC03g57220D	0	0	0	0	0	-2.66774
BnaC05g36730D	0	0	0	0	0	-2.66554
BnaC05g00400D	0	0	0	0	0	-2.65953
BnaA06g01630D	0	0	0	0	0	-2.65939
BnaC03g59400D	0	0	0	0	0	-2.6574
BnaC07g46940D	0	0	0	0	0	-2.65383
BnaA05g24300D	0	0	0	0	0	-2.6517
BnaA02g14340D	0	0	0	0	0	-2.64997
BnaA10g13620D	0	0	0	0	0	-2.64646
BnaA09g15230D	0	0	0	0	0	-2.64625
BnaC08g27790D	0	0	0	0	0	-2.64496
BnaA07g21770D	0	0	0	0	0	-2.64487
BnaA10g26770D	0	0	0	0	0	-2.63975
BnaA04g24080D	0	0	0	0	0	-2.63781
BnaA09g27890D	0	0	0	0	0	-2.63418
BnaC05g18450D	0	0	0	0	0	-2.62671
BnaA03g05860D	0	0	0	0	0	-2.62399
BnaC01g02210D	0	0	0	0	0	-2.62321
BnaC02g19350D	0	0	0	0	0	-2.61517
BnaA08g22070D	0	0	0	0	0	-2.61455
BnaC08g29430D	0	0	0	0	0	-2.60744
BnaA02g30470D	0	0	0	0	0	-2.60152
BnaC05g17280D	0	0	0	0	0	-2.59584
BnaCnng74900D	0	0	0	0	0	-2.5947
BnaC03g10320D	0	0	0	0	0	-2.59281
BnaC04g46160D	0	0	0	0	0	-2.59175
BnaA05g06110D	0	0	0	0	0	-2.59159
BnaC04g32750D	0	0	0	0	0	-2.58784
BnaA03g02990D	0	0	0	0	0	-2.58721
BnaC08g31390D	0	0	0	0	0	-2.58701
BnaA03g13580D	0	0	0	0	0	-2.58591
BnaC03g76920D	0	0	0	0	0	-2.58563
BnaA09g19920D	0	0	0	0	0	-2.58523
BnaC01g29930D	0	0	0	0	0	-2.57546
BnaC04g40260D	0	0	0	0	0	-2.57083
BnaC06g30900D	0	0	0	0	0	-2.57006
BnaAnng38380D	0	0	0	0	-1.49426	-2.5696
BnaC07g26580D	0	0	0	0	0	-2.56847
BnaC01g43680D	0	0	0	0	0	-2.565
BnaCnng59530D	0	0	0	0	0	-2.56284
BnaA02g18200D	0	0	0	0	0	-2.55673
BnaC06g04560D	0	0	0	0	0	-2.555
BnaA10g19220D	0	0	0	0	0	-2.5539
BnaC07g25440D	0	0	0	0	0	-2.54918
BnaA08g20470D	0	0	0	0	0	-2.54898
BnaC03g08490D	0	0	0	0	0	-2.54787
BnaC09g51520D	0	0	0	0	0	-2.5474
BnaA01g08870D	0	0	0	0	0	-2.547
BnaC06g25680D	0	0	0	0	0	-2.54586
BnaC08g06300D	0	0	0	0	0	-2.5435
BnaA08g18050D	0	0	0	0	0	-2.5426
BnaA08g15610D	0	0	0	0	-1.12028	-2.538
BnaC06g15450D	0	0	0	0	0	-2.53686
BnaCnng56000D	0	0	0	0	0	-2.53549
BnaA09g47970D	0	0	0	0	0	-2.53297
BnaA07g32480D	0	0	0	0	0	-2.52814
BnaC05g01780D	0	0	0	0	0	-2.52641
BnaA07g17500D	0	0	0	0	0	-2.52541
BnaA01g28120D	0	0	0	0	0	-2.52413
BnaA09g43600D	0	0	0	0	0	-2.5209
BnaCnng13230D	0	0	0	0	0	-2.5109
BnaC05g07750D	0	0	0	0	0	-2.50834
BnaC05g04490D	0	0	0	0	0	-2.50797
BnaC03g41930D	0	0	0	0	0	-2.50373
BnaC06g28780D	0	0	0	0	0	-2.50334
BnaC08g35500D	0	0	0	0	0	-2.50163
BnaC09g49790D	0	0	0	0	-1.56855	-2.50041
BnaA04g20350D	0	0	0	0	0	-2.49834
BnaC02g17670D	0	0	0	0	0	-2.49585
BnaA09g38980D	0	0	0	0	0	-2.49509
BnaCnng69070D	0	0	0	0	0	-2.4947
BnaA06g00690D	0	0	0	0	0	-2.48981
BnaA03g16830D	0	0	0	0	0	-2.48948
BnaC06g24360D	0	0	0	0	0	-2.48732
BnaA01g32740D	0	0	0	0	0	-2.48731
BnaA09g22870D	0	0	0	0	0	-2.48313
BnaA06g13410D	0	0	0	0	0	-2.47865
BnaA01g04650D	0	0	0	0	0	-2.47857
BnaC05g18410D	0	0	0	0	0	-2.47569
BnaAnng12450D	0	0	0	0	0	-2.47513
BnaA04g10950D	0	0	0	0	0	-2.47243
BnaA03g18480D	0	0	0	0	0	-2.47155
BnaC09g13580D	0	0	0	0	0	-2.47049
BnaA08g27570D	0	0	0	0	0	-2.46982
BnaA02g37060D	0	0	0	0	0	-2.46472
BnaA06g29700D	0	0	0	0	0	-2.44985
BnaA05g12290D	0	0	0	0	0	-2.44551
BnaA03g09610D	0	0	0	0	0	-2.44101
BnaA06g16330D	0	0	0	0	0	-2.4402
BnaCnng70190D	0	0	0	0	0	-2.43865
BnaA10g24150D	0	0	0	0	0	-2.43852
BnaC06g27960D	0	0	0	0	0	-2.43606
BnaA03g21360D	0	0	0	0	0	-2.43254
BnaC09g49010D	0	0	0	0	0	-2.43234
BnaC03g65520D	0	0	0	0	0	-2.43014
BnaC08g16330D	0	0	0	0	0	-2.42961
BnaC03g40240D	0	0	0	0	0	-2.42783
BnaC05g39800D	0	0	0	0	0	-2.42289
BnaA01g08240D	0	0	0	0	0	-2.41455
BnaC07g36810D	0	0	0	0	0	-2.40838
BnaA03g24600D	0	0	0	0	0	-2.4056
BnaC07g13600D	0	0	0	0	0	-2.40438
BnaC03g41300D	0	0	0	0	0	-2.39799
BnaC01g41850D	0	0	0	0	0	-2.39581
BnaC03g25090D	0	0	0	0	0	-2.39377
BnaA04g02490D	0	0	0	0	0	-2.38635
BnaC01g07980D	0	0	0	0	0	-2.38497
BnaA06g05820D	0	0	0	0	0	-2.37833
BnaA05g00450D	0	0	0	0	0	-2.37811
BnaA02g14990D	0	0	0	0	0	-2.37723
BnaC06g23590D	0	0	0	0	0	-2.37471
BnaA06g30140D	0	0	0	0	0	-2.36839
BnaC01g09950D	0	0	0	0	0	-2.36825
BnaA02g14330D	0	0	0	0	0	-2.36396
BnaC01g41230D	0	0	0	0	0	-2.36099
BnaC02g45050D	0	0	0	0	0	-2.35674
BnaA10g13530D	0	0	0	0	0	-2.3561
BnaA05g10730D	0	0	0	0	0	-2.35369
BnaA09g14690D	0	0	0	0	0	-2.35206
BnaC06g03760D	0	0	0	0	0	-2.34415
BnaC07g25530D	0	0	0	0	0	-2.34374
BnaC09g07240D	0	0	0	0	0	-2.34005
BnaA05g23300D	0	0	0	0	0	-2.3396
BnaC03g47950D	0	0	0	0	0	-2.33747
BnaA09g39130D	0	0	0	0	0	-2.33746
BnaA06g27970D	0	0	0	0	0	-2.33705
BnaA10g13630D	0	0	0	0	0	-2.33404
BnaA01g15110D	0	0	0	0	0	-2.33189
BnaC08g38370D	0	0	0	0	0	-2.32862
BnaA03g19150D	0	0	0	0	0	-2.32818
BnaAnng00290D	0	0	0	0	0	-2.32688
BnaC07g31070D	0	0	0	0	0	-2.32492
BnaC05g31680D	0	0	0	0	0	-2.32426
BnaA07g10520D	0	0	0	0	0	-2.32346
BnaA03g39920D	0	0	0	0	0	-2.32143
BnaA03g08590D	0	0	0	0	0	-2.32064
BnaC08g13950D	0	0	0	0	0	-2.31987
BnaA05g07200D	0	0	0	0	0	-2.31842
BnaC06g23330D	0	0	0	0	0	-2.31645
BnaA10g28720D	0	0	0	0	0	-2.31083
BnaC08g48560D	0	0	0	0	0	-2.30862
BnaCnng02950D	0	0	0	0	0	-2.30137
BnaC02g41180D	0	0	0	0	0	-2.30063
BnaA04g24090D	0	0	0	0	-1.11377	-2.29574
BnaC06g15950D	0	0	0	0	0	-2.29559
BnaC04g56730D	0	0	0	0	0	-2.29407
BnaC04g15310D	0	0	0	0	0	-2.29058
BnaC04g18920D	0	0	0	0	0	-2.29046
BnaC01g39760D	0	0	0	0	-1.62269	-2.28934
BnaA01g11960D	0	0	0	0	0	-2.28844
BnaA10g29340D	0	0	0	0	0	-2.2794
BnaA06g01920D	0	0	0	0	0	-2.27865
BnaCnng03050D	0	0	0	0	0	-2.27369
BnaA06g18430D	0	0	0	0	0	-2.27274
BnaCnng73380D	0	0	0	0	0	-2.26825
BnaA01g12820D	0	0	0	0	0	-2.2639
BnaA04g17080D	0	0	0	0	0	-2.263
BnaC03g61760D	0	0	0	0	0	-2.26263
BnaC07g27800D	0	0	0	0	0	-2.2604
BnaA08g01340D	0	0	0	0	0	-2.25799
BnaA01g18510D	0	0	0	0	0	-2.25786
BnaC08g06060D	0	0	0	0	0	-2.25742
BnaA02g18840D	0	0	0	0	0	-2.2548
BnaC04g03780D	0	0	0	0	0	-2.25175
BnaA02g12210D	0	0	0	0	0	-2.24891
BnaA10g01430D	0	0	0	0	0	-2.24405
BnaC09g22390D	0	0	0	0	0	-2.23636
BnaCnng72660D	0	0	0	0	0	-2.2264
BnaC08g13970D	0	0	0	0	0	-2.22568
BnaA08g22230D	0	0	0	0	-1.34493	-2.22305
BnaA05g11910D	0	0	0	0	0	-2.2201
BnaA06g39390D	0	0	0	0	0	-2.21598
BnaC07g19390D	0	0	0	0	0	-2.21439
BnaC03g37060D	0	0	0	0	0	-2.20996
BnaC03g55450D	0	0	0	0	0	-2.20974
BnaA07g31710D	0	0	0	0	0	-2.20907
BnaC02g43470D	0	0	0	0	0	-2.20862
BnaA02g25170D	0	0	0	0	0	-2.2073
BnaA01g15430D	0	0	0	0	-1.08854	-2.2058
BnaA05g01960D	0	0	0	0	0	-2.20208
BnaCnng01850D	0	0	0	0	0	-2.20109
BnaA05g05390D	0	0	0	0	0	-2.20003
BnaA06g28900D	0	0	0	0	0	-2.19971
BnaC02g26290D	0	0	0	0	0	-2.19854
BnaA04g21420D	0	0	0	0	0	-2.19844
BnaA06g03700D	0	0	0	0	0	-2.19747
BnaCnng31040D	0	0	0	0	0	-2.19143
BnaA01g12810D	0	0	0	0	0	-2.19044
BnaC04g38140D	0	0	0	0	0	-2.18887
BnaA03g18570D	0	0	0	0	0	-2.1877
BnaA10g16270D	0	0	0	0	0	-2.1795
BnaC06g02740D	0	0	0	0	0	-2.17285
BnaA03g49190D	0	0	0	0	0	-2.17095
BnaA06g37080D	0	0	0	0	0	-2.17003
BnaC03g72930D	0	0	0	0	0	-2.16604
BnaC08g43620D	0	0	0	0	0	-2.16576
BnaCnng38850D	0	0	0	0	0	-2.16393
BnaA02g35530D	0	0	0	0	0	-2.16375
BnaA03g06640D	0	0	0	0	0	-2.16262
BnaCnng01670D	0	0	0	0	0	-2.161
BnaA09g39050D	0	0	0	0	0	-2.15826
BnaCnng46610D	0	0	0	0	0	-2.15535
BnaC09g34240D	0	0	0	0	0	-2.15237
BnaA03g58260D	0	0	0	0	0	-2.15172
BnaC05g50730D	0	0	0	0	0	-2.15032
BnaA10g26680D	0	0	0	0	0	-2.14968
BnaC06g43560D	0	0	0	0	0	-2.14717
BnaC07g37000D	0	0	0	0	0	-2.14707
BnaA10g13380D	0	0	0	0	0	-2.14614
BnaC02g07540D	0	0	0	0	0	-2.14166
BnaC01g07630D	0	0	0	0	0	-2.14096
BnaC05g41870D	0	0	0	0	0	-2.14038
BnaC07g43990D	0	0	0	0	0	-2.13976
BnaA01g11700D	0	0	0	0	0	-2.13681
BnaC01g01680D	0	0	0	0	0	-2.13534
BnaC02g00460D	0	0	0	0	0	-2.13073
BnaA05g33770D	0	0	0	0	0	-2.13037
BnaA03g11770D	0	0	0	0	0	-2.12963
BnaAnng36200D	0	0	0	0	0	-2.12762
BnaCnng75720D	0	0	0	0	0	-2.12518
BnaA09g35520D	0	0	0	0	0	-2.12515
BnaC01g18170D	0	0	0	0	0	-2.12515
BnaCnng71550D	0	0	0	0	0	-2.12163
BnaA08g01770D	0	0	0	0	0	-2.11685
BnaA09g12730D	0	0	0	0	0	-2.10847
BnaC01g02330D	0	0	0	0	0	-2.10317
BnaA01g06370D	0	0	0	0	0	-2.09854
BnaA08g11380D	0	0	0	0	0	-2.09578
BnaA07g28080D	0	0	0	0	0	-2.09498
BnaA06g07600D	0	0	0	0	0	-2.0945
BnaC01g22480D	0	0	0	0	0	-2.09233
BnaA07g15810D	0	0	0	0	0	-2.08968
BnaA02g17260D	0	0	0	0	0	-2.08948
BnaC05g14950D	0	0	0	0	0	-2.08425
BnaC04g24490D	0	0	0	0	0	-2.08418
BnaC04g17300D	0	0	0	0	0	-2.08156
BnaCnng17590D	0	0	0	0	0	-2.07868
BnaC04g38490D	0	0	0	0	0	-2.07766
BnaA08g16350D	0	0	0	0	0	-2.07387
BnaCnng33710D	0	0	0	0	0	-2.06965
BnaC05g40440D	0	0	0	0	0	-2.06727
BnaC03g10670D	0	0	0	0	0	-2.06519
BnaA01g06640D	0	0	0	0	0	-2.06497
BnaA05g35760D	0	0	0	0	0	-2.06379
BnaC03g14290D	0	0	0	0	0	-2.06247
BnaA05g35020D	0	0	0	0	0	-2.06074
BnaCnng35090D	0	0	0	0	0	-2.05967
BnaA09g13580D	0	0	0	0	0	-2.05905
BnaA02g32440D	0	0	0	0	0	-2.05684
BnaA03g08390D	0	0	0	0	0	-2.05682
BnaAnng00950D	0	0	0	0	0	-2.05628
BnaC07g22980D	0	0	0	0	0	-2.05329
BnaAnng35830D	0	0	0	0	0	-2.05187
BnaA07g03710D	0	0	0	0	0	-2.04493
BnaC06g35560D	0	0	0	0	0	-2.03948
BnaA08g24940D	0	0	0	0	0	-2.0389
BnaA02g25180D	0	0	0	0	0	-2.03847
BnaC07g30400D	0	0	0	0	0	-2.03826
BnaC02g07020D	0	0	0	0	0	-2.03756
BnaC07g00340D	0	0	0	0	0	-2.03541
BnaC06g18370D	0	0	0	0	0	-2.03513
BnaA03g30000D	0	0	0	0	0	-2.03495
BnaA10g07270D	0	0	0	0	0	-2.03304
BnaCnng59830D	0	0	0	0	0	-2.03129
BnaC08g19280D	0	0	0	0	-1.14739	-2.01875
BnaC04g04400D	0	0	0	0	0	-2.01786
BnaA03g57190D	0	0	0	0	0	-2.01672
BnaA03g54320D	0	0	0	0	0	-2.01512
BnaC04g05450D	0	0	0	0	0	-2.01497
BnaA03g19400D	0	0	0	0	0	-2.00908
BnaA07g05390D	0	0	0	0	0	-2.00751
BnaAnng31450D	0	0	0	0	0	-2.00675
BnaA05g13030D	0	0	0	0	0	-2.00331
BnaA03g50250D	0	0	0	0	0	-2.00306
BnaCnng24960D	0	0	0	0	0	-2.00105
BnaC07g05830D	0	0	0	0	0	-1.99819
BnaC02g38800D	0	0	0	0	0	-1.99801
BnaC04g13950D	0	0	0	0	0	-1.99695
BnaA07g32200D	0	0	0	0	-1.4294	-1.99631
BnaCnng65040D	0	0	0	0	0	-1.99607
BnaA06g20940D	0	0	0	0	0	-1.99425
BnaA07g36440D	0	0	0	0	0	-1.99393
BnaA06g30720D	0	0	0	0	0	-1.99284
BnaA07g19120D	0	0	0	0	0	-1.99212
BnaA09g52090D	0	0	0	0	0	-1.99198
BnaA07g09330D	0	0	0	0	0	-1.99102
BnaC09g04990D	0	0	0	0	0	-1.98985
BnaC03g50640D	0	0	0	0	0	-1.98749
BnaA06g32840D	0	0	0	0	0	-1.98728
BnaA07g06770D	0	0	0	0	0	-1.98393
BnaA01g02780D	0	0	0	0	0	-1.9828
BnaC02g04870D	0	0	0	0	0	-1.98259
BnaA09g39580D	0	0	0	0	0	-1.98092
BnaA03g15870D	0	0	0	0	0	-1.97955
BnaA08g11030D	0	0	0	0	0	-1.97749
BnaA09g30290D	0	0	0	0	0	-1.97702
BnaC06g28390D	0	0	0	0	0	-1.97697
BnaC04g01170D	0	0	0	0	0	-1.97484
BnaA07g11770D	0	0	0	0	0	-1.9719
BnaA04g26290D	0	0	0	0	0	-1.97112
BnaC08g29910D	0	0	0	0	0	-1.97035
BnaC03g42920D	0	0	0	0	0	-1.96497
BnaA07g23310D	0	0	0	0	0	-1.96223
BnaC07g27050D	0	0	0	0	0	-1.96073
BnaC03g41490D	0	0	0	0	0	-1.96043
BnaAnng25820D	0	0	0	0	0	-1.95915
BnaCnng11320D	0	0	0	0	0	-1.95902
BnaC04g05580D	0	0	0	0	0	-1.95509
BnaC08g32360D	0	0	0	0	0	-1.95441
BnaA06g27480D	0	0	0	0	0	-1.95426
BnaA05g26770D	0	0	0	0	0	-1.95291
BnaC04g50590D	0	0	0	0	0	-1.95203
BnaC04g04780D	0	0	0	0	0	-1.95188
BnaA10g22670D	0	0	0	0	0	-1.95108
BnaA05g01120D	0	0	0	0	0	-1.94834
BnaC06g11760D	0	0	0	0	0	-1.94721
BnaA10g04040D	0	0	0	0	0	-1.94653
BnaC05g34570D	0	0	0	0	0	-1.94648
BnaA05g05020D	0	0	0	0	0	-1.94538
BnaCnng55740D	0	0	0	0	0	-1.94282
BnaA09g52270D	0	0	0	0	0	-1.94247
BnaA03g21030D	0	0	0	0	0	-1.94212
BnaA03g52920D	0	0	0	0	0	-1.94009
BnaA01g35580D	0	0	0	0	0	-1.93841
BnaA05g29810D	0	0	0	0	0	-1.93695
BnaAnng15760D	0	0	0	0	0	-1.93667
BnaA03g54160D	0	0	0	0	0	-1.93551
BnaC03g34730D	0	0	0	0	0	-1.93443
BnaA04g10320D	0	0	0	0	0	-1.93397
BnaC04g23140D	0	0	0	0	0	-1.93026
BnaC09g02230D	0	0	0	0	0	-1.92987
BnaA04g26560D	0	0	0	0	0	-1.92843
BnaCnng25660D	0	0	0	0	0	-1.92685
BnaA10g20670D	0	0	0	0	0	-1.92613
BnaA05g00130D	0	0	0	0	0	-1.92539
BnaA03g55940D	0	0	0	0	0	-1.92135
BnaA04g21960D	0	0	0	0	0	-1.91915
BnaC04g05070D	0	0	0	0	-2.05622	-1.91904
BnaC04g43770D	0	0	0	0	0	-1.91731
BnaA05g08310D	0	0	0	0	0	-1.91646
BnaA01g05280D	0	0	0	0	0	-1.9154
BnaC06g36410D	0	0	0	0	0	-1.91379
BnaA03g39800D	0	0	0	0	0	-1.91289
BnaA10g11600D	0	0	0	0	0	-1.90871
BnaA05g08730D	0	0	0	0	0	-1.90752
BnaA01g13890D	0	0	0	0	0	-1.90697
BnaC04g00020D	0	0	0	0	0	-1.90672
BnaC07g48390D	0	0	0	0	0	-1.90625
BnaA01g19230D	0	0	0	0	0	-1.90389
BnaA10g06290D	0	0	0	0	0	-1.90334
BnaA09g53400D	0	0	0	0	0	-1.90273
BnaAnng30710D	0	0	0	0	0	-1.89982
BnaC03g68880D	0	0	0	0	0	-1.89814
BnaA04g11700D	0	0	0	0	0	-1.89778
BnaC06g20270D	0	0	0	0	0	-1.89671
BnaAnng18410D	0	0	0	0	0	-1.89513
BnaA04g27120D	0	0	0	0	0	-1.89486
BnaA08g09100D	0	0	0	0	0	-1.89406
BnaC05g47100D	0	0	0	0	0	-1.89376
BnaA02g09520D	0	0	0	0	0	-1.89348
BnaA08g21730D	0	0	0	0	0	-1.89109
BnaA03g21930D	0	0	0	0	0	-1.89075
BnaC04g24020D	0	0	0	0	0	-1.88708
BnaA09g52990D	0	0	0	0	0	-1.88642
BnaCnng14430D	0	0	0	0	0	-1.88568
BnaA01g36890D	0	0	0	0	0	-1.8855
BnaA06g26390D	0	0	0	0	0	-1.88393
BnaC07g13300D	0	0	0	0	0	-1.88316
BnaA03g57690D	0	0	0	0	0	-1.88168
BnaA07g29490D	0	0	0	0	0	-1.87966
BnaA05g20100D	0	0	0	0	0	-1.87824
BnaCnng76000D	0	0	0	0	0	-1.87749
BnaC03g60860D	0	0	0	0	0	-1.8748
BnaA09g23850D	0	0	0	0	0	-1.87186
BnaC01g33830D	0	0	0	0	0	-1.86948
BnaC07g12870D	0	0	0	0	-1.18372	-1.86887
BnaAnng27240D	0	0	0	0	0	-1.8675
BnaA01g20560D	0	0	0	0	0	-1.86621
BnaC08g41390D	0	0	0	0	0	-1.86433
BnaC06g13220D	0	0	0	0	0	-1.86281
BnaA07g11590D	0	0	0	0	0	-1.86018
BnaC04g40730D	0	0	0	0	0	-1.85717
BnaC05g18820D	0	0	0	0	0	-1.85614
BnaC01g17520D	0	0	0	0	0	-1.85594
BnaA10g09570D	0	0	0	0	0	-1.85585
BnaA10g08550D	0	0	0	0	-1.25004	-1.85394
BnaC05g46330D	0	0	0	0	0	-1.85356
BnaC08g12610D	0	0	0	0	0	-1.85058
BnaC07g21370D	0	0	0	0	0	-1.84964
BnaA07g14940D	0	0	0	0	0	-1.84879
BnaA06g34430D	0	0	0	0	0	-1.84744
BnaC02g24360D	0	0	0	0	0	-1.84621
BnaC07g22240D	0	0	0	0	0	-1.84392
BnaA01g02240D	0	0	0	0	0	-1.84174
BnaA07g07370D	0	0	0	0	0	-1.8402
BnaC09g08400D	0	0	0	0	0	-1.83748
BnaA01g28710D	0	0	0	0	0	-1.83647
BnaA09g08540D	0	0	0	0	0	-1.83623
BnaA06g07180D	0	0	0	0	0	-1.83531
BnaC01g16330D	0	0	0	0	0	-1.83518
BnaC07g16030D	0	0	0	0	-1.18334	-1.83447
BnaC08g28150D	0	0	0	0	0	-1.83334
BnaA05g12490D	0	0	0	0	0	-1.83073
BnaA09g36970D	0	0	0	0	0	-1.82969
BnaA01g14240D	0	0	0	0	0	-1.82549
BnaAnng07910D	0	0	0	0	0	-1.8243
BnaC05g11430D	0	0	0	0	0	-1.82397
BnaA06g40940D	0	0	0	0	0	-1.8234
BnaA02g36580D	0	0	0	0	0	-1.82261
BnaA01g29000D	0	0	0	0	0	-1.82206
BnaA04g27160D	0	0	0	0	0	-1.82129
BnaC07g09060D	0	0	0	0	-1.36624	-1.82089
BnaA05g19550D	0	0	0	0	0	-1.82085
BnaAnng13970D	0	0	0	0	0	-1.82023
BnaC05g31460D	0	0	0	0	0	-1.81999
BnaC04g50940D	0	0	0	0	0	-1.81829
BnaC04g38390D	0	0	0	0	0	-1.81634
BnaA04g20580D	0	0	0	0	0	-1.81547
BnaA01g08930D	0	0	0	0	0	-1.81164
BnaCnng02480D	0	0	0	0	0	-1.81153
BnaC01g07430D	0	0	0	0	0	-1.81133
BnaA08g24710D	0	0	0	0	0	-1.81079
BnaA02g23290D	0	0	0	0	0	-1.81026
BnaUnng04840D	0	0	0	0	0	-1.8097
BnaA08g19000D	0	0	0	0	0	-1.8088
BnaA05g36440D	0	0	0	0	0	-1.80741
BnaC09g37040D	0	0	0	0	0	-1.80728
BnaA05g19640D	0	0	0	0	0	-1.80453
BnaC02g19980D	0	0	0	0	0	-1.80439
BnaC04g09090D	0	0	0	0	0	-1.80356
BnaC08g34080D	0	0	0	0	0	-1.80134
BnaC09g46680D	0	0	0	0	0	-1.80132
BnaC09g40060D	0	0	0	0	0	-1.80057
BnaAnng09360D	0	0	0	0	0	-1.79942
BnaC06g01220D	0	0	0	0	0	-1.79715
BnaCnng29490D	0	0	0	0	0	-1.79588
BnaC08g19510D	0	0	0	0	0	-1.79571
BnaA04g22640D	0	0	0	0	0	-1.79528
BnaA09g26160D	0	0	0	0	0	-1.79108
BnaA03g15930D	0	0	0	0	0	-1.79022
BnaC01g09940D	0	0	0	0	0	-1.7885
BnaA10g16170D	0	0	0	0	-1.40887	-1.78842
BnaC02g05020D	0	0	0	0	0	-1.78836
BnaA09g52260D	0	0	0	0	0	-1.78744
BnaA09g51830D	0	0	0	0	0	-1.78724
BnaC05g45640D	0	0	0	0	0	-1.78712
BnaA02g05240D	0	0	0	0	0	-1.78352
BnaC02g19180D	0	0	0	0	0	-1.78272
BnaA04g16000D	0	0	0	0	0	-1.78243
BnaA03g12300D	0	0	0	0	0	-1.7818
BnaA08g03140D	0	0	0	0	0	-1.78155
BnaC03g12910D	0	0	0	0	0	-1.78127
BnaC04g14260D	0	0	0	0	0	-1.78078
BnaC04g01120D	0	0	0	0	0	-1.78023
BnaA09g03190D	0	0	0	0	0	-1.77868
BnaA04g03710D	0	0	0	0	0	-1.77675
BnaA03g29440D	0	0	0	0	0	-1.7764
BnaC08g22010D	0	0	0	0	0	-1.77312
BnaCnng54500D	0	0	0	0	0	-1.77252
BnaA10g13830D	0	0	0	0	0	-1.77235
BnaA09g14700D	0	0	0	0	0	-1.77143
BnaA05g33760D	0	0	0	0	0	-1.77069
BnaC06g34520D	0	0	0	0	0	-1.77009
BnaA03g55180D	0	0	0	0	0	-1.7696
BnaA07g11270D	0	0	0	0	0	-1.76686
BnaCnng54760D	0	0	0	0	0	-1.76516
BnaC05g15670D	0	0	0	0	0	-1.76394
BnaC05g01490D	0	0	0	0	0	-1.76174
BnaA08g07950D	0	0	0	0	0	-1.76129
BnaA01g06860D	0	0	0	0	0	-1.76037
BnaA05g37040D	0	0	0	0	0	-1.76
BnaCnng54750D	0	0	0	0	0	-1.7591
BnaC04g14740D	0	0	0	0	0	-1.75517
BnaA01g15330D	0	0	0	0	0	-1.75296
BnaA05g23080D	0	0	0	0	0	-1.75181
BnaC09g23130D	0	0	0	0	0	-1.75145
BnaC07g51130D	0	0	0	0	0	-1.75128
BnaA03g50050D	0	0	0	0	0	-1.7511
BnaA08g29560D	0	0	0	0	0	-1.75073
BnaC05g38240D	0	0	0	0	0	-1.75055
BnaC08g39380D	0	0	0	0	0	-1.74999
BnaC03g71530D	0	0	0	0	-1.26121	-1.74995
BnaA03g25050D	0	0	0	0	0	-1.74762
BnaC09g53890D	0	0	0	0	0	-1.74503
BnaC03g24360D	0	0	0	0	0	-1.74435
BnaA10g01740D	0	0	0	0	0	-1.74298
BnaA10g19770D	0	0	0	0	0	-1.74136
BnaA01g03500D	0	0	0	0	0	-1.74114
BnaA03g04010D	0	0	0	0	0	-1.74084
BnaC01g10620D	0	0	0	0	0	-1.73895
BnaAnng00410D	0	0	0	0	0	-1.73795
BnaCnng20120D	0	0	0	0	0	-1.73716
BnaA09g52000D	0	0	0	0	0	-1.73615
BnaA06g31240D	0	0	0	0	0	-1.73574
BnaC01g16320D	0	0	0	0	0	-1.7353
BnaC05g16000D	0	0	0	0	0	-1.73527
BnaA05g11930D	0	0	0	0	0	-1.73496
BnaA09g33130D	0	0	0	0	0	-1.73491
BnaC08g27200D	0	0	0	0	0	-1.73452
BnaC02g38820D	0	0	0	0	0	-1.73415
BnaC08g19360D	0	0	0	0	0	-1.73369
BnaA05g32500D	0	0	0	0	0	-1.73196
BnaC02g03260D	0	0	0	0	0	-1.73051
BnaA10g11520D	0	0	0	0	0	-1.7303
BnaA09g35840D	0	0	0	0	0	-1.72926
BnaC04g47350D	0	0	0	0	0	-1.72835
BnaA06g02370D	0	0	0	0	0	-1.72811
BnaA06g24290D	0	0	0	0	0	-1.72608
BnaA03g53010D	0	0	0	0	0	-1.72552
BnaA04g21240D	0	0	0	0	0	-1.72489
BnaC08g40020D	0	0	0	0	0	-1.72459
BnaA04g05980D	0	0	0	0	0	-1.72344
BnaA08g10640D	0	0	0	0	0	-1.72334
BnaA03g27800D	0	0	0	0	0	-1.72325
BnaA09g13310D	0	0	0	0	0	-1.72316
BnaC05g41570D	0	0	0	0	0	-1.72242
BnaC05g11730D	0	0	0	0	0	-1.7218
BnaC01g01060D	0	0	0	0	0	-1.7205
BnaC07g38190D	0	0	0	0	0	-1.71996
BnaA06g07050D	0	0	0	0	0	-1.71882
BnaA06g02350D	0	0	0	0	0	-1.71851
BnaA01g08770D	0	0	0	0	0	-1.71403
BnaA06g35930D	0	0	0	0	0	-1.71268
BnaA01g16070D	0	0	0	0	0	-1.71119
BnaCnng51440D	0	0	0	0	0	-1.71101
BnaA03g17000D	0	0	0	0	0	-1.70871
BnaC04g08270D	0	0	0	0	0	-1.70837
BnaA02g18920D	0	0	0	0	0	-1.70658
BnaA03g13410D	0	0	0	0	0	-1.70429
BnaA04g02200D	0	0	0	0	0	-1.70426
BnaA09g57100D	0	0	0	0	0	-1.70414
BnaC07g15110D	0	0	0	0	0	-1.70299
BnaA10g04510D	0	0	0	0	0	-1.7028
BnaA01g23600D	0	0	0	0	0	-1.69914
BnaC04g48170D	0	0	0	0	0	-1.6991
BnaA10g11950D	0	0	0	0	0	-1.69792
BnaC03g42810D	0	0	0	0	0	-1.69701
BnaC04g12550D	0	0	0	0	0	-1.69693
BnaC03g19060D	0	0	0	0	0	-1.69584
BnaC05g19220D	0	0	0	0	0	-1.6953
BnaC01g29980D	0	0	0	0	0	-1.6946
BnaA08g15490D	0	0	0	0	0	-1.69389
BnaA01g23120D	0	0	0	0	0	-1.69227
BnaC04g16470D	0	0	0	0	0	-1.69226
BnaA01g07720D	0	0	0	0	0	-1.68952
BnaA09g14420D	0	0	0	0	0	-1.68932
BnaA06g03110D	0	0	0	0	0	-1.6893
BnaA03g27360D	0	0	0	0	0	-1.68888
BnaC09g48690D	0	0	0	0	0	-1.68816
BnaA09g30170D	0	0	0	0	0	-1.68769
BnaC04g06030D	0	0	0	0	0	-1.68649
BnaC02g38400D	0	0	0	0	0	-1.68608
BnaCnng58250D	0	0	0	0	0	-1.68596
BnaA01g22920D	0	0	0	0	0	-1.68525
BnaCnng03380D	0	0	0	0	0	-1.68514
BnaAnng26090D	0	0	0	0	0	-1.68502
BnaA03g00260D	0	0	0	0	0	-1.68412
BnaA05g10330D	0	0	0	0	0	-1.68215
BnaC07g42730D	0	0	0	0	0	-1.68127
BnaC03g32360D	0	0	0	0	0	-1.67992
BnaA07g23380D	0	0	0	0	0	-1.67825
BnaC04g50910D	0	0	0	0	0	-1.67678
BnaC04g47830D	0	0	0	0	0	-1.67661
BnaC07g39110D	0	0	0	0	0	-1.67627
BnaC01g01910D	0	0	0	0	0	-1.67522
BnaA09g25210D	0	0	0	0	0	-1.67521
BnaC02g43700D	0	0	0	0	0	-1.67399
BnaC06g06380D	0	0	0	0	0	-1.67392
BnaC03g23750D	0	0	0	0	0	-1.67229
BnaC07g43150D	0	0	0	0	0	-1.67108
BnaA09g16290D	0	0	0	0	0	-1.66943
BnaC05g19370D	0	0	0	0	0	-1.66918
BnaCnng00560D	0	0	0	0	0	-1.6684
BnaC03g21590D	0	0	0	0	0	-1.6676
BnaCnng02360D	0	0	0	0	0	-1.6648
BnaAnng07920D	0	0	0	0	0	-1.66466
BnaCnng18800D	0	0	0	0	0	-1.66421
BnaA06g35830D	0	0	0	0	0	-1.66276
BnaC03g15580D	0	0	0	0	0	-1.66057
BnaA09g29480D	0	0	0	0	0	-1.65972
BnaA09g24950D	0	0	0	0	0	-1.65964
BnaC01g13420D	0	0	0	0	0	-1.65927
BnaA07g03650D	0	0	0	0	0	-1.65816
BnaA09g09560D	0	0	0	0	0	-1.65413
BnaC05g07370D	0	0	0	0	0	-1.65362
BnaC02g05970D	0	0	0	0	0	-1.65132
BnaA10g26150D	0	0	0	0	0	-1.64995
BnaC04g08000D	0	0	0	0	0	-1.64829
BnaA09g12300D	0	0	0	0	0	-1.64827
BnaC01g01800D	0	0	0	0	0	-1.64817
BnaA06g31790D	0	0	0	0	0	-1.64788
BnaC05g13410D	0	0	0	0	0	-1.64784
BnaC09g02620D	0	0	0	0	0	-1.64722
BnaC06g34130D	0	0	0	0	-1.42696	-1.64669
BnaAnng16850D	0	0	0	0	0	-1.64668
BnaC05g51310D	0	0	0	0	0	-1.64336
BnaA09g44470D	0	0	0	0	0	-1.63965
BnaA01g02570D	0	0	0	0	0	-1.63912
BnaA09g48950D	0	0	0	0	0	-1.63821
BnaA06g12480D	0	0	0	0	0	-1.63723
BnaC09g01090D	0	0	0	0	0	-1.63605
BnaA06g11670D	0	0	0	0	0	-1.63507
BnaC07g06390D	0	0	0	0	0	-1.63236
BnaC07g44000D	0	0	0	0	0	-1.63061
BnaA04g11770D	0	0	0	0	0	-1.62813
BnaC08g37320D	0	0	0	0	0	-1.62805
BnaA01g11840D	0	0	0	0	0	-1.62767
BnaC08g05970D	0	0	0	0	0	-1.62212
BnaC05g40060D	0	0	0	0	0	-1.62167
BnaA09g53810D	0	0	0	0	0	-1.61974
BnaC09g48030D	0	0	0	0	0	-1.61861
BnaC09g27000D	0	0	0	0	0	-1.61679
BnaCnng35880D	0	0	0	0	0	-1.61668
BnaA03g38630D	0	0	0	0	2.03612	-1.61592
BnaA03g12810D	0	0	0	0	0	-1.61544
BnaA02g30490D	0	0	0	0	0	-1.61506
BnaA03g34850D	0	0	0	0	0	-1.61481
BnaC03g32310D	0	0	0	0	0	-1.61391
BnaC01g41070D	0	0	0	0	0	-1.61376
BnaA10g00990D	0	0	0	0	0	-1.61169
BnaC09g43750D	0	0	0	0	0	-1.61105
BnaA03g59990D	0	0	0	0	0	-1.61038
BnaA07g16800D	0	0	0	0	0	-1.60917
BnaA03g51290D	0	0	0	0	0	-1.60847
BnaC04g21400D	0	0	0	0	0	-1.60719
BnaC07g02390D	0	0	0	0	0	-1.60678
BnaC02g11090D	0	0	0	0	0	-1.60496
BnaA06g36160D	0	0	0	0	0	-1.60482
BnaAnng11700D	0	0	0	0	0	-1.6046
BnaC02g12740D	0	0	0	0	0	-1.603
BnaCnng52890D	0	0	0	0	0	-1.60275
BnaA03g25060D	0	0	0	0	0	-1.60081
BnaA07g25010D	0	0	0	0	0	-1.59914
BnaCnng63450D	0	0	0	0	0	-1.5986
BnaC09g39020D	0	0	0	0	0	-1.59678
BnaA04g23260D	0	0	0	0	0	-1.59653
BnaA10g27170D	0	0	0	0	0	-1.59426
BnaC05g37210D	0	0	0	0	0	-1.59423
BnaA01g06170D	0	0	0	0	0	-1.59276
BnaC03g54490D	0	0	0	0	0	-1.59266
BnaC07g50180D	0	0	0	0	0	-1.59151
BnaC07g42740D	0	0	0	0	0	-1.58958
BnaC08g29620D	0	0	0	0	0	-1.58877
BnaC06g35910D	0	0	0	0	0	-1.58852
BnaC03g26320D	0	0	0	0	0	-1.58793
BnaC07g31300D	0	0	0	0	0	-1.58716
BnaA03g08810D	0	0	0	0	0	-1.58661
BnaC08g28680D	0	0	0	0	0	-1.58571
BnaC01g07640D	0	0	0	0	0	-1.58567
BnaC02g44590D	0	0	0	0	0	-1.58437
BnaA05g03270D	0	0	0	0	0	-1.58385
BnaCnng24070D	0	0	0	0	0	-1.5833
BnaC05g45740D	0	0	0	0	0	-1.58213
BnaCnng06040D	0	0	0	0	0	-1.58089
BnaC06g35850D	0	0	0	0	0	-1.58066
BnaCnng30870D	0	0	0	0	0	-1.5801
BnaA09g48960D	0	0	0	0	0	-1.57945
BnaA02g34110D	0	0	0	0	0	-1.57801
BnaA09g04910D	0	0	0	0	0	-1.57738
BnaC03g26570D	0	0	0	0	0	-1.57682
BnaA01g14870D	0	0	0	0	0	-1.57575
BnaA03g05790D	0	0	0	0	0	-1.57549
BnaC05g08220D	0	0	0	0	0	-1.57444
BnaC03g30140D	0	0	0	0	0	-1.57434
BnaC07g27760D	0	0	0	0	0	-1.57418
BnaC03g48570D	0	0	0	0	0	-1.57407
BnaA02g30190D	0	0	0	0	0	-1.57375
BnaA03g43960D	0	0	0	0	0	-1.5732
BnaA07g35520D	0	0	0	0	0	-1.57314
BnaC04g04130D	0	0	0	0	0	-1.57246
BnaA08g22530D	0	0	0	0	0	-1.57209
BnaC07g29940D	0	0	0	0	0	-1.57202
BnaA09g06030D	0	0	0	0	0	-1.57147
BnaC07g43050D	0	0	0	0	0	-1.57146
BnaC07g08370D	0	0	0	0	0	-1.57103
BnaA01g05410D	0	0	0	0	0	-1.57057
BnaCnng54050D	0	0	0	0	0	-1.56944
BnaC01g11500D	0	0	0	0	0	-1.56933
BnaC03g22790D	0	0	0	0	0	-1.5684
BnaC05g45300D	0	0	0	0	0	-1.56712
BnaA03g00770D	0	0	0	0	0	-1.56475
BnaC06g32970D	0	0	0	0	0	-1.56409
BnaC07g35860D	0	0	0	0	0	-1.56047
BnaA07g20400D	0	0	0	0	0	-1.56017
BnaA06g40360D	0	0	0	0	0	-1.55915
BnaA05g01450D	0	0	0	0	0	-1.55878
BnaA07g16660D	0	0	0	0	0	-1.5581
BnaCnng38940D	0	0	0	0	0	-1.5573
BnaA09g02420D	0	0	0	0	0	-1.55689
BnaA04g25470D	0	0	0	0	0	-1.55594
BnaA06g38800D	0	0	0	0	0	-1.55526
BnaC06g06170D	0	0	0	0	0	-1.55503
BnaA03g52800D	0	0	0	0	0	-1.55467
BnaA03g40550D	0	0	0	0	0	-1.5531
BnaA03g30400D	0	0	0	0	0	-1.55275
BnaA07g16700D	0	0	0	0	0	-1.5522
BnaC07g22410D	0	0	0	0	0	-1.55219
BnaAnng09370D	0	0	0	0	0	-1.551
BnaC03g34010D	0	0	0	0	0	-1.55073
BnaA07g26510D	0	0	0	0	0	-1.54833
BnaA05g07580D	0	0	0	0	0	-1.54825
BnaA10g01180D	0	0	0	0	0	-1.54715
BnaA01g25950D	0	0	0	0	0	-1.54712
BnaA10g28210D	0	0	0	0	0	-1.54459
BnaA06g08090D	0	0	0	0	0	-1.54393
BnaA09g15520D	0	0	0	0	0	-1.54303
BnaA09g36960D	0	0	0	0	0	-1.54236
BnaA04g25040D	0	0	0	0	0	-1.54209
BnaA10g03990D	0	0	0	0	0	-1.54157
BnaC01g13470D	0	0	0	0	0	-1.54093
BnaCnng69490D	0	0	0	0	0	-1.54022
BnaA09g15720D	0	0	0	0	0	-1.54006
BnaC07g19260D	0	0	0	0	0	-1.53782
BnaC04g36020D	0	0	0	0	0	-1.53646
BnaC09g05510D	0	0	0	0	0	-1.53519
BnaA06g31930D	0	0	0	0	0	-1.53452
BnaA03g16160D	0	0	0	0	0	-1.53391
BnaA07g23670D	0	0	0	0	0	-1.5332
BnaC09g45580D	0	0	0	0	0	-1.5332
BnaA02g23870D	0	0	0	0	0	-1.53207
BnaC04g36630D	0	0	0	0	0	-1.53108
BnaA03g23610D	0	0	0	0	0	-1.53096
BnaC05g40790D	0	0	0	0	0	-1.52921
BnaCnng66930D	0	0	0	0	0	-1.52914
BnaA10g23430D	0	0	0	0	0	-1.52846
BnaA03g55480D	0	0	0	0	0	-1.5254
BnaA07g07500D	0	0	0	0	0	-1.52338
BnaA04g01730D	0	0	0	0	0	-1.52333
BnaA02g12880D	0	0	0	0	0	-1.52308
BnaA09g05510D	0	0	0	0	0	-1.52239
BnaAnng06950D	0	0	0	0	0	-1.5217
BnaC07g23300D	0	0	0	0	0	-1.51991
BnaC05g43230D	0	0	0	0	0	-1.51924
BnaCnng36050D	0	0	0	0	0	-1.51894
BnaC01g37590D	0	0	0	0	-1.52073	-1.51875
BnaA01g12190D	0	0	0	0	0	-1.51874
BnaCnng13770D	0	0	0	0	0	-1.51783
BnaA05g02000D	0	0	0	0	0	-1.51776
BnaCnng64490D	0	0	0	0	-1.24202	-1.51668
BnaC03g62970D	0	0	0	0	0	-1.51588
BnaA10g20730D	0	0	0	0	0	-1.51366
BnaA04g11410D	0	0	0	0	0	-1.51337
BnaCnng45910D	0	0	0	0	0	-1.51234
BnaA01g00150D	0	0	0	0	0	-1.51175
BnaC04g02190D	0	0	0	0	0	-1.51072
BnaA01g22460D	0	0	0	0	0	-1.51023
BnaA01g22670D	0	0	0	0	0	-1.50968
BnaC02g37020D	0	0	0	0	0	-1.5092
BnaC03g70280D	0	0	0	0	0	-1.50904
BnaC07g46660D	0	0	0	0	0	-1.5085
BnaC05g47950D	0	0	0	0	0	-1.50795
BnaA05g04600D	0	0	0	0	0	-1.50606
BnaA01g05270D	0	0	0	0	0	-1.50593
BnaA01g13220D	0	0	0	0	0	-1.50418
BnaC01g03510D	0	0	0	0	0	-1.50188
BnaC09g11090D	0	0	0	0	0	-1.50172
BnaA09g12360D	0	0	0	0	0	-1.50144
BnaC01g00120D	0	0	0	0	0	-1.5006
BnaC07g13370D	0	0	0	0	0	-1.50041
BnaA07g10530D	0	0	0	0	0	-1.49981
BnaA03g27300D	0	0	0	0	0	-1.49943
BnaA08g24930D	0	0	0	0	0	-1.49857
BnaC01g32810D	0	0	0	0	0	-1.49771
BnaA05g31150D	0	0	0	0	0	-1.49671
BnaC03g78000D	0	0	0	0	0	-1.49564
BnaC01g41000D	0	0	0	0	0	-1.4936
BnaC01g08230D	0	0	0	0	0	-1.49281
BnaA08g12410D	0	0	0	0	0	-1.49265
BnaA03g41830D	0	0	0	0	0	-1.49219
BnaA09g17120D	0	0	0	0	0	-1.49098
BnaA08g29650D	0	0	0	0	0	-1.49082
BnaAnng20880D	0	0	0	0	0	-1.49061
BnaA05g31200D	0	0	0	0	0	-1.48902
BnaC07g23610D	0	0	0	0	0	-1.48876
BnaA06g06000D	0	0	0	0	-1.26871	-1.48734
BnaA03g14550D	0	0	0	0	-1.32486	-1.48708
BnaCnng10940D	0	0	0	0	0	-1.48582
BnaC01g07450D	0	0	0	0	0	-1.48495
BnaC08g39700D	0	0	0	0	0	-1.48473
BnaA06g37340D	0	0	0	0	0	-1.4844
BnaA04g16260D	0	0	0	0	0	-1.48437
BnaCnng57860D	0	0	0	0	0	-1.4827
BnaC05g08120D	0	0	0	0	0	-1.48264
BnaC02g09720D	0	0	0	0	0	-1.48225
BnaA03g27330D	0	0	0	0	0	-1.48215
BnaC09g25860D	0	0	0	0	0	-1.48001
BnaA05g36120D	0	0	0	0	0	-1.47975
BnaC09g16940D	0	0	0	0	0	-1.47899
BnaA08g23740D	0	0	0	0	0	-1.47741
BnaC09g19940D	0	0	0	0	0	-1.4771
BnaA04g00820D	0	0	0	0	0	-1.47572
BnaA02g09840D	0	0	0	0	0	-1.47525
BnaA02g01730D	0	0	0	0	0	-1.47483
BnaA07g29720D	0	0	0	0	0	-1.47413
BnaA05g27860D	0	0	0	0	0	-1.47385
BnaC07g41210D	0	0	0	0	0	-1.47207
BnaA01g10230D	0	0	0	0	0	-1.47198
BnaC09g50460D	0	0	0	0	0	-1.47185
BnaA05g30760D	0	0	0	0	0	-1.47156
BnaC07g15380D	0	0	0	0	0	-1.4686
BnaA03g56350D	0	0	0	0	0	-1.4675
BnaA03g21760D	0	0	0	0	0	-1.46692
BnaC03g27610D	0	0	0	0	0	-1.46692
BnaA05g16450D	0	0	0	0	0	-1.46686
BnaC04g40080D	0	0	0	0	0	-1.46658
BnaC07g46690D	0	0	0	0	0	-1.46583
BnaA03g22020D	0	0	0	0	0	-1.46557
BnaC02g39080D	0	0	0	0	0	-1.46514
BnaC07g02020D	0	0	0	0	0	-1.46406
BnaCnng47330D	0	0	0	0	0	-1.46381
BnaC09g48100D	0	0	0	0	0	-1.46336
BnaC03g21820D	0	0	0	0	0	-1.46302
BnaA07g11240D	0	0	0	0	0	-1.46261
BnaA02g19500D	0	0	0	0	0	-1.46182
BnaCnng24110D	0	0	0	0	0	-1.46171
BnaC08g24890D	0	0	0	0	0	-1.46146
BnaA01g22500D	0	0	0	0	0	-1.46129
BnaCnng43110D	0	0	0	0	0	-1.46047
BnaC02g24840D	0	0	0	0	0	-1.45845
BnaA09g50090D	0	0	0	0	0	-1.45624
BnaA05g15910D	0	0	0	0	0	-1.4551
BnaA07g10170D	0	0	0	0	0	-1.45501
BnaC01g43600D	0	0	0	0	0	-1.455
BnaC05g13520D	0	0	0	0	0	-1.45422
BnaA01g11930D	0	0	0	0	0	-1.45405
BnaC05g11410D	0	0	0	0	0	-1.4537
BnaA10g09660D	0	0	0	0	0	-1.45333
BnaC07g47590D	0	0	0	0	0	-1.45319
BnaA04g14230D	0	0	0	0	0	-1.45267
BnaC08g25210D	0	0	0	0	0	-1.44811
BnaC02g18910D	0	0	0	0	0	-1.44808
BnaC05g01100D	0	0	0	0	0	-1.4472
BnaA03g49570D	0	0	0	0	0	-1.4469
BnaC08g28030D	0	0	0	0	0	-1.44661
BnaA03g43210D	0	0	0	0	0	-1.44624
BnaA08g19770D	0	0	0	0	0	-1.4433
BnaC03g28030D	0	0	0	0	0	-1.44243
BnaC03g74010D	0	0	0	0	0	-1.44234
BnaA09g40120D	0	0	0	0	0	-1.44023
BnaA09g31010D	0	0	0	0	0	-1.44008
BnaCnng25620D	0	0	0	0	0	-1.44006
BnaA09g39000D	0	0	0	0	0	-1.44005
BnaC02g19780D	0	0	0	0	0	-1.43668
BnaA06g37040D	0	0	0	0	0	-1.43625
BnaA01g01320D	0	0	0	0	0	-1.43531
BnaC02g22590D	0	0	0	0	0	-1.4345
BnaC07g35250D	0	0	0	0	0	-1.43139
BnaA10g02870D	0	0	0	0	0	-1.42971
BnaC03g60050D	0	0	0	0	0	-1.42961
BnaA01g09890D	0	0	0	0	0	-1.4296
BnaA09g52130D	0	0	0	0	0	-1.42949
BnaA08g22410D	0	0	0	0	0	-1.42898
BnaC06g39440D	0	0	0	0	0	-1.42827
BnaC03g59080D	0	0	0	0	0	-1.4272
BnaC09g49180D	0	0	0	0	0	-1.42478
BnaA02g31380D	0	0	0	0	0	-1.42417
BnaA06g03540D	0	0	0	0	0	-1.42407
BnaC08g32920D	0	0	0	0	0	-1.42356
BnaC03g72310D	0	0	0	0	0	-1.4235
BnaC06g01430D	0	0	0	0	0	-1.42077
BnaC09g26400D	0	0	0	0	0	-1.42025
BnaCnng26370D	0	0	0	0	0	-1.42009
BnaC09g08020D	0	0	0	0	0	-1.41925
BnaA08g31010D	0	0	0	0	0	-1.41924
BnaA05g04510D	0	0	0	0	0	-1.41919
BnaA07g18810D	0	0	0	0	0	-1.41886
BnaA02g29970D	0	0	0	0	0	-1.41855
BnaC09g22320D	0	0	0	0	0	-1.41788
BnaA03g21210D	0	0	0	0	0	-1.41722
BnaAnng40470D	0	0	0	0	0	-1.41691
BnaC05g02780D	0	0	0	0	0	-1.41674
BnaA10g13800D	0	0	0	0	0	-1.41669
BnaA02g31570D	0	0	0	0	0	-1.41571
BnaA06g37910D	0	0	0	0	0	-1.41526
BnaC07g21270D	0	0	0	0	0	-1.41103
BnaC07g34510D	0	0	0	0	0	-1.411
BnaA10g16590D	0	0	0	0	0	-1.41093
BnaC05g02700D	0	0	0	0	0	-1.41052
BnaA03g55050D	0	0	0	0	0	-1.40914
BnaC08g10150D	0	0	0	0	0	-1.40824
BnaA02g20890D	0	0	0	0	0	-1.40757
BnaC04g54460D	0	0	0	0	0	-1.40724
BnaC01g03560D	0	0	0	0	0	-1.40709
BnaAnng08880D	0	0	0	0	0	-1.40639
BnaC04g40390D	0	0	0	0	0	-1.40552
BnaC07g17610D	0	0	0	0	0	-1.40444
BnaA09g47060D	0	0	0	0	0	-1.40375
BnaA06g07410D	0	0	0	0	0	-1.40311
BnaC04g47840D	0	0	0	0	0	-1.40272
BnaA07g02540D	0	0	0	0	0	-1.40251
BnaC08g09190D	0	0	0	0	0	-1.3997
BnaA10g22060D	0	0	0	0	0	-1.39886
BnaA09g13190D	0	0	0	0	0	-1.39873
BnaAnng11870D	0	0	0	0	0	-1.39758
BnaC06g39540D	0	0	0	0	0	-1.39699
BnaA08g29950D	0	0	0	0	0	-1.39638
BnaA04g13840D	0	0	0	0	0	-1.39562
BnaA05g02300D	0	0	0	0	0	-1.39511
BnaA06g02520D	0	0	0	0	0	-1.39505
BnaA08g12060D	0	0	0	0	0	-1.39463
BnaC09g30710D	0	0	0	0	0	-1.39455
BnaA08g25610D	0	0	0	0	0	-1.39436
BnaC05g09460D	0	0	0	0	0	-1.39405
BnaC03g10290D	0	0	0	0	0	-1.39391
BnaC08g18160D	0	0	0	0	0	-1.39311
BnaA01g05290D	0	0	0	0	0	-1.39295
BnaA02g35780D	0	0	0	0	0	-1.39288
BnaC04g33120D	0	0	0	0	0	-1.39257
BnaC03g46570D	0	0	0	0	0	-1.39171
BnaC09g44690D	0	0	0	0	0	-1.39125
BnaA02g07990D	0	0	0	0	0	-1.3906
BnaC07g00210D	0	0	0	0	0	-1.39043
BnaA06g36370D	0	0	0	0	0	-1.38865
BnaA10g26350D	0	0	0	0	0	-1.38847
BnaC02g28050D	0	0	0	0	0	-1.38839
BnaC05g44660D	0	0	0	0	0	-1.38795
BnaC04g35190D	0	0	0	0	0	-1.3878
BnaCnng52620D	0	0	0	0	0	-1.38761
BnaA10g05520D	0	0	0	0	0	-1.38663
BnaC04g45420D	0	0	0	0	0	-1.38595
BnaA09g54940D	0	0	0	0	0	-1.38585
BnaC03g08460D	0	0	0	0	0	-1.38509
BnaA01g33120D	0	0	0	0	0	-1.38494
BnaA06g23560D	0	0	0	0	0	-1.38436
BnaA04g29570D	0	0	0	0	0	-1.38307
BnaA09g37160D	0	0	0	0	0	-1.38266
BnaA03g32610D	0	0	0	0	0	-1.38251
BnaC05g48460D	0	0	0	0	0	-1.3816
BnaA02g33920D	0	0	0	0	0	-1.3812
BnaA07g21910D	0	0	0	0	0	-1.38051
BnaA03g02250D	0	0	0	0	0	-1.37952
BnaC05g45690D	0	0	0	0	0	-1.37888
BnaA09g15440D	0	0	0	0	0	-1.37837
BnaA05g18100D	0	0	0	0	0	-1.37832
BnaC02g48700D	0	0	0	0	0	-1.37758
BnaC06g39000D	0	0	0	0	0	-1.37513
BnaA04g14490D	0	0	0	0	0	-1.37486
BnaC09g32610D	0	0	0	0	0	-1.37407
BnaC06g43960D	0	0	0	0	0	-1.37395
BnaA08g09350D	0	0	0	0	0	-1.3724
BnaC04g40820D	0	0	0	0	0	-1.37015
BnaCnng38460D	0	0	0	0	0	-1.37007
BnaA05g31420D	0	0	0	0	0	-1.36865
BnaA07g01940D	0	0	0	0	0	-1.36795
BnaA03g05840D	0	0	0	0	0	-1.36591
BnaA07g07550D	0	0	0	0	0	-1.3655
BnaA01g09140D	0	0	0	0	0	-1.36514
BnaA01g25000D	0	0	0	0	0	-1.36285
BnaC09g47230D	0	0	0	0	0	-1.36238
BnaA09g40110D	0	0	0	0	0	-1.36146
BnaC09g13680D	0	0	0	0	0	-1.35938
BnaA08g17650D	0	0	0	0	0	-1.35818
BnaA06g37900D	0	0	0	0	0	-1.35742
BnaC07g37060D	0	0	0	0	0	-1.35727
BnaC02g03290D	0	0	0	0	0	-1.35644
BnaA03g58750D	0	0	0	0	0	-1.3558
BnaC03g52910D	0	0	0	0	0	-1.35349
BnaA06g22890D	0	0	0	0	0	-1.35338
BnaC01g14590D	0	0	0	0	0	-1.35269
BnaA03g37660D	0	0	0	0	0	-1.35186
BnaA03g55080D	0	0	0	0	0	-1.35128
BnaA10g03060D	0	0	0	0	0	-1.35094
BnaA08g16080D	0	0	0	0	0	-1.34937
BnaCnng01390D	0	0	0	0	0	-1.34826
BnaC09g48700D	0	0	0	0	0	-1.34772
BnaA02g12330D	0	0	0	0	0	-1.34679
BnaA07g23080D	0	0	0	0	0	-1.34666
BnaA07g17130D	0	0	0	0	0	-1.34646
BnaA02g27980D	0	0	0	0	0	-1.34553
BnaC04g39530D	0	0	0	0	0	-1.34277
BnaC01g11740D	0	0	0	0	0	-1.34193
BnaA07g21710D	0	0	0	0	0	-1.34159
BnaA01g13040D	0	0	0	0	0	-1.34057
BnaC07g43200D	0	0	0	0	0	-1.34016
BnaA09g29660D	0	0	0	0	0	-1.3401
BnaA09g12900D	0	0	0	0	0	-1.33962
BnaCnng38040D	0	0	0	0	0	-1.33955
BnaA10g04730D	0	0	0	0	0	-1.33881
BnaC02g15050D	0	0	0	0	0	-1.33792
BnaA08g22240D	0	0	0	0	0	-1.33693
BnaA10g12820D	0	0	0	0	0	-1.33675
BnaA07g34690D	0	0	0	0	0	-1.33664
BnaAnng35580D	0	0	0	0	-2.14777	-1.33657
BnaA05g11020D	0	0	0	0	0	-1.33649
BnaA03g36640D	0	0	0	0	0	-1.33628
BnaC07g18710D	0	0	0	0	0	-1.33492
BnaC09g04080D	0	0	0	0	0	-1.33416
BnaA03g18830D	0	0	0	0	0	-1.33382
BnaA08g28670D	0	0	0	0	0	-1.33288
BnaC04g11250D	0	0	0	0	0	-1.33161
BnaC05g05070D	0	0	0	0	0	-1.33117
BnaC05g50050D	0	0	0	0	0	-1.33066
BnaC08g28970D	0	0	0	0	0	-1.3306
BnaC07g18380D	0	0	0	0	0	-1.3286
BnaA01g01140D	0	0	0	0	0	-1.32768
BnaA03g09600D	0	0	0	0	0	-1.32701
BnaCnng38120D	0	0	0	0	0	-1.32681
BnaA01g14860D	0	0	0	0	0	-1.32587
BnaA03g45080D	0	0	0	0	0	-1.32587
BnaC07g38350D	0	0	0	0	0	-1.32499
BnaA08g21160D	0	0	0	0	0	-1.32231
BnaC03g76640D	0	0	0	0	0	-1.32155
BnaAnng12320D	0	0	0	0	0	-1.32138
BnaC03g20630D	0	0	0	0	0	-1.32108
BnaA07g32400D	0	0	0	0	0	-1.31928
BnaC03g30050D	0	0	0	0	0	-1.31909
BnaC02g26240D	0	0	0	0	0	-1.31744
BnaA05g06080D	0	0	0	0	0	-1.31574
BnaC04g12840D	0	0	0	0	0	-1.31543
BnaAnng14200D	0	0	0	0	0	-1.31455
BnaA02g05840D	0	0	0	0	0	-1.31238
BnaC09g25070D	0	0	0	0	0	-1.31204
BnaA06g23800D	0	0	0	0	0	-1.31196
BnaA09g05930D	0	0	0	0	0	-1.31121
BnaAnng35300D	0	0	0	0	0	-1.31116
BnaA06g40330D	0	0	0	0	0	-1.31074
BnaA09g07080D	0	0	0	0	0	-1.30995
BnaC03g51740D	0	0	0	0	0	-1.30846
BnaC07g32100D	0	0	0	0	0	-1.30812
BnaC03g24380D	0	0	0	0	0	-1.30804
BnaA03g08820D	0	0	0	0	0	-1.30803
BnaCnng34030D	0	0	0	0	0	-1.30654
BnaA04g28330D	0	0	0	0	0	-1.30628
BnaA07g12700D	0	0	0	0	0	-1.30598
BnaC03g68600D	0	0	0	0	0	-1.30585
BnaA05g36400D	0	0	0	0	0	-1.30535
BnaA07g10320D	0	0	0	0	0	-1.30271
BnaC04g19270D	0	0	0	0	0	-1.3026
BnaA06g04030D	0	0	0	0	0	-1.30167
BnaC03g34830D	0	0	0	0	0	-1.30049
BnaCnng03370D	0	0	0	0	0	-1.30014
BnaA03g23330D	0	0	0	0	0	-1.29948
BnaCnng14480D	0	0	0	0	0	-1.29886
BnaA03g21040D	0	0	0	0	0	-1.2984
BnaA06g38110D	0	0	0	0	0	-1.298
BnaA02g22810D	0	0	0	0	0	-1.29768
BnaC06g16100D	0	0	0	0	0	-1.29721
BnaAnng07600D	0	0	0	0	0	-1.29581
BnaA09g16590D	0	0	0	0	0	-1.29566
BnaAnng30860D	0	0	0	0	0	-1.29562
BnaC09g36350D	0	0	0	0	0	-1.29475
BnaA08g14220D	0	0	0	0	0	-1.29466
BnaC01g09930D	0	0	0	0	0	-1.29437
BnaA06g33450D	0	0	0	0	0	-1.29429
BnaA02g05040D	0	0	0	0	0	-1.29351
BnaA03g45950D	0	0	0	0	0	-1.29236
BnaA07g24830D	0	0	0	0	0	-1.29089
BnaC01g14990D	0	0	0	0	0	-1.29049
BnaC04g46140D	0	0	0	0	0	-1.29033
BnaA03g47600D	0	0	0	0	0	-1.29006
BnaAnng13830D	0	0	0	0	0	-1.28965
BnaAnng29830D	0	0	0	0	0	-1.2894
BnaC03g51850D	0	0	0	0	0	-1.28771
BnaC03g63410D	0	0	0	0	0	-1.2863
BnaC05g04430D	0	0	0	0	0	-1.28504
BnaC04g35930D	0	0	0	0	0	-1.28326
BnaA08g30700D	0	0	0	0	0	-1.28166
BnaA10g02690D	0	0	0	0	0	-1.28085
BnaA09g47420D	0	0	0	0	0	-1.27841
BnaC06g30760D	0	0	0	0	0	-1.27651
BnaC03g50490D	0	0	0	0	0	-1.27604
BnaC03g38320D	0	0	0	0	0	-1.27544
BnaA08g00080D	0	0	0	0	0	-1.27535
BnaC09g33650D	0	0	0	0	0	-1.27473
BnaA10g16940D	0	0	0	0	0	-1.27436
BnaA04g13550D	0	0	0	0	0	-1.27313
BnaC04g07870D	0	0	0	0	0	-1.27145
BnaA09g08700D	0	0	0	0	0	-1.26923
BnaC09g46440D	0	0	0	0	0	-1.26863
BnaA04g21820D	0	0	0	0	0	-1.26781
BnaC03g08260D	0	0	0	0	0	-1.26768
BnaC07g03940D	0	0	0	0	0	-1.26735
BnaCnng17780D	0	0	0	0	0	-1.26619
BnaA06g10110D	0	0	0	0	0	-1.26589
BnaAnng31570D	0	0	0	0	0	-1.26358
BnaC02g13190D	0	0	0	0	0	-1.26358
BnaC09g49710D	0	0	0	0	0	-1.26232
BnaC05g02520D	0	0	0	0	0	-1.26174
BnaC01g20230D	0	0	0	0	0	-1.26098
BnaC07g22840D	0	0	0	0	0	-1.26082
BnaC04g01640D	0	0	0	0	0	-1.26034
BnaC04g02880D	0	0	0	0	0	-1.26025
BnaC03g26480D	0	0	0	0	0	-1.25918
BnaA05g12320D	0	0	0	0	0	-1.25886
BnaC01g03210D	0	0	0	0	0	-1.25827
BnaA07g16060D	0	0	0	0	0	-1.25814
BnaA05g19230D	0	0	0	0	0	-1.25729
BnaCnng25850D	0	0	0	0	0	-1.25674
BnaA05g03420D	0	0	0	0	0	-1.25599
BnaC09g36490D	0	0	0	0	0	-1.25523
BnaA06g26150D	0	0	0	0	0	-1.25438
BnaA08g25280D	0	0	0	0	0	-1.25336
BnaA07g31980D	0	0	0	0	0	-1.25312
BnaC02g38230D	0	0	0	0	0	-1.25259
BnaCnng08720D	0	0	0	0	0	-1.25211
BnaC07g30970D	0	0	0	0	0	-1.25171
BnaA03g39380D	0	0	0	0	0	-1.25113
BnaA02g09700D	0	0	0	0	0	-1.25005
BnaC05g30650D	0	0	0	0	0	-1.24971
BnaA03g49910D	0	0	0	0	0	-1.24955
BnaC06g24320D	0	0	0	0	0	-1.249
BnaA01g28460D	0	0	0	0	0	-1.24888
BnaC09g02880D	0	0	0	0	0	-1.24733
BnaA03g51830D	0	0	0	0	0	-1.2473
BnaA02g02290D	0	0	0	0	0	-1.2472
BnaA08g21240D	0	0	0	0	0	-1.24684
BnaA10g01400D	0	0	0	0	0	-1.24583
BnaA04g19190D	0	0	0	0	0	-1.24569
BnaA05g08250D	0	0	0	0	0	-1.24562
BnaA01g35130D	0	0	0	0	0	-1.24444
BnaA08g30320D	0	0	0	0	0	-1.24437
BnaA08g10790D	0	0	0	0	0	-1.24291
BnaC04g43580D	0	0	0	0	0	-1.23982
BnaC07g43360D	0	0	0	0	0	-1.23895
BnaC02g06200D	0	0	0	0	0	-1.23829
BnaCnng36960D	0	0	0	0	0	-1.23687
BnaC07g47170D	0	0	0	0	0	-1.23684
BnaC08g08040D	0	0	0	0	0	-1.23608
BnaC08g34510D	0	0	0	0	0	-1.23524
BnaC02g15500D	0	0	0	0	0	-1.23472
BnaC03g24270D	0	0	0	0	0	-1.23433
BnaC08g25680D	0	0	0	0	0	-1.2342
BnaA05g31120D	0	0	0	0	0	-1.23331
BnaA05g20800D	0	0	0	0	0	-1.23319
BnaC04g08930D	0	0	0	0	0	-1.23301
BnaA01g14720D	0	0	0	0	0	-1.23164
BnaA03g06610D	0	0	0	0	0	-1.23121
BnaC03g48650D	0	0	0	0	0	-1.23113
BnaC05g00620D	0	0	0	0	0	-1.23109
BnaC06g38840D	0	0	0	0	0	-1.23066
BnaC06g16790D	0	0	0	0	0	-1.23025
BnaC08g49200D	0	0	0	0	0	-1.2294
BnaA03g12700D	0	0	0	0	0	-1.22913
BnaC05g44980D	0	0	0	0	0	-1.22823
BnaA07g24560D	0	0	0	0	0	-1.22815
BnaC07g26130D	0	0	0	0	0	-1.22775
BnaA08g00360D	0	0	0	0	0	-1.22741
BnaC07g37320D	0	0	0	0	0	-1.22714
BnaA06g36630D	0	0	0	0	0	-1.22662
BnaC02g14950D	0	0	0	0	0	-1.22645
BnaC09g19560D	0	0	0	0	0	-1.22611
BnaAnng02890D	0	0	0	0	0	-1.22567
BnaC02g33410D	0	0	0	0	0	-1.22532
BnaC04g28590D	0	0	0	0	0	-1.22361
BnaC02g24380D	0	0	0	0	0	-1.2235
BnaA06g02700D	0	0	0	0	0	-1.22324
BnaC09g43510D	0	0	0	0	0	-1.22221
BnaA08g17170D	0	0	0	0	0	-1.22211
BnaC01g06150D	0	0	0	0	0	-1.22201
BnaC05g01720D	0	0	0	0	0	-1.22153
BnaC06g20260D	0	0	0	0	0	-1.22149
BnaC08g11100D	0	0	0	0	0	-1.2212
BnaC01g44580D	0	0	0	0	0	-1.21911
BnaC03g35770D	0	0	0	0	0	-1.21893
BnaCnng30140D	0	0	0	0	0	-1.21823
BnaA06g28960D	0	0	0	0	0	-1.21818
BnaC04g09020D	0	0	0	0	0	-1.218
BnaC05g43070D	0	0	0	0	0	-1.21705
BnaA02g05780D	0	0	0	0	0	-1.21633
BnaC05g28510D	0	0	0	0	0	-1.21554
BnaC05g05370D	0	0	0	0	0	-1.21205
BnaAnng31940D	0	0	0	0	0	-1.2076
BnaAnng22230D	0	0	0	0	0	-1.20714
BnaCnng60400D	0	0	0	0	0	-1.20649
BnaC09g23090D	0	0	0	0	0	-1.20544
BnaA05g16680D	0	0	0	0	0	-1.20506
BnaA02g09460D	0	0	0	0	0	-1.20454
BnaCnng17230D	0	0	0	0	0	-1.20432
BnaCnng07310D	0	0	0	0	0	-1.20397
BnaC09g17180D	0	0	0	0	0	-1.20382
BnaA03g00640D	0	0	0	0	0	-1.20323
BnaC01g13790D	0	0	0	0	0	-1.20314
BnaA09g54200D	0	0	0	0	0	-1.20292
BnaA02g33770D	0	0	0	0	0	-1.20135
BnaC03g00160D	0	0	0	0	-1.16928	-1.19987
BnaA09g39040D	0	0	0	0	0	-1.19878
BnaC05g05020D	0	0	0	0	0	-1.1986
BnaA02g29480D	0	0	0	0	0	-1.19857
BnaA05g05600D	0	0	0	0	0	-1.19802
BnaA08g20030D	0	0	0	0	0	-1.198
BnaC04g45930D	0	0	0	0	0	-1.19788
BnaAnng04800D	0	0	0	0	0	-1.19561
BnaA05g19760D	0	0	0	0	0	-1.19542
BnaA05g23420D	0	0	0	0	0	-1.1934
BnaA04g09880D	0	0	0	0	0	-1.19226
BnaC07g16450D	0	0	0	0	0	-1.19165
BnaC03g26400D	0	0	0	0	0	-1.19102
BnaA08g25120D	0	0	0	0	0	-1.19068
BnaC03g76010D	0	0	0	0	0	-1.18844
BnaA10g07350D	0	0	0	0	0	-1.18783
BnaC05g12180D	0	0	0	0	0	-1.18743
BnaA03g47610D	0	0	0	0	0	-1.18677
BnaA08g21050D	0	0	0	0	0	-1.18661
BnaA06g26320D	0	0	0	0	0	-1.18649
BnaA10g23080D	0	0	0	0	0	-1.18633
BnaC05g17260D	0	0	0	0	0	-1.18588
BnaA01g10530D	0	0	0	0	0	-1.18539
BnaA08g21800D	0	0	0	0	0	-1.18537
BnaC01g39020D	0	0	0	0	0	-1.18454
BnaA10g20840D	0	0	0	0	0	-1.18316
BnaA10g02550D	0	0	0	0	0	-1.18168
BnaA01g27570D	0	0	0	0	0	-1.18104
BnaC07g13570D	0	0	0	0	0	-1.18093
BnaA03g40200D	0	0	0	0	0	-1.18009
BnaA05g01870D	0	0	0	0	0	-1.1798
BnaC03g63740D	0	0	0	0	0	-1.17931
BnaC05g07550D	0	0	0	0	0	-1.17831
BnaC04g00780D	0	0	0	0	0	-1.17817
BnaC06g36860D	0	0	0	0	0	-1.17809
BnaA04g05160D	0	0	0	0	0	-1.17764
BnaC03g51560D	0	0	0	0	0	-1.17758
BnaA03g39930D	0	0	0	0	0	-1.17678
BnaA10g04390D	0	0	0	0	0	-1.17639
BnaC02g46880D	0	0	0	0	0	-1.17612
BnaA01g24820D	0	0	0	0	0	-1.17594
BnaC06g15850D	0	0	0	0	0	-1.17582
BnaA09g19320D	0	0	0	0	0	-1.17577
BnaA05g25910D	0	0	0	0	0	-1.17498
BnaC04g17230D	0	0	0	0	0	-1.1748
BnaC05g25340D	0	0	0	0	0	-1.17259
BnaCnng20470D	0	0	0	0	0	-1.17172
BnaA03g25540D	0	0	0	0	0	-1.17108
BnaC08g47290D	0	0	0	0	0	-1.17098
BnaA06g30600D	0	0	0	0	0	-1.17084
BnaC07g26560D	0	0	0	0	0	-1.17045
BnaC01g22100D	0	0	0	0	0	-1.16893
BnaA09g12110D	0	0	0	0	0	-1.16876
BnaAnng16810D	0	0	0	0	0	-1.1687
BnaC03g59570D	0	0	0	0	0	-1.16744
BnaC09g05250D	0	0	0	0	-1.2449	-1.16672
BnaCnng43100D	0	0	0	0	0	-1.16672
BnaA05g07040D	0	0	0	0	0	-1.16663
BnaA08g09180D	0	0	0	0	0	-1.16628
BnaC06g10440D	0	0	0	0	0	-1.16568
BnaC06g04310D	0	0	0	0	0	-1.16555
BnaA05g10140D	0	0	0	0	0	-1.16469
BnaA02g18080D	0	0	0	0	0	-1.16389
BnaA05g28470D	0	0	0	0	0	-1.16245
BnaC07g38410D	0	0	0	0	0	-1.16174
BnaC09g10570D	0	0	0	0	0	-1.16142
BnaAnng34880D	0	0	0	0	0	-1.16077
BnaA06g23070D	0	0	0	0	0	-1.15993
BnaCnng45920D	0	0	0	0	0	-1.15988
BnaC06g01490D	0	0	0	0	0	-1.1597
BnaA03g00400D	0	0	0	0	0	-1.15873
BnaA01g09150D	0	0	0	0	0	-1.15819
BnaC06g26160D	0	0	0	0	0	-1.15799
BnaA06g28870D	0	0	0	0	0	-1.15721
BnaA03g13190D	0	0	0	0	0	-1.1572
BnaC06g22430D	0	0	0	0	0	-1.15673
BnaA04g15310D	0	0	0	0	0	-1.1565
BnaC01g01710D	0	0	0	0	0	-1.15615
BnaCnng12360D	0	0	0	0	0	-1.15515
BnaA03g29810D	0	0	0	0	0	-1.1548
BnaA09g02240D	0	0	0	0	0	-1.15448
BnaA09g00980D	0	0	0	0	0	-1.15447
BnaC02g12390D	0	0	0	0	0	-1.15428
BnaC04g38040D	0	0	0	0	0	-1.15393
BnaCnng05860D	0	0	0	0	0	-1.15299
BnaA08g17160D	0	0	0	0	0	-1.15219
BnaCnng72260D	0	0	0	0	-1.60315	-1.15204
BnaC07g15930D	0	0	0	0	0	-1.15169
BnaC05g38530D	0	0	0	0	0	-1.15147
BnaC04g00980D	0	0	0	0	0	-1.15139
BnaC06g33630D	0	0	0	0	0	-1.15137
BnaA09g16830D	0	0	0	0	0	-1.15113
BnaA09g31890D	0	0	0	0	0	-1.15106
BnaA03g35510D	0	0	0	0	0	-1.15073
BnaA07g25630D	0	0	0	0	0	-1.15056
BnaC07g39880D	0	0	0	0	0	-1.14989
BnaA09g11510D	0	0	0	0	0	-1.14965
BnaC06g10100D	0	0	0	0	0	-1.14953
BnaC07g40890D	0	0	0	0	0	-1.14864
BnaCnng69330D	0	0	0	0	0	-1.14756
BnaA07g00650D	0	0	0	0	0	-1.1471
BnaAnng37130D	0	0	0	0	0	-1.14645
BnaC09g39200D	0	0	0	0	0	-1.14526
BnaA10g16440D	0	0	0	0	0	-1.14501
BnaA08g18600D	0	0	0	0	0	-1.14458
BnaC01g13870D	0	0	0	0	0	-1.14417
BnaA10g24260D	0	0	0	0	0	-1.14392
BnaA04g24200D	0	0	0	0	0	-1.14342
BnaC05g40920D	0	0	0	0	0	-1.14321
BnaA09g37590D	0	0	0	0	0	-1.1422
BnaCnng21680D	0	0	0	0	0	-1.14085
BnaC04g25100D	0	0	0	0	0	-1.13943
BnaC03g76710D	0	0	0	0	0	-1.13877
BnaC01g25850D	0	0	0	0	0	-1.13825
BnaA06g32480D	0	0	0	0	0	-1.13822
BnaA01g03830D	0	0	0	0	0	-1.138
BnaC07g09890D	0	0	0	0	0	-1.13798
BnaC04g47450D	0	0	0	0	0	-1.13416
BnaA02g13920D	0	0	0	0	0	-1.13354
BnaC05g51090D	0	0	0	0	0	-1.13247
BnaC01g10370D	0	0	0	0	0	-1.13236
BnaC02g36370D	0	0	0	0	0	-1.132
BnaA06g03080D	0	0	0	0	0	-1.13132
BnaC01g39900D	0	0	0	0	0	-1.13118
BnaA03g48950D	0	0	0	0	0	-1.13051
BnaC09g32560D	0	0	0	0	0	-1.12986
BnaC08g07930D	0	0	0	0	0	-1.12946
BnaC06g19090D	0	0	0	0	0	-1.12927
BnaC02g04950D	0	0	0	0	0	-1.12918
BnaA03g41350D	0	0	0	0	0	-1.12873
BnaA09g02190D	0	0	0	0	0	-1.12781
BnaA07g27660D	0	0	0	0	0	-1.12739
BnaA03g01440D	0	0	0	0	0	-1.12682
BnaA09g41490D	0	0	0	0	0	-1.12653
BnaA06g18060D	0	0	0	0	0	-1.12549
BnaC09g39230D	0	0	0	0	0	-1.12517
BnaA10g25060D	0	0	0	0	0	-1.12475
BnaC05g46680D	0	0	0	0	0	-1.12304
BnaA03g00090D	0	0	0	0	0	-1.12255
BnaC05g05380D	0	0	0	0	0	-1.12232
BnaC06g40890D	0	0	0	0	0	-1.12131
BnaC08g18320D	0	0	0	0	0	-1.12046
BnaC07g22680D	0	0	0	0	0	-1.12032
BnaC03g71520D	0	0	0	0	0	-1.11978
BnaC03g49850D	0	0	0	0	0	-1.11884
BnaC07g33430D	0	0	0	0	0	-1.11835
BnaC07g44690D	0	0	0	0	0	-1.11697
BnaC08g34280D	0	0	0	0	0	-1.11687
BnaC01g22950D	0	0	0	0	0	-1.11646
BnaA09g32030D	0	0	0	0	0	-1.11639
BnaA10g04210D	0	0	0	0	0	-1.11501
BnaC03g73370D	0	0	0	0	0	-1.11352
BnaA10g14830D	0	0	0	0	0	-1.11342
BnaC06g36760D	0	0	0	0	0	-1.1129
BnaC06g36040D	0	0	0	0	0	-1.11275
BnaA05g30840D	0	0	0	0	0	-1.11162
BnaA02g02460D	0	0	0	0	0	-1.11041
BnaC08g48840D	0	0	0	0	0	-1.10889
BnaC09g49990D	0	0	0	0	0	-1.10838
BnaA03g04390D	0	0	0	0	0	-1.10833
BnaC01g44960D	0	0	0	0	0	-1.10823
BnaC05g00430D	0	0	0	0	0	-1.10777
BnaC07g30590D	0	0	0	0	0	-1.10656
BnaA09g20370D	0	0	0	0	0	-1.10641
BnaC09g01400D	0	0	0	0	0	-1.1061
BnaA10g14510D	0	0	0	0	0	-1.10601
BnaC05g01470D	0	0	0	0	0	-1.10547
BnaC09g20370D	0	0	0	0	0	-1.10519
BnaC01g04710D	0	0	0	0	0	-1.1051
BnaA09g04210D	0	0	0	0	0	-1.10489
BnaC05g31450D	0	0	0	0	0	-1.10468
BnaC09g50960D	0	0	0	0	0	-1.10371
BnaCnng74350D	0	0	0	0	0	-1.10326
BnaA01g13130D	0	0	0	0	0	-1.10289
BnaA10g28120D	0	0	0	0	0	-1.10251
BnaA05g03470D	0	0	0	0	0	-1.10162
BnaA09g12960D	0	0	0	0	0	-1.10111
BnaC07g30750D	0	0	0	0	0	-1.10082
BnaA09g53930D	0	0	0	0	0	-1.1003
BnaC01g40040D	0	0	0	0	0	-1.10026
BnaA04g28670D	0	0	0	0	0	-1.09871
BnaA01g06780D	0	0	0	0	0	-1.09704
BnaC01g01660D	0	0	0	0	0	-1.09697
BnaA05g03020D	0	0	0	0	0	-1.09674
BnaC04g14940D	0	0	0	0	0	-1.09472
BnaC05g30170D	0	0	0	0	0	-1.09448
BnaC07g32530D	0	0	0	0	0	-1.09431
BnaC09g06340D	0	0	0	0	0	-1.09424
BnaA07g38460D	0	0	0	0	0	-1.0928
BnaC05g17350D	0	0	0	0	0	-1.09122
BnaA05g37270D	0	0	0	0	0	-1.09113
BnaC05g01440D	0	0	0	0	0	-1.09093
BnaCnng05460D	0	0	0	0	0	-1.08858
BnaC06g43210D	0	0	0	0	0	-1.08843
BnaAnng28270D	0	0	0	0	0	-1.08821
BnaA08g22590D	0	0	0	0	0	-1.08808
BnaC08g42010D	0	0	0	0	0	-1.08767
BnaC03g46510D	0	0	0	0	0	-1.08679
BnaA02g05360D	0	0	0	0	0	-1.08615
BnaC03g33030D	0	0	0	0	0	-1.08586
BnaC03g75630D	0	0	0	0	0	-1.08586
BnaA01g23660D	0	0	0	0	0	-1.08574
BnaC02g05960D	0	0	0	0	0	-1.08276
BnaA10g13850D	0	0	0	0	0	-1.08219
BnaCnng19090D	0	0	0	0	0	-1.08209
BnaA03g40670D	0	0	0	0	0	-1.08199
BnaC07g03990D	0	0	0	0	0	-1.08107
BnaA02g30200D	0	0	0	0	0	-1.08105
BnaA05g19250D	0	0	0	0	0	-1.08074
BnaA09g55660D	0	0	0	0	0	-1.08036
BnaA04g08040D	0	0	0	0	0	-1.07941
BnaCnng07570D	0	0	0	0	0	-1.07917
BnaC01g01690D	0	0	0	0	0	-1.07814
BnaA03g08720D	0	0	0	0	0	-1.07698
BnaA03g54960D	0	0	0	0	0	-1.07656
BnaC05g32750D	0	0	0	0	0	-1.07636
BnaC06g30340D	0	0	0	0	0	-1.07456
BnaA08g19950D	0	0	0	0	0	-1.07437
BnaA09g09840D	0	0	0	0	0	-1.07405
BnaA08g22390D	0	0	0	0	0	-1.07341
BnaA03g31290D	0	0	0	0	0	-1.07261
BnaC09g13570D	0	0	0	0	0	-1.07203
BnaC08g40010D	0	0	0	0	0	-1.07081
BnaA05g11980D	0	0	0	0	0	-1.07073
BnaA08g01690D	0	0	0	0	0	-1.07052
BnaA01g33220D	0	0	0	0	0	-1.07027
BnaA02g17850D	0	0	0	0	0	-1.07022
BnaC05g08810D	0	0	0	0	0	-1.06937
BnaC03g21320D	0	0	0	0	0	-1.06871
BnaCnng59870D	0	0	0	0	0	-1.06842
BnaC05g08650D	0	0	0	0	0	-1.06762
BnaAnng00020D	0	0	0	0	0	-1.06737
BnaC04g56640D	0	0	0	0	0	-1.06638
BnaC07g45200D	0	0	0	0	0	-1.06561
BnaC08g14300D	0	0	0	0	0	-1.06546
BnaC02g25900D	0	0	0	0	0	-1.06371
BnaA05g34640D	0	0	0	0	0	-1.06264
BnaC02g08540D	0	0	0	0	0	-1.0625
BnaC09g19610D	0	0	0	0	0	-1.06226
BnaA02g01870D	0	0	0	0	0	-1.06212
BnaC07g45310D	0	0	0	0	0	-1.06091
BnaC03g55150D	0	0	0	0	0	-1.06059
BnaC03g70400D	0	0	0	0	0	-1.0604
BnaA01g08890D	0	0	0	0	0	-1.06029
BnaA04g16900D	0	0	0	0	0	-1.05975
BnaA08g27870D	0	0	0	0	0	-1.05908
BnaC09g16260D	0	0	0	0	0	-1.05888
BnaA05g35800D	0	0	0	0	0	-1.0583
BnaC04g39710D	0	0	0	0	0	-1.05765
BnaA10g26410D	0	0	0	0	0	-1.05673
BnaA03g57660D	0	0	0	0	0	-1.05644
BnaC03g32810D	0	0	0	0	0	-1.0556
BnaA09g20050D	0	0	0	0	0	-1.0555
BnaC08g32420D	0	0	0	0	0	-1.05497
BnaA03g16370D	0	0	0	0	0	-1.05486
BnaC05g39200D	0	0	0	0	0	-1.05436
BnaC02g16000D	0	0	0	0	0	-1.0543
BnaC02g36290D	0	0	0	0	0	-1.05406
BnaAnng05830D	0	0	0	0	0	-1.05394
BnaC07g16510D	0	0	0	0	0	-1.05348
BnaCnng07030D	0	0	0	0	0	-1.0528
BnaA01g29630D	0	0	0	0	0	-1.05273
BnaAnng40570D	0	0	0	0	0	-1.05248
BnaC01g22820D	0	0	0	0	0	-1.05238
BnaA09g03590D	0	0	0	0	0	-1.05085
BnaA09g32130D	0	0	0	0	0	-1.05084
BnaA03g21080D	0	0	0	0	0	-1.05044
BnaC01g06870D	0	0	0	0	0	-1.04997
BnaC06g03720D	0	0	0	0	0	-1.04978
BnaC03g46870D	0	0	0	0	0	-1.04949
BnaA06g40300D	0	0	0	0	0	-1.04878
BnaC05g40180D	0	0	0	0	0	-1.04834
BnaA05g18320D	0	0	0	0	0	-1.04759
BnaCnng48860D	0	0	0	0	0	-1.04709
BnaC09g37530D	0	0	0	0	0	-1.04615
BnaC08g08070D	0	0	0	0	0	-1.04582
BnaC09g54350D	0	0	0	0	0	-1.04474
BnaA03g39990D	0	0	0	0	0	-1.04456
BnaC03g04340D	0	0	0	0	0	-1.04404
BnaC01g17720D	0	0	0	0	0	-1.043
BnaC09g30700D	0	0	0	0	0	-1.04287
BnaC03g32130D	0	0	0	0	0	-1.04241
BnaA07g15470D	0	0	0	0	0	-1.03732
BnaC07g40900D	0	0	0	0	0	-1.03477
BnaA02g33970D	0	0	0	0	0	-1.0339
BnaA05g16040D	0	0	0	0	0	-1.03278
BnaC09g31160D	0	0	0	0	0	-1.03204
BnaA05g16430D	0	0	0	0	0	-1.0311
BnaAnng39250D	0	0	0	0	0	-1.02978
BnaC03g35050D	0	0	0	0	0	-1.02849
BnaA09g44170D	0	0	0	0	0	-1.02813
BnaA08g10860D	0	0	0	0	0	-1.02707
BnaA01g07910D	0	0	0	0	0	-1.02579
BnaC01g42890D	0	0	0	0	0	-1.02475
BnaC09g41680D	0	0	0	0	0	-1.02443
BnaC09g01110D	0	0	0	0	0	-1.02385
BnaC06g19080D	0	0	0	0	0	-1.02315
BnaC01g17280D	0	0	0	0	0	-1.02233
BnaA09g26580D	0	0	0	0	0	-1.02041
BnaA08g02930D	0	0	0	0	0	-1.01953
BnaC02g01730D	0	0	0	0	0	-1.0194
BnaCnng25790D	0	0	0	0	0	-1.01886
BnaA03g23340D	0	0	0	0	0	-1.01822
BnaAnng30630D	0	0	0	0	0	-1.01804
BnaA06g15560D	0	0	0	0	0	-1.0176
BnaA05g24630D	0	0	0	0	0	-1.01755
BnaA04g22200D	0	0	0	0	0	-1.01748
BnaCnng22930D	0	0	0	0	0	-1.01703
BnaC03g19960D	0	0	0	0	0	-1.01701
BnaC05g37460D	0	0	0	0	0	-1.01623
BnaC05g11560D	0	0	0	0	0	-1.01573
BnaCnng17950D	0	0	0	0	0	-1.01552
BnaA03g36950D	0	0	0	0	0	-1.01429
BnaA01g24730D	0	0	0	0	0	-1.01324
BnaA06g33730D	0	0	0	0	0	-1.01225
BnaA09g11870D	0	0	0	0	0	-1.01167
BnaC01g07810D	0	0	0	0	0	-1.01116
BnaC05g19430D	0	0	0	0	0	-1.01009
BnaC05g14070D	0	0	0	0	0	-1.00944
BnaA06g33430D	0	0	0	0	0	-1.00892
BnaC09g44830D	0	0	0	0	0	-1.00857
BnaCnng39380D	0	0	0	0	0	-1.00761
BnaA05g17210D	0	0	0	0	0	-1.00737
BnaC03g20140D	0	0	0	0	0	-1.00727
BnaC09g02700D	0	0	0	0	0	-1.00717
BnaA03g27770D	0	0	0	0	0	-1.0068
BnaCnng16050D	0	0	0	0	0	-1.00636
BnaA05g21450D	0	0	0	0	0	-1.00631
BnaC08g13230D	0	0	0	0	0	-1.00592
BnaA09g49160D	0	0	0	0	0	-1.00574
BnaA07g16890D	0	0	0	0	0	-1.00503
BnaA02g36790D	0	0	0	0	0	-1.00497
BnaA03g37240D	0	0	0	0	0	-1.00485
BnaAnng05310D	0	0	0	0	0	-1.0046
BnaA08g17790D	0	0	0	0	0	-1.00441
BnaA03g15330D	0	0	0	0	0	-1.00438
BnaC09g36800D	0	0	0	0	0	-1.00419
BnaA03g19000D	0	0	0	0	0	-1.00407
BnaA05g30530D	0	0	0	0	0	-1.00372
BnaC03g72980D	0	0	0	0	0	-1.00242
BnaA05g22760D	0	0	0	0	0	-1.00241
BnaCnng44460D	0	0	0	0	0	-1.00174
BnaA02g27300D	0	0	0	0	0	-1.00157
BnaCnng70680D	0	0	0	0	0	-1.0012
BnaA07g30180D	0	0	0	0	-1.68366	-5.33144
BnaC08g37340D	0	0	0	0	-1.7887	-5.0718
BnaA03g19290D	0	0	0	0	-1.69219	-5.02525
BnaA09g33600D	0	0	0	0	-1.34328	-4.94801
BnaC03g03510D	0	0	0	0	-3.24248	-4.92391
BnaC09g10140D	0	0	0	0	0	-4.89268
BnaC06g09380D	0	0	0	0	-1.38068	-4.23508
BnaAnng27090D	0	0	0	0	0	-4.12725
BnaA09g26470D	0	0	0	0	0	-3.79814
BnaA08g15350D	0	0	0	0	-1.06388	-3.66133
BnaA04g03900D	0	0	0	0	0	-3.50361
BnaA02g20850D	0	0	0	0	-1.89214	-3.48263
BnaA02g37020D	0	0	0	0	0	-3.4203
BnaC01g38800D	0	0	0	0	-2.28621	-3.36518
BnaCnng40440D	0	0	0	0	0	-3.09128
BnaA02g28980D	0	0	0	0	0	-3.01452
BnaA08g25590D	0	0	0	0	0	-3.00821
BnaC03g67980D	0	0	0	0	0	-2.97137
BnaC01g20890D	0	0	0	0	0	-2.83935
BnaA03g36080D	0	0	0	0	0	-2.83788
BnaC05g37000D	0	0	0	0	0	-2.62614
BnaA09g13300D	0	0	0	-2.15579	-1.38035	-2.61259
BnaA05g18490D	0	0	0	0	0	-2.49816
BnaAnng10720D	0	0	0	0	0	-2.23385
BnaC07g47480D	0	0	0	0	0	-2.13505
BnaA01g32760D	0	0	0	0	0	-2.05823
BnaC06g12920D	0	0	0	0	-1.27585	-2.05416
BnaA07g38680D	0	0	0	0	0	-1.33162
BnaA02g30740D	0	0	0	0	0	-1.1802
BnaA03g59850D	0	0	0	0	0	-1.14361
BnaC01g40400D	0	0	0	0	0	-1.09474
BnaAnng01300D	0	0	0	0	-3.41646	-8.24528
BnaC03g16990D	0	0	0	0	-2.58685	-5.99779
BnaA01g13110D	0	0	0	0	-2.82532	-5.93264
BnaA01g02250D	0	0	0	0	-1.24397	-5.74594
BnaC04g00090D	0	0	0	0	-1.43491	-5.58769
BnaC03g32510D	0	0	0	0	-1.81354	-5.53581
BnaA03g01070D	0	-2.1899	0	0	-3.52905	-5.52239
BnaA03g59140D	0	0	0	0	-2.23107	-5.4924
BnaCnng07700D	0	0	0	0	-1.82289	-5.29758
[truncated: 133 more rows]

## Sheet: down-regulated PC
Bna_gene_id	UP	PCLFD2	PCLFD5	PCLFD10	PCLFD20	PCLFD30
BnaA06g26510D	0	0	0	0	-3.19155	-1.64133
BnaAnng31630D	0	0	0	0	-3.29166	-2.32521
BnaCnng73390D	0	0	0	0	-2.7044	-3.44581
BnaC01g17020D	0	0	0	0	-1.95018	0
BnaC05g37800D	0	0	0	0	-2.79091	0
BnaA06g33560D	0	0	0	0	-3.55348	0
BnaC05g06220D	0	0	0	0	-1.36714	0
BnaA05g28390D	0	0	0	0	-1.4606	0
BnaA02g15820D	0	0	0	0	-1.47933	0
BnaCnng36390D	0	0	0	0	-1.48329	0
BnaA02g18700D	0	0	0	0	-1.73202	0
BnaA05g34410D	0	0	0	0	-1.76335	0
BnaA07g16420D	0	0	0	0	-1.78263	0
BnaC03g03520D	0	0	0	0	-1.92519	0
BnaA05g24100D	0	0	0	0	-2.69799	0
BnaCnng39740D	0	0	0	0	-2.70143	0
BnaC03g22990D	0	0	0	0	-2.73649	0
BnaAnng24430D	0	0	0	0	-2.79374	0
BnaC03g23030D	0	0	0	0	-3.71134	0
BnaC03g18390D	0	0	0	0	-2.10578	-2.45796
BnaA03g02510D	0	0	0	0	-1.61095	-1.6208
BnaC07g36760D	0	0	0	0	-2.24447	-1.80835
BnaC03g01430D	0	0	0	0	-2.59716	-1.90971
BnaC08g27250D	0	0	0	0	0	-2.0074
BnaC09g49910D	0	0	0	0	0	-2.70279
BnaA07g22620D	0	0	0	0	0	-1.30754
BnaC02g00740D	0	0	0	0	0	-1.33283
BnaA09g01040D	0	0	0	0	0	-1.35632
BnaA01g11770D	0	0	0	0	0	-1.4716
BnaC09g01520D	0	0	0	0	0	-1.48884
BnaA06g01680D	0	0	0	0	0	-1.52952
BnaC03g69350D	0	0	0	0	0	-1.54463
BnaA05g11360D	0	0	0	0	0	-1.61554
BnaC09g01160D	0	0	0	0	0	-1.65786
BnaCnng24140D	0	0	0	0	0	-1.66748
BnaA08g01590D	0	0	0	0	0	-1.72476
BnaA02g34030D	0	0	0	0	0	-1.82124
BnaC03g23020D	0	0	0	0	0	-3.71069
BnaC09g45170D	0	0	0	0	-2.96039	-2.94408
BnaA03g02500D	0	0	0	0	-3.17502	-3.48239
BnaA07g33960D	0	0	0	0	-4.36306	-2.37068
BnaCnng30450D	0	-1.96284	-1.81152	-1.88814	-2.68506	-2.59174
BnaA02g20850D	0	0	0	0	-2.76127	-2.15525
BnaA03g01070D	0	0	0	0	-3.10824	-2.28371
BnaC03g16990D	0	0	0	0	-3.39464	-2.46586
BnaC07g46910D	0	0	0	0	-3.44846	-2.28695
BnaA01g06750D	0	0	0	0	-3.469	-1.68432
BnaC03g03510D	0	0	0	0	-3.67062	-3.25022
BnaC02g00130D	0	0	-2.83052	0	-2.84386	-2.93908
BnaA03g19290D	0	0	0	0	-2.99616	-3.68003
BnaA05g18490D	0	0	0	0	-1.34964	0
BnaA08g25590D	0	0	0	0	-1.4101	0
BnaCnng58860D	0	0	0	0	-1.46653	0
BnaA06g15550D	0	0	0	0	-1.48785	0
BnaAnng27090D	0	0	0	0	-1.56331	0
BnaC06g22480D	0	0	0	0	-1.84291	0
BnaA06g02680D	0	0	0	0	-1.88918	0
BnaA02g30740D	0	0	0	0	-1.8996	0
BnaCnng07700D	0	0	0	0	-2.03314	0
BnaA09g12650D	0	0	0	0	-2.06912	0
BnaA03g59850D	0	0	0	0	-2.24575	0
BnaC01g20890D	0	0	0	0	-2.57099	0
BnaAnng01300D	0	0	0	0	-4.12085	0
BnaA05g14440D	0	0	0	0	-1.31577	0
BnaC01g42990D	0	0	0	0	-1.32913	0
BnaA09g20060D	0	0	0	0	-1.35248	0
BnaA04g12980D	0	0	0	0	-1.35565	0
BnaA02g37020D	0	0	0	0	-1.36424	0
BnaA08g17420D	0	0	0	0	-1.38079	0
BnaA04g17220D	0	0	0	0	-1.39463	0
BnaA04g03900D	0	0	0	0	-1.39868	0
BnaA08g15350D	0	0	0	0	-1.40313	0
BnaC04g00090D	0	0	0	0	-1.42099	0
BnaA10g07360D	0	0	0	0	-1.42698	0
BnaCnng40440D	0	0	0	0	-1.42753	0
BnaA04g17070D	0	0	0	0	-1.43433	0
BnaA09g30050D	0	0	0	0	-1.43511	0
BnaAnng08970D	0	0	0	0	-1.44368	0
BnaC08g14510D	0	0	0	0	-1.44485	0
BnaCnng01720D	0	0	0	0	-1.45661	0
BnaCnng59680D	0	0	0	0	-1.46302	0
BnaA09g04320D	0	0	0	0	-1.46622	0
BnaCnng38030D	0	0	0	0	-1.47204	0
BnaA03g36080D	0	0	0	0	-1.47372	0
BnaAnng10720D	0	0	0	0	-1.47416	0
BnaA01g35070D	0	0	0	0	-1.47921	0
BnaC06g12920D	0	0	0	0	-1.49567	0
BnaA09g16990D	0	0	0	0	-1.50595	0
BnaA03g52940D	0	0	0	0	-1.5122	0
BnaA02g28980D	0	0	0	0	-1.51297	0
BnaC01g30750D	0	0	0	0	-1.51899	0
BnaA05g12280D	0	0	0	0	-1.53399	0
BnaC04g19370D	0	0	0	0	-1.54035	0
BnaC07g26010D	0	0	0	0	-1.54164	0
BnaA01g04640D	0	0	0	0	-1.54644	0
BnaC09g52180D	0	0	0	0	-1.5512	0
BnaA03g58390D	0	0	0	0	-1.55418	0
BnaAnng25560D	0	0	0	0	-1.58415	0
BnaC05g36540D	0	0	0	0	-1.58483	0
BnaA08g16370D	0	0	0	0	-1.59723	0
BnaC08g34050D	0	0	0	0	-1.59842	0
BnaC03g60270D	0	0	0	0	-1.60404	0
BnaA03g53460D	0	0	0	0	-1.61343	0
BnaA09g20070D	0	0	0	0	-1.62192	0
BnaA09g33600D	0	0	0	0	-1.6231	0
BnaC07g45430D	0	0	0	0	-1.63602	0
BnaC03g33650D	0	0	0	0	-1.63607	0
BnaCnng38150D	0	0	0	0	-1.64622	0
BnaC09g32640D	0	0	0	0	-1.65902	0
BnaC05g18500D	0	0	0	0	-1.65986	0
BnaC08g37340D	0	0	0	0	-1.66843	0
BnaC02g39100D	0	0	0	0	-1.67446	0
BnaC02g08600D	0	0	0	0	-1.6766	0
BnaC05g39020D	0	0	0	0	-1.67749	0
BnaCnng58640D	0	0	0	0	-1.68283	0
BnaA02g22470D	0	0	0	0	-1.70757	0
BnaA01g35060D	0	0	0	0	-1.71772	0
BnaC09g50190D	0	0	0	0	-1.71834	0
BnaA06g39280D	0	0	0	0	-1.72942	0
BnaA07g12830D	0	0	0	0	-1.73864	0
BnaC04g46980D	0	0	0	0	-1.75653	0
BnaC01g03410D	0	0	0	0	-1.80389	0
BnaCnng07050D	0	0	0	0	-1.81284	0
BnaA09g26470D	0	0	0	0	-1.82597	0
BnaC05g46960D	0	0	0	0	-1.83285	0
BnaA04g11490D	0	0	0	0	-1.83398	0
BnaA10g01190D	0	0	0	0	-1.84197	0
BnaA07g30180D	0	0	0	0	-1.84243	0
BnaCnng63480D	0	0	0	0	-1.85286	0
BnaA02g18750D	0	0	0	0	-1.85632	0
BnaA01g32760D	0	0	0	0	-1.86111	0
BnaC05g42780D	0	0	0	0	-1.89034	0
BnaA07g11370D	0	0	0	0	-1.97539	0
BnaC08g32450D	0	0	0	0	-1.98565	0
BnaA04g23210D	0	0	0	0	-1.99877	0
BnaA02g15980D	0	0	0	0	-2.00317	0
BnaC01g38800D	0	0	0	0	-2.03665	0
BnaA06g26560D	0	0	0	0	-2.04452	0
BnaC03g14470D	0	0	0	0	-2.05295	0
BnaC07g03950D	0	0	0	0	-2.05521	0
BnaC07g47480D	0	0	0	0	-2.09767	0
BnaC03g61550D	0	0	0	0	-2.11128	0
BnaA07g30160D	0	0	0	0	-2.12139	0
BnaA02g23460D	0	0	0	0	-2.12706	0
BnaA09g56100D	0	0	0	0	-2.15945	0
BnaA09g52510D	0	0	0	0	-2.17951	0
BnaA06g08140D	0	0	0	0	-2.184	0
BnaA06g17510D	0	0	0	0	-2.31275	0
BnaC05g47720D	0	0	0	0	-2.34174	0
BnaA01g02210D	0	0	0	0	-2.42375	0
BnaC01g08130D	0	0	0	0	-2.49152	0
BnaCnng62910D	0	0	0	0	-2.50319	0
BnaC03g32510D	0	0	0	0	-2.51544	0
BnaA07g05380D	0	0	0	0	-2.59946	0
BnaC03g67980D	0	0	0	0	-2.66589	0
BnaA09g10050D	0	0	0	0	-2.68987	0
BnaA01g14450D	0	0	0	0	-2.69753	0
BnaC02g39030D	0	0	0	0	-2.72841	0
BnaC09g06210D	0	0	0	0	-2.8032	0
BnaC06g05990D	0	0	0	0	-2.8539	0
BnaC09g10140D	0	0	0	0	-2.86509	0
BnaA05g24610D	0	0	0	0	-3.06828	0
BnaA02g34510D	0	0	0	0	-3.51433	0
BnaC05g37000D	0	0	0	0	-3.768	0
BnaC07g42500D	0	0	0	0	-1.74912	-1.7325
BnaC06g26300D	0	0	0	0	-1.87076	-2.41694
BnaA02g28200D	0	0	0	0	-1.87297	-1.71596
BnaC09g52640D	0	0	0	0	-2.31675	-1.76747
BnaC09g04840D	0	0	0	0	-1.53308	-1.48044
BnaC06g09380D	0	0	0	0	-1.56592	-1.50497
BnaC09g30560D	0	0	0	0	-1.57299	-1.68585
BnaC06g04530D	0	0	0	0	-1.60945	-1.96472
BnaA05g19400D	0	0	0	0	-1.68703	-1.69536
BnaA06g06510D	0	0	0	0	-1.75789	-1.80282
BnaA03g00870D	0	0	0	0	-1.78272	-2.20797
BnaA03g00800D	0	0	0	0	-1.78819	-1.86217
BnaA05g25240D	0	0	0	0	-1.9258	-1.4594
BnaC09g10680D	0	0	0	0	-2.01329	-1.48279
BnaA03g08110D	0	0	0	0	-2.03374	-1.8665
BnaCnng01740D	0	0	0	0	-2.06271	-1.67256
BnaC04g34320D	0	0	0	0	-2.09417	-2.10923
BnaA01g02250D	0	0	0	0	-2.19105	-1.39416
BnaA03g59140D	0	0	0	0	-2.19365	-1.65561
BnaC04g43390D	0	0	0	0	-2.20788	-2.41996
BnaC03g33190D	0	0	0	0	-2.21009	-2.18646
BnaC01g13480D	0	0	0	0	-2.23868	-1.76335
BnaA07g25540D	0	0	0	0	-2.2427	-1.7032
BnaA04g06980D	0	0	0	0	-2.35526	-1.59665
BnaA03g14030D	0	0	0	0	-2.40136	-1.7018
BnaC07g02460D	0	0	0	0	-2.50065	-1.62432
BnaA01g13110D	0	0	0	0	-2.54389	-1.61005
BnaA05g37400D	0	0	0	0	-2.54813	-1.8499
BnaA10g09490D	0	0	0	0	-2.67237	-2.00325
BnaA09g13300D	0	0	-1.99532	0	-1.73977	-2.11083
BnaUnng03570D	0	0	0	0	-2.69003	-1.44649
BnaC07g09400D	0	0	0	0	0	-1.32641
BnaCnng18100D	0	0	0	0	0	-1.56792
BnaC04g14700D	0	0	0	0	0	-1.76187
BnaA02g23670D	0	0	0	0	0	-2.51274
BnaA05g28870D	0	0	0	0	0	-1.43173
BnaA02g27890D	0	0	0	0	0	-1.45273
BnaC08g35830D	0	0	0	0	0	-1.48024
BnaC04g14770D	0	0	0	0	0	-1.51503
BnaA04g02820D	0	0	0	0	0	-1.65104
BnaA02g00670D	0	0	0	0	0	-1.66676
BnaA10g25430D	0	0	0	0	0	-1.84285
BnaC06g23520D	0	0	0	0	0	-1.84516
BnaA07g38680D	0	0	0	0	0	-1.85889
BnaC01g40400D	0	0	0	0	0	-1.89241
BnaA06g36250D	0	0	0	0	0	-2.04949
BnaC03g11850D	0	0	0	0	0	-2.26675

## Sheet: down-regulated PC specific
Bna_gene_id	UP	PCLFD2	PCLFD5	PCLFD10	PCLFD20	PCLFD30
BnaA06g26510D	0	0	0	0	-3.19155	-1.64133
BnaAnng31630D	0	0	0	0	-3.29166	-2.32521
BnaCnng73390D	0	0	0	0	-2.7044	-3.44581
BnaC01g17020D	0	0	0	0	-1.95018	0
BnaC05g37800D	0	0	0	0	-2.79091	0
BnaA06g33560D	0	0	0	0	-3.55348	0
BnaC05g06220D	0	0	0	0	-1.36714	0
BnaA05g28390D	0	0	0	0	-1.4606	0
BnaA02g15820D	0	0	0	0	-1.47933	0
BnaCnng36390D	0	0	0	0	-1.48329	0
BnaA02g18700D	0	0	0	0	-1.73202	0
BnaA05g34410D	0	0	0	0	-1.76335	0
BnaA07g16420D	0	0	0	0	-1.78263	0
BnaC03g03520D	0	0	0	0	-1.92519	0
BnaA05g24100D	0	0	0	0	-2.69799	0
BnaCnng39740D	0	0	0	0	-2.70143	0
BnaC03g22990D	0	0	0	0	-2.73649	0
BnaAnng24430D	0	0	0	0	-2.79374	0
BnaC03g23030D	0	0	0	0	-3.71134	0
BnaC03g18390D	0	0	0	0	-2.10578	-2.45796
BnaA03g02510D	0	0	0	0	-1.61095	-1.6208
BnaC07g36760D	0	0	0	0	-2.24447	-1.80835
BnaC03g01430D	0	0	0	0	-2.59716	-1.90971
BnaC08g27250D	0	0	0	0	0	-2.0074
BnaC09g49910D	0	0	0	0	0	-2.70279
BnaA07g22620D	0	0	0	0	0	-1.30754
BnaC02g00740D	0	0	0	0	0	-1.33283
BnaA09g01040D	0	0	0	0	0	-1.35632
BnaA01g11770D	0	0	0	0	0	-1.4716
BnaC09g01520D	0	0	0	0	0	-1.48884
BnaA06g01680D	0	0	0	0	0	-1.52952
BnaC03g69350D	0	0	0	0	0	-1.54463
BnaA05g11360D	0	0	0	0	0	-1.61554
BnaC09g01160D	0	0	0	0	0	-1.65786
BnaCnng24140D	0	0	0	0	0	-1.66748
BnaA08g01590D	0	0	0	0	0	-1.72476
BnaA02g34030D	0	0	0	0	0	-1.82124
BnaC03g23020D	0	0	0	0	0	-3.71069

## Sheet: down-regulated PI specific
Bna_gene_id	UP	PILFD2	PILFD5	PILFD10	PILFD20	PILFD30
BnaC07g36770D	0	0	0	0	0	-4.14231
BnaC07g22770D	0	0	0	0	0	-3.86894
BnaA07g24460D	0	0	0	0	0	-3.85654
BnaA09g33610D	0	0	0	0	0	-3.84634
BnaC06g06610D	0	0	0	0	0	-3.70183
BnaC05g15230D	0	0	0	0	0	-3.60099
BnaC01g01500D	0	0	0	0	0	-3.49399
BnaA07g24790D	0	0	0	0	0	-3.49249
BnaA06g23270D	0	0	0	0	0	-3.4494
BnaAnng37680D	0	0	0	0	0	-3.43913
BnaA08g04980D	0	0	0	0	0	-3.35696
BnaA03g11840D	0	0	0	0	0	-3.2748
BnaA03g51820D	0	0	0	0	0	-3.12708
BnaC05g34410D	0	0	0	0	0	-3.10065
BnaA04g16920D	0	0	0	0	0	-3.04152
BnaA01g37010D	0	0	0	0	0	-3.03085
BnaA05g18690D	0	0	0	0	0	-3.01264
BnaC05g49600D	0	0	0	0	0	-3.01096
BnaA10g01510D	0	0	0	0	0	-2.98732
BnaC05g46390D	0	0	0	0	0	-2.97781
BnaC04g05720D	0	0	0	0	0	-2.96614
BnaA05g00610D	0	0	0	0	0	-2.89761
BnaA08g21960D	0	0	0	0	0	-2.86585
BnaA07g11930D	0	0	0	0	-1.84275	-2.86545
BnaAnng13950D	0	0	0	0	0	-2.85287
BnaCnng45670D	0	0	0	0	0	-2.81158
BnaA10g12540D	0	0	0	0	0	-2.80815
BnaC01g14580D	0	0	0	0	0	-2.80223
BnaC01g03470D	0	0	0	0	0	-2.80202
BnaC02g42140D	0	0	0	0	0	-2.77137
BnaC06g30920D	0	0	0	0	0	-2.76081
BnaC08g28170D	0	0	0	0	0	-2.74316
BnaA09g05570D	0	0	0	0	0	-2.7304
BnaA01g00690D	0	0	0	0	0	-2.69199
BnaA04g16160D	0	0	0	0	0	-2.68999
BnaC02g39370D	0	0	0	0	0	-2.68209
BnaA08g13200D	0	0	0	0	0	-2.67827
BnaAnng27140D	0	0	0	0	0	-2.67636
BnaA08g26110D	0	0	0	0	0	-2.65248
BnaC03g59010D	0	0	0	0	0	-2.65038
BnaC07g15280D	0	0	0	0	0	-2.60373
BnaA06g31250D	0	0	0	0	0	-2.58947
BnaCnng62690D	0	0	0	0	0	-2.57434
BnaC04g52190D	0	0	0	0	0	-2.52855
BnaA01g34970D	0	0	0	0	-1.18589	-2.52111
BnaC07g25390D	0	0	0	0	0	-2.51238
BnaC07g18940D	0	0	0	0	0	-2.50674
BnaC01g11750D	0	0	0	0	0	-2.50246
BnaA09g28990D	0	0	0	0	-1.32351	-2.48321
BnaC04g44870D	0	0	0	0	0	-2.4423
BnaA04g27870D	0	0	0	0	0	-2.44105
BnaA09g47290D	0	0	0	0	0	-2.43816
BnaA04g20380D	0	0	0	0	0	-2.42717
BnaA01g26430D	0	0	0	0	0	-2.38425
BnaC07g35800D	0	0	0	0	0	-2.36465
BnaC09g46170D	0	0	0	0	0	-2.3316
BnaC03g65700D	0	0	0	0	0	-2.31417
BnaC02g11560D	0	0	0	0	0	-2.3092
BnaC01g08910D	0	0	0	0	0	-2.30829
BnaA09g30120D	0	0	0	0	0	-2.23442
BnaC03g78090D	0	0	0	0	0	-2.21263
BnaC08g26410D	0	0	0	0	0	-2.2075
BnaAnng09460D	0	0	0	0	0	-2.19418
BnaCnng61850D	0	0	0	0	0	-2.1776
BnaA08g04950D	0	0	0	0	0	-2.17281
BnaC02g18120D	0	0	0	0	0	-2.16659
BnaA06g14510D	0	0	0	0	0	-2.164
BnaA01g37200D	0	0	0	0	0	-2.14753
BnaC07g36640D	0	0	0	0	0	-2.1418
BnaAnng01940D	0	0	0	0	0	-2.14132
BnaA03g10230D	0	0	0	0	0	-2.1037
BnaC07g48400D	0	0	0	0	0	-2.09762
BnaA05g19720D	0	0	0	0	0	-2.06745
BnaA08g05350D	0	0	0	0	0	-2.04704
BnaA06g22560D	0	0	0	0	0	-2.0408
BnaCnng68450D	0	0	0	0	0	-2.03967
BnaC04g56200D	0	0	0	0	0	-2.03843
BnaA03g45520D	0	0	0	0	0	-2.02674
BnaC03g61940D	0	0	0	0	0	-2.02242
BnaC02g16350D	0	0	0	0	0	-2.0139
BnaA08g21920D	0	0	0	0	0	-2.00993
BnaA05g03750D	0	0	0	0	0	-1.99348
BnaC01g41150D	0	0	0	0	0	-1.98154
BnaC09g48680D	0	0	0	0	0	-1.9563
BnaC08g18330D	0	0	0	0	0	-1.94681
BnaA02g08160D	0	0	0	0	0	-1.9323
BnaC03g14930D	0	0	0	0	0	-1.92935
BnaC08g47390D	0	0	0	0	0	-1.89821
BnaC04g05470D	0	0	0	0	0	-1.88988
BnaC08g31950D	0	0	0	0	0	-1.88132
BnaC05g34400D	0	0	0	0	0	-1.85998
BnaA05g26420D	0	0	0	0	0	-1.85721
BnaC03g14450D	0	0	0	0	0	-1.85577
BnaA10g24060D	0	0	0	0	0	-1.85062
BnaC09g32850D	0	0	0	0	0	-1.83459
BnaC06g17690D	0	0	0	0	0	-1.83229
BnaA01g00670D	0	0	0	0	0	-1.81838
BnaA10g00970D	0	0	0	0	0	-1.80566
BnaA10g05120D	0	0	0	0	0	-1.79827
BnaA03g48600D	0	0	0	0	0	-1.78345
BnaC08g11780D	0	0	0	0	0	-1.782
BnaA05g23260D	0	0	0	0	0	-1.74784
BnaA08g04230D	0	0	0	0	0	-1.74771
BnaA01g35000D	0	0	0	0	0	-1.74357
BnaC08g39110D	0	0	0	0	0	-1.73868
BnaC02g23440D	0	0	0	0	0	-1.73726
BnaA07g07560D	0	0	0	0	0	-1.73111
BnaA09g05360D	0	0	0	0	0	-1.72436
BnaA06g02010D	0	0	0	0	0	-1.72351
BnaA08g31150D	0	0	0	0	0	-1.71728
BnaA05g01480D	0	0	0	0	0	-1.71551
BnaA03g28510D	0	0	0	0	0	-1.70953
BnaC06g21530D	0	0	0	0	0	-1.70949
BnaA01g37180D	0	0	0	0	0	-1.6936
BnaA10g30410D	0	0	0	0	0	-1.69136
BnaA01g30340D	0	0	0	0	0	-1.68752
BnaA06g28320D	0	0	0	0	0	-1.68146
BnaA10g14220D	0	0	0	0	0	-1.67935
BnaA07g28200D	0	0	0	0	0	-1.67484
BnaA05g24200D	0	0	0	0	0	-1.65201
BnaCnng21080D	0	0	0	0	0	-1.65056
BnaA05g06090D	0	0	0	0	0	-1.64731
BnaC06g15910D	0	0	0	0	0	-1.64225
BnaC05g30560D	0	0	0	0	0	-1.62804
BnaC04g06690D	0	0	0	0	0	-1.61993
BnaA10g05030D	0	0	0	0	0	-1.61311
BnaC08g42910D	0	0	0	0	0	-1.60276
BnaA06g40430D	0	0	0	0	0	-1.60243
BnaC04g51910D	0	0	0	0	0	-1.59967
BnaA03g45390D	0	0	0	0	0	-1.5976
BnaA08g25410D	0	0	0	0	0	-1.59648
BnaC08g32290D	0	0	0	0	0	-1.58184
BnaC07g29570D	0	0	0	0	0	-1.57742
BnaC06g24400D	0	0	0	0	0	-1.56927
BnaA04g12570D	0	0	0	0	0	-1.56756
BnaA02g06580D	0	0	0	0	0	-1.56646
BnaC03g34980D	0	0	0	0	0	-1.55456
BnaA01g36880D	0	0	0	0	0	-1.52534
BnaC07g15170D	0	0	0	0	0	-1.51187
BnaC06g29080D	0	0	0	0	0	-1.5041
BnaC02g13790D	0	0	0	0	0	-1.50125
BnaC08g15380D	0	0	0	0	0	-1.4997
BnaA03g53100D	0	0	0	0	0	-1.49733
BnaC09g13080D	0	0	0	0	0	-1.48904
BnaA02g05540D	0	0	0	0	0	-1.46669
BnaC06g16270D	0	0	0	0	0	-1.46407
BnaA08g29500D	0	0	0	0	0	-1.45421
BnaC09g41090D	0	0	0	0	0	-1.44846
BnaA05g33740D	0	0	0	0	0	-1.43908
BnaC03g75690D	0	0	0	0	0	-1.43271
BnaC05g47610D	0	0	0	0	0	-1.42728
BnaA02g01650D	0	0	0	0	0	-1.42266
BnaA07g02730D	0	0	0	0	0	-1.42176
BnaA10g23380D	0	0	0	0	0	-1.42103
BnaA05g33180D	0	0	0	0	0	-1.41858
BnaA09g22890D	0	0	0	0	0	-1.41853
BnaC03g22680D	0	0	0	0	0	-1.40978
BnaC01g32800D	0	0	0	0	0	-1.40898
BnaA04g18330D	0	0	0	0	0	-1.40848
BnaA06g39210D	0	0	0	0	0	-1.40782
BnaAnng21020D	0	0	0	0	0	-1.39455
BnaA05g27100D	0	0	0	0	0	-1.39283
BnaAnng06240D	0	0	0	0	0	-1.39173
BnaA09g12410D	0	0	0	0	0	-1.3866
BnaA01g34730D	0	0	0	0	0	-1.38552
BnaC01g38150D	0	0	0	0	0	-1.37315
BnaA08g28590D	0	0	0	0	0	-1.37026
BnaAnng19200D	0	0	0	0	0	-1.36992
BnaA08g15260D	0	0	0	0	0	-1.35736
BnaA05g12950D	0	0	0	0	0	-1.3564
BnaA06g11890D	0	0	0	0	0	-1.35216
BnaC08g48530D	0	0	0	0	0	-1.344
BnaC09g15370D	0	0	0	0	0	-1.33747
BnaCnng76220D	0	0	0	0	0	-1.33727
BnaC08g15340D	0	0	0	0	0	-1.33602
BnaC05g44310D	0	0	0	0	0	-1.33269
BnaA09g07690D	0	0	0	0	0	-1.33121
BnaC04g10770D	0	0	0	0	0	-1.32474
BnaA07g28390D	0	0	0	0	0	-1.32435
BnaA07g16710D	0	0	0	0	0	-1.3241
BnaC07g30960D	0	0	0	0	0	-1.31761
BnaA09g25030D	0	0	0	0	0	-1.31201
BnaCnng45710D	0	0	0	0	0	-1.31199
BnaA07g01210D	0	0	0	0	0	-1.31186
BnaC02g35940D	0	0	0	0	0	-1.30639
BnaA08g21600D	0	0	0	0	0	-1.28668
BnaC09g41840D	0	0	0	0	0	-1.28362
BnaA06g21680D	0	0	0	0	0	-1.28267
BnaA08g16180D	0	0	0	0	0	-1.28066
BnaCnng55470D	0	0	0	0	0	-1.27826
BnaC01g11650D	0	0	0	0	0	-1.27694
BnaA05g04350D	0	0	0	0	0	-1.27552
BnaA07g38790D	0	0	0	0	0	-1.27434
BnaA04g24360D	0	0	0	0	0	-1.27362
BnaC03g19000D	0	0	0	0	0	-1.25572
BnaC08g22930D	0	0	0	0	0	-1.25088
BnaAnng10570D	0	0	0	0	0	-1.24851
BnaC08g05450D	0	0	0	0	0	-1.248
BnaC03g71040D	0	0	0	0	0	-1.24006
BnaC06g22380D	0	0	0	0	0	-1.23795
BnaC02g48740D	0	0	0	0	0	-1.23289
BnaA03g25790D	0	0	0	0	0	-1.23225
BnaC01g22400D	0	0	0	0	0	-1.23187
BnaCnng04610D	0	0	0	0	0	-1.231
BnaC04g28400D	0	0	0	0	0	-1.2273
BnaC07g47240D	0	0	0	0	0	-1.226
BnaC05g03040D	0	0	0	0	0	-1.22574
BnaA03g06030D	0	0	0	0	0	-1.22322
BnaC06g30180D	0	0	0	0	0	-1.22102
BnaC07g35270D	0	0	0	0	0	-1.21539
BnaC03g25140D	0	0	0	0	0	-1.21462
BnaA01g36300D	0	0	0	0	0	-1.21104
BnaC04g23100D	0	0	0	0	0	-1.20657
BnaC09g00690D	0	0	0	0	0	-1.18272
BnaC06g37990D	0	0	0	0	0	-1.18204
BnaA04g05380D	0	0	0	0	0	-1.18102
BnaA07g32310D	0	0	0	0	0	-1.17873
BnaC07g41980D	0	0	0	0	0	-1.16626
BnaA10g24080D	0	0	0	0	0	-1.15582
BnaA07g20280D	0	0	0	0	0	-1.15304
BnaC03g72370D	0	0	0	0	0	-1.14927
BnaA01g34740D	0	0	0	0	0	-1.14822
BnaA01g02060D	0	0	0	0	0	-1.14465
BnaC03g52570D	0	0	0	0	0	-1.14357
BnaC08g20880D	0	0	0	0	0	-1.14059
BnaA01g08410D	0	0	0	0	0	-1.13741
BnaA09g07820D	0	0	0	0	0	-1.13356
BnaA02g14850D	0	0	0	0	0	-1.13004
BnaA05g25030D	0	0	0	0	0	-1.12562
BnaAnng33720D	0	0	0	0	0	-1.12561
BnaA08g25730D	0	0	0	0	0	-1.12203
BnaC03g59440D	0	0	0	0	0	-1.12029
BnaA03g48610D	0	0	0	0	0	-1.1192
BnaC02g05940D	0	0	0	0	0	-1.11355
BnaAnng40400D	0	0	0	0	0	-1.11286
BnaA09g07170D	0	0	0	0	0	-1.1126
BnaC04g09850D	0	0	0	0	0	-1.10496
BnaC03g60710D	0	0	0	0	0	-1.10378
BnaA09g45540D	0	0	0	0	0	-1.08536
BnaC05g15170D	0	0	0	0	0	-1.08489
BnaA02g32550D	0	0	0	0	0	-1.08237
BnaA07g19460D	0	0	0	0	0	-1.07607
BnaC03g70570D	0	0	0	0	0	-1.07555
BnaCnng63870D	0	0	0	0	0	-1.0704
BnaA09g44980D	0	0	0	0	0	-1.06824
BnaA04g20060D	0	0	0	0	0	-1.06724
BnaA10g24600D	0	0	0	0	0	-1.06444
BnaA07g10140D	0	0	0	0	0	-1.06221
BnaA01g03040D	0	0	0	0	0	-1.05638
BnaC08g20070D	0	0	0	0	0	-1.05499
BnaA08g05990D	0	0	0	0	0	-1.05344
BnaA02g13050D	0	0	0	0	0	-1.04457
BnaC09g45450D	0	0	0	0	0	-1.035
BnaA04g01110D	0	0	0	0	0	-1.03495
BnaC03g65070D	0	0	0	0	0	-1.03067
BnaC03g39300D	0	0	0	0	0	-1.02749
BnaA03g15800D	0	0	0	0	0	-1.02289
BnaA02g19320D	0	0	0	0	0	-1.01451
BnaC07g37780D	0	0	0	0	0	-1.00647
BnaC07g27160D	0	-3.88239	0	0	-1.8856	-6.15886
BnaA03g36400D	0	0	0	0	0	-4.93784
BnaCnng67130D	0	0	0	0	0	-4.70653
BnaA02g12290D	0	0	0	0	-1.45481	-4.59236
BnaA03g13530D	0	0	0	0	0	-4.54144
BnaC05g09040D	0	0	0	0	0	-4.51996
BnaA08g01090D	0	0	0	0	0	-4.46099
BnaC07g09260D	0	0	0	0	0	-4.43548
BnaC04g45080D	0	0	0	0	0	-4.37976
BnaAnng00920D	0	0	0	0	0	-4.36243
BnaC07g45370D	0	0	0	0	-1.72783	-4.29506
BnaC03g53210D	0	0	0	0	0	-4.27887
BnaC04g40570D	0	0	0	0	0	-4.26519
BnaC09g03730D	0	0	0	0	0	-4.26409
BnaC02g02350D	0	-1.6829	-1.62806	0	0	-4.17507
BnaC04g14070D	0	0	0	0	-1.65382	-4.17058
BnaA05g23460D	0	0	0	0	0	-4.16067
BnaC02g35830D	0	0	0	0	-2.02654	-4.1384
BnaC06g33610D	0	0	0	0	0	-4.11652
BnaAnng30540D	0	0	0	0	0	-4.10798
BnaA10g16150D	0	0	0	0	0	-4.05496
BnaCnng22400D	0	0	0	0	0	-4.00297
BnaCnng32820D	0	0	0	0	0	-4.00293
BnaCnng69510D	0	0	0	0	0	-3.97936
BnaC03g16550D	0	0	0	0	0	-3.96334
BnaC03g07600D	0	0	0	0	0	-3.95811
BnaA02g25520D	0	0	0	0	0	-3.95435
BnaC03g10330D	0	0	0	0	0	-3.9361
BnaCnng39650D	0	0	0	0	0	-3.91284
BnaA03g26220D	0	0	0	0	0	-3.90602
BnaA06g39330D	0	0	0	0	0	-3.9032
BnaA07g27980D	0	0	0	0	0	-3.86622
BnaA01g09070D	0	0	0	0	0	-3.83732
BnaA06g34490D	0	0	0	0	0	-3.80446
BnaA06g13800D	0	0	0	0	0	-3.79945
BnaA05g12630D	0	0	0	0	-1.38347	-3.79678
BnaA09g32060D	0	0	0	0	0	-3.75085
BnaC09g41590D	0	0	0	0	0	-3.72296
BnaA03g60000D	0	0	0	0	0	-3.71073
BnaC01g41400D	0	0	0	0	0	-3.65479
BnaC02g31120D	0	0	0	0	0	-3.64637
BnaA03g10550D	0	0	0	0	0	-3.64609
BnaA05g33720D	0	0	0	0	0	-3.63898
BnaA10g04260D	0	0	0	0	0	-3.63851
BnaC04g16100D	0	0	0	0	-2.07081	-3.61235
BnaA06g27030D	0	0	0	0	0	-3.59613
BnaC06g05340D	0	0	0	0	0	-3.5722
BnaA07g05630D	0	0	0	0	0	-3.56156
BnaA09g06120D	0	0	0	0	0	-3.5595
BnaC07g34230D	0	0	0	0	0	-3.55268
BnaC03g23610D	0	0	0	0	0	-3.50407
BnaA09g29600D	0	0	0	0	0	-3.50227
BnaA07g16680D	0	0	0	0	0	-3.48714
BnaA03g31560D	0	0	0	0	0	-3.4757
BnaC03g61910D	0	0	0	0	0	-3.47526
BnaCnng09400D	0	0	0	0	0	-3.46982
BnaC02g42740D	0	0	0	0	0	-3.46523
BnaC02g37180D	0	0	0	0	0	-3.45294
BnaC08g05020D	0	0	0	0	0	-3.4525
BnaA05g02270D	0	0	0	0	0	-3.45249
BnaC04g40860D	0	0	0	0	0	-3.451
BnaC09g51580D	0	0	0	0	0	-3.44933
BnaC09g17280D	0	0	0	0	0	-3.44091
BnaC04g53030D	0	0	0	0	0	-3.43882
BnaA05g33710D	0	0	0	0	0	-3.42644
BnaA10g18090D	0	0	0	0	0	-3.42635
BnaC07g13200D	0	0	0	0	0	-3.42527
BnaC09g04900D	0	0	0	0	0	-3.40804
BnaA03g26210D	0	0	0	0	0	-3.38361
BnaA09g41470D	0	0	0	0	0	-3.37411
BnaAnng28010D	0	0	0	0	0	-3.37359
BnaA09g52740D	0	0	0	0	0	-3.37249
BnaA04g24790D	0	0	0	0	0	-3.37079
BnaAnng37050D	0	0	0	0	0	-3.36674
BnaA06g33810D	0	0	0	0	0	-3.3516
BnaA07g21130D	0	0	0	0	0	-3.35073
BnaAnng15440D	0	0	0	0	0	-3.33774
BnaC05g41910D	0	0	0	0	0	-3.32942
BnaA04g16150D	0	0	0	0	0	-3.31928
BnaA05g06600D	0	0	0	0	0	-3.31647
BnaAnng09400D	0	0	0	0	0	-3.316
BnaA01g08860D	0	0	0	0	0	-3.28815
BnaC03g14480D	0	0	0	0	0	-3.27119
BnaA03g38750D	0	0	0	0	-1.27023	-3.26273
BnaC03g13250D	0	0	0	0	0	-3.25928
BnaA04g19070D	0	0	0	0	0	-3.24477
BnaA06g16720D	0	0	0	0	0	-3.24133
BnaA10g25110D	0	0	0	0	0	-3.23691
BnaC05g01280D	0	0	0	0	0	-3.22893
BnaC09g06840D	0	0	0	0	0	-3.21623
BnaA06g26060D	0	0	0	0	0	-3.2051
BnaC02g24720D	0	0	0	0	0	-3.19206
BnaAnng31610D	0	0	0	0	0	-3.1663
BnaA10g14840D	0	0	0	0	0	-3.16622
BnaCnng66150D	0	0	0	0	0	-3.13425
BnaC01g10530D	0	0	0	0	-1.04946	-3.13421
BnaA05g00740D	0	0	0	0	0	-3.13086
BnaA03g43530D	0	0	0	0	0	-3.12473
BnaC09g15860D	0	0	0	0	0	-3.10442
BnaC02g14020D	0	0	0	0	0	-3.09602
BnaA08g17480D	0	0	0	0	0	-3.09029
BnaA04g19140D	0	0	0	0	0	-3.08639
BnaC05g13140D	0	0	0	0	0	-3.08247
BnaA01g26600D	0	0	0	0	0	-3.07483
BnaA02g34850D	0	0	0	0	0	-3.07386
BnaC04g45640D	0	0	0	0	0	-3.06665
BnaC03g54440D	0	0	0	0	0	-3.06551
BnaA04g02500D	0	0	0	0	0	-3.0635
BnaC01g03450D	0	0	0	0	0	-3.05701
BnaC03g38830D	0	0	0	0	0	-3.04441
BnaA06g03530D	0	0	0	0	0	-3.03026
BnaA10g25070D	0	0	0	0	0	-3.02669
BnaC01g34040D	0	0	0	0	0	-3.02265
BnaC04g24330D	0	0	0	0	0	-3.01323
BnaC05g23720D	0	0	0	0	0	-3.00301
BnaC04g51100D	0	0	0	0	0	-3.00019
BnaC03g14570D	0	0	0	0	-2.46551	-2.98833
BnaC04g06190D	0	0	0	0	0	-2.98146
BnaA01g10000D	0	0	0	0	0	-2.97557
BnaC08g23920D	0	0	0	0	0	-2.97373
BnaA01g09840D	0	0	0	0	0	-2.97073
BnaC02g33320D	0	0	0	0	0	-2.96803
BnaC05g23580D	0	0	0	0	0	-2.95949
BnaA09g36610D	0	0	0	0	0	-2.94312
BnaC06g25520D	0	0	0	0	0	-2.94113
BnaC01g37470D	0	0	0	0	0	-2.93899
BnaA07g24470D	0	0	0	0	0	-2.93454
BnaC07g28970D	0	0	0	0	0	-2.93061
BnaC01g06770D	0	0	0	0	0	-2.92727
BnaA04g23480D	0	0	0	0	0	-2.91788
BnaA10g30260D	0	0	0	0	0	-2.91631
BnaA09g03180D	0	0	0	0	0	-2.90924
BnaA10g28150D	0	0	0	0	0	-2.89384
BnaA03g15250D	0	0	0	0	0	-2.88513
BnaC04g35020D	0	0	0	0	0	-2.88187
BnaA02g21780D	0	0	0	0	0	-2.87956
BnaA07g11430D	0	0	0	0	0	-2.86297
BnaC09g04450D	0	0	0	0	0	-2.86011
BnaC07g30860D	0	0	0	0	0	-2.84505
BnaAnng11630D	0	0	0	0	0	-2.84251
BnaC09g38990D	0	0	0	0	0	-2.83459
BnaA02g06160D	0	0	0	0	0	-2.83352
BnaA09g50420D	0	0	0	0	0	-2.83189
BnaCnng63980D	0	0	0	0	0	-2.82611
BnaC07g13290D	0	0	0	0	0	-2.82537
BnaA06g31210D	0	0	0	0	0	-2.82464
BnaC08g19610D	0	0	0	0	0	-2.81137
BnaA08g17860D	0	0	0	0	0	-2.80655
BnaAnng31190D	0	0	0	0	0	-2.80293
BnaC09g36390D	0	0	0	0	0	-2.79882
BnaC03g14650D	0	0	0	0	0	-2.79002
BnaA01g18970D	0	0	0	0	0	-2.78813
BnaA09g47380D	0	0	0	0	0	-2.77947
BnaC03g11160D	0	0	0	0	0	-2.7785
BnaAnng18440D	0	0	0	0	0	-2.77751
BnaA07g14610D	0	0	0	0	0	-2.77663
BnaC04g07940D	0	0	0	0	0	-2.77495
BnaAnng17710D	0	0	0	0	0	-2.77445
BnaAnng37410D	0	0	0	0	0	-2.7656
BnaC07g05770D	0	0	0	0	0	-2.75047
BnaC09g28950D	0	0	0	0	0	-2.75018
BnaA06g20760D	0	0	0	0	0	-2.74702
BnaA07g05760D	0	0	0	0	0	-2.74219
BnaC08g22710D	0	0	0	0	0	-2.74091
BnaC01g19760D	0	0	0	0	0	-2.73677
BnaA07g29770D	0	0	0	0	0	-2.73446
BnaAnng41580D	0	0	0	0	0	-2.73252
BnaCnng47940D	0	0	0	0	0	-2.72994
BnaC08g46530D	0	0	0	0	0	-2.72946
BnaC03g21960D	0	0	0	0	0	-2.72807
BnaC04g24310D	0	0	0	0	0	-2.72034
BnaC09g29910D	0	0	0	0	0	-2.71865
BnaA09g02390D	0	0	0	0	0	-2.71471
BnaC08g27340D	0	0	0	0	0	-2.70924
BnaA08g04430D	0	0	0	0	0	-2.6976
BnaC03g45610D	0	0	0	0	0	-2.69685
BnaA02g31040D	0	0	0	0	0	-2.69333
BnaC08g30910D	0	0	0	0	0	-2.6931
BnaA10g19750D	0	0	0	0	0	-2.68435
BnaCnng18850D	0	0	0	0	0	-2.68371
BnaC09g54190D	0	0	0	0	0	-2.68037
BnaA07g12500D	0	0	0	0	0	-2.67804
BnaC03g57220D	0	0	0	0	0	-2.66774
BnaC05g36730D	0	0	0	0	0	-2.66554
BnaC05g00400D	0	0	0	0	0	-2.65953
BnaA06g01630D	0	0	0	0	0	-2.65939
BnaC03g59400D	0	0	0	0	0	-2.6574
BnaC07g46940D	0	0	0	0	0	-2.65383
BnaA05g24300D	0	0	0	0	0	-2.6517
BnaA02g14340D	0	0	0	0	0	-2.64997
BnaA10g13620D	0	0	0	0	0	-2.64646
BnaA09g15230D	0	0	0	0	0	-2.64625
BnaC08g27790D	0	0	0	0	0	-2.64496
BnaA07g21770D	0	0	0	0	0	-2.64487
BnaA10g26770D	0	0	0	0	0	-2.63975
BnaA04g24080D	0	0	0	0	0	-2.63781
BnaA09g27890D	0	0	0	0	0	-2.63418
BnaC05g18450D	0	0	0	0	0	-2.62671
BnaA03g05860D	0	0	0	0	0	-2.62399
BnaC01g02210D	0	0	0	0	0	-2.62321
BnaC02g19350D	0	0	0	0	0	-2.61517
BnaA08g22070D	0	0	0	0	0	-2.61455
BnaC08g29430D	0	0	0	0	0	-2.60744
BnaA02g30470D	0	0	0	0	0	-2.60152
BnaC05g17280D	0	0	0	0	0	-2.59584
BnaCnng74900D	0	0	0	0	0	-2.5947
BnaC03g10320D	0	0	0	0	0	-2.59281
BnaC04g46160D	0	0	0	0	0	-2.59175
BnaA05g06110D	0	0	0	0	0	-2.59159
BnaC04g32750D	0	0	0	0	0	-2.58784
BnaA03g02990D	0	0	0	0	0	-2.58721
BnaC08g31390D	0	0	0	0	0	-2.58701
BnaA03g13580D	0	0	0	0	0	-2.58591
BnaC03g76920D	0	0	0	0	0	-2.58563
BnaA09g19920D	0	0	0	0	0	-2.58523
BnaC01g29930D	0	0	0	0	0	-2.57546
BnaC04g40260D	0	0	0	0	0	-2.57083
BnaC06g30900D	0	0	0	0	0	-2.57006
BnaAnng38380D	0	0	0	0	-1.49426	-2.5696
BnaC07g26580D	0	0	0	0	0	-2.56847
BnaC01g43680D	0	0	0	0	0	-2.565
BnaCnng59530D	0	0	0	0	0	-2.56284
BnaA02g18200D	0	0	0	0	0	-2.55673
BnaC06g04560D	0	0	0	0	0	-2.555
BnaA10g19220D	0	0	0	0	0	-2.5539
BnaC07g25440D	0	0	0	0	0	-2.54918
BnaA08g20470D	0	0	0	0	0	-2.54898
BnaC03g08490D	0	0	0	0	0	-2.54787
BnaC09g51520D	0	0	0	0	0	-2.5474
BnaA01g08870D	0	0	0	0	0	-2.547
BnaC06g25680D	0	0	0	0	0	-2.54586
BnaC08g06300D	0	0	0	0	0	-2.5435
BnaA08g18050D	0	0	0	0	0	-2.5426
BnaA08g15610D	0	0	0	0	-1.12028	-2.538
BnaC06g15450D	0	0	0	0	0	-2.53686
BnaCnng56000D	0	0	0	0	0	-2.53549
BnaA09g47970D	0	0	0	0	0	-2.53297
BnaA07g32480D	0	0	0	0	0	-2.52814
BnaC05g01780D	0	0	0	0	0	-2.52641
BnaA07g17500D	0	0	0	0	0	-2.52541
BnaA01g28120D	0	0	0	0	0	-2.52413
BnaA09g43600D	0	0	0	0	0	-2.5209
BnaCnng13230D	0	0	0	0	0	-2.5109
BnaC05g07750D	0	0	0	0	0	-2.50834
BnaC05g04490D	0	0	0	0	0	-2.50797
BnaC03g41930D	0	0	0	0	0	-2.50373
BnaC06g28780D	0	0	0	0	0	-2.50334
BnaC08g35500D	0	0	0	0	0	-2.50163
BnaC09g49790D	0	0	0	0	-1.56855	-2.50041
BnaA04g20350D	0	0	0	0	0	-2.49834
BnaC02g17670D	0	0	0	0	0	-2.49585
BnaA09g38980D	0	0	0	0	0	-2.49509
BnaCnng69070D	0	0	0	0	0	-2.4947
BnaA06g00690D	0	0	0	0	0	-2.48981
BnaA03g16830D	0	0	0	0	0	-2.48948
BnaC06g24360D	0	0	0	0	0	-2.48732
BnaA01g32740D	0	0	0	0	0	-2.48731
BnaA09g22870D	0	0	0	0	0	-2.48313
BnaA06g13410D	0	0	0	0	0	-2.47865
BnaA01g04650D	0	0	0	0	0	-2.47857
BnaC05g18410D	0	0	0	0	0	-2.47569
BnaAnng12450D	0	0	0	0	0	-2.47513
BnaA04g10950D	0	0	0	0	0	-2.47243
BnaA03g18480D	0	0	0	0	0	-2.47155
BnaC09g13580D	0	0	0	0	0	-2.47049
BnaA08g27570D	0	0	0	0	0	-2.46982
BnaA02g37060D	0	0	0	0	0	-2.46472
BnaA06g29700D	0	0	0	0	0	-2.44985
BnaA05g12290D	0	0	0	0	0	-2.44551
BnaA03g09610D	0	0	0	0	0	-2.44101
BnaA06g16330D	0	0	0	0	0	-2.4402
BnaCnng70190D	0	0	0	0	0	-2.43865
BnaA10g24150D	0	0	0	0	0	-2.43852
BnaC06g27960D	0	0	0	0	0	-2.43606
BnaA03g21360D	0	0	0	0	0	-2.43254
BnaC09g49010D	0	0	0	0	0	-2.43234
BnaC03g65520D	0	0	0	0	0	-2.43014
BnaC08g16330D	0	0	0	0	0	-2.42961
BnaC03g40240D	0	0	0	0	0	-2.42783
BnaC05g39800D	0	0	0	0	0	-2.42289
BnaA01g08240D	0	0	0	0	0	-2.41455
BnaC07g36810D	0	0	0	0	0	-2.40838
BnaA03g24600D	0	0	0	0	0	-2.4056
BnaC07g13600D	0	0	0	0	0	-2.40438
BnaC03g41300D	0	0	0	0	0	-2.39799
BnaC01g41850D	0	0	0	0	0	-2.39581
BnaC03g25090D	0	0	0	0	0	-2.39377
BnaA04g02490D	0	0	0	0	0	-2.38635
BnaC01g07980D	0	0	0	0	0	-2.38497
BnaA06g05820D	0	0	0	0	0	-2.37833
BnaA05g00450D	0	0	0	0	0	-2.37811
BnaA02g14990D	0	0	0	0	0	-2.37723
BnaC06g23590D	0	0	0	0	0	-2.37471
BnaA06g30140D	0	0	0	0	0	-2.36839
BnaC01g09950D	0	0	0	0	0	-2.36825
BnaA02g14330D	0	0	0	0	0	-2.36396
BnaC01g41230D	0	0	0	0	0	-2.36099
BnaC02g45050D	0	0	0	0	0	-2.35674
BnaA10g13530D	0	0	0	0	0	-2.3561
BnaA05g10730D	0	0	0	0	0	-2.35369
BnaA09g14690D	0	0	0	0	0	-2.35206
BnaC06g03760D	0	0	0	0	0	-2.34415
BnaC07g25530D	0	0	0	0	0	-2.34374
BnaC09g07240D	0	0	0	0	0	-2.34005
BnaA05g23300D	0	0	0	0	0	-2.3396
BnaC03g47950D	0	0	0	0	0	-2.33747
BnaA09g39130D	0	0	0	0	0	-2.33746
BnaA06g27970D	0	0	0	0	0	-2.33705
BnaA10g13630D	0	0	0	0	0	-2.33404
BnaA01g15110D	0	0	0	0	0	-2.33189
BnaC08g38370D	0	0	0	0	0	-2.32862
BnaA03g19150D	0	0	0	0	0	-2.32818
BnaAnng00290D	0	0	0	0	0	-2.32688
BnaC07g31070D	0	0	0	0	0	-2.32492
BnaC05g31680D	0	0	0	0	0	-2.32426
BnaA07g10520D	0	0	0	0	0	-2.32346
BnaA03g39920D	0	0	0	0	0	-2.32143
BnaA03g08590D	0	0	0	0	0	-2.32064
BnaC08g13950D	0	0	0	0	0	-2.31987
BnaA05g07200D	0	0	0	0	0	-2.31842
BnaC06g23330D	0	0	0	0	0	-2.31645
BnaA10g28720D	0	0	0	0	0	-2.31083
BnaC08g48560D	0	0	0	0	0	-2.30862
BnaCnng02950D	0	0	0	0	0	-2.30137
BnaC02g41180D	0	0	0	0	0	-2.30063
BnaA04g24090D	0	0	0	0	-1.11377	-2.29574
BnaC06g15950D	0	0	0	0	0	-2.29559
BnaC04g56730D	0	0	0	0	0	-2.29407
BnaC04g15310D	0	0	0	0	0	-2.29058
BnaC04g18920D	0	0	0	0	0	-2.29046
BnaC01g39760D	0	0	0	0	-1.62269	-2.28934
BnaA01g11960D	0	0	0	0	0	-2.28844
BnaA10g29340D	0	0	0	0	0	-2.2794
BnaA06g01920D	0	0	0	0	0	-2.27865
BnaCnng03050D	0	0	0	0	0	-2.27369
BnaA06g18430D	0	0	0	0	0	-2.27274
BnaCnng73380D	0	0	0	0	0	-2.26825
BnaA01g12820D	0	0	0	0	0	-2.2639
BnaA04g17080D	0	0	0	0	0	-2.263
BnaC03g61760D	0	0	0	0	0	-2.26263
BnaC07g27800D	0	0	0	0	0	-2.2604
BnaA08g01340D	0	0	0	0	0	-2.25799
BnaA01g18510D	0	0	0	0	0	-2.25786
BnaC08g06060D	0	0	0	0	0	-2.25742
BnaA02g18840D	0	0	0	0	0	-2.2548
BnaC04g03780D	0	0	0	0	0	-2.25175
BnaA02g12210D	0	0	0	0	0	-2.24891
BnaA10g01430D	0	0	0	0	0	-2.24405
BnaC09g22390D	0	0	0	0	0	-2.23636
BnaCnng72660D	0	0	0	0	0	-2.2264
BnaC08g13970D	0	0	0	0	0	-2.22568
BnaA08g22230D	0	0	0	0	-1.34493	-2.22305
BnaA05g11910D	0	0	0	0	0	-2.2201
BnaA06g39390D	0	0	0	0	0	-2.21598
BnaC07g19390D	0	0	0	0	0	-2.21439
BnaC03g37060D	0	0	0	0	0	-2.20996
BnaC03g55450D	0	0	0	0	0	-2.20974
BnaA07g31710D	0	0	0	0	0	-2.20907
BnaC02g43470D	0	0	0	0	0	-2.20862
BnaA02g25170D	0	0	0	0	0	-2.2073
BnaA01g15430D	0	0	0	0	-1.08854	-2.2058
BnaA05g01960D	0	0	0	0	0	-2.20208
BnaCnng01850D	0	0	0	0	0	-2.20109
BnaA05g05390D	0	0	0	0	0	-2.20003
BnaA06g28900D	0	0	0	0	0	-2.19971
BnaC02g26290D	0	0	0	0	0	-2.19854
BnaA04g21420D	0	0	0	0	0	-2.19844
BnaA06g03700D	0	0	0	0	0	-2.19747
BnaCnng31040D	0	0	0	0	0	-2.19143
BnaA01g12810D	0	0	0	0	0	-2.19044
BnaC04g38140D	0	0	0	0	0	-2.18887
BnaA03g18570D	0	0	0	0	0	-2.1877
BnaA10g16270D	0	0	0	0	0	-2.1795
BnaC06g02740D	0	0	0	0	0	-2.17285
BnaA03g49190D	0	0	0	0	0	-2.17095
BnaA06g37080D	0	0	0	0	0	-2.17003
BnaC03g72930D	0	0	0	0	0	-2.16604
BnaC08g43620D	0	0	0	0	0	-2.16576
BnaCnng38850D	0	0	0	0	0	-2.16393
BnaA02g35530D	0	0	0	0	0	-2.16375
BnaA03g06640D	0	0	0	0	0	-2.16262
BnaCnng01670D	0	0	0	0	0	-2.161
BnaA09g39050D	0	0	0	0	0	-2.15826
BnaCnng46610D	0	0	0	0	0	-2.15535
BnaC09g34240D	0	0	0	0	0	-2.15237
BnaA03g58260D	0	0	0	0	0	-2.15172
BnaC05g50730D	0	0	0	0	0	-2.15032
BnaA10g26680D	0	0	0	0	0	-2.14968
BnaC06g43560D	0	0	0	0	0	-2.14717
BnaC07g37000D	0	0	0	0	0	-2.14707
BnaA10g13380D	0	0	0	0	0	-2.14614
BnaC02g07540D	0	0	0	0	0	-2.14166
BnaC01g07630D	0	0	0	0	0	-2.14096
BnaC05g41870D	0	0	0	0	0	-2.14038
BnaC07g43990D	0	0	0	0	0	-2.13976
BnaA01g11700D	0	0	0	0	0	-2.13681
BnaC01g01680D	0	0	0	0	0	-2.13534
BnaC02g00460D	0	0	0	0	0	-2.13073
BnaA05g33770D	0	0	0	0	0	-2.13037
BnaA03g11770D	0	0	0	0	0	-2.12963
BnaAnng36200D	0	0	0	0	0	-2.12762
BnaCnng75720D	0	0	0	0	0	-2.12518
BnaA09g35520D	0	0	0	0	0	-2.12515
BnaC01g18170D	0	0	0	0	0	-2.12515
BnaCnng71550D	0	0	0	0	0	-2.12163
BnaA08g01770D	0	0	0	0	0	-2.11685
BnaA09g12730D	0	0	0	0	0	-2.10847
BnaC01g02330D	0	0	0	0	0	-2.10317
BnaA01g06370D	0	0	0	0	0	-2.09854
BnaA08g11380D	0	0	0	0	0	-2.09578
BnaA07g28080D	0	0	0	0	0	-2.09498
BnaA06g07600D	0	0	0	0	0	-2.0945
BnaC01g22480D	0	0	0	0	0	-2.09233
BnaA07g15810D	0	0	0	0	0	-2.08968
BnaA02g17260D	0	0	0	0	0	-2.08948
BnaC05g14950D	0	0	0	0	0	-2.08425
BnaC04g24490D	0	0	0	0	0	-2.08418
BnaC04g17300D	0	0	0	0	0	-2.08156
BnaCnng17590D	0	0	0	0	0	-2.07868
BnaC04g38490D	0	0	0	0	0	-2.07766
BnaA08g16350D	0	0	0	0	0	-2.07387
BnaCnng33710D	0	0	0	0	0	-2.06965
BnaC05g40440D	0	0	0	0	0	-2.06727
BnaC03g10670D	0	0	0	0	0	-2.06519
BnaA01g06640D	0	0	0	0	0	-2.06497
BnaA05g35760D	0	0	0	0	0	-2.06379
BnaC03g14290D	0	0	0	0	0	-2.06247
BnaA05g35020D	0	0	0	0	0	-2.06074
BnaCnng35090D	0	0	0	0	0	-2.05967
BnaA09g13580D	0	0	0	0	0	-2.05905
BnaA02g32440D	0	0	0	0	0	-2.05684
BnaA03g08390D	0	0	0	0	0	-2.05682
BnaAnng00950D	0	0	0	0	0	-2.05628
BnaC07g22980D	0	0	0	0	0	-2.05329
BnaAnng35830D	0	0	0	0	0	-2.05187
BnaA07g03710D	0	0	0	0	0	-2.04493
BnaC06g35560D	0	0	0	0	0	-2.03948
BnaA08g24940D	0	0	0	0	0	-2.0389
BnaA02g25180D	0	0	0	0	0	-2.03847
BnaC07g30400D	0	0	0	0	0	-2.03826
BnaC02g07020D	0	0	0	0	0	-2.03756
BnaC07g00340D	0	0	0	0	0	-2.03541
BnaC06g18370D	0	0	0	0	0	-2.03513
BnaA03g30000D	0	0	0	0	0	-2.03495
BnaA10g07270D	0	0	0	0	0	-2.03304
BnaCnng59830D	0	0	0	0	0	-2.03129
BnaC08g19280D	0	0	0	0	-1.14739	-2.01875
BnaC04g04400D	0	0	0	0	0	-2.01786
BnaA03g57190D	0	0	0	0	0	-2.01672
BnaA03g54320D	0	0	0	0	0	-2.01512
BnaC04g05450D	0	0	0	0	0	-2.01497
BnaA03g19400D	0	0	0	0	0	-2.00908
BnaA07g05390D	0	0	0	0	0	-2.00751
BnaAnng31450D	0	0	0	0	0	-2.00675
BnaA05g13030D	0	0	0	0	0	-2.00331
BnaA03g50250D	0	0	0	0	0	-2.00306
BnaCnng24960D	0	0	0	0	0	-2.00105
BnaC07g05830D	0	0	0	0	0	-1.99819
BnaC02g38800D	0	0	0	0	0	-1.99801
BnaC04g13950D	0	0	0	0	0	-1.99695
BnaA07g32200D	0	0	0	0	-1.4294	-1.99631
BnaCnng65040D	0	0	0	0	0	-1.99607
BnaA06g20940D	0	0	0	0	0	-1.99425
BnaA07g36440D	0	0	0	0	0	-1.99393
BnaA06g30720D	0	0	0	0	0	-1.99284
BnaA07g19120D	0	0	0	0	0	-1.99212
BnaA09g52090D	0	0	0	0	0	-1.99198
BnaA07g09330D	0	0	0	0	0	-1.99102
BnaC09g04990D	0	0	0	0	0	-1.98985
BnaC03g50640D	0	0	0	0	0	-1.98749
BnaA06g32840D	0	0	0	0	0	-1.98728
BnaA07g06770D	0	0	0	0	0	-1.98393
BnaA01g02780D	0	0	0	0	0	-1.9828
BnaC02g04870D	0	0	0	0	0	-1.98259
BnaA09g39580D	0	0	0	0	0	-1.98092
BnaA03g15870D	0	0	0	0	0	-1.97955
BnaA08g11030D	0	0	0	0	0	-1.97749
BnaA09g30290D	0	0	0	0	0	-1.97702
BnaC06g28390D	0	0	0	0	0	-1.97697
BnaC04g01170D	0	0	0	0	0	-1.97484
BnaA07g11770D	0	0	0	0	0	-1.9719
BnaA04g26290D	0	0	0	0	0	-1.97112
BnaC08g29910D	0	0	0	0	0	-1.97035
BnaC03g42920D	0	0	0	0	0	-1.96497
BnaA07g23310D	0	0	0	0	0	-1.96223
BnaC07g27050D	0	0	0	0	0	-1.96073
BnaC03g41490D	0	0	0	0	0	-1.96043
BnaAnng25820D	0	0	0	0	0	-1.95915
BnaCnng11320D	0	0	0	0	0	-1.95902
BnaC04g05580D	0	0	0	0	0	-1.95509
BnaC08g32360D	0	0	0	0	0	-1.95441
BnaA06g27480D	0	0	0	0	0	-1.95426
BnaA05g26770D	0	0	0	0	0	-1.95291
BnaC04g50590D	0	0	0	0	0	-1.95203
BnaC04g04780D	0	0	0	0	0	-1.95188
BnaA10g22670D	0	0	0	0	0	-1.95108
BnaA05g01120D	0	0	0	0	0	-1.94834
BnaC06g11760D	0	0	0	0	0	-1.94721
BnaA10g04040D	0	0	0	0	0	-1.94653
BnaC05g34570D	0	0	0	0	0	-1.94648
BnaA05g05020D	0	0	0	0	0	-1.94538
BnaCnng55740D	0	0	0	0	0	-1.94282
BnaA09g52270D	0	0	0	0	0	-1.94247
BnaA03g21030D	0	0	0	0	0	-1.94212
BnaA03g52920D	0	0	0	0	0	-1.94009
BnaA01g35580D	0	0	0	0	0	-1.93841
BnaA05g29810D	0	0	0	0	0	-1.93695
BnaAnng15760D	0	0	0	0	0	-1.93667
BnaA03g54160D	0	0	0	0	0	-1.93551
BnaC03g34730D	0	0	0	0	0	-1.93443
BnaA04g10320D	0	0	0	0	0	-1.93397
BnaC04g23140D	0	0	0	0	0	-1.93026
BnaC09g02230D	0	0	0	0	0	-1.92987
BnaA04g26560D	0	0	0	0	0	-1.92843
BnaCnng25660D	0	0	0	0	0	-1.92685
BnaA10g20670D	0	0	0	0	0	-1.92613
BnaA05g00130D	0	0	0	0	0	-1.92539
BnaA03g55940D	0	0	0	0	0	-1.92135
BnaA04g21960D	0	0	0	0	0	-1.91915
BnaC04g05070D	0	0	0	0	-2.05622	-1.91904
BnaC04g43770D	0	0	0	0	0	-1.91731
BnaA05g08310D	0	0	0	0	0	-1.91646
BnaA01g05280D	0	0	0	0	0	-1.9154
BnaC06g36410D	0	0	0	0	0	-1.91379
BnaA03g39800D	0	0	0	0	0	-1.91289
BnaA10g11600D	0	0	0	0	0	-1.90871
BnaA05g08730D	0	0	0	0	0	-1.90752
BnaA01g13890D	0	0	0	0	0	-1.90697
BnaC04g00020D	0	0	0	0	0	-1.90672
BnaC07g48390D	0	0	0	0	0	-1.90625
BnaA01g19230D	0	0	0	0	0	-1.90389
BnaA10g06290D	0	0	0	0	0	-1.90334
BnaA09g53400D	0	0	0	0	0	-1.90273
BnaAnng30710D	0	0	0	0	0	-1.89982
BnaC03g68880D	0	0	0	0	0	-1.89814
BnaA04g11700D	0	0	0	0	0	-1.89778
BnaC06g20270D	0	0	0	0	0	-1.89671
BnaAnng18410D	0	0	0	0	0	-1.89513
BnaA04g27120D	0	0	0	0	0	-1.89486
BnaA08g09100D	0	0	0	0	0	-1.89406
BnaC05g47100D	0	0	0	0	0	-1.89376
BnaA02g09520D	0	0	0	0	0	-1.89348
BnaA08g21730D	0	0	0	0	0	-1.89109
BnaA03g21930D	0	0	0	0	0	-1.89075
BnaC04g24020D	0	0	0	0	0	-1.88708
BnaA09g52990D	0	0	0	0	0	-1.88642
BnaCnng14430D	0	0	0	0	0	-1.88568
BnaA01g36890D	0	0	0	0	0	-1.8855
BnaA06g26390D	0	0	0	0	0	-1.88393
BnaC07g13300D	0	0	0	0	0	-1.88316
BnaA03g57690D	0	0	0	0	0	-1.88168
BnaA07g29490D	0	0	0	0	0	-1.87966
BnaA05g20100D	0	0	0	0	0	-1.87824
BnaCnng76000D	0	0	0	0	0	-1.87749
BnaC03g60860D	0	0	0	0	0	-1.8748
BnaA09g23850D	0	0	0	0	0	-1.87186
BnaC01g33830D	0	0	0	0	0	-1.86948
BnaC07g12870D	0	0	0	0	-1.18372	-1.86887
BnaAnng27240D	0	0	0	0	0	-1.8675
BnaA01g20560D	0	0	0	0	0	-1.86621
BnaC08g41390D	0	0	0	0	0	-1.86433
BnaC06g13220D	0	0	0	0	0	-1.86281
BnaA07g11590D	0	0	0	0	0	-1.86018
BnaC04g40730D	0	0	0	0	0	-1.85717
BnaC05g18820D	0	0	0	0	0	-1.85614
BnaC01g17520D	0	0	0	0	0	-1.85594
BnaA10g09570D	0	0	0	0	0	-1.85585
BnaA10g08550D	0	0	0	0	-1.25004	-1.85394
BnaC05g46330D	0	0	0	0	0	-1.85356
BnaC08g12610D	0	0	0	0	0	-1.85058
BnaC07g21370D	0	0	0	0	0	-1.84964
BnaA07g14940D	0	0	0	0	0	-1.84879
BnaA06g34430D	0	0	0	0	0	-1.84744
BnaC02g24360D	0	0	0	0	0	-1.84621
BnaC07g22240D	0	0	0	0	0	-1.84392
BnaA01g02240D	0	0	0	0	0	-1.84174
BnaA07g07370D	0	0	0	0	0	-1.8402
BnaC09g08400D	0	0	0	0	0	-1.83748
BnaA01g28710D	0	0	0	0	0	-1.83647
BnaA09g08540D	0	0	0	0	0	-1.83623
BnaA06g07180D	0	0	0	0	0	-1.83531
BnaC01g16330D	0	0	0	0	0	-1.83518
BnaC07g16030D	0	0	0	0	-1.18334	-1.83447
BnaC08g28150D	0	0	0	0	0	-1.83334
BnaA05g12490D	0	0	0	0	0	-1.83073
BnaA09g36970D	0	0	0	0	0	-1.82969
BnaA01g14240D	0	0	0	0	0	-1.82549
BnaAnng07910D	0	0	0	0	0	-1.8243
BnaC05g11430D	0	0	0	0	0	-1.82397
BnaA06g40940D	0	0	0	0	0	-1.8234
BnaA02g36580D	0	0	0	0	0	-1.82261
BnaA01g29000D	0	0	0	0	0	-1.82206
BnaA04g27160D	0	0	0	0	0	-1.82129
BnaC07g09060D	0	0	0	0	-1.36624	-1.82089
BnaA05g19550D	0	0	0	0	0	-1.82085
BnaAnng13970D	0	0	0	0	0	-1.82023
BnaC05g31460D	0	0	0	0	0	-1.81999
BnaC04g50940D	0	0	0	0	0	-1.81829
BnaC04g38390D	0	0	0	0	0	-1.81634
BnaA04g20580D	0	0	0	0	0	-1.81547
BnaA01g08930D	0	0	0	0	0	-1.81164
BnaCnng02480D	0	0	0	0	0	-1.81153
BnaC01g07430D	0	0	0	0	0	-1.81133
BnaA08g24710D	0	0	0	0	0	-1.81079
BnaA02g23290D	0	0	0	0	0	-1.81026
BnaUnng04840D	0	0	0	0	0	-1.8097
BnaA08g19000D	0	0	0	0	0	-1.8088
BnaA05g36440D	0	0	0	0	0	-1.80741
BnaC09g37040D	0	0	0	0	0	-1.80728
BnaA05g19640D	0	0	0	0	0	-1.80453
BnaC02g19980D	0	0	0	0	0	-1.80439
BnaC04g09090D	0	0	0	0	0	-1.80356
BnaC08g34080D	0	0	0	0	0	-1.80134
BnaC09g46680D	0	0	0	0	0	-1.80132
BnaC09g40060D	0	0	0	0	0	-1.80057
BnaAnng09360D	0	0	0	0	0	-1.79942
BnaC06g01220D	0	0	0	0	0	-1.79715
BnaCnng29490D	0	0	0	0	0	-1.79588
BnaC08g19510D	0	0	0	0	0	-1.79571
BnaA04g22640D	0	0	0	0	0	-1.79528
BnaA09g26160D	0	0	0	0	0	-1.79108
BnaA03g15930D	0	0	0	0	0	-1.79022
BnaC01g09940D	0	0	0	0	0	-1.7885
BnaA10g16170D	0	0	0	0	-1.40887	-1.78842
BnaC02g05020D	0	0	0	0	0	-1.78836
BnaA09g52260D	0	0	0	0	0	-1.78744
BnaA09g51830D	0	0	0	0	0	-1.78724
BnaC05g45640D	0	0	0	0	0	-1.78712
BnaA02g05240D	0	0	0	0	0	-1.78352
BnaC02g19180D	0	0	0	0	0	-1.78272
BnaA04g16000D	0	0	0	0	0	-1.78243
BnaA03g12300D	0	0	0	0	0	-1.7818
BnaA08g03140D	0	0	0	0	0	-1.78155
BnaC03g12910D	0	0	0	0	0	-1.78127
BnaC04g14260D	0	0	0	0	0	-1.78078
BnaC04g01120D	0	0	0	0	0	-1.78023
BnaA09g03190D	0	0	0	0	0	-1.77868
BnaA04g03710D	0	0	0	0	0	-1.77675
BnaA03g29440D	0	0	0	0	0	-1.7764
BnaC08g22010D	0	0	0	0	0	-1.77312
BnaCnng54500D	0	0	0	0	0	-1.77252
BnaA10g13830D	0	0	0	0	0	-1.77235
BnaA09g14700D	0	0	0	0	0	-1.77143
BnaA05g33760D	0	0	0	0	0	-1.77069
BnaC06g34520D	0	0	0	0	0	-1.77009
BnaA03g55180D	0	0	0	0	0	-1.7696
BnaA07g11270D	0	0	0	0	0	-1.76686
BnaCnng54760D	0	0	0	0	0	-1.76516
BnaC05g15670D	0	0	0	0	0	-1.76394
BnaC05g01490D	0	0	0	0	0	-1.76174
BnaA08g07950D	0	0	0	0	0	-1.76129
BnaA01g06860D	0	0	0	0	0	-1.76037
BnaA05g37040D	0	0	0	0	0	-1.76
BnaCnng54750D	0	0	0	0	0	-1.7591
BnaC04g14740D	0	0	0	0	0	-1.75517
BnaA01g15330D	0	0	0	0	0	-1.75296
BnaA05g23080D	0	0	0	0	0	-1.75181
BnaC09g23130D	0	0	0	0	0	-1.75145
BnaC07g51130D	0	0	0	0	0	-1.75128
BnaA03g50050D	0	0	0	0	0	-1.7511
BnaA08g29560D	0	0	0	0	0	-1.75073
BnaC05g38240D	0	0	0	0	0	-1.75055
BnaC08g39380D	0	0	0	0	0	-1.74999
BnaC03g71530D	0	0	0	0	-1.26121	-1.74995
BnaA03g25050D	0	0	0	0	0	-1.74762
BnaC09g53890D	0	0	0	0	0	-1.74503
BnaC03g24360D	0	0	0	0	0	-1.74435
BnaA10g01740D	0	0	0	0	0	-1.74298
BnaA10g19770D	0	0	0	0	0	-1.74136
BnaA01g03500D	0	0	0	0	0	-1.74114
BnaA03g04010D	0	0	0	0	0	-1.74084
BnaC01g10620D	0	0	0	0	0	-1.73895
BnaAnng00410D	0	0	0	0	0	-1.73795
BnaCnng20120D	0	0	0	0	0	-1.73716
BnaA09g52000D	0	0	0	0	0	-1.73615
BnaA06g31240D	0	0	0	0	0	-1.73574
BnaC01g16320D	0	0	0	0	0	-1.7353
BnaC05g16000D	0	0	0	0	0	-1.73527
BnaA05g11930D	0	0	0	0	0	-1.73496
BnaA09g33130D	0	0	0	0	0	-1.73491
BnaC08g27200D	0	0	0	0	0	-1.73452
BnaC02g38820D	0	0	0	0	0	-1.73415
BnaC08g19360D	0	0	0	0	0	-1.73369
BnaA05g32500D	0	0	0	0	0	-1.73196
BnaC02g03260D	0	0	0	0	0	-1.73051
BnaA10g11520D	0	0	0	0	0	-1.7303
BnaA09g35840D	0	0	0	0	0	-1.72926
BnaC04g47350D	0	0	0	0	0	-1.72835
BnaA06g02370D	0	0	0	0	0	-1.72811
BnaA06g24290D	0	0	0	0	0	-1.72608
BnaA03g53010D	0	0	0	0	0	-1.72552
BnaA04g21240D	0	0	0	0	0	-1.72489
BnaC08g40020D	0	0	0	0	0	-1.72459
BnaA04g05980D	0	0	0	0	0	-1.72344
BnaA08g10640D	0	0	0	0	0	-1.72334
BnaA03g27800D	0	0	0	0	0	-1.72325
BnaA09g13310D	0	0	0	0	0	-1.72316
BnaC05g41570D	0	0	0	0	0	-1.72242
BnaC05g11730D	0	0	0	0	0	-1.7218
BnaC01g01060D	0	0	0	0	0	-1.7205
BnaC07g38190D	0	0	0	0	0	-1.71996
BnaA06g07050D	0	0	0	0	0	-1.71882
BnaA06g02350D	0	0	0	0	0	-1.71851
BnaA01g08770D	0	0	0	0	0	-1.71403
BnaA06g35930D	0	0	0	0	0	-1.71268
BnaA01g16070D	0	0	0	0	0	-1.71119
BnaCnng51440D	0	0	0	0	0	-1.71101
BnaA03g17000D	0	0	0	0	0	-1.70871
BnaC04g08270D	0	0	0	0	0	-1.70837
BnaA02g18920D	0	0	0	0	0	-1.70658
BnaA03g13410D	0	0	0	0	0	-1.70429
BnaA04g02200D	0	0	0	0	0	-1.70426
BnaA09g57100D	0	0	0	0	0	-1.70414
BnaC07g15110D	0	0	0	0	0	-1.70299
BnaA10g04510D	0	0	0	0	0	-1.7028
BnaA01g23600D	0	0	0	0	0	-1.69914
BnaC04g48170D	0	0	0	0	0	-1.6991
BnaA10g11950D	0	0	0	0	0	-1.69792
BnaC03g42810D	0	0	0	0	0	-1.69701
BnaC04g12550D	0	0	0	0	0	-1.69693
BnaC03g19060D	0	0	0	0	0	-1.69584
BnaC05g19220D	0	0	0	0	0	-1.6953
BnaC01g29980D	0	0	0	0	0	-1.6946
BnaA08g15490D	0	0	0	0	0	-1.69389
BnaA01g23120D	0	0	0	0	0	-1.69227
BnaC04g16470D	0	0	0	0	0	-1.69226
BnaA01g07720D	0	0	0	0	0	-1.68952
BnaA09g14420D	0	0	0	0	0	-1.68932
BnaA06g03110D	0	0	0	0	0	-1.6893
BnaA03g27360D	0	0	0	0	0	-1.68888
BnaC09g48690D	0	0	0	0	0	-1.68816
BnaA09g30170D	0	0	0	0	0	-1.68769
BnaC04g06030D	0	0	0	0	0	-1.68649
BnaC02g38400D	0	0	0	0	0	-1.68608
BnaCnng58250D	0	0	0	0	0	-1.68596
BnaA01g22920D	0	0	0	0	0	-1.68525
BnaCnng03380D	0	0	0	0	0	-1.68514
BnaAnng26090D	0	0	0	0	0	-1.68502
BnaA03g00260D	0	0	0	0	0	-1.68412
BnaA05g10330D	0	0	0	0	0	-1.68215
BnaC07g42730D	0	0	0	0	0	-1.68127
BnaC03g32360D	0	0	0	0	0	-1.67992
BnaA07g23380D	0	0	0	0	0	-1.67825
BnaC04g50910D	0	0	0	0	0	-1.67678
BnaC04g47830D	0	0	0	0	0	-1.67661
BnaC07g39110D	0	0	0	0	0	-1.67627
BnaC01g01910D	0	0	0	0	0	-1.67522
BnaA09g25210D	0	0	0	0	0	-1.67521
BnaC02g43700D	0	0	0	0	0	-1.67399
BnaC06g06380D	0	0	0	0	0	-1.67392
BnaC03g23750D	0	0	0	0	0	-1.67229
BnaC07g43150D	0	0	0	0	0	-1.67108
BnaA09g16290D	0	0	0	0	0	-1.66943
BnaC05g19370D	0	0	0	0	0	-1.66918
BnaCnng00560D	0	0	0	0	0	-1.6684
BnaC03g21590D	0	0	0	0	0	-1.6676
BnaCnng02360D	0	0	0	0	0	-1.6648
BnaAnng07920D	0	0	0	0	0	-1.66466
BnaCnng18800D	0	0	0	0	0	-1.66421
BnaA06g35830D	0	0	0	0	0	-1.66276
BnaC03g15580D	0	0	0	0	0	-1.66057
BnaA09g29480D	0	0	0	0	0	-1.65972
BnaA09g24950D	0	0	0	0	0	-1.65964
BnaC01g13420D	0	0	0	0	0	-1.65927
BnaA07g03650D	0	0	0	0	0	-1.65816
BnaA09g09560D	0	0	0	0	0	-1.65413
BnaC05g07370D	0	0	0	0	0	-1.65362
BnaC02g05970D	0	0	0	0	0	-1.65132
BnaA10g26150D	0	0	0	0	0	-1.64995
BnaC04g08000D	0	0	0	0	0	-1.64829
BnaA09g12300D	0	0	0	0	0	-1.64827
BnaC01g01800D	0	0	0	0	0	-1.64817
BnaA06g31790D	0	0	0	0	0	-1.64788
BnaC05g13410D	0	0	0	0	0	-1.64784
BnaC09g02620D	0	0	0	0	0	-1.64722
BnaC06g34130D	0	0	0	0	-1.42696	-1.64669
BnaAnng16850D	0	0	0	0	0	-1.64668
BnaC05g51310D	0	0	0	0	0	-1.64336
BnaA09g44470D	0	0	0	0	0	-1.63965
BnaA01g02570D	0	0	0	0	0	-1.63912
BnaA09g48950D	0	0	0	0	0	-1.63821
BnaA06g12480D	0	0	0	0	0	-1.63723
BnaC09g01090D	0	0	0	0	0	-1.63605
BnaA06g11670D	0	0	0	0	0	-1.63507
BnaC07g06390D	0	0	0	0	0	-1.63236
BnaC07g44000D	0	0	0	0	0	-1.63061
BnaA04g11770D	0	0	0	0	0	-1.62813
BnaC08g37320D	0	0	0	0	0	-1.62805
BnaA01g11840D	0	0	0	0	0	-1.62767
BnaC08g05970D	0	0	0	0	0	-1.62212
BnaC05g40060D	0	0	0	0	0	-1.62167
BnaA09g53810D	0	0	0	0	0	-1.61974
BnaC09g48030D	0	0	0	0	0	-1.61861
BnaC09g27000D	0	0	0	0	0	-1.61679
BnaCnng35880D	0	0	0	0	0	-1.61668
BnaA03g38630D	0	0	0	0	2.03612	-1.61592
BnaA03g12810D	0	0	0	0	0	-1.61544
BnaA02g30490D	0	0	0	0	0	-1.61506
BnaA03g34850D	0	0	0	0	0	-1.61481
BnaC03g32310D	0	0	0	0	0	-1.61391
BnaC01g41070D	0	0	0	0	0	-1.61376
BnaA10g00990D	0	0	0	0	0	-1.61169
BnaC09g43750D	0	0	0	0	0	-1.61105
BnaA03g59990D	0	0	0	0	0	-1.61038
BnaA07g16800D	0	0	0	0	0	-1.60917
BnaA03g51290D	0	0	0	0	0	-1.60847
BnaC04g21400D	0	0	0	0	0	-1.60719
BnaC07g02390D	0	0	0	0	0	-1.60678
BnaC02g11090D	0	0	0	0	0	-1.60496
BnaA06g36160D	0	0	0	0	0	-1.60482
BnaAnng11700D	0	0	0	0	0	-1.6046
BnaC02g12740D	0	0	0	0	0	-1.603
BnaCnng52890D	0	0	0	0	0	-1.60275
BnaA03g25060D	0	0	0	0	0	-1.60081
BnaA07g25010D	0	0	0	0	0	-1.59914
BnaCnng63450D	0	0	0	0	0	-1.5986
BnaC09g39020D	0	0	0	0	0	-1.59678
BnaA04g23260D	0	0	0	0	0	-1.59653
BnaA10g27170D	0	0	0	0	0	-1.59426
BnaC05g37210D	0	0	0	0	0	-1.59423
BnaA01g06170D	0	0	0	0	0	-1.59276
BnaC03g54490D	0	0	0	0	0	-1.59266
BnaC07g50180D	0	0	0	0	0	-1.59151
BnaC07g42740D	0	0	0	0	0	-1.58958
BnaC08g29620D	0	0	0	0	0	-1.58877
BnaC06g35910D	0	0	0	0	0	-1.58852
BnaC03g26320D	0	0	0	0	0	-1.58793
BnaC07g31300D	0	0	0	0	0	-1.58716
BnaA03g08810D	0	0	0	0	0	-1.58661
BnaC08g28680D	0	0	0	0	0	-1.58571
BnaC01g07640D	0	0	0	0	0	-1.58567
BnaC02g44590D	0	0	0	0	0	-1.58437
BnaA05g03270D	0	0	0	0	0	-1.58385
BnaCnng24070D	0	0	0	0	0	-1.5833
BnaC05g45740D	0	0	0	0	0	-1.58213
BnaCnng06040D	0	0	0	0	0	-1.58089
BnaC06g35850D	0	0	0	0	0	-1.58066
BnaCnng30870D	0	0	0	0	0	-1.5801
BnaA09g48960D	0	0	0	0	0	-1.57945
BnaA02g34110D	0	0	0	0	0	-1.57801
BnaA09g04910D	0	0	0	0	0	-1.57738
BnaC03g26570D	0	0	0	0	0	-1.57682
BnaA01g14870D	0	0	0	0	0	-1.57575
BnaA03g05790D	0	0	0	0	0	-1.57549
BnaC05g08220D	0	0	0	0	0	-1.57444
BnaC03g30140D	0	0	0	0	0	-1.57434
BnaC07g27760D	0	0	0	0	0	-1.57418
BnaC03g48570D	0	0	0	0	0	-1.57407
BnaA02g30190D	0	0	0	0	0	-1.57375
BnaA03g43960D	0	0	0	0	0	-1.5732
BnaA07g35520D	0	0	0	0	0	-1.57314
BnaC04g04130D	0	0	0	0	0	-1.57246
BnaA08g22530D	0	0	0	0	0	-1.57209
BnaC07g29940D	0	0	0	0	0	-1.57202
BnaA09g06030D	0	0	0	0	0	-1.57147
BnaC07g43050D	0	0	0	0	0	-1.57146
BnaC07g08370D	0	0	0	0	0	-1.57103
BnaA01g05410D	0	0	0	0	0	-1.57057
BnaCnng54050D	0	0	0	0	0	-1.56944
BnaC01g11500D	0	0	0	0	0	-1.56933
BnaC03g22790D	0	0	0	0	0	-1.5684
BnaC05g45300D	0	0	0	0	0	-1.56712
BnaA03g00770D	0	0	0	0	0	-1.56475
BnaC06g32970D	0	0	0	0	0	-1.56409
BnaC07g35860D	0	0	0	0	0	-1.56047
BnaA07g20400D	0	0	0	0	0	-1.56017
BnaA06g40360D	0	0	0	0	0	-1.55915
BnaA05g01450D	0	0	0	0	0	-1.55878
BnaA07g16660D	0	0	0	0	0	-1.5581
BnaCnng38940D	0	0	0	0	0	-1.5573
BnaA09g02420D	0	0	0	0	0	-1.55689
BnaA04g25470D	0	0	0	0	0	-1.55594
BnaA06g38800D	0	0	0	0	0	-1.55526
BnaC06g06170D	0	0	0	0	0	-1.55503
BnaA03g52800D	0	0	0	0	0	-1.55467
BnaA03g40550D	0	0	0	0	0	-1.5531
BnaA03g30400D	0	0	0	0	0	-1.55275
BnaA07g16700D	0	0	0	0	0	-1.5522
BnaC07g22410D	0	0	0	0	0	-1.55219
BnaAnng09370D	0	0	0	0	0	-1.551
BnaC03g34010D	0	0	0	0	0	-1.55073
BnaA07g26510D	0	0	0	0	0	-1.54833
BnaA05g07580D	0	0	0	0	0	-1.54825
BnaA10g01180D	0	0	0	0	0	-1.54715
BnaA01g25950D	0	0	0	0	0	-1.54712
BnaA10g28210D	0	0	0	0	0	-1.54459
BnaA06g08090D	0	0	0	0	0	-1.54393
BnaA09g15520D	0	0	0	0	0	-1.54303
BnaA09g36960D	0	0	0	0	0	-1.54236
BnaA04g25040D	0	0	0	0	0	-1.54209
BnaA10g03990D	0	0	0	0	0	-1.54157
BnaC01g13470D	0	0	0	0	0	-1.54093
BnaCnng69490D	0	0	0	0	0	-1.54022
BnaA09g15720D	0	0	0	0	0	-1.54006
BnaC07g19260D	0	0	0	0	0	-1.53782
BnaC04g36020D	0	0	0	0	0	-1.53646
BnaC09g05510D	0	0	0	0	0	-1.53519
BnaA06g31930D	0	0	0	0	0	-1.53452
BnaA03g16160D	0	0	0	0	0	-1.53391
BnaA07g23670D	0	0	0	0	0	-1.5332
BnaC09g45580D	0	0	0	0	0	-1.5332
BnaA02g23870D	0	0	0	0	0	-1.53207
BnaC04g36630D	0	0	0	0	0	-1.53108
BnaA03g23610D	0	0	0	0	0	-1.53096
BnaC05g40790D	0	0	0	0	0	-1.52921
BnaCnng66930D	0	0	0	0	0	-1.52914
BnaA10g23430D	0	0	0	0	0	-1.52846
BnaA03g55480D	0	0	0	0	0	-1.5254
BnaA07g07500D	0	0	0	0	0	-1.52338
BnaA04g01730D	0	0	0	0	0	-1.52333
BnaA02g12880D	0	0	0	0	0	-1.52308
BnaA09g05510D	0	0	0	0	0	-1.52239
BnaAnng06950D	0	0	0	0	0	-1.5217
BnaC07g23300D	0	0	0	0	0	-1.51991
BnaC05g43230D	0	0	0	0	0	-1.51924
BnaCnng36050D	0	0	0	0	0	-1.51894
BnaC01g37590D	0	0	0	0	-1.52073	-1.51875
BnaA01g12190D	0	0	0	0	0	-1.51874
BnaCnng13770D	0	0	0	0	0	-1.51783
BnaA05g02000D	0	0	0	0	0	-1.51776
BnaCnng64490D	0	0	0	0	-1.24202	-1.51668
BnaC03g62970D	0	0	0	0	0	-1.51588
BnaA10g20730D	0	0	0	0	0	-1.51366
BnaA04g11410D	0	0	0	0	0	-1.51337
BnaCnng45910D	0	0	0	0	0	-1.51234
BnaA01g00150D	0	0	0	0	0	-1.51175
BnaC04g02190D	0	0	0	0	0	-1.51072
BnaA01g22460D	0	0	0	0	0	-1.51023
BnaA01g22670D	0	0	0	0	0	-1.50968
BnaC02g37020D	0	0	0	0	0	-1.5092
BnaC03g70280D	0	0	0	0	0	-1.50904
BnaC07g46660D	0	0	0	0	0	-1.5085
BnaC05g47950D	0	0	0	0	0	-1.50795
BnaA05g04600D	0	0	0	0	0	-1.50606
BnaA01g05270D	0	0	0	0	0	-1.50593
BnaA01g13220D	0	0	0	0	0	-1.50418
BnaC01g03510D	0	0	0	0	0	-1.50188
BnaC09g11090D	0	0	0	0	0	-1.50172
BnaA09g12360D	0	0	0	0	0	-1.50144
BnaC01g00120D	0	0	0	0	0	-1.5006
BnaC07g13370D	0	0	0	0	0	-1.50041
BnaA07g10530D	0	0	0	0	0	-1.49981
BnaA03g27300D	0	0	0	0	0	-1.49943
BnaA08g24930D	0	0	0	0	0	-1.49857
BnaC01g32810D	0	0	0	0	0	-1.49771
BnaA05g31150D	0	0	0	0	0	-1.49671
BnaC03g78000D	0	0	0	0	0	-1.49564
BnaC01g41000D	0	0	0	0	0	-1.4936
BnaC01g08230D	0	0	0	0	0	-1.49281
BnaA08g12410D	0	0	0	0	0	-1.49265
BnaA03g41830D	0	0	0	0	0	-1.49219
BnaA09g17120D	0	0	0	0	0	-1.49098
BnaA08g29650D	0	0	0	0	0	-1.49082
BnaAnng20880D	0	0	0	0	0	-1.49061
BnaA05g31200D	0	0	0	0	0	-1.48902
BnaC07g23610D	0	0	0	0	0	-1.48876
BnaA06g06000D	0	0	0	0	-1.26871	-1.48734
BnaA03g14550D	0	0	0	0	-1.32486	-1.48708
BnaCnng10940D	0	0	0	0	0	-1.48582
BnaC01g07450D	0	0	0	0	0	-1.48495
BnaC08g39700D	0	0	0	0	0	-1.48473
BnaA06g37340D	0	0	0	0	0	-1.4844
BnaA04g16260D	0	0	0	0	0	-1.48437
BnaCnng57860D	0	0	0	0	0	-1.4827
BnaC05g08120D	0	0	0	0	0	-1.48264
BnaC02g09720D	0	0	0	0	0	-1.48225
BnaA03g27330D	0	0	0	0	0	-1.48215
BnaC09g25860D	0	0	0	0	0	-1.48001
BnaA05g36120D	0	0	0	0	0	-1.47975
BnaC09g16940D	0	0	0	0	0	-1.47899
BnaA08g23740D	0	0	0	0	0	-1.47741
BnaC09g19940D	0	0	0	0	0	-1.4771
BnaA04g00820D	0	0	0	0	0	-1.47572
BnaA02g09840D	0	0	0	0	0	-1.47525
BnaA02g01730D	0	0	0	0	0	-1.47483
BnaA07g29720D	0	0	0	0	0	-1.47413
BnaA05g27860D	0	0	0	0	0	-1.47385
BnaC07g41210D	0	0	0	0	0	-1.47207
BnaA01g10230D	0	0	0	0	0	-1.47198
BnaC09g50460D	0	0	0	0	0	-1.47185
BnaA05g30760D	0	0	0	0	0	-1.47156
BnaC07g15380D	0	0	0	0	0	-1.4686
BnaA03g56350D	0	0	0	0	0	-1.4675
BnaA03g21760D	0	0	0	0	0	-1.46692
BnaC03g27610D	0	0	0	0	0	-1.46692
BnaA05g16450D	0	0	0	0	0	-1.46686
BnaC04g40080D	0	0	0	0	0	-1.46658
BnaC07g46690D	0	0	0	0	0	-1.46583
BnaA03g22020D	0	0	0	0	0	-1.46557
BnaC02g39080D	0	0	0	0	0	-1.46514
BnaC07g02020D	0	0	0	0	0	-1.46406
BnaCnng47330D	0	0	0	0	0	-1.46381
BnaC09g48100D	0	0	0	0	0	-1.46336
BnaC03g21820D	0	0	0	0	0	-1.46302
BnaA07g11240D	0	0	0	0	0	-1.46261
BnaA02g19500D	0	0	0	0	0	-1.46182
BnaCnng24110D	0	0	0	0	0	-1.46171
BnaC08g24890D	0	0	0	0	0	-1.46146
BnaA01g22500D	0	0	0	0	0	-1.46129
BnaCnng43110D	0	0	0	0	0	-1.46047
BnaC02g24840D	0	0	0	0	0	-1.45845
BnaA09g50090D	0	0	0	0	0	-1.45624
BnaA05g15910D	0	0	0	0	0	-1.4551
BnaA07g10170D	0	0	0	0	0	-1.45501
BnaC01g43600D	0	0	0	0	0	-1.455
BnaC05g13520D	0	0	0	0	0	-1.45422
BnaA01g11930D	0	0	0	0	0	-1.45405
BnaC05g11410D	0	0	0	0	0	-1.4537
BnaA10g09660D	0	0	0	0	0	-1.45333
BnaC07g47590D	0	0	0	0	0	-1.45319
BnaA04g14230D	0	0	0	0	0	-1.45267
BnaC08g25210D	0	0	0	0	0	-1.44811
BnaC02g18910D	0	0	0	0	0	-1.44808
BnaC05g01100D	0	0	0	0	0	-1.4472
BnaA03g49570D	0	0	0	0	0	-1.4469
BnaC08g28030D	0	0	0	0	0	-1.44661
BnaA03g43210D	0	0	0	0	0	-1.44624
BnaA08g19770D	0	0	0	0	0	-1.4433
BnaC03g28030D	0	0	0	0	0	-1.44243
BnaC03g74010D	0	0	0	0	0	-1.44234
BnaA09g40120D	0	0	0	0	0	-1.44023
BnaA09g31010D	0	0	0	0	0	-1.44008
BnaCnng25620D	0	0	0	0	0	-1.44006
BnaA09g39000D	0	0	0	0	0	-1.44005
BnaC02g19780D	0	0	0	0	0	-1.43668
BnaA06g37040D	0	0	0	0	0	-1.43625
BnaA01g01320D	0	0	0	0	0	-1.43531
BnaC02g22590D	0	0	0	0	0	-1.4345
BnaC07g35250D	0	0	0	0	0	-1.43139
BnaA10g02870D	0	0	0	0	0	-1.42971
BnaC03g60050D	0	0	0	0	0	-1.42961
BnaA01g09890D	0	0	0	0	0	-1.4296
BnaA09g52130D	0	0	0	0	0	-1.42949
BnaA08g22410D	0	0	0	0	0	-1.42898
BnaC06g39440D	0	0	0	0	0	-1.42827
BnaC03g59080D	0	0	0	0	0	-1.4272
BnaC09g49180D	0	0	0	0	0	-1.42478
BnaA02g31380D	0	0	0	0	0	-1.42417
BnaA06g03540D	0	0	0	0	0	-1.42407
BnaC08g32920D	0	0	0	0	0	-1.42356
BnaC03g72310D	0	0	0	0	0	-1.4235
BnaC06g01430D	0	0	0	0	0	-1.42077
BnaC09g26400D	0	0	0	0	0	-1.42025
BnaCnng26370D	0	0	0	0	0	-1.42009
BnaC09g08020D	0	0	0	0	0	-1.41925
BnaA08g31010D	0	0	0	0	0	-1.41924
BnaA05g04510D	0	0	0	0	0	-1.41919
BnaA07g18810D	0	0	0	0	0	-1.41886
BnaA02g29970D	0	0	0	0	0	-1.41855
BnaC09g22320D	0	0	0	0	0	-1.41788
BnaA03g21210D	0	0	0	0	0	-1.41722
BnaAnng40470D	0	0	0	0	0	-1.41691
BnaC05g02780D	0	0	0	0	0	-1.41674
BnaA10g13800D	0	0	0	0	0	-1.41669
BnaA02g31570D	0	0	0	0	0	-1.41571
BnaA06g37910D	0	0	0	0	0	-1.41526
BnaC07g21270D	0	0	0	0	0	-1.41103
BnaC07g34510D	0	0	0	0	0	-1.411
BnaA10g16590D	0	0	0	0	0	-1.41093
BnaC05g02700D	0	0	0	0	0	-1.41052
BnaA03g55050D	0	0	0	0	0	-1.40914
BnaC08g10150D	0	0	0	0	0	-1.40824
BnaA02g20890D	0	0	0	0	0	-1.40757
BnaC04g54460D	0	0	0	0	0	-1.40724
BnaC01g03560D	0	0	0	0	0	-1.40709
BnaAnng08880D	0	0	0	0	0	-1.40639
BnaC04g40390D	0	0	0	0	0	-1.40552
BnaC07g17610D	0	0	0	0	0	-1.40444
BnaA09g47060D	0	0	0	0	0	-1.40375
BnaA06g07410D	0	0	0	0	0	-1.40311
BnaC04g47840D	0	0	0	0	0	-1.40272
BnaA07g02540D	0	0	0	0	0	-1.40251
BnaC08g09190D	0	0	0	0	0	-1.3997
BnaA10g22060D	0	0	0	0	0	-1.39886
BnaA09g13190D	0	0	0	0	0	-1.39873
BnaAnng11870D	0	0	0	0	0	-1.39758
BnaC06g39540D	0	0	0	0	0	-1.39699
BnaA08g29950D	0	0	0	0	0	-1.39638
BnaA04g13840D	0	0	0	0	0	-1.39562
BnaA05g02300D	0	0	0	0	0	-1.39511
BnaA06g02520D	0	0	0	0	0	-1.39505
BnaA08g12060D	0	0	0	0	0	-1.39463
BnaC09g30710D	0	0	0	0	0	-1.39455
BnaA08g25610D	0	0	0	0	0	-1.39436
BnaC05g09460D	0	0	0	0	0	-1.39405
BnaC03g10290D	0	0	0	0	0	-1.39391
BnaC08g18160D	0	0	0	0	0	-1.39311
BnaA01g05290D	0	0	0	0	0	-1.39295
BnaA02g35780D	0	0	0	0	0	-1.39288
BnaC04g33120D	0	0	0	0	0	-1.39257
BnaC03g46570D	0	0	0	0	0	-1.39171
BnaC09g44690D	0	0	0	0	0	-1.39125
BnaA02g07990D	0	0	0	0	0	-1.3906
BnaC07g00210D	0	0	0	0	0	-1.39043
BnaA06g36370D	0	0	0	0	0	-1.38865
BnaA10g26350D	0	0	0	0	0	-1.38847
BnaC02g28050D	0	0	0	0	0	-1.38839
BnaC05g44660D	0	0	0	0	0	-1.38795
BnaC04g35190D	0	0	0	0	0	-1.3878
BnaCnng52620D	0	0	0	0	0	-1.38761
BnaA10g05520D	0	0	0	0	0	-1.38663
BnaC04g45420D	0	0	0	0	0	-1.38595
BnaA09g54940D	0	0	0	0	0	-1.38585
BnaC03g08460D	0	0	0	0	0	-1.38509
BnaA01g33120D	0	0	0	0	0	-1.38494
BnaA06g23560D	0	0	0	0	0	-1.38436
BnaA04g29570D	0	0	0	0	0	-1.38307
BnaA09g37160D	0	0	0	0	0	-1.38266
BnaA03g32610D	0	0	0	0	0	-1.38251
BnaC05g48460D	0	0	0	0	0	-1.3816
BnaA02g33920D	0	0	0	0	0	-1.3812
BnaA07g21910D	0	0	0	0	0	-1.38051
BnaA03g02250D	0	0	0	0	0	-1.37952
BnaC05g45690D	0	0	0	0	0	-1.37888
BnaA09g15440D	0	0	0	0	0	-1.37837
BnaA05g18100D	0	0	0	0	0	-1.37832
BnaC02g48700D	0	0	0	0	0	-1.37758
BnaC06g39000D	0	0	0	0	0	-1.37513
BnaA04g14490D	0	0	0	0	0	-1.37486
BnaC09g32610D	0	0	0	0	0	-1.37407
BnaC06g43960D	0	0	0	0	0	-1.37395
BnaA08g09350D	0	0	0	0	0	-1.3724
BnaC04g40820D	0	0	0	0	0	-1.37015
BnaCnng38460D	0	0	0	0	0	-1.37007
BnaA05g31420D	0	0	0	0	0	-1.36865
BnaA07g01940D	0	0	0	0	0	-1.36795
BnaA03g05840D	0	0	0	0	0	-1.36591
BnaA07g07550D	0	0	0	0	0	-1.3655
BnaA01g09140D	0	0	0	0	0	-1.36514
BnaA01g25000D	0	0	0	0	0	-1.36285
BnaC09g47230D	0	0	0	0	0	-1.36238
BnaA09g40110D	0	0	0	0	0	-1.36146
BnaC09g13680D	0	0	0	0	0	-1.35938
BnaA08g17650D	0	0	0	0	0	-1.35818
BnaA06g37900D	0	0	0	0	0	-1.35742
BnaC07g37060D	0	0	0	0	0	-1.35727
BnaC02g03290D	0	0	0	0	0	-1.35644
BnaA03g58750D	0	0	0	0	0	-1.3558
BnaC03g52910D	0	0	0	0	0	-1.35349
BnaA06g22890D	0	0	0	0	0	-1.35338
BnaC01g14590D	0	0	0	0	0	-1.35269
BnaA03g37660D	0	0	0	0	0	-1.35186
BnaA03g55080D	0	0	0	0	0	-1.35128
BnaA10g03060D	0	0	0	0	0	-1.35094
BnaA08g16080D	0	0	0	0	0	-1.34937
BnaCnng01390D	0	0	0	0	0	-1.34826
BnaC09g48700D	0	0	0	0	0	-1.34772
BnaA02g12330D	0	0	0	0	0	-1.34679
BnaA07g23080D	0	0	0	0	0	-1.34666
BnaA07g17130D	0	0	0	0	0	-1.34646
BnaA02g27980D	0	0	0	0	0	-1.34553
BnaC04g39530D	0	0	0	0	0	-1.34277
BnaC01g11740D	0	0	0	0	0	-1.34193
BnaA07g21710D	0	0	0	0	0	-1.34159
BnaA01g13040D	0	0	0	0	0	-1.34057
BnaC07g43200D	0	0	0	0	0	-1.34016
BnaA09g29660D	0	0	0	0	0	-1.3401
BnaA09g12900D	0	0	0	0	0	-1.33962
BnaCnng38040D	0	0	0	0	0	-1.33955
BnaA10g04730D	0	0	0	0	0	-1.33881
BnaC02g15050D	0	0	0	0	0	-1.33792
BnaA08g22240D	0	0	0	0	0	-1.33693
BnaA10g12820D	0	0	0	0	0	-1.33675
BnaA07g34690D	0	0	0	0	0	-1.33664
BnaAnng35580D	0	0	0	0	-2.14777	-1.33657
BnaA05g11020D	0	0	0	0	0	-1.33649
BnaA03g36640D	0	0	0	0	0	-1.33628
BnaC07g18710D	0	0	0	0	0	-1.33492
BnaC09g04080D	0	0	0	0	0	-1.33416
BnaA03g18830D	0	0	0	0	0	-1.33382
BnaA08g28670D	0	0	0	0	0	-1.33288
BnaC04g11250D	0	0	0	0	0	-1.33161
BnaC05g05070D	0	0	0	0	0	-1.33117
BnaC05g50050D	0	0	0	0	0	-1.33066
BnaC08g28970D	0	0	0	0	0	-1.3306
BnaC07g18380D	0	0	0	0	0	-1.3286
BnaA01g01140D	0	0	0	0	0	-1.32768
BnaA03g09600D	0	0	0	0	0	-1.32701
BnaCnng38120D	0	0	0	0	0	-1.32681
BnaA01g14860D	0	0	0	0	0	-1.32587
BnaA03g45080D	0	0	0	0	0	-1.32587
BnaC07g38350D	0	0	0	0	0	-1.32499
BnaA08g21160D	0	0	0	0	0	-1.32231
BnaC03g76640D	0	0	0	0	0	-1.32155
BnaAnng12320D	0	0	0	0	0	-1.32138
BnaC03g20630D	0	0	0	0	0	-1.32108
BnaA07g32400D	0	0	0	0	0	-1.31928
BnaC03g30050D	0	0	0	0	0	-1.31909
BnaC02g26240D	0	0	0	0	0	-1.31744
BnaA05g06080D	0	0	0	0	0	-1.31574
BnaC04g12840D	0	0	0	0	0	-1.31543
BnaAnng14200D	0	0	0	0	0	-1.31455
BnaA02g05840D	0	0	0	0	0	-1.31238
BnaC09g25070D	0	0	0	0	0	-1.31204
BnaA06g23800D	0	0	0	0	0	-1.31196
BnaA09g05930D	0	0	0	0	0	-1.31121
BnaAnng35300D	0	0	0	0	0	-1.31116
BnaA06g40330D	0	0	0	0	0	-1.31074
BnaA09g07080D	0	0	0	0	0	-1.30995
BnaC03g51740D	0	0	0	0	0	-1.30846
BnaC07g32100D	0	0	0	0	0	-1.30812
BnaC03g24380D	0	0	0	0	0	-1.30804
BnaA03g08820D	0	0	0	0	0	-1.30803
BnaCnng34030D	0	0	0	0	0	-1.30654
BnaA04g28330D	0	0	0	0	0	-1.30628
BnaA07g12700D	0	0	0	0	0	-1.30598
BnaC03g68600D	0	0	0	0	0	-1.30585
BnaA05g36400D	0	0	0	0	0	-1.30535
BnaA07g10320D	0	0	0	0	0	-1.30271
BnaC04g19270D	0	0	0	0	0	-1.3026
BnaA06g04030D	0	0	0	0	0	-1.30167
BnaC03g34830D	0	0	0	0	0	-1.30049
BnaCnng03370D	0	0	0	0	0	-1.30014
BnaA03g23330D	0	0	0	0	0	-1.29948
BnaCnng14480D	0	0	0	0	0	-1.29886
BnaA03g21040D	0	0	0	0	0	-1.2984
BnaA06g38110D	0	0	0	0	0	-1.298
BnaA02g22810D	0	0	0	0	0	-1.29768
BnaC06g16100D	0	0	0	0	0	-1.29721
BnaAnng07600D	0	0	0	0	0	-1.29581
BnaA09g16590D	0	0	0	0	0	-1.29566
BnaAnng30860D	0	0	0	0	0	-1.29562
BnaC09g36350D	0	0	0	0	0	-1.29475
BnaA08g14220D	0	0	0	0	0	-1.29466
BnaC01g09930D	0	0	0	0	0	-1.29437
BnaA06g33450D	0	0	0	0	0	-1.29429
BnaA02g05040D	0	0	0	0	0	-1.29351
BnaA03g45950D	0	0	0	0	0	-1.29236
BnaA07g24830D	0	0	0	0	0	-1.29089
BnaC01g14990D	0	0	0	0	0	-1.29049
BnaC04g46140D	0	0	0	0	0	-1.29033
BnaA03g47600D	0	0	0	0	0	-1.29006
BnaAnng13830D	0	0	0	0	0	-1.28965
BnaAnng29830D	0	0	0	0	0	-1.2894
BnaC03g51850D	0	0	0	0	0	-1.28771
BnaC03g63410D	0	0	0	0	0	-1.2863
BnaC05g04430D	0	0	0	0	0	-1.28504
BnaC04g35930D	0	0	0	0	0	-1.28326
BnaA08g30700D	0	0	0	0	0	-1.28166
BnaA10g02690D	0	0	0	0	0	-1.28085
BnaA09g47420D	0	0	0	0	0	-1.27841
BnaC06g30760D	0	0	0	0	0	-1.27651
BnaC03g50490D	0	0	0	0	0	-1.27604
BnaC03g38320D	0	0	0	0	0	-1.27544
BnaA08g00080D	0	0	0	0	0	-1.27535
BnaC09g33650D	0	0	0	0	0	-1.27473
BnaA10g16940D	0	0	0	0	0	-1.27436
BnaA04g13550D	0	0	0	0	0	-1.27313
BnaC04g07870D	0	0	0	0	0	-1.27145
BnaA09g08700D	0	0	0	0	0	-1.26923
BnaC09g46440D	0	0	0	0	0	-1.26863
BnaA04g21820D	0	0	0	0	0	-1.26781
BnaC03g08260D	0	0	0	0	0	-1.26768
BnaC07g03940D	0	0	0	0	0	-1.26735
BnaCnng17780D	0	0	0	0	0	-1.26619
BnaA06g10110D	0	0	0	0	0	-1.26589
BnaAnng31570D	0	0	0	0	0	-1.26358
BnaC02g13190D	0	0	0	0	0	-1.26358
BnaC09g49710D	0	0	0	0	0	-1.26232
BnaC05g02520D	0	0	0	0	0	-1.26174
BnaC01g20230D	0	0	0	0	0	-1.26098
BnaC07g22840D	0	0	0	0	0	-1.26082
BnaC04g01640D	0	0	0	0	0	-1.26034
BnaC04g02880D	0	0	0	0	0	-1.26025
BnaC03g26480D	0	0	0	0	0	-1.25918
BnaA05g12320D	0	0	0	0	0	-1.25886
BnaC01g03210D	0	0	0	0	0	-1.25827
BnaA07g16060D	0	0	0	0	0	-1.25814
BnaA05g19230D	0	0	0	0	0	-1.25729
BnaCnng25850D	0	0	0	0	0	-1.25674
BnaA05g03420D	0	0	0	0	0	-1.25599
BnaC09g36490D	0	0	0	0	0	-1.25523
BnaA06g26150D	0	0	0	0	0	-1.25438
BnaA08g25280D	0	0	0	0	0	-1.25336
BnaA07g31980D	0	0	0	0	0	-1.25312
BnaC02g38230D	0	0	0	0	0	-1.25259
BnaCnng08720D	0	0	0	0	0	-1.25211
BnaC07g30970D	0	0	0	0	0	-1.25171
BnaA03g39380D	0	0	0	0	0	-1.25113
BnaA02g09700D	0	0	0	0	0	-1.25005
BnaC05g30650D	0	0	0	0	0	-1.24971
BnaA03g49910D	0	0	0	0	0	-1.24955
BnaC06g24320D	0	0	0	0	0	-1.249
BnaA01g28460D	0	0	0	0	0	-1.24888
BnaC09g02880D	0	0	0	0	0	-1.24733
BnaA03g51830D	0	0	0	0	0	-1.2473
BnaA02g02290D	0	0	0	0	0	-1.2472
BnaA08g21240D	0	0	0	0	0	-1.24684
BnaA10g01400D	0	0	0	0	0	-1.24583
BnaA04g19190D	0	0	0	0	0	-1.24569
BnaA05g08250D	0	0	0	0	0	-1.24562
BnaA01g35130D	0	0	0	0	0	-1.24444
BnaA08g30320D	0	0	0	0	0	-1.24437
BnaA08g10790D	0	0	0	0	0	-1.24291
BnaC04g43580D	0	0	0	0	0	-1.23982
BnaC07g43360D	0	0	0	0	0	-1.23895
BnaC02g06200D	0	0	0	0	0	-1.23829
BnaCnng36960D	0	0	0	0	0	-1.23687
BnaC07g47170D	0	0	0	0	0	-1.23684
BnaC08g08040D	0	0	0	0	0	-1.23608
BnaC08g34510D	0	0	0	0	0	-1.23524
BnaC02g15500D	0	0	0	0	0	-1.23472
BnaC03g24270D	0	0	0	0	0	-1.23433
BnaC08g25680D	0	0	0	0	0	-1.2342
BnaA05g31120D	0	0	0	0	0	-1.23331
BnaA05g20800D	0	0	0	0	0	-1.23319
BnaC04g08930D	0	0	0	0	0	-1.23301
BnaA01g14720D	0	0	0	0	0	-1.23164
BnaA03g06610D	0	0	0	0	0	-1.23121
BnaC03g48650D	0	0	0	0	0	-1.23113
BnaC05g00620D	0	0	0	0	0	-1.23109
BnaC06g38840D	0	0	0	0	0	-1.23066
BnaC06g16790D	0	0	0	0	0	-1.23025
BnaC08g49200D	0	0	0	0	0	-1.2294
BnaA03g12700D	0	0	0	0	0	-1.22913
BnaC05g44980D	0	0	0	0	0	-1.22823
BnaA07g24560D	0	0	0	0	0	-1.22815
BnaC07g26130D	0	0	0	0	0	-1.22775
BnaA08g00360D	0	0	0	0	0	-1.22741
BnaC07g37320D	0	0	0	0	0	-1.22714
BnaA06g36630D	0	0	0	0	0	-1.22662
BnaC02g14950D	0	0	0	0	0	-1.22645
BnaC09g19560D	0	0	0	0	0	-1.22611
BnaAnng02890D	0	0	0	0	0	-1.22567
BnaC02g33410D	0	0	0	0	0	-1.22532
BnaC04g28590D	0	0	0	0	0	-1.22361
BnaC02g24380D	0	0	0	0	0	-1.2235
BnaA06g02700D	0	0	0	0	0	-1.22324
BnaC09g43510D	0	0	0	0	0	-1.22221
BnaA08g17170D	0	0	0	0	0	-1.22211
BnaC01g06150D	0	0	0	0	0	-1.22201
BnaC05g01720D	0	0	0	0	0	-1.22153
BnaC06g20260D	0	0	0	0	0	-1.22149
BnaC08g11100D	0	0	0	0	0	-1.2212
BnaC01g44580D	0	0	0	0	0	-1.21911
BnaC03g35770D	0	0	0	0	0	-1.21893
BnaCnng30140D	0	0	0	0	0	-1.21823
BnaA06g28960D	0	0	0	0	0	-1.21818
BnaC04g09020D	0	0	0	0	0	-1.218
BnaC05g43070D	0	0	0	0	0	-1.21705
BnaA02g05780D	0	0	0	0	0	-1.21633
BnaC05g28510D	0	0	0	0	0	-1.21554
BnaC05g05370D	0	0	0	0	0	-1.21205
BnaAnng31940D	0	0	0	0	0	-1.2076
BnaAnng22230D	0	0	0	0	0	-1.20714
BnaCnng60400D	0	0	0	0	0	-1.20649
BnaC09g23090D	0	0	0	0	0	-1.20544
BnaA05g16680D	0	0	0	0	0	-1.20506
BnaA02g09460D	0	0	0	0	0	-1.20454
BnaCnng17230D	0	0	0	0	0	-1.20432
BnaCnng07310D	0	0	0	0	0	-1.20397
BnaC09g17180D	0	0	0	0	0	-1.20382
BnaA03g00640D	0	0	0	0	0	-1.20323
BnaC01g13790D	0	0	0	0	0	-1.20314
BnaA09g54200D	0	0	0	0	0	-1.20292
BnaA02g33770D	0	0	0	0	0	-1.20135
BnaC03g00160D	0	0	0	0	-1.16928	-1.19987
BnaA09g39040D	0	0	0	0	0	-1.19878
BnaC05g05020D	0	0	0	0	0	-1.1986
BnaA02g29480D	0	0	0	0	0	-1.19857
BnaA05g05600D	0	0	0	0	0	-1.19802
BnaA08g20030D	0	0	0	0	0	-1.198
BnaC04g45930D	0	0	0	0	0	-1.19788
BnaAnng04800D	0	0	0	0	0	-1.19561
BnaA05g19760D	0	0	0	0	0	-1.19542
BnaA05g23420D	0	0	0	0	0	-1.1934
BnaA04g09880D	0	0	0	0	0	-1.19226
BnaC07g16450D	0	0	0	0	0	-1.19165
BnaC03g26400D	0	0	0	0	0	-1.19102
BnaA08g25120D	0	0	0	0	0	-1.19068
BnaC03g76010D	0	0	0	0	0	-1.18844
BnaA10g07350D	0	0	0	0	0	-1.18783
BnaC05g12180D	0	0	0	0	0	-1.18743
BnaA03g47610D	0	0	0	0	0	-1.18677
BnaA08g21050D	0	0	0	0	0	-1.18661
BnaA06g26320D	0	0	0	0	0	-1.18649
BnaA10g23080D	0	0	0	0	0	-1.18633
BnaC05g17260D	0	0	0	0	0	-1.18588
BnaA01g10530D	0	0	0	0	0	-1.18539
BnaA08g21800D	0	0	0	0	0	-1.18537
BnaC01g39020D	0	0	0	0	0	-1.18454
BnaA10g20840D	0	0	0	0	0	-1.18316
BnaA10g02550D	0	0	0	0	0	-1.18168
BnaA01g27570D	0	0	0	0	0	-1.18104
BnaC07g13570D	0	0	0	0	0	-1.18093
BnaA03g40200D	0	0	0	0	0	-1.18009
BnaA05g01870D	0	0	0	0	0	-1.1798
BnaC03g63740D	0	0	0	0	0	-1.17931
BnaC05g07550D	0	0	0	0	0	-1.17831
BnaC04g00780D	0	0	0	0	0	-1.17817
BnaC06g36860D	0	0	0	0	0	-1.17809
BnaA04g05160D	0	0	0	0	0	-1.17764
BnaC03g51560D	0	0	0	0	0	-1.17758
BnaA03g39930D	0	0	0	0	0	-1.17678
BnaA10g04390D	0	0	0	0	0	-1.17639
BnaC02g46880D	0	0	0	0	0	-1.17612
BnaA01g24820D	0	0	0	0	0	-1.17594
BnaC06g15850D	0	0	0	0	0	-1.17582
BnaA09g19320D	0	0	0	0	0	-1.17577
BnaA05g25910D	0	0	0	0	0	-1.17498
BnaC04g17230D	0	0	0	0	0	-1.1748
BnaC05g25340D	0	0	0	0	0	-1.17259
BnaCnng20470D	0	0	0	0	0	-1.17172
BnaA03g25540D	0	0	0	0	0	-1.17108
BnaC08g47290D	0	0	0	0	0	-1.17098
BnaA06g30600D	0	0	0	0	0	-1.17084
BnaC07g26560D	0	0	0	0	0	-1.17045
BnaC01g22100D	0	0	0	0	0	-1.16893
BnaA09g12110D	0	0	0	0	0	-1.16876
BnaAnng16810D	0	0	0	0	0	-1.1687
BnaC03g59570D	0	0	0	0	0	-1.16744
BnaC09g05250D	0	0	0	0	-1.2449	-1.16672
BnaCnng43100D	0	0	0	0	0	-1.16672
BnaA05g07040D	0	0	0	0	0	-1.16663
BnaA08g09180D	0	0	0	0	0	-1.16628
BnaC06g10440D	0	0	0	0	0	-1.16568
BnaC06g04310D	0	0	0	0	0	-1.16555
BnaA05g10140D	0	0	0	0	0	-1.16469
BnaA02g18080D	0	0	0	0	0	-1.16389
BnaA05g28470D	0	0	0	0	0	-1.16245
BnaC07g38410D	0	0	0	0	0	-1.16174
BnaC09g10570D	0	0	0	0	0	-1.16142
BnaAnng34880D	0	0	0	0	0	-1.16077
BnaA06g23070D	0	0	0	0	0	-1.15993
BnaCnng45920D	0	0	0	0	0	-1.15988
BnaC06g01490D	0	0	0	0	0	-1.1597
BnaA03g00400D	0	0	0	0	0	-1.15873
BnaA01g09150D	0	0	0	0	0	-1.15819
BnaC06g26160D	0	0	0	0	0	-1.15799
BnaA06g28870D	0	0	0	0	0	-1.15721
BnaA03g13190D	0	0	0	0	0	-1.1572
BnaC06g22430D	0	0	0	0	0	-1.15673
BnaA04g15310D	0	0	0	0	0	-1.1565
BnaC01g01710D	0	0	0	0	0	-1.15615
BnaCnng12360D	0	0	0	0	0	-1.15515
BnaA03g29810D	0	0	0	0	0	-1.1548
BnaA09g02240D	0	0	0	0	0	-1.15448
BnaA09g00980D	0	0	0	0	0	-1.15447
BnaC02g12390D	0	0	0	0	0	-1.15428
BnaC04g38040D	0	0	0	0	0	-1.15393
BnaCnng05860D	0	0	0	0	0	-1.15299
BnaA08g17160D	0	0	0	0	0	-1.15219
BnaCnng72260D	0	0	0	0	-1.60315	-1.15204
BnaC07g15930D	0	0	0	0	0	-1.15169
BnaC05g38530D	0	0	0	0	0	-1.15147
BnaC04g00980D	0	0	0	0	0	-1.15139
BnaC06g33630D	0	0	0	0	0	-1.15137
BnaA09g16830D	0	0	0	0	0	-1.15113
BnaA09g31890D	0	0	0	0	0	-1.15106
BnaA03g35510D	0	0	0	0	0	-1.15073
BnaA07g25630D	0	0	0	0	0	-1.15056
BnaC07g39880D	0	0	0	0	0	-1.14989
BnaA09g11510D	0	0	0	0	0	-1.14965
BnaC06g10100D	0	0	0	0	0	-1.14953
BnaC07g40890D	0	0	0	0	0	-1.14864
BnaCnng69330D	0	0	0	0	0	-1.14756
BnaA07g00650D	0	0	0	0	0	-1.1471
BnaAnng37130D	0	0	0	0	0	-1.14645
BnaC09g39200D	0	0	0	0	0	-1.14526
BnaA10g16440D	0	0	0	0	0	-1.14501
BnaA08g18600D	0	0	0	0	0	-1.14458
BnaC01g13870D	0	0	0	0	0	-1.14417
BnaA10g24260D	0	0	0	0	0	-1.14392
BnaA04g24200D	0	0	0	0	0	-1.14342
BnaC05g40920D	0	0	0	0	0	-1.14321
BnaA09g37590D	0	0	0	0	0	-1.1422
BnaCnng21680D	0	0	0	0	0	-1.14085
BnaC04g25100D	0	0	0	0	0	-1.13943
BnaC03g76710D	0	0	0	0	0	-1.13877
BnaC01g25850D	0	0	0	0	0	-1.13825
BnaA06g32480D	0	0	0	0	0	-1.13822
BnaA01g03830D	0	0	0	0	0	-1.138
BnaC07g09890D	0	0	0	0	0	-1.13798
BnaC04g47450D	0	0	0	0	0	-1.13416
BnaA02g13920D	0	0	0	0	0	-1.13354
BnaC05g51090D	0	0	0	0	0	-1.13247
BnaC01g10370D	0	0	0	0	0	-1.13236
BnaC02g36370D	0	0	0	0	0	-1.132
BnaA06g03080D	0	0	0	0	0	-1.13132
BnaC01g39900D	0	0	0	0	0	-1.13118
BnaA03g48950D	0	0	0	0	0	-1.13051
BnaC09g32560D	0	0	0	0	0	-1.12986
BnaC08g07930D	0	0	0	0	0	-1.12946
BnaC06g19090D	0	0	0	0	0	-1.12927
BnaC02g04950D	0	0	0	0	0	-1.12918
BnaA03g41350D	0	0	0	0	0	-1.12873
BnaA09g02190D	0	0	0	0	0	-1.12781
BnaA07g27660D	0	0	0	0	0	-1.12739
BnaA03g01440D	0	0	0	0	0	-1.12682
BnaA09g41490D	0	0	0	0	0	-1.12653
BnaA06g18060D	0	0	0	0	0	-1.12549
BnaC09g39230D	0	0	0	0	0	-1.12517
BnaA10g25060D	0	0	0	0	0	-1.12475
BnaC05g46680D	0	0	0	0	0	-1.12304
BnaA03g00090D	0	0	0	0	0	-1.12255
BnaC05g05380D	0	0	0	0	0	-1.12232
BnaC06g40890D	0	0	0	0	0	-1.12131
BnaC08g18320D	0	0	0	0	0	-1.12046
BnaC07g22680D	0	0	0	0	0	-1.12032
BnaC03g71520D	0	0	0	0	0	-1.11978
BnaC03g49850D	0	0	0	0	0	-1.11884
BnaC07g33430D	0	0	0	0	0	-1.11835
BnaC07g44690D	0	0	0	0	0	-1.11697
BnaC08g34280D	0	0	0	0	0	-1.11687
BnaC01g22950D	0	0	0	0	0	-1.11646
BnaA09g32030D	0	0	0	0	0	-1.11639
BnaA10g04210D	0	0	0	0	0	-1.11501
BnaC03g73370D	0	0	0	0	0	-1.11352
BnaA10g14830D	0	0	0	0	0	-1.11342
BnaC06g36760D	0	0	0	0	0	-1.1129
BnaC06g36040D	0	0	0	0	0	-1.11275
BnaA05g30840D	0	0	0	0	0	-1.11162
BnaA02g02460D	0	0	0	0	0	-1.11041
BnaC08g48840D	0	0	0	0	0	-1.10889
BnaC09g49990D	0	0	0	0	0	-1.10838
BnaA03g04390D	0	0	0	0	0	-1.10833
BnaC01g44960D	0	0	0	0	0	-1.10823
BnaC05g00430D	0	0	0	0	0	-1.10777
BnaC07g30590D	0	0	0	0	0	-1.10656
BnaA09g20370D	0	0	0	0	0	-1.10641
BnaC09g01400D	0	0	0	0	0	-1.1061
BnaA10g14510D	0	0	0	0	0	-1.10601
BnaC05g01470D	0	0	0	0	0	-1.10547
BnaC09g20370D	0	0	0	0	0	-1.10519
BnaC01g04710D	0	0	0	0	0	-1.1051
BnaA09g04210D	0	0	0	0	0	-1.10489
BnaC05g31450D	0	0	0	0	0	-1.10468
BnaC09g50960D	0	0	0	0	0	-1.10371
BnaCnng74350D	0	0	0	0	0	-1.10326
BnaA01g13130D	0	0	0	0	0	-1.10289
BnaA10g28120D	0	0	0	0	0	-1.10251
BnaA05g03470D	0	0	0	0	0	-1.10162
BnaA09g12960D	0	0	0	0	0	-1.10111
BnaC07g30750D	0	0	0	0	0	-1.10082
BnaA09g53930D	0	0	0	0	0	-1.1003
BnaC01g40040D	0	0	0	0	0	-1.10026
BnaA04g28670D	0	0	0	0	0	-1.09871
BnaA01g06780D	0	0	0	0	0	-1.09704
BnaC01g01660D	0	0	0	0	0	-1.09697
BnaA05g03020D	0	0	0	0	0	-1.09674
BnaC04g14940D	0	0	0	0	0	-1.09472
BnaC05g30170D	0	0	0	0	0	-1.09448
BnaC07g32530D	0	0	0	0	0	-1.09431
BnaC09g06340D	0	0	0	0	0	-1.09424
BnaA07g38460D	0	0	0	0	0	-1.0928
BnaC05g17350D	0	0	0	0	0	-1.09122
BnaA05g37270D	0	0	0	0	0	-1.09113
BnaC05g01440D	0	0	0	0	0	-1.09093
BnaCnng05460D	0	0	0	0	0	-1.08858
BnaC06g43210D	0	0	0	0	0	-1.08843
BnaAnng28270D	0	0	0	0	0	-1.08821
BnaA08g22590D	0	0	0	0	0	-1.08808
BnaC08g42010D	0	0	0	0	0	-1.08767
BnaC03g46510D	0	0	0	0	0	-1.08679
BnaA02g05360D	0	0	0	0	0	-1.08615
BnaC03g33030D	0	0	0	0	0	-1.08586
BnaC03g75630D	0	0	0	0	0	-1.08586
BnaA01g23660D	0	0	0	0	0	-1.08574
BnaC02g05960D	0	0	0	0	0	-1.08276
BnaA10g13850D	0	0	0	0	0	-1.08219
BnaCnng19090D	0	0	0	0	0	-1.08209
BnaA03g40670D	0	0	0	0	0	-1.08199
BnaC07g03990D	0	0	0	0	0	-1.08107
BnaA02g30200D	0	0	0	0	0	-1.08105
BnaA05g19250D	0	0	0	0	0	-1.08074
BnaA09g55660D	0	0	0	0	0	-1.08036
BnaA04g08040D	0	0	0	0	0	-1.07941
BnaCnng07570D	0	0	0	0	0	-1.07917
BnaC01g01690D	0	0	0	0	0	-1.07814
BnaA03g08720D	0	0	0	0	0	-1.07698
BnaA03g54960D	0	0	0	0	0	-1.07656
BnaC05g32750D	0	0	0	0	0	-1.07636
BnaC06g30340D	0	0	0	0	0	-1.07456
BnaA08g19950D	0	0	0	0	0	-1.07437
BnaA09g09840D	0	0	0	0	0	-1.07405
BnaA08g22390D	0	0	0	0	0	-1.07341
BnaA03g31290D	0	0	0	0	0	-1.07261
BnaC09g13570D	0	0	0	0	0	-1.07203
BnaC08g40010D	0	0	0	0	0	-1.07081
BnaA05g11980D	0	0	0	0	0	-1.07073
BnaA08g01690D	0	0	0	0	0	-1.07052
BnaA01g33220D	0	0	0	0	0	-1.07027
BnaA02g17850D	0	0	0	0	0	-1.07022
BnaC05g08810D	0	0	0	0	0	-1.06937
BnaC03g21320D	0	0	0	0	0	-1.06871
BnaCnng59870D	0	0	0	0	0	-1.06842
BnaC05g08650D	0	0	0	0	0	-1.06762
BnaAnng00020D	0	0	0	0	0	-1.06737
BnaC04g56640D	0	0	0	0	0	-1.06638
BnaC07g45200D	0	0	0	0	0	-1.06561
BnaC08g14300D	0	0	0	0	0	-1.06546
BnaC02g25900D	0	0	0	0	0	-1.06371
BnaA05g34640D	0	0	0	0	0	-1.06264
BnaC02g08540D	0	0	0	0	0	-1.0625
BnaC09g19610D	0	0	0	0	0	-1.06226
BnaA02g01870D	0	0	0	0	0	-1.06212
BnaC07g45310D	0	0	0	0	0	-1.06091
BnaC03g55150D	0	0	0	0	0	-1.06059
BnaC03g70400D	0	0	0	0	0	-1.0604
BnaA01g08890D	0	0	0	0	0	-1.06029
BnaA04g16900D	0	0	0	0	0	-1.05975
BnaA08g27870D	0	0	0	0	0	-1.05908
BnaC09g16260D	0	0	0	0	0	-1.05888
BnaA05g35800D	0	0	0	0	0	-1.0583
BnaC04g39710D	0	0	0	0	0	-1.05765
BnaA10g26410D	0	0	0	0	0	-1.05673
BnaA03g57660D	0	0	0	0	0	-1.05644
BnaC03g32810D	0	0	0	0	0	-1.0556
BnaA09g20050D	0	0	0	0	0	-1.0555
BnaC08g32420D	0	0	0	0	0	-1.05497
BnaA03g16370D	0	0	0	0	0	-1.05486
BnaC05g39200D	0	0	0	0	0	-1.05436
BnaC02g16000D	0	0	0	0	0	-1.0543
BnaC02g36290D	0	0	0	0	0	-1.05406
BnaAnng05830D	0	0	0	0	0	-1.05394
BnaC07g16510D	0	0	0	0	0	-1.05348
BnaCnng07030D	0	0	0	0	0	-1.0528
BnaA01g29630D	0	0	0	0	0	-1.05273
BnaAnng40570D	0	0	0	0	0	-1.05248
BnaC01g22820D	0	0	0	0	0	-1.05238
BnaA09g03590D	0	0	0	0	0	-1.05085
BnaA09g32130D	0	0	0	0	0	-1.05084
BnaA03g21080D	0	0	0	0	0	-1.05044
BnaC01g06870D	0	0	0	0	0	-1.04997
BnaC06g03720D	0	0	0	0	0	-1.04978
BnaC03g46870D	0	0	0	0	0	-1.04949
BnaA06g40300D	0	0	0	0	0	-1.04878
BnaC05g40180D	0	0	0	0	0	-1.04834
BnaA05g18320D	0	0	0	0	0	-1.04759
BnaCnng48860D	0	0	0	0	0	-1.04709
BnaC09g37530D	0	0	0	0	0	-1.04615
BnaC08g08070D	0	0	0	0	0	-1.04582
BnaC09g54350D	0	0	0	0	0	-1.04474
BnaA03g39990D	0	0	0	0	0	-1.04456
BnaC03g04340D	0	0	0	0	0	-1.04404
BnaC01g17720D	0	0	0	0	0	-1.043
BnaC09g30700D	0	0	0	0	0	-1.04287
BnaC03g32130D	0	0	0	0	0	-1.04241
BnaA07g15470D	0	0	0	0	0	-1.03732
BnaC07g40900D	0	0	0	0	0	-1.03477
BnaA02g33970D	0	0	0	0	0	-1.0339
BnaA05g16040D	0	0	0	0	0	-1.03278
BnaC09g31160D	0	0	0	0	0	-1.03204
BnaA05g16430D	0	0	0	0	0	-1.0311
BnaAnng39250D	0	0	0	0	0	-1.02978
BnaC03g35050D	0	0	0	0	0	-1.02849
BnaA09g44170D	0	0	0	0	0	-1.02813
BnaA08g10860D	0	0	0	0	0	-1.02707
BnaA01g07910D	0	0	0	0	0	-1.02579
BnaC01g42890D	0	0	0	0	0	-1.02475
BnaC09g41680D	0	0	0	0	0	-1.02443
BnaC09g01110D	0	0	0	0	0	-1.02385
BnaC06g19080D	0	0	0	0	0	-1.02315
BnaC01g17280D	0	0	0	0	0	-1.02233
BnaA09g26580D	0	0	0	0	0	-1.02041
BnaA08g02930D	0	0	0	0	0	-1.01953
BnaC02g01730D	0	0	0	0	0	-1.0194
BnaCnng25790D	0	0	0	0	0	-1.01886
BnaA03g23340D	0	0	0	0	0	-1.01822
BnaAnng30630D	0	0	0	0	0	-1.01804
BnaA06g15560D	0	0	0	0	0	-1.0176
BnaA05g24630D	0	0	0	0	0	-1.01755
BnaA04g22200D	0	0	0	0	0	-1.01748
BnaCnng22930D	0	0	0	0	0	-1.01703
BnaC03g19960D	0	0	0	0	0	-1.01701
BnaC05g37460D	0	0	0	0	0	-1.01623
BnaC05g11560D	0	0	0	0	0	-1.01573
BnaCnng17950D	0	0	0	0	0	-1.01552
BnaA03g36950D	0	0	0	0	0	-1.01429
BnaA01g24730D	0	0	0	0	0	-1.01324
BnaA06g33730D	0	0	0	0	0	-1.01225
BnaA09g11870D	0	0	0	0	0	-1.01167
BnaC01g07810D	0	0	0	0	0	-1.01116
BnaC05g19430D	0	0	0	0	0	-1.01009
BnaC05g14070D	0	0	0	0	0	-1.00944
BnaA06g33430D	0	0	0	0	0	-1.00892
BnaC09g44830D	0	0	0	0	0	-1.00857
BnaCnng39380D	0	0	0	0	0	-1.00761
BnaA05g17210D	0	0	0	0	0	-1.00737
BnaC03g20140D	0	0	0	0	0	-1.00727
BnaC09g02700D	0	0	0	0	0	-1.00717
BnaA03g27770D	0	0	0	0	0	-1.0068
BnaCnng16050D	0	0	0	0	0	-1.00636
BnaA05g21450D	0	0	0	0	0	-1.00631
BnaC08g13230D	0	0	0	0	0	-1.00592
BnaA09g49160D	0	0	0	0	0	-1.00574
BnaA07g16890D	0	0	0	0	0	-1.00503
BnaA02g36790D	0	0	0	0	0	-1.00497
BnaA03g37240D	0	0	0	0	0	-1.00485
BnaAnng05310D	0	0	0	0	0	-1.0046
BnaA08g17790D	0	0	0	0	0	-1.00441
BnaA03g15330D	0	0	0	0	0	-1.00438
BnaC09g36800D	0	0	0	0	0	-1.00419
BnaA03g19000D	0	0	0	0	0	-1.00407
BnaA05g30530D	0	0	0	0	0	-1.00372
BnaC03g72980D	0	0	0	0	0	-1.00242
BnaA05g22760D	0	0	0	0	0	-1.00241
BnaCnng44460D	0	0	0	0	0	-1.00174
BnaA02g27300D	0	0	0	0	0	-1.00157
BnaCnng70680D	0	0	0	0	0	-1.0012

## Sheet: down-regulated PI PC common
Bna_gene_id	UP	PCLFD2	PCLFD5	PCLFD10	PCLFD20	PCLFD30	PILFD2	PILFD5	PILFD10	PILFD20	PILFD30
BnaA01g02210D	0	0	0	0	-2.42375	0	0	0	0	0	-4.41855
BnaA01g02250D	0	0	0	0	-2.19105	-1.39416	0	0	0	-1.24397	-5.74594
BnaA01g04640D	0	0	0	0	-1.54644	0	0	0	0	-1.08123	-2.65124
BnaA01g06750D	0	0	0	0	-3.469	-1.68432	0	0	0	0	-2.75154
BnaA01g13110D	0	0	0	0	-2.54389	-1.61005	0	0	0	-2.82532	-5.93264
BnaA01g14450D	0	0	0	0	-2.69753	0	0	0	0	-3.05358	-1.11294
BnaA01g32760D	0	0	0	0	-1.86111	0	0	0	0	0	-2.05823
BnaA01g35060D	0	0	0	0	-1.71772	0	0	0	0	-1.38071	-3.44691
BnaA01g35070D	0	0	0	0	-1.47921	0	0	0	0	-1.78415	-3.34215
BnaA02g00670D	0	0	0	0	0	-1.66676	0	0	0	0	-1.03782
BnaA02g15980D	0	0	0	0	-2.00317	0	0	0	0	-1.59342	-4.98736
BnaA02g18750D	0	0	0	0	-1.85632	0	0	0	0	-1.63437	-1.51401
BnaA02g20850D	0	0	0	0	-2.76127	-2.15525	0	0	0	-1.89214	-3.48263
BnaA02g22470D	0	0	0	0	-1.70757	0	0	0	0	0	-2.14918
BnaA02g23460D	0	0	0	0	-2.12706	0	0	0	0	0	-2.763
BnaA02g23670D	0	0	0	0	0	-2.51274	0	0	0	0	-1.93813
BnaA02g27890D	0	0	0	0	0	-1.45273	0	0	0	-1.28152	-1.71015
BnaA02g28200D	0	0	0	0	-1.87297	-1.71596	0	0	0	-1.95635	-2.17697
BnaA02g28980D	0	0	0	0	-1.51297	0	0	0	0	0	-3.01452
BnaA02g30740D	0	0	0	0	-1.8996	0	0	0	0	0	-1.1802
BnaA02g34510D	0	0	0	0	-3.51433	0	0	0	0	-3.81348	-3.43196
BnaA02g37020D	0	0	0	0	-1.36424	0	0	0	0	0	-3.4203
BnaA03g00800D	0	0	0	0	-1.78819	-1.86217	0	0	0	0	-1.99091
BnaA03g00870D	0	0	0	0	-1.78272	-2.20797	0	0	0	-2.18614	-2.35698
BnaA03g01070D	0	0	0	0	-3.10824	-2.28371	-2.1899	0	0	-3.52905	-5.52239
BnaA03g02500D	0	0	0	0	-3.17502	-3.48239	0	0	0	-2.34324	-4.7461
BnaA03g08110D	0	0	0	0	-2.03374	-1.8665	0	0	0	-1.84005	-2.48664
BnaA03g14030D	0	0	0	0	-2.40136	-1.7018	0	0	0	-1.85536	-4.35987
BnaA03g19290D	0	0	0	0	-2.99616	-3.68003	0	0	0	-1.69219	-5.02525
BnaA03g36080D	0	0	0	0	-1.47372	0	0	0	0	0	-2.83788
BnaA03g52940D	0	0	0	0	-1.5122	0	0	0	0	0	-3.24926
BnaA03g53460D	0	0	0	0	-1.61343	0	0	0	0	0	-1.96443
BnaA03g58390D	0	0	0	0	-1.55418	0	0	0	0	-1.12494	-2.26789
BnaA03g59140D	0	0	0	0	-2.19365	-1.65561	0	0	0	-2.23107	-5.4924
BnaA03g59850D	0	0	0	0	-2.24575	0	0	0	0	0	-1.14361
BnaA04g02820D	0	0	0	0	0	-1.65104	0	0	0	0	-1.16191
BnaA04g03900D	0	0	0	0	-1.39868	0	0	0	0	0	-3.50361
BnaA04g06980D	0	0	0	0	-2.35526	-1.59665	0	0	0	-1.31692	-4.53905
BnaA04g11490D	0	0	0	0	-1.83398	0	0	0	0	0	-3.82423
BnaA04g12980D	0	0	0	0	-1.35565	0	0	0	0	0	-2.53076
BnaA04g17070D	0	0	0	0	-1.43433	0	0	0	0	0	-3.03753
BnaA04g17220D	0	0	0	0	-1.39463	0	0	0	0	0	-3.40711
BnaA04g23210D	0	0	0	0	-1.99877	0	0	0	0	-1.40586	-1.34384
BnaA05g12280D	0	0	0	0	-1.53399	0	0	0	0	0	-3.23113
BnaA05g14440D	0	0	0	0	-1.31577	0	0	0	0	0	-2.20409
BnaA05g18490D	0	0	0	0	-1.34964	0	0	0	0	0	-2.49816
BnaA05g19400D	0	0	0	0	-1.68703	-1.69536	0	0	0	0	-2.35577
BnaA05g24610D	0	0	0	0	-3.06828	0	0	0	0	0	-4.24877
BnaA05g25240D	0	0	0	0	-1.9258	-1.4594	0	0	0	-1.96608	-4.77747
BnaA05g28870D	0	0	0	0	0	-1.43173	0	0	0	0	-1.23953
BnaA05g37400D	0	0	0	0	-2.54813	-1.8499	0	0	0	-1.6998	-4.59987
BnaA06g02680D	0	0	0	0	-1.88918	0	0	0	0	-1.25499	-3.22992
BnaA06g06510D	0	0	0	0	-1.75789	-1.80282	0	0	0	-2.05303	-2.75588
BnaA06g08140D	0	0	0	0	-2.184	0	0	0	0	-1.54843	-1.88055
BnaA06g15550D	0	0	0	0	-1.48785	0	0	0	0	-1.61256	-2.45392
BnaA06g17510D	0	0	0	0	-2.31275	0	0	0	0	-1.79441	-2.85626
BnaA06g26560D	0	0	0	0	-2.04452	0	0	0	0	-1.6431	-3.14187
BnaA06g36250D	0	0	0	0	0	-2.04949	0	0	0	0	-1.24205
BnaA06g39280D	0	0	0	0	-1.72942	0	0	0	0	0	-2.62092
BnaA07g05380D	0	0	0	0	-2.59946	0	0	0	0	0	-3.28646
BnaA07g11370D	0	0	0	0	-1.97539	0	0	0	0	-1.34882	-3.75308
BnaA07g12830D	0	0	0	0	-1.73864	0	0	0	0	0	-2.88996
BnaA07g25540D	0	0	0	0	-2.2427	-1.7032	0	0	0	-2.02324	-4.77796
BnaA07g30160D	0	0	0	0	-2.12139	0	0	0	0	-1.91896	-3.88355
BnaA07g30180D	0	0	0	0	-1.84243	0	0	0	0	-1.68366	-5.33144
BnaA07g33960D	0	0	0	0	-4.36306	-2.37068	0	0	0	-2.10565	-5.16191
BnaA07g38680D	0	0	0	0	0	-1.85889	0	0	0	0	-1.33162
BnaA08g15350D	0	0	0	0	-1.40313	0	0	0	0	-1.06388	-3.66133
BnaA08g16370D	0	0	0	0	-1.59723	0	0	0	0	0	-2.33224
BnaA08g17420D	0	0	0	0	-1.38079	0	0	0	0	0	-2.4621
BnaA08g25590D	0	0	0	0	-1.4101	0	0	0	0	0	-3.00821
BnaA09g04320D	0	0	0	0	-1.46622	0	0	0	0	0	-3.82328
BnaA09g10050D	0	0	0	0	-2.68987	0	0	0	0	0	-4.46748
BnaA09g12650D	0	0	0	0	-2.06912	0	0	0	0	-1.80235	-4.55692
BnaA09g13300D	0	0	-1.99532	0	-1.73977	-2.11083	0	0	-2.15579	-1.38035	-2.61259
BnaA09g16990D	0	0	0	0	-1.50595	0	0	0	0	0	-3.31303
BnaA09g20060D	0	0	0	0	-1.35248	0	0	0	0	0	-1.97881
BnaA09g20070D	0	0	0	0	-1.62192	0	0	0	0	0	-1.37548
BnaA09g26470D	0	0	0	0	-1.82597	0	0	0	0	0	-3.79814
BnaA09g30050D	0	0	0	0	-1.43511	0	0	0	0	0	-3.12652
BnaA09g33600D	0	0	0	0	-1.6231	0	0	0	0	-1.34328	-4.94801
BnaA09g52510D	0	0	0	0	-2.17951	0	0	0	0	-2.05037	-4.3198
BnaA09g56100D	0	0	0	0	-2.15945	0	0	0	0	-1.60692	-2.91225
BnaA10g01190D	0	0	0	0	-1.84197	0	0	0	0	-1.68031	-3.49783
BnaA10g07360D	0	0	0	0	-1.42698	0	0	0	0	0	-2.2018
BnaA10g09490D	0	0	0	0	-2.67237	-2.00325	0	0	0	-1.39081	-2.80551
BnaA10g25430D	0	0	0	0	0	-1.84285	0	0	0	0	-2.31269
BnaAnng01300D	0	0	0	0	-4.12085	0	0	0	0	-3.41646	-8.24528
BnaAnng08970D	0	0	0	0	-1.44368	0	0	0	0	-1.24609	-2.34705
BnaAnng10720D	0	0	0	0	-1.47416	0	0	0	0	0	-2.23385
BnaAnng25560D	0	0	0	0	-1.58415	0	0	0	0	0	-1.21334
BnaAnng27090D	0	0	0	0	-1.56331	0	0	0	0	0	-4.12725
BnaC01g03410D	0	0	0	0	-1.80389	0	0	0	0	-1.57148	-1.78981
BnaC01g08130D	0	0	0	0	-2.49152	0	0	0	0	-1.69297	-4.65748
BnaC01g13480D	0	0	0	0	-2.23868	-1.76335	0	0	0	-1.4945	-4.06117
BnaC01g20890D	0	0	0	0	-2.57099	0	0	0	0	0	-2.83935
BnaC01g30750D	0	0	0	0	-1.51899	0	0	0	0	0	-1.24789
BnaC01g38800D	0	0	0	0	-2.03665	0	0	0	0	-2.28621	-3.36518
BnaC01g40400D	0	0	0	0	0	-1.89241	0	0	0	0	-1.09474
BnaC01g42990D	0	0	0	0	-1.32913	0	0	0	0	0	-1.78181
BnaC02g00130D	0	0	-2.83052	0	-2.84386	-2.93908	0	0	-3.1873	0	-2.22136
BnaC02g08600D	0	0	0	0	-1.6766	0	0	0	0	0	-2.20706
BnaC02g39030D	0	0	0	0	-2.72841	0	0	0	0	0	-1.88633
BnaC02g39100D	0	0	0	0	-1.67446	0	0	0	0	0	-1.78325
BnaC03g03510D	0	0	0	0	-3.67062	-3.25022	0	0	0	-3.24248	-4.92391
BnaC03g11850D	0	0	0	0	0	-2.26675	0	0	0	0	-1.36583
BnaC03g14470D	0	0	0	0	-2.05295	0	0	0	0	-1.20954	-3.68382
BnaC03g16990D	0	0	0	0	-3.39464	-2.46586	0	0	0	-2.58685	-5.99779
BnaC03g32510D	0	0	0	0	-2.51544	0	0	0	0	-1.81354	-5.53581
BnaC03g33190D	0	0	0	0	-2.21009	-2.18646	0	0	0	0	-3.66543
BnaC03g33650D	0	0	0	0	-1.63607	0	0	0	0	0	-1.19604
BnaC03g60270D	0	0	0	0	-1.60404	0	0	0	0	0	-1.95371
BnaC03g61550D	0	0	0	0	-2.11128	0	0	0	0	-1.83629	-2.88011
BnaC03g67980D	0	0	0	0	-2.66589	0	0	0	0	0	-2.97137
BnaC04g00090D	0	0	0	0	-1.42099	0	0	0	0	-1.43491	-5.58769
BnaC04g14700D	0	0	0	0	0	-1.76187	0	0	0	0	-2.9093
BnaC04g14770D	0	0	0	0	0	-1.51503	0	0	0	0	-1.21088
BnaC04g19370D	0	0	0	0	-1.54035	0	0	0	0	0	-2.51865
BnaC04g34320D	0	0	0	0	-2.09417	-2.10923	0	0	0	-1.21647	-3.13305
BnaC04g43390D	0	0	0	0	-2.20788	-2.41996	0	0	0	0	-1.29407
BnaC04g46980D	0	0	0	0	-1.75653	0	0	0	0	-1.54191	-3.97695
BnaC05g18500D	0	0	0	0	-1.65986	0	0	0	0	0	-3.6147
BnaC05g36540D	0	0	0	0	-1.58483	0	0	0	0	0	-3.37948
BnaC05g37000D	0	0	0	0	-3.768	0	0	0	0	0	-2.62614
BnaC05g39020D	0	0	0	0	-1.67749	0	0	0	0	-1.28292	-2.71172
BnaC05g42780D	0	0	0	0	-1.89034	0	0	0	0	0	-3.4083
BnaC05g46960D	0	0	0	0	-1.83285	0	0	0	0	0	-2.2471
BnaC05g47720D	0	0	0	0	-2.34174	0	0	0	0	-1.61047	-2.76075
BnaC06g04530D	0	0	0	0	-1.60945	-1.96472	0	0	0	0	-1.4208
BnaC06g05990D	0	0	0	0	-2.8539	0	0	0	0	0	-4.68883
BnaC06g09380D	0	0	0	0	-1.56592	-1.50497	0	0	0	-1.38068	-4.23508
BnaC06g12920D	0	0	0	0	-1.49567	0	0	0	0	-1.27585	-2.05416
BnaC06g22480D	0	0	0	0	-1.84291	0	0	0	0	-1.30156	-2.8744
BnaC06g23520D	0	0	0	0	0	-1.84516	0	0	0	0	-1.46978
BnaC06g26300D	0	0	0	0	-1.87076	-2.41694	0	0	0	-1.72387	-2.05747
BnaC07g02460D	0	0	0	0	-2.50065	-1.62432	0	0	0	-1.62774	-3.89359
BnaC07g03950D	0	0	0	0	-2.05521	0	0	0	0	0	-2.66122
BnaC07g09400D	0	0	0	0	0	-1.32641	0	0	0	0	-1.7265
BnaC07g26010D	0	0	0	0	-1.54164	0	0	0	0	0	-1.904
BnaC07g42500D	0	0	0	0	-1.74912	-1.7325	0	0	0	-1.64808	-2.51239
BnaC07g45430D	0	0	0	0	-1.63602	0	0	0	0	-1.96992	-4.88564
BnaC07g46910D	0	0	0	0	-3.44846	-2.28695	-3.44362	0	0	-2.57396	-4.34538
BnaC07g47480D	0	0	0	0	-2.09767	0	0	0	0	0	-2.13505
BnaC08g14510D	0	0	0	0	-1.44485	0	0	0	0	0	-2.18314
BnaC08g32450D	0	0	0	0	-1.98565	0	0	0	0	-1.40611	-2.98087
BnaC08g34050D	0	0	0	0	-1.59842	0	0	0	0	0	-5.10848
BnaC08g35830D	0	0	0	0	0	-1.48024	0	0	0	0	-1.5813
BnaC08g37340D	0	0	0	0	-1.66843	0	0	0	0	-1.7887	-5.0718
BnaC09g04840D	0	0	0	0	-1.53308	-1.48044	0	0	0	0	-3.61679
BnaC09g06210D	0	0	0	0	-2.8032	0	0	0	0	0	-2.44564
BnaC09g10140D	0	0	0	0	-2.86509	0	0	0	0	0	-4.89268
BnaC09g10680D	0	0	0	0	-2.01329	-1.48279	0	0	0	-1.53981	-2.22403
BnaC09g30560D	0	0	0	0	-1.57299	-1.68585	-1.98607	0	0	-1.72809	-2.67963
BnaC09g32640D	0	0	0	0	-1.65902	0	0	0	0	0	-3.25141
BnaC09g45170D	0	0	0	0	-2.96039	-2.94408	0	0	0	-2.70331	-5.17139
BnaC09g50190D	0	0	0	0	-1.71834	0	0	0	0	0	-3.9061
BnaC09g52180D	0	0	0	0	-1.5512	0	0	0	0	0	-2.58831
BnaC09g52640D	0	0	0	0	-2.31675	-1.76747	0	0	0	0	-1.43869
BnaCnng01720D	0	0	0	0	-1.45661	0	0	0	0	-1.34144	-1.9119
BnaCnng01740D	0	0	0	0	-2.06271	-1.67256	0	0	0	-1.40399	-3.73444
BnaCnng07050D	0	0	0	0	-1.81284	0	0	0	0	0	-3.25948
BnaCnng07700D	0	0	0	0	-2.03314	0	0	0	0	-1.82289	-5.29758
BnaCnng18100D	0	0	0	0	0	-1.56792	0	0	0	0	-1.48499
BnaCnng30450D	0	-1.96284	-1.81152	-1.88814	-2.68506	-2.59174	0	0	-2.14021	-1.70371	-1.613
BnaCnng38030D	0	0	0	0	-1.47204	0	0	0	0	0	-2.47262
BnaCnng38150D	0	0	0	0	-1.64622	0	0	0	0	-1.12306	-2.02738
BnaCnng40440D	0	0	0	0	-1.42753	0	0	0	0	0	-3.09128
BnaCnng58640D	0	0	0	0	-1.68283	0	0	0	0	0	-2.7024
BnaCnng58860D	0	0	0	0	-1.46653	0	0	0	0	0	-1.96787
BnaCnng59680D	0	0	0	0	-1.46302	0	0	0	0	0	-1.86592
BnaCnng62910D	0	0	0	0	-2.50319	0	0	0	0	-2.62838	-2.23283
BnaCnng63480D	0	0	0	0	-1.85286	0	0	0	0	0	-2.83765
BnaUnng03570D	0	0	0	0	-2.69003	-1.44649	0	0	0	-1.28762	-4.06576
